# Supplementary material for: Marker-assisted introgression of wild chromosome segments conferring resistance to fungal foliar diseases into peanut (Arachis hypogaea L.)
Source: Front Plant Sci. 2023 Mar 17;14:1139361. doi: 10.3389/fpls.2023.1139361 (PMC10088909; doi:10.3389/fpls.2023.1139361)
Supplement: Supplementary file 1 [file Table_1.xlsx]

## Sheet: Legend
		Genotyping codes:
		-	homozygous for the A. hypogaea allele
		Sten1	heterozygous
		Sten2	homozygous for the A. stenosperma allele
		Mag1	heterozygous
		Mag2	homozygous for the A. magna allele

## Sheet: Sheet1
		Generation	BC3F2	BC3F2	BC3F2	BC3F2	BC3F2	BC3F2	BC3F2	BC3F2	BC3F2	BC3F2	BC3F2	BC3F2	BC3F2	BC3F2	BC3F2	BC3F2	BC3F2	BC3F2	BC3F2	BC3F2	BC3F2	BC3F2	BC3F2	BC3F2	BC3F2	BC3F2	BC3F2	BC3F2	BC3F2	BC3F2	BC3F2	BC3F2	BC3F2	BC3F2	BC3F2	BC3F2	BC3F2	BC3F2	BC3F2	BC3F2	BC3F2	BC3F2	BC3F2	BC3F2	BC3F2	BC3F2	BC3F2
		Plant	MagSten	IAC OL4	Ar090A-(12)-1-1	Ar091A-(58)-7-13	Ar090A-(12)-1-2	Ar091A-(58)-7-14	Ar090A-(12)-1-3	Ar091A-(58)-7-15	Ar090A-(12)-1-4	Ar091A-(58)-7-16	Ar090A-(12)-1-5	Ar091A-(58)-7-17	Ar090A-(12)-1-6	Ar091A-(58)-7-18	Ar090A-(12)-1-7	Ar091A-(58)-7-19	Ar090A-(12)-1-8	Ar091A-(58)-7-20	Ar092A-(82)-17-5	Ar093A-(115)-24-1	Ar092A-(82)-17-7	Ar093A-(115)-24-2	Ar092A-(82)-17-8	Ar093A-(115)-24-3	Ar092A-(82)-17-9	Ar093A-(115)-24-4	Ar092A-(82)-17-10	Ar093A-(115)-24-5	Ar092A-(82)-17-11	Ar093A-(115)-24-6	Ar092A-(82)-17-12	Ar093A-(115)-24-7	Ar092A-(82)-17-13	Ar093A-(115)-24-8	Ar092A-(82)-17-14	Ar093A-(115)-24-9	Ar092A-(82)-18-1	Ar093A-(115)-24-10	Ar090A-(12)-1-9	Ar091A-(58)-8-1	Ar090A-(12)-1-10	Ar091A-(58)-8-2	Ar090A-(12)-1-11	Ar091A-(58)-8-3	Ar090A-(12)-1-12	Ar091A-(58)-8-4	Ar090A-(12)-1-13
		LLS score			5	7	7.5	7	7	7.5	7	6.5	6.5	7.5	5	7.5	5	8	7	8	7	3.5	7	7	7.5	6.5	8	6	8	7	7.5	7.5	8	8	7.5	4	7.5	7	4.5	4	3	6.5	6.5	6.5	5.5	7.5	7	7.5	7
		Rust			0	1	1	1	0	1	0	0	1	1	0	0	0	1	0	1	1	0	1	1	1	0	1	0	1	1	1	1	1	1	1	0	0	1	1	0	0	0	0	0	0	1	0	1	0
		Yield			36	152	132.625	168	29	217	125	209	140	209	145	192	295	63	132.625	235	120	218	228	125	269	112	141	200	166.364	156	54	111	239	97	186	109	115	243	77	98	104	138	48	173	99	83	132.625	118	81
		% A.stenosperma	89.1616	0.55918	12.0414	7.71402	8.27068	10.4673	5.33708	10.0281	14.5972	8.73239	14.4886	5.78358	20.5273	10.3933	14.3791	10.0281	9.12512	6.91643	8.03738	13.3895	4.00746	12.5351	8.84211	13.2643	8.33333	13.3895	7.94393	12.894	7.43879	13.271	8.49858	13.0272	2.42764	16.4794	7.50469	11.6367	6.23819	12.3574	16.0714	9.65323	13.3584	9.82226	15.0094	9.16745	6.92236	9.64419	13.7476
		% A.magna	93.5532	0.668449	17.3854	15.5313	7.11409	11.2299	15.1882	20.3779	14.6505	22.2372	14.5553	7.10456	17.4731	15.4987	15.5705	16.4219	13.6729	21.2414	14.2282	24.5614	11.6466	19.8391	16.3174	18.7584	15.6124	18.9008	15.5705	16.7785	17.663	17.7807	7.90191	17.1582	14.1901	25.8412	17.3025	17.3154	14.0731	25.3772	13.6364	16.4199	17.7658	16.756	17.2087	13.6913	16.2198	11.4247	24.5257
SNP Affy	Chromosome	Position
AX-147207636	Aradu.A01	230496	Sten1	-	-	-	-	-	-	-	-	-	-	-	-	-	-	-	-	-	-	Sten1	-	Sten1	-	-	-	Sten1	-	Sten2	-	Sten1	-	Sten1	-	Sten1	-	Sten1	-	Sten1	Sten1	-	-	-	-	-	-	-	-
AX-176791317	Aradu.A01	510521	Sten2	-	-	-	-	-	-	-	-	-	-	-	-	-	-	-	-	-	-	Sten1	-	Sten1	-	Sten1	-	Sten1	-	Sten2	-	Sten1	-	Sten1	-	Sten1	-	Sten1	-	Sten2	Sten1	-	-	-	-	-	-	-	-
AX-147265635	Aradu.A01	595640	Sten2	-	-	-	-	-	-	-	-	-	-	-	-	-	-	-	-	-	-	Sten1	-	Sten1	-	Sten1	-	Sten1	-	Sten1	-	Sten1	-	Sten1	-	Sten1	-	Sten1	-	Sten1	Sten1	-	-	-	-	-	-	-	-
AX-147207739	Aradu.A01	738171	Sten2	-	-	-	-	-	-	-	-	-	-	-	-	-	-	-	-	-	-	Sten1	-	Sten1	-	Sten1	-	Sten1	-	Sten2	-	Sten1	-	Sten1	-	Sten1	-	Sten1	-	Sten2	Sten1	-	-	-	-	-	-	-	-
AX-147207741	Aradu.A01	748457	Sten2	-	-	-	-	-	-	-	-	-	-	-	-	-	-	-	-	-	-	Sten1	-	Sten1	-	Sten1	-	Sten1	-	Sten2	-	Sten1	-	Sten1	-	Sten1	-	Sten1	-	Sten2	Sten1	-	-	-	-	-	-	-	-
AX-147207744	Aradu.A01	773107	Sten2	-	-	-	-	-	-	-	-	-	-	-	-	-	-	-	-	-	-	Sten1	-	Sten1	-	Sten1	-	Sten1	-	Sten2	-	Sten1	-	Sten1	-	Sten1	-	Sten1	-	-	Sten1	-	-	-	-	-	-	-	-
AX-147207750	Aradu.A01	785346	Sten2	-	-	-	-	-	-	-	-	-	-	-	-	-	-	-	-	-	-	Sten1	-	Sten1	-	Sten1	-	Sten1	-	-	-	Sten1	-	Sten1	-	Sten1	-	Sten1	-	Sten1	Sten1	-	-	-	-	-	-	-	-
AX-147207751	Aradu.A01	795710	Sten2	-	-	-	-	-	-	-	-	-	-	-	-	-	-	-	-	-	-	Sten1	-	Sten1	-	Sten1	-	Sten1	-	Sten2	-	Sten1	-	Sten1	-	Sten1	-	Sten1	-	Sten2	Sten1	-	-	-	-	-	-	-	-
AX-147207766	Aradu.A01	907490	Sten2	-	-	-	-	-	-	-	-	-	-	-	-	-	-	-	-	Sten1	-	Sten1	-	Sten1	-	Sten1	-	Sten1	-	Sten2	-	Sten1	-	Sten1	-	Sten1	-	Sten1	-	Sten2	Sten1	-	-	-	-	-	-	-	-
AX-147207768	Aradu.A01	922352	Sten2	-	-	-	-	-	-	-	-	-	-	-	-	-	-	-	-	-	-	Sten1	-	Sten1	-	Sten1	-	Sten1	-	Sten2	-	Sten1	-	Sten1	-	Sten1	-	Sten1	-	Sten2	Sten1	-	-	-	-	-	-	-	-
AX-147207782	Aradu.A01	1006721	Sten2	-	-	-	-	-	-	-	-	-	-	-	-	-	-	-	-	-	-	Sten1	-	Sten1	-	Sten1	-	Sten1	-	Sten2	-	Sten1	-	Sten1	-	Sten1	-	Sten1	-	Sten2	Sten1	-	-	-	-	-	-	-	-
AX-147207792	Aradu.A01	1040768	Sten2	-	-	-	-	-	-	-	-	-	-	-	-	-	-	-	-	-	-	Sten1	-	Sten1	-	Sten1	-	Sten1	-	-	-	Sten1	-	Sten1	-	Sten1	-	Sten1	-	Sten2	Sten1	-	-	-	-	-	-	-	-
AX-147207796	Aradu.A01	1043415	Sten2	-	-	-	-	-	-	-	-	-	-	-	-	-	-	-	-	-	-	Sten1	-	Sten1	-	Sten1	-	Sten1	-	Sten2	-	Sten1	-	Sten1	-	Sten1	-	Sten1	-	Sten2	Sten1	-	-	-	-	-	-	-	-
AX-147207810	Aradu.A01	1117391	Sten2	-	-	-	-	-	-	-	-	-	-	-	-	-	-	-	-	-	-	Sten1	-	Sten1	-	Sten1	-	Sten1	-	Sten2	-	Sten1	-	Sten1	-	Sten1	-	Sten1	-	Sten2	Sten1	-	-	-	-	-	-	-	-
AX-147207811	Aradu.A01	1117549	Sten2	-	-	-	-	-	-	-	-	-	-	-	-	-	-	-	-	-	-	Sten1	-	Sten1	-	Sten1	-	Sten1	-	Sten2	-	Sten1	-	Sten1	-	Sten1	-	Sten1	-	Sten2	Sten1	-	-	-	-	-	-	-	-
AX-147265656	Aradu.A01	1185064	Sten2	-	-	-	-	-	-	-	-	-	-	-	-	-	-	-	-	-	-	Sten1	-	Sten1	-	Sten1	-	Sten1	-	Sten2	-	Sten1	-	Sten1	-	Sten1	-	Sten1	-	Sten2	Sten1	-	-	-	-	-	-	-	-
AX-147207859	Aradu.A01	1397197	Sten2	-	-	-	-	-	-	-	-	-	-	-	-	-	-	-	-	Sten1	-	Sten1	-	Sten1	-	Sten1	-	Sten1	-	Sten2	-	Sten1	-	Sten1	-	Sten1	-	Sten1	-	Sten2	Sten1	-	-	-	-	-	-	-	-
AX-176791373	Aradu.A01	1399041	Sten2	-	-	-	-	-	-	-	-	-	-	-	-	-	-	-	-	Sten1	-	Sten1	-	Sten1	-	Sten1	-	Sten1	-	-	-	Sten1	-	Sten1	-	Sten1	-	Sten1	-	-	Sten1	-	-	-	-	-	-	-	-
AX-147207865	Aradu.A01	1399658	Sten2	-	-	-	-	-	-	-	-	-	-	-	-	-	-	-	-	Sten1	-	Sten1	-	Sten1	-	Sten1	-	Sten1	-	Sten2	-	Sten1	-	Sten1	-	Sten1	-	Sten1	-	Sten2	Sten1	-	-	-	-	-	-	-	-
AX-147207867	Aradu.A01	1427181	Sten2	-	-	-	-	-	-	-	-	-	-	-	-	-	-	-	-	-	-	Sten1	-	Sten1	-	Sten1	-	Sten1	-	Sten2	-	Sten1	-	Sten1	-	Sten1	-	Sten1	-	Sten2	Sten1	-	-	-	-	-	-	-	-
AX-147207874	Aradu.A01	1450824	Sten2	-	-	-	-	-	-	-	-	-	-	-	-	-	-	-	-	Sten1	-	Sten1	-	Sten1	-	-	-	Sten1	-	Sten2	-	Sten1	-	Sten1	-	Sten1	-	Sten1	-	Sten2	Sten1	-	-	-	-	-	-	-	-
AX-147207931	Aradu.A01	1651483	Sten2	-	-	-	-	-	-	-	-	-	-	-	-	-	-	-	-	-	-	Sten1	-	Sten1	-	Sten1	-	Sten1	-	Sten2	-	Sten1	-	Sten1	-	Sten1	-	Sten1	-	-	Sten1	-	-	-	-	-	-	-	-
AX-147207942	Aradu.A01	1705064	Sten2	-	-	-	-	-	-	-	-	-	-	-	-	-	-	-	-	-	-	Sten1	-	Sten1	-	Sten1	-	Sten1	-	Sten2	-	Sten1	-	Sten1	-	Sten1	-	Sten1	-	Sten2	Sten1	-	-	-	-	-	-	-	-
AX-147207949	Aradu.A01	1724608	Sten2	-	-	-	-	-	-	-	-	-	-	-	-	-	-	-	-	-	-	Sten1	-	Sten1	-	Sten1	-	Sten1	-	Sten2	-	Sten1	-	Sten1	-	Sten1	-	Sten1	-	-	Sten1	-	-	-	-	-	-	-	-
AX-147207952	Aradu.A01	1734212	Sten2	-	-	-	-	-	-	-	-	-	-	-	-	-	-	-	-	Sten1	-	Sten1	-	Sten1	-	Sten1	-	Sten1	-	Sten2	-	Sten1	-	Sten1	-	Sten1	-	Sten1	-	Sten2	Sten1	-	-	-	-	-	-	-	-
AX-147207960	Aradu.A01	1777026	Sten2	-	-	-	-	-	-	-	-	-	-	-	-	-	-	-	-	-	-	Sten1	-	Sten1	-	Sten1	-	Sten1	-	Sten2	-	Sten1	-	Sten1	-	Sten1	-	Sten1	-	Sten2	Sten1	-	-	-	-	-	-	-	-
AX-147207965	Aradu.A01	1783428	Sten2	-	-	-	-	-	-	-	-	-	-	-	-	-	-	-	-	-	-	Sten1	-	Sten1	-	Sten1	-	Sten1	-	-	-	Sten1	-	Sten1	-	Sten1	-	Sten1	-	Sten1	Sten1	-	-	-	-	-	-	-	-
AX-147207971	Aradu.A01	1788137	Sten2	-	-	-	-	-	-	-	-	-	-	-	-	-	-	-	-	-	-	Sten1	-	Sten1	-	Sten1	-	Sten1	-	Sten2	-	Sten1	-	Sten1	-	Sten1	-	Sten1	-	Sten1	Sten1	-	-	-	-	-	-	-	-
AX-147207989	Aradu.A01	1845128	Sten2	-	-	-	-	-	-	-	-	-	-	-	-	-	-	-	-	-	-	Sten1	-	Sten1	-	Sten1	-	Sten1	-	-	-	Sten1	-	Sten1	-	Sten1	-	Sten1	-	-	Sten1	-	-	-	-	-	-	-	-
AX-176791319	Aradu.A01	1873370	Sten2	-	-	-	-	-	-	-	-	-	-	-	-	-	-	-	-	-	-	Sten1	-	Sten1	-	Sten1	-	Sten1	-	Sten2	-	Sten1	-	Sten1	-	Sten1	-	Sten1	-	Sten1	Sten1	-	-	-	-	-	-	-	-
AX-147208012	Aradu.A01	1916852	Sten2	-	-	-	-	-	-	-	-	-	-	-	-	-	-	-	-	Sten1	-	Sten1	-	Sten1	-	Sten1	-	Sten1	-	Sten2	-	Sten1	-	Sten1	-	Sten1	-	Sten1	-	Sten2	Sten1	-	-	-	-	-	-	-	-
AX-147208016	Aradu.A01	1950993	Sten2	-	-	-	-	-	-	-	-	-	-	-	-	-	-	-	-	Sten1	-	Sten1	-	Sten1	-	Sten1	-	Sten1	-	Sten2	-	Sten1	-	Sten1	-	Sten1	-	Sten1	-	Sten2	Sten1	-	-	-	-	-	-	-	-
AX-147208027	Aradu.A01	1979329	Sten2	-	-	-	-	-	-	-	-	-	-	-	-	-	-	-	-	-	-	Sten1	-	Sten1	-	Sten1	-	Sten1	-	Sten2	-	Sten1	-	Sten1	-	Sten1	-	Sten1	-	Sten1	Sten1	-	-	-	-	-	-	-	-
AX-147208038	Aradu.A01	1984099	-	-	-	-	-	-	-	-	-	-	-	-	-	-	-	-	-	-	-	Sten1	-	Sten1	-	Sten1	-	Sten1	-	Sten2	-	Sten1	-	Sten1	-	Sten1	-	Sten1	-	Sten1	Sten1	-	-	-	-	-	-	-	-
AX-147208052	Aradu.A01	2010272	Sten2	-	-	-	-	-	-	-	-	-	-	-	-	-	-	-	-	-	-	Sten1	-	Sten1	-	Sten1	-	Sten1	-	-	-	Sten1	-	Sten1	-	Sten1	-	Sten1	-	Sten2	Sten1	-	-	-	-	-	-	-	-
AX-147208055	Aradu.A01	2010809	Sten2	-	-	-	-	-	-	-	-	-	-	-	-	-	-	-	-	Sten1	-	Sten1	-	Sten1	-	Sten1	-	Sten1	-	Sten2	-	Sten1	-	Sten1	-	Sten1	-	Sten1	-	Sten2	Sten1	-	-	-	-	-	-	-	-
AX-147208069	Aradu.A01	2110707	Sten2	-	-	-	-	-	-	-	-	-	-	-	-	-	-	-	-	-	-	Sten1	-	Sten1	-	Sten1	-	Sten1	-	-	-	Sten1	-	Sten1	-	Sten1	-	Sten1	-	Sten1	Sten1	-	-	-	-	-	-	-	-
AX-147208100	Aradu.A01	2272833	Sten2	-	-	-	-	-	-	-	-	-	-	-	-	-	-	-	-	Sten1	-	Sten1	-	Sten1	-	Sten1	-	Sten1	-	Sten2	-	Sten1	-	Sten1	-	Sten1	-	Sten1	-	Sten2	Sten1	-	-	-	-	-	-	-	-
AX-147208101	Aradu.A01	2278223	Sten2	-	-	-	-	-	-	-	-	-	-	-	-	-	-	-	-	-	-	Sten1	-	Sten1	-	Sten1	-	Sten1	-	Sten2	-	Sten1	-	Sten1	-	Sten1	-	Sten1	-	Sten2	Sten1	-	-	-	-	-	-	-	-
AX-147208105	Aradu.A01	2303999	Sten2	-	-	-	-	-	-	-	-	-	-	-	-	-	-	-	-	-	-	Sten1	-	Sten1	-	Sten1	-	Sten1	-	Sten2	-	Sten1	-	Sten1	-	Sten1	-	Sten1	-	Sten2	Sten1	-	-	-	-	-	-	-	-
AX-147208106	Aradu.A01	2304266	Sten2	-	-	-	-	-	-	-	-	-	-	-	-	-	-	-	-	-	-	Sten1	-	Sten1	-	Sten1	-	Sten1	-	-	-	Sten1	-	-	-	Sten1	-	Sten1	-	Sten1	Sten1	-	-	-	-	-	-	-	-
AX-147208130	Aradu.A01	2434150	Sten2	-	-	-	-	-	-	-	-	-	-	-	-	-	-	-	-	-	-	Sten1	-	Sten1	Sten1	Sten1	-	Sten1	-	Sten2	-	Sten1	-	Sten1	-	Sten1	-	-	-	Sten2	Sten1	-	-	-	-	-	-	-	-
AX-147208131	Aradu.A01	2439513	-	-	-	-	-	-	-	-	-	-	-	-	-	-	-	-	-	-	-	Sten1	-	Sten1	-	Sten1	-	Sten1	-	Sten2	-	Sten1	-	Sten1	-	Sten1	-	Sten1	-	-	Sten1	-	-	-	-	-	-	-	-
AX-147208153	Aradu.A01	2784796	Sten2	-	-	-	-	-	-	-	-	-	-	-	-	-	-	-	-	-	-	Sten1	-	Sten1	-	Sten1	-	Sten1	-	Sten2	-	Sten1	-	Sten1	-	Sten1	-	Sten1	-	Sten1	Sten1	-	-	-	-	-	-	-	-
AX-147208184	Aradu.A01	2897855	-	-	-	-	-	-	-	-	-	-	-	-	-	-	-	-	-	-	-	Sten1	-	Sten1	-	Sten1	-	Sten1	-	Sten2	-	Sten1	-	Sten1	-	Sten1	-	Sten1	-	-	Sten1	-	-	-	-	-	-	-	-
AX-147208217	Aradu.A01	3034640	Sten2	-	-	-	-	-	-	-	-	-	-	-	-	-	-	-	-	Sten1	-	Sten1	-	Sten1	-	Sten1	-	Sten1	-	Sten2	-	Sten1	-	Sten1	-	Sten1	-	Sten1	-	-	Sten1	-	-	-	-	-	-	-	-
AX-147208225	Aradu.A01	3071017	Sten2	-	-	-	-	-	-	-	-	-	-	-	-	-	-	-	-	-	-	Sten1	-	Sten1	-	Sten1	-	Sten1	-	Sten2	-	Sten1	-	Sten1	-	Sten1	-	Sten1	-	Sten2	Sten1	-	-	-	-	-	-	-	-
AX-147265734	Aradu.A01	3120188	Sten2	-	-	-	-	-	-	-	-	-	-	-	-	-	-	-	-	-	-	Sten1	-	Sten1	-	Sten1	-	Sten1	-	Sten2	-	Sten1	-	Sten1	-	Sten1	-	Sten1	-	Sten2	Sten1	-	-	-	-	-	-	-	-
AX-147208245	Aradu.A01	3120434	Sten2	-	-	-	-	-	-	-	-	-	-	-	-	-	-	-	-	-	-	Sten1	-	Sten1	-	Sten1	-	Sten1	-	Sten2	-	Sten1	-	Sten1	-	Sten1	-	Sten1	-	-	Sten1	-	-	-	-	-	-	-	-
AX-147208252	Aradu.A01	3128533	Sten2	-	-	-	-	-	-	-	-	-	-	-	-	-	-	-	-	-	-	Sten1	-	Sten1	-	Sten1	-	Sten1	-	Sten2	-	Sten1	-	Sten1	-	Sten1	-	Sten1	-	Sten2	Sten1	-	-	-	-	-	-	-	-
AX-147208277	Aradu.A01	3171803	Sten2	-	-	-	-	-	-	-	-	-	-	-	-	-	-	-	-	-	-	Sten1	-	Sten1	-	Sten1	-	Sten1	-	Sten2	-	Sten1	-	Sten1	-	Sten1	-	Sten1	-	Sten2	Sten1	-	-	-	-	-	-	-	-
AX-147208281	Aradu.A01	3173724	Sten2	-	-	-	-	-	-	-	-	-	-	-	-	-	-	-	-	-	-	Sten1	-	Sten1	-	Sten1	-	Sten1	-	Sten2	-	Sten1	-	Sten1	-	Sten1	-	Sten1	-	Sten1	Sten1	-	-	-	-	-	-	-	-
AX-147265751	Aradu.A01	3331989	Sten2	-	-	-	-	-	-	-	-	-	-	-	-	-	Sten1	-	-	-	-	Sten1	-	Sten1	-	Sten1	-	Sten1	-	Sten2	-	Sten1	-	Sten1	-	Sten1	-	Sten1	-	-	Sten1	-	-	-	-	-	-	-	-
AX-147208313	Aradu.A01	3335170	Sten2	-	-	-	-	-	-	-	-	-	-	-	-	-	-	-	-	-	-	Sten1	-	Sten1	-	Sten1	-	Sten1	-	Sten2	-	Sten1	-	Sten1	-	Sten1	-	Sten1	-	Sten2	Sten1	-	-	-	-	-	-	-	-
AX-147208320	Aradu.A01	3362317	Sten2	-	-	-	-	-	-	-	-	-	-	-	-	-	-	-	-	-	-	Sten1	-	Sten1	-	Sten1	-	Sten1	-	Sten2	-	Sten1	-	Sten1	-	Sten1	-	Sten1	-	Sten2	Sten1	-	-	-	-	-	-	-	-
AX-147208345	Aradu.A01	3438883	Sten2	-	-	-	-	-	-	-	-	-	-	-	-	-	-	-	-	-	-	Sten1	-	Sten1	-	Sten1	-	Sten1	-	-	-	Sten1	-	Sten1	-	Sten1	-	Sten1	-	Sten2	Sten1	-	-	-	-	-	-	-	-
AX-147208349	Aradu.A01	3441950	Sten2	-	-	-	-	-	-	-	-	-	-	-	-	-	-	-	-	-	-	Sten1	-	Sten1	-	Sten1	-	Sten1	-	-	-	Sten1	-	Sten1	-	Sten1	-	Sten1	-	Sten2	Sten1	-	-	-	-	-	-	-	-
AX-147208356	Aradu.A01	3454654	Sten1	-	-	-	-	-	-	-	-	-	-	-	-	-	-	-	-	-	-	Sten1	-	Sten1	-	Sten1	-	Sten1	-	-	-	Sten1	-	Sten1	-	Sten1	-	Sten1	-	Sten1	Sten1	-	-	-	-	-	-	-	-
AX-147265768	Aradu.A01	3460850	Sten2	-	-	-	-	-	-	-	-	-	-	-	-	-	-	-	-	-	-	Sten1	-	Sten1	-	Sten1	-	Sten1	-	-	-	Sten1	-	Sten1	-	Sten1	-	Sten1	-	-	Sten1	-	-	-	-	-	-	-	-
AX-147208366	Aradu.A01	3462248	Sten2	-	-	-	-	-	-	-	-	-	-	-	-	-	-	-	-	-	-	Sten1	-	Sten1	-	Sten1	-	Sten1	-	Sten2	-	Sten1	-	Sten1	-	Sten1	-	Sten1	-	Sten2	Sten1	-	-	-	-	-	-	-	-
AX-147208411	Aradu.A01	3611395	Sten2	-	-	-	-	-	-	-	-	-	-	-	-	-	-	-	-	-	-	-	-	-	-	-	-	-	-	-	-	-	-	-	-	-	-	-	-	-	-	-	-	-	-	-	-	-	-
AX-147208422	Aradu.A01	3665567	Sten2	-	-	-	-	-	-	-	-	-	-	-	-	-	-	-	-	-	-	-	-	-	-	-	-	-	-	-	-	-	-	-	-	-	-	-	-	-	-	-	-	-	-	-	-	-	-
AX-176819154	Aradu.A01	3750316	Sten2	-	-	-	-	-	-	-	-	-	-	-	-	-	-	-	-	-	-	-	-	-	-	-	-	-	-	-	-	-	-	-	-	-	-	-	-	-	-	-	-	-	-	-	-	-	-
AX-147208456	Aradu.A01	3845309	Sten2	-	-	-	-	-	-	-	-	-	-	-	-	-	-	-	-	-	-	-	-	-	-	-	-	-	-	-	-	-	-	-	-	-	-	-	-	-	-	-	-	-	-	-	-	-	-
AX-147208459	Aradu.A01	3857470	Sten2	-	-	-	-	-	-	-	-	-	-	-	-	-	-	-	-	-	-	-	-	-	-	-	-	-	-	-	-	-	-	-	-	-	-	-	-	-	-	-	-	-	-	-	-	-	-
AX-147208462	Aradu.A01	3864763	Sten2	-	-	-	-	-	-	-	-	-	-	-	-	-	-	-	-	-	-	-	-	-	-	-	-	-	-	-	-	-	-	-	-	-	-	-	-	-	-	-	-	-	-	-	-	-	-
AX-147208477	Aradu.A01	3947660	Sten2	-	-	-	-	-	-	-	-	-	-	-	-	-	-	-	-	-	-	-	-	-	Sten1	-	-	-	-	-	-	-	-	-	-	-	-	-	-	-	-	-	-	-	-	-	-	-	-
AX-147208481	Aradu.A01	3986510	Sten2	-	-	-	-	-	-	-	-	-	-	-	-	-	-	-	-	-	-	-	-	-	-	-	-	-	-	-	-	-	-	-	-	-	-	-	-	-	-	-	-	-	-	-	-	-	-
AX-147208523	Aradu.A01	4143724	Sten2	-	-	-	-	-	-	-	-	-	-	-	-	-	-	-	-	-	-	-	-	-	-	-	-	-	-	-	-	-	-	-	-	-	-	-	-	-	-	-	-	-	-	-	-	-	-
AX-176791360	Aradu.A01	4147264	Sten1	-	-	-	-	-	-	-	-	-	-	-	-	-	-	-	-	-	-	-	-	-	-	-	-	-	-	-	-	-	-	-	-	-	-	-	-	-	-	-	-	-	-	-	-	-	-
AX-147208570	Aradu.A01	4472019	Sten2	-	-	-	-	-	-	-	-	-	-	-	-	-	-	-	-	-	-	-	-	-	-	-	-	-	-	-	-	-	-	-	-	-	-	-	-	-	-	-	-	-	-	-	-	-	-
AX-147208592	Aradu.A01	4568812	Sten2	-	-	-	-	-	-	-	-	-	-	-	-	-	-	-	-	-	-	-	-	-	-	-	-	-	-	-	-	-	-	-	-	-	-	-	-	-	-	-	-	-	-	-	-	-	-
AX-147208614	Aradu.A01	4678382	Sten2	-	-	-	-	-	-	-	-	-	-	-	-	-	-	-	-	-	-	-	-	-	-	-	-	-	-	-	-	-	-	-	-	-	-	-	-	-	-	-	-	-	-	-	-	-	-
AX-147237795	Aradu.A01	4889328	-	-	-	-	-	-	-	-	-	-	-	-	-	-	-	-	-	-	-	-	-	-	-	-	-	-	-	-	-	-	-	-	-	-	-	-	-	-	-	-	-	-	-	-	-	-	-
AX-147208650	Aradu.A01	4901872	Sten1	-	-	-	-	-	-	-	-	-	-	-	-	-	-	-	-	-	-	-	-	-	-	-	-	-	-	-	-	-	-	-	-	-	-	-	-	-	-	-	-	-	-	-	-	-	-
AX-147208681	Aradu.A01	4956444	Sten1	-	-	-	-	-	-	-	-	-	-	-	-	-	-	-	-	-	-	-	-	-	-	-	-	-	-	-	-	-	-	-	-	-	-	-	-	-	-	-	-	-	-	-	-	-	-
AX-147208686	Aradu.A01	4971720	Sten2	-	-	-	-	-	-	-	-	-	-	-	-	-	-	-	-	-	-	-	-	-	-	-	-	-	-	-	-	-	-	-	-	-	-	-	-	-	-	-	-	-	-	-	-	-	-
AX-147208687	Aradu.A01	4971756	Sten2	-	-	-	-	-	-	-	-	-	-	-	-	-	-	-	-	-	-	-	-	-	-	-	-	-	-	-	-	-	-	-	-	-	-	-	-	-	-	-	-	-	-	-	-	-	-
AX-176815649	Aradu.A01	5361582	Sten1	-	-	-	-	-	-	-	-	-	-	-	-	-	-	-	-	-	-	-	-	-	-	-	-	-	-	-	-	-	-	-	-	-	-	-	-	-	-	-	-	-	-	-	-	-	-
AX-147208809	Aradu.A01	5589971	Sten2	-	-	-	-	-	-	-	-	-	-	-	-	-	-	-	-	-	-	-	-	-	-	-	-	-	-	-	-	-	-	-	-	-	-	-	-	-	-	-	-	-	-	-	-	-	-
AX-176822429	Aradu.A01	6096023	Sten1	-	-	-	-	-	-	-	-	-	-	-	-	-	-	-	-	-	-	-	-	-	-	-	-	-	-	-	-	-	-	-	-	-	-	-	-	-	-	-	-	-	-	-	-	-	-
AX-147208902	Aradu.A01	6200658	Sten2	-	-	-	-	-	-	-	-	-	-	-	-	-	-	-	-	-	-	-	-	-	-	-	-	-	-	-	-	-	-	-	-	-	-	-	-	-	-	-	-	-	-	-	-	-	-
AX-147208929	Aradu.A01	6337729	Sten2	-	-	-	-	-	-	-	-	-	-	-	-	-	-	-	-	-	-	-	-	-	-	-	-	-	-	-	-	-	-	-	-	-	-	-	-	-	-	-	-	-	-	-	-	-	-
AX-147208979	Aradu.A01	6679029	Sten2	-	-	-	-	-	-	-	-	-	-	-	-	-	-	-	-	-	-	-	-	-	-	-	-	-	-	-	-	-	-	-	-	-	-	-	-	-	-	-	-	-	-	-	-	-	-
AX-147208980	Aradu.A01	6679084	Sten2	-	-	-	-	-	-	-	-	-	-	-	-	-	-	-	-	-	-	-	-	-	-	-	-	-	-	-	-	-	-	-	-	-	-	-	-	-	-	-	-	-	-	-	-	-	-
AX-147208981	Aradu.A01	6679326	Sten2	-	-	-	-	-	-	-	-	-	-	-	-	-	-	-	-	-	-	-	-	-	-	-	-	-	-	-	-	-	-	-	-	-	-	-	-	-	-	-	-	-	-	-	-	-	-
AX-147208984	Aradu.A01	6679617	Sten2	-	-	-	-	-	-	-	-	-	-	-	-	-	-	-	-	-	-	-	-	-	-	-	-	-	-	-	-	-	-	-	-	-	-	-	-	-	-	-	-	-	-	-	-	-	-
AX-147209001	Aradu.A01	6794484	Sten1	-	-	-	-	-	-	-	-	-	-	-	-	-	-	-	-	-	-	-	-	-	-	-	-	-	-	-	-	-	-	-	-	-	-	-	-	-	-	-	-	-	-	-	-	-	-
AX-147209005	Aradu.A01	6797615	Sten1	-	-	-	-	-	-	-	-	-	-	-	-	-	-	-	-	-	-	-	-	-	-	-	-	-	-	-	-	-	-	-	-	-	-	-	-	-	-	-	-	-	-	-	-	-	-
AX-147209034	Aradu.A01	6921211	Sten1	-	-	-	-	-	-	-	-	-	-	-	-	-	-	-	-	-	-	-	-	-	-	-	-	-	-	-	-	-	-	-	-	-	-	-	-	-	-	-	-	-	-	-	-	-	-
AX-147209047	Aradu.A01	7002818	Sten1	-	-	-	-	-	-	-	-	-	-	-	-	-	-	-	-	-	-	-	-	-	-	-	-	-	-	-	-	-	-	-	-	-	-	-	-	-	-	-	-	-	-	-	-	-	-
AX-147209077	Aradu.A01	7260675	Sten1	-	-	-	-	-	-	-	-	-	-	-	-	-	-	-	-	-	-	-	-	-	-	-	-	-	-	-	-	-	-	-	-	-	-	-	-	-	-	-	-	-	-	-	-	-	-
AX-147209151	Aradu.A01	7778025	Sten1	-	-	-	-	-	-	-	-	-	-	-	-	-	-	-	-	-	-	-	-	-	-	-	-	-	-	-	-	-	-	-	-	-	-	-	-	-	-	-	-	-	-	-	-	-	-
AX-147209153	Aradu.A01	7778389	Sten1	-	-	-	-	-	-	-	-	-	-	-	-	-	-	-	-	-	-	-	-	-	-	-	-	-	-	-	-	-	-	-	-	-	-	-	-	-	-	-	-	-	-	-	-	-	-
AX-147209175	Aradu.A01	7840794	Sten1	-	-	-	-	-	-	-	-	-	-	-	-	-	-	-	-	-	-	-	-	-	-	-	-	-	-	-	-	-	-	-	-	-	-	-	-	-	-	-	-	-	-	-	-	-	-
AX-147209197	Aradu.A01	8070919	-	-	-	-	-	-	-	-	-	-	-	-	-	-	-	-	-	-	-	-	-	-	-	-	-	-	-	-	-	-	-	-	-	-	-	-	-	-	-	-	-	-	-	-	-	-	-
AX-147209275	Aradu.A01	8318086	Sten1	-	-	-	-	-	-	-	-	-	-	-	-	-	-	-	-	-	-	-	-	-	-	-	-	-	-	-	-	-	-	-	-	-	-	-	-	-	-	-	-	-	-	-	-	-	-
AX-147209294	Aradu.A01	8483088	-	-	-	-	-	-	-	-	-	-	-	-	-	-	-	-	-	-	-	-	-	-	-	-	-	-	-	-	-	-	-	-	-	-	-	-	-	-	-	-	-	-	-	-	-	-	-
AX-176816188	Aradu.A01	8785306	Sten1	-	-	-	-	-	-	-	-	-	-	-	-	-	-	-	-	-	-	-	-	-	-	-	-	-	-	-	-	-	-	-	-	-	-	-	-	-	-	-	-	-	-	-	-	-	-
AX-147209356	Aradu.A01	8944361	Sten1	-	-	-	-	-	-	-	-	-	-	-	-	-	-	-	-	-	-	-	-	-	-	-	-	-	-	-	-	-	-	-	-	-	-	-	-	-	-	-	-	-	-	-	-	-	-
AX-147209529	Aradu.A01	9601661	Sten1	-	-	-	-	-	-	-	-	-	-	-	-	-	-	-	-	-	-	-	-	-	-	-	-	-	-	-	-	-	-	-	-	-	-	-	-	-	-	-	-	-	-	-	-	-	-
AX-147209535	Aradu.A01	9616542	Sten1	-	-	-	-	-	-	-	-	-	-	-	-	-	-	-	-	-	-	-	-	-	-	-	-	-	-	-	-	-	-	-	-	-	-	-	-	-	-	-	-	-	-	-	-	-	-
AX-147209562	Aradu.A01	9683595	Sten1	-	-	-	-	-	-	-	-	-	-	-	-	-	-	-	-	-	-	-	-	-	-	-	-	-	-	-	-	-	-	-	-	-	-	-	-	-	-	-	-	-	-	-	-	-	-
AX-147209569	Aradu.A01	9732844	Sten1	-	-	-	-	-	-	-	-	-	-	-	-	-	-	-	-	-	-	-	-	-	-	-	-	-	-	-	-	-	-	-	-	-	-	-	-	-	-	-	-	-	-	-	-	-	-
AX-176794379	Aradu.A01	9851850	Sten1	-	Sten1	-	-	-	-	-	-	-	-	-	-	-	-	-	-	-	-	-	-	-	-	-	-	-	-	-	-	-	-	-	-	-	-	-	-	-	-	-	-	-	-	-	-	-	-
AX-147209744	Aradu.A01	10362840	Sten1	-	-	-	-	-	-	-	-	-	-	-	-	-	-	-	-	-	-	-	-	-	-	-	-	-	-	-	-	-	-	-	-	-	-	-	-	-	-	-	-	-	-	-	-	-	-
AX-147209746	Aradu.A01	10363537	Sten1	-	-	-	-	-	-	-	-	-	-	-	-	-	-	-	-	-	-	-	-	-	-	-	-	-	-	-	-	-	-	-	-	-	-	-	-	-	-	-	-	-	-	-	-	-	-
AX-147209750	Aradu.A01	10368213	Sten1	-	-	-	-	-	-	-	-	-	-	-	-	-	-	-	-	-	-	-	-	-	-	-	-	-	-	-	-	-	-	-	-	-	-	-	-	-	-	-	-	-	-	-	-	-	-
AX-147209768	Aradu.A01	10400343	Sten1	-	-	-	-	-	-	-	-	-	-	-	-	-	-	-	-	-	-	-	-	-	-	-	-	-	-	-	-	-	-	-	-	-	-	-	-	-	-	-	-	-	-	-	-	-	-
AX-147209871	Aradu.A01	10877830	Sten1	-	-	-	-	-	-	-	-	-	-	-	-	-	-	-	-	-	-	-	-	-	-	-	-	-	-	-	-	-	-	-	-	-	-	-	-	-	-	-	-	-	-	-	-	-	-
AX-147209889	Aradu.A01	10951447	-	-	-	-	-	-	-	-	-	-	-	-	-	-	-	-	-	-	-	-	-	-	-	-	-	-	-	-	-	-	-	-	-	-	-	-	-	-	-	-	-	-	-	-	-	-	-
AX-147209909	Aradu.A01	11117619	Sten1	-	-	-	-	-	-	-	-	-	-	-	-	-	-	-	-	-	-	-	-	-	-	-	-	-	-	-	-	-	-	-	-	-	-	-	-	-	-	-	-	-	-	-	-	-	-
AX-147209955	Aradu.A01	11376476	Sten1	-	-	-	-	-	-	-	-	-	-	-	-	-	-	-	-	-	-	-	-	-	-	-	-	-	-	-	-	-	-	-	-	-	-	-	-	-	-	-	-	-	-	-	-	-	-
AX-147209957	Aradu.A01	11401844	Sten1	-	-	-	-	-	-	-	-	-	-	-	-	-	-	-	-	-	-	-	-	-	-	-	-	-	-	-	-	-	-	-	-	-	-	-	-	-	-	-	-	-	-	-	-	-	-
AX-147209959	Aradu.A01	11416797	-	-	-	-	-	-	-	-	-	-	-	-	-	-	-	-	-	-	-	-	-	-	-	-	-	-	-	-	-	-	-	-	-	-	-	-	-	-	-	-	-	-	-	-	-	-	-
AX-147209963	Aradu.A01	11604414	Sten1	-	-	-	-	-	-	-	-	-	-	-	-	-	-	-	-	-	-	-	-	-	-	-	-	-	-	-	-	-	-	-	-	-	-	-	-	-	-	-	-	-	-	-	-	-	-
AX-147209973	Aradu.A01	11617268	Sten1	-	-	-	-	-	-	-	-	-	-	-	-	-	-	-	-	-	-	-	-	-	-	-	-	-	-	-	-	-	-	-	-	-	-	-	-	-	-	-	-	-	-	-	-	-	-
AX-147209994	Aradu.A01	11756006	Sten1	-	-	-	-	-	-	-	-	-	-	-	-	-	-	-	-	-	-	-	-	-	-	-	-	-	-	-	-	-	-	-	-	-	-	-	-	-	-	-	-	-	-	-	-	-	-
AX-147210007	Aradu.A01	11796164	Sten1	-	-	-	-	-	-	-	-	-	-	-	-	-	-	-	-	-	-	-	-	-	-	-	-	-	-	-	-	-	-	-	-	-	-	-	-	-	-	-	-	-	-	-	-	-	-
AX-147210038	Aradu.A01	11922479	Sten1	-	-	-	-	-	-	-	-	-	-	-	-	-	-	-	-	-	-	-	-	-	-	-	-	-	-	-	-	-	-	-	-	-	-	-	-	-	-	-	-	-	-	-	-	-	-
AX-147210045	Aradu.A01	11971012	Sten1	-	-	-	-	-	-	-	-	-	-	-	-	-	-	-	-	-	-	-	-	-	-	-	-	-	-	-	-	-	-	-	-	-	-	-	-	-	-	-	-	-	-	-	-	-	-
AX-147210055	Aradu.A01	12011768	Sten1	-	-	-	-	-	-	-	-	-	-	-	-	-	-	-	-	-	-	-	-	-	-	-	-	-	-	-	-	-	-	-	-	-	-	-	-	-	-	-	-	-	-	-	-	-	-
AX-147210114	Aradu.A01	12593839	-	-	-	-	-	-	-	-	-	-	-	-	-	-	-	-	-	-	-	-	-	-	-	-	-	-	-	-	-	-	-	-	-	-	-	-	-	-	-	-	-	-	-	-	-	-	-
AX-147210119	Aradu.A01	12610918	Sten1	-	-	-	-	-	-	-	-	-	-	-	-	-	-	-	-	-	-	-	-	-	-	-	-	-	-	-	-	-	-	-	-	-	-	-	-	-	-	-	-	-	-	-	-	-	-
AX-147210159	Aradu.A01	13507905	Sten1	-	-	-	-	-	-	-	-	-	-	-	-	-	-	-	-	-	-	-	-	-	-	-	-	-	-	-	-	-	-	-	-	-	-	-	-	-	-	-	-	-	-	-	-	-	-
AX-176818117	Aradu.A01	13788537	Sten1	-	-	-	-	-	-	-	-	-	-	-	-	-	-	-	-	-	-	-	-	-	-	-	-	-	-	-	-	-	-	-	-	-	-	-	-	-	-	-	-	-	-	-	-	-	-
AX-147210176	Aradu.A01	14044091	Sten1	-	-	-	-	-	-	-	-	-	-	-	-	-	-	-	-	-	-	-	-	-	-	-	-	-	-	-	-	-	-	-	-	-	-	-	-	-	-	-	-	-	-	-	-	-	-
AX-147210198	Aradu.A01	14652715	Sten1	-	-	-	-	-	-	-	-	-	-	-	-	-	-	-	-	-	-	-	-	-	-	-	-	-	-	-	-	-	-	-	-	-	-	-	-	-	-	-	-	-	-	-	-	-	-
AX-147210210	Aradu.A01	14895529	Sten1	-	-	-	-	-	-	-	-	-	-	-	-	-	-	-	-	-	-	-	-	-	-	-	-	-	-	-	-	-	-	-	-	-	-	-	-	-	-	-	-	-	-	-	-	-	-
AX-147210213	Aradu.A01	14897407	Sten1	-	-	-	-	-	-	-	-	-	-	-	-	-	-	-	-	-	-	-	-	-	-	-	-	-	-	-	-	-	-	-	-	-	-	-	-	-	-	-	-	-	-	-	-	-	-
AX-147210224	Aradu.A01	15260506	Sten1	-	-	-	-	-	-	-	-	-	-	-	-	-	-	-	-	-	-	-	-	-	-	-	-	-	-	-	-	-	-	-	-	-	-	-	-	-	-	-	-	-	-	-	-	-	-
AX-176808514	Aradu.A01	18623658	-	-	-	-	-	-	-	-	-	-	-	-	-	-	-	-	-	-	-	-	-	-	Sten1	-	-	-	-	-	-	-	-	-	-	-	-	-	-	-	-	-	-	-	-	-	-	-	-
AX-147210352	Aradu.A01	18638406	-	-	-	-	-	-	-	-	-	-	-	-	-	-	-	-	-	-	-	-	-	-	-	-	-	-	-	-	-	-	-	-	-	-	-	-	-	-	-	-	-	-	-	-	-	-	-
AX-147210367	Aradu.A01	19089187	Sten1	-	-	-	-	-	-	-	-	-	-	-	-	-	-	-	-	-	-	-	-	-	-	-	-	-	-	-	-	-	-	-	-	-	-	-	-	-	-	-	-	-	-	-	-	-	-
AX-147210375	Aradu.A01	19206589	Sten1	-	-	-	-	-	-	-	-	-	-	-	-	-	-	-	-	-	-	-	-	-	-	-	-	-	-	-	-	-	-	-	-	-	-	-	-	-	-	-	-	-	-	-	-	-	-
AX-147210408	Aradu.A01	19878466	Sten1	-	-	-	-	-	-	-	-	-	-	-	-	-	-	-	-	-	-	-	-	-	-	-	-	-	-	-	-	-	-	-	-	-	-	-	-	-	-	-	-	-	-	-	-	-	-
AX-147210422	Aradu.A01	20832856	Sten1	-	-	-	-	-	-	-	-	-	-	-	-	-	-	-	-	-	-	-	-	-	-	-	-	-	-	-	-	-	-	-	-	-	-	-	-	-	-	-	-	-	-	-	-	-	-
AX-147210423	Aradu.A01	20833213	Sten1	-	-	-	-	-	-	-	-	-	-	-	-	-	-	-	-	-	-	-	-	-	-	-	-	-	-	-	-	-	-	-	-	-	-	-	-	-	-	-	-	-	-	-	-	-	-
AX-176814898	Aradu.A01	21197428	-	-	-	-	-	-	-	-	-	-	-	-	-	-	-	-	-	-	-	-	-	-	-	-	-	-	-	-	-	-	-	-	-	-	-	-	-	-	-	-	-	-	-	-	-	-	-
AX-147210432	Aradu.A01	21307983	Sten1	-	-	-	-	-	-	-	-	-	-	-	-	-	-	-	-	-	-	-	-	-	-	-	-	-	-	-	-	-	-	-	-	-	-	-	-	-	-	-	-	-	-	-	-	-	-
AX-147210437	Aradu.A01	21309019	Sten1	-	-	-	-	-	-	-	-	-	-	-	-	-	-	-	-	-	-	-	-	-	-	-	-	-	-	-	-	-	-	-	-	-	-	-	-	-	-	-	-	-	-	-	-	-	-
AX-147210510	Aradu.A01	23821551	Sten1	-	-	-	-	-	-	-	-	-	-	-	-	-	-	-	-	-	-	-	-	-	-	-	-	-	-	-	-	-	-	-	-	-	-	-	-	-	-	-	-	-	-	-	-	-	-
AX-176798300	Aradu.A01	27224705	Sten1	-	-	-	-	-	-	-	-	-	-	-	-	-	-	-	-	-	-	-	-	-	-	-	-	-	-	-	-	-	-	-	-	-	-	-	-	-	-	-	-	-	-	-	-	-	-
AX-176794364	Aradu.A01	27229920	Sten1	-	-	-	-	-	-	-	-	-	-	-	-	-	-	-	-	-	-	-	-	-	-	-	-	-	-	-	-	-	-	-	-	-	-	-	-	-	-	-	-	-	-	-	-	-	-
AX-147210581	Aradu.A01	27742158	Sten1	-	-	-	-	-	-	-	-	-	-	-	-	-	-	-	-	-	-	-	-	-	-	-	-	-	-	-	-	-	-	-	-	-	-	-	-	-	-	-	-	-	-	-	-	-	-
AX-147210595	Aradu.A01	28149031	Sten1	-	-	-	-	-	-	-	-	-	-	-	-	-	-	-	-	-	-	-	-	-	-	-	-	-	-	-	-	-	-	-	-	-	-	-	-	-	-	-	-	-	-	-	-	-	-
AX-176791728	Aradu.A01	28191856	Sten1	-	-	-	-	-	-	-	-	-	-	-	-	-	-	-	-	-	-	-	-	-	-	-	-	-	-	-	-	-	-	-	-	-	-	-	-	-	-	-	-	-	-	-	-	-	-
AX-147210648	Aradu.A01	29419297	Sten1	-	-	-	-	-	-	-	-	-	-	-	-	-	-	-	-	-	-	-	-	-	-	-	-	-	-	-	-	-	-	-	-	-	-	-	-	-	-	-	-	-	-	-	-	-	-
AX-176807364	Aradu.A01	29554862	-	-	-	-	-	-	-	-	-	-	-	-	-	-	-	-	-	-	-	-	-	-	-	-	-	-	-	-	-	-	-	-	-	-	-	-	-	-	-	-	-	-	-	-	-	-	-
AX-176820201	Aradu.A01	29854378	-	Sten2	Sten2	Sten2	Sten1	Sten2	-	Sten2	-	Sten2	Sten2	Sten2	Sten1	Sten2	Sten2	Sten2	Sten2	Sten2	Sten2	-	Sten2	-	Sten2	Sten2	Sten2	Sten2	Sten2	Sten2	Sten2	Sten2	Sten2	Sten2	Sten2	Sten1	Sten2	Sten2	Sten2	Sten2	Sten2	Sten2	Sten1	Sten2	Sten2	Sten2	Sten2	Sten2	Sten1
AX-147210668	Aradu.A01	30348130	Sten1	-	-	-	-	-	-	-	-	-	-	-	-	-	-	-	-	-	-	-	-	-	-	-	-	-	-	-	-	-	-	-	-	-	-	-	-	-	-	-	-	-	-	-	-	-	-
AX-147210685	Aradu.A01	30700040	Sten1	-	-	-	-	-	-	-	-	-	-	-	-	-	-	-	-	-	-	-	-	-	-	-	-	-	-	-	-	-	-	-	-	-	-	-	-	-	-	-	-	-	-	-	-	-	-
AX-147210754	Aradu.A01	32558513	Sten1	-	-	-	-	-	-	-	-	-	-	-	-	-	-	-	-	-	-	-	-	-	-	-	-	-	-	-	-	-	-	-	-	-	-	-	-	-	-	-	-	-	-	-	-	-	-
AX-147210868	Aradu.A01	36142331	Sten1	-	-	-	-	-	-	-	-	-	-	-	-	-	-	-	-	-	-	-	-	-	-	-	-	-	-	-	-	-	-	-	-	-	-	-	-	-	-	-	-	-	-	-	-	-	-
AX-147210954	Aradu.A01	37971393	Sten1	-	-	-	-	-	-	-	-	-	-	-	-	-	-	-	-	-	-	-	-	-	-	-	-	-	-	-	-	-	-	-	-	-	-	-	-	-	-	-	-	-	-	-	-	-	-
AX-176798181	Aradu.A01	39534179	Sten1	-	-	-	-	-	-	-	-	-	-	-	-	-	-	-	-	-	-	-	-	-	-	-	-	-	-	-	-	-	-	-	-	-	-	-	-	-	-	-	-	-	-	-	-	-	-
AX-176808205	Aradu.A01	42380436	-	-	-	-	-	-	-	-	-	-	-	-	-	-	-	-	-	-	-	-	-	-	-	-	-	-	-	-	-	-	-	-	-	-	-	-	-	-	-	-	-	-	-	-	-	-	-
AX-147211025	Aradu.A01	42972504	Sten1	-	-	-	-	-	-	-	-	-	-	-	-	-	-	-	-	-	-	-	-	-	-	-	-	-	-	-	-	-	-	-	-	-	-	-	-	-	-	-	-	-	-	-	-	-	-
AX-147211069	Aradu.A01	44307659	Sten1	-	-	-	-	-	-	-	-	-	-	-	-	-	-	-	-	-	-	-	-	-	-	-	-	-	-	-	-	-	-	-	-	-	-	-	-	-	-	-	-	-	-	-	-	-	-
AX-147211190	Aradu.A01	50181195	Sten1	-	-	-	-	-	-	-	-	-	-	-	-	-	-	-	-	-	-	-	-	-	-	-	-	-	-	-	-	-	-	-	-	-	-	-	-	-	-	-	-	-	-	-	-	-	-
AX-147211193	Aradu.A01	50260433	Sten1	-	-	-	-	-	-	-	-	-	-	-	-	-	-	-	-	-	-	-	-	-	-	-	-	-	-	-	-	-	-	-	-	-	-	-	-	-	-	-	-	-	-	-	-	-	-
AX-147211197	Aradu.A01	50292886	Sten1	-	-	-	-	-	-	-	-	-	-	-	-	-	-	-	-	-	-	-	-	-	-	-	-	-	-	-	-	-	-	-	-	-	-	-	-	-	-	-	-	-	-	-	-	-	-
AX-147211204	Aradu.A01	50383263	Sten1	-	-	-	-	-	-	-	-	-	-	-	-	-	-	-	-	-	-	-	-	-	-	-	-	-	-	-	-	-	-	-	-	-	-	-	-	-	-	-	-	-	-	-	-	-	-
AX-176795399	Aradu.A01	52613972	-	-	-	-	-	Sten1	-	-	-	-	-	-	-	-	-	-	-	-	-	-	-	-	-	-	-	-	-	-	-	-	-	-	-	-	-	-	-	-	-	-	-	-	-	-	-	-	-
AX-147211289	Aradu.A01	54777254	Sten1	-	-	-	-	-	-	-	-	-	-	-	-	-	-	-	-	-	-	-	-	-	-	-	-	-	-	-	-	-	-	-	-	-	-	-	-	-	-	-	-	-	-	-	-	-	-
AX-176797946	Aradu.A01	57140274	-	-	-	-	-	-	-	-	-	-	-	-	-	-	-	-	-	-	-	-	-	-	-	-	-	-	-	-	-	-	-	-	-	-	-	-	-	-	-	-	-	-	-	-	-	-	-
AX-176794462	Aradu.A01	59525000	-	-	-	-	-	-	-	-	-	-	-	-	-	-	-	-	-	-	-	-	-	-	-	-	-	-	-	-	-	-	-	-	-	-	-	-	-	-	-	-	-	-	-	-	-	-	-
AX-176811746	Aradu.A01	59525006	-	-	-	-	-	-	-	-	-	-	-	-	-	-	-	-	-	-	-	-	-	-	-	-	-	-	-	-	-	-	-	-	-	-	-	-	-	-	-	-	-	-	-	-	-	-	-
AX-176796208	Aradu.A01	64429002	Sten1	-	-	-	-	-	-	-	-	-	-	-	-	-	-	-	-	-	-	-	-	-	-	-	-	-	-	-	-	-	-	-	-	-	-	-	-	-	-	-	-	-	-	-	-	-	-
AX-147211452	Aradu.A01	64545109	Sten1	-	-	-	-	-	-	-	-	-	-	-	-	-	-	-	-	-	-	-	-	-	-	-	-	-	-	-	-	-	-	-	-	-	-	-	-	-	-	-	-	-	-	-	-	-	-
AX-176792021	Aradu.A01	67371825	Sten1	-	-	-	-	-	-	-	-	-	-	-	-	-	-	-	-	-	-	-	-	-	-	-	-	-	-	-	-	-	-	-	-	-	-	-	-	-	-	-	-	-	-	-	-	-	-
AX-147211516	Aradu.A01	70251849	Sten1	-	-	-	-	-	-	-	-	-	-	-	-	-	-	-	-	-	-	-	-	-	-	-	-	-	-	-	-	-	-	-	-	-	-	-	-	-	-	-	-	-	-	-	-	-	-
AX-147211616	Aradu.A01	85136940	Sten1	-	-	-	-	-	-	-	-	-	-	-	-	-	-	-	-	-	-	-	-	-	-	-	-	-	-	-	-	-	-	-	-	-	-	-	-	-	-	-	-	-	-	-	-	-	-
AX-176806369	Aradu.A01	85609541	Sten1	-	-	-	-	-	-	-	-	-	-	-	-	-	-	-	-	-	-	-	-	-	-	-	-	-	-	-	-	-	-	-	-	-	-	-	-	-	-	-	-	-	-	-	-	-	-
AX-176820805	Aradu.A01	87053923	-	-	-	-	-	-	-	-	-	-	-	-	-	-	-	-	-	-	-	-	-	-	-	-	-	-	-	-	-	-	-	-	-	-	-	-	-	-	-	-	-	-	-	-	-	-	-
AX-147211618	Aradu.A01	87096975	Sten1	-	-	-	-	-	-	-	-	-	-	-	-	-	-	-	-	-	-	-	-	-	-	-	-	-	-	-	-	-	-	-	-	-	-	-	-	-	-	-	-	-	-	-	-	-	-
AX-176798488	Aradu.A01	87187940	Sten1	-	-	-	-	-	-	-	-	-	-	-	-	-	-	-	-	-	-	-	-	-	-	-	-	-	-	-	-	-	-	-	-	-	-	-	-	-	-	-	-	-	-	-	-	-	-
AX-147211653	Aradu.A01	89680568	-	-	-	-	-	-	-	-	-	-	-	-	-	-	-	-	-	-	-	-	-	-	-	-	-	-	-	-	-	-	-	-	-	-	-	-	-	-	-	-	-	-	-	-	-	-	-
AX-147211655	Aradu.A01	89685851	Sten1	-	-	-	-	-	-	-	-	-	-	-	-	-	-	-	-	-	-	-	-	-	-	-	-	-	-	-	-	-	-	-	-	-	-	-	-	-	-	-	-	-	-	-	-	-	-
AX-147211698	Aradu.A01	91743419	Sten1	-	-	-	-	-	-	-	-	-	-	-	-	-	-	-	-	-	-	-	-	-	-	-	-	-	-	-	-	-	-	-	-	-	-	-	-	-	-	-	-	-	-	-	-	-	-
AX-147211714	Aradu.A01	92478990	Sten1	-	-	-	-	-	-	-	-	-	-	-	-	-	-	-	-	-	-	-	-	-	-	-	-	-	-	-	-	-	-	-	-	-	-	-	-	-	-	-	-	-	-	-	-	-	-
AX-147211718	Aradu.A01	92596134	Sten2	-	-	-	-	-	-	-	-	-	-	-	-	-	-	-	-	-	-	-	-	-	-	-	-	-	-	-	-	-	-	-	-	-	-	-	-	-	-	-	-	-	-	-	-	-	-
AX-147211790	Aradu.A01	94844203	Sten2	-	-	-	-	-	-	-	-	-	-	-	-	-	-	-	-	-	-	-	-	-	-	-	-	-	-	-	-	-	-	-	-	-	-	-	-	-	-	-	-	-	-	-	-	-	-
AX-147211796	Aradu.A01	94937390	Sten2	-	-	-	-	-	-	-	-	-	-	-	-	-	-	-	-	-	-	-	-	-	-	-	-	-	-	-	-	-	-	-	-	-	-	-	-	-	-	-	-	-	-	-	-	-	-
AX-147211814	Aradu.A01	95704657	Sten2	-	-	-	-	-	-	-	-	-	-	-	-	-	-	-	-	-	-	-	-	-	-	-	-	-	-	-	-	-	-	-	-	-	-	-	-	-	-	-	-	-	-	-	-	-	-
AX-147211853	Aradu.A01	96982501	Sten1	-	-	-	-	-	-	-	-	-	-	-	-	-	-	-	-	-	-	-	-	-	-	-	-	-	-	-	-	-	-	-	-	-	-	-	-	-	-	-	-	-	-	-	-	-	-
AX-147211860	Aradu.A01	97205940	Sten2	-	-	-	-	-	-	-	-	-	-	-	-	-	-	-	-	-	-	-	-	-	-	-	-	-	-	-	-	-	-	-	-	-	-	-	-	-	-	-	-	-	-	-	-	-	-
AX-176801835	Aradu.A01	97347534	Sten1	-	-	-	-	-	-	-	-	-	-	-	-	-	-	-	-	-	-	-	-	-	-	-	-	-	-	-	-	-	-	-	-	-	-	-	-	-	-	-	-	-	-	-	-	-	-
AX-176810594	Aradu.A01	97504048	Sten1	-	-	-	-	-	-	-	-	-	-	-	-	-	-	-	-	-	-	-	-	-	-	-	-	-	-	-	-	-	-	-	-	-	-	-	-	-	-	-	-	-	-	-	-	-	-
AX-147211869	Aradu.A01	97988649	Sten1	-	-	-	-	-	-	-	-	-	-	-	-	-	-	-	-	-	-	-	-	-	-	-	-	-	-	-	-	-	-	-	-	-	-	-	-	-	-	-	-	-	-	-	-	-	-
AX-147211886	Aradu.A01	98852433	Sten2	-	-	-	-	-	-	-	-	-	-	-	-	-	-	-	-	-	-	-	-	-	-	-	-	-	-	-	-	-	-	-	-	-	-	-	-	-	-	-	-	-	-	-	-	-	-
AX-176810885	Aradu.A01	99425091	-	-	-	-	-	-	-	-	-	-	-	-	-	-	-	-	-	-	-	-	-	-	-	-	-	-	-	-	-	-	-	-	-	-	-	-	-	-	-	-	-	-	-	-	-	-	-
AX-147211900	Aradu.A01	99546596	Sten2	-	-	-	-	-	-	-	-	-	-	-	-	-	-	-	-	-	-	-	-	-	-	-	-	-	-	-	-	-	-	-	-	-	-	-	-	-	-	-	-	-	-	-	-	-	-
AX-147211923	Aradu.A01	100291833	Sten2	-	-	-	Sten1	-	-	-	Sten1	-	-	-	Sten1	-	-	-	Sten1	-	-	-	-	-	-	-	-	-	-	-	-	-	-	-	-	-	-	-	-	-	-	-	-	-	-	-	Sten1	-	-
AX-147211929	Aradu.A01	100451974	Sten2	-	-	-	Sten1	-	-	-	Sten1	-	Sten1	-	Sten1	-	Sten1	-	Sten2	-	-	-	-	-	-	-	-	-	-	-	-	-	-	-	-	-	-	-	-	-	-	-	-	-	-	-	Sten1	-	-
AX-176821405	Aradu.A01	100594409	-	-	-	-	Sten1	-	-	-	Sten1	-	Sten1	-	Sten1	-	Sten1	-	Sten2	-	-	-	-	-	-	-	-	-	-	-	-	-	-	-	-	-	-	-	-	-	-	-	-	-	-	-	Sten1	-	-
AX-147211986	Aradu.A01	102053529	Sten2	-	-	Sten1	-	Sten1	-	-	Sten1	Sten1	Sten1	-	Sten1	Sten2	Sten1	Sten2	Sten1	Sten1	Sten1	-	-	-	Sten1	-	Sten1	-	Sten1	-	-	-	Sten1	-	Sten1	-	-	-	Sten1	-	-	Sten2	-	Sten2	-	Sten1	Sten1	Sten1	-
AX-147211994	Aradu.A01	102165459	Sten2	-	-	Sten1	-	Sten1	-	-	Sten1	Sten1	Sten1	-	Sten1	Sten2	Sten1	Sten2	Sten1	Sten1	Sten1	-	-	-	Sten1	-	Sten1	-	Sten1	-	-	-	Sten1	-	Sten1	-	Sten1	-	Sten1	-	-	Sten2	-	Sten2	-	Sten1	Sten1	Sten1	-
AX-147212014	Aradu.A01	102837904	Sten2	-	-	Sten1	-	Sten1	-	Sten1	Sten2	Sten1	Sten2	-	Sten1	Sten2	Sten1	Sten2	Sten1	Sten1	Sten1	-	-	-	Sten1	-	Sten1	-	Sten1	-	-	-	Sten1	-	Sten1	-	Sten1	-	Sten1	-	-	Sten2	-	Sten2	-	Sten1	Sten1	Sten1	-
AX-176815645	Aradu.A01	103615126	-	-	-	-	-	-	-	-	-	-	-	-	-	-	-	-	-	-	-	-	-	-	-	-	-	-	-	-	-	-	-	-	-	-	-	-	-	-	-	-	-	-	-	-	-	-	-
AX-176822915	Aradu.A01	103666559	-	-	-	-	-	-	-	-	-	-	-	-	-	-	-	-	-	-	-	-	-	-	-	-	-	-	-	-	-	-	-	-	-	-	-	-	-	-	-	-	-	-	-	-	-	-	-
AX-147212041	Aradu.A01	104077042	Sten2	-	-	Sten1	-	Sten1	-	Sten1	Sten2	Sten2	Sten2	-	Sten1	Sten2	Sten1	Sten2	Sten1	Sten1	Sten1	-	-	-	Sten1	-	Sten1	-	Sten1	-	-	-	Sten1	-	Sten1	-	Sten1	-	-	-	-	Sten2	-	Sten2	-	Sten1	Sten1	-	-
AX-176803609	Aradu.A01	104121701	Sten2	-	-	Sten1	-	Sten1	-	Sten1	Sten2	Sten2	-	-	Sten1	Sten2	Sten1	-	Sten1	Sten1	Sten1	-	-	-	-	-	Sten1	-	Sten1	-	-	-	Sten1	-	Sten1	-	Sten1	-	Sten1	-	-	-	-	Sten2	-	Sten1	Sten1	-	-
AX-176792555	Aradu.A01	104855229	Sten2	-	-	Sten1	-	Sten1	-	Sten1	Sten2	Sten2	Sten2	-	Sten1	Sten2	Sten1	Sten2	Sten1	Sten1	Sten2	-	-	-	Sten2	-	Sten1	-	Sten1	-	-	-	Sten1	-	Sten1	-	Sten1	-	Sten2	-	-	Sten1	-	Sten1	-	Sten1	Sten1	-	-
AX-147212065	Aradu.A01	105355893	Sten2	-	-	Sten1	-	Sten1	-	Sten1	Sten2	Sten2	Sten2	-	Sten1	Sten2	Sten1	Sten2	Sten1	Sten1	Sten2	-	-	-	Sten1	-	Sten1	-	Sten1	-	-	-	Sten1	-	Sten1	-	-	-	Sten1	-	-	Sten1	-	Sten1	-	Sten1	Sten1	Sten1	-
AX-147212094	Aradu.A01	106856793	Sten2	-	-	-	-	Sten1	-	Sten1	Sten1	Sten1	Sten1	-	Sten1	Sten1	Sten1	Sten1	Sten1	Sten2	Sten2	-	-	-	Sten1	-	Sten1	-	Sten1	-	-	-	Sten1	-	Sten1	-	-	-	Sten2	-	-	Sten1	-	Sten1	-	Sten1	-	Sten1	-
AX-176823530	Aradu.A02	107155	Sten1	-	-	-	-	-	-	-	-	-	-	-	-	-	-	-	-	-	-	-	-	-	-	-	-	-	-	-	-	-	-	-	-	-	-	-	-	-	-	-	-	-	-	-	-	-	-
AX-147212141	Aradu.A02	174898	Sten2	-	-	-	-	-	-	-	-	-	-	-	-	-	-	-	-	-	-	-	-	-	-	-	-	-	-	-	-	-	-	-	-	-	-	-	-	-	-	-	-	-	-	-	-	-	-
AX-176792377	Aradu.A02	177786	-	-	-	-	-	-	-	-	-	-	-	-	-	-	-	-	-	-	-	-	-	-	-	-	-	-	-	-	-	-	-	-	-	-	-	-	-	-	-	-	-	-	-	-	-	-	-
AX-147212174	Aradu.A02	314196	Sten1	-	-	-	-	-	-	-	-	-	-	-	-	-	-	-	-	-	-	-	-	-	-	-	-	-	-	-	-	-	-	-	-	-	-	-	-	-	-	-	-	-	-	-	-	-	-
AX-147212176	Aradu.A02	327195	Sten1	-	-	-	-	-	-	-	-	-	-	-	-	-	-	-	-	-	-	-	-	-	-	-	-	-	-	-	-	-	-	-	-	-	-	-	-	-	-	-	-	-	-	-	-	-	-
AX-147212177	Aradu.A02	328324	Sten1	-	-	-	-	-	-	-	-	-	-	-	-	-	-	-	-	-	-	-	-	-	-	-	-	-	-	-	-	-	-	-	-	-	-	-	-	-	-	-	-	-	-	-	-	-	-
AX-147212216	Aradu.A02	524914	Sten1	-	-	-	-	-	-	-	-	-	-	-	-	-	-	-	-	-	-	-	-	-	-	-	-	-	-	-	-	-	-	-	-	-	-	-	-	-	-	-	-	-	-	-	-	-	-
AX-177638711	Aradu.A02	524938	-	-	-	-	-	-	-	-	-	-	-	-	-	-	-	-	-	-	-	-	-	-	-	-	-	-	-	-	-	-	-	-	-	-	-	-	-	-	-	-	-	-	-	-	-	-	-
AX-147212220	Aradu.A02	529301	Sten2	-	-	-	-	-	-	-	-	-	-	-	-	-	-	-	-	-	-	-	-	-	-	-	-	-	-	-	-	-	-	-	-	-	-	-	-	-	-	-	-	-	-	-	-	-	-
AX-147260412	Aradu.A02	549740	Sten1	-	-	-	-	-	-	-	-	-	-	-	-	-	-	-	-	-	-	-	-	-	-	-	-	-	-	-	-	-	-	-	-	-	-	-	-	-	-	-	-	-	-	-	-	-	-
AX-176823854	Aradu.A02	610745	Sten1	-	-	-	-	-	-	-	-	-	-	-	-	-	-	-	-	-	-	-	-	-	-	-	-	-	-	-	-	-	-	-	-	-	-	-	-	-	-	-	-	-	-	-	-	-	-
AX-147212305	Aradu.A02	770726	Sten1	-	-	-	-	-	-	-	-	-	-	-	-	-	-	-	-	-	-	-	-	-	-	-	-	-	-	-	-	-	-	-	-	-	-	-	-	-	-	-	-	-	-	-	-	-	-
AX-177637178	Aradu.A02	771251	Sten1	-	-	-	-	-	-	-	-	-	-	-	-	-	-	-	-	-	-	-	-	-	-	-	-	-	-	-	-	-	-	-	-	-	-	-	-	-	-	-	-	-	-	-	-	-	-
AX-147212320	Aradu.A02	805196	Sten2	-	-	-	-	-	-	-	-	-	-	-	-	-	-	-	-	-	-	-	-	-	-	-	-	-	-	-	-	-	-	-	-	-	-	-	-	-	-	-	-	-	-	-	-	-	-
AX-177639193	Aradu.A02	857614	Sten1	-	-	-	-	-	-	-	-	-	-	-	-	-	-	-	-	-	-	-	-	-	-	-	-	-	-	-	-	-	-	-	-	-	-	-	-	-	-	-	-	-	-	-	-	-	-
AX-177638310	Aradu.A02	902287	-	-	-	-	-	-	-	-	-	-	-	-	-	-	-	-	-	-	-	-	-	-	-	-	-	-	-	-	-	-	-	-	-	-	-	-	-	-	-	-	-	-	-	-	-	-	-
AX-177642823	Aradu.A02	902714	-	-	-	-	-	-	-	-	-	-	-	-	-	-	-	-	-	-	-	-	-	-	-	-	-	-	-	-	-	-	-	-	-	-	-	-	-	-	-	-	-	-	-	-	-	-	-
AX-177644248	Aradu.A02	950880	-	-	-	-	-	-	-	-	-	-	-	-	-	-	-	-	-	-	-	-	-	-	-	-	-	-	-	-	-	-	-	-	-	-	-	-	-	-	-	-	-	-	-	-	-	-	-
AX-177637363	Aradu.A02	1078390	Sten1	-	-	-	-	-	-	-	-	-	-	-	-	-	-	-	-	-	-	-	-	-	-	-	-	-	-	-	-	-	-	-	-	-	-	-	-	-	-	-	-	-	-	-	-	-	-
AX-176821132	Aradu.A02	1173968	Sten1	-	-	-	-	-	-	-	-	-	-	-	-	-	-	-	-	-	-	-	-	-	-	-	-	-	-	-	-	-	-	-	-	-	-	-	-	-	-	-	-	-	-	-	-	-	-
AX-147212409	Aradu.A02	1180998	Sten1	-	-	-	-	-	-	-	-	-	-	-	-	-	-	-	-	-	-	-	-	-	-	-	-	-	-	-	-	-	-	-	-	-	-	-	-	-	-	-	-	-	-	-	-	-	-
AX-176819339	Aradu.A02	1200821	Sten1	-	-	-	-	-	-	-	-	-	-	-	-	-	-	-	-	-	-	-	-	-	-	-	-	-	-	-	-	-	-	-	-	-	-	-	-	-	-	-	-	-	-	-	-	-	-
AX-147212428	Aradu.A02	1225369	Sten1	-	-	-	-	-	-	-	-	-	-	-	-	-	-	-	-	-	-	-	-	-	-	-	-	-	-	-	-	-	-	-	-	-	-	-	-	-	-	-	-	-	-	-	-	-	-
AX-147212463	Aradu.A02	1333411	Sten1	-	-	-	-	-	-	-	-	-	-	-	-	-	-	-	-	-	-	-	-	-	-	-	-	-	-	-	-	-	-	-	-	-	-	-	-	-	-	-	-	-	-	-	-	-	-
AX-176823317	Aradu.A02	1444372	Sten1	-	-	-	-	-	-	-	-	-	-	-	-	-	-	-	-	-	-	-	-	-	-	-	-	-	-	-	-	-	-	-	-	-	-	-	-	-	-	-	-	-	-	-	-	-	-
AX-147212511	Aradu.A02	1556477	Sten1	-	-	-	-	-	-	-	-	-	-	-	-	-	-	-	-	-	-	-	-	-	-	-	-	-	-	-	-	-	-	-	-	-	-	-	-	-	-	-	-	-	-	-	-	-	-
AX-177637135	Aradu.A02	1756905	-	-	-	-	-	-	-	-	-	-	-	-	-	-	-	-	-	-	-	-	-	-	-	-	-	-	-	-	-	-	-	-	-	-	-	-	-	-	-	-	-	-	-	-	-	-	-
AX-176821270	Aradu.A02	1795704	Sten1	-	-	-	-	-	-	-	-	-	-	-	-	-	-	-	-	-	-	-	-	-	-	-	-	-	-	-	-	-	-	-	-	-	-	-	-	-	-	-	-	-	-	-	-	-	-
AX-176820678	Aradu.A02	2413776	Sten2	-	-	-	-	-	-	-	-	-	-	-	-	-	-	-	-	-	-	-	-	-	-	-	-	-	-	-	-	-	-	-	-	-	-	-	-	-	-	-	-	-	-	-	-	-	-
AX-147240119	Aradu.A02	2483357	Sten2	-	-	-	-	-	-	-	-	-	-	-	-	-	-	-	-	-	-	-	-	-	-	-	-	-	-	-	-	-	-	-	-	-	-	-	-	-	-	-	-	-	-	-	-	-	-
AX-176822484	Aradu.A02	2495254	Sten1	-	-	-	-	-	-	-	-	-	-	-	-	-	-	-	-	-	-	-	-	-	-	-	-	-	-	-	-	-	-	-	-	-	-	-	-	-	-	-	-	-	-	-	-	-	-
AX-176819115	Aradu.A02	2495363	Sten1	-	-	-	-	-	-	-	-	-	-	-	-	-	-	-	-	-	-	-	-	-	-	-	-	-	-	-	-	-	-	-	-	-	-	-	-	-	-	-	-	-	-	-	-	-	-
AX-147240131	Aradu.A02	2497226	Sten2	-	-	-	-	-	-	-	-	-	-	-	-	-	-	-	-	-	-	-	-	-	-	-	-	-	-	-	-	-	-	-	-	-	-	-	-	-	-	-	-	-	-	-	-	-	-
AX-176823935	Aradu.A02	2530491	Sten2	-	-	-	-	-	-	-	-	-	-	-	-	-	-	-	-	-	-	-	-	-	-	-	-	-	-	-	-	-	-	-	-	-	-	-	-	-	-	-	-	-	-	-	-	-	-
AX-147212659	Aradu.A02	2557316	Sten1	-	-	-	-	-	-	-	-	-	-	-	-	-	-	-	-	-	-	-	-	-	-	-	-	-	-	-	-	-	-	-	-	-	-	-	-	-	-	-	-	-	-	-	-	-	-
AX-147212669	Aradu.A02	2594478	Sten2	-	-	-	-	-	-	-	-	-	-	-	-	-	-	-	-	-	-	-	-	-	-	-	-	-	-	-	-	-	-	-	-	-	-	-	-	-	-	-	-	-	-	-	-	-	-
AX-147212672	Aradu.A02	2595255	Sten2	-	-	-	-	-	-	-	-	-	-	-	-	-	-	-	-	-	-	-	-	-	-	-	-	-	-	-	-	-	-	-	-	-	-	-	-	-	-	-	-	-	-	-	-	-	-
AX-176821041	Aradu.A02	2599915	Sten2	-	-	-	-	-	-	-	-	-	-	-	-	-	-	-	-	-	-	-	-	-	-	-	-	-	-	-	-	-	-	-	-	-	-	-	-	-	-	-	-	-	-	-	-	-	-
AX-147212687	Aradu.A02	2640814	Sten2	-	-	-	-	-	-	-	-	-	-	-	-	-	-	-	-	-	-	-	-	-	-	-	-	-	-	-	-	-	-	-	-	-	-	-	-	-	-	-	-	-	-	-	-	-	-
AX-176819218	Aradu.A02	2782248	Sten1	-	-	-	-	-	-	-	-	-	-	-	-	-	-	-	-	-	-	-	-	-	-	-	-	-	-	-	-	-	-	-	-	-	-	-	-	-	-	-	-	-	-	-	-	-	-
AX-176821862	Aradu.A02	2827935	Sten1	-	-	-	-	-	-	-	-	-	-	-	-	-	-	-	-	-	-	-	-	-	-	-	-	-	-	-	-	-	-	-	-	-	-	-	-	-	-	-	-	-	-	-	-	-	-
AX-147212764	Aradu.A02	2931093	Sten1	-	-	-	-	-	-	-	-	-	-	-	-	-	-	-	-	-	-	-	-	-	-	-	-	-	-	-	-	-	-	-	-	-	-	-	-	-	-	-	-	-	-	-	-	-	-
AX-147240252	Aradu.A02	2931111	Sten1	-	-	-	-	-	-	-	-	-	-	-	-	-	-	-	-	-	-	-	-	-	-	-	-	-	-	-	-	-	-	-	-	-	-	-	-	-	-	-	-	-	-	-	-	-	-
AX-147212765	Aradu.A02	2932724	Sten2	-	-	-	-	-	-	-	-	-	-	-	-	-	-	-	-	-	-	-	-	-	-	-	-	-	-	-	-	-	-	-	-	-	-	-	-	-	-	-	-	-	-	-	-	-	-
AX-176821123	Aradu.A02	3001008	-	-	-	-	-	-	-	-	-	-	-	-	-	-	-	-	-	-	-	-	-	-	-	-	-	-	-	-	-	-	-	-	-	-	-	-	-	-	-	-	-	-	-	-	-	-	-
AX-176822843	Aradu.A02	3036319	Sten1	-	-	-	-	-	-	-	-	-	-	-	-	-	-	-	-	-	-	-	-	-	-	-	-	-	-	-	-	-	-	-	-	-	-	-	-	-	-	-	-	-	-	-	-	-	-
AX-176823331	Aradu.A02	3040802	Sten1	-	-	-	-	-	-	-	-	-	-	-	-	-	-	-	-	-	-	-	-	-	-	-	-	-	-	-	-	-	-	-	-	-	-	-	-	-	-	-	-	-	-	-	-	-	-
AX-176820632	Aradu.A02	3049512	Sten2	-	-	-	-	-	-	-	-	-	-	-	-	-	-	-	-	-	-	-	-	-	-	-	-	-	-	-	-	-	-	-	-	-	-	-	-	-	-	-	-	-	-	-	-	-	-
AX-147212820	Aradu.A02	3375612	Sten2	-	-	-	-	-	-	-	-	-	-	-	-	-	-	-	-	-	-	-	-	-	-	-	-	-	-	-	-	-	-	-	-	-	-	-	-	-	-	-	-	-	-	-	-	-	-
AX-147240352	Aradu.A02	3377119	Sten2	-	-	-	-	-	-	-	-	-	-	-	-	-	-	-	-	-	-	-	-	-	-	-	-	-	-	-	-	-	-	-	-	-	-	-	-	-	-	-	-	-	-	-	-	-	-
AX-176820410	Aradu.A02	3377383	Sten2	-	-	-	-	-	-	-	-	-	-	-	-	-	-	-	-	-	-	-	-	-	-	-	-	-	-	-	-	-	-	-	-	-	-	-	-	-	-	-	-	-	-	-	-	-	-
AX-176820559	Aradu.A02	3486571	Sten2	-	-	-	-	-	-	-	-	-	-	-	-	-	-	-	-	-	-	-	-	-	-	-	-	-	-	-	-	-	-	-	-	-	-	-	-	-	-	-	-	-	-	-	-	-	-
AX-176823912	Aradu.A02	3490189	Sten2	-	-	-	-	-	-	-	-	-	-	-	-	-	-	-	-	-	-	-	-	-	-	-	-	-	-	-	-	-	-	-	-	-	-	-	-	-	-	-	-	-	-	-	-	-	-
AX-177639986	Aradu.A02	3666632	Sten2	-	-	-	Sten2	-	-	-	-	Sten1	-	-	Sten1	-	Sten2	-	-	-	-	-	-	-	-	-	-	-	-	-	-	Sten1	-	-	-	-	-	Sten1	-	-	Sten1	-	Sten2	-	Sten1	-	-	-	Sten1
AX-177638814	Aradu.A02	3667446	Sten2	-	-	-	-	-	-	-	-	-	-	-	-	-	Sten2	-	Sten1	-	-	-	-	-	-	-	-	-	-	-	-	-	-	-	-	-	-	-	-	-	-	-	Sten2	-	Sten1	-	-	-	Sten1
AX-147212858	Aradu.A02	3769110	Sten2	-	-	-	-	-	-	-	Sten1	-	Sten1	-	Sten1	-	Sten2	-	-	-	-	-	-	-	-	-	-	-	-	-	-	-	-	-	-	-	-	-	-	-	-	-	-	-	Sten2	-	-	-	-
AX-147240478	Aradu.A02	3939035	Sten2	-	-	-	-	-	-	-	Sten1	-	Sten1	-	Sten1	-	Sten2	-	-	-	-	-	-	-	-	-	-	-	-	-	-	-	-	-	-	-	-	-	-	-	-	-	-	-	Sten2	-	-	-	-
AX-147240497	Aradu.A02	4085059	-	-	-	-	-	-	-	-	-	-	-	-	-	-	Sten1	-	-	-	-	-	-	-	-	-	-	-	-	-	-	-	-	-	-	-	-	-	-	-	-	-	-	-	Sten1	-	-	-	-
AX-176819448	Aradu.A02	4403696	Sten1	-	-	-	-	-	-	-	Sten1	-	Sten1	-	Sten1	-	Sten1	-	-	-	-	-	-	-	-	-	-	-	-	-	-	-	-	-	-	-	-	-	-	-	-	-	-	-	Sten1	-	-	-	-
AX-176794388	Aradu.A02	4576169	-	-	-	-	-	-	-	-	-	-	-	-	-	-	-	-	-	-	-	-	-	-	-	-	-	-	-	-	-	-	-	-	-	-	-	-	-	-	-	-	-	-	-	-	-	-	-
AX-147240530	Aradu.A02	4723506	Sten2	-	-	-	-	-	-	-	Sten1	-	Sten1	-	Sten1	-	Sten2	-	-	-	-	-	-	-	-	-	-	-	-	-	-	-	-	-	-	-	-	-	-	-	-	-	-	-	Sten2	-	-	-	-
AX-147240532	Aradu.A02	4724850	Sten2	-	-	-	-	-	-	-	Sten1	-	Sten1	-	Sten1	-	Sten2	-	-	-	-	-	-	-	-	-	-	-	-	-	-	-	-	-	-	-	-	-	-	-	-	-	-	-	Sten2	-	-	-	-
AX-147212940	Aradu.A02	4851345	Sten2	-	-	-	-	-	-	-	Sten1	-	Sten1	-	Sten1	-	Sten2	-	-	-	-	-	-	-	-	-	-	-	-	-	-	-	-	-	-	-	-	-	-	-	-	-	-	-	Sten2	-	-	-	-
AX-147212952	Aradu.A02	4883639	Sten2	-	-	-	-	-	-	-	Sten1	-	Sten1	-	Sten1	-	Sten2	-	-	-	-	-	-	-	-	-	-	-	-	-	-	-	-	-	-	-	-	-	-	-	-	-	-	-	Sten2	-	-	-	-
AX-147240559	Aradu.A02	4888203	-	-	-	-	-	-	-	-	Sten1	-	Sten1	-	Sten1	-	Sten2	-	-	-	-	-	-	-	-	-	-	-	-	-	-	-	-	-	-	-	-	-	-	-	-	-	-	-	Sten2	-	-	-	-
AX-176792125	Aradu.A02	4899160	Sten1	-	-	-	-	-	-	-	Sten1	-	Sten1	-	Sten1	-	Sten2	-	-	-	-	-	-	-	-	-	-	-	-	-	-	-	-	-	-	-	-	-	-	-	-	-	-	-	Sten2	-	-	-	-
AX-147212981	Aradu.A02	5238703	Sten2	-	-	-	-	-	-	-	Sten1	-	Sten1	-	Sten1	-	Sten2	-	-	-	-	-	-	-	-	-	-	-	-	-	-	-	-	-	-	-	-	-	-	-	-	-	-	-	Sten2	-	-	-	-
AX-147212990	Aradu.A02	5270226	Sten2	-	-	-	-	-	-	-	Sten1	-	Sten1	-	Sten1	-	Sten2	-	-	-	-	-	-	-	-	-	-	-	-	-	-	-	-	-	-	-	-	-	-	-	-	-	-	-	Sten2	-	-	-	-
AX-147213014	Aradu.A02	5535443	Sten2	-	-	-	-	-	-	-	Sten1	-	Sten1	-	Sten1	-	Sten2	-	-	-	-	-	-	-	-	-	-	-	-	-	-	-	-	-	-	-	-	-	-	-	-	-	-	-	Sten2	-	-	-	-
AX-147213017	Aradu.A02	5537506	Sten2	-	-	-	-	-	-	-	-	-	Sten1	-	Sten2	-	Sten2	-	-	-	-	-	-	-	-	-	-	-	-	-	-	-	-	-	-	-	-	-	Sten1	-	-	-	-	-	Sten2	-	-	-	-
AX-147213029	Aradu.A02	5597149	Sten2	-	-	-	-	-	-	-	Sten1	-	Sten1	-	Sten1	-	Sten2	-	-	-	-	-	-	-	-	-	-	-	-	-	-	-	-	-	-	-	-	-	-	-	-	-	-	-	-	-	-	-	-
AX-177643693	Aradu.A02	5796224	Sten2	-	-	-	-	-	-	-	Sten1	-	Sten1	-	Sten1	-	Sten2	-	-	-	-	-	-	-	-	-	-	-	-	-	-	-	-	-	-	-	-	-	-	-	-	-	-	-	Sten2	-	-	-	-
AX-177643707	Aradu.A02	5816135	Sten2	-	-	-	-	-	-	-	Sten1	-	Sten1	-	Sten1	-	Sten2	-	-	-	-	-	-	-	-	-	-	-	-	-	-	-	-	-	-	-	-	-	-	-	-	-	-	-	Sten2	-	-	-	-
AX-147213119	Aradu.A02	6341150	-	-	-	-	-	-	-	-	Sten1	-	Sten1	-	Sten1	-	Sten2	-	-	-	-	-	-	-	-	-	-	-	-	-	-	-	-	-	-	-	-	-	-	-	-	-	-	-	Sten2	-	-	-	-
AX-147213146	Aradu.A02	6593512	Sten2	-	-	-	-	-	-	-	Sten1	-	Sten1	-	Sten1	-	Sten2	-	-	-	-	-	-	-	-	-	-	-	-	-	-	-	-	-	-	-	-	-	-	-	-	-	-	-	Sten2	-	-	-	-
AX-147213155	Aradu.A02	6827826	Sten2	-	-	-	-	-	-	-	Sten1	-	-	-	Sten1	-	Sten2	-	-	-	-	-	-	-	-	-	-	-	-	-	-	-	-	-	-	-	-	-	-	-	-	-	-	-	Sten2	-	-	-	-
AX-147213230	Aradu.A02	8195496	Sten2	-	-	-	-	-	-	-	Sten1	-	Sten1	-	Sten1	-	Sten2	-	-	-	-	-	-	-	-	-	-	-	-	-	-	-	-	-	-	-	-	-	-	-	-	-	-	-	Sten2	-	-	-	-
AX-147213245	Aradu.A02	8377985	Sten2	-	-	-	-	-	-	-	Sten1	-	Sten1	-	Sten1	-	Sten1	-	-	-	-	-	-	-	-	-	-	-	-	-	-	-	-	-	-	-	-	-	-	-	-	-	-	-	Sten2	-	-	-	-
AX-147213292	Aradu.A02	8798082	Sten2	-	-	-	-	-	-	-	Sten1	-	Sten1	-	Sten1	-	Sten2	-	-	-	-	-	-	-	-	-	-	-	-	-	-	-	-	-	-	-	-	-	-	-	-	-	-	-	Sten2	-	-	-	-
AX-147213317	Aradu.A02	9782639	Sten2	-	-	-	-	-	-	-	Sten1	-	Sten1	-	Sten1	-	Sten2	-	-	-	-	-	-	-	-	-	-	-	-	-	-	-	-	-	-	-	-	-	-	-	-	-	-	-	Sten2	-	-	-	-
AX-147213328	Aradu.A02	10054069	Sten1	-	-	-	-	-	-	-	Sten1	-	Sten1	-	Sten1	-	Sten1	-	-	-	-	-	-	-	-	-	-	-	-	-	-	-	-	-	-	-	-	-	-	-	-	-	-	-	Sten1	-	-	-	-
AX-176823661	Aradu.A02	14728483	Sten1	-	-	-	-	-	-	-	-	-	-	-	-	-	Sten1	-	-	-	-	-	-	-	-	-	-	-	-	-	-	-	-	-	-	-	-	-	-	-	-	-	-	-	-	-	-	-	-
AX-147213472	Aradu.A02	14937685	Sten2	-	-	-	-	-	-	-	Sten1	-	Sten1	-	Sten1	-	Sten2	-	-	-	-	-	-	-	-	-	-	-	-	-	-	-	-	-	-	-	-	-	-	-	-	-	-	-	Sten2	-	-	-	-
AX-147213476	Aradu.A02	14943833	Sten2	-	-	-	-	-	-	-	Sten1	-	Sten1	-	Sten1	-	Sten2	-	-	-	-	-	-	-	-	-	-	-	-	-	-	-	-	-	-	-	-	-	-	-	-	-	-	-	Sten2	-	-	-	-
AX-147213604	Aradu.A02	25951674	Sten2	-	-	-	-	-	-	-	Sten1	-	Sten1	-	Sten1	-	Sten2	-	-	-	-	-	-	-	-	-	-	-	-	-	-	-	-	-	-	-	-	-	-	-	-	-	-	-	Sten2	-	-	-	-
AX-147213615	Aradu.A02	28157230	Sten2	-	-	-	-	-	-	-	Sten1	-	Sten1	-	Sten1	-	Sten2	-	-	-	-	-	-	-	-	-	-	-	-	-	-	-	-	-	-	-	-	-	-	-	-	-	-	-	Sten2	-	-	-	-
AX-147213631	Aradu.A02	28574740	Sten2	-	-	-	-	-	-	-	Sten1	-	Sten1	-	Sten1	-	Sten2	-	-	-	-	-	-	-	-	-	-	-	-	-	-	-	-	-	-	-	-	-	-	-	-	-	-	-	Sten2	-	-	-	-
AX-176799890	Aradu.A02	30279507	Sten1	-	-	-	-	-	-	-	Sten1	-	Sten1	-	Sten1	-	Sten1	-	-	-	-	-	-	-	-	-	-	-	-	-	-	-	-	-	-	-	-	-	-	-	-	-	-	-	Sten1	-	-	-	-
AX-176807891	Aradu.A02	32202107	-	-	-	-	-	-	-	-	Sten1	-	Sten1	-	Sten1	-	Sten1	-	-	-	-	-	-	-	-	-	-	-	-	-	-	-	-	-	-	-	-	-	-	-	-	-	-	-	Sten1	-	-	-	-
AX-176806576	Aradu.A02	33864947	Sten1	-	-	-	-	-	-	-	Sten1	-	-	-	Sten1	-	Sten1	-	-	-	-	-	-	-	-	-	-	-	-	-	-	-	-	-	-	-	-	-	-	-	-	-	-	-	Sten1	-	-	-	-
AX-147213672	Aradu.A02	36455473	Sten2	-	-	-	-	-	-	-	Sten1	-	Sten1	-	Sten1	-	Sten2	-	-	-	-	-	-	-	-	-	-	-	-	-	-	-	-	-	-	-	-	-	-	-	-	-	-	-	Sten2	-	-	-	-
AX-147213689	Aradu.A02	39267704	Sten2	-	-	-	-	-	-	-	Sten1	-	Sten1	-	Sten1	-	Sten2	-	-	-	-	-	-	-	-	-	-	-	-	-	-	-	-	-	-	-	-	-	-	-	-	-	-	-	Sten2	-	-	-	-
AX-147213719	Aradu.A02	42029329	Sten2	-	-	-	-	-	-	-	Sten1	-	Sten1	-	Sten1	-	Sten2	-	-	-	-	-	-	-	-	-	-	-	-	-	-	-	-	-	-	-	-	-	-	-	-	-	-	-	Sten2	-	-	-	-
AX-147213736	Aradu.A02	43374948	Sten2	-	-	-	-	-	-	-	Sten1	-	Sten1	-	Sten1	-	Sten2	-	-	-	-	-	-	-	-	-	-	-	-	-	-	-	-	-	-	-	-	-	-	-	-	-	-	-	Sten2	-	-	-	-
AX-147213756	Aradu.A02	47309222	Sten2	-	-	-	-	-	-	-	Sten1	-	Sten1	-	Sten1	-	Sten2	-	-	-	-	-	-	-	-	-	-	-	-	-	-	-	-	-	-	-	-	-	-	-	-	-	-	-	Sten2	-	-	-	-
AX-176810943	Aradu.A02	50000826	Sten2	-	-	-	-	-	-	-	Sten1	-	Sten1	-	Sten1	-	Sten2	-	-	-	-	-	-	-	-	-	-	-	-	-	-	-	-	-	-	-	-	-	-	-	-	-	-	-	Sten2	-	-	-	-
AX-147213789	Aradu.A02	52237448	Sten2	-	-	-	-	-	-	-	Sten1	-	Sten1	-	Sten1	-	Sten2	-	-	-	-	-	-	-	-	-	-	-	-	-	-	-	-	-	-	-	-	-	-	-	-	-	-	-	Sten2	-	-	-	-
AX-176808317	Aradu.A02	61811601	-	-	-	-	-	-	-	-	-	-	-	-	-	-	-	-	-	-	-	-	-	-	-	-	-	-	-	-	-	-	-	-	-	-	-	-	-	-	-	-	-	-	-	-	-	-	-
AX-176823269	Aradu.A02	62077250	Sten1	-	-	-	-	-	-	-	-	-	-	-	-	-	-	-	-	-	-	-	-	-	-	-	-	-	-	-	-	-	-	-	-	-	-	-	-	-	-	-	-	-	-	-	-	-	-
AX-176814119	Aradu.A02	62739123	Sten1	-	-	-	-	-	-	-	-	-	-	-	-	-	-	-	-	-	-	-	-	-	-	-	-	-	-	-	-	-	-	-	-	-	-	-	-	-	-	-	-	-	-	-	-	-	-
AX-147213949	Aradu.A02	64315367	Sten1	-	-	-	-	-	-	-	-	-	-	-	Sten1	-	Sten1	-	-	-	-	-	-	-	-	-	-	-	-	-	-	-	-	-	-	-	-	-	-	-	-	-	-	-	Sten1	-	-	-	-
AX-177644064	Aradu.A02	65804378	-	-	-	-	-	-	-	-	-	-	-	-	-	-	-	-	-	-	-	-	-	-	-	-	-	-	-	-	-	-	-	-	-	-	-	-	-	-	-	-	-	-	-	-	-	-	-
AX-147213981	Aradu.A02	66368426	Sten2	-	-	-	-	-	-	-	Sten1	-	Sten1	-	Sten1	-	Sten2	-	-	-	-	-	-	-	-	-	-	-	-	-	-	-	-	-	-	-	-	-	-	-	Sten1	-	-	-	Sten2	-	-	-	-
AX-147213986	Aradu.A02	67017415	Sten2	-	-	-	-	-	-	-	-	-	Sten1	-	-	-	Sten2	-	-	-	-	-	-	-	-	-	-	-	-	-	-	-	-	-	-	-	-	-	-	-	-	-	-	-	Sten2	-	-	-	-
AX-176814130	Aradu.A02	67418284	-	-	-	-	-	-	-	-	-	-	-	-	-	-	-	-	-	-	-	-	-	-	-	-	-	-	-	-	-	-	-	-	-	-	-	-	-	-	-	-	-	-	-	-	-	-	-
AX-176799928	Aradu.A02	67418357	Sten1	-	-	-	-	-	-	-	Sten1	-	Sten1	-	Sten1	-	Sten1	-	-	-	-	-	-	-	Sten1	-	-	-	-	-	-	-	-	-	-	-	-	-	-	-	Sten1	-	-	-	Sten1	-	-	-	-
AX-147214000	Aradu.A02	67418862	Sten1	-	-	-	-	-	-	-	-	-	-	-	-	-	Sten1	-	-	-	-	-	-	-	-	-	-	-	-	-	-	-	-	-	-	-	-	-	-	-	Sten1	-	-	-	Sten1	-	-	-	-
AX-147214001	Aradu.A02	67418874	Sten1	-	-	-	-	-	-	-	Sten1	-	Sten1	-	Sten1	-	Sten1	-	-	-	-	-	-	-	-	-	-	-	-	-	-	-	-	-	-	-	-	-	-	-	Sten1	-	-	-	Sten1	-	-	-	-
AX-176793869	Aradu.A02	67419937	-	-	-	-	-	-	-	-	-	-	-	-	-	-	-	-	-	-	-	-	-	-	-	-	-	-	-	-	-	-	-	-	-	-	-	-	-	-	-	-	-	-	-	-	-	-	-
AX-147214003	Aradu.A02	67420486	Sten1	-	-	-	-	-	-	-	Sten1	-	-	-	Sten1	-	Sten1	-	-	-	-	-	-	-	-	-	-	-	-	-	-	-	-	-	-	-	-	-	-	-	Sten1	-	-	-	Sten1	-	-	-	-
AX-147214004	Aradu.A02	67420580	Sten1	-	-	-	-	-	-	-	Sten1	-	-	-	Sten1	-	Sten1	-	-	-	-	-	-	-	-	-	-	-	-	-	-	-	-	-	-	-	-	-	-	-	Sten1	-	-	-	Sten1	-	-	-	-
AX-176822439	Aradu.A02	69099226	-	-	-	-	-	-	-	-	-	-	-	-	-	-	-	-	-	-	-	-	-	-	-	-	-	-	-	-	-	-	-	-	-	-	-	-	-	-	-	-	-	-	-	-	-	-	-
AX-176806977	Aradu.A02	73927285	Sten1	-	-	-	-	-	-	-	Sten1	-	Sten1	-	Sten1	-	Sten1	-	-	-	-	-	-	-	-	-	-	-	-	-	-	-	-	-	-	-	-	-	-	-	Sten1	-	-	-	Sten1	-	-	-	-
AX-176814164	Aradu.A02	74475889	-	-	-	-	-	-	-	-	-	-	-	-	-	-	-	-	-	-	-	-	-	-	-	-	-	-	-	-	-	-	-	-	-	-	-	-	-	-	-	-	-	-	-	-	-	-	-
AX-147214185	Aradu.A02	75731986	Sten2	-	-	-	-	-	-	-	Sten1	-	Sten1	-	Sten1	-	Sten2	-	-	-	-	-	-	-	-	-	-	-	-	-	-	-	-	-	-	-	-	-	-	-	Sten1	-	-	-	Sten2	-	-	-	-
AX-147214234	Aradu.A02	78187923	Sten2	-	-	-	-	-	-	-	Sten1	-	Sten1	-	Sten1	-	Sten2	-	-	-	-	-	-	-	-	-	-	-	-	-	-	-	-	-	-	-	-	-	-	-	Sten1	-	-	-	Sten2	-	-	-	-
AX-176817694	Aradu.A02	79027979	-	-	-	-	-	-	-	-	-	-	-	-	-	-	-	-	-	-	-	-	-	-	-	-	-	-	-	-	-	-	-	-	-	-	-	-	-	-	-	-	-	-	-	-	-	-	-
AX-147241878	Aradu.A02	79414030	Sten2	-	-	-	-	-	-	-	Sten1	-	Sten1	-	Sten1	-	Sten2	-	-	-	-	-	-	-	-	-	-	-	-	-	-	-	-	-	-	-	-	-	-	-	Sten1	-	-	-	Sten2	-	-	-	-
AX-147241920	Aradu.A02	80297365	Sten1	-	-	-	-	-	-	-	-	-	Sten1	-	Sten1	-	Sten1	-	-	-	-	-	-	-	-	-	-	-	-	-	-	-	-	-	-	-	-	-	-	-	-	-	-	-	Sten1	-	-	-	-
AX-176810329	Aradu.A02	80730421	Sten2	-	-	-	-	-	-	-	Sten1	-	Sten1	-	Sten1	-	Sten2	-	-	-	-	-	-	-	-	-	-	-	-	-	-	-	-	-	-	-	-	-	-	-	-	-	-	-	Sten2	-	-	-	-
AX-147214462	Aradu.A02	81019015	Sten1	-	-	-	-	-	-	-	Sten1	-	Sten1	-	Sten1	-	Sten1	-	-	-	-	-	-	-	-	-	-	-	-	-	-	-	-	-	-	-	-	-	-	-	Sten1	-	-	-	Sten1	-	-	-	-
AX-147214521	Aradu.A02	81609784	Sten2	-	-	-	-	-	-	-	Sten1	-	Sten1	-	Sten1	-	Sten2	-	-	-	-	-	-	-	-	-	-	-	-	-	-	-	-	-	-	-	-	-	-	-	Sten1	-	-	-	Sten2	-	-	-	-
AX-176803866	Aradu.A02	82726495	Sten2	-	-	-	-	-	-	-	Sten1	-	Sten1	-	-	-	Sten2	-	-	-	-	-	-	-	-	-	-	-	-	-	-	-	-	-	-	-	-	-	-	-	Sten1	-	-	-	Sten2	-	-	-	-
AX-147242084	Aradu.A02	82726525	Sten2	-	-	-	-	-	-	-	Sten1	-	Sten1	-	Sten1	-	Sten2	-	-	-	-	-	-	-	-	-	-	-	-	-	-	-	-	-	-	-	-	-	-	-	Sten1	-	-	-	Sten2	-	-	-	-
AX-147214609	Aradu.A02	82990736	Sten2	-	-	-	-	-	-	-	Sten1	-	Sten1	-	Sten1	-	Sten2	-	-	-	-	-	-	-	-	-	-	-	-	-	-	-	-	-	-	-	-	-	-	-	Sten1	-	-	-	Sten2	-	-	-	-
AX-147214665	Aradu.A02	83464195	Sten2	-	-	-	-	-	-	-	Sten1	-	Sten1	-	Sten1	-	Sten2	-	-	-	-	-	-	-	-	-	-	-	-	-	-	-	-	-	-	-	-	-	-	-	Sten1	-	-	-	Sten2	-	-	-	-
AX-147242202	Aradu.A02	84827010	Sten2	-	-	-	-	-	-	-	Sten1	-	Sten1	-	Sten1	-	Sten2	-	-	-	-	-	-	-	-	-	-	-	-	-	-	-	-	-	-	-	-	-	-	-	Sten1	-	-	-	Sten2	-	-	-	-
AX-147242208	Aradu.A02	84880919	Sten2	-	-	-	-	-	-	-	Sten1	-	Sten1	-	Sten1	-	Sten2	-	-	-	-	-	-	-	-	-	-	-	-	-	-	-	-	-	-	-	-	-	-	-	Sten1	-	-	-	Sten2	-	-	-	-
AX-177641619	Aradu.A02	85209133	Sten2	-	-	-	-	-	-	-	Sten1	-	Sten1	-	Sten1	-	Sten1	-	-	-	-	-	-	-	-	-	-	-	-	-	-	-	-	-	-	-	-	-	-	-	Sten1	-	-	-	-	-	-	-	-
AX-147214809	Aradu.A02	85315365	Sten2	-	-	-	-	-	-	-	Sten1	-	Sten1	-	Sten1	-	Sten2	-	-	-	-	-	-	-	-	-	-	-	-	-	-	-	-	-	-	-	-	-	-	-	Sten1	-	-	-	Sten2	-	-	-	-
AX-147214811	Aradu.A02	85316535	Sten2	-	-	-	-	-	-	-	Sten1	-	Sten1	-	Sten1	-	Sten2	-	-	-	-	-	-	-	-	-	-	-	-	-	-	-	-	-	-	-	-	-	-	-	Sten1	-	-	-	Sten2	-	-	-	-
AX-176815768	Aradu.A02	86069667	Sten2	-	-	-	-	-	-	-	Sten1	-	Sten1	-	Sten1	-	Sten2	-	-	-	-	-	-	-	-	-	-	-	-	-	-	-	-	-	-	-	-	-	Sten1	-	Sten1	-	-	-	Sten2	-	-	-	-
AX-176797275	Aradu.A02	86659682	-	-	-	-	-	-	-	-	-	-	-	-	-	-	Sten1	-	-	-	-	-	-	-	Sten1	-	-	-	-	-	-	-	-	-	-	-	-	-	-	-	-	-	-	-	Sten1	-	-	-	-
AX-147214925	Aradu.A02	87417752	Sten2	-	-	-	-	-	-	-	Sten1	-	Sten1	-	Sten1	-	Sten2	-	-	-	-	-	-	-	-	-	-	-	-	-	-	-	-	-	-	-	-	-	-	-	Sten1	-	-	-	Sten2	-	-	-	-
AX-176808199	Aradu.A02	89078850	Sten2	-	-	-	-	-	-	-	Sten1	-	Sten1	-	Sten1	-	Sten2	-	-	-	-	-	-	-	-	-	-	-	-	-	-	-	-	-	-	-	-	-	-	-	Sten1	-	Sten2	-	-	-	-	-	Sten1
AX-147215014	Aradu.A02	89159922	Sten2	-	-	-	-	-	-	-	Sten1	-	Sten1	-	Sten1	-	Sten2	-	-	-	-	-	-	-	-	-	-	-	-	-	-	-	-	-	-	-	-	-	-	-	Sten1	-	Sten2	-	Sten1	-	-	-	Sten1
AX-176791419	Aradu.A02	90812650	Sten1	-	-	-	-	-	-	-	-	-	-	-	Sten1	-	Sten2	-	Sten1	-	-	-	-	-	-	-	-	-	-	-	-	-	-	-	-	-	-	-	-	-	Sten1	-	Sten2	-	Sten1	-	-	-	Sten1
AX-147215181	Aradu.A02	91638679	Sten2	-	-	-	Sten1	-	-	-	-	-	-	-	Sten1	-	Sten2	-	Sten1	-	-	-	-	-	-	-	-	-	-	-	-	-	-	-	-	-	Sten1	-	-	-	Sten1	-	Sten2	-	Sten1	-	-	-	Sten1
AX-147215183	Aradu.A02	91655615	-	-	-	-	-	-	-	-	-	-	-	-	-	-	-	-	-	-	-	-	-	-	-	-	-	-	-	-	-	-	-	-	-	-	-	-	-	-	-	-	-	-	-	-	-	-	-
AX-147215210	Aradu.A02	92077207	-	-	Sten1	-	Sten1	-	-	-	-	-	-	-	Sten1	-	Sten1	-	Sten1	-	-	-	-	-	-	-	-	-	-	-	-	-	-	-	-	-	-	-	-	-	Sten1	-	Sten1	-	Sten1	-	-	-	Sten1
AX-147242811	Aradu.A02	92317831	Sten1	-	-	-	-	-	-	-	-	-	-	-	-	-	Sten1	-	-	-	-	-	-	-	-	-	-	-	-	-	-	-	-	-	-	-	-	-	-	-	-	-	-	-	-	-	-	-	-
AX-147242820	Aradu.A02	92612264	Sten2	-	Sten1	-	Sten1	-	-	-	-	-	-	-	Sten1	-	Sten2	-	Sten1	-	-	-	-	-	-	-	-	-	-	-	-	-	-	-	-	-	-	-	-	-	Sten1	-	Sten2	-	Sten1	-	-	-	Sten1
AX-147215231	Aradu.A02	92958971	-	-	Sten1	-	Sten1	-	-	-	-	-	-	-	Sten1	-	Sten2	-	Sten1	-	-	-	-	-	-	-	-	-	-	-	-	-	-	-	-	-	-	-	-	-	Sten1	-	Sten2	-	Sten1	-	-	-	Sten1
AX-147215261	Aradu.A02	93790795	Sten2	-	Sten1	-	Sten1	-	-	-	-	-	-	-	Sten1	-	Sten2	-	Sten2	-	-	Sten1	-	Sten1	-	Sten2	-	Sten2	-	-	-	-	-	-	-	Sten1	-	Sten1	-	Sten1	Sten2	-	Sten2	-	Sten1	-	Sten1	-	Sten1
AX-147215287	Aradu.A03	263799	Sten2	-	-	-	-	-	-	-	-	-	-	-	-	-	-	-	-	-	-	-	-	-	-	-	-	-	-	-	-	-	-	-	-	-	-	-	-	-	-	-	-	-	-	-	-	-	-
AX-147215321	Aradu.A03	679404	Sten2	-	-	-	-	-	-	-	-	-	-	-	-	-	-	-	-	-	-	-	-	-	-	-	-	-	-	-	-	-	-	-	-	-	-	-	-	-	-	-	-	-	-	-	-	-	-
AX-176808280	Aradu.A03	1215455	Sten2	-	-	-	-	-	-	-	-	-	-	-	-	-	-	-	-	-	-	-	-	-	-	-	-	-	-	-	-	-	-	-	-	-	-	-	-	-	-	-	-	-	-	-	-	-	-
AX-147215412	Aradu.A03	1816539	Sten2	-	-	-	-	-	-	-	-	-	-	-	-	-	-	-	-	-	-	-	-	-	-	-	-	-	-	-	-	-	-	-	-	-	-	-	-	-	-	-	-	-	-	-	-	-	-
AX-147215423	Aradu.A03	1954749	Sten2	-	-	-	-	-	-	-	-	-	-	-	-	-	-	-	-	-	-	-	-	-	-	-	-	-	-	-	-	-	-	-	-	-	-	-	-	-	-	-	-	-	-	-	-	-	-
AX-147215426	Aradu.A03	1989523	Sten2	-	-	-	-	-	-	-	-	-	-	-	-	-	-	-	-	-	-	-	-	-	-	-	-	-	-	-	-	-	-	-	-	-	-	-	-	-	-	-	-	-	-	-	-	-	-
AX-147215435	Aradu.A03	2018420	Sten2	-	-	-	-	-	-	-	-	-	-	-	-	-	-	-	-	-	-	-	-	-	-	-	-	-	-	-	-	-	-	-	-	-	-	-	-	-	-	-	-	-	-	-	-	-	-
AX-147215548	Aradu.A03	3445290	Sten1	-	-	-	-	-	-	-	-	-	-	-	-	-	-	-	-	-	-	-	-	-	-	-	-	-	-	-	-	-	-	-	-	-	-	-	-	-	-	-	-	-	-	-	-	-	-
AX-147215573	Aradu.A03	3808006	Sten2	-	-	-	-	-	-	-	-	-	-	-	-	-	-	-	-	-	-	-	-	-	-	-	-	-	-	-	-	-	-	-	-	-	-	-	-	-	-	-	-	-	-	-	-	-	-
AX-147215631	Aradu.A03	4763112	Sten2	-	-	-	-	-	-	-	-	-	-	-	-	-	-	-	-	-	-	-	-	-	-	-	-	-	-	-	-	-	-	-	-	-	-	-	-	-	-	-	-	-	-	-	-	-	-
AX-147243456	Aradu.A03	5098297	-	-	-	-	-	-	-	-	-	-	-	-	-	-	-	-	-	-	-	-	-	-	-	-	-	-	-	-	-	-	-	-	-	-	-	-	-	-	-	-	-	-	-	-	-	-	-
AX-147215688	Aradu.A03	6058658	Sten2	-	-	-	-	-	-	-	-	-	-	-	-	-	-	-	-	-	-	-	-	-	-	-	-	-	-	-	-	-	-	-	-	-	-	-	-	-	-	-	-	-	-	-	-	-	-
AX-176795320	Aradu.A03	6247470	Sten1	-	-	-	-	-	-	-	-	-	-	-	-	-	-	-	-	-	-	-	-	-	-	-	-	-	-	-	-	-	-	-	-	-	-	-	-	-	-	-	-	-	-	-	-	-	-
AX-147216005	Aradu.A03	12100920	Sten2	-	-	-	-	-	-	-	-	-	-	-	-	-	-	-	-	-	-	-	-	-	-	-	-	-	-	-	-	-	-	-	-	-	-	-	-	-	-	-	-	-	-	-	-	-	-
AX-147216011	Aradu.A03	12163967	Sten1	-	-	-	-	-	-	-	-	-	-	-	-	-	-	-	-	-	-	-	-	-	-	-	-	-	-	-	-	-	-	-	-	-	-	-	-	-	-	-	-	-	-	-	-	-	-
AX-147216035	Aradu.A03	12860261	Sten2	-	-	-	-	-	-	-	-	-	-	-	-	-	-	-	-	-	-	-	-	-	-	-	-	-	-	-	-	-	-	-	-	-	-	-	-	-	-	-	-	-	-	-	-	-	-
AX-147216048	Aradu.A03	13165005	Sten2	-	-	-	-	-	-	-	-	-	-	-	-	-	-	-	-	-	-	-	-	-	-	-	-	-	-	-	-	-	-	-	-	-	-	-	-	-	-	-	-	-	-	-	-	-	-
AX-176821158	Aradu.A03	19268312	-	-	-	-	-	-	-	-	-	-	-	-	-	-	-	-	-	-	-	-	-	-	-	-	-	-	-	-	-	-	-	-	-	-	-	-	-	-	-	-	-	-	-	-	-	-	-
AX-147244080	Aradu.A03	19856824	Sten2	-	-	-	-	-	-	-	-	-	-	-	-	-	-	-	-	-	-	-	-	-	-	-	-	-	-	-	-	-	-	-	-	-	-	-	-	-	-	-	-	-	-	-	-	-	-
AX-176816839	Aradu.A03	19857137	Sten2	-	-	-	-	-	-	-	-	-	-	-	-	-	-	-	-	-	-	-	-	-	-	-	-	-	-	-	-	-	-	-	-	-	-	-	-	-	-	-	-	-	-	-	-	-	-
AX-147216253	Aradu.A03	20054501	Sten1	-	-	-	-	-	-	-	-	-	-	-	-	-	-	-	-	-	-	-	-	-	-	-	-	-	-	-	-	-	-	-	-	-	-	-	-	-	-	-	-	-	-	-	-	-	-
AX-147216272	Aradu.A03	20811542	Sten1	-	-	-	-	-	-	-	-	-	-	-	-	-	-	-	-	-	-	-	-	-	-	-	-	-	-	-	-	-	-	-	-	-	-	-	-	-	-	-	-	-	-	-	-	-	-
AX-176791993	Aradu.A03	21813574	Sten2	-	-	-	-	-	-	-	-	-	-	-	-	-	-	-	-	-	-	-	-	-	-	-	-	-	-	-	-	-	-	-	-	-	-	-	-	-	-	-	-	-	-	-	-	-	-
AX-147216341	Aradu.A03	22722576	Sten2	-	-	-	-	-	-	-	-	-	-	-	-	-	-	-	-	-	-	-	-	-	-	-	-	-	-	-	-	-	-	-	-	-	-	-	-	-	-	-	-	-	-	-	-	-	-
AX-176805403	Aradu.A03	22782677	Sten2	-	-	-	-	-	-	-	-	-	-	-	-	-	-	-	-	-	-	-	-	-	-	-	-	-	-	-	-	-	-	-	-	-	-	-	-	-	-	-	-	-	-	-	-	-	-
AX-147216380	Aradu.A03	24640457	Sten2	-	-	-	-	-	-	-	-	-	-	-	-	-	-	-	-	-	-	-	-	-	-	-	-	-	-	-	-	-	-	-	-	-	-	-	-	-	-	-	-	-	-	-	-	-	-
AX-147216499	Aradu.A03	27510630	Sten1	-	-	-	-	-	-	-	-	-	-	-	-	-	-	-	-	-	-	-	-	-	-	-	-	-	-	-	-	-	-	-	-	-	-	-	-	-	-	-	-	-	-	-	-	-	-
AX-147216512	Aradu.A03	27813965	Sten2	-	-	-	-	-	-	-	-	-	-	-	-	-	-	-	-	-	-	-	-	-	-	-	-	-	-	-	-	-	-	-	-	-	-	-	-	-	-	-	-	-	-	-	-	-	-
AX-176809707	Aradu.A03	27858345	Sten1	-	-	-	-	-	-	-	-	-	-	-	-	-	-	-	-	-	-	-	-	-	-	-	-	-	-	-	-	-	-	-	-	-	-	-	-	-	-	-	-	-	-	-	-	-	-
AX-147216517	Aradu.A03	28031240	Sten2	-	-	-	-	-	-	-	-	-	-	-	-	-	-	-	-	-	-	-	-	-	-	-	-	-	-	-	-	-	-	-	-	-	-	-	-	-	-	-	-	-	-	-	-	-	-
AX-147216537	Aradu.A03	28985376	Sten2	-	-	-	-	-	-	-	-	-	-	-	-	-	-	-	-	-	-	-	-	-	-	-	-	-	-	-	-	-	-	-	-	-	-	-	-	-	-	-	-	-	-	-	-	-	-
AX-176808649	Aradu.A03	29487939	-	-	-	-	-	-	-	-	-	-	-	-	-	-	-	-	-	-	-	-	-	-	-	-	-	-	-	-	-	-	-	-	-	-	-	-	-	-	-	-	-	-	-	-	-	-	-
AX-176816872	Aradu.A03	29641485	Sten2	-	-	-	-	-	-	-	-	-	-	-	-	-	-	-	-	-	-	-	-	-	-	-	-	-	-	-	-	-	-	-	-	-	-	-	-	-	-	-	-	-	-	-	-	-	-
AX-147216584	Aradu.A03	30066328	-	-	-	-	-	-	-	-	-	-	-	-	-	-	-	-	-	-	-	-	-	-	-	-	-	-	-	-	-	-	-	-	-	-	-	-	-	-	-	-	-	-	-	-	-	-	-
AX-176803667	Aradu.A03	31870379	Sten2	Sten2	Sten2	Sten2	Sten2	-	Sten2	-	Sten2	Sten1	Sten2	Sten2	Sten2	-	Sten2	Sten2	Sten2	Sten1	Sten2	-	Sten2	Sten2	Sten2	-	Sten2	Sten2	Sten2	Sten2	Sten2	Sten1	Sten2	Sten1	Sten2	Sten2	Sten2	Sten1	Sten2	Sten2	Sten2	Sten2	Sten2	Sten2	Sten2	-	Sten2	-	Sten2
AX-147216663	Aradu.A03	33077138	Sten2	-	-	-	-	-	-	-	-	-	-	-	-	-	-	-	-	-	-	-	-	-	-	-	-	-	-	-	-	-	-	-	-	-	-	-	-	-	-	-	-	-	-	-	-	-	-
AX-176821107	Aradu.A03	34011390	Sten1	-	-	-	-	-	-	-	-	-	-	-	-	-	-	-	-	-	-	-	-	-	-	-	-	-	-	Sten1	-	-	-	-	-	Sten1	-	-	-	-	-	-	-	-	-	-	-	-	-
AX-176810405	Aradu.A03	35468284	-	-	-	-	-	-	-	-	-	-	-	-	-	-	-	-	-	-	-	-	-	-	-	-	-	-	-	-	-	-	-	-	-	-	-	-	-	-	-	-	-	-	-	-	-	-	-
AX-176804002	Aradu.A03	38187883	Sten2	-	-	-	-	-	-	-	-	-	-	-	-	-	-	-	-	-	-	-	-	-	-	-	-	-	-	-	-	-	-	-	-	-	-	-	-	-	-	-	-	-	-	-	-	-	-
AX-147216850	Aradu.A03	40250685	Sten1	-	-	-	-	-	-	-	-	-	-	-	-	-	-	-	-	-	-	-	-	-	-	-	-	-	-	-	-	-	-	-	-	-	-	-	-	-	-	-	-	-	-	-	-	-	-
AX-147216857	Aradu.A03	40531384	Sten1	-	-	-	-	-	-	-	-	-	-	-	-	-	-	-	-	-	-	-	-	-	-	-	-	-	-	-	-	-	-	-	-	-	-	-	-	-	-	-	-	-	-	-	-	-	-
AX-176814356	Aradu.A03	42785336	-	-	-	-	-	-	-	-	-	-	-	-	-	-	-	-	-	-	-	-	-	-	Sten1	-	-	-	-	-	-	-	-	-	-	-	-	-	-	-	-	-	-	-	-	-	-	-	-
AX-176792425	Aradu.A03	61827387	Sten2	-	-	-	-	-	-	-	-	-	-	-	-	-	-	-	-	-	-	-	-	-	-	-	-	-	-	-	-	-	-	-	-	-	-	-	-	-	-	-	-	-	-	-	-	-	-
AX-176799401	Aradu.A03	67200396	-	-	-	-	-	-	-	-	-	-	-	-	-	-	-	-	-	-	-	-	-	-	-	-	-	-	-	-	-	-	-	-	-	-	-	-	-	-	-	-	-	-	-	-	-	-	-
AX-147217043	Aradu.A03	71754595	Sten2	-	-	-	-	-	-	-	-	-	-	-	-	-	-	-	-	-	-	-	-	-	-	-	-	-	-	-	-	-	-	-	-	-	-	-	-	-	-	-	-	-	-	-	-	-	-
AX-176808629	Aradu.A03	74451319	-	-	-	-	-	-	-	-	-	-	-	-	-	-	-	-	-	-	-	-	-	-	-	-	-	-	-	-	-	-	-	-	-	-	-	-	-	-	-	-	-	-	-	-	-	-	-
AX-176803560	Aradu.A03	82192471	-	-	-	-	-	-	-	-	-	-	-	-	-	-	-	-	-	-	-	-	-	-	-	-	-	-	-	-	-	-	-	-	-	-	-	-	-	-	-	-	-	-	-	-	-	-	-
AX-147217102	Aradu.A03	85054303	Sten2	-	-	-	-	-	-	-	-	-	-	-	-	-	-	-	-	-	-	-	-	-	-	-	-	-	-	-	-	-	-	-	-	-	-	-	-	-	-	-	-	-	-	-	-	-	-
AX-147217108	Aradu.A03	85255264	Sten1	-	-	-	-	-	-	-	-	-	-	-	-	-	-	-	-	-	-	-	-	-	-	-	-	-	-	-	-	-	-	-	-	-	-	-	-	-	-	-	-	-	-	-	-	-	-
AX-176805622	Aradu.A03	91599139	Sten1	-	-	-	-	Sten1	-	Sten1	-	-	-	Sten1	-	Sten1	-	Sten1	-	-	-	-	-	-	-	-	-	-	-	-	-	-	-	-	-	Sten1	-	-	-	-	-	Sten1	-	Sten1	-	Sten1	-	Sten1	-
AX-147217149	Aradu.A03	94046003	Sten1	-	-	-	-	-	-	-	-	-	-	-	-	-	-	-	-	-	-	-	-	-	-	-	-	-	-	-	-	-	-	-	-	-	-	-	-	-	-	-	-	-	-	-	-	-	-
AX-176819273	Aradu.A03	96285079	Sten2	-	-	-	-	-	-	-	-	-	-	-	-	-	-	-	-	-	-	-	-	-	-	-	-	-	-	-	-	-	-	-	-	-	-	-	-	-	-	-	-	-	-	-	-	-	-
AX-176811743	Aradu.A03	96366712	Sten1	-	-	-	-	Sten1	-	Sten1	-	-	-	-	-	Sten1	-	Sten1	-	Sten1	Sten1	-	-	Sten1	Sten1	Sten1	Sten1	Sten1	-	-	Sten1	Sten1	Sten1	Sten1	-	-	Sten1	-	Sten1	Sten1	Sten1	Sten1	Sten1	Sten1	-	-	Sten1	-	-
AX-147217180	Aradu.A03	100096163	Sten2	-	-	-	-	-	-	-	-	-	-	-	-	-	-	-	-	-	-	-	-	-	-	-	-	-	-	-	-	-	-	-	-	-	-	-	-	-	-	-	-	-	-	-	-	-	-
AX-147217191	Aradu.A03	100932532	Sten2	-	-	-	-	-	-	-	-	-	-	-	-	-	-	-	-	-	-	-	-	-	-	-	-	-	-	-	-	-	-	-	-	-	-	-	-	-	-	-	-	-	-	-	-	-	-
AX-176794257	Aradu.A03	103319854	-	-	-	-	-	-	-	-	-	-	-	-	-	-	-	-	-	-	-	-	-	-	-	-	-	-	-	-	-	-	-	-	-	-	-	-	-	-	-	-	-	-	-	-	-	-	-
AX-176812740	Aradu.A03	105399156	-	-	-	-	-	-	-	-	-	-	-	-	-	-	-	-	-	-	-	-	-	-	-	-	-	-	-	-	-	-	-	-	-	-	-	-	-	-	-	-	-	-	-	-	-	-	-
AX-176803961	Aradu.A03	105428219	-	-	-	-	-	-	-	-	-	-	-	-	-	-	-	-	-	-	-	-	-	-	-	-	-	-	-	-	-	-	-	-	-	-	-	-	-	-	-	-	-	-	-	-	-	-	-
AX-147217299	Aradu.A03	108830624	Sten1	-	-	-	-	-	-	-	-	-	-	-	-	-	-	-	-	-	-	-	-	-	-	-	-	-	-	-	-	-	-	-	-	-	-	-	-	-	-	-	-	-	-	-	-	-	-
AX-147217342	Aradu.A03	110293559	Sten2	-	-	-	-	-	-	-	-	-	-	-	-	-	-	-	-	-	-	-	-	-	-	-	-	-	-	-	-	-	-	-	-	-	-	-	-	-	-	-	-	-	-	-	-	-	-
AX-176792070	Aradu.A03	112869336	Sten2	-	-	-	-	-	-	-	-	-	-	-	-	-	-	-	-	-	-	-	-	-	-	-	-	-	-	-	-	-	-	-	-	-	-	-	-	-	-	-	-	-	-	-	-	-	-
AX-147217486	Aradu.A03	115670557	Sten2	-	-	-	-	-	-	-	-	-	-	-	-	-	-	-	-	-	-	-	-	-	-	-	-	-	-	-	-	-	-	-	-	-	-	-	-	-	-	-	-	-	-	-	-	-	-
AX-147217578	Aradu.A03	117747708	Sten1	-	-	-	-	-	-	-	-	-	-	-	-	-	-	-	-	-	-	-	-	-	-	-	-	-	-	-	-	-	-	-	-	-	-	-	-	-	-	-	-	-	-	-	-	-	-
AX-176811039	Aradu.A03	118006557	Sten2	-	-	-	-	-	-	-	-	-	-	-	-	-	-	-	-	-	-	-	-	-	-	-	-	-	-	-	-	-	-	-	-	-	-	-	-	-	-	-	-	-	-	-	-	-	-
AX-147217602	Aradu.A03	118027452	Sten2	-	-	-	-	-	-	-	-	-	-	-	-	-	-	-	-	-	-	-	-	-	-	-	-	-	-	-	-	-	-	-	-	-	-	-	-	-	-	-	-	-	-	-	-	-	-
AX-147217603	Aradu.A03	118029011	Sten1	-	-	-	-	-	-	-	-	-	-	-	-	-	-	-	-	-	-	-	-	-	-	-	-	-	-	-	-	-	-	-	-	-	-	-	-	-	-	-	-	-	-	-	-	-	-
AX-147217621	Aradu.A03	118410190	Sten2	-	-	-	-	-	-	-	-	-	-	-	-	-	-	-	-	-	-	-	-	-	-	-	-	-	-	-	-	-	-	-	-	-	-	-	-	-	-	-	-	-	-	-	-	-	-
AX-147217666	Aradu.A03	119191245	Sten2	-	-	-	-	-	-	-	-	-	-	-	-	-	-	-	-	-	-	-	-	-	-	-	-	-	-	-	-	-	-	-	-	-	-	-	-	-	-	-	-	-	-	-	-	-	-
AX-147217690	Aradu.A03	119760138	Sten2	-	-	-	-	-	-	-	-	-	-	-	-	-	-	-	-	-	-	-	-	-	-	-	-	-	-	-	-	-	-	-	-	-	-	-	-	-	-	-	-	-	-	-	-	-	-
AX-176814835	Aradu.A03	120779244	-	-	-	-	-	-	-	-	-	-	-	-	-	-	-	-	-	-	-	-	-	-	-	-	-	-	-	-	-	-	-	-	-	-	-	-	-	-	-	-	-	-	-	-	-	-	-
AX-147217893	Aradu.A03	124388226	Sten1	-	-	-	-	-	-	-	-	-	-	-	-	-	-	-	-	-	-	-	-	-	-	-	-	-	-	-	-	-	-	-	-	-	-	-	-	-	-	-	-	-	-	-	-	-	-
AX-176800613	Aradu.A03	124936689	-	-	-	-	-	-	-	-	-	-	-	-	-	-	-	-	-	-	-	-	-	-	-	-	-	-	-	-	-	-	-	-	-	-	-	-	-	-	-	-	-	-	-	-	-	-	-
AX-147218000	Aradu.A03	125668369	Sten2	-	-	-	-	-	-	-	-	-	-	-	-	-	-	-	-	-	-	-	-	-	-	-	-	-	-	-	-	-	-	-	-	-	-	-	-	-	-	-	-	-	-	-	-	-	-
AX-147218048	Aradu.A03	126684767	Sten2	-	-	-	-	-	-	-	-	-	-	-	-	-	-	-	-	-	-	-	-	-	-	-	-	-	-	-	-	-	-	-	-	-	-	-	-	-	-	-	-	-	-	-	-	-	-
AX-147218077	Aradu.A03	127096366	Sten2	-	-	-	-	-	-	-	-	-	-	-	-	-	-	-	-	-	-	-	-	-	-	-	-	-	-	-	-	-	-	-	-	-	-	-	-	-	-	-	-	-	-	-	-	-	-
AX-147218089	Aradu.A03	127285279	Sten1	-	-	-	-	-	-	-	-	-	-	-	-	-	-	-	-	-	-	-	-	-	-	-	-	-	-	-	-	-	-	-	-	-	-	-	-	-	-	-	-	-	-	-	-	-	-
AX-147218118	Aradu.A03	127612693	Sten2	-	-	-	-	-	-	-	-	-	-	-	-	-	-	-	-	-	-	-	-	-	-	-	-	-	-	-	-	-	-	-	-	-	-	-	-	-	-	-	-	-	-	-	-	-	-
AX-147218132	Aradu.A03	127785012	Sten2	-	-	-	-	-	-	-	-	-	-	-	-	-	-	-	-	-	-	-	-	-	-	-	-	-	-	-	-	-	-	-	-	-	-	-	-	-	-	-	-	-	-	-	-	-	-
AX-147218152	Aradu.A03	128169984	Sten2	-	-	-	-	-	-	-	-	-	-	-	-	-	-	-	-	-	-	-	-	-	-	-	-	-	-	-	-	-	-	-	-	-	-	-	-	-	-	-	-	-	-	-	-	-	-
AX-147218253	Aradu.A03	129126195	-	-	-	-	-	-	-	-	-	-	-	-	-	-	-	-	-	-	-	-	-	-	-	-	-	-	-	-	-	-	-	-	-	-	-	-	-	-	-	-	-	-	-	-	-	-	-
AX-176816506	Aradu.A03	129244646	Sten1	-	-	-	-	Sten1	-	Sten1	-	-	-	-	-	-	-	-	-	-	-	-	-	-	-	-	-	-	-	-	-	-	-	-	-	Sten1	-	-	-	-	-	-	-	-	-	-	-	Sten1	-
AX-147218304	Aradu.A03	129649608	Sten1	-	-	-	-	-	-	-	-	-	-	-	-	-	-	-	-	-	-	-	-	-	-	-	-	-	-	-	-	-	-	-	-	-	-	-	-	-	-	-	-	-	-	-	-	-	-
AX-147218365	Aradu.A03	130403989	Sten2	-	-	-	-	-	-	-	-	-	-	-	-	-	-	-	-	-	-	-	-	-	-	-	-	-	-	-	-	-	-	-	-	-	-	-	-	-	-	-	-	-	-	-	-	-	-
AX-147218409	Aradu.A03	130991357	Sten2	-	-	-	-	-	-	-	-	-	-	-	-	-	-	-	-	-	-	Sten1	-	Sten1	-	Sten1	-	Sten1	-	-	-	Sten2	-	-	-	-	-	-	-	Sten1	-	-	-	-	-	-	Sten1	-	-
AX-147218439	Aradu.A03	131460394	Sten2	-	-	-	-	-	-	-	-	-	-	-	-	-	-	-	-	-	-	Sten1	-	Sten1	-	Sten1	-	Sten1	-	Sten2	-	Sten2	-	Sten2	-	Sten1	-	-	-	Sten2	Sten1	-	-	-	-	-	-	-	-
AX-147218442	Aradu.A03	131479751	Sten2	-	-	-	-	-	-	-	-	-	-	-	-	-	-	-	-	-	-	Sten1	-	Sten1	-	Sten1	-	Sten1	-	Sten2	-	Sten2	-	Sten2	-	Sten1	-	-	-	Sten2	Sten1	-	-	-	-	-	-	-	-
AX-147218446	Aradu.A03	131522694	Sten2	-	-	-	-	-	-	-	-	-	-	-	-	-	-	-	-	-	-	Sten1	-	Sten1	-	Sten1	-	Sten1	-	Sten2	Sten1	Sten2	-	Sten2	-	Sten1	-	-	-	Sten2	Sten1	-	-	-	-	-	-	-	-
AX-147218483	Aradu.A03	131858812	Sten2	-	-	-	-	-	-	-	-	-	-	-	-	-	-	-	-	-	-	Sten1	-	Sten1	-	Sten1	-	Sten1	-	Sten2	-	Sten2	-	Sten2	-	Sten1	-	-	-	Sten2	Sten1	-	-	-	-	-	-	-	-
AX-176793476	Aradu.A03	132068349	Sten1	-	-	-	-	-	-	-	-	-	-	-	-	-	-	-	-	-	-	-	-	-	-	-	-	-	-	-	-	-	-	-	-	-	-	-	-	-	-	-	-	-	-	-	-	-	-
AX-147218506	Aradu.A03	132428208	Sten2	-	-	-	-	-	-	-	-	-	-	-	-	-	-	-	-	-	-	Sten1	-	Sten1	-	Sten1	-	Sten1	-	Sten1	-	Sten2	-	Sten2	-	Sten1	-	-	-	Sten2	Sten1	-	-	-	-	-	-	-	-
AX-176812123	Aradu.A03	132505845	-	-	-	-	-	-	-	-	-	-	-	-	-	-	-	-	-	-	-	-	-	-	-	-	-	-	-	-	-	-	-	-	-	-	-	-	-	-	-	-	-	-	-	-	-	-	-
AX-176820083	Aradu.A03	132658592	Sten1	-	-	-	-	-	-	-	-	-	-	-	-	-	-	-	-	-	-	Sten1	-	Sten1	-	Sten1	-	Sten1	-	Sten1	-	Sten1	-	Sten1	-	Sten1	-	-	-	Sten1	Sten1	-	-	-	-	-	-	-	-
AX-147218617	Aradu.A03	133464199	Sten2	-	-	-	-	-	-	-	-	-	-	-	-	-	-	-	-	-	-	Sten1	-	Sten1	-	Sten1	-	Sten1	-	Sten1	-	Sten2	-	Sten2	-	Sten1	-	-	-	Sten2	Sten1	-	-	-	-	-	-	-	-
AX-176814514	Aradu.A03	134115820	Sten1	-	-	-	-	-	-	-	-	-	-	-	-	-	-	-	-	-	-	-	-	-	-	-	-	-	-	-	-	-	-	-	-	-	-	-	-	-	-	-	-	-	-	-	-	-	-
AX-147218722	Aradu.A03	134465142	-	-	-	-	-	-	-	-	-	-	-	-	-	-	-	-	-	-	-	-	-	-	-	-	-	-	-	-	-	-	-	-	-	-	-	-	-	-	-	-	-	-	-	-	-	-	-
AX-147218728	Aradu.A03	134516054	-	-	-	-	-	-	-	-	-	-	-	-	-	-	-	-	-	-	-	Sten1	-	Sten1	-	Sten1	-	-	-	-	-	Sten1	-	Sten1	-	Sten1	-	-	-	Sten1	Sten1	-	-	-	-	-	-	-	-
AX-147218741	Aradu.A03	134818517	Sten2	-	-	-	-	-	-	-	-	-	-	-	-	-	-	-	-	Sten1	-	Sten1	-	Sten1	-	Sten1	-	Sten1	-	Sten1	-	Sten2	-	Sten2	-	Sten1	-	-	-	Sten2	Sten1	-	-	-	-	-	-	-	-
AX-147218747	Aradu.A04	105953	Sten2	-	-	Sten1	-	Sten2	-	Sten2	-	Sten1	-	Sten2	-	Sten1	-	Sten1	-	Sten1	-	Sten1	-	Sten1	-	Sten2	-	Sten2	-	-	-	Sten1	-	Sten1	-	Sten2	-	Sten2	-	Sten2	-	Sten1	-	Sten1	-	Sten1	-	-	Sten1
AX-147218752	Aradu.A04	162912	Sten2	-	-	Sten1	-	Sten2	-	Sten2	-	Sten1	-	Sten2	-	Sten1	-	Sten1	-	Sten1	-	Sten1	-	Sten1	-	Sten2	-	Sten2	-	-	-	Sten1	-	Sten1	-	Sten2	-	Sten2	-	Sten2	-	Sten1	-	Sten1	-	Sten1	-	-	Sten1
AX-147218758	Aradu.A04	186370	Sten2	-	-	Sten1	-	Sten2	-	Sten2	-	Sten1	-	Sten2	-	Sten1	-	Sten1	-	Sten1	-	Sten1	-	Sten1	-	Sten2	-	Sten2	-	-	-	Sten1	-	Sten1	-	Sten2	-	Sten2	-	Sten2	-	Sten1	-	Sten1	-	Sten1	-	-	Sten1
AX-147246426	Aradu.A04	376077	Sten2	-	-	Sten1	-	Sten2	-	Sten2	-	Sten1	-	Sten2	-	Sten1	-	Sten1	-	Sten1	-	Sten1	-	Sten1	-	Sten2	-	Sten2	-	-	-	Sten1	-	Sten1	-	Sten2	-	Sten2	-	Sten2	-	Sten1	-	Sten1	-	Sten1	-	-	Sten1
AX-147218845	Aradu.A04	814313	-	-	-	-	-	-	-	-	-	-	-	-	-	-	-	-	-	-	-	-	-	-	-	-	-	-	-	-	-	-	-	-	-	-	-	-	-	-	-	-	-	-	-	-	-	-	-
AX-147218852	Aradu.A04	841579	Sten2	-	-	Sten1	-	Sten1	-	Sten2	-	Sten1	-	Sten1	-	Sten1	-	Sten1	-	Sten1	Sten1	Sten1	Sten1	Sten1	Sten1	Sten2	Sten1	Sten2	Sten1	-	Sten1	Sten1	Sten1	Sten1	-	Sten2	Sten2	Sten2	Sten1	Sten2	Sten1	-	-	-	-	Sten1	-	Sten1	Sten1
AX-147218905	Aradu.A04	1330996	Sten2	-	-	Sten1	-	Sten1	-	Sten2	-	Sten1	-	Sten1	-	Sten1	-	Sten1	-	Sten1	Sten1	Sten1	Sten1	Sten1	Sten1	Sten2	Sten1	Sten2	Sten1	Sten1	Sten1	Sten1	Sten1	Sten1	-	Sten1	Sten2	Sten2	Sten1	Sten2	Sten1	-	-	-	-	Sten1	-	Sten1	Sten1
AX-147218913	Aradu.A04	1362368	Sten2	-	-	Sten1	-	Sten1	-	Sten2	-	Sten1	-	Sten1	-	Sten1	-	Sten1	-	Sten1	Sten1	Sten1	Sten1	Sten1	Sten1	Sten2	Sten1	Sten2	Sten1	Sten1	Sten1	Sten1	Sten1	Sten1	-	Sten1	Sten2	Sten1	Sten1	Sten2	Sten1	-	-	-	-	Sten1	-	Sten1	Sten1
AX-147218916	Aradu.A04	1428407	Sten2	-	-	Sten1	-	Sten1	-	Sten2	-	Sten1	-	Sten1	-	Sten1	-	Sten1	-	Sten1	Sten1	Sten1	Sten1	Sten1	Sten1	Sten2	Sten1	Sten2	Sten1	Sten1	Sten1	Sten1	Sten1	Sten1	-	Sten1	Sten2	Sten2	Sten1	Sten2	Sten1	-	-	-	-	Sten1	-	Sten1	Sten1
AX-147218960	Aradu.A04	1903375	Sten2	-	-	Sten1	-	Sten1	-	Sten2	-	Sten1	-	Sten1	-	Sten1	-	Sten1	-	Sten1	Sten1	Sten1	Sten1	Sten1	Sten1	Sten2	Sten2	Sten2	Sten2	Sten1	Sten1	Sten1	Sten1	Sten1	-	Sten1	-	Sten2	Sten1	Sten2	Sten1	-	-	-	-	Sten1	-	Sten1	Sten1
AX-147218990	Aradu.A04	2341583	Sten2	-	-	Sten1	-	Sten1	-	Sten2	-	Sten1	-	Sten1	-	Sten2	-	Sten2	-	Sten1	Sten1	Sten1	Sten1	Sten1	Sten1	Sten2	Sten2	Sten2	Sten2	Sten1	Sten1	Sten1	Sten1	Sten1	-	Sten1	Sten2	Sten2	Sten1	Sten2	Sten1	-	-	-	-	Sten1	-	Sten1	Sten1
AX-147219040	Aradu.A04	2755924	Sten2	-	-	Sten1	-	Sten1	-	Sten2	-	Sten1	-	Sten1	-	Sten2	-	Sten2	-	Sten1	Sten1	Sten1	Sten1	Sten1	Sten1	Sten2	Sten2	Sten2	Sten2	Sten1	Sten1	Sten1	Sten1	Sten1	-	Sten1	Sten2	Sten2	Sten1	Sten2	Sten1	-	-	-	-	Sten1	-	Sten1	Sten1
AX-147219071	Aradu.A04	2986913	Sten1	-	-	Sten1	-	Sten1	-	Sten2	-	Sten1	-	Sten1	-	Sten2	-	Sten2	-	Sten1	Sten1	Sten1	Sten1	Sten1	Sten1	Sten2	Sten2	Sten2	Sten2	Sten1	Sten1	Sten1	Sten1	Sten1	-	Sten1	Sten2	Sten1	Sten1	Sten2	Sten1	Sten1	-	Sten1	-	Sten1	-	Sten1	Sten1
AX-147219075	Aradu.A04	3019208	Sten2	-	-	Sten1	-	Sten1	-	Sten2	-	Sten1	-	Sten1	-	Sten2	-	Sten2	-	Sten1	Sten1	Sten1	Sten1	Sten1	Sten1	Sten2	Sten2	Sten2	Sten2	Sten1	Sten1	Sten1	Sten1	Sten1	-	Sten1	Sten2	Sten2	Sten1	Sten2	Sten1	Sten1	-	Sten1	-	Sten1	-	Sten1	Sten1
AX-147219127	Aradu.A04	3517899	Sten2	-	Sten1	Sten1	-	Sten1	Sten1	Sten2	-	Sten1	-	Sten1	Sten1	Sten2	Sten1	Sten2	-	Sten1	Sten1	Sten1	Sten1	Sten1	Sten1	Sten2	Sten2	Sten2	Sten2	Sten1	Sten1	Sten1	Sten1	Sten1	-	Sten1	Sten1	Sten2	Sten1	Sten2	Sten2	Sten1	Sten2	Sten1	-	Sten1	Sten2	Sten1	Sten1
AX-147219138	Aradu.A04	3712941	Sten2	-	Sten1	Sten1	-	Sten1	Sten1	Sten2	-	Sten1	-	Sten1	Sten1	Sten2	Sten1	Sten2	-	Sten1	Sten1	Sten1	Sten1	Sten1	Sten1	Sten2	Sten2	Sten2	Sten2	Sten1	Sten1	Sten1	Sten1	Sten1	-	Sten1	Sten1	Sten2	Sten1	Sten2	Sten2	Sten1	Sten2	Sten1	-	Sten1	Sten2	Sten1	Sten1
AX-147246852	Aradu.A04	4182894	Sten2	-	Sten1	Sten1	-	Sten1	Sten1	-	-	-	-	Sten1	Sten1	Sten2	Sten1	Sten2	-	Sten1	Sten1	Sten1	Sten1	Sten1	Sten1	Sten2	Sten1	Sten2	Sten1	Sten1	Sten1	Sten1	Sten1	Sten1	-	Sten1	Sten1	Sten2	Sten1	Sten1	Sten2	-	-	Sten1	-	Sten1	Sten2	Sten1	Sten1
AX-147219161	Aradu.A04	4216107	Sten2	-	Sten1	Sten1	-	Sten1	Sten1	Sten2	-	Sten2	-	Sten1	Sten1	Sten2	Sten1	Sten2	-	Sten1	Sten1	Sten1	Sten1	Sten1	-	Sten2	Sten1	Sten2	Sten1	Sten1	Sten1	Sten1	Sten1	Sten1	-	Sten1	Sten1	Sten2	Sten1	Sten2	Sten2	Sten1	Sten2	Sten1	-	Sten1	Sten2	Sten1	Sten1
AX-147219234	Aradu.A04	5649484	-	-	-	-	-	-	-	-	-	-	-	-	-	-	-	-	-	-	-	-	-	-	-	-	-	-	-	-	-	-	-	-	-	-	-	-	-	-	-	-	-	-	-	-	-	-	-
AX-147219235	Aradu.A04	5659551	Sten2	-	Sten1	Sten1	-	Sten1	Sten1	Sten2	-	Sten2	-	Sten1	Sten1	Sten2	Sten1	Sten2	-	Sten1	Sten1	Sten1	Sten1	Sten1	Sten1	Sten2	Sten1	Sten2	Sten1	Sten1	Sten1	Sten1	Sten1	Sten1	-	Sten1	Sten1	Sten2	Sten1	Sten2	Sten2	Sten1	Sten2	Sten1	-	Sten1	Sten2	Sten1	Sten1
AX-147219264	Aradu.A04	6680088	Sten2	-	Sten1	Sten1	-	Sten1	Sten1	Sten2	-	Sten2	-	Sten1	Sten1	Sten2	Sten1	Sten2	-	-	Sten1	Sten1	Sten1	-	Sten1	Sten2	Sten1	Sten2	Sten1	Sten1	Sten2	Sten1	Sten1	Sten1	-	Sten1	Sten1	Sten2	Sten2	Sten2	Sten2	Sten1	Sten2	Sten1	-	Sten1	Sten2	Sten1	Sten1
AX-147219321	Aradu.A04	7370876	Sten2	-	Sten1	-	-	Sten1	Sten1	Sten1	-	Sten2	-	Sten1	Sten1	Sten2	Sten1	Sten2	-	Sten1	Sten1	Sten1	Sten1	-	Sten1	Sten2	Sten1	Sten2	Sten1	Sten1	Sten2	Sten1	Sten1	Sten1	-	Sten1	Sten1	Sten2	Sten2	Sten2	Sten2	Sten1	Sten2	Sten1	-	Sten1	Sten2	Sten1	Sten1
AX-147219466	Aradu.A04	10403187	Sten2	-	Sten1	Sten1	-	Sten1	Sten1	Sten1	-	Sten2	-	-	Sten1	Sten2	Sten1	Sten2	-	-	Sten1	Sten1	Sten1	-	Sten1	Sten2	Sten1	Sten2	Sten1	Sten1	Sten2	Sten1	Sten1	Sten1	-	Sten1	Sten1	Sten2	Sten1	Sten2	Sten2	Sten1	Sten2	Sten1	-	Sten1	Sten2	Sten1	Sten1
AX-147219503	Aradu.A04	12230276	Sten2	-	Sten1	Sten1	-	Sten1	Sten1	Sten1	-	Sten2	-	-	Sten1	Sten2	Sten1	Sten2	-	-	Sten1	Sten1	-	-	Sten1	Sten2	Sten1	Sten2	Sten1	Sten1	Sten2	Sten1	Sten1	Sten1	-	Sten1	Sten1	Sten2	-	-	Sten2	Sten1	Sten2	Sten1	-	Sten1	Sten2	Sten1	Sten1
AX-147219517	Aradu.A04	12779729	Sten2	-	Sten1	Sten1	-	Sten1	Sten1	Sten1	-	Sten2	-	-	Sten1	Sten2	Sten1	Sten2	-	-	Sten1	-	-	-	Sten1	Sten2	Sten1	Sten2	Sten1	Sten1	Sten2	Sten1	Sten2	Sten1	-	Sten1	Sten1	Sten2	-	Sten2	Sten2	Sten1	Sten2	Sten1	-	Sten1	Sten2	Sten1	Sten1
AX-147219535	Aradu.A04	13743326	Sten2	-	Sten1	Sten1	-	Sten1	Sten1	Sten1	-	-	-	-	Sten1	Sten2	Sten1	Sten2	-	Sten1	Sten1	Sten1	-	-	-	Sten2	Sten1	Sten2	Sten1	Sten1	Sten2	Sten1	Sten2	Sten1	-	Sten1	Sten1	Sten2	Sten1	Sten2	Sten2	Sten1	Sten2	Sten1	-	Sten1	Sten2	Sten1	Sten1
AX-176817088	Aradu.A04	15704111	Sten2	-	Sten1	Sten1	-	-	Sten1	Sten1	-	Sten2	-	-	Sten1	Sten2	Sten1	Sten2	-	-	Sten1	Sten1	-	-	-	Sten2	Sten1	-	Sten1	Sten1	Sten1	Sten1	Sten1	Sten1	-	-	Sten1	-	-	Sten2	-	Sten1	-	Sten1	-	Sten1	Sten1	Sten1	Sten1
AX-176794358	Aradu.A04	18231560	Sten1	-	-	-	-	-	-	-	-	-	-	-	-	-	-	-	-	-	-	-	-	-	-	-	-	-	-	-	-	-	-	-	-	-	-	-	-	-	-	-	-	-	-	-	-	-	-
AX-147219646	Aradu.A04	18406467	Sten2	-	Sten1	Sten1	-	Sten1	Sten1	Sten1	-	Sten2	-	-	Sten1	Sten2	Sten1	Sten2	-	-	Sten1	Sten1	-	-	Sten1	Sten2	Sten1	Sten2	Sten1	Sten1	Sten2	Sten1	Sten2	Sten1	-	Sten1	Sten1	Sten2	Sten1	Sten2	Sten2	Sten1	Sten2	Sten1	-	Sten1	Sten2	Sten1	Sten1
AX-147219761	Aradu.A04	26018057	Sten2	-	Sten1	Sten1	-	Sten1	Sten1	Sten1	-	Sten2	-	-	Sten1	Sten2	Sten1	Sten2	-	-	Sten1	Sten1	-	Sten1	Sten1	Sten2	Sten1	Sten2	Sten1	Sten1	Sten2	Sten1	Sten2	Sten1	-	Sten1	Sten1	Sten2	Sten1	Sten2	Sten2	Sten1	Sten2	Sten1	-	Sten1	Sten2	Sten1	Sten1
AX-176819555	Aradu.A04	29697050	Sten1	-	Sten1	-	-	-	Sten1	-	-	Sten1	-	-	-	Sten1	-	Sten1	-	-	-	Sten1	-	Sten1	Sten1	Sten1	-	Sten1	-	-	Sten1	-	Sten1	-	-	-	-	-	-	Sten1	Sten1	-	Sten1	-	-	Sten1	Sten1	-	-
AX-176794649	Aradu.A04	29697085	Sten2	-	Sten1	Sten1	-	Sten1	Sten1	Sten1	-	Sten1	-	-	Sten1	Sten2	Sten1	-	-	-	Sten1	Sten1	-	Sten1	-	Sten1	Sten1	Sten2	Sten1	Sten1	Sten1	Sten1	-	Sten1	-	Sten1	Sten1	Sten2	-	Sten1	-	Sten1	Sten1	Sten1	-	-	-	Sten1	Sten1
AX-147219833	Aradu.A04	31201580	Sten2	-	Sten1	Sten1	-	Sten1	Sten1	Sten1	-	Sten2	-	-	Sten1	Sten2	Sten1	Sten2	-	-	Sten1	Sten1	-	Sten1	Sten1	Sten2	Sten1	Sten2	Sten1	Sten1	Sten2	Sten1	Sten2	Sten1	-	Sten1	Sten1	Sten2	-	Sten2	Sten2	Sten1	Sten2	Sten1	-	Sten1	Sten2	Sten1	Sten1
AX-176793200	Aradu.A04	35343227	-	-	-	-	-	-	-	-	-	-	-	-	-	-	-	-	-	-	-	-	-	-	-	-	-	-	-	-	-	-	-	-	-	-	-	-	-	-	-	-	-	-	-	-	-	-	-
AX-147219924	Aradu.A04	39355923	-	-	-	-	-	-	-	-	-	-	-	-	-	-	-	-	-	-	-	-	-	-	-	-	-	-	-	-	-	-	-	-	-	-	-	-	-	-	-	-	-	-	-	-	-	-	-
AX-147219969	Aradu.A04	43910476	Sten2	-	Sten1	Sten1	-	Sten1	Sten1	Sten1	-	Sten2	-	-	Sten1	Sten2	Sten1	Sten2	-	-	Sten1	Sten1	-	Sten1	Sten1	Sten2	Sten1	Sten2	Sten1	Sten1	Sten2	Sten1	Sten2	Sten1	-	Sten1	Sten1	Sten1	Sten1	Sten2	Sten2	Sten1	Sten2	Sten1	-	Sten1	Sten2	Sten1	Sten1
AX-147219994	Aradu.A04	44691344	-	-	-	-	-	-	-	-	-	-	-	-	-	-	-	-	-	-	-	-	-	-	-	-	-	-	-	-	-	-	-	-	-	-	-	-	-	-	-	-	-	-	-	-	-	-	-
AX-176795801	Aradu.A04	45012391	-	-	-	-	-	-	-	-	-	-	-	-	-	-	-	-	-	-	-	-	-	-	-	-	-	-	-	-	-	-	-	-	-	-	-	-	-	-	-	-	-	-	-	-	-	-	-
AX-147247611	Aradu.A04	46297588	-	-	Sten1	Sten1	-	Sten1	Sten1	Sten1	-	Sten2	-	-	Sten1	Sten2	Sten1	Sten2	-	-	Sten1	Sten1	-	Sten1	Sten1	Sten2	Sten1	Sten2	Sten1	Sten1	Sten1	Sten1	Sten2	Sten1	-	Sten1	Sten1	-	-	Sten2	Sten2	Sten1	Sten2	Sten1	-	Sten1	Sten2	Sten1	Sten1
AX-176822168	Aradu.A04	50533675	-	-	-	-	-	-	-	-	-	-	-	-	-	-	-	-	-	-	-	-	-	-	-	-	-	-	-	-	-	-	-	-	-	-	-	-	-	-	-	-	-	-	-	-	-	-	-
AX-147220040	Aradu.A04	53185121	Sten2	-	Sten1	Sten1	-	Sten1	Sten1	Sten1	-	Sten2	-	-	Sten1	Sten2	Sten1	Sten2	-	-	Sten1	Sten1	-	Sten1	Sten1	Sten1	Sten1	Sten1	Sten1	Sten1	Sten2	Sten1	Sten2	-	-	Sten1	-	Sten1	Sten1	Sten2	Sten2	Sten1	Sten2	Sten1	-	Sten1	Sten2	Sten1	Sten1
AX-147220067	Aradu.A04	61632456	Sten2	-	Sten1	Sten1	-	Sten1	Sten1	Sten1	-	Sten2	-	-	Sten1	Sten2	Sten1	Sten2	-	-	Sten1	Sten1	-	Sten1	Sten1	-	Sten1	Sten2	Sten1	Sten1	Sten2	Sten1	Sten2	Sten1	-	Sten1	Sten1	Sten1	Sten1	Sten2	Sten2	Sten1	Sten2	Sten1	-	Sten1	Sten2	Sten1	Sten1
AX-176798038	Aradu.A04	61990112	-	-	-	-	-	-	-	-	-	-	-	-	-	-	-	-	-	-	-	-	-	-	-	-	-	-	-	-	-	-	-	-	-	-	-	-	-	-	-	-	-	-	-	-	-	-	-
AX-147220074	Aradu.A04	62753825	Sten2	-	Sten1	Sten1	-	Sten1	Sten1	Sten1	-	Sten2	-	-	Sten1	Sten2	Sten1	Sten2	-	Sten1	Sten1	Sten1	-	Sten1	Sten1	Sten1	Sten1	Sten1	Sten1	Sten1	Sten2	Sten1	Sten2	Sten1	-	Sten1	Sten1	Sten1	Sten1	Sten2	Sten2	Sten1	Sten2	Sten1	-	Sten1	Sten2	Sten1	Sten1
AX-176794277	Aradu.A04	71833835	Sten2	-	Sten1	-	-	Sten1	Sten1	Sten1	-	Sten2	-	-	Sten1	Sten2	Sten1	Sten2	-	-	Sten1	Sten1	-	-	-	Sten1	Sten1	Sten1	Sten1	Sten1	Sten1	Sten1	Sten2	Sten1	-	Sten1	Sten1	Sten1	Sten1	Sten2	Sten2	Sten1	Sten2	Sten1	-	Sten1	Sten2	-	Sten1
AX-176801614	Aradu.A04	72118706	-	-	Sten1	Sten1	-	Sten1	Sten1	Sten1	-	Sten2	-	-	Sten1	Sten2	Sten1	Sten2	-	-	Sten1	Sten1	-	Sten1	Sten2	Sten1	Sten1	-	Sten1	Sten1	-	Sten1	Sten1	Sten1	-	Sten1	Sten1	Sten1	Sten1	Sten1	-	Sten1	-	Sten1	-	Sten1	Sten2	Sten1	Sten1
AX-147220154	Aradu.A04	76565873	Sten2	-	Sten1	Sten1	-	Sten1	Sten1	Sten1	-	Sten2	-	-	Sten1	Sten2	Sten1	Sten2	-	Sten1	Sten1	Sten1	-	Sten1	Sten1	Sten2	Sten1	Sten2	Sten1	Sten1	Sten2	Sten1	Sten2	Sten1	-	Sten1	Sten1	Sten1	Sten1	Sten2	Sten2	Sten1	Sten2	Sten1	-	Sten1	Sten2	Sten1	Sten1
AX-147220181	Aradu.A04	78282956	-	-	-	-	-	-	-	-	-	-	-	-	-	-	-	-	-	-	-	-	-	-	-	-	-	-	-	-	-	-	-	-	-	-	-	Sten1	-	-	-	-	-	-	-	-	-	-	-
AX-147220197	Aradu.A04	80024591	Sten2	-	Sten1	Sten1	-	Sten1	Sten1	Sten1	-	Sten2	-	-	Sten1	Sten2	Sten1	Sten2	-	-	Sten1	Sten1	-	Sten1	Sten1	Sten2	Sten1	Sten2	Sten1	Sten1	Sten2	Sten1	Sten2	Sten1	-	Sten1	Sten1	Sten2	Sten1	-	Sten2	Sten1	Sten2	Sten1	-	Sten1	Sten2	Sten1	-
AX-147220228	Aradu.A04	82482114	-	-	-	-	-	-	-	-	-	-	-	-	-	-	-	-	-	-	-	-	-	-	-	-	-	-	-	-	-	-	-	-	-	-	-	-	-	-	-	-	-	-	-	-	-	-	-
AX-147220250	Aradu.A04	85249177	Sten2	-	Sten1	Sten1	-	Sten1	Sten1	Sten1	-	Sten2	-	-	Sten1	Sten2	Sten1	Sten2	-	-	Sten1	Sten1	-	Sten1	Sten1	Sten1	Sten1	Sten1	Sten1	Sten1	Sten2	Sten1	Sten2	Sten1	-	Sten1	Sten1	Sten1	-	Sten2	Sten2	Sten1	Sten2	Sten1	-	Sten1	Sten2	Sten1	Sten1
AX-147220275	Aradu.A04	88047543	-	-	Sten1	Sten1	-	Sten1	Sten1	Sten1	-	Sten2	-	-	Sten1	Sten2	Sten1	Sten2	-	-	Sten1	Sten1	-	Sten1	Sten1	Sten1	Sten1	Sten1	Sten1	Sten1	Sten2	Sten1	Sten2	Sten1	-	Sten1	Sten1	Sten1	Sten1	Sten2	Sten2	Sten1	Sten2	Sten1	-	Sten1	Sten2	Sten1	Sten1
AX-147220290	Aradu.A04	89924581	Sten2	-	Sten1	Sten1	-	-	Sten1	Sten1	-	Sten2	-	-	Sten1	Sten2	Sten1	Sten2	-	-	Sten1	Sten1	-	Sten1	Sten1	Sten1	Sten1	Sten1	Sten1	Sten1	Sten2	Sten1	Sten2	Sten1	-	Sten1	Sten1	Sten1	Sten1	Sten2	Sten2	Sten1	Sten2	Sten1	-	Sten1	Sten2	Sten1	Sten1
AX-176807447	Aradu.A04	90141686	-	-	-	-	-	-	-	-	-	-	-	-	-	-	-	-	-	-	-	-	-	-	-	-	-	-	-	-	-	-	-	-	-	-	-	-	-	-	-	-	-	-	-	-	-	-	-
AX-176817223	Aradu.A04	91804337	Sten2	-	Sten1	Sten1	-	Sten1	Sten1	Sten1	-	Sten2	-	-	Sten1	Sten2	Sten1	Sten2	-	-	Sten1	Sten1	-	Sten1	Sten1	Sten1	Sten1	Sten1	Sten1	Sten1	Sten2	Sten1	Sten2	Sten1	-	Sten1	Sten1	Sten1	Sten1	Sten2	Sten2	Sten1	Sten2	Sten1	-	Sten1	-	Sten1	Sten1
AX-176813726	Aradu.A04	92635030	Sten2	-	Sten1	Sten1	-	Sten1	Sten1	Sten1	-	Sten2	-	-	Sten1	Sten2	Sten1	Sten2	-	-	Sten1	Sten1	-	Sten1	Sten1	Sten1	Sten1	Sten1	Sten1	Sten1	Sten2	Sten1	Sten2	Sten1	-	Sten1	Sten1	Sten1	Sten1	Sten2	Sten2	Sten1	Sten2	Sten1	-	Sten1	Sten2	Sten1	Sten1
AX-147220329	Aradu.A04	92696031	Sten2	-	Sten1	Sten1	-	Sten1	Sten1	Sten1	-	Sten2	-	-	Sten1	Sten2	Sten1	Sten2	-	-	Sten1	Sten1	-	Sten1	Sten1	Sten1	Sten1	Sten1	Sten1	Sten1	Sten2	Sten1	Sten2	Sten1	-	Sten1	Sten1	Sten1	Sten1	-	Sten2	Sten1	Sten2	Sten1	-	Sten1	Sten2	Sten1	Sten1
AX-176819415	Aradu.A04	95000363	-	-	Sten1	Sten1	-	Sten1	Sten1	Sten1	-	Sten2	-	-	Sten1	Sten2	Sten1	Sten2	-	Sten1	Sten1	Sten1	-	Sten1	Sten1	Sten1	Sten1	Sten1	Sten1	Sten1	Sten2	Sten1	Sten2	Sten1	-	Sten1	Sten1	Sten1	Sten1	Sten2	Sten2	Sten1	Sten2	Sten1	-	Sten1	Sten2	Sten1	Sten1
AX-176800379	Aradu.A04	103831183	Sten1	-	Sten1	Sten1	-	Sten1	Sten1	Sten1	-	Sten1	-	-	Sten1	Sten1	Sten1	Sten1	-	Sten1	Sten1	Sten1	-	-	Sten1	Sten1	Sten1	Sten1	Sten1	Sten1	Sten1	Sten1	Sten1	Sten1	-	Sten1	Sten1	Sten1	Sten1	Sten1	Sten1	Sten1	Sten1	Sten1	-	Sten1	Sten1	Sten1	Sten1
AX-147220481	Aradu.A04	103964432	Sten2	-	Sten1	Sten1	-	Sten1	Sten1	Sten1	-	Sten2	-	-	Sten1	Sten2	Sten1	Sten2	-	Sten1	Sten1	Sten1	-	Sten1	Sten1	Sten1	Sten1	Sten1	Sten1	Sten1	Sten2	Sten1	Sten2	Sten1	-	Sten1	Sten1	Sten1	Sten1	Sten2	Sten2	Sten1	Sten2	Sten1	-	Sten1	Sten2	Sten1	Sten1
AX-147220500	Aradu.A04	104172441	Sten2	-	Sten1	Sten1	-	Sten1	Sten1	Sten1	-	Sten2	-	-	Sten1	Sten2	Sten1	Sten2	-	Sten1	Sten1	Sten1	-	Sten1	Sten1	Sten1	Sten1	Sten1	Sten1	Sten1	Sten2	Sten1	Sten2	Sten1	-	Sten1	Sten1	Sten1	-	Sten2	Sten2	Sten1	Sten2	Sten1	-	Sten1	Sten2	Sten1	Sten1
AX-176807803	Aradu.A04	105896594	Sten1	-	-	-	-	-	-	-	-	Sten1	-	-	-	Sten1	-	Sten1	-	-	-	-	-	-	-	-	-	-	-	-	Sten1	-	Sten1	-	-	-	-	-	-	Sten1	Sten1	-	Sten1	-	-	-	Sten1	-	-
AX-176807781	Aradu.A04	107069698	-	-	-	-	-	-	-	-	-	-	-	-	-	-	-	-	-	-	-	-	-	-	-	-	-	-	-	-	-	-	-	-	-	-	-	-	-	-	-	-	-	-	-	-	-	-	-
AX-147220633	Aradu.A04	108230713	Sten2	-	Sten1	Sten1	-	Sten1	Sten1	Sten1	-	Sten2	-	-	Sten1	Sten2	Sten1	Sten2	-	Sten1	Sten1	Sten1	-	Sten1	Sten1	Sten1	Sten1	Sten1	Sten1	-	Sten2	Sten1	Sten2	Sten1	-	Sten2	Sten1	Sten1	Sten1	Sten2	Sten2	Sten1	Sten2	Sten1	-	-	Sten2	Sten1	Sten1
AX-147220708	Aradu.A04	110684871	Sten2	-	Sten1	Sten1	-	Sten1	Sten1	Sten1	-	Sten2	-	-	Sten1	Sten2	Sten1	Sten2	-	Sten1	Sten1	Sten2	-	Sten1	Sten1	Sten1	Sten1	Sten1	Sten1	-	Sten2	Sten1	Sten2	Sten1	-	Sten2	Sten1	Sten1	Sten1	Sten2	Sten2	Sten1	Sten2	Sten1	-	-	Sten2	Sten1	Sten1
AX-176812660	Aradu.A04	111718457	-	-	Sten1	Sten1	-	Sten1	Sten1	Sten1	-	Sten2	-	-	Sten1	Sten2	Sten1	Sten2	-	Sten1	Sten1	Sten2	-	Sten1	-	-	Sten1	Sten1	Sten1	-	-	Sten1	Sten2	Sten1	-	Sten2	Sten1	Sten2	-	Sten2	Sten1	Sten1	Sten2	-	-	-	-	Sten1	Sten1
AX-147220775	Aradu.A04	112403290	Sten2	-	Sten1	Sten1	-	Sten1	Sten1	Sten1	-	Sten2	-	-	Sten1	Sten2	Sten1	Sten2	-	Sten1	Sten1	Sten2	-	Sten1	Sten2	Sten1	Sten1	Sten1	Sten1	-	Sten1	Sten1	Sten2	Sten1	-	Sten2	Sten1	Sten1	Sten1	Sten2	Sten1	Sten1	Sten2	Sten1	-	-	Sten2	Sten1	Sten1
AX-147248335	Aradu.A04	112468907	Sten2	-	Sten1	Sten1	-	Sten1	Sten1	Sten1	-	-	-	-	Sten1	Sten2	Sten1	Sten1	-	Sten1	Sten1	Sten2	-	Sten1	Sten1	Sten1	Sten1	Sten1	Sten1	-	Sten1	Sten1	Sten2	Sten1	-	Sten2	Sten1	-	Sten1	-	Sten1	Sten1	Sten2	Sten1	-	-	Sten2	Sten1	Sten1
AX-147220802	Aradu.A04	112877017	Sten2	-	-	Sten1	-	Sten1	Sten1	Sten1	-	Sten2	-	-	Sten1	Sten1	Sten1	Sten1	-	Sten1	Sten1	Sten2	Sten1	Sten1	Sten1	Sten1	Sten1	Sten1	Sten1	-	Sten1	Sten1	Sten2	Sten1	-	Sten2	Sten1	Sten1	Sten1	Sten2	Sten1	Sten1	Sten2	Sten1	-	-	Sten2	Sten1	Sten1
AX-147248386	Aradu.A04	113653210	Sten2	-	-	Sten1	-	Sten1	Sten1	Sten1	-	-	-	-	-	Sten1	Sten1	Sten1	-	Sten2	Sten1	-	Sten1	Sten1	Sten1	Sten1	Sten1	Sten1	Sten1	-	-	Sten1	-	Sten1	-	-	Sten1	-	-	Sten2	Sten1	Sten1	Sten2	Sten1	-	-	Sten2	Sten1	Sten1
AX-147220883	Aradu.A04	114359220	Sten2	-	-	Sten1	-	Sten1	Sten1	Sten1	-	Sten2	-	-	Sten1	Sten1	Sten1	Sten1	-	Sten1	Sten1	Sten2	Sten1	Sten1	Sten2	Sten1	Sten1	Sten1	Sten1	-	Sten1	Sten1	Sten1	Sten1	-	Sten2	Sten1	Sten1	Sten1	-	Sten1	Sten1	Sten2	Sten1	-	-	Sten2	Sten1	Sten1
AX-176820963	Aradu.A04	115830024	Sten2	-	-	Sten1	-	Sten1	Sten1	Sten1	-	Sten2	-	-	Sten1	Sten1	Sten1	Sten1	-	Sten1	Sten1	Sten2	Sten1	Sten1	-	Sten1	Sten1	Sten1	Sten1	-	Sten1	Sten1	Sten1	Sten1	-	Sten2	Sten1	Sten1	Sten1	Sten2	Sten1	Sten1	Sten2	Sten1	-	-	Sten2	Sten1	-
AX-147220968	Aradu.A04	116352006	-	-	-	-	-	-	-	-	-	-	-	-	-	-	-	-	-	-	-	-	-	-	-	-	-	-	-	-	-	-	-	-	-	-	-	-	-	-	-	-	-	-	-	-	-	-	-
AX-147221103	Aradu.A04	118778510	Sten2	-	-	Sten1	-	Sten2	Sten1	Sten1	-	Sten2	-	-	Sten1	Sten1	Sten2	Sten1	-	Sten2	Sten1	Sten2	Sten1	Sten1	Sten1	Sten1	Sten1	Sten1	Sten1	-	Sten1	Sten1	Sten1	Sten1	-	Sten2	Sten1	-	-	Sten2	Sten1	Sten1	-	Sten1	-	-	Sten2	Sten2	-
AX-147221108	Aradu.A04	118822674	-	-	-	-	-	-	-	-	-	-	-	-	-	-	-	-	-	-	-	-	-	-	-	-	-	-	-	-	-	-	-	-	-	-	-	-	-	-	-	-	-	-	-	-	-	-	-
AX-176796255	Aradu.A04	119011071	-	-	-	-	-	-	-	-	-	-	-	-	-	-	-	-	-	-	-	-	-	-	-	-	-	-	-	-	-	-	-	-	-	-	-	-	-	-	-	-	-	-	-	-	-	-	-
AX-147221200	Aradu.A04	119664996	Sten1	-	-	-	-	-	-	-	-	-	-	-	-	-	Sten1	-	-	-	-	-	-	-	-	-	-	-	-	-	-	-	-	-	-	-	-	-	-	-	-	-	-	-	-	-	-	-	-
AX-147221205	Aradu.A04	119691567	Sten2	-	-	Sten1	-	Sten2	Sten1	Sten1	-	Sten2	-	-	Sten1	-	Sten2	-	-	Sten2	Sten1	Sten2	Sten1	Sten1	-	Sten1	Sten1	Sten1	Sten1	-	Sten1	Sten1	Sten1	Sten1	-	Sten2	Sten1	-	Sten1	Sten2	Sten1	Sten1	Sten2	Sten1	-	-	Sten2	Sten1	-
AX-176791878	Aradu.A04	120555571	Sten1	-	-	Sten1	-	Sten2	Sten1	Sten1	-	Sten2	-	Sten1	Sten1	-	Sten1	-	-	Sten1	Sten1	Sten2	Sten1	Sten1	Sten1	Sten1	Sten1	Sten1	Sten1	-	Sten1	Sten1	Sten1	Sten1	-	Sten2	Sten1	-	Sten1	Sten2	Sten1	Sten1	Sten2	Sten1	-	-	Sten2	Sten1	-
AX-176815295	Aradu.A04	120669932	Sten2	-	-	Sten1	-	Sten2	Sten1	Sten1	-	Sten2	-	Sten1	Sten1	-	Sten2	-	-	Sten2	-	Sten2	Sten1	Sten1	Sten1	-	Sten1	Sten1	Sten1	-	Sten1	Sten1	Sten1	Sten1	-	Sten2	Sten1	-	Sten1	Sten2	Sten1	Sten1	Sten2	Sten1	-	-	Sten2	Sten1	-
AX-176820308	Aradu.A04	120783536	-	-	-	-	-	-	-	-	-	-	-	-	-	-	Sten1	-	-	-	-	Sten1	-	-	-	Sten1	-	Sten1	-	-	-	-	-	Sten1	-	Sten1	-	-	-	Sten1	-	-	-	-	-	-	Sten1	-	-
AX-147221342	Aradu.A04	121133496	Sten2	-	-	-	-	-	Sten1	-	-	-	-	-	Sten1	-	Sten2	-	-	-	-	Sten2	-	Sten1	-	Sten1	-	Sten1	-	-	-	Sten1	-	Sten1	-	Sten2	-	-	-	Sten2	Sten1	-	Sten2	-	-	-	Sten2	-	-
AX-147221410	Aradu.A04	122540803	Sten2	-	-	-	-	-	-	-	-	-	-	-	-	-	-	-	-	-	-	Sten2	-	Sten1	-	Sten1	-	Sten1	-	-	-	Sten1	-	Sten1	-	Sten2	-	-	-	Sten2	Sten1	-	-	-	-	-	-	-	-
AX-176821676	Aradu.A05	343193	-	-	-	-	-	-	-	-	-	-	-	-	-	-	-	-	-	-	-	-	-	-	-	-	-	-	-	-	-	-	-	-	-	-	-	-	-	-	-	-	-	-	-	-	-	-	-
AX-147221467	Aradu.A05	1500438	Sten2	-	-	-	-	-	-	-	-	-	-	-	-	-	-	-	-	-	-	-	-	-	-	-	-	-	-	-	-	-	-	-	-	-	-	-	-	-	-	-	-	-	-	-	-	-	-
AX-147221510	Aradu.A05	2776748	Sten2	-	-	-	-	-	-	-	-	-	-	-	-	-	-	-	-	-	-	-	-	-	-	-	-	-	-	-	-	-	-	-	-	-	-	-	-	-	-	-	-	-	-	-	-	-	-
AX-147221511	Aradu.A05	2859361	Sten2	-	-	-	-	-	-	-	-	-	-	-	-	-	-	-	-	-	-	-	-	-	-	-	-	-	-	-	-	-	-	-	-	-	-	-	-	-	-	-	-	-	-	-	-	-	-
AX-176817390	Aradu.A05	3079338	Sten1	-	-	-	-	-	-	-	-	-	-	-	-	-	-	-	-	-	-	-	-	-	-	-	-	-	-	-	-	-	-	-	-	-	-	-	-	-	-	-	-	-	-	-	-	-	-
AX-176800141	Aradu.A05	3141021	-	-	-	-	-	-	-	-	-	-	-	-	-	-	-	-	-	-	-	-	-	-	-	-	-	-	-	-	-	-	-	-	-	-	-	-	-	-	-	-	-	-	-	-	-	-	-
AX-147249011	Aradu.A05	4294221	Sten1	-	-	-	-	-	-	-	-	-	-	-	-	-	-	-	-	-	-	-	-	-	-	-	-	-	-	-	-	-	-	-	-	-	-	-	-	-	-	-	-	-	-	-	-	-	-
AX-147221560	Aradu.A05	4536726	Sten2	-	-	-	-	-	-	-	-	-	-	-	-	-	-	-	-	-	-	-	-	-	-	-	-	-	-	-	-	-	-	-	-	-	-	-	-	-	-	-	-	-	-	-	-	-	-
AX-176791991	Aradu.A05	5435309	Sten1	-	-	-	-	-	-	-	-	-	-	-	-	-	-	-	-	-	-	-	-	-	-	-	-	-	-	-	-	-	-	-	-	-	-	-	-	-	-	-	-	-	-	-	-	-	-
AX-147221577	Aradu.A05	5669888	Sten2	-	-	-	-	-	-	-	-	-	-	-	-	-	-	-	-	-	-	-	-	-	-	-	-	-	-	-	-	-	-	-	-	-	-	-	-	-	-	-	-	-	-	-	-	-	-
AX-147221580	Aradu.A05	5802583	Sten2	-	-	-	-	-	-	-	-	-	-	-	-	-	-	-	-	-	-	-	-	-	-	-	-	-	-	-	-	-	-	-	-	-	-	-	-	-	-	-	-	-	-	-	-	-	-
AX-147221634	Aradu.A05	6930207	Sten2	-	-	-	-	-	-	-	-	-	-	-	-	-	-	-	-	-	-	-	-	-	-	-	-	-	-	-	-	-	-	-	-	-	-	-	-	-	-	-	-	-	-	-	-	-	-
AX-147221653	Aradu.A05	7294750	Sten2	-	-	-	-	-	-	-	-	-	-	-	-	-	-	-	-	-	-	-	-	-	-	-	-	-	-	-	-	-	-	-	-	-	-	-	-	-	-	-	-	-	-	-	-	-	-
AX-147249099	Aradu.A05	7391321	Sten2	-	-	-	-	-	-	-	-	-	-	-	-	-	-	-	-	-	-	-	-	-	-	-	-	-	-	-	-	-	-	-	-	-	-	-	-	-	-	-	-	-	-	-	-	-	-
AX-147221675	Aradu.A05	7804927	Sten1	-	-	-	-	-	-	-	-	-	-	-	-	-	-	-	-	-	-	-	-	-	-	-	-	-	-	-	-	-	-	-	-	-	-	-	-	-	-	-	-	-	-	-	-	-	-
AX-147221688	Aradu.A05	7958564	Sten2	-	-	-	-	-	-	-	-	-	-	-	-	-	-	-	-	-	-	-	-	-	-	-	-	-	-	-	-	-	-	-	-	-	-	-	-	-	-	-	-	-	-	-	-	-	-
AX-147221702	Aradu.A05	8422937	Sten1	-	-	-	-	-	-	-	-	-	-	-	-	-	-	-	-	-	-	-	-	-	-	-	-	-	-	-	-	-	-	-	-	-	-	-	-	-	-	-	-	-	-	-	-	-	-
AX-147221713	Aradu.A05	8621849	Sten2	-	-	-	-	-	-	-	-	-	-	-	-	-	-	-	-	-	-	-	-	-	-	-	-	-	-	-	-	-	-	-	-	-	-	-	-	-	-	-	-	-	-	-	-	-	-
AX-176791747	Aradu.A05	9401169	Sten1	-	-	-	-	-	-	-	-	-	-	-	-	-	-	-	-	-	-	-	-	-	-	-	-	-	-	-	-	-	-	-	-	-	-	-	-	-	-	-	-	-	-	-	-	-	-
AX-176811312	Aradu.A05	10913462	Sten1	-	-	-	-	-	-	-	-	-	-	-	-	-	-	-	-	-	-	-	-	-	-	-	-	-	-	-	-	-	-	-	-	-	-	-	-	-	-	-	-	-	-	-	-	-	-
AX-147221803	Aradu.A05	10961901	-	-	-	-	-	-	-	-	-	-	-	-	-	-	-	-	-	-	-	-	-	-	-	-	-	-	-	-	-	-	-	-	-	-	-	-	-	-	-	-	-	-	-	-	-	-	-
AX-176822296	Aradu.A05	11250415	Sten1	-	-	-	-	-	-	-	-	-	-	-	-	-	-	-	-	-	-	-	-	-	-	-	-	-	-	-	-	-	-	-	-	-	-	-	-	-	-	-	-	-	-	-	-	-	-
AX-147221836	Aradu.A05	11851959	-	-	-	-	-	-	-	-	-	-	-	-	-	-	-	-	-	-	-	-	-	-	-	-	-	-	-	-	-	-	-	-	-	-	-	-	-	-	-	-	-	-	-	-	-	-	-
AX-147221874	Aradu.A05	13259270	-	-	-	-	-	-	-	-	-	-	-	-	-	-	-	-	-	-	-	-	-	-	-	-	-	-	-	-	-	-	-	-	-	-	-	-	-	-	-	-	-	-	-	-	-	-	-
AX-147249307	Aradu.A05	13672610	-	-	-	-	-	-	-	-	-	-	-	-	-	-	-	-	-	-	-	-	-	-	-	-	-	-	-	-	-	-	-	-	-	-	-	-	-	-	-	-	-	-	-	-	-	-	-
AX-147221919	Aradu.A05	14263497	Sten2	-	-	-	-	-	-	-	-	-	-	-	-	-	-	-	-	-	-	-	-	-	-	-	-	-	-	-	-	-	-	-	-	-	-	-	-	-	-	-	-	-	-	-	-	-	-
AX-147221995	Aradu.A05	16078954	-	-	-	-	-	-	-	-	-	-	-	-	-	-	-	-	-	-	-	-	-	-	-	-	-	-	-	-	-	-	-	-	-	-	-	-	-	-	-	-	-	-	-	-	-	-	-
AX-147222046	Aradu.A05	17231044	Sten2	-	-	-	-	-	-	-	-	-	-	-	-	-	-	-	-	-	-	-	-	-	-	-	-	-	-	-	-	-	-	-	-	-	-	-	-	-	-	-	-	-	-	-	-	-	-
AX-147222047	Aradu.A05	17232224	Sten2	-	-	-	-	-	-	-	-	-	-	-	-	-	-	-	-	-	-	-	-	-	-	-	-	-	-	-	-	-	-	-	-	-	-	-	-	-	-	-	-	-	-	-	-	-	-
AX-147249465	Aradu.A05	17514990	Sten2	-	-	-	-	-	-	-	-	-	-	-	-	-	-	-	-	-	-	-	-	-	-	-	-	-	-	-	-	-	-	-	-	-	-	-	-	-	-	-	-	-	-	-	-	-	-
AX-147222100	Aradu.A05	18621181	-	-	-	-	-	-	-	-	-	-	-	-	-	-	-	-	-	-	-	-	-	-	-	-	-	-	-	-	-	-	-	-	-	-	-	-	-	-	-	-	-	-	-	-	-	-	-
AX-147222142	Aradu.A05	20099592	-	-	-	-	-	-	-	-	-	-	-	-	-	-	-	-	-	-	-	-	-	-	-	-	-	-	-	-	-	-	-	-	-	-	-	-	-	-	-	-	-	-	-	-	-	-	-
AX-147249566	Aradu.A05	20650119	Sten1	-	-	-	-	-	-	-	-	-	-	-	-	-	-	-	-	-	-	-	-	-	-	-	-	-	-	-	-	-	-	-	-	-	-	-	-	-	-	-	-	-	-	-	-	-	-
AX-176817394	Aradu.A05	21986891	-	-	-	-	-	-	-	-	-	-	-	-	-	-	-	-	-	-	-	-	-	-	-	-	-	-	-	-	-	-	-	-	-	-	-	-	-	-	-	-	-	-	-	-	-	-	-
AX-147222237	Aradu.A05	23757186	Sten2	-	-	-	-	-	-	-	-	-	-	-	-	-	-	-	-	-	-	-	-	-	-	-	-	-	-	-	-	-	-	-	-	-	-	-	-	-	-	-	-	-	-	-	-	-	-
AX-176804676	Aradu.A05	25031453	-	-	-	-	-	-	-	-	-	-	-	-	-	-	-	-	-	-	-	-	-	-	-	-	-	-	-	-	-	-	-	-	-	-	-	-	-	-	-	-	-	-	-	-	-	-	-
AX-176822683	Aradu.A05	25117467	-	-	-	-	-	-	-	-	-	-	-	-	-	-	-	-	-	-	-	-	-	-	-	-	-	-	-	-	-	-	-	-	-	-	-	-	-	-	-	-	-	-	-	-	-	-	-
AX-176811362	Aradu.A05	27359344	Sten1	-	-	-	-	-	-	-	-	-	-	-	-	-	-	-	-	-	-	-	-	-	-	-	-	-	-	-	-	-	-	-	-	-	-	-	-	-	-	-	-	-	-	-	-	-	-
AX-176793592	Aradu.A05	31727216	-	-	-	-	-	-	-	-	-	-	-	-	-	-	-	-	-	-	-	-	-	-	-	-	-	-	-	-	-	-	-	-	-	-	-	-	-	-	-	-	-	-	-	-	-	-	-
AX-147222358	Aradu.A05	32342436	-	-	-	-	-	-	-	-	-	-	-	-	-	-	-	-	-	-	-	-	-	-	-	-	-	-	-	-	-	-	-	-	-	-	-	-	-	-	-	-	-	-	-	-	-	-	-
AX-176796032	Aradu.A05	34031968	Sten1	-	-	-	-	-	-	-	-	-	-	-	-	-	-	-	-	-	-	-	-	-	-	-	-	-	-	-	-	-	-	-	-	-	-	-	-	-	-	-	-	-	-	-	-	-	-
AX-176799081	Aradu.A05	36717551	Sten1	-	-	-	-	-	-	-	-	-	-	-	-	-	-	-	-	-	-	-	-	-	-	-	-	-	-	-	-	-	-	-	-	-	-	-	-	-	-	-	-	-	-	-	-	-	-
AX-176792814	Aradu.A05	36976387	-	-	-	-	-	-	-	-	-	-	-	-	-	-	-	-	-	-	-	-	-	-	-	-	-	-	-	-	-	-	-	-	-	-	-	-	-	-	-	-	-	-	-	-	-	-	-
AX-176811307	Aradu.A05	36977191	Sten1	-	-	-	-	-	-	-	-	-	-	-	-	-	-	-	-	-	-	-	-	-	-	-	-	-	-	-	-	-	-	-	-	-	-	-	-	-	-	-	-	-	-	-	-	-	-
AX-176797940	Aradu.A05	40506247	Sten1	-	-	-	-	-	-	-	-	-	-	-	-	-	-	-	-	-	-	-	-	-	-	-	-	-	-	-	-	-	-	-	-	-	-	-	-	-	-	-	-	-	-	-	-	-	-
AX-176818373	Aradu.A05	42556912	-	-	-	-	-	-	-	-	-	-	-	-	-	-	-	-	-	-	-	-	-	-	-	-	-	-	-	-	-	-	-	-	-	-	-	-	-	-	-	-	-	-	-	-	-	-	-
AX-176797853	Aradu.A05	43000265	-	-	-	-	-	-	-	-	-	-	-	-	-	-	-	-	-	-	-	-	-	-	-	-	-	-	-	-	-	-	-	-	-	-	-	-	-	-	-	-	-	-	-	-	-	-	-
AX-176810849	Aradu.A05	43002251	-	-	-	-	-	-	-	-	-	-	-	-	-	-	-	-	-	-	-	-	-	-	-	-	-	-	-	-	-	-	-	-	-	-	-	-	-	-	-	-	-	-	-	-	-	-	-
AX-147222496	Aradu.A05	50529881	-	-	-	-	-	-	-	-	-	-	-	-	-	-	-	-	-	-	-	-	-	-	-	-	-	-	-	-	-	-	-	-	-	-	-	-	-	-	-	-	-	-	-	-	-	-	-
AX-147222497	Aradu.A05	50577511	-	-	-	-	-	-	-	-	-	-	-	-	-	-	-	-	-	-	-	-	-	-	-	-	-	-	-	-	-	-	-	-	-	-	-	-	-	-	-	-	-	-	-	-	-	-	-
AX-176800228	Aradu.A05	54227310	Sten2	-	-	-	-	-	-	-	-	-	-	-	-	-	-	-	-	-	-	-	-	-	-	-	-	-	-	-	-	-	-	-	-	-	-	-	-	-	-	-	-	-	-	-	-	-	-
AX-176805364	Aradu.A05	67889391	-	-	-	-	-	-	-	-	-	-	-	-	-	-	-	-	-	-	-	-	-	-	-	-	-	-	-	-	-	-	-	-	-	-	-	-	-	-	-	-	-	-	-	-	-	-	-
AX-176816000	Aradu.A05	68572608	-	-	-	-	-	-	-	-	-	-	-	-	-	-	-	-	-	-	-	-	-	-	-	-	-	-	-	-	-	-	-	-	-	-	-	-	-	-	-	-	-	-	-	-	-	-	-
AX-176795027	Aradu.A05	73887426	-	-	-	-	-	-	-	-	-	-	-	-	-	-	-	-	-	-	-	-	-	-	-	-	-	-	-	-	-	-	-	-	-	-	-	-	-	-	-	-	-	-	-	-	-	-	-
AX-176822930	Aradu.A05	84661588	-	-	-	-	-	-	-	-	-	-	-	-	-	-	-	-	-	-	-	-	-	-	-	-	-	-	-	-	-	-	-	-	-	-	-	-	-	-	-	-	-	-	-	-	-	-	-
AX-176798238	Aradu.A05	86020672	-	-	-	-	-	-	-	-	-	-	-	-	-	-	-	-	-	-	-	-	-	-	-	-	-	-	-	-	-	-	-	-	-	-	-	-	-	-	-	-	-	-	-	-	-	-	-
AX-176803441	Aradu.A05	86591426	-	-	-	-	-	-	-	-	-	-	-	-	-	-	-	-	-	-	-	-	-	-	-	-	-	-	-	-	-	-	-	-	-	-	-	-	-	-	-	-	-	-	-	-	-	-	-
AX-147222936	Aradu.A05	86654618	-	-	-	-	-	-	-	-	-	-	-	-	-	-	-	-	-	-	-	-	-	-	-	-	-	-	-	-	-	-	-	-	-	-	-	-	-	-	-	-	-	-	-	-	-	-	-
AX-147222944	Aradu.A05	86735502	Sten2	-	-	-	-	-	-	-	-	-	-	-	-	-	-	-	-	-	-	-	-	-	-	-	-	-	-	-	-	-	-	-	-	-	-	-	-	-	-	-	-	-	-	-	-	-	-
AX-177639819	Aradu.A05	87492314	Sten1	-	-	-	-	-	-	-	-	-	-	-	-	-	-	-	-	-	-	-	-	-	-	-	-	-	-	-	-	-	-	-	-	-	-	-	-	-	-	-	-	-	-	-	-	-	-
AX-147223051	Aradu.A05	88657518	-	-	-	-	-	-	-	-	-	-	-	-	-	-	-	-	-	-	-	-	-	-	-	-	-	-	-	-	-	-	-	-	-	-	-	-	-	-	-	-	-	-	-	-	-	-	-
AX-147223052	Aradu.A05	88665268	Sten1	-	-	-	-	-	-	-	-	-	-	-	-	-	-	-	-	-	-	-	-	-	-	-	-	-	-	-	-	-	-	-	-	-	-	-	-	-	-	-	-	-	-	-	-	-	-
AX-176811668	Aradu.A05	91845257	-	-	-	-	-	-	-	-	-	-	-	-	-	-	-	-	-	-	-	-	-	-	-	-	-	-	-	-	-	-	-	-	-	-	-	-	-	-	-	-	-	-	-	-	-	-	-
AX-147223242	Aradu.A05	92835506	Sten1	-	-	-	-	-	-	-	-	-	-	-	-	-	-	-	-	-	-	-	-	-	-	-	-	-	-	-	-	-	-	-	-	-	-	-	-	-	-	-	-	-	-	-	-	-	-
AX-147223282	Aradu.A05	93958482	Sten1	-	-	-	-	-	-	-	-	-	-	-	Sten1	-	Sten1	-	-	-	-	-	-	-	-	-	-	-	-	-	-	-	-	-	-	-	-	-	-	-	-	-	Sten1	-	Sten1	-	Sten1	-	-
AX-147223371	Aradu.A05	96432005	-	-	-	-	-	-	-	-	-	-	-	-	-	-	-	-	-	-	-	-	-	-	-	-	-	-	-	-	-	-	-	-	-	-	-	-	-	-	-	-	-	-	-	-	-	-	-
AX-176814728	Aradu.A05	97045943	-	-	-	-	-	-	-	-	-	-	-	-	-	-	-	-	-	-	-	-	-	-	-	-	-	-	-	-	-	-	-	-	-	-	-	-	-	-	-	-	-	-	-	-	-	-	-
AX-176822926	Aradu.A05	100844336	-	-	-	-	-	-	-	-	-	-	-	-	-	-	-	-	-	-	-	-	-	-	-	-	-	-	-	-	-	-	-	-	-	-	-	-	-	-	-	-	-	-	-	-	-	-	-
AX-147250292	Aradu.A05	100941646	-	Sten2	Sten1	Sten2	Sten2	Sten2	Sten2	Sten2	Sten2	Sten2	Sten2	Sten2	Sten1	Sten2	Sten1	Sten2	Sten2	Sten2	Sten2	Sten2	Sten2	Sten2	Sten2	Sten2	Sten2	Sten2	Sten2	Sten2	Sten2	Sten2	Sten2	Sten2	Sten2	Sten2	Sten2	Sten2	Sten2	Sten2	Sten2	Sten2	Sten1	Sten2	Sten1	Sten2	Sten1	Sten2	Sten2
AX-147223533	Aradu.A05	101084410	Sten1	-	-	-	-	-	-	-	-	-	-	-	-	-	-	-	-	-	-	-	-	-	-	-	-	-	-	-	-	-	-	-	-	-	-	-	-	-	-	-	-	-	-	-	-	-	-
AX-147223581	Aradu.A05	102045942	Sten2	-	-	-	-	-	-	-	-	-	-	-	-	-	-	-	-	-	-	-	-	-	-	-	-	-	-	-	-	-	-	-	-	-	-	-	-	-	-	-	-	-	-	-	-	-	-
AX-147223646	Aradu.A05	102825889	-	-	-	-	-	-	-	-	-	-	-	-	-	-	-	-	-	-	-	-	-	-	-	-	-	-	-	-	-	-	-	-	-	-	-	-	-	-	-	-	-	-	-	-	-	-	-
AX-147223670	Aradu.A05	103357781	Sten1	-	-	-	-	-	-	-	-	-	-	-	-	-	-	-	-	-	-	-	-	-	-	-	-	-	-	-	-	-	-	-	-	-	-	-	-	-	-	-	-	-	-	-	-	-	-
AX-147223696	Aradu.A05	104206477	Sten2	-	-	-	-	-	-	-	-	-	-	-	-	-	-	-	-	-	-	-	-	-	-	-	-	-	-	-	-	-	-	-	-	-	-	-	-	-	-	-	-	-	-	-	-	-	-
AX-147223711	Aradu.A05	104421908	Sten1	-	-	-	-	-	-	-	-	-	-	-	-	-	-	-	-	-	-	-	-	-	-	-	-	-	-	-	-	-	-	-	-	-	-	-	-	-	-	-	-	-	-	-	-	-	-
AX-177643829	Aradu.A05	104743468	-	-	-	-	-	-	-	-	-	-	-	-	-	-	-	-	-	-	-	-	-	-	-	-	-	-	-	-	-	-	-	-	-	-	-	-	-	-	-	-	-	-	-	-	-	-	-
AX-147223961	Aradu.A05	108571171	Sten1	-	-	-	-	-	-	-	-	-	-	-	-	-	-	-	-	-	-	-	-	-	-	-	-	-	-	-	-	-	-	-	-	-	-	-	-	-	-	-	-	-	-	-	-	-	-
AX-147251419	Aradu.A05	108709502	Sten1	-	-	-	-	-	-	-	-	-	-	-	-	-	-	-	-	-	-	-	-	-	-	-	-	-	-	-	-	-	-	-	-	-	-	-	-	-	-	-	-	-	-	-	-	-	-
AX-176795839	Aradu.A05	109698643	-	-	-	-	-	-	-	-	-	-	-	-	-	-	-	-	-	-	-	-	-	-	-	-	-	-	-	-	-	-	-	-	-	-	-	-	-	-	-	-	-	-	-	-	-	-	-
AX-147224089	Aradu.A06	259934	Sten1	-	-	-	-	-	-	-	-	-	-	-	-	-	-	-	-	-	-	-	-	-	-	-	-	-	-	-	-	-	-	-	-	-	-	-	-	-	-	-	-	-	-	-	-	-	-
AX-176799190	Aradu.A06	267745	Sten1	-	-	-	-	-	-	-	-	-	-	-	-	-	-	-	-	-	-	-	-	-	-	-	-	-	-	-	-	-	-	-	-	-	-	-	-	-	-	-	-	-	-	-	-	-	-
AX-147224108	Aradu.A06	517702	Sten1	-	-	-	-	-	-	-	-	-	-	-	-	-	-	-	-	-	-	-	-	-	-	-	-	-	-	-	-	-	-	-	-	-	-	-	-	-	-	-	-	-	-	-	-	-	-
AX-147224160	Aradu.A06	1049890	Sten1	-	-	-	-	-	-	-	-	-	-	-	-	-	-	-	-	-	-	-	-	-	-	-	-	-	-	-	-	-	-	-	-	-	-	-	-	-	-	-	-	-	-	-	-	-	-
AX-147224165	Aradu.A06	1222129	Sten2	-	-	-	-	-	-	-	-	-	-	-	-	-	-	-	-	-	-	-	-	-	-	-	-	-	-	-	-	-	-	-	-	-	-	-	-	-	-	-	-	-	-	-	-	-	-
AX-147224218	Aradu.A06	1685871	Sten1	-	-	-	-	-	-	-	-	-	-	-	-	-	-	-	-	-	-	-	-	-	-	-	-	-	-	-	-	-	-	-	-	-	-	-	-	-	-	-	-	-	-	-	-	-	-
AX-176823479	Aradu.A06	1978202	Sten1	-	-	-	-	-	-	-	-	-	-	-	-	-	-	-	-	-	-	-	-	-	-	-	-	-	-	-	-	-	-	-	-	-	-	-	-	-	-	-	-	-	-	-	-	-	-
AX-147224237	Aradu.A06	2034371	Sten1	-	-	-	-	-	-	-	-	-	-	-	-	-	-	-	-	-	-	-	-	-	-	-	-	-	-	-	-	-	-	-	-	-	-	-	-	-	-	-	-	-	-	-	-	-	-
AX-147224248	Aradu.A06	2371320	Sten1	-	-	-	-	-	-	-	-	-	-	-	-	-	-	-	-	-	-	-	-	-	-	-	-	-	-	-	-	-	-	-	-	-	-	-	-	-	-	-	-	-	-	-	-	-	-
AX-147224251	Aradu.A06	2375139	Sten1	-	-	-	-	-	-	-	-	-	-	-	-	-	-	-	-	-	-	-	-	-	-	-	-	-	-	-	-	-	-	-	-	-	-	-	-	-	-	-	-	-	-	-	-	-	-
AX-147224270	Aradu.A06	2747003	Sten2	-	-	Sten2	-	Sten2	-	Sten1	-	-	-	Sten2	-	Sten2	-	Sten2	-	-	-	-	-	-	-	-	-	-	-	-	-	-	-	-	-	-	-	-	-	-	-	Sten1	-	Sten1	-	Sten1	-	Sten2	-
AX-147224280	Aradu.A06	2863952	Sten2	-	-	Sten2	-	Sten2	-	Sten1	-	-	-	Sten2	-	Sten2	-	Sten2	-	-	-	-	-	-	-	-	-	-	-	-	-	-	-	-	-	-	-	-	-	-	-	Sten1	-	Sten1	-	Sten1	-	Sten2	-
AX-176816233	Aradu.A06	2915219	Sten2	-	-	Sten2	-	Sten2	-	Sten1	-	-	-	Sten2	-	Sten2	-	Sten2	-	-	-	-	-	-	-	-	-	-	-	-	-	-	-	-	-	-	-	-	-	-	-	Sten1	-	-	-	Sten1	-	Sten2	-
AX-147224316	Aradu.A06	3474367	Sten2	-	-	Sten2	-	Sten2	-	Sten1	-	-	-	Sten2	-	Sten1	-	Sten1	-	-	-	-	-	-	-	-	-	-	-	-	-	-	-	-	-	-	-	-	-	-	-	Sten1	-	Sten1	-	Sten1	-	Sten2	-
AX-147224370	Aradu.A06	4261015	Sten2	-	-	Sten2	-	Sten2	-	Sten1	-	-	-	Sten2	-	Sten1	-	Sten1	-	-	-	-	-	-	-	-	-	-	-	-	-	-	-	-	-	-	-	-	-	-	-	Sten1	-	Sten1	-	Sten1	-	Sten2	-
AX-147224372	Aradu.A06	4280783	Sten2	-	-	-	-	Sten2	-	Sten1	-	-	-	Sten2	-	Sten1	-	Sten1	-	-	-	-	-	-	-	-	-	-	-	-	-	-	-	-	-	-	-	-	-	-	-	Sten1	-	Sten1	-	Sten1	-	Sten2	-
AX-147224420	Aradu.A06	4687980	Sten1	-	-	-	-	-	-	-	-	-	-	-	-	-	-	-	-	-	-	-	-	-	-	-	-	-	-	-	-	-	-	-	-	-	-	-	-	-	-	-	-	-	-	-	-	-	-
AX-147224485	Aradu.A06	5405523	Sten2	-	-	Sten1	-	Sten2	-	Sten1	-	-	-	Sten2	-	Sten1	-	Sten1	-	-	-	-	-	-	-	-	-	-	-	-	-	-	-	-	-	-	-	-	-	-	-	Sten1	-	Sten1	-	Sten1	-	Sten2	-
AX-147224487	Aradu.A06	5411401	Sten2	-	-	Sten1	-	Sten2	-	Sten1	-	-	-	Sten2	-	Sten1	-	Sten1	-	-	-	-	-	-	-	-	-	-	-	-	-	-	-	-	-	-	-	-	-	-	-	Sten1	-	Sten1	-	Sten1	-	Sten2	-
AX-147224507	Aradu.A06	5789236	Sten2	-	-	-	-	Sten2	-	Sten1	-	-	-	Sten2	-	Sten1	-	Sten1	-	-	-	-	-	-	-	-	-	-	-	-	-	-	-	-	-	-	-	-	-	-	-	Sten1	-	Sten1	-	Sten1	-	Sten2	-
AX-147224542	Aradu.A06	6374094	Sten2	-	-	-	-	Sten2	-	Sten1	-	-	-	Sten2	-	Sten1	-	Sten1	-	-	-	-	-	-	-	-	-	-	-	-	-	-	-	-	-	-	-	-	-	-	-	Sten1	-	Sten1	-	Sten1	-	Sten2	-
AX-147224620	Aradu.A06	7334057	Sten2	-	-	-	-	Sten2	-	Sten1	-	-	-	-	-	Sten1	-	Sten1	-	-	-	-	-	-	-	-	-	-	-	-	-	-	-	-	-	-	-	-	-	-	-	Sten1	-	Sten1	-	Sten1	-	Sten2	-
AX-147224636	Aradu.A06	7672324	Sten2	-	-	-	-	Sten2	-	Sten1	-	-	-	Sten2	-	Sten1	-	Sten1	-	-	-	-	-	-	-	-	-	-	-	-	-	-	-	-	-	-	-	-	-	-	-	Sten1	-	Sten1	-	Sten1	-	Sten2	-
AX-147224664	Aradu.A06	8149649	Sten2	-	-	-	-	Sten2	-	Sten1	-	-	-	Sten2	-	Sten1	-	Sten1	-	-	-	-	-	-	-	-	-	-	-	-	-	-	-	-	-	-	-	-	-	-	-	Sten1	-	Sten1	-	Sten1	-	Sten2	-
AX-147224737	Aradu.A06	9574526	Sten2	-	-	-	-	Sten2	-	Sten1	-	-	-	Sten1	-	Sten1	-	Sten1	-	-	-	-	-	-	-	-	-	-	-	-	-	-	-	-	-	Sten1	-	-	-	-	-	Sten1	-	Sten1	-	Sten1	-	Sten2	-
AX-147224808	Aradu.A06	10688288	Sten2	-	-	-	-	Sten2	-	Sten1	-	-	-	Sten1	-	Sten1	-	Sten1	-	-	-	-	-	-	-	-	-	-	-	Sten1	-	-	-	-	-	Sten1	-	-	-	-	-	Sten1	-	Sten1	-	Sten1	-	Sten2	-
AX-147224896	Aradu.A06	11846893	Sten2	-	-	-	-	-	-	-	-	-	-	-	-	-	-	-	-	-	-	-	-	-	Sten1	-	-	-	-	-	-	-	-	-	-	-	Sten1	-	-	-	-	-	-	-	-	-	-	-	Sten1
AX-147224945	Aradu.A06	12964569	Sten2	-	-	-	-	Sten2	-	-	-	Sten1	-	Sten1	-	Sten1	-	Sten1	-	-	-	-	-	-	-	-	-	-	-	Sten1	-	-	-	-	-	Sten1	-	-	-	-	-	Sten1	-	Sten1	-	Sten1	-	Sten2	-
AX-176801863	Aradu.A06	14539952	Sten2	-	-	-	-	Sten2	-	Sten1	-	Sten1	-	Sten1	-	Sten1	-	Sten1	-	-	-	-	-	-	-	-	-	-	-	Sten1	-	-	-	-	-	Sten1	-	-	-	-	-	Sten1	-	Sten1	-	Sten1	-	Sten2	-
AX-147225078	Aradu.A06	15715130	Sten2	-	-	-	-	Sten2	-	Sten1	-	Sten1	-	Sten1	-	Sten1	-	Sten1	-	-	-	-	-	-	-	-	-	-	-	Sten1	-	-	-	-	-	Sten1	-	-	-	-	-	Sten1	-	Sten1	-	Sten1	-	Sten2	-
AX-176819641	Aradu.A06	16065445	Sten2	-	-	-	-	Sten2	-	-	-	Sten1	-	Sten1	-	Sten1	-	-	-	-	-	-	-	-	-	-	-	-	-	-	-	-	-	-	-	-	-	-	-	-	-	Sten1	-	Sten1	-	-	-	Sten2	-
AX-147225104	Aradu.A06	16428344	Sten2	-	-	-	-	Sten2	-	Sten1	-	Sten1	-	Sten1	-	Sten1	-	Sten1	-	-	-	-	-	-	-	-	-	-	-	Sten1	-	-	-	-	-	Sten1	-	-	-	-	-	Sten1	-	Sten1	-	Sten1	-	Sten2	-
AX-147225232	Aradu.A06	20970182	Sten2	-	-	-	-	Sten2	-	Sten1	-	Sten1	-	Sten1	-	Sten1	-	Sten1	-	-	-	-	-	-	-	-	-	-	-	Sten1	-	-	-	-	-	Sten1	-	-	-	-	-	Sten1	-	Sten1	-	Sten1	-	Sten2	-
AX-176820316	Aradu.A06	24872134	-	-	-	-	-	-	-	-	-	-	-	-	-	-	-	-	-	-	-	-	-	-	-	-	-	-	-	-	-	-	-	-	-	-	-	-	-	-	-	-	-	-	-	-	-	-	-
AX-147225325	Aradu.A06	32572657	Sten2	-	-	-	-	Sten2	-	Sten1	-	Sten1	-	Sten1	-	Sten1	-	Sten1	-	-	-	-	-	-	-	-	-	-	-	Sten1	-	-	-	-	-	Sten1	-	-	-	-	-	Sten1	-	Sten1	-	Sten1	-	Sten2	-
AX-176792088	Aradu.A06	34785196	-	-	-	-	-	-	-	-	-	-	-	-	-	-	-	-	-	-	-	-	-	-	-	-	-	-	-	-	-	-	-	-	-	-	-	-	-	-	-	-	-	-	-	-	-	-	-
AX-147225334	Aradu.A06	34826404	Sten2	-	-	-	-	Sten2	-	Sten1	-	Sten1	-	Sten1	-	Sten1	-	Sten1	-	-	-	-	-	-	-	-	-	-	-	Sten1	-	-	-	-	-	Sten1	-	-	-	-	-	Sten1	-	Sten1	-	Sten1	-	Sten2	-
AX-177638959	Aradu.A06	41229012	Sten2	-	-	-	-	-	-	-	-	-	-	-	-	-	-	-	-	-	-	-	-	-	-	-	-	-	-	-	-	-	-	-	-	-	-	-	-	-	-	-	-	-	-	-	-	-	-
AX-176808798	Aradu.A06	51690304	-	-	-	-	-	Sten2	-	-	-	-	-	-	-	-	-	-	-	-	-	-	-	-	-	-	-	-	-	-	-	-	-	-	-	-	-	-	-	-	-	-	-	Sten1	-	-	-	-	-
AX-147225368	Aradu.A06	52572560	Sten2	-	-	-	-	Sten2	-	Sten1	-	Sten1	-	Sten1	-	Sten1	-	Sten1	-	-	-	-	-	-	-	-	-	-	-	Sten1	-	-	-	-	-	Sten1	-	-	-	-	-	Sten1	-	Sten1	-	Sten1	-	Sten2	-
AX-147225443	Aradu.A06	66423228	Sten2	-	-	-	-	Sten2	-	Sten1	-	Sten1	-	Sten1	-	Sten1	-	Sten1	-	-	-	-	-	-	-	-	-	-	-	Sten1	-	-	-	-	-	Sten1	-	-	-	-	-	Sten1	-	Sten1	-	Sten1	-	Sten2	-
AX-176795818	Aradu.A06	69243064	Sten1	-	-	-	-	Sten1	-	Sten1	-	Sten1	-	-	-	Sten1	-	Sten1	-	-	-	-	-	-	-	-	-	-	-	Sten1	-	-	-	-	-	-	-	-	-	-	-	-	-	-	-	Sten1	-	Sten1	-
AX-176796576	Aradu.A06	69243068	-	-	-	-	-	-	-	-	-	-	-	-	-	-	-	-	-	-	-	-	-	-	-	-	-	-	-	-	-	-	-	-	-	-	-	-	-	-	-	-	-	-	-	-	-	-	-
AX-147225464	Aradu.A06	69465627	Sten2	-	-	-	-	Sten2	-	Sten1	-	Sten1	-	Sten1	-	Sten1	-	Sten1	-	-	-	-	-	-	-	-	-	-	-	Sten1	-	-	-	-	-	-	-	-	-	-	-	Sten1	-	Sten1	-	Sten1	-	Sten2	-
AX-147225589	Aradu.A06	79848717	Sten1	-	-	-	-	-	-	-	-	-	-	-	-	-	-	-	-	-	-	-	-	-	-	-	-	-	-	-	-	-	-	-	-	-	-	-	-	-	-	-	-	-	-	-	-	-	-
AX-147225594	Aradu.A06	79851479	Sten2	-	-	-	-	Sten2	-	Sten1	-	Sten1	-	Sten1	-	Sten1	-	Sten1	-	-	-	-	-	-	-	-	-	-	-	Sten1	-	-	-	-	-	Sten1	-	-	-	-	-	Sten1	-	Sten1	-	Sten1	-	Sten2	-
AX-176817648	Aradu.A06	79933722	Sten2	-	-	-	-	Sten2	-	-	-	Sten1	-	Sten1	-	Sten1	-	Sten1	-	-	-	-	-	-	-	-	-	-	-	-	-	-	-	-	-	Sten1	-	-	-	-	-	Sten1	-	Sten1	-	Sten1	-	Sten2	-
AX-147225614	Aradu.A06	80755197	Sten2	-	-	-	-	Sten2	-	Sten1	-	Sten1	-	Sten1	-	Sten1	-	Sten1	-	-	-	-	-	-	-	-	-	-	-	Sten1	-	-	-	-	-	Sten1	-	-	-	-	-	Sten1	-	Sten1	-	Sten1	-	Sten2	-
AX-147225650	Aradu.A06	82779126	Sten2	-	-	-	-	Sten2	-	Sten1	-	Sten1	-	Sten1	-	Sten1	-	Sten1	-	-	-	-	-	-	-	-	-	-	-	Sten1	-	-	-	-	-	Sten1	-	-	-	-	-	Sten1	-	Sten1	-	Sten1	-	Sten2	-
AX-147225651	Aradu.A06	82779734	Sten2	-	-	-	-	Sten2	-	Sten1	-	Sten1	-	Sten1	-	Sten1	-	Sten1	-	-	-	-	-	-	-	-	-	-	-	Sten1	-	-	-	-	-	Sten1	-	-	-	-	-	Sten1	-	Sten1	-	Sten1	-	Sten2	-
AX-147225660	Aradu.A06	83182983	Sten2	-	-	-	-	Sten2	-	Sten1	-	Sten1	-	Sten1	-	Sten1	-	Sten1	-	-	-	-	-	-	-	-	-	-	-	Sten1	-	-	-	-	-	Sten1	-	-	-	-	-	Sten1	-	Sten1	-	Sten1	-	Sten2	-
AX-177642422	Aradu.A06	84013115	-	-	-	-	-	-	-	-	-	-	-	-	-	-	-	-	-	Sten1	-	-	-	-	Sten1	-	-	-	-	-	-	-	-	-	-	-	-	Sten1	-	-	-	-	-	-	-	-	-	-	-
AX-176811797	Aradu.A06	85149263	-	-	-	-	-	-	-	-	-	-	-	-	-	-	-	-	-	-	-	-	-	-	-	-	-	-	-	-	-	-	-	-	-	-	-	-	-	-	-	-	-	-	-	-	-	-	-
AX-147225729	Aradu.A06	86792360	-	-	-	-	-	-	-	-	-	-	-	-	-	-	-	-	-	-	-	-	-	-	-	-	-	-	-	-	-	-	-	-	-	-	-	-	-	-	-	-	-	-	-	-	-	-	-
AX-147225805	Aradu.A06	91658393	-	-	-	-	-	-	-	-	-	-	-	-	-	-	-	-	-	-	-	-	-	-	-	-	-	-	-	-	-	-	-	-	-	Sten1	-	-	-	-	-	-	-	-	-	-	-	-	-
AX-176798419	Aradu.A06	92280811	Sten1	-	-	-	-	-	-	-	-	-	-	-	-	-	-	-	-	-	-	-	-	-	Sten1	-	-	-	-	-	-	-	-	-	-	-	-	-	-	-	-	-	-	-	-	-	-	-	-
AX-176798717	Aradu.A06	93862557	-	-	-	-	-	-	-	-	-	-	-	-	-	-	-	-	-	-	-	-	-	-	Sten1	-	-	-	-	-	-	-	-	-	-	-	-	-	-	-	-	-	-	-	-	-	-	-	-
AX-176796367	Aradu.A06	94129577	Sten2	-	-	-	-	-	-	-	-	-	-	-	-	-	-	-	-	-	-	-	-	-	-	-	-	-	-	Sten1	-	-	-	-	-	Sten1	-	-	-	-	-	-	-	-	-	-	-	-	-
AX-176808608	Aradu.A06	97062653	Sten2	-	-	-	-	-	-	-	-	-	-	-	-	-	-	-	-	-	-	-	-	-	-	-	-	-	-	Sten1	-	-	-	-	-	Sten1	-	-	-	-	-	-	-	-	-	-	-	-	-
AX-147225934	Aradu.A06	97902979	Sten2	-	-	-	-	-	-	-	-	-	-	-	-	-	-	-	-	-	-	-	-	-	-	-	-	-	-	Sten1	-	-	-	-	-	Sten1	-	-	-	-	-	-	-	-	-	-	-	-	-
AX-147225935	Aradu.A06	97904366	Sten2	-	-	-	-	-	-	-	-	-	-	-	-	-	-	-	-	-	-	-	-	-	-	-	-	-	-	Sten1	-	-	-	-	-	Sten1	-	-	-	-	-	-	-	-	-	-	-	-	-
AX-147225977	Aradu.A06	98751250	Sten1	-	-	-	-	-	-	-	-	-	-	-	-	-	-	-	-	-	-	-	-	-	-	-	-	-	-	-	-	-	-	-	-	Sten1	-	-	-	-	-	-	-	-	-	-	-	-	-
AX-147225997	Aradu.A06	99250062	Sten2	-	-	-	-	-	-	-	-	-	-	-	-	-	-	-	-	-	-	-	-	-	-	-	-	-	-	-	-	-	-	-	-	Sten1	-	-	-	-	-	-	-	-	-	-	-	-	-
AX-147226002	Aradu.A06	99493705	Sten2	-	-	-	-	-	-	-	-	-	-	-	-	-	-	-	-	-	-	-	-	-	-	-	-	-	-	Sten1	-	-	-	-	-	Sten1	-	-	-	-	-	-	-	-	-	-	-	-	-
AX-176802106	Aradu.A06	99772542	Sten2	-	-	-	-	-	-	-	-	-	-	-	-	-	-	-	-	-	-	-	-	-	-	-	-	-	-	Sten1	-	-	-	-	-	Sten1	-	-	-	-	-	-	-	-	-	-	-	-	-
AX-147226037	Aradu.A06	100317242	Sten2	-	-	-	-	-	-	-	-	-	-	-	-	-	-	-	-	-	-	-	-	-	-	-	-	-	-	Sten1	-	-	-	-	-	Sten1	-	-	-	-	-	-	-	-	-	-	-	-	-
AX-147226076	Aradu.A06	101146798	Sten2	-	-	-	-	-	-	-	-	-	-	-	-	-	-	-	-	-	-	-	-	-	-	-	-	-	-	Sten1	-	-	-	-	-	Sten1	-	-	-	-	-	-	-	-	-	-	-	-	-
AX-147226086	Aradu.A06	101300979	Sten2	-	-	-	-	-	-	-	-	-	-	-	-	-	-	-	-	-	-	-	-	-	-	-	-	-	-	Sten1	-	-	-	-	-	Sten1	-	-	-	-	-	-	-	-	-	-	-	-	-
AX-147226154	Aradu.A06	102679941	Sten2	-	-	-	-	-	-	-	-	-	-	-	-	-	-	-	-	-	-	-	-	-	-	-	-	-	-	-	-	-	-	-	-	-	-	-	-	-	-	-	-	-	-	-	-	-	-
AX-147226157	Aradu.A06	102694392	-	-	-	-	-	-	-	-	-	-	-	-	-	-	-	-	-	-	-	-	-	-	-	-	-	-	-	-	-	-	-	-	-	-	-	-	-	-	-	-	-	-	-	-	-	-	-
AX-147226178	Aradu.A06	103181434	Sten1	-	-	-	-	-	-	-	-	-	-	-	-	-	-	-	-	-	-	-	-	-	-	-	-	-	-	-	-	-	-	-	-	-	-	-	-	-	-	-	-	-	-	-	-	-	-
AX-147226189	Aradu.A06	103342388	Sten2	-	-	-	-	-	-	-	-	-	-	-	-	-	-	-	-	-	-	-	-	-	-	-	-	-	-	-	-	-	-	-	-	-	-	-	-	-	-	-	-	-	-	-	-	-	-
AX-176821210	Aradu.A06	104836791	-	-	-	-	-	-	-	-	-	-	-	-	-	-	-	-	-	-	-	-	-	-	Sten1	-	-	-	-	-	-	-	-	-	-	-	-	-	-	-	-	-	-	-	-	-	-	-	-
AX-147253814	Aradu.A06	105027171	Sten1	-	-	-	-	-	-	-	-	-	-	-	-	-	-	-	-	-	-	-	-	-	-	-	-	-	-	-	-	-	-	-	-	-	-	-	-	-	-	-	-	-	-	-	-	-	-
AX-147226288	Aradu.A06	105029082	Sten2	-	-	-	-	-	-	-	-	-	-	-	-	-	-	-	-	-	-	-	-	-	-	-	-	-	-	-	-	-	-	-	-	-	-	-	-	-	-	-	-	-	-	-	-	-	-
AX-147226305	Aradu.A06	105157006	Sten1	-	-	-	-	-	-	-	-	-	-	-	-	-	-	-	-	-	-	-	-	-	-	-	-	-	-	-	-	-	-	-	-	-	-	-	-	-	-	-	-	-	-	-	-	-	-
AX-147226332	Aradu.A06	105470812	Sten2	-	-	-	-	-	-	-	-	-	-	-	-	-	-	-	-	-	-	-	-	-	-	-	-	-	-	-	-	-	-	-	-	-	-	-	-	-	-	-	-	-	-	-	-	-	-
AX-176817780	Aradu.A06	106951673	Sten1	-	-	-	-	-	-	-	-	-	-	-	-	-	-	-	-	-	-	-	-	-	-	-	-	-	-	-	-	-	-	-	-	-	-	-	-	-	-	-	-	-	-	-	-	-	-
AX-147253944	Aradu.A06	107413089	Sten2	-	-	-	-	-	-	-	-	-	-	-	-	-	-	-	-	-	-	-	-	-	-	-	-	-	-	-	-	-	-	-	-	-	-	-	-	-	-	-	-	-	-	-	-	-	-
AX-147226446	Aradu.A06	107413443	Sten1	-	-	-	-	-	-	-	-	-	-	-	-	-	-	-	-	-	-	-	-	-	-	-	-	-	-	-	-	-	-	-	-	-	-	-	-	-	-	-	-	-	-	-	-	-	-
AX-176799154	Aradu.A06	108736195	Sten1	-	-	-	-	-	-	-	-	-	-	-	-	-	-	-	-	-	-	-	-	-	-	-	Sten1	-	-	-	-	-	-	-	-	-	-	-	-	-	-	-	-	-	-	-	-	-	-
AX-176800832	Aradu.A06	109385384	Sten2	-	-	-	-	-	-	-	Sten1	-	Sten1	-	Sten1	-	Sten1	-	-	-	-	-	-	-	-	-	-	-	-	-	-	-	-	-	-	-	-	-	-	-	Sten1	-	-	-	Sten1	-	-	-	-
AX-147226687	Aradu.A06	110550534	Sten2	-	-	-	-	-	-	-	-	-	-	-	-	-	-	-	-	-	-	-	-	-	-	-	-	-	-	-	-	-	-	-	-	-	-	-	-	-	-	-	-	-	-	-	-	-	-
AX-147226692	Aradu.A06	110634476	Sten2	-	-	-	-	-	-	-	-	-	-	-	-	-	-	-	-	-	-	-	-	-	-	-	-	-	-	-	-	-	-	-	-	-	-	-	-	-	-	-	-	-	-	-	-	-	-
AX-147254213	Aradu.A06	110636015	Sten2	-	-	-	-	-	-	-	-	-	-	-	-	-	-	-	-	-	-	-	-	-	-	-	-	-	-	-	-	-	-	-	-	-	-	-	-	-	-	-	-	-	-	-	-	-	-
AX-176811381	Aradu.A06	110707714	Sten2	-	-	-	-	-	-	-	-	-	-	-	-	-	-	-	-	-	-	-	-	-	-	-	-	-	-	-	-	-	-	-	-	-	-	-	-	-	-	-	-	-	-	-	-	-	-
AX-147254224	Aradu.A06	110755932	Sten1	-	-	-	-	-	-	-	-	-	-	-	-	-	-	-	-	-	-	-	-	-	-	-	-	-	-	-	-	-	-	-	-	-	-	-	-	-	-	-	-	-	-	-	-	-	-
AX-147254235	Aradu.A06	110815427	Sten2	-	-	-	-	-	-	-	-	-	-	-	-	-	-	-	-	-	-	-	-	-	-	-	-	-	-	-	-	-	-	-	-	-	-	-	-	-	-	-	-	-	-	-	-	-	-
AX-147226719	Aradu.A06	110816722	Sten2	-	-	-	-	-	-	-	-	-	-	-	-	-	-	-	-	-	-	-	-	-	-	-	-	-	-	-	-	-	-	-	-	-	-	-	-	-	-	-	-	-	-	-	-	-	-
AX-147226720	Aradu.A06	110820404	Sten1	-	-	-	-	-	-	-	-	-	-	-	-	-	-	-	-	-	-	-	-	-	-	-	-	-	-	-	-	-	-	-	-	-	-	-	-	-	-	-	-	-	-	-	-	-	-
AX-147226730	Aradu.A06	110905105	Sten2	-	-	-	-	-	-	-	-	-	-	-	-	-	-	-	-	-	-	-	-	-	-	-	-	-	-	-	-	-	-	-	-	-	-	-	-	-	-	-	-	-	-	-	-	-	-
AX-176805754	Aradu.A06	110975358	Sten2	-	-	-	-	-	-	-	-	-	-	-	-	-	-	-	-	-	-	-	-	-	-	-	-	-	-	-	-	-	-	-	-	-	-	-	-	-	-	-	-	-	-	-	-	-	-
AX-147226816	Aradu.A06	112388824	-	-	-	-	-	-	-	-	-	-	-	-	-	-	-	-	-	-	Sten1	-	-	-	Sten2	-	Sten1	-	Sten1	-	-	-	Sten1	-	Sten2	-	-	-	Sten1	-	-	-	-	-	-	-	-	-	-
AX-147226820	Aradu.A06	112447942	Sten2	-	-	-	-	-	-	-	-	-	-	-	-	-	-	-	-	-	Sten1	-	-	-	Sten2	-	Sten1	-	Sten1	-	-	-	Sten1	-	Sten2	-	-	-	Sten2	-	-	-	-	-	-	-	-	-	-
AX-147226911	Aradu.A07	1125060	Sten1	-	-	-	-	-	-	-	-	-	-	-	-	-	-	-	-	-	-	Sten1	-	-	-	-	-	-	-	Sten1	-	-	-	-	-	-	-	-	-	Sten1	-	-	-	-	-	-	-	-	-
AX-177639366	Aradu.A07	1207098	Sten1	-	-	-	-	-	-	-	-	-	-	-	-	-	-	-	-	-	-	-	-	-	-	-	-	-	-	-	-	-	Sten1	-	-	-	-	-	-	-	-	-	-	-	-	-	-	-	-
AX-147226980	Aradu.A07	1715115	Sten2	Sten1	Sten1	Sten1	Sten1	Sten1	Sten1	Sten1	Sten1	Sten1	Sten1	Sten1	Sten1	Sten1	Sten1	Sten1	Sten1	Sten1	Sten1	-	Sten1	Sten1	Sten1	Sten1	Sten1	Sten1	Sten1	-	Sten1	Sten1	Sten2	Sten1	Sten1	Sten1	Sten1	Sten1	Sten1	-	Sten1	Sten1	Sten1	Sten1	Sten1	Sten1	Sten1	Sten1	Sten1
AX-147254503	Aradu.A07	2502673	Sten2	-	-	-	-	-	-	-	-	-	-	-	-	-	-	-	-	-	Sten1	-	Sten1	-	-	-	Sten1	-	Sten1	-	Sten2	-	Sten1	-	Sten1	-	Sten1	-	-	-	-	-	-	-	-	-	-	-	-
AX-147227247	Aradu.A07	3935556	-	-	-	-	-	-	-	-	-	-	-	-	-	-	-	-	-	-	-	-	-	-	-	-	-	-	-	-	-	-	-	-	-	-	-	-	-	-	-	-	-	-	-	-	-	-	-
AX-147227267	Aradu.A07	4215693	-	-	-	-	-	-	-	-	-	-	-	-	-	-	-	-	-	-	-	-	-	-	-	-	-	-	-	-	-	-	-	-	-	-	-	-	-	-	-	-	-	-	-	-	-	-	-
AX-147227276	Aradu.A07	4359598	Sten2	-	-	-	-	-	-	-	-	-	-	-	-	-	-	-	-	-	Sten1	-	Sten1	-	-	-	Sten1	-	Sten1	-	Sten2	-	Sten1	-	Sten1	-	Sten1	-	-	-	-	-	-	-	-	-	-	-	-
AX-147227304	Aradu.A07	4510195	Sten2	-	-	-	-	-	-	-	-	-	-	-	-	-	-	-	-	-	Sten1	-	Sten1	-	-	-	Sten1	-	Sten1	-	Sten2	-	Sten1	-	Sten1	-	Sten1	-	-	-	-	-	-	-	-	-	-	-	-
AX-147227318	Aradu.A07	4560066	Sten2	-	-	-	-	-	-	-	-	-	-	-	-	-	-	-	-	-	Sten1	-	Sten1	-	-	-	Sten1	-	Sten1	-	Sten2	-	Sten1	-	Sten1	-	Sten1	-	-	-	-	-	-	-	-	-	-	-	-
AX-147254707	Aradu.A07	4808653	Sten2	-	-	-	Sten1	-	-	-	Sten1	-	-	-	Sten2	-	Sten1	-	-	-	-	Sten2	-	Sten1	-	-	-	-	-	Sten2	-	-	-	-	-	Sten2	-	Sten1	-	-	Sten1	-	Sten2	-	Sten1	-	Sten1	-	Sten1
AX-147227380	Aradu.A07	5325989	-	-	-	-	-	-	-	-	-	-	-	-	-	-	-	-	-	-	-	Sten1	-	-	-	-	-	-	-	Sten1	-	-	-	-	-	-	-	-	-	-	-	-	-	-	-	-	-	-	-
AX-147227390	Aradu.A07	5364934	Sten2	-	-	-	-	-	-	-	-	-	-	-	-	-	-	-	-	-	Sten1	-	Sten1	-	-	-	Sten1	-	Sten1	-	Sten2	-	Sten1	-	Sten1	-	Sten1	-	-	-	-	-	-	-	-	-	-	-	-
AX-147227391	Aradu.A07	5372319	Sten2	-	-	-	-	-	-	-	-	-	-	-	-	-	-	-	-	-	Sten1	-	Sten1	-	-	-	Sten1	-	Sten1	-	-	-	Sten1	-	Sten1	-	Sten1	-	-	-	-	-	-	-	-	-	-	-	-
AX-147227409	Aradu.A07	5513063	Sten2	-	-	-	-	-	-	-	-	-	-	-	-	-	-	-	-	-	Sten1	-	Sten1	-	-	-	Sten1	-	Sten1	-	Sten2	-	Sten1	-	Sten1	-	Sten1	-	-	-	-	-	-	-	-	-	-	-	-
AX-147227518	Aradu.A07	6901139	Sten1	-	-	-	-	-	-	-	-	-	-	-	-	-	-	-	-	-	-	-	-	-	-	-	-	-	-	-	-	-	Sten1	-	-	-	-	-	-	-	-	-	-	-	-	-	-	-	-
AX-147227580	Aradu.A07	8218053	Sten1	-	Sten1	-	Sten1	-	-	-	Sten1	-	Sten1	-	Sten1	-	-	-	Sten1	-	Sten1	-	Sten1	-	-	-	Sten1	-	Sten1	-	Sten1	-	Sten1	-	Sten1	-	Sten1	-	-	-	-	-	Sten1	-	Sten1	-	Sten1	-	Sten1
AX-147227606	Aradu.A07	8855622	-	-	Sten2	-	Sten1	-	-	-	Sten1	-	Sten1	-	Sten1	-	-	-	Sten2	-	Sten2	-	Sten1	-	-	-	Sten1	-	Sten1	-	Sten2	-	Sten1	-	Sten1	-	Sten1	-	-	-	-	-	Sten1	-	Sten1	-	Sten1	-	Sten1
AX-176803178	Aradu.A07	9729090	Sten2	-	-	-	Sten1	-	-	-	Sten1	-	Sten1	-	Sten1	-	-	-	Sten2	-	Sten2	-	Sten1	-	-	-	Sten1	-	Sten1	-	Sten2	-	Sten1	-	Sten1	-	Sten1	-	-	-	-	-	Sten1	-	Sten1	-	-	-	Sten1
AX-147227676	Aradu.A07	10930537	Sten2	-	Sten2	-	Sten1	-	-	-	Sten1	-	Sten1	-	Sten1	-	-	-	Sten2	-	Sten2	-	Sten1	-	-	-	Sten1	-	Sten1	-	Sten2	-	Sten1	-	Sten1	-	Sten1	-	-	-	-	-	Sten1	-	Sten1	-	-	-	Sten1
AX-147227805	Aradu.A07	14523193	-	-	-	-	-	-	-	-	-	-	-	-	-	-	-	-	-	-	-	-	-	-	-	-	-	-	-	-	-	-	-	-	-	-	-	-	-	-	-	-	-	-	-	-	-	-	-
AX-147227833	Aradu.A07	14860287	-	-	Sten2	-	Sten1	-	-	-	Sten1	-	Sten1	-	Sten1	-	-	-	Sten2	-	-	-	-	-	-	-	-	-	-	-	-	-	-	-	-	-	-	-	-	-	-	-	Sten1	-	Sten1	-	-	-	Sten1
AX-147227834	Aradu.A07	14860341	Sten2	-	Sten2	-	Sten1	-	-	-	Sten1	-	Sten1	-	Sten1	-	-	-	Sten1	-	-	-	-	-	-	-	-	-	-	-	-	-	-	-	-	-	-	-	-	-	-	-	Sten1	-	Sten1	-	-	-	Sten1
AX-147227840	Aradu.A07	15199143	Sten1	-	Sten1	-	Sten1	-	-	-	Sten1	-	Sten1	-	Sten1	-	-	-	Sten1	-	-	-	-	-	-	-	-	-	-	-	-	-	-	-	-	-	-	-	-	-	-	-	Sten1	-	Sten1	-	-	-	Sten1
AX-147255148	Aradu.A07	15218169	Sten1	-	Sten1	-	-	-	-	-	Sten1	-	Sten1	-	Sten1	-	-	-	Sten1	-	-	-	-	-	-	-	-	-	-	-	-	-	-	-	-	-	-	-	-	-	-	-	Sten1	-	-	-	-	-	Sten1
AX-147227917	Aradu.A07	17133488	Sten2	-	Sten1	-	Sten1	-	-	-	Sten1	-	Sten1	-	Sten1	-	-	-	Sten1	-	-	-	-	-	-	-	-	-	-	-	-	-	-	-	-	-	-	-	-	-	-	-	Sten1	-	Sten1	-	-	-	Sten1
AX-147227919	Aradu.A07	17218154	Sten1	-	Sten1	-	Sten1	-	-	-	Sten1	-	Sten1	-	-	-	-	-	Sten1	-	-	-	-	-	-	-	-	-	-	-	-	-	-	-	-	-	-	-	-	-	-	-	Sten1	-	Sten1	-	-	-	Sten1
AX-176791685	Aradu.A07	17302902	Sten2	-	-	-	Sten1	-	-	-	Sten1	-	Sten1	-	Sten1	-	-	-	Sten2	-	-	-	-	-	-	-	-	-	-	-	-	-	-	-	-	-	-	-	-	-	-	-	Sten1	-	Sten1	-	-	-	Sten1
AX-176806670	Aradu.A07	17626380	-	-	Sten2	-	Sten1	-	-	-	Sten2	-	Sten2	-	Sten2	-	-	-	-	-	-	-	-	-	-	-	-	-	-	-	-	-	-	-	-	Sten1	-	-	-	-	-	-	Sten2	-	Sten2	-	-	-	Sten1
AX-176812595	Aradu.A07	17643601	Sten1	-	Sten1	-	Sten1	-	-	-	-	-	-	-	Sten1	-	-	-	-	-	-	-	-	-	Sten1	-	-	-	-	-	-	-	-	-	-	Sten1	-	-	-	-	-	-	Sten1	-	Sten1	-	-	-	-
AX-176800052	Aradu.A07	17707397	Sten1	-	Sten1	-	Sten1	-	-	-	Sten1	-	Sten1	-	Sten1	-	-	-	Sten1	-	-	-	-	-	-	-	-	-	-	-	-	-	-	-	-	-	-	-	-	-	-	-	Sten1	-	Sten1	-	-	-	-
AX-176808027	Aradu.A07	17731546	Sten1	-	Sten1	-	Sten1	-	-	-	Sten1	-	Sten1	-	Sten1	-	-	-	Sten1	-	-	-	-	-	-	-	-	-	-	-	-	-	-	-	-	-	-	-	-	-	-	-	Sten1	-	Sten1	-	-	-	Sten1
AX-177638437	Aradu.A07	17731627	-	-	Sten1	-	Sten1	-	-	-	Sten1	-	Sten1	-	Sten1	-	-	-	Sten1	-	-	-	-	-	-	-	-	-	-	-	-	-	-	-	-	-	-	-	-	-	-	-	Sten1	-	Sten1	-	-	-	Sten1
AX-176816873	Aradu.A07	17754802	Sten1	-	Sten1	-	Sten1	-	-	-	Sten1	-	Sten1	-	Sten1	-	-	-	Sten1	-	-	-	-	-	-	-	-	-	-	-	-	-	-	-	-	-	-	-	-	-	-	-	Sten1	-	Sten1	-	-	-	Sten1
AX-147227930	Aradu.A07	17768688	Sten1	-	Sten1	-	Sten1	-	-	-	Sten1	-	Sten1	-	Sten1	-	-	-	Sten1	-	-	-	-	-	-	-	-	-	-	-	-	-	-	-	-	-	-	-	-	-	-	-	Sten1	-	Sten1	-	-	-	Sten1
AX-176804082	Aradu.A07	17772008	Sten1	-	Sten1	-	-	-	-	-	-	-	-	-	Sten1	-	-	-	Sten1	-	-	-	-	-	-	-	-	-	-	-	-	-	-	-	-	-	-	-	-	-	-	-	Sten1	-	Sten1	-	-	-	Sten1
AX-176807727	Aradu.A07	18169045	Sten1	-	Sten1	-	Sten1	-	-	-	Sten1	-	Sten1	-	Sten1	-	-	-	Sten1	-	-	-	-	-	-	-	-	-	-	-	-	-	-	-	-	-	-	-	-	-	-	-	Sten1	-	-	-	-	-	-
AX-176809163	Aradu.A07	18169049	Sten2	-	Sten2	-	Sten2	-	-	-	Sten2	-	Sten1	-	-	-	-	-	Sten2	-	-	-	-	-	-	-	-	-	-	-	-	-	-	-	-	-	-	-	-	-	-	-	Sten1	-	Sten1	-	-	-	Sten1
AX-176817824	Aradu.A07	18174560	Sten2	-	Sten2	-	Sten1	-	-	-	Sten1	-	Sten1	-	Sten1	-	-	-	Sten2	-	-	-	-	-	-	-	-	-	-	-	-	-	-	-	-	-	-	-	-	-	-	-	Sten1	-	Sten2	-	-	-	Sten1
AX-176820379	Aradu.A07	18174579	Sten1	-	Sten1	-	Sten1	-	-	-	-	-	Sten1	-	-	-	-	-	Sten1	-	-	-	-	-	-	-	-	-	-	-	-	-	-	-	-	-	-	-	-	-	-	-	-	-	Sten1	-	-	-	Sten1
AX-177640558	Aradu.A07	18174822	Sten1	-	Sten1	-	Sten1	-	-	-	Sten1	-	Sten1	-	Sten1	-	-	-	Sten1	-	-	-	-	-	-	-	-	-	-	-	-	-	-	-	-	-	-	-	-	-	-	-	Sten1	-	Sten1	-	-	-	Sten1
AX-176803839	Aradu.A07	18174900	Sten2	-	Sten2	-	Sten2	-	-	-	Sten2	-	Sten2	-	Sten2	-	-	-	Sten2	-	-	-	-	-	-	-	Sten1	-	-	-	Sten1	-	Sten1	-	-	-	-	-	-	-	-	-	Sten2	-	Sten2	-	-	-	Sten2
AX-176815878	Aradu.A07	18175074	Sten2	-	Sten2	-	Sten1	-	-	-	Sten1	-	Sten1	-	Sten1	-	-	-	-	-	-	-	-	-	-	-	-	-	-	-	-	-	-	-	-	-	-	-	-	-	-	-	Sten1	-	Sten1	-	-	-	Sten1
AX-176795094	Aradu.A07	18175193	Sten1	-	Sten1	-	-	-	-	-	Sten1	-	Sten1	-	Sten1	-	-	-	Sten1	-	-	-	-	-	-	-	-	-	-	-	-	-	-	-	-	-	-	-	-	-	-	-	Sten1	-	Sten1	-	-	-	Sten1
AX-176794604	Aradu.A07	18175255	-	-	Sten1	-	Sten1	-	-	-	Sten1	-	Sten1	-	Sten1	-	-	-	Sten1	-	-	-	-	-	-	-	-	-	-	-	-	-	-	-	-	-	-	-	-	-	-	-	Sten1	-	Sten1	-	-	-	Sten1
AX-176796760	Aradu.A07	18175303	-	-	Sten1	-	Sten1	-	-	-	Sten1	-	Sten1	-	Sten1	-	-	-	Sten1	-	-	-	-	-	-	-	-	-	-	-	-	-	-	-	-	-	-	-	-	-	-	-	Sten1	-	Sten1	-	-	-	Sten1
AX-176797040	Aradu.A07	18175313	Sten1	-	Sten1	-	Sten1	-	-	-	Sten1	-	Sten1	-	Sten1	-	-	-	Sten1	-	-	-	-	-	-	-	-	-	-	-	-	-	-	-	-	-	-	-	-	-	-	-	Sten1	-	Sten1	-	-	-	Sten1
AX-176794420	Aradu.A07	18175433	Sten1	-	Sten1	-	Sten1	-	-	-	Sten1	-	Sten1	-	Sten1	-	-	-	Sten1	-	-	-	-	-	-	-	-	-	-	-	-	-	-	-	-	-	-	-	-	-	-	-	Sten1	-	Sten1	-	-	-	Sten1
AX-176824167	Aradu.A07	18175433	Sten1	-	Sten1	-	Sten1	-	-	-	Sten1	-	Sten1	-	Sten1	-	-	-	Sten1	-	-	-	-	-	-	-	-	-	-	-	-	-	-	-	-	-	-	-	-	-	-	-	Sten1	-	Sten1	-	-	-	Sten1
AX-177637220	Aradu.A07	18175548	Sten1	-	Sten1	-	Sten1	-	-	-	Sten1	-	Sten1	-	Sten1	-	-	-	Sten1	-	-	-	-	-	-	-	-	-	-	-	-	-	-	-	-	-	-	-	-	-	-	-	Sten1	-	Sten1	-	-	-	Sten1
AX-176802048	Aradu.A07	18175575	Sten1	-	Sten1	-	Sten1	-	-	-	Sten1	-	Sten1	-	Sten1	-	-	-	Sten1	-	-	-	-	-	-	-	-	-	-	-	-	-	-	-	-	-	-	-	-	-	-	-	Sten1	-	Sten1	-	-	-	Sten1
AX-176796811	Aradu.A07	18175653	Sten2	-	Sten1	-	Sten1	-	-	-	Sten1	-	Sten1	-	Sten1	-	-	-	Sten1	-	-	-	-	-	-	-	-	-	-	-	-	-	-	-	-	-	-	-	-	-	-	-	Sten1	-	Sten1	-	-	-	Sten1
AX-176801360	Aradu.A07	18175936	Sten2	-	Sten2	-	Sten1	-	-	-	Sten1	-	-	-	Sten2	-	-	-	Sten2	-	-	-	-	-	-	-	-	-	-	-	-	-	-	-	-	-	-	-	-	-	-	-	Sten1	-	Sten1	-	-	-	Sten1
AX-176808628	Aradu.A07	18175967	Sten2	-	Sten2	-	Sten1	-	-	-	Sten1	-	Sten1	-	Sten1	-	-	-	Sten2	-	-	-	-	-	-	-	-	-	-	-	-	-	-	-	-	-	-	-	-	-	-	-	Sten1	-	Sten1	-	-	-	Sten1
AX-176810637	Aradu.A07	18176260	Sten2	-	Sten2	-	Sten2	-	-	-	Sten2	-	Sten2	-	Sten2	-	-	-	Sten2	Sten1	-	-	-	-	-	-	-	-	-	-	-	-	-	-	-	-	-	-	-	-	-	-	Sten2	-	Sten2	-	-	-	Sten2
AX-176802210	Aradu.A07	18176735	Sten2	-	Sten2	-	Sten1	-	-	-	-	-	Sten1	-	Sten1	-	-	-	Sten2	-	-	-	-	-	-	-	-	-	-	-	-	-	-	-	-	-	-	-	-	-	-	-	Sten2	-	Sten1	-	-	-	Sten1
AX-176809363	Aradu.A07	18176770	Sten2	-	Sten2	-	Sten1	-	-	-	Sten1	-	Sten1	-	Sten1	-	-	-	Sten2	-	-	-	-	-	-	-	-	-	-	-	-	-	-	-	-	-	-	-	-	-	-	-	Sten1	-	-	-	-	-	Sten1
AX-177639758	Aradu.A07	18176796	Sten2	-	Sten2	-	Sten1	-	-	-	Sten1	-	Sten1	-	Sten1	-	-	-	Sten2	-	-	-	-	-	-	-	-	-	-	-	-	-	-	-	-	-	-	-	-	-	-	-	Sten1	-	Sten1	-	-	-	Sten1
AX-176807286	Aradu.A07	18176872	-	-	Sten1	-	Sten1	-	-	-	Sten1	-	Sten1	-	-	-	-	-	Sten1	-	-	-	-	-	-	-	-	-	-	-	-	-	-	-	-	-	-	-	-	-	-	-	Sten1	-	Sten1	-	-	-	Sten1
AX-176800900	Aradu.A07	18176883	Sten2	-	Sten2	-	Sten1	-	-	-	Sten1	-	Sten1	-	Sten1	-	-	-	Sten1	-	-	-	-	-	-	-	-	-	-	-	-	-	-	-	-	-	-	-	-	-	-	-	Sten1	-	Sten1	-	-	-	Sten1
AX-176800881	Aradu.A07	18176920	Sten1	-	Sten1	-	-	-	-	-	Sten1	-	Sten1	-	Sten1	-	-	-	Sten1	-	-	-	-	-	-	-	-	-	-	-	-	-	-	-	-	-	-	-	-	-	-	-	Sten1	-	Sten1	-	-	-	Sten1
AX-176799773	Aradu.A07	18176943	-	-	Sten1	-	Sten1	-	-	-	Sten1	-	-	-	Sten1	-	-	-	Sten1	-	-	-	-	-	-	-	-	-	-	-	-	-	-	-	-	-	-	-	-	-	-	-	Sten1	-	Sten1	-	-	-	-
AX-176801743	Aradu.A07	18176946	Sten1	-	Sten1	-	-	-	-	-	-	-	Sten1	-	Sten1	-	-	-	Sten1	-	-	-	-	-	-	-	-	-	-	-	-	-	-	-	-	-	-	-	-	-	-	-	-	-	Sten1	Sten1	-	-	-
AX-176800791	Aradu.A07	18177083	Sten1	-	Sten1	-	-	-	-	-	Sten1	-	Sten1	-	Sten1	-	-	-	Sten1	-	-	-	-	-	-	-	-	-	-	-	-	-	-	-	-	-	-	-	-	-	-	-	Sten1	-	Sten1	-	-	-	Sten1
AX-176798667	Aradu.A07	18177119	Sten2	-	Sten2	-	Sten1	-	-	-	Sten1	-	Sten1	-	Sten1	-	-	-	-	-	-	-	-	-	-	-	-	-	-	-	-	-	-	-	-	-	-	-	-	-	-	-	Sten1	-	Sten1	-	-	-	Sten1
AX-176797254	Aradu.A07	18177448	Sten2	-	Sten2	-	Sten1	-	-	-	Sten1	-	Sten1	-	Sten1	-	-	-	Sten1	-	-	-	-	-	-	-	-	-	-	-	-	-	-	-	-	-	-	-	-	-	-	-	Sten1	-	Sten1	-	-	-	Sten1
AX-176802515	Aradu.A07	18177486	Sten2	-	Sten2	-	Sten1	-	-	-	-	-	Sten1	-	Sten1	-	-	-	Sten2	-	-	-	-	-	-	-	-	-	-	-	-	-	-	-	-	-	-	-	-	-	-	-	-	-	-	-	-	-	Sten1
AX-177638153	Aradu.A07	18177497	Sten2	-	Sten1	-	Sten1	-	-	-	Sten1	-	Sten1	-	Sten1	-	-	-	Sten1	-	-	-	-	-	-	-	-	-	-	-	-	-	-	-	-	-	-	-	-	-	-	-	Sten1	-	Sten1	-	-	-	Sten1
AX-176807804	Aradu.A07	18177556	Sten1	-	-	-	Sten1	-	-	-	Sten1	-	Sten1	-	Sten1	-	-	-	Sten1	-	-	-	-	-	-	-	-	-	-	-	-	-	-	-	-	-	-	-	-	-	-	-	Sten1	-	Sten1	-	-	-	Sten1
AX-176796200	Aradu.A07	18177607	Sten2	-	-	-	Sten1	-	-	-	Sten1	-	Sten1	-	Sten1	-	-	-	Sten1	-	-	-	-	-	-	-	-	-	-	-	-	-	-	-	-	-	-	-	-	-	-	-	Sten1	-	Sten1	-	-	-	-
AX-176813375	Aradu.A07	18177810	Sten1	-	Sten1	-	Sten1	-	-	-	Sten1	-	Sten1	-	Sten1	-	-	-	Sten1	-	-	-	-	-	-	-	-	-	-	-	-	-	-	-	-	-	-	-	-	-	-	-	Sten1	-	Sten1	-	-	-	Sten1
AX-176798213	Aradu.A07	18177857	Sten1	-	Sten1	-	Sten1	-	-	-	Sten1	-	Sten1	-	Sten1	-	-	-	Sten1	-	-	-	-	-	-	-	-	-	-	-	-	-	-	-	-	-	-	-	-	-	-	-	Sten1	-	Sten1	-	-	-	Sten1
AX-176792710	Aradu.A07	18178284	Sten1	-	Sten1	-	Sten1	-	-	-	Sten1	-	Sten1	-	Sten1	-	-	-	Sten1	-	-	-	-	-	-	-	-	-	-	-	-	-	-	-	-	-	-	-	-	-	-	-	Sten1	-	Sten1	-	-	-	Sten1
AX-177638186	Aradu.A07	18178505	Sten1	-	Sten1	-	-	-	-	-	-	-	Sten1	-	-	-	-	-	Sten1	-	-	-	-	-	-	-	-	-	-	-	-	-	-	-	-	-	-	-	-	-	-	-	Sten1	-	-	-	-	-	Sten1
AX-176798930	Aradu.A07	18178701	Sten1	-	Sten1	-	Sten1	-	-	-	Sten1	-	Sten1	-	Sten1	-	-	-	Sten1	-	-	-	-	-	-	-	-	-	-	-	-	-	-	-	-	-	-	-	-	-	-	-	Sten1	-	Sten1	-	-	-	Sten1
AX-176799137	Aradu.A07	18178777	Sten2	-	Sten2	-	Sten1	-	-	-	Sten1	-	-	-	Sten1	-	-	-	Sten2	-	-	-	-	-	-	-	-	-	-	-	-	-	-	-	-	-	-	-	-	-	-	-	Sten1	-	Sten1	-	-	-	-
AX-176809341	Aradu.A07	18178904	Sten1	-	Sten1	-	Sten1	-	-	-	Sten1	-	Sten1	-	Sten1	-	-	-	Sten1	-	-	-	-	-	-	-	-	-	-	-	-	-	-	-	-	-	-	-	-	-	-	-	Sten1	-	Sten1	-	-	-	Sten1
AX-176802256	Aradu.A07	18178939	Sten2	-	Sten2	-	Sten2	-	-	-	Sten2	-	Sten2	-	Sten2	-	-	-	Sten2	Sten1	-	-	-	-	-	-	Sten1	-	-	-	Sten1	-	Sten1	-	-	-	-	-	Sten1	-	-	-	Sten2	-	Sten2	-	-	-	Sten2
AX-176801381	Aradu.A07	18178972	Sten2	-	Sten2	-	Sten1	-	-	-	Sten1	-	Sten1	-	Sten1	-	-	-	Sten2	-	-	-	-	-	-	-	-	-	-	-	-	-	-	-	-	-	-	-	-	-	-	-	Sten1	-	Sten1	-	-	-	Sten1
AX-176801587	Aradu.A07	18179068	Sten2	-	Sten1	-	Sten1	-	-	-	Sten1	-	Sten1	-	Sten2	-	-	-	Sten1	-	-	-	-	-	-	-	-	-	-	-	-	-	-	-	-	Sten1	-	-	-	-	-	-	Sten2	-	Sten1	-	-	-	Sten1
AX-176794665	Aradu.A07	18179069	Sten1	-	Sten1	-	Sten1	-	-	-	Sten1	-	Sten1	-	Sten1	-	-	-	Sten1	-	-	-	-	-	-	-	-	-	-	-	-	-	-	-	-	-	-	-	-	-	-	-	Sten1	-	Sten1	-	-	-	Sten1
AX-176798775	Aradu.A07	18179075	Sten2	-	Sten2	-	Sten1	-	-	-	Sten1	-	Sten1	-	Sten1	-	-	-	Sten1	-	-	-	-	-	-	-	-	-	-	-	-	-	-	-	-	-	-	-	-	-	-	-	Sten1	-	Sten1	-	-	-	Sten1
AX-176814859	Aradu.A07	18179077	Sten1	-	Sten1	-	Sten1	-	-	-	Sten1	-	Sten1	-	Sten1	-	-	-	Sten1	-	-	-	-	-	-	-	-	-	-	-	-	-	-	-	-	-	-	-	-	-	-	-	Sten1	-	Sten1	-	-	-	Sten1
AX-176806596	Aradu.A07	18179140	Sten2	-	Sten2	-	Sten1	-	-	-	Sten1	-	Sten1	-	Sten1	-	-	-	Sten1	-	-	-	-	-	-	-	-	-	-	-	-	-	-	-	-	-	-	-	-	-	-	-	Sten1	-	Sten1	-	-	-	Sten1
AX-176801193	Aradu.A07	18179160	Sten2	-	Sten2	-	Sten2	-	-	-	Sten2	-	Sten2	-	Sten2	-	-	-	Sten2	Sten1	-	-	-	-	-	-	-	-	-	-	Sten1	-	Sten1	-	-	-	-	-	-	-	-	-	Sten2	-	Sten2	-	-	-	Sten2
AX-176799558	Aradu.A07	18179163	Sten2	-	Sten2	-	Sten1	-	-	-	Sten1	-	Sten1	-	Sten1	-	-	-	-	-	-	-	-	-	-	-	-	-	-	-	-	-	-	-	-	-	-	-	-	-	-	-	Sten1	-	Sten1	-	-	-	Sten1
AX-176812902	Aradu.A07	18179461	Sten1	-	Sten1	-	Sten1	-	-	-	Sten1	-	Sten1	-	Sten1	-	-	-	Sten1	-	-	-	-	-	-	-	-	-	-	-	-	-	-	-	-	-	-	-	-	-	-	-	Sten1	-	Sten1	-	-	-	Sten1
AX-176823773	Aradu.A07	18179526	Sten2	-	Sten2	-	Sten1	-	-	-	Sten1	-	Sten1	-	Sten1	-	-	-	Sten2	-	-	-	-	-	-	-	-	-	-	-	-	-	-	-	-	-	-	-	-	-	-	-	-	-	Sten1	-	-	-	Sten1
AX-176811945	Aradu.A07	18180024	Sten2	-	Sten1	-	Sten1	-	-	-	Sten1	-	Sten1	-	Sten1	-	-	-	Sten2	-	-	-	-	-	-	-	-	-	-	-	-	-	-	-	-	-	-	-	-	-	-	-	Sten1	-	Sten1	-	-	-	Sten1
AX-176812952	Aradu.A07	18180236	Sten1	-	Sten1	-	Sten1	-	-	-	Sten1	-	Sten1	-	Sten1	-	-	-	Sten1	-	-	-	-	-	-	-	-	-	-	-	-	-	-	-	-	-	-	-	-	-	-	-	Sten1	-	Sten1	-	-	-	Sten1
AX-177638835	Aradu.A07	18180239	Sten2	-	Sten2	-	Sten1	-	-	-	Sten1	-	Sten1	-	Sten1	-	-	-	Sten2	-	-	-	-	-	-	-	-	-	-	-	-	-	-	-	-	-	-	-	-	-	-	-	Sten1	-	Sten1	-	-	-	Sten1
AX-177638848	Aradu.A07	18180316	Sten2	-	Sten1	-	Sten1	-	-	-	Sten1	-	Sten1	-	Sten2	-	-	-	Sten1	-	-	-	-	-	-	-	-	-	-	-	-	-	-	-	-	-	-	-	-	-	-	-	Sten2	-	Sten1	-	-	-	Sten1
AX-176793162	Aradu.A07	18180358	Sten1	-	Sten1	-	Sten1	-	-	-	Sten1	-	Sten1	-	Sten1	-	-	-	Sten1	-	-	-	-	-	-	-	-	-	-	-	-	-	-	-	-	-	-	-	-	-	-	-	Sten1	-	Sten1	-	-	-	Sten1
AX-176817339	Aradu.A07	18180594	Sten1	-	Sten1	-	Sten1	-	-	-	Sten1	-	-	-	Sten1	-	-	-	Sten1	-	-	-	-	-	-	-	-	-	-	-	-	-	-	-	-	-	-	-	-	-	-	-	Sten1	-	Sten1	-	-	-	Sten1
AX-177641377	Aradu.A07	23406393	Sten1	-	Sten1	-	Sten1	-	-	-	-	-	-	-	Sten1	-	-	-	Sten1	-	-	-	-	-	-	-	-	-	-	-	-	-	-	-	-	-	-	-	-	-	-	-	Sten1	-	Sten1	-	-	-	Sten1
AX-147228073	Aradu.A07	23988146	-	-	-	-	-	-	-	-	-	-	-	-	-	-	-	-	-	-	-	-	-	-	-	-	-	-	-	-	-	-	-	-	-	-	-	-	-	-	-	-	-	-	-	-	-	-	-
AX-176802411	Aradu.A07	24823307	Sten1	-	-	-	-	-	-	-	Sten1	-	Sten1	-	Sten1	-	Sten1	-	-	-	-	-	-	-	-	-	-	-	-	-	-	-	-	-	-	-	-	-	-	-	Sten1	-	-	-	Sten1	-	-	-	-
AX-176801245	Aradu.A07	26175719	Sten1	-	-	-	-	-	-	-	-	-	-	-	-	-	-	-	-	-	-	-	-	-	-	-	-	-	-	-	-	-	-	-	-	-	-	-	-	-	-	-	-	-	-	-	-	-	-
AX-177639461	Aradu.A07	26203823	Sten1	-	-	-	-	-	-	-	-	-	-	-	-	-	-	-	-	-	-	-	-	-	-	-	-	-	-	-	-	-	-	-	-	-	-	-	-	-	-	-	-	-	-	-	-	-	-
AX-176800926	Aradu.A07	26204759	Sten1	Sten1	-	-	-	-	-	-	-	-	-	-	-	-	-	-	-	-	-	-	-	-	-	-	-	-	-	-	-	-	-	-	-	-	-	-	-	-	-	-	-	-	-	-	-	-	-
AX-177638571	Aradu.A07	26329688	Sten1	-	-	-	-	-	-	-	-	-	-	-	-	-	-	-	-	-	-	-	-	-	-	-	-	-	-	-	-	-	-	-	-	-	-	-	-	-	-	-	-	-	-	-	-	-	-
AX-147228146	Aradu.A07	28320911	Sten2	-	-	-	-	-	-	-	-	-	-	-	-	-	-	-	-	-	-	-	-	-	-	-	-	-	-	-	-	-	-	-	-	-	-	-	-	-	-	-	-	-	-	-	-	-	-
AX-176815251	Aradu.A07	29037518	Sten1	-	-	-	-	-	-	-	-	-	-	-	-	-	-	-	-	-	-	-	-	-	-	-	-	-	-	-	-	-	-	-	-	-	-	-	-	-	-	-	-	-	-	-	-	-	-
AX-177642025	Aradu.A07	34314337	Sten1	-	-	-	-	-	-	-	-	-	-	-	-	-	-	-	-	-	-	-	-	-	-	-	-	-	-	-	-	-	-	-	-	-	-	-	-	-	-	-	-	-	-	-	-	-	-
AX-147228199	Aradu.A07	34519088	Sten1	-	-	-	-	-	-	-	-	-	-	-	-	-	-	-	-	-	-	-	-	-	-	-	-	-	-	-	-	-	-	-	-	-	-	-	-	-	-	-	-	-	-	-	-	-	-
AX-176821072	Aradu.A07	36655812	-	-	-	-	-	-	-	-	-	-	-	-	-	-	-	-	-	-	-	-	-	-	-	-	-	-	-	-	-	-	-	-	-	-	-	-	-	-	-	-	-	-	-	-	-	-	-
AX-147228270	Aradu.A07	38770197	Sten2	-	-	-	-	-	-	-	-	-	-	-	-	-	-	-	-	-	-	-	-	-	-	-	-	-	-	-	-	-	-	-	-	-	-	-	-	-	-	-	-	-	-	-	-	-	-
AX-176807964	Aradu.A07	40722763	Sten2	-	-	-	-	-	-	-	-	-	-	-	-	-	-	-	-	-	-	-	-	-	-	-	-	-	-	-	-	-	-	-	-	-	-	-	-	-	-	-	-	-	-	-	-	-	-
AX-147228382	Aradu.A07	49949867	Sten1	-	-	-	-	-	-	-	-	-	-	-	-	-	-	-	-	-	-	-	-	-	-	-	-	-	-	-	-	-	-	-	-	-	-	-	-	-	-	-	-	-	-	-	-	-	-
AX-177643396	Aradu.A07	53903274	Sten1	-	-	-	-	-	-	-	-	-	-	-	-	-	-	-	-	-	-	-	-	-	-	-	-	-	-	-	-	-	-	-	-	-	-	-	-	-	-	-	-	-	-	-	-	-	-
AX-177640670	Aradu.A07	53985964	-	-	-	-	-	-	-	-	-	-	-	-	-	-	-	-	-	-	-	-	-	-	-	-	-	-	-	-	-	-	-	-	-	-	-	-	-	-	-	-	-	-	-	-	-	-	-
AX-147228550	Aradu.A07	60064185	Sten2	-	-	-	-	-	-	-	-	-	-	-	-	-	-	-	-	-	-	-	-	-	-	-	-	-	-	-	-	-	-	-	-	-	-	-	-	-	-	-	-	-	-	-	-	-	-
AX-177641551	Aradu.A07	60217232	-	-	-	-	-	-	-	-	-	-	-	-	-	-	-	-	-	-	-	-	-	-	-	-	-	-	-	-	-	-	-	-	-	-	-	-	-	-	-	-	-	-	-	-	-	-	-
AX-147228566	Aradu.A07	61354243	Sten2	-	-	-	-	-	-	-	-	-	-	-	-	-	-	-	-	-	-	-	-	-	-	-	-	-	-	-	-	-	-	-	-	-	-	-	-	-	-	-	-	-	-	-	-	-	-
AX-147228576	Aradu.A07	62398239	Sten2	-	-	-	-	-	-	-	-	-	-	-	-	-	-	-	-	-	-	-	-	-	-	-	-	-	-	-	-	-	-	-	-	-	-	-	-	-	-	-	-	-	-	-	-	-	-
AX-147228581	Aradu.A07	63185572	-	-	-	-	-	-	-	-	-	-	-	-	-	-	-	-	-	-	-	-	-	-	-	-	-	-	-	-	-	-	-	-	-	-	-	-	-	-	-	-	-	-	-	-	-	-	-
AX-147228586	Aradu.A07	63674899	Sten2	-	-	-	-	-	-	-	-	-	-	-	-	-	-	-	-	-	-	-	-	-	-	-	-	-	-	-	-	-	-	-	-	-	-	-	-	-	-	-	-	-	-	-	-	-	-
AX-147228590	Aradu.A07	64213755	Sten1	-	-	-	-	-	-	-	-	-	-	-	-	-	-	-	-	-	-	-	-	-	-	-	-	-	-	-	-	-	-	-	-	-	-	-	-	-	-	-	-	-	-	-	-	-	-
AX-176820084	Aradu.A07	64335562	Sten1	-	-	-	-	-	-	-	-	-	-	-	-	-	-	-	-	-	-	-	-	-	-	-	-	-	-	-	-	-	-	-	-	-	-	-	-	-	-	-	-	-	-	-	-	-	-
AX-177637816	Aradu.A07	65413754	-	-	-	-	-	-	-	-	-	-	-	-	-	-	-	-	-	-	-	-	-	-	-	-	-	-	-	-	-	-	-	-	-	-	-	-	-	-	-	-	-	-	-	-	-	-	-
AX-147228634	Aradu.A07	65957786	Sten1	-	-	-	-	-	-	-	-	-	-	-	-	-	-	-	-	-	-	-	-	-	-	-	-	-	-	-	-	-	-	-	-	-	-	-	-	-	-	-	-	-	-	-	-	-	-
AX-147228658	Aradu.A07	67162381	Sten2	-	-	-	-	-	-	-	-	-	-	-	-	-	-	-	-	-	-	-	-	-	-	-	-	-	-	-	-	-	-	-	-	-	-	-	-	-	-	-	-	-	-	-	-	-	-
AX-176801658	Aradu.A07	68943274	-	-	-	-	-	-	-	-	-	-	-	-	-	-	-	-	-	-	-	-	-	-	-	-	-	-	-	-	-	-	-	-	-	-	-	-	-	-	-	-	-	-	-	-	-	-	-
AX-147228738	Aradu.A07	69596041	Sten1	-	-	-	-	-	-	-	-	-	-	-	-	-	-	-	-	Sten1	-	-	-	-	-	-	-	-	-	-	-	-	-	-	-	-	-	-	-	-	-	-	-	-	-	-	-	-	-
AX-147228759	Aradu.A07	70123570	Sten2	-	-	-	-	-	-	-	-	-	-	-	-	-	-	-	-	-	-	-	-	-	-	-	-	-	-	-	-	-	-	-	-	-	-	-	-	-	-	-	-	-	-	-	-	-	-
AX-147228782	Aradu.A07	71054281	Sten1	-	-	-	-	-	-	-	-	-	-	-	-	-	-	-	-	-	-	-	-	-	-	-	-	-	-	-	-	-	-	-	-	-	-	-	-	-	-	-	-	-	-	-	-	-	-
AX-147228785	Aradu.A07	71124776	Sten1	-	-	-	-	-	-	-	-	-	-	-	-	-	-	-	-	-	-	-	-	-	-	-	-	-	-	-	-	-	-	-	-	-	-	-	-	-	-	-	-	-	-	-	-	-	-
AX-147228791	Aradu.A07	71387264	Sten2	-	-	-	-	-	-	-	-	-	-	-	-	-	-	-	-	-	-	-	-	-	-	-	-	-	-	-	-	-	-	-	-	-	-	-	-	-	-	-	-	-	-	-	-	-	-
AX-147256944	Aradu.A07	71736391	Sten1	-	-	-	-	-	-	-	-	-	-	-	-	-	-	-	-	-	-	-	-	-	-	-	-	-	-	-	-	-	-	-	-	-	-	-	-	-	-	-	-	-	-	-	-	-	-
AX-147228852	Aradu.A07	72094208	Sten1	-	Sten1	-	Sten1	-	-	-	-	-	-	-	-	-	-	-	Sten1	-	Sten1	-	-	-	-	-	-	-	-	-	-	-	-	-	-	-	-	-	-	-	-	-	-	-	-	-	-	-	-
AX-177643823	Aradu.A07	72679285	Sten2	-	-	-	-	-	-	-	-	-	-	-	-	-	-	-	-	-	-	-	-	-	-	-	-	-	-	-	-	-	-	-	-	-	-	-	-	-	-	-	-	-	-	-	-	-	-
AX-147228982	Aradu.A07	74519999	Sten1	-	-	-	-	-	-	-	-	-	-	-	-	-	-	-	-	-	-	-	-	-	-	-	-	-	-	-	-	-	-	-	-	-	-	-	-	-	-	-	-	-	-	-	-	-	-
AX-176821410	Aradu.A07	75852917	Sten1	-	-	-	-	-	-	-	-	-	-	-	-	-	-	-	-	-	-	-	-	-	-	-	-	-	-	-	-	-	-	-	-	-	-	-	-	-	-	-	-	-	-	-	-	-	-
AX-147229051	Aradu.A07	76344679	Sten2	-	-	-	-	-	-	-	-	-	-	-	-	-	-	-	-	-	-	-	-	-	-	-	-	-	-	-	-	-	-	-	-	-	-	-	-	-	-	-	-	-	-	-	-	-	-
AX-177643546	Aradu.A07	77607168	Sten1	-	-	-	-	-	-	-	-	-	-	-	-	-	-	-	-	-	-	-	-	-	-	-	-	-	-	-	-	-	-	-	-	-	-	-	-	-	-	-	-	-	-	-	-	-	-
AX-176797898	Aradu.A08	1891349	Sten1	-	-	-	-	-	-	-	-	-	-	-	-	-	-	-	-	-	-	-	-	-	-	-	-	-	-	-	-	-	-	-	-	-	-	-	-	-	-	-	-	-	-	-	-	-	-
AX-177644562	Aradu.A08	2880609	-	-	-	-	-	-	-	-	-	-	-	-	-	-	-	-	-	-	-	-	-	-	-	-	-	-	-	-	-	-	-	-	-	-	-	-	-	-	-	-	-	-	-	-	-	-	-
AX-147229255	Aradu.A08	2897351	Sten1	-	-	-	-	-	-	-	-	-	-	-	-	-	-	-	-	-	-	-	-	-	-	-	-	-	-	-	-	-	-	-	-	-	-	-	-	-	-	-	-	-	-	-	-	-	-
AX-147255960	Aradu.A08	3402445	Sten1	-	-	-	-	-	-	-	-	-	-	-	-	-	-	-	-	-	-	-	-	-	-	-	-	-	-	-	-	-	-	-	-	-	-	-	-	-	-	-	-	-	-	-	-	-	-
AX-147229294	Aradu.A08	4139896	Sten1	-	-	-	-	-	-	-	-	-	-	-	-	-	-	-	-	-	-	-	-	-	-	-	-	-	-	-	-	-	-	-	-	-	-	-	-	-	-	-	-	-	-	-	-	-	-
AX-147255922	Aradu.A08	4406711	Sten1	-	-	-	-	-	-	-	-	-	-	-	-	-	-	-	-	-	-	-	-	-	-	-	-	-	-	-	-	-	-	-	-	-	-	-	-	-	-	-	-	-	-	-	-	-	-
AX-147229346	Aradu.A08	4440864	Sten1	-	-	-	-	-	-	-	-	-	-	-	-	-	-	-	-	-	-	-	-	-	-	-	-	-	-	-	-	-	-	-	-	-	-	-	-	-	-	-	-	-	-	-	-	-	-
AX-147229410	Aradu.A08	4910322	Sten1	-	-	-	-	-	-	-	-	-	-	-	-	-	-	-	-	-	-	-	-	-	-	-	-	-	-	-	-	-	-	-	-	-	-	-	-	-	-	-	-	-	-	-	-	-	-
AX-177644043	Aradu.A08	4968179	Sten1	-	-	-	-	-	-	-	-	-	-	-	-	-	-	-	-	-	-	-	-	-	-	-	-	-	-	-	-	-	-	-	-	-	-	-	-	-	-	-	-	-	-	-	-	-	-
AX-177643611	Aradu.A08	4968243	Sten1	-	-	-	-	-	-	-	-	-	-	-	-	-	-	-	-	-	-	-	-	-	-	-	-	-	-	-	-	-	-	-	-	-	-	-	-	-	-	-	-	-	-	-	-	-	-
AX-177639701	Aradu.A08	5355456	Sten1	-	-	-	-	-	-	-	-	-	-	-	-	-	-	-	-	-	-	-	-	-	-	-	-	-	-	-	-	-	-	-	-	-	-	-	-	-	-	-	-	-	-	-	-	-	-
AX-177641828	Aradu.A08	5424773	-	-	-	-	-	-	-	-	-	-	-	-	-	-	-	-	-	-	-	-	-	-	-	-	-	-	-	-	-	-	-	-	-	-	-	-	-	-	-	-	-	-	-	-	-	-	-
AX-147229479	Aradu.A08	5572280	Sten1	-	-	-	-	-	-	-	-	-	-	-	-	-	-	-	-	-	-	-	-	-	-	-	-	-	-	-	-	-	-	-	-	-	-	-	-	-	-	-	-	-	-	-	-	-	-
AX-147229481	Aradu.A08	5572430	Sten1	-	-	-	-	-	-	-	-	-	-	-	-	-	-	-	-	-	-	-	-	-	-	-	-	-	-	-	-	-	-	-	-	-	-	-	-	-	-	-	-	-	-	-	-	-	-
AX-177640629	Aradu.A08	6355810	Sten1	-	-	-	-	-	-	-	-	-	-	-	-	-	-	-	-	-	-	-	-	-	-	-	-	-	-	-	-	-	-	-	-	-	-	-	-	-	-	-	-	-	-	-	-	-	-
AX-147229605	Aradu.A08	6866736	Sten1	-	-	-	-	-	-	-	-	-	-	-	-	-	-	-	-	-	-	-	-	-	-	-	-	-	-	-	-	-	-	-	-	-	-	-	-	-	-	-	-	-	-	-	-	-	-
AX-147229709	Aradu.A08	8571791	Sten1	-	-	-	-	-	-	-	-	-	-	-	-	-	-	-	-	-	-	-	-	-	-	-	-	-	-	-	-	-	-	-	-	-	-	-	-	-	-	-	-	-	-	-	-	-	-
AX-177641745	Aradu.A08	8857956	Sten2	-	-	-	Sten1	-	Sten1	-	-	-	Sten1	-	Sten2	-	-	-	-	-	-	-	-	Sten1	-	-	-	Sten1	-	-	-	-	-	Sten1	-	Sten2	-	-	-	-	-	-	Sten2	-	-	-	Sten1	-	-
AX-147229729	Aradu.A08	8966026	Sten1	-	-	-	-	-	-	-	-	-	-	-	-	-	-	-	-	-	-	-	-	-	-	-	-	-	-	-	-	-	-	-	-	-	-	-	-	-	-	-	-	-	-	-	-	-	-
AX-147229737	Aradu.A08	9220360	Sten1	-	-	-	-	-	-	-	-	-	-	-	-	-	-	-	-	-	-	-	-	-	-	-	-	-	-	-	-	-	-	-	-	-	-	-	-	-	-	-	-	-	-	-	-	-	-
AX-147229740	Aradu.A08	9346039	Sten1	-	-	-	-	-	-	-	-	-	-	-	-	-	-	-	-	-	-	-	-	-	-	-	-	-	-	-	-	-	-	-	-	-	-	-	-	-	-	-	-	-	-	-	-	-	-
AX-147229763	Aradu.A08	10011940	Sten1	-	-	-	-	-	-	-	-	-	-	-	-	-	-	-	-	-	-	-	-	-	-	-	-	-	-	-	-	-	-	-	-	-	-	-	-	-	-	-	-	-	-	-	-	-	-
AX-177637388	Aradu.A08	10248663	-	-	-	-	-	-	-	-	-	-	-	-	-	-	-	-	-	-	-	-	-	-	-	-	-	-	-	-	-	-	-	-	-	-	-	-	-	-	-	-	-	-	-	-	-	-	-
AX-177637477	Aradu.A08	10906698	-	-	-	-	-	-	-	-	-	-	-	-	-	-	-	-	-	-	-	-	-	-	-	-	-	-	-	-	-	-	-	-	-	-	-	-	-	-	-	-	-	-	-	-	-	-	-
AX-147229813	Aradu.A08	11067219	Sten1	-	-	-	-	-	-	-	-	-	-	-	-	-	-	-	-	-	-	-	-	-	-	-	-	-	-	-	-	-	-	-	-	-	-	-	-	-	-	-	-	-	-	-	-	-	-
AX-147229845	Aradu.A08	11536813	Sten2	-	-	-	-	-	-	-	-	-	-	-	-	-	-	-	-	-	-	-	-	-	-	-	-	-	-	-	-	-	-	-	-	-	-	-	-	-	-	-	-	-	-	-	-	-	-
AX-147229852	Aradu.A08	11713918	Sten1	-	-	-	-	-	-	-	-	-	-	-	-	-	-	-	-	-	-	-	-	-	-	-	-	-	-	-	-	-	-	-	-	-	-	-	-	-	-	-	-	-	-	-	-	-	-
AX-147229882	Aradu.A08	12093185	Sten1	-	-	-	-	-	-	-	-	-	-	-	-	-	-	-	-	-	-	-	-	-	-	-	-	-	-	-	-	-	-	-	-	-	-	-	-	-	-	-	-	-	-	-	-	-	-
AX-147229917	Aradu.A08	12912372	Sten1	-	-	-	-	-	-	-	-	-	-	-	-	-	-	-	-	-	-	-	-	-	-	-	-	-	-	-	-	-	-	-	-	-	-	-	-	-	-	-	-	-	-	-	-	-	-
AX-147229992	Aradu.A08	14297495	Sten1	-	-	-	-	-	-	-	-	-	-	-	-	-	-	-	-	-	-	-	-	-	-	-	-	-	-	-	-	-	-	-	-	-	-	-	-	-	-	-	-	-	-	-	-	-	-
AX-147230049	Aradu.A08	15036606	Sten1	-	-	-	-	-	-	-	-	-	-	-	-	-	-	-	-	-	-	-	-	-	-	-	-	-	-	-	-	-	-	-	-	-	-	-	-	-	-	-	-	-	-	-	-	-	-
AX-147230087	Aradu.A08	15257443	Sten1	-	-	-	-	-	-	-	-	-	-	-	-	-	-	-	-	-	-	-	-	-	-	-	-	-	-	-	-	-	-	-	-	-	-	-	-	-	-	-	-	-	-	-	-	-	-
AX-147230088	Aradu.A08	15258018	Sten1	-	-	-	-	-	-	-	-	-	-	-	-	-	-	-	-	-	-	-	-	-	-	-	-	-	-	-	-	-	-	-	-	-	-	-	-	-	-	-	-	-	-	-	-	-	-
AX-147230108	Aradu.A08	15660388	Sten1	-	-	-	-	-	-	-	-	-	-	-	-	-	-	-	-	-	-	-	-	-	-	-	-	-	-	-	-	-	-	-	-	-	-	-	-	-	-	-	-	-	-	-	-	-	-
AX-147230121	Aradu.A08	15977007	Sten1	-	-	-	-	-	-	-	-	-	-	-	-	-	-	-	-	-	-	-	-	-	-	-	-	-	-	-	-	-	-	-	-	-	-	-	-	-	-	-	-	-	-	-	-	-	-
AX-147230174	Aradu.A08	16544284	Sten1	-	-	-	-	-	-	-	-	-	-	-	-	-	-	-	-	-	-	-	-	-	-	-	-	-	-	-	-	-	-	-	-	-	-	-	-	-	-	-	-	-	-	-	-	-	-
AX-147230197	Aradu.A08	16894853	Sten1	-	-	-	-	-	-	-	-	-	-	-	-	-	-	-	-	-	-	-	-	-	-	-	-	-	-	-	-	-	-	-	-	-	-	-	-	-	-	-	-	-	-	-	-	-	-
AX-147230223	Aradu.A08	17706521	Sten1	-	-	-	-	-	-	-	-	-	-	-	-	-	-	-	-	-	-	-	-	-	-	-	-	-	-	-	-	-	-	-	-	-	-	-	-	-	-	-	-	-	-	-	-	-	-
AX-147230224	Aradu.A08	17707100	Sten1	-	-	-	-	-	-	-	-	-	-	-	-	-	-	-	-	-	-	-	-	-	-	-	-	-	-	-	-	-	-	-	-	-	-	-	-	-	-	-	-	-	-	-	-	-	-
AX-147230319	Aradu.A08	23241307	Sten1	-	-	-	-	-	-	-	-	-	-	-	-	-	-	-	-	-	-	-	-	-	-	-	-	-	-	-	-	-	-	-	-	-	-	-	-	-	-	-	-	-	-	-	-	-	-
AX-177641349	Aradu.A08	24424438	-	-	-	-	-	-	-	-	-	-	-	-	-	-	-	-	-	-	-	-	-	-	-	-	-	-	-	-	-	-	-	-	-	-	-	-	-	-	-	-	-	-	-	-	-	-	-
AX-147230402	Aradu.A08	24455849	-	-	-	-	-	-	-	-	-	-	-	-	-	-	-	-	-	-	-	-	-	-	-	-	-	-	-	-	-	-	-	-	-	-	-	-	-	-	-	-	-	-	-	-	-	-	-
AX-147230419	Aradu.A08	24793059	Sten1	-	-	-	-	-	-	-	-	-	-	-	-	-	-	-	-	-	-	-	-	-	-	-	-	-	-	-	-	-	-	-	-	-	-	-	-	-	-	-	-	-	-	-	-	-	-
AX-147230422	Aradu.A08	25003355	Sten1	-	-	-	-	-	-	-	-	-	-	-	-	-	-	-	-	-	-	-	-	-	-	-	-	-	-	-	-	-	-	-	-	-	-	-	-	-	-	-	-	-	-	-	-	-	-
AX-147230432	Aradu.A08	25082727	Sten1	-	-	-	-	-	-	-	-	-	-	-	-	-	-	-	-	-	-	-	-	-	-	-	-	-	-	-	-	-	-	-	-	-	-	-	-	-	-	-	-	-	-	-	-	-	-
AX-147230437	Aradu.A08	25180600	Sten1	-	-	-	-	-	-	-	-	-	-	-	-	-	-	-	-	-	-	-	-	-	-	-	-	-	-	-	-	-	-	-	-	-	-	-	-	-	-	-	-	-	-	-	-	-	-
AX-147230439	Aradu.A08	25222189	Sten1	-	-	-	-	-	-	-	-	-	-	-	-	-	-	-	-	-	-	-	-	-	-	-	-	-	-	-	-	-	-	-	-	-	-	-	-	-	-	-	-	-	-	-	-	-	-
AX-147230453	Aradu.A08	25527288	Sten1	-	-	-	-	-	-	-	-	-	-	-	-	-	-	-	-	-	-	-	-	-	-	-	-	-	-	-	-	-	-	-	-	-	-	-	-	-	-	-	-	-	-	-	-	-	-
AX-147230471	Aradu.A08	25870941	Sten1	-	-	-	-	-	-	-	-	-	-	-	-	-	-	-	-	-	-	-	-	-	-	-	-	-	-	-	-	-	-	-	-	-	-	-	-	-	-	-	-	-	-	-	-	-	-
AX-147230499	Aradu.A08	26344960	Sten1	-	-	-	-	-	-	-	-	-	-	-	-	-	-	-	-	-	-	-	-	-	-	-	-	-	-	-	-	-	-	-	-	-	-	-	-	-	-	-	-	-	-	-	-	-	-
AX-147230507	Aradu.A08	26553699	Sten1	-	-	-	-	-	-	-	-	-	-	-	-	-	-	-	-	-	-	-	-	-	-	-	-	-	-	-	-	-	-	-	-	-	-	-	-	-	-	-	-	-	-	-	-	-	-
AX-147230532	Aradu.A08	27221774	Sten1	-	-	-	-	-	-	-	-	-	-	-	-	-	-	-	-	-	-	-	-	-	-	-	-	-	-	-	-	-	-	-	-	-	-	-	-	-	-	-	-	-	-	-	-	-	-
AX-177641093	Aradu.A08	27498253	Sten1	-	-	-	-	-	-	-	-	-	-	-	-	-	-	-	-	-	-	-	-	-	-	-	-	-	-	-	-	-	-	-	-	-	-	-	-	-	-	-	-	-	-	-	-	-	-
AX-176791657	Aradu.A08	27581360	Sten1	-	-	-	-	-	-	-	-	-	-	-	-	-	-	-	-	-	-	-	-	-	-	-	-	-	-	-	-	-	-	-	-	-	-	-	-	-	-	-	-	-	-	-	-	-	-
AX-147230636	Aradu.A08	29019016	Sten1	-	-	-	-	-	-	-	-	-	-	-	-	-	-	-	-	-	-	-	-	-	-	-	-	-	-	-	-	-	-	-	-	-	-	-	-	-	-	-	-	-	-	-	-	-	-
AX-177642006	Aradu.A08	29642173	-	-	-	Sten1	-	-	-	Sten1	-	-	-	-	-	-	-	-	-	-	-	Sten1	-	-	-	Sten1	-	-	-	-	Sten1	-	-	-	-	-	Sten1	-	-	-	-	-	-	Sten1	-	-	-	-	-
AX-147230672	Aradu.A08	29666660	Sten1	-	-	-	-	-	-	-	-	-	-	-	-	-	-	-	-	-	-	-	-	-	-	-	-	-	-	-	-	-	-	-	-	-	-	-	-	-	-	-	-	-	-	-	-	-	-
AX-147230776	Aradu.A08	31537551	Sten2	-	-	-	-	-	-	-	-	-	-	-	-	-	-	-	-	-	-	-	-	-	-	-	-	-	-	-	-	-	-	-	-	-	-	-	-	-	-	-	-	-	-	-	-	-	-
AX-177643125	Aradu.A08	32566261	Sten1	-	-	-	-	-	-	-	-	-	-	-	-	-	-	-	-	-	-	-	-	-	Sten1	-	-	-	-	-	-	-	-	-	-	-	-	-	-	-	-	-	-	-	-	-	-	-	-
AX-177639114	Aradu.A08	33888067	Sten1	-	-	-	-	-	-	-	-	-	-	-	-	-	-	-	-	-	-	-	-	-	-	-	-	-	-	-	-	-	-	-	-	-	-	-	-	-	-	-	-	-	-	-	-	-	-
AX-177641792	Aradu.A08	34545244	-	-	-	-	-	-	-	-	-	-	-	-	-	-	-	-	-	-	-	-	-	-	-	-	-	-	-	-	-	-	-	-	-	-	-	-	-	-	-	-	-	-	-	-	-	-	-
AX-147230973	Aradu.A08	35429851	-	-	-	-	-	-	-	-	-	-	-	-	-	-	-	-	-	-	-	-	-	-	-	-	-	-	-	-	-	-	-	-	-	-	-	-	-	-	-	-	-	-	-	-	-	-	-
AX-147231077	Aradu.A08	37475975	Sten1	-	-	-	-	-	-	-	-	-	-	-	-	-	-	-	-	-	-	-	-	-	-	-	-	-	-	-	-	-	-	-	-	-	-	-	-	-	-	-	-	-	-	-	-	-	-
AX-147231118	Aradu.A08	38153059	Sten1	-	-	-	-	-	-	-	-	-	-	-	-	-	-	-	-	-	-	-	-	-	-	-	-	-	-	-	-	-	-	-	-	-	-	-	-	-	-	-	-	-	-	-	-	-	-
AX-147231126	Aradu.A08	38180605	Sten1	-	-	-	-	-	-	-	-	-	-	-	-	-	-	-	-	-	-	-	-	-	-	-	-	-	-	-	-	-	-	-	-	-	-	-	-	-	-	-	-	-	-	-	-	-	-
AX-147231135	Aradu.A08	38254290	Sten1	-	-	-	-	-	-	-	-	-	-	-	-	-	-	-	-	-	-	-	-	-	-	-	-	-	-	-	-	-	-	-	-	-	-	-	-	-	-	-	-	-	-	-	-	-	-
AX-147231148	Aradu.A08	38319070	Sten1	-	-	-	-	-	-	-	-	-	-	-	-	-	-	-	-	-	-	-	-	-	-	-	-	-	-	-	-	-	-	-	-	-	-	-	-	-	-	-	-	-	-	-	-	-	-
AX-147231151	Aradu.A08	38356674	Sten1	-	-	-	-	-	-	-	-	-	-	-	-	-	-	-	-	-	-	-	-	-	-	-	-	-	-	-	-	-	-	-	-	-	-	-	-	-	-	-	-	-	-	-	-	-	-
AX-147231177	Aradu.A08	38565960	Sten2	-	-	-	-	-	-	-	-	-	-	-	-	-	-	-	-	-	-	-	-	-	-	-	-	-	-	-	-	-	-	-	-	-	-	-	-	-	-	-	-	-	-	-	-	-	-
AX-147231204	Aradu.A08	39171433	Sten1	-	-	-	-	-	-	-	-	-	-	-	-	-	-	-	-	-	-	-	-	-	-	-	-	-	-	-	-	-	-	-	-	-	-	-	-	-	-	-	-	-	-	-	-	-	-
AX-147231206	Aradu.A08	39208957	Sten1	-	-	-	-	-	-	-	-	-	-	-	-	-	-	-	-	-	-	-	-	-	-	-	-	-	-	-	-	-	-	-	-	-	-	-	-	-	-	-	-	-	-	-	-	-	-
AX-177637628	Aradu.A08	39262422	Sten1	-	-	-	-	-	-	-	-	-	-	-	-	-	-	-	-	-	-	-	-	-	-	-	-	-	-	-	-	-	-	-	-	-	-	-	-	-	-	-	-	-	-	-	-	-	-
AX-147231272	Aradu.A08	40053900	Sten1	-	-	-	-	-	-	-	-	-	-	-	-	-	-	-	-	-	-	-	-	-	-	-	-	-	-	-	-	-	-	-	-	-	-	-	-	-	-	-	-	-	-	-	-	-	-
AX-147231307	Aradu.A08	40886460	Sten1	-	-	-	-	-	-	-	-	-	-	-	-	-	-	-	-	-	-	-	-	-	-	-	-	-	-	-	-	-	-	-	-	-	-	-	-	-	-	-	-	-	-	-	-	-	-
AX-147258971	Aradu.A08	41498901	Sten1	-	-	-	-	-	-	-	-	-	-	-	-	-	-	-	-	-	-	-	-	-	-	-	-	-	-	-	-	-	-	-	-	-	-	-	-	-	-	-	-	-	-	-	-	-	-
AX-147231410	Aradu.A08	42383674	Sten1	-	-	-	-	-	-	-	-	-	-	-	-	-	-	-	-	-	-	-	-	-	-	-	-	-	-	-	-	-	-	-	-	-	-	-	-	-	-	-	-	-	-	-	-	-	-
AX-147231500	Aradu.A08	43354782	Sten1	-	-	-	-	-	-	-	-	-	-	-	-	-	-	-	-	-	-	-	-	-	-	-	-	-	-	-	-	-	-	-	-	-	-	-	-	-	-	-	-	-	-	-	-	-	-
AX-176817973	Aradu.A08	43472087	Sten2	-	Sten2	-	-	-	Sten2	Sten2	Sten1	Sten1	Sten1	-	Sten2	Sten1	-	-	-	Sten1	Sten2	Sten2	Sten1	Sten1	Sten1	Sten1	Sten2	Sten1	Sten2	-	Sten2	-	-	-	-	-	-	-	Sten1	Sten1	-	Sten2	Sten2	Sten2	Sten1	Sten1	Sten1	-	Sten1
AX-147231647	Aradu.A08	44987016	Sten1	-	-	-	-	-	-	-	-	-	-	-	-	-	-	-	-	-	-	-	-	-	-	-	-	-	-	-	-	-	-	-	-	-	-	-	-	-	-	-	-	-	-	-	-	-	-
AX-147231716	Aradu.A08	45750189	Sten1	-	-	-	-	-	-	-	-	-	-	-	-	-	-	-	-	-	-	-	-	-	-	-	-	-	-	-	-	-	-	-	-	-	-	-	-	-	-	-	-	-	-	-	-	-	-
AX-147231809	Aradu.A08	46433006	Sten1	-	-	-	-	-	-	-	-	-	-	-	-	-	-	-	-	-	-	-	-	-	-	-	-	-	-	-	-	-	-	-	-	-	-	-	-	-	-	-	-	-	-	-	-	-	-
AX-176809498	Aradu.A08	47378713	Sten1	-	-	-	-	-	-	-	-	-	-	-	-	-	-	-	-	-	-	-	-	-	-	-	-	-	-	-	-	-	-	-	-	-	-	-	-	-	-	-	-	-	-	-	-	-	-
AX-147231933	Aradu.A08	48256544	Sten1	-	-	-	-	-	-	-	-	-	-	-	-	-	-	-	-	-	-	-	-	-	-	-	-	-	-	-	-	-	-	-	-	-	-	-	-	-	-	-	-	-	-	-	-	-	-
AX-147232070	Aradu.A09	367305	Sten1	-	-	-	-	-	-	-	-	-	-	-	-	-	-	-	-	-	-	-	-	-	-	-	-	-	-	-	-	-	-	-	-	-	-	-	-	-	-	-	-	-	-	-	-	-	-
AX-147232078	Aradu.A09	550898	Sten1	-	-	-	-	-	-	-	-	-	-	-	-	-	-	-	-	-	-	-	-	-	-	-	-	-	-	-	-	-	-	-	-	-	-	-	-	-	-	-	-	-	-	-	-	-	-
AX-177640681	Aradu.A09	1992408	Sten1	-	-	-	-	-	-	-	-	-	-	-	-	-	-	-	-	-	-	-	-	-	Sten1	-	-	-	-	-	-	-	-	-	-	-	-	-	-	-	-	-	-	-	-	-	-	-	-
AX-176820764	Aradu.A09	2216924	-	-	-	-	-	-	-	-	-	-	-	-	-	-	-	-	-	-	-	-	-	-	-	-	-	-	-	-	-	-	-	-	-	-	-	-	-	-	-	-	-	-	-	-	-	-	-
AX-147232337	Aradu.A09	3427133	Sten1	-	-	-	-	-	-	-	-	-	-	-	-	-	-	-	-	-	-	-	-	-	-	-	-	-	-	-	-	-	-	-	-	-	-	-	-	-	-	-	-	-	-	-	-	-	-
AX-147232431	Aradu.A09	4656815	Sten1	-	-	-	-	-	-	-	-	-	-	-	-	-	-	-	-	-	-	-	-	-	-	-	-	-	-	-	-	-	-	-	-	-	-	-	-	-	-	-	-	-	-	-	-	-	-
AX-177642915	Aradu.A09	5066191	Sten1	-	-	-	-	-	-	-	-	-	-	-	-	-	-	-	-	-	-	-	-	-	-	-	-	-	-	-	-	-	-	-	-	-	-	-	-	-	-	-	-	-	-	-	-	-	-
AX-147232553	Aradu.A09	6846409	-	-	-	-	-	-	-	-	-	-	-	-	-	-	-	-	-	-	-	-	-	-	-	-	-	-	-	-	-	-	-	-	-	-	-	-	-	-	-	-	-	-	-	-	-	-	-
AX-147232596	Aradu.A09	7750844	Sten1	-	-	-	-	-	-	-	-	-	-	-	-	-	-	-	-	-	-	-	-	-	-	-	-	-	-	-	-	-	-	-	-	-	-	-	-	-	-	-	-	-	-	-	-	-	-
AX-147232597	Aradu.A09	7755946	Sten1	-	-	-	-	-	-	-	-	-	-	-	-	-	-	-	-	-	-	-	-	-	-	-	-	-	-	-	-	-	-	-	-	-	-	-	-	-	-	-	-	-	-	-	-	-	-
AX-147260196	Aradu.A09	8267184	-	-	-	Sten1	-	Sten1	-	Sten1	-	-	-	Sten1	-	Sten1	-	Sten1	-	-	-	-	-	-	-	-	-	-	-	-	-	-	-	-	-	-	-	-	-	-	-	Sten1	-	Sten1	-	Sten1	-	Sten1	-
AX-147232661	Aradu.A09	8661916	-	-	-	Sten1	-	Sten1	-	-	-	-	-	Sten1	-	Sten1	-	-	-	-	-	-	-	-	-	-	-	-	-	-	-	-	-	-	-	-	-	-	-	-	-	Sten1	-	Sten1	-	Sten1	-	Sten1	-
AX-147232700	Aradu.A09	9827232	Sten1	-	-	-	-	-	-	-	-	-	-	-	-	-	-	-	-	-	-	-	-	-	-	-	-	-	-	-	-	-	-	-	-	-	-	-	-	-	-	-	-	-	-	-	-	-	-
AX-176800012	Aradu.A09	11803325	Sten1	-	-	-	-	-	-	-	-	-	-	-	-	-	-	-	-	-	-	-	-	-	-	-	-	-	-	-	-	-	-	-	-	-	-	-	-	-	-	-	-	-	-	-	-	-	-
AX-176791761	Aradu.A09	12546411	Sten1	-	-	-	-	-	-	-	-	-	-	-	-	-	-	-	-	-	-	-	-	-	-	-	-	-	-	-	-	-	-	-	-	-	-	-	-	-	-	-	-	-	-	-	-	-	-
AX-147232832	Aradu.A09	13120048	Sten1	-	-	-	-	-	-	-	-	-	-	-	-	-	-	-	-	-	-	-	-	-	-	-	-	-	-	-	-	-	-	-	-	-	-	-	-	-	-	-	-	-	-	-	-	-	-
AX-147260629	Aradu.A09	14150363	Sten2	-	-	-	-	-	-	-	-	-	-	-	-	-	-	-	-	-	-	Sten1	-	Sten1	-	Sten1	-	Sten1	-	Sten2	-	Sten1	-	Sten1	-	Sten1	-	Sten1	-	Sten2	Sten1	-	-	-	-	-	-	-	-
AX-147232906	Aradu.A09	14385410	Sten1	-	-	-	-	-	-	-	-	-	-	-	-	-	-	-	-	-	-	-	-	-	-	-	-	-	-	-	-	-	-	-	-	-	-	-	-	-	-	-	-	-	-	-	-	-	-
AX-147232927	Aradu.A09	15225814	Sten1	-	-	-	-	-	-	-	-	-	-	-	-	-	-	-	-	-	-	-	-	-	-	-	-	-	-	-	-	-	-	-	-	-	-	-	-	-	-	-	-	-	-	-	-	-	-
AX-177644072	Aradu.A09	15594442	Sten1	-	-	-	-	-	-	-	-	-	-	-	-	-	-	-	-	-	-	-	-	-	-	-	-	-	-	-	-	-	-	-	-	-	-	-	-	-	-	-	-	-	-	-	-	-	-
AX-147232963	Aradu.A09	16516448	Sten1	-	-	-	-	-	-	-	-	-	-	-	-	-	-	-	-	-	-	-	-	-	-	-	-	-	-	-	-	-	-	-	-	-	-	-	-	-	-	-	-	-	-	-	-	-	-
AX-147232968	Aradu.A09	16570254	Sten1	-	-	-	-	-	-	-	-	-	-	-	-	-	-	-	-	-	-	-	-	-	-	-	-	-	-	-	-	-	-	-	-	-	-	-	-	-	-	-	-	-	-	-	-	-	-
AX-147232981	Aradu.A09	17033486	Sten1	-	-	-	-	-	-	-	-	-	-	-	-	-	-	-	-	-	-	-	-	-	-	-	-	-	-	-	-	-	-	-	-	-	-	-	-	-	-	-	-	-	-	-	-	-	-
AX-147233079	Aradu.A09	20412728	Sten1	-	-	-	-	-	-	-	-	-	-	-	-	-	-	-	-	-	-	-	-	-	-	-	-	-	-	-	-	-	-	-	-	-	-	-	-	-	-	-	-	-	-	-	-	-	-
AX-147233080	Aradu.A09	20416585	Sten1	-	-	-	-	-	-	-	-	-	-	-	-	-	-	-	-	-	-	-	-	-	-	-	-	-	-	-	-	-	-	-	-	-	-	-	-	-	-	-	-	-	-	-	-	-	-
AX-176797333	Aradu.A09	20677308	-	-	-	-	-	-	-	-	-	-	-	-	-	-	-	-	-	-	-	-	-	-	-	-	-	-	-	-	-	-	-	-	-	-	-	-	-	-	-	-	-	-	-	-	-	-	-
AX-177639089	Aradu.A09	22108990	-	-	-	-	-	-	-	-	-	-	-	-	-	-	-	-	-	-	-	-	-	-	-	-	-	-	-	-	-	-	-	-	-	-	-	-	-	-	-	-	-	-	-	-	-	-	-
AX-177640322	Aradu.A09	28144250	-	-	-	-	-	-	-	-	-	-	-	-	-	-	-	-	-	-	-	-	-	-	-	-	-	-	-	-	-	-	-	-	-	-	-	-	-	-	-	-	-	-	-	-	-	-	-
AX-147233233	Aradu.A09	30827063	Sten1	-	-	-	-	-	-	-	-	-	-	-	-	-	-	-	-	-	-	-	-	-	-	-	-	-	-	-	-	-	-	-	-	-	-	-	-	-	-	-	-	-	-	-	-	-	-
AX-176793778	Aradu.A09	32582881	-	-	-	-	-	-	-	-	-	-	-	-	-	-	-	-	-	-	-	-	-	-	-	-	-	-	-	-	-	-	-	-	-	-	-	-	-	-	-	-	-	-	-	-	-	-	-
AX-147233267	Aradu.A09	35915325	Sten1	-	-	-	-	-	-	-	-	-	-	-	-	-	-	-	-	-	-	-	-	-	-	-	-	-	-	-	-	-	-	-	-	-	-	-	-	-	-	-	-	-	-	-	-	-	-
AX-176821816	Aradu.A09	45820821	-	-	-	-	-	-	-	-	-	-	-	-	-	-	-	-	-	-	-	-	-	-	-	-	-	-	-	-	-	-	-	-	-	-	-	-	-	-	-	-	-	-	-	-	-	-	-
AX-177643223	Aradu.A09	46721425	Sten1	-	-	-	-	-	-	-	-	-	-	-	-	-	-	-	-	-	-	-	-	-	Sten1	-	-	-	-	-	-	-	-	-	-	-	-	-	-	-	-	-	-	-	-	-	-	-	-
AX-147261120	Aradu.A09	47363859	Sten1	-	-	-	-	-	-	-	-	-	-	-	-	-	-	-	-	-	-	-	-	-	-	-	-	-	-	-	-	-	-	-	-	-	-	-	-	-	-	-	-	-	-	-	-	-	-
AX-177638489	Aradu.A09	48224918	Sten1	-	-	-	-	-	-	-	-	-	-	-	-	-	-	-	-	-	-	-	-	-	-	-	-	-	-	-	-	-	-	-	-	-	-	-	-	-	-	-	-	-	-	-	-	-	-
AX-177637986	Aradu.A09	53409504	-	-	-	-	-	-	-	-	-	-	-	-	-	-	-	-	-	-	-	-	-	-	-	-	-	-	-	-	-	-	-	-	-	-	-	-	-	-	-	-	-	-	-	-	-	-	-
AX-177638407	Aradu.A09	73198747	Sten1	-	-	-	-	-	-	-	-	-	-	-	-	-	-	-	-	-	-	-	-	-	-	-	-	-	-	-	-	-	-	-	-	-	-	-	-	-	-	-	-	-	-	-	-	-	-
AX-147233498	Aradu.A09	74776697	Sten1	-	-	-	-	-	-	-	-	-	-	-	-	-	-	-	-	-	-	-	-	-	-	-	-	-	-	-	-	-	-	-	-	-	-	-	-	-	-	-	-	-	-	-	-	-	-
AX-176803366	Aradu.A09	80240197	Sten1	-	-	-	-	-	-	-	-	-	-	-	-	-	-	-	-	-	-	-	-	-	-	-	-	-	-	-	-	-	-	-	-	-	-	-	-	-	-	-	-	-	-	-	-	-	-
AX-147233554	Aradu.A09	82366437	Sten1	-	-	-	-	-	-	-	-	-	-	-	-	-	-	-	-	-	-	-	-	-	-	-	-	-	-	-	-	-	-	-	-	-	-	-	-	-	-	-	-	-	-	-	-	-	-
AX-176809099	Aradu.A09	91548071	Sten1	-	-	-	-	-	-	-	-	-	-	-	-	-	-	-	-	-	-	-	-	-	-	-	-	-	-	-	-	-	-	-	-	-	-	-	-	-	-	-	-	-	-	-	-	-	-
AX-177639401	Aradu.A09	93135689	Sten1	-	-	-	-	-	-	-	-	-	-	-	-	-	-	-	-	-	-	-	-	-	-	-	-	-	-	-	-	-	-	-	-	-	-	-	-	-	-	-	-	-	-	-	-	-	-
AX-147233670	Aradu.A09	94328792	Sten1	-	-	-	-	-	-	-	-	-	-	-	-	-	-	-	-	-	-	-	-	-	-	-	-	-	-	-	-	-	-	-	-	-	-	-	-	-	-	-	-	-	-	-	-	-	-
AX-176822101	Aradu.A09	97879279	Sten1	-	-	-	-	-	-	-	-	-	-	-	-	-	-	-	-	-	-	-	-	-	-	-	-	-	-	-	-	-	-	-	-	-	-	-	-	-	-	-	-	-	-	-	-	-	-
AX-147233736	Aradu.A09	100203544	Sten1	-	-	-	-	-	-	-	-	-	-	-	-	-	-	-	-	-	-	-	-	-	-	-	-	-	-	-	-	-	-	-	-	-	-	-	-	-	-	-	-	-	-	-	-	-	-
AX-147233752	Aradu.A09	100681800	Sten2	-	-	-	-	-	-	-	-	-	-	-	-	-	-	-	-	-	-	-	-	-	-	-	-	-	-	-	-	-	-	-	-	-	-	-	-	-	-	-	-	-	-	-	-	-	-
AX-177637511	Aradu.A09	104608380	-	-	-	-	-	-	-	-	-	-	-	-	-	-	-	-	-	-	-	-	-	-	-	-	-	-	-	-	-	-	-	-	-	-	-	-	-	-	-	-	-	-	-	-	-	-	-
AX-147233881	Aradu.A09	104624029	Sten1	-	-	-	-	-	-	-	-	-	-	-	-	-	-	-	-	-	-	-	-	-	-	-	-	-	-	-	-	-	-	-	-	-	-	-	-	-	-	-	-	-	-	-	-	-	-
AX-177640140	Aradu.A09	106100105	Sten1	-	-	-	-	-	-	-	-	-	-	-	-	-	-	-	-	-	-	-	-	-	-	Sten1	-	-	-	-	-	-	-	-	-	-	-	-	-	-	-	-	-	-	-	-	-	-	-
AX-147233961	Aradu.A09	108869870	-	-	-	-	-	-	-	-	-	-	-	-	-	-	-	-	-	-	-	-	-	-	-	-	-	-	-	-	-	-	-	-	-	-	-	-	-	-	-	-	-	-	-	-	-	-	-
AX-147233963	Aradu.A09	108905759	Sten1	-	-	-	-	-	-	-	-	-	-	-	-	-	-	-	-	-	-	-	-	-	-	-	-	-	-	-	-	-	-	-	-	-	-	-	-	-	-	-	-	-	-	-	-	-	-
AX-147233992	Aradu.A09	109699138	Sten1	-	-	-	-	-	-	-	-	-	-	-	-	-	-	-	-	-	-	-	-	-	-	-	-	-	-	-	-	-	-	-	-	-	-	-	-	-	-	-	-	-	-	-	-	-	-
AX-147234017	Aradu.A09	109977568	Sten1	-	-	-	-	-	-	-	-	-	-	-	-	-	-	-	-	-	-	-	-	-	-	-	-	-	-	-	-	-	-	-	-	-	-	-	-	-	-	-	-	-	-	-	-	-	-
AX-147234159	Aradu.A09	111972500	Sten1	-	-	-	-	-	-	-	-	-	-	-	-	-	-	-	-	-	-	-	-	-	-	-	-	-	-	-	-	-	-	-	-	-	-	-	-	-	-	-	-	-	-	-	-	-	-
AX-147234195	Aradu.A09	112245541	Sten1	-	-	-	-	-	-	-	-	-	-	-	-	-	-	-	-	-	-	-	-	-	-	-	-	-	-	-	-	-	-	-	-	-	-	-	-	-	-	-	-	-	-	-	-	-	-
AX-176821396	Aradu.A09	112528532	Sten1	-	-	-	-	-	-	-	-	-	-	-	-	-	-	-	-	-	-	-	-	-	-	-	-	-	-	-	-	-	-	-	-	-	-	-	-	-	-	-	-	-	-	-	-	-	-
AX-147262369	Aradu.A09	113662882	Sten1	-	-	-	-	-	-	-	-	-	-	-	-	-	-	-	-	-	-	-	-	-	-	-	-	-	-	-	-	-	-	-	-	-	-	-	-	-	-	-	-	-	-	-	-	-	-
AX-176822907	Aradu.A09	113714863	-	-	-	-	-	-	-	-	-	-	-	-	-	-	-	-	-	-	-	-	-	-	-	-	-	-	-	-	-	-	-	-	-	-	-	-	-	-	-	-	-	-	-	-	-	-	-
AX-147234336	Aradu.A09	113715433	Sten2	-	-	-	-	-	-	-	-	-	-	-	-	-	-	-	-	-	-	-	-	-	-	-	-	-	-	-	-	-	-	-	-	-	-	-	-	-	-	-	-	-	-	-	-	-	-
AX-147234385	Aradu.A09	114515959	Sten2	-	-	-	-	-	-	-	-	-	-	-	-	-	-	-	-	-	-	-	-	-	-	-	-	-	-	-	-	-	-	-	-	-	-	-	-	-	-	-	-	-	-	-	-	-	-
AX-147234444	Aradu.A09	115268602	Sten1	-	-	-	-	-	-	-	-	-	-	-	-	-	-	-	-	-	-	-	-	-	-	-	-	-	-	-	-	-	-	-	-	-	-	-	-	-	-	-	-	-	-	-	-	-	-
AX-176820496	Aradu.A09	115524842	-	-	-	-	-	-	-	-	-	-	-	-	-	-	-	-	-	-	-	-	-	-	-	-	-	-	-	-	-	-	-	-	-	-	-	-	-	-	-	-	-	-	-	-	-	-	-
AX-147234542	Aradu.A09	116087388	-	-	-	-	-	-	-	-	-	-	-	-	-	-	-	-	-	-	-	-	-	-	-	-	-	-	-	-	-	-	-	-	-	-	-	-	-	-	-	-	-	-	-	-	-	-	-
AX-147262112	Aradu.A09	116264687	Sten2	-	-	-	-	-	-	-	-	-	-	-	-	-	-	-	-	-	-	-	-	-	-	-	-	-	-	-	-	-	-	-	-	-	-	-	-	-	-	-	-	-	-	-	-	-	-
AX-147234599	Aradu.A09	116627090	-	-	-	-	-	-	-	-	-	-	-	-	-	-	-	-	-	-	-	-	-	-	-	-	-	-	-	-	-	-	-	-	-	-	-	-	-	-	-	-	-	-	-	-	-	-	-
AX-176792163	Aradu.A09	116748829	Sten1	-	-	-	-	-	-	-	-	-	-	-	-	-	-	-	-	-	-	-	-	-	-	-	-	-	-	-	-	-	-	-	-	-	-	-	-	-	-	-	-	-	-	-	-	-	-
AX-147234740	Aradu.A09	118577665	Sten2	-	-	-	-	-	-	-	-	-	-	-	-	-	-	-	-	-	-	-	-	-	-	-	-	-	-	-	-	-	-	-	-	-	-	-	-	-	-	-	-	-	-	-	-	-	-
AX-147234752	Aradu.A09	118682014	Sten1	-	-	-	-	-	-	-	-	-	-	-	-	-	-	-	-	-	-	-	-	-	-	-	-	-	-	-	-	-	-	-	-	-	-	-	-	-	-	-	-	-	-	-	-	-	-
AX-176821497	Aradu.A09	120424102	Sten1	-	-	-	-	-	-	-	-	-	-	-	-	-	-	-	-	-	-	-	-	-	-	-	-	-	-	-	-	-	-	-	-	-	-	-	-	-	-	-	-	-	-	-	-	-	-
AX-147234866	Aradu.A10	373630	Sten2	-	-	-	-	-	-	-	-	-	-	-	-	-	-	-	-	-	-	-	-	-	-	-	-	-	-	-	-	-	-	-	-	-	-	-	-	-	-	-	-	-	-	-	-	-	Sten1
AX-176791779	Aradu.A10	694007	Sten1	-	-	-	-	-	-	-	-	-	-	-	-	-	-	-	-	-	-	-	-	-	-	-	-	-	-	-	-	-	-	-	-	-	-	-	-	-	-	-	-	-	-	-	-	-	-
AX-177644206	Aradu.A10	980256	Sten1	-	-	-	-	-	-	-	-	-	-	-	-	-	-	-	-	-	-	-	-	-	-	-	-	-	-	-	-	-	-	-	-	-	-	-	-	-	-	-	-	-	-	-	-	-	-
AX-147234950	Aradu.A10	1835586	Sten1	-	-	-	-	-	-	-	-	-	-	-	-	-	-	-	-	-	-	-	-	-	-	-	-	-	-	-	-	-	-	-	-	-	-	-	-	-	-	-	-	-	-	-	-	-	-
AX-147234996	Aradu.A10	2323344	Sten1	-	-	-	-	-	-	-	-	-	-	-	-	-	-	-	-	-	-	-	-	-	-	-	-	-	-	-	-	-	-	-	-	-	-	-	-	-	-	-	-	-	-	-	-	-	-
AX-177644136	Aradu.A10	2422728	Sten1	-	-	-	-	-	-	-	-	-	-	-	-	-	-	-	-	-	-	-	-	-	-	-	-	-	-	-	-	-	-	-	-	-	-	-	-	-	-	-	-	-	-	-	-	-	-
AX-147235020	Aradu.A10	2717231	Sten1	-	-	-	-	-	-	-	-	-	-	-	-	-	-	-	-	-	-	-	-	-	-	-	-	-	-	-	-	-	-	-	-	-	-	-	-	-	-	-	-	-	-	-	-	-	-
AX-147235037	Aradu.A10	2883328	Sten1	-	-	-	-	-	-	-	-	-	-	-	-	-	-	-	-	-	-	-	-	-	-	-	-	-	-	-	-	-	-	-	-	-	-	-	-	-	-	-	-	-	-	-	-	-	-
AX-176791912	Aradu.A10	3689273	Sten1	-	-	-	-	-	-	-	-	-	-	-	-	-	-	-	-	-	-	-	-	-	-	-	-	-	-	-	-	-	-	-	-	-	-	-	-	-	-	-	-	-	-	-	-	-	-
AX-147235165	Aradu.A10	4293421	Sten1	-	-	-	-	-	-	-	-	-	-	-	-	-	-	-	-	-	-	-	-	-	-	-	-	-	-	-	-	-	-	-	-	-	-	-	-	-	-	-	-	-	-	-	-	-	-
AX-147235204	Aradu.A10	4951877	Sten1	-	-	-	-	-	-	-	-	-	-	-	-	-	-	-	-	-	-	-	-	-	-	-	-	-	-	-	-	-	-	-	-	-	-	-	-	-	-	-	-	-	-	-	-	-	-
AX-147235265	Aradu.A10	5737111	-	-	-	-	-	-	-	-	-	-	-	-	-	-	-	-	-	-	-	-	-	-	-	-	-	-	-	-	-	-	-	-	-	-	-	-	-	-	-	-	-	-	-	-	-	-	-
AX-147235270	Aradu.A10	5811384	Sten1	-	-	-	-	-	-	-	-	-	-	-	-	-	-	-	-	-	-	-	-	-	-	-	-	-	-	-	-	-	-	-	-	-	-	-	-	-	-	-	-	-	-	-	-	-	-
AX-147235274	Aradu.A10	5845928	Sten1	-	-	-	-	-	-	-	-	-	-	-	-	-	-	-	-	-	-	-	-	-	-	-	-	-	-	-	-	-	-	-	-	-	-	-	-	-	-	-	-	-	-	-	-	-	-
AX-147235285	Aradu.A10	5963482	Sten1	-	-	-	-	-	-	-	-	-	-	-	-	-	-	-	-	-	-	-	-	-	-	-	-	-	-	-	-	-	-	-	-	-	-	-	-	-	-	-	-	-	-	-	-	-	-
AX-147235299	Aradu.A10	6103331	Sten1	-	-	-	-	-	-	-	-	-	-	-	-	-	-	-	-	-	-	-	-	-	-	-	-	-	-	-	-	-	-	-	-	-	-	-	-	-	-	-	-	-	-	-	-	-	-
AX-147235343	Aradu.A10	6584647	Sten1	-	-	-	-	-	-	-	-	-	-	-	-	-	-	-	-	-	-	-	-	-	-	-	-	-	-	-	-	-	-	-	-	-	-	-	-	-	-	-	-	-	-	-	-	-	-
AX-147235363	Aradu.A10	6782100	Sten1	-	-	-	-	-	-	-	-	-	-	-	-	-	-	-	-	-	-	-	-	-	-	-	-	-	-	-	-	-	-	-	-	-	-	-	-	-	-	-	-	-	-	-	-	-	-
AX-147235364	Aradu.A10	6784617	Sten1	-	-	-	-	-	-	-	-	-	-	-	-	-	-	-	-	-	-	-	-	-	-	-	-	-	-	-	-	-	-	-	-	-	-	-	-	-	-	-	-	-	-	-	-	-	-
AX-176820766	Aradu.A10	7984682	-	-	Sten1	Sten1	-	Sten1	Sten1	Sten2	-	Sten2	-	Sten1	Sten1	Sten2	Sten1	Sten2	-	Sten1	Sten1	Sten1	Sten1	Sten1	Sten1	Sten2	Sten1	Sten2	Sten1	Sten1	Sten1	Sten1	Sten1	Sten1	-	Sten1	Sten1	Sten2	Sten1	Sten2	Sten2	Sten1	Sten2	Sten1	-	Sten1	Sten2	Sten1	Sten1
AX-176812184	Aradu.A10	10447114	-	-	-	-	-	-	-	-	-	-	-	-	-	-	-	-	-	-	-	-	-	-	-	-	-	-	-	-	-	-	-	-	-	-	-	-	-	-	-	-	-	-	-	-	-	-	-
AX-147235513	Aradu.A10	10641881	Sten1	-	-	-	-	-	-	-	-	-	-	-	-	-	-	-	-	-	-	-	-	-	-	-	-	-	-	-	-	-	-	-	-	-	-	-	-	-	-	-	-	-	-	-	-	-	-
AX-176807391	Aradu.A10	12933320	-	-	-	-	-	-	-	-	-	-	-	-	-	-	-	-	-	-	-	-	-	-	-	-	-	-	-	-	-	-	-	-	-	-	-	-	-	-	-	-	-	-	-	-	-	-	-
AX-177643715	Aradu.A10	14089200	-	-	-	-	-	-	-	-	-	-	-	-	-	-	-	-	-	-	-	-	-	-	-	-	-	-	-	-	-	-	-	-	-	-	-	-	-	-	-	-	-	-	-	-	-	-	-
AX-176796506	Aradu.A10	18066033	Sten2	-	-	-	-	-	-	-	Sten1	-	Sten1	-	Sten1	-	Sten2	-	-	-	-	-	-	-	-	-	-	-	-	-	-	-	-	-	-	-	-	-	-	-	Sten1	-	-	-	Sten2	-	-	-	-
AX-147235670	Aradu.A10	20471486	Sten1	-	-	-	-	-	-	-	-	-	-	-	-	-	-	-	-	-	-	-	-	-	-	-	-	-	-	-	-	-	-	-	-	-	-	-	-	-	-	-	-	-	-	-	-	-	-
AX-176820028	Aradu.A10	21109953	-	-	-	-	-	-	-	-	-	-	-	-	-	-	-	-	-	-	-	-	-	-	Sten1	-	-	-	-	-	-	-	-	-	-	-	-	-	-	-	-	-	-	-	-	-	-	-	-
AX-176811229	Aradu.A10	22008568	Sten2	-	-	-	-	-	-	-	-	-	-	-	-	-	-	-	-	-	-	-	-	-	-	-	-	-	-	-	-	-	-	-	-	-	-	-	-	-	-	-	-	-	-	-	-	-	-
AX-177642558	Aradu.A10	23775310	Sten1	-	-	-	-	-	-	-	-	-	-	-	-	-	-	-	-	-	-	-	-	-	-	-	-	-	-	-	-	-	-	-	-	-	-	-	-	-	-	-	-	-	-	-	-	-	-
AX-147235779	Aradu.A10	30388204	Sten1	-	-	-	-	-	-	-	-	-	-	-	-	-	-	-	-	-	-	-	-	-	-	-	-	-	-	-	-	-	-	-	-	-	-	-	-	-	-	-	-	-	-	-	-	-	-
AX-176799418	Aradu.A10	32581656	-	-	-	-	-	-	-	-	-	-	-	-	-	-	-	-	-	-	-	-	-	-	-	-	-	-	-	-	-	-	-	-	-	-	-	-	-	-	-	-	-	-	-	-	-	-	-
AX-147235833	Aradu.A10	34514348	Sten1	-	-	-	-	-	-	-	-	-	-	-	-	-	-	-	-	-	-	-	-	-	-	-	-	-	-	-	-	-	-	-	-	-	-	-	-	-	-	-	-	-	-	-	-	-	-
AX-177638189	Aradu.A10	41521076	-	-	-	-	-	-	-	-	-	-	-	-	-	-	-	-	-	-	-	-	-	-	-	-	-	-	-	-	-	-	-	-	-	-	-	-	-	-	-	-	-	-	-	-	-	-	-
AX-147235884	Aradu.A10	43890839	Sten1	-	-	-	-	-	-	-	-	-	-	-	-	-	-	-	-	-	-	-	-	-	-	-	-	-	-	-	-	-	-	-	-	-	-	-	-	-	-	-	-	-	-	-	-	-	-
AX-176819152	Aradu.A10	46982226	Sten1	-	-	-	-	-	-	-	-	-	-	-	-	-	-	-	-	-	-	-	-	-	Sten1	-	-	-	-	-	-	-	-	-	-	-	-	-	-	-	-	-	-	-	-	-	-	-	-
AX-147235920	Aradu.A10	49445399	-	-	-	-	-	-	-	-	-	-	-	-	-	-	-	-	-	-	-	-	-	-	-	-	-	-	-	-	-	-	-	-	-	-	-	-	-	-	-	-	-	-	-	-	-	-	-
AX-176796195	Aradu.A10	53546174	Sten1	-	-	-	-	-	-	-	-	-	-	-	-	-	-	-	-	-	-	-	-	-	-	-	-	-	-	-	-	-	-	-	-	-	-	-	-	-	-	-	-	-	-	-	-	-	-
AX-147241244	Aradu.A10	57142266	Sten2	-	-	-	-	-	-	-	Sten1	-	Sten1	-	Sten1	-	Sten2	-	-	-	-	-	-	-	-	-	-	-	-	-	-	-	-	-	-	-	-	-	-	-	-	-	-	-	Sten2	-	-	-	-
AX-147235962	Aradu.A10	57722566	-	-	-	-	-	-	-	-	-	-	-	-	-	-	-	-	-	-	-	-	-	-	-	-	-	-	-	-	-	-	-	-	-	-	-	-	-	-	-	-	-	-	-	-	-	-	-
AX-147235972	Aradu.A10	58678659	Sten1	-	-	-	-	-	-	-	-	-	-	-	-	-	-	-	-	-	-	-	-	-	-	-	-	-	-	-	-	-	-	-	-	-	-	-	-	-	-	-	-	-	-	-	-	-	-
AX-147235983	Aradu.A10	62593623	Sten1	-	-	-	-	-	-	-	-	-	-	-	-	-	-	-	-	-	-	-	-	-	-	-	-	-	-	-	-	-	-	-	-	-	-	-	-	-	-	-	-	-	-	-	-	-	-
AX-177640593	Aradu.A10	64894125	-	-	-	-	-	-	-	-	-	-	-	-	-	-	-	-	-	-	-	-	-	-	-	-	-	-	-	-	-	-	-	-	-	-	-	-	-	-	-	-	-	-	-	-	-	-	-
AX-147236045	Aradu.A10	67383026	Sten1	-	-	-	-	-	-	-	-	-	-	-	-	-	-	-	-	-	-	-	-	-	-	-	-	-	-	-	-	-	-	-	-	-	-	-	-	-	-	-	-	-	-	-	-	-	-
AX-147236050	Aradu.A10	67722120	Sten1	-	-	-	-	-	-	-	-	-	-	-	-	-	-	-	-	-	-	-	-	-	-	-	-	-	-	-	-	-	-	-	-	-	-	-	-	-	-	-	-	-	-	-	-	-	-
AX-176816625	Aradu.A10	68628266	-	-	-	-	-	-	-	-	-	-	-	-	-	-	-	-	-	-	-	-	-	-	-	-	-	-	-	-	-	-	-	-	-	-	-	-	-	-	-	-	-	-	-	-	-	-	-
AX-177641655	Aradu.A10	70934631	Sten1	-	-	-	-	-	-	-	-	-	-	-	-	-	-	-	-	-	-	-	-	-	-	-	-	-	-	-	-	-	-	-	-	-	-	-	-	-	-	-	-	-	-	-	-	-	-
AX-177641335	Aradu.A10	71034744	-	-	-	-	-	-	-	-	-	-	-	-	-	-	-	-	-	-	-	-	-	-	-	-	-	-	-	-	-	-	-	-	-	-	-	-	-	-	-	-	-	-	-	-	-	-	-
AX-176823578	Aradu.A10	75427804	-	-	-	-	-	-	-	-	-	-	-	-	-	-	-	-	-	-	-	-	-	-	-	-	-	-	-	-	-	-	-	-	-	-	-	-	-	-	-	-	-	-	-	-	-	-	-
AX-147236198	Aradu.A10	83313579	Sten1	-	-	-	-	-	-	-	-	-	-	-	-	-	-	-	-	-	-	-	-	-	-	-	-	-	-	-	-	-	-	-	-	-	-	-	-	-	-	-	-	-	-	-	-	-	-
AX-147236222	Aradu.A10	84012900	Sten1	-	-	-	-	-	-	-	-	-	-	-	-	-	-	-	-	-	-	-	-	-	-	-	-	-	-	-	-	-	-	-	-	-	-	-	-	-	-	-	-	-	-	-	-	-	-
AX-147236225	Aradu.A10	84240906	Sten1	-	-	-	-	-	-	-	-	-	-	-	-	-	-	-	-	-	-	-	-	-	-	-	-	-	-	-	-	-	-	-	-	-	-	-	-	-	-	-	-	-	-	-	-	-	-
AX-177641665	Aradu.A10	85184155	-	-	-	-	-	-	-	-	-	-	-	-	-	-	-	-	-	-	-	-	-	-	-	-	-	-	-	-	-	-	-	-	-	-	-	-	-	-	-	-	-	-	-	-	-	-	-
AX-147236244	Aradu.A10	85297113	Sten1	-	-	-	-	-	-	-	-	-	-	-	-	-	-	-	-	-	-	-	-	-	-	-	-	-	-	-	-	-	-	-	-	-	-	-	-	-	-	-	-	-	-	-	-	-	-
AX-147236270	Aradu.A10	87705205	Sten1	-	-	-	-	-	-	-	-	-	-	-	-	-	-	-	-	-	-	-	-	-	-	-	-	-	-	-	-	-	-	-	-	-	-	-	-	-	-	-	-	-	-	-	-	-	-
AX-177640443	Aradu.A10	87711827	Sten1	-	-	-	-	-	-	-	-	-	-	-	-	-	-	-	-	-	-	-	-	-	-	-	-	-	-	-	-	-	-	-	-	-	-	-	-	-	-	-	-	-	-	-	-	-	-
AX-176822079	Aradu.A10	87776126	-	-	-	-	-	-	-	-	-	-	-	-	-	-	-	-	-	-	-	-	-	-	-	-	-	-	-	-	-	-	-	-	-	-	-	-	-	-	-	-	-	-	-	-	-	-	-
AX-147236291	Aradu.A10	88475620	Sten1	-	-	-	-	-	-	-	-	-	-	-	-	-	-	-	-	-	-	-	-	-	-	-	-	-	-	-	-	-	-	-	-	-	-	-	-	-	-	-	-	-	-	-	-	-	-
AX-176823524	Aradu.A10	89326285	-	-	-	-	-	-	-	-	-	-	-	-	-	-	-	-	-	-	-	-	-	-	-	-	-	-	-	-	-	-	-	-	-	-	-	-	-	-	-	-	-	-	-	-	-	-	-
AX-177638956	Aradu.A10	90440162	-	-	-	-	-	-	-	-	-	-	-	-	-	-	-	-	-	-	-	-	-	-	-	-	-	-	-	-	-	-	-	-	-	-	-	-	-	-	-	-	-	-	-	-	-	-	-
AX-147236380	Aradu.A10	92558727	Sten1	-	-	-	-	-	-	-	-	-	-	-	-	-	-	-	-	-	-	-	-	-	-	-	-	-	-	-	-	-	-	-	-	-	-	-	-	-	-	-	-	-	-	-	-	-	-
AX-176823735	Aradu.A10	95157723	Sten1	-	-	-	-	-	-	-	-	-	-	-	-	-	-	-	-	-	-	-	-	-	-	-	-	-	-	-	-	-	-	-	-	-	-	-	-	-	-	-	-	-	-	-	-	-	-
AX-176795549	Aradu.A10	95250338	Sten2	Sten1	Sten2	Sten2	Sten1	Sten2	Sten2	Sten2	Sten1	Sten2	Sten1	Sten1	Sten2	Sten2	Sten2	Sten2	Sten1	Sten1	Sten2	Sten2	Sten1	-	Sten2	Sten2	Sten2	Sten2	Sten2	Sten2	Sten2	Sten2	Sten2	-	Sten1	Sten2	-	-	Sten2	Sten2	Sten2	Sten2	Sten2	Sten2	Sten1	Sten2	Sten2	Sten2	Sten2
AX-177640316	Aradu.A10	97813091	-	-	-	-	-	-	-	-	-	-	-	-	-	-	-	-	-	-	-	-	-	-	-	-	-	-	-	-	-	-	-	-	-	-	-	-	-	-	-	-	-	-	-	-	-	-	-
AX-177640815	Aradu.A10	97976609	Sten1	-	-	-	-	-	-	-	-	-	-	-	-	-	-	-	-	-	-	-	-	-	-	-	-	-	-	-	-	-	-	-	-	-	-	-	-	-	-	-	-	-	-	-	-	-	-
AX-176813315	Aradu.A10	98891152	Sten1	-	-	-	-	-	-	-	-	-	-	-	-	-	-	-	-	-	-	-	-	-	-	-	-	-	-	-	-	-	-	-	-	-	-	-	-	-	-	-	-	-	-	-	-	-	-
AX-147236571	Aradu.A10	99172713	Sten1	-	-	-	-	-	-	-	-	-	-	-	-	-	-	-	-	-	-	-	-	-	-	-	-	-	-	-	-	-	-	-	-	-	-	-	-	-	-	-	-	-	-	-	-	-	-
AX-147236642	Aradu.A10	100698734	Sten1	-	-	-	-	-	-	-	-	-	-	-	-	-	-	-	-	-	-	-	-	-	-	-	-	-	-	-	-	-	-	-	-	-	-	-	-	-	-	-	-	-	-	-	-	-	-
AX-176791584	Aradu.A10	101233597	Sten1	-	-	-	-	-	-	-	-	-	-	-	-	-	-	-	-	-	-	-	-	-	-	-	-	-	-	-	-	-	-	-	-	-	-	-	-	-	-	-	-	-	-	-	-	-	-
AX-147236751	Aradu.A10	102629772	-	-	-	-	-	-	-	-	-	-	-	-	-	-	-	-	-	-	-	-	-	-	-	-	-	-	-	-	-	-	-	-	-	-	-	-	-	-	-	-	-	-	-	-	-	-	-
AX-147236821	Aradu.A10	104138451	Sten1	-	-	-	-	-	-	-	-	-	-	-	-	-	-	-	-	-	-	-	-	-	-	-	-	-	-	-	-	-	-	-	-	-	-	-	-	-	-	-	-	-	-	-	-	-	-
AX-147236829	Aradu.A10	104321878	Sten1	-	-	-	-	-	-	-	-	-	-	-	-	-	-	-	-	-	-	-	-	-	-	-	-	-	-	-	-	-	-	-	-	-	-	-	-	-	-	-	-	-	-	-	-	-	-
AX-147236836	Aradu.A10	104350153	Sten1	-	-	-	-	-	-	-	-	-	-	-	-	-	-	-	-	-	-	-	-	-	-	-	-	-	-	-	-	-	-	-	-	-	-	-	-	-	-	-	-	-	-	-	-	-	-
AX-147236852	Aradu.A10	104660224	Sten1	-	-	-	-	-	-	-	-	-	-	-	-	-	-	-	-	-	-	-	-	-	-	-	-	-	-	-	-	-	-	-	-	-	-	-	-	-	-	-	-	-	-	-	-	-	-
AX-147236856	Aradu.A10	104674897	Sten1	-	-	-	-	-	-	-	-	-	-	-	-	-	-	-	-	-	-	-	-	-	-	-	-	-	-	-	-	-	-	-	-	-	-	-	-	-	-	-	-	-	-	-	-	-	-
AX-147236909	Aradu.A10	105330517	-	-	-	-	-	-	-	-	-	-	-	-	-	-	-	-	-	-	-	-	-	-	-	-	-	-	-	-	-	-	-	-	-	-	-	-	-	-	-	-	-	-	-	-	-	-	-
AX-147236910	Aradu.A10	105330547	Sten2	-	-	-	-	-	-	-	-	-	-	-	-	-	-	-	-	-	-	-	-	-	-	-	-	-	-	-	-	-	-	-	-	-	-	-	-	-	-	-	-	-	-	-	-	-	-
AX-147236916	Aradu.A10	105362018	Sten1	-	-	-	-	-	-	-	-	-	-	-	-	-	-	-	-	-	-	-	-	-	-	-	-	-	-	-	-	-	-	-	-	-	-	-	-	-	-	-	-	-	-	-	-	-	-
AX-176812613	Aradu.A10	105771895	-	-	-	-	-	-	-	-	-	-	-	-	-	-	-	-	-	-	-	-	-	-	-	-	-	-	-	-	-	-	-	-	-	-	-	-	-	-	-	-	-	-	-	-	-	-	-
AX-176803471	Aradu.A10	106521723	-	-	-	-	-	-	-	-	-	-	-	-	-	-	-	-	-	-	-	-	-	-	-	-	-	-	-	-	-	-	-	-	-	-	-	-	-	-	-	-	-	-	-	-	-	-	-
AX-147237116	Aradu.A10	107338680	Sten1	-	-	-	-	-	-	-	-	-	-	-	-	-	-	-	-	-	-	-	-	-	-	-	-	-	-	-	-	-	-	-	-	-	-	-	-	-	-	-	-	-	-	-	-	-	-
AX-147237141	Aradu.A10	107485112	Sten1	-	-	-	-	-	-	-	-	-	-	-	-	-	-	-	-	-	-	-	-	-	-	-	-	-	-	-	-	-	-	-	-	-	-	-	-	-	-	-	-	-	-	-	-	-	-
AX-147237166	Aradu.A10	107674813	Sten1	-	-	-	-	-	-	-	-	-	-	-	-	-	-	-	-	-	-	-	-	-	-	-	-	-	-	-	-	-	-	-	-	-	-	-	-	-	-	-	-	-	-	-	-	-	-
AX-147237210	Aradu.A10	107885754	Sten1	-	-	-	-	-	-	-	-	-	-	-	-	-	-	-	-	-	-	-	-	-	-	-	-	-	-	-	-	-	-	-	-	-	-	-	-	-	-	-	-	-	-	-	-	-	-
AX-147237245	Aradu.A10	108153415	Sten1	-	-	-	-	-	-	-	-	-	-	-	-	-	-	-	-	-	-	-	-	-	-	-	-	-	-	-	-	-	-	-	-	-	-	-	-	-	-	-	-	-	-	-	-	-	-
AX-147237298	Aradu.A10	108838533	Sten1	-	-	-	-	-	-	-	-	-	-	-	-	-	-	-	-	-	-	-	-	-	-	-	-	-	-	-	-	-	-	-	-	-	-	-	-	-	-	-	-	-	-	-	-	-	-
AX-147237421	#REF!	#REF!	-	-	-	-	-	-	-	-	-	-	-	-	-	-	-	-	-	-	-	-	-	-	-	-	-	-	-	-	-	-	-	-	-	-	-	-	-	-	-	-	-	-	-	-	-	-	-
AX-147237432	Araip.B01	525042	Mag2	-	-	-	-	-	-	-	-	-	-	-	-	-	-	-	-	-	-	-	-	-	-	-	-	-	-	-	-	-	-	-	-	-	-	-	-	-	-	-	-	-	-	-	-	-	-
AX-147237458	Araip.B01	769119	Mag2	-	-	-	-	-	-	-	-	-	-	-	-	-	-	-	-	-	-	-	-	-	-	-	-	-	-	-	-	-	-	-	-	-	-	-	-	-	-	-	-	-	-	-	-	-	-
AX-147237465	Araip.B01	896297	Mag2	-	-	-	-	-	-	-	-	-	-	-	-	-	-	-	-	-	-	-	-	-	-	-	-	-	-	-	-	-	-	-	-	-	-	-	-	-	-	-	-	-	-	-	-	-	-
AX-147209810	Araip.B01	1128855	Mag2	-	-	-	-	-	-	-	-	-	-	-	-	-	-	-	-	-	-	-	-	-	-	-	-	-	-	-	-	-	-	-	-	-	-	-	-	-	-	-	-	-	-	-	-	-	-
AX-147237495	Araip.B01	1220452	Mag2	-	-	-	-	-	-	-	-	-	-	-	-	-	-	-	-	-	-	-	-	-	-	-	-	-	-	-	-	-	-	-	-	-	-	-	-	-	-	-	-	-	-	-	-	-	-
AX-147209678	Araip.B01	1431059	Mag1	-	-	-	-	-	-	-	-	-	-	-	-	-	-	-	-	-	-	-	-	-	-	-	-	-	-	-	-	-	-	-	-	-	-	-	-	-	-	-	-	-	-	-	-	-	-
AX-147237529	Araip.B01	1453243	Mag2	-	-	-	-	-	-	-	-	-	-	-	-	-	-	-	-	-	-	-	-	-	-	-	-	-	-	-	-	-	-	-	-	-	-	-	-	-	-	-	-	-	-	-	-	-	-
AX-147237587	Araip.B01	2102983	Mag2	-	-	-	-	-	-	-	-	-	-	-	-	-	-	-	-	-	-	-	-	-	-	-	-	-	-	-	-	-	-	-	-	-	-	-	-	-	-	-	-	-	-	-	-	-	-
AX-147208994	Araip.B01	3439024	Mag2	-	-	-	-	-	-	-	-	-	-	-	-	-	-	-	-	-	-	-	-	-	-	-	-	-	-	-	-	-	-	-	-	-	-	-	-	-	-	-	-	-	-	-	-	-	-
AX-147208955	Araip.B01	3624699	Mag2	-	-	-	-	-	-	-	-	-	-	-	-	-	-	-	-	-	-	-	-	-	-	-	-	-	-	-	-	-	-	-	-	-	-	-	-	-	-	-	-	-	-	-	-	-	-
AX-147237696	Araip.B01	3963695	Mag2	-	-	-	-	-	-	-	-	-	-	-	-	-	-	-	-	-	-	-	-	-	-	-	-	-	-	-	-	-	-	-	-	-	-	-	-	-	-	-	-	-	-	-	-	-	-
AX-176791972	Araip.B01	3991793	Mag2	-	-	-	-	-	-	-	-	-	-	-	-	-	-	-	-	-	-	-	-	-	-	-	-	-	-	-	-	-	-	-	-	-	-	-	-	-	-	-	-	-	-	-	-	-	-
AX-176791872	Araip.B01	5672434	Mag2	-	Mag1	-	Mag1	-	Mag1	-	Mag1	-	Mag1	-	Mag2	-	Mag1	-	-	-	-	Mag2	-	Mag1	-	-	-	-	-	Mag1	-	-	-	-	-	Mag2	-	Mag1	-	Mag1	Mag1	-	Mag2	-	Mag1	-	Mag1	-	Mag1
AX-147237828	Araip.B01	6337719	Mag2	-	-	-	-	-	-	-	-	-	-	-	-	-	-	-	-	-	-	-	-	-	-	-	-	-	-	-	-	-	-	-	-	-	-	-	-	-	-	-	-	-	-	-	-	-	-
AX-147237868	Araip.B01	7216931	Mag1	-	-	-	-	-	-	-	-	-	-	-	-	-	-	-	-	-	-	-	-	-	-	-	-	-	-	-	-	-	-	-	-	-	-	-	-	-	-	-	-	-	-	-	-	-	-
AX-147237874	Araip.B01	7369157	Mag2	-	-	-	-	-	-	-	-	-	-	-	-	-	-	-	-	-	-	-	-	-	-	-	-	-	-	-	-	-	-	-	-	-	-	-	-	-	-	-	-	-	-	-	-	-	-
AX-176791994	Araip.B01	9391666	Mag2	-	-	-	-	-	-	-	-	-	-	-	-	-	-	-	-	-	-	-	-	-	-	-	-	-	-	-	-	-	-	-	-	-	-	-	-	-	-	-	-	-	-	-	-	-	-
AX-147207903	Araip.B01	13030024	Mag2	-	-	-	-	-	-	-	-	-	-	-	-	-	-	-	-	-	-	-	-	-	-	-	-	-	-	-	-	-	-	-	-	-	-	-	-	-	-	-	-	-	-	-	-	-	-
AX-147238071	Araip.B01	13582092	Mag2	-	-	-	-	-	-	-	-	-	-	-	-	-	-	-	-	Mag1	-	Mag1	-	Mag1	-	Mag1	-	Mag1	-	Mag2	-	Mag1	-	Mag1	-	Mag1	-	Mag1	-	Mag2	Mag1	-	-	-	-	-	-	-	-
AX-176819138	Araip.B01	17264472	Mag2	-	-	Mag2	-	-	-	Mag1	-	-	-	-	-	-	-	-	-	Mag1	-	-	-	-	-	-	-	-	-	-	-	-	-	-	-	-	-	-	-	-	-	Mag1	-	Mag1	-	Mag2	-	-	-
AX-177639009	Araip.B01	18257524	Mag1	-	-	-	-	-	-	-	-	-	-	-	-	-	-	-	-	-	-	-	-	-	-	-	-	-	-	-	-	-	-	-	-	-	-	-	-	-	-	-	-	-	-	-	-	-	-
AX-176797559	Araip.B01	22199621	-	Mag1	-	-	-	-	-	-	-	Mag1	-	-	-	-	-	-	-	Mag1	-	-	-	-	Mag1	-	-	-	-	-	-	-	-	-	-	-	-	-	-	-	-	Mag1	-	Mag1	-	Mag2	-	-	-
AX-147238252	Araip.B01	24245922	Mag1	-	-	Mag2	-	-	-	Mag1	-	Mag1	-	-	-	-	-	-	-	Mag1	-	-	-	-	-	-	-	-	-	-	-	-	-	-	-	-	-	-	-	-	-	Mag1	-	Mag1	-	Mag2	-	-	-
AX-147224970	Araip.B01	27441886	Mag1	-	-	-	-	Mag1	-	-	-	-	-	-	-	-	-	-	-	-	-	-	-	-	-	-	-	-	-	-	-	-	-	-	-	-	-	-	-	-	-	-	-	-	-	-	-	Mag1	-
AX-176792599	Araip.B01	28280638	Mag1	-	-	-	-	-	-	-	-	-	-	-	-	-	-	-	-	-	-	-	-	-	-	-	-	-	-	-	-	-	-	-	-	-	-	-	-	-	-	-	-	-	-	-	-	-	-
AX-176809240	Araip.B01	32580976	Mag1	-	-	Mag1	-	-	-	Mag1	-	Mag1	-	-	-	-	-	-	-	Mag1	-	-	-	-	-	-	-	-	-	-	-	-	-	-	-	-	-	-	-	-	-	-	-	Mag1	-	Mag1	-	-	-
AX-176791759	Araip.B01	33166457	Mag2	-	-	Mag2	-	-	-	Mag1	-	Mag1	-	-	-	-	-	-	-	Mag1	-	-	-	-	-	-	-	-	-	-	-	-	-	-	-	-	-	-	-	-	-	Mag1	-	Mag1	-	Mag2	-	-	-
AX-176823511	Araip.B01	33888690	Mag2	-	-	Mag2	-	-	-	Mag1	-	Mag1	-	-	-	-	-	-	-	-	-	-	-	-	-	-	-	-	-	-	-	-	-	-	-	-	-	-	-	-	-	Mag1	-	Mag1	-	Mag2	-	-	-
AX-176819865	Araip.B01	36538462	Mag2	-	-	Mag2	-	-	-	Mag1	-	Mag1	-	-	-	-	-	-	-	Mag1	-	-	-	-	-	-	-	-	-	-	-	-	-	-	-	-	-	-	-	-	-	Mag1	-	Mag1	-	Mag2	-	-	-
AX-176813854	Araip.B01	41386088	Mag2	-	-	Mag2	-	-	-	Mag1	-	Mag1	-	-	-	-	-	-	-	Mag1	-	-	-	-	-	-	-	-	-	-	-	-	-	-	-	-	-	-	-	-	-	Mag1	-	Mag1	-	Mag2	-	-	-
AX-176808043	Araip.B01	47005832	-	-	-	-	-	-	-	-	-	-	-	-	-	-	-	-	-	-	-	-	-	-	-	-	-	-	-	-	-	-	-	-	-	-	-	-	-	-	-	-	-	-	-	-	-	-	-
AX-176795601	Araip.B01	52956625	Mag1	-	-	Mag2	-	-	-	Mag1	-	Mag1	-	-	-	-	-	-	-	Mag1	-	-	-	-	-	-	-	-	-	-	-	-	-	-	-	-	-	-	-	-	-	Mag1	-	Mag1	-	Mag2	-	-	-
AX-176815179	Araip.B01	65696288	Mag2	-	-	Mag2	-	-	-	Mag1	-	Mag1	-	-	-	-	-	-	-	Mag1	-	-	-	-	Mag1	Mag1	-	-	-	-	-	-	-	-	-	-	-	-	-	-	-	Mag1	-	Mag1	-	Mag2	-	-	-
AX-147214594	Araip.B01	69167034	Mag2	-	-	Mag2	-	-	-	Mag2	-	Mag2	-	-	-	-	-	-	-	Mag2	-	-	-	-	-	-	-	-	-	-	-	-	-	-	-	-	-	-	-	Mag1	-	Mag2	-	Mag2	-	Mag2	-	-	-
AX-176808868	Araip.B01	113755738	Mag1	-	-	Mag2	-	-	-	Mag1	-	Mag1	-	-	-	-	-	-	-	-	-	-	-	-	-	-	-	-	-	-	-	-	-	-	-	-	-	-	-	-	-	Mag1	-	Mag1	-	Mag2	-	-	-
AX-147238796	Araip.B01	114749669	-	-	-	Mag2	-	-	-	Mag1	-	Mag1	-	-	-	-	-	-	-	Mag1	-	-	-	-	-	-	-	-	-	-	-	-	-	-	-	-	-	-	-	-	-	Mag1	-	Mag1	-	Mag2	-	-	-
AX-147238820	Araip.B01	116043545	Mag2	-	-	Mag2	-	-	-	Mag1	-	Mag1	-	-	-	-	-	-	-	Mag1	-	-	-	-	-	-	-	-	-	-	-	-	-	-	-	-	-	-	-	-	-	Mag1	-	Mag1	-	Mag2	-	-	-
AX-176791457	Araip.B01	116719216	Mag2	-	-	Mag2	-	-	-	Mag1	-	Mag1	-	-	-	-	-	-	-	Mag1	-	-	-	-	-	-	-	-	-	-	-	-	-	-	-	-	-	-	-	-	-	Mag1	-	Mag1	-	Mag2	-	-	-
AX-176802580	Araip.B01	117112930	-	-	-	Mag2	-	-	-	Mag1	-	-	-	-	-	-	-	-	-	Mag1	-	-	-	-	-	-	-	-	-	-	Mag1	-	-	-	-	-	-	-	-	-	-	Mag1	-	Mag1	-	Mag2	-	-	-
AX-176819387	Araip.B01	121368506	-	-	-	-	-	-	-	-	-	-	-	-	-	-	-	-	-	-	-	-	-	-	-	-	-	-	-	-	-	-	-	-	-	-	-	-	-	-	-	-	-	-	-	-	-	-	-
AX-147238924	Araip.B01	121642962	Mag2	-	-	Mag2	-	-	-	Mag1	-	Mag1	-	-	-	-	-	-	-	Mag1	-	-	-	-	-	-	-	-	-	-	-	-	-	-	-	-	-	-	-	-	-	Mag1	-	Mag1	-	Mag2	-	-	-
AX-147238948	Araip.B01	122737994	Mag2	-	-	Mag2	-	-	-	Mag1	-	Mag1	-	-	-	-	-	-	-	Mag1	-	-	-	-	-	-	-	-	-	-	-	-	-	-	-	-	-	-	-	-	-	Mag1	-	Mag1	-	Mag2	-	-	-
AX-147239005	Araip.B01	124135621	Mag2	-	-	Mag2	-	-	-	Mag1	-	Mag1	-	-	-	-	-	-	-	Mag1	-	-	-	-	-	-	-	-	-	-	-	-	-	-	-	-	-	-	-	-	-	Mag1	-	Mag1	-	Mag2	-	-	-
AX-176792079	Araip.B01	125661644	Mag2	-	-	Mag2	-	-	-	Mag1	-	Mag1	-	-	-	-	-	-	-	Mag1	-	-	-	-	-	-	-	-	-	-	-	-	-	-	-	-	-	-	-	-	-	Mag1	-	Mag1	-	Mag2	-	-	-
AX-147239087	Araip.B01	126121763	Mag2	-	-	Mag2	-	-	-	Mag1	-	Mag1	-	-	-	-	-	-	-	Mag1	-	-	-	-	-	-	-	-	-	-	-	-	Mag1	-	-	-	-	-	-	-	-	Mag1	-	Mag1	-	Mag2	-	-	-
AX-147239097	Araip.B01	126275267	Mag1	-	-	Mag2	-	-	-	Mag1	-	Mag1	-	-	-	-	-	-	-	Mag1	-	-	-	-	-	-	-	-	-	-	-	-	-	-	-	-	-	-	-	-	-	Mag1	-	Mag1	-	Mag2	-	-	-
AX-147239126	Araip.B01	127008022	Mag2	-	-	Mag2	-	-	-	Mag1	-	Mag1	-	-	-	-	-	-	-	Mag1	-	-	-	-	-	-	-	-	-	-	-	-	-	-	-	-	-	-	-	-	-	Mag1	-	Mag1	-	Mag2	-	-	-
AX-147239132	Araip.B01	127063836	Mag1	-	-	Mag2	-	-	-	Mag1	-	Mag1	-	-	-	-	-	-	-	Mag1	-	-	-	-	-	-	-	-	-	-	-	-	-	-	-	-	-	-	-	-	-	Mag1	-	Mag1	-	Mag2	-	-	-
AX-147239229	Araip.B01	129329429	Mag2	-	-	Mag2	-	-	-	Mag1	-	Mag1	-	-	-	-	-	-	-	Mag1	-	-	-	-	-	-	-	-	-	-	-	-	-	-	-	-	-	-	-	-	-	Mag1	-	Mag1	-	Mag2	-	-	-
AX-147239236	Araip.B01	129357167	Mag2	-	-	Mag2	-	-	-	Mag1	-	Mag1	-	-	-	-	-	-	-	Mag1	-	-	-	-	-	-	-	-	-	-	-	-	-	-	-	-	-	-	-	-	-	Mag1	-	Mag1	-	Mag2	-	-	-
AX-176791354	Araip.B01	129513514	-	-	-	Mag1	-	-	-	-	-	Mag1	-	-	-	-	-	-	-	Mag1	-	-	-	-	-	-	-	-	-	-	-	-	-	-	-	-	-	-	-	-	-	-	-	Mag1	-	Mag1	-	-	-
AX-147239269	Araip.B01	129771687	Mag2	-	-	Mag2	-	-	-	Mag1	-	Mag1	-	-	-	-	-	-	-	Mag1	-	-	-	-	-	-	-	-	-	-	-	-	-	-	-	-	-	-	-	-	-	Mag1	-	Mag1	-	Mag2	-	-	-
AX-147239280	Araip.B01	129882691	Mag2	-	-	Mag2	-	-	-	Mag1	-	Mag1	-	-	-	-	-	-	-	Mag1	-	-	-	-	-	-	-	-	-	-	-	-	-	-	-	-	-	-	-	-	-	Mag1	-	Mag1	-	Mag2	-	-	-
AX-147239347	Araip.B01	131386591	Mag2	-	-	Mag2	-	-	-	Mag1	-	Mag1	-	-	-	-	-	-	-	Mag1	-	-	-	-	-	-	-	-	-	-	-	-	-	-	-	-	-	-	-	-	-	Mag1	-	Mag1	-	Mag2	-	-	-
AX-147239400	Araip.B01	132569217	Mag1	-	-	-	-	-	-	-	-	-	-	-	-	-	-	-	-	-	-	-	-	-	-	-	-	-	-	-	-	-	-	-	-	-	-	-	-	-	-	-	-	-	-	-	-	-	-
AX-147239423	Araip.B01	133926550	Mag2	-	-	-	-	-	-	-	-	-	-	-	-	-	-	-	-	-	-	-	-	-	-	-	-	-	-	-	-	-	-	-	-	-	-	-	-	-	-	-	-	-	-	-	-	-	-
AX-147239547	Araip.B01	135112455	-	-	-	-	-	-	-	-	-	-	-	-	-	-	-	-	-	-	-	-	-	-	-	-	-	-	-	-	-	-	-	-	-	-	-	-	-	-	-	-	-	-	-	-	-	-	-
AX-176791498	Araip.B01	135222846	Mag2	-	-	-	-	-	-	-	-	-	-	-	-	-	-	-	-	-	-	-	-	-	-	-	-	-	-	-	-	-	-	-	-	-	-	-	-	-	-	-	-	-	-	-	-	-	-
AX-147239650	Araip.B01	136439457	-	-	-	-	-	-	-	-	-	-	-	-	-	-	-	-	-	-	-	-	-	-	-	-	-	-	-	-	-	-	-	-	-	-	-	-	-	-	-	-	-	-	-	-	-	-	-
AX-147239660	Araip.B01	136506177	Mag2	-	-	-	-	-	-	-	-	-	-	-	-	-	-	-	-	-	-	-	-	-	-	-	-	-	-	-	-	-	-	-	-	-	-	-	-	-	-	-	-	-	-	-	-	-	-
AX-147239736	Araip.B01	137130556	Mag1	-	-	-	-	-	-	-	-	-	-	-	-	-	-	-	-	-	-	-	-	-	-	-	-	-	-	-	-	-	-	-	-	-	-	-	-	-	-	-	-	-	-	-	-	-	-
AX-147239792	Araip.B02	262035	Mag2	-	-	-	-	-	-	-	-	-	-	-	-	-	-	-	-	-	-	-	-	-	-	-	-	-	-	-	-	-	-	-	-	-	-	-	-	-	-	-	-	-	-	-	-	-	-
AX-147239806	Araip.B02	378957	Mag2	-	-	-	-	-	-	-	-	-	-	-	-	-	-	-	-	-	-	-	-	-	-	-	-	-	-	-	-	-	-	-	-	-	-	-	-	-	-	-	-	-	-	-	-	-	-
AX-176791791	Araip.B02	402830	Mag1	-	-	-	-	-	-	-	-	-	-	-	-	-	-	-	-	-	-	-	-	-	-	-	-	-	-	-	-	-	-	-	-	-	-	-	-	-	-	-	-	-	-	-	-	-	-
AX-147239826	Araip.B02	463495	Mag1	-	-	-	-	-	-	-	-	-	-	-	-	-	-	-	-	-	-	-	-	-	-	-	-	-	-	-	-	-	-	-	-	-	-	-	-	-	-	-	-	-	-	-	-	-	-
AX-176791481	Araip.B02	492391	-	-	-	-	-	-	-	-	-	-	-	-	-	-	-	-	-	-	-	-	-	-	-	-	-	-	-	-	-	-	-	-	-	-	-	-	-	-	-	-	-	-	-	-	-	-	-
AX-147212492	Araip.B02	778642	-	-	-	-	-	-	-	-	-	-	-	-	-	-	-	-	-	-	-	-	-	-	-	-	-	-	-	-	-	-	-	-	-	-	-	-	-	-	-	-	-	-	-	-	-	-	-
AX-147239986	Araip.B02	1296859	Mag2	-	-	-	-	-	-	-	-	-	-	-	-	-	-	-	-	-	-	-	-	-	-	-	-	-	-	-	-	-	-	-	-	-	-	-	-	-	-	-	-	-	-	-	-	-	-
AX-176819098	Araip.B02	1316076	Mag2	-	-	-	-	-	-	-	-	-	-	-	-	-	-	-	-	-	-	-	-	-	-	-	-	-	-	-	-	-	-	-	-	-	-	-	-	-	-	-	-	-	-	-	-	-	-
AX-147240075	Araip.B02	1620220	-	-	-	-	-	-	-	-	-	-	-	-	-	-	-	-	-	-	-	-	-	-	Mag1	-	Mag1	-	Mag1	-	Mag1	-	-	-	Mag1	-	Mag1	-	-	-	-	-	-	-	-	-	-	-	-
AX-147240114	Araip.B02	1783128	Mag2	-	-	-	-	-	-	-	-	-	-	-	-	-	-	-	-	-	-	-	-	-	Mag1	-	Mag1	-	Mag1	-	Mag1	-	-	-	Mag1	-	Mag1	-	Mag1	-	-	-	-	-	-	-	-	-	-
AX-147240166	Araip.B02	1979905	Mag1	-	-	-	-	-	-	-	-	-	-	-	-	-	-	-	-	-	-	-	-	-	-	-	-	-	-	-	-	-	-	-	-	-	-	-	-	-	-	-	-	-	-	-	-	-	-
AX-147240256	Araip.B02	2197152	Mag2	-	-	-	-	-	-	-	-	-	-	-	-	-	-	-	-	-	-	-	-	-	Mag1	-	Mag1	-	Mag1	-	Mag1	-	-	-	Mag1	-	Mag1	-	-	-	-	-	-	-	-	-	-	-	-
AX-147240277	Araip.B02	2291623	Mag2	-	-	-	-	-	-	-	-	-	-	-	-	-	-	-	-	-	-	-	-	-	Mag2	-	Mag1	-	Mag1	-	Mag1	-	-	-	Mag1	-	Mag1	-	Mag1	-	-	-	-	-	-	-	-	-	-
AX-176792068	Araip.B02	2365066	Mag1	-	-	-	-	-	-	-	-	-	-	-	-	-	-	-	-	-	-	-	-	-	-	-	-	-	-	-	-	-	-	-	-	-	-	-	-	-	-	-	-	-	-	-	-	-	-
AX-147240299	Araip.B02	2423971	Mag1	-	-	-	-	-	-	-	-	-	-	-	-	-	-	-	-	-	-	-	-	-	-	-	-	-	-	-	-	-	-	-	-	-	-	-	-	-	-	-	-	-	-	-	-	-	-
AX-147240304	Araip.B02	2467872	Mag2	-	-	-	-	-	-	-	-	-	-	-	-	-	-	-	-	-	-	-	-	-	Mag1	-	Mag1	-	Mag1	-	Mag1	-	-	-	Mag1	-	Mag1	-	Mag1	-	-	-	-	-	-	-	-	-	-
AX-147212805	Araip.B02	2510172	Mag2	-	-	-	-	-	-	-	-	-	-	-	-	-	-	-	-	-	-	-	-	-	-	-	Mag1	-	Mag1	-	Mag1	-	-	-	Mag1	-	Mag1	-	Mag1	-	-	-	-	-	-	-	-	-	-
AX-147240437	Araip.B02	4591623	Mag2	-	-	-	-	-	-	-	-	-	-	-	-	-	-	-	-	-	-	-	-	-	Mag1	-	Mag1	-	Mag1	-	Mag1	-	-	-	Mag1	-	Mag1	-	Mag1	-	-	-	-	-	-	-	-	-	-
AX-147240444	Araip.B02	4649921	Mag2	-	-	-	-	-	-	-	-	-	-	-	-	-	-	-	-	-	-	-	-	-	Mag1	-	Mag1	-	Mag1	-	Mag1	-	-	-	Mag1	-	Mag1	-	Mag1	-	-	-	-	-	-	-	-	-	-
AX-147240690	Araip.B02	7756210	Mag2	-	-	-	-	-	-	-	-	-	-	-	-	-	-	-	-	-	-	-	-	-	Mag1	-	-	-	Mag1	-	-	-	-	-	Mag1	-	Mag1	-	Mag1	-	-	-	-	-	-	-	-	-	-
AX-176791647	Araip.B02	7863983	-	-	-	-	-	-	-	-	-	-	-	-	-	-	-	-	-	-	-	-	-	-	Mag1	-	Mag1	-	Mag1	-	Mag1	-	-	-	Mag1	-	Mag1	-	-	-	-	-	-	-	-	-	-	-	-
AX-147240758	Araip.B02	9327175	Mag1	-	-	-	-	-	-	-	-	-	-	-	-	-	-	-	-	-	-	-	-	-	Mag1	-	Mag1	-	Mag1	-	Mag1	-	-	-	Mag1	-	Mag1	-	Mag1	-	-	-	-	-	-	-	-	-	-
AX-147240783	Araip.B02	10083831	Mag2	-	-	-	-	-	-	-	-	-	-	-	-	-	-	-	-	-	-	-	-	-	Mag1	-	Mag1	-	Mag1	-	Mag1	-	-	-	Mag1	-	Mag1	-	Mag1	-	-	-	-	-	-	-	-	-	-
AX-147240868	Araip.B02	12432351	Mag2	-	-	-	-	-	-	-	-	-	-	-	-	-	-	-	-	-	-	-	-	-	-	-	Mag1	-	Mag1	-	Mag1	-	-	-	Mag1	-	Mag1	-	Mag1	-	-	-	-	-	-	-	-	-	-
AX-176816559	Araip.B02	13566985	Mag2	-	-	-	-	-	-	-	-	-	-	-	-	-	-	-	-	-	-	-	-	-	-	-	Mag1	-	Mag1	-	Mag1	-	-	-	Mag1	-	Mag1	-	Mag1	-	-	-	-	-	-	-	-	-	-
AX-147240981	Araip.B02	16302789	Mag2	-	-	-	-	-	-	-	-	-	-	-	-	-	-	-	-	-	-	-	-	-	-	-	Mag1	-	Mag1	-	Mag1	-	-	-	Mag1	-	Mag1	-	Mag1	-	-	-	-	-	-	-	-	-	-
AX-147240987	Araip.B02	16781198	Mag2	-	-	-	-	-	-	-	-	-	-	-	-	-	-	-	-	-	-	-	-	-	-	-	Mag1	-	Mag1	-	Mag1	-	-	-	Mag1	-	Mag1	-	Mag1	-	-	-	-	-	-	-	-	-	-
AX-176814069	Araip.B02	25034123	-	-	-	-	-	-	-	-	-	-	-	-	-	-	-	-	-	-	-	-	-	-	-	-	Mag1	-	Mag1	-	Mag1	-	-	-	Mag1	-	Mag1	-	Mag1	-	-	-	-	-	-	-	-	-	-
AX-147241160	Araip.B02	26040338	-	-	-	-	-	-	-	-	-	-	-	-	-	-	-	-	-	-	-	-	-	-	-	-	-	-	-	-	-	-	-	-	-	-	-	-	-	-	-	-	-	-	-	-	-	-	-
AX-176793938	Araip.B02	26874221	Mag1	-	-	-	-	-	-	-	-	-	-	-	-	-	-	-	-	-	-	-	-	-	-	-	-	-	-	-	-	-	-	-	-	-	-	-	-	-	-	-	-	-	-	-	-	-	-
AX-176818716	Araip.B02	28746336	Mag1	-	-	-	-	-	-	-	-	-	-	-	-	-	-	-	-	-	-	-	-	-	-	-	-	-	-	-	-	-	-	-	-	-	-	-	-	-	-	-	-	-	-	-	-	-	-
AX-147241224	Araip.B02	30338997	Mag1	-	-	-	-	-	-	-	-	-	-	-	-	-	-	-	-	-	-	-	-	-	-	-	-	-	-	-	-	-	-	-	-	-	-	-	-	-	-	-	-	-	-	-	-	-	-
AX-176810584	Araip.B02	73563415	-	-	-	-	-	-	-	-	-	-	-	-	-	-	-	-	-	-	-	-	-	-	Mag1	-	Mag1	-	Mag1	-	Mag1	-	-	-	Mag1	-	Mag1	-	-	-	-	-	-	-	-	-	-	-	-
AX-176799100	Araip.B02	77006475	-	-	-	-	-	-	-	-	-	-	-	-	-	-	-	-	-	-	-	-	-	-	-	-	-	-	-	-	-	-	-	-	-	-	-	-	-	-	-	-	-	-	-	-	-	-	-
AX-147241656	Araip.B02	82436771	Mag1	-	-	-	-	-	-	-	-	-	-	-	-	-	-	-	-	-	-	-	-	-	-	-	Mag1	-	Mag1	-	Mag1	-	Mag1	-	Mag1	-	Mag1	-	Mag1	-	-	-	-	-	-	-	-	-	-
AX-176793794	Araip.B02	82582784	Mag2	-	-	-	-	-	-	-	-	-	-	-	-	-	-	-	-	-	-	-	-	-	-	-	Mag1	-	Mag1	-	Mag1	-	Mag1	-	Mag1	-	Mag1	-	Mag1	-	-	-	-	-	-	-	-	-	-
AX-147241677	Araip.B02	83660131	Mag2	-	-	-	-	-	-	-	-	-	-	-	-	-	-	-	-	-	-	-	-	-	-	-	Mag1	-	Mag1	-	Mag1	-	Mag1	-	Mag1	-	Mag1	-	Mag1	-	-	-	-	-	-	-	-	-	-
AX-147241682	Araip.B02	83956837	Mag2	-	-	-	-	-	-	-	-	-	-	-	-	-	-	-	-	-	-	-	-	-	-	-	Mag1	-	Mag1	-	Mag1	-	Mag1	-	Mag1	-	Mag1	-	Mag1	-	-	-	-	-	-	-	-	-	-
AX-147241702	Araip.B02	84802896	Mag2	-	-	-	-	-	-	-	-	-	-	-	-	-	-	-	-	-	-	-	-	-	-	-	Mag1	-	Mag1	-	Mag1	-	Mag1	-	Mag1	-	Mag1	-	Mag1	-	-	-	-	-	-	-	-	-	-
AX-176816700	Araip.B02	85124123	-	-	-	-	-	-	-	-	-	-	-	-	-	-	-	-	-	-	-	-	-	-	-	-	-	-	-	-	-	-	-	-	-	-	-	-	-	-	-	-	-	-	-	-	-	-	-
AX-147241709	Araip.B02	85213180	Mag1	-	-	-	-	-	-	-	-	-	-	-	-	-	-	-	-	-	-	-	-	-	Mag1	-	Mag1	-	Mag1	-	Mag1	-	Mag1	-	Mag1	-	Mag1	-	-	-	-	-	-	-	-	-	-	-	-
AX-176816711	Araip.B02	88992967	Mag1	-	-	-	-	-	-	-	-	-	-	-	-	-	Mag1	-	-	-	-	-	-	-	-	-	-	-	-	-	-	-	-	-	-	-	-	-	-	-	-	-	-	-	Mag1	-	-	-	-
AX-176800139	Araip.B02	90402608	Mag1	-	-	-	-	-	-	-	-	-	-	-	-	-	-	-	-	-	-	-	-	-	-	-	-	-	-	-	-	-	-	-	-	-	Mag1	-	-	-	-	-	-	-	-	-	-	-	-
AX-147241916	Araip.B02	91975066	-	-	-	-	-	-	-	-	-	-	-	-	-	-	-	-	-	-	Mag1	-	-	-	-	Mag1	Mag1	-	Mag1	-	-	-	Mag1	-	-	-	-	-	Mag1	-	-	-	-	-	-	-	-	-	-
AX-147242039	Araip.B02	94026024	Mag2	-	-	-	-	-	-	-	-	-	-	-	-	-	-	-	-	-	Mag1	-	-	-	-	-	Mag1	-	Mag1	-	Mag1	-	Mag1	-	Mag1	-	Mag1	-	Mag1	-	-	-	-	-	-	-	-	-	-
AX-176791941	Araip.B02	94802544	Mag2	-	-	-	-	-	-	-	-	-	-	-	-	-	-	-	-	-	Mag1	-	-	-	-	-	Mag1	-	Mag1	-	Mag1	-	Mag1	-	Mag1	-	Mag1	-	Mag1	-	-	-	-	-	-	-	-	-	-
AX-147242097	Araip.B02	94962649	-	-	-	-	-	-	-	-	-	-	-	-	-	-	-	-	-	-	Mag1	-	-	-	-	-	Mag1	-	Mag1	-	Mag1	-	Mag1	-	Mag1	-	Mag1	-	Mag1	-	-	-	-	-	-	-	-	-	-
AX-176820704	Araip.B02	95335297	-	-	-	-	-	-	-	-	-	-	-	-	-	-	-	-	-	-	-	-	-	-	-	-	-	-	-	-	-	-	-	-	-	-	-	-	-	-	-	-	-	-	-	-	-	-	-
AX-147242338	Araip.B02	100393173	Mag1	-	-	-	-	-	-	-	-	-	-	-	-	-	-	-	-	-	Mag1	-	-	-	-	-	Mag1	-	Mag1	-	Mag1	-	Mag1	-	Mag1	-	Mag1	-	Mag1	-	-	-	-	-	-	-	-	-	Mag1
AX-147242383	Araip.B02	100940577	-	-	-	-	-	-	-	-	-	-	-	-	-	-	-	-	-	-	Mag1	-	-	-	-	-	Mag1	-	Mag1	-	Mag1	-	Mag1	-	Mag1	-	Mag1	-	Mag1	-	-	-	-	-	-	-	-	-	Mag1
AX-147242413	Araip.B02	101400907	Mag2	-	-	-	-	-	-	-	-	-	-	-	-	-	-	-	-	-	Mag1	-	-	-	-	-	-	-	-	-	Mag1	-	Mag1	-	Mag1	-	Mag1	-	Mag1	-	-	-	-	-	-	-	-	-	Mag1
AX-147242414	Araip.B02	101401524	Mag2	-	-	-	-	-	-	-	-	-	-	-	-	-	-	-	-	-	Mag1	-	-	-	-	-	-	-	-	-	Mag1	-	Mag1	-	Mag1	-	Mag1	-	Mag1	-	-	-	-	-	-	-	-	-	Mag1
AX-147242580	Araip.B02	103980876	Mag2	-	-	-	-	-	-	-	-	-	-	-	-	-	-	-	-	-	-	-	-	-	-	-	-	-	-	-	-	-	-	-	-	-	-	-	-	-	-	-	-	-	-	-	-	-	Mag1
AX-176791392	Araip.B02	104833813	Mag1	-	-	-	-	-	-	-	-	-	-	-	-	-	-	-	-	-	-	Mag1	-	-	-	Mag1	-	Mag1	-	-	-	-	-	-	-	Mag1	-	Mag1	-	-	Mag1	-	-	-	-	-	-	-	Mag1
AX-147242664	Araip.B02	104842996	Mag2	-	-	-	-	-	-	-	-	-	-	-	-	-	-	-	-	-	-	Mag1	-	Mag1	-	Mag2	-	Mag2	-	-	-	-	-	-	-	Mag1	-	Mag1	-	Mag1	Mag1	-	-	-	-	-	-	-	Mag1
AX-147242688	Araip.B02	105150391	Mag2	-	-	-	-	-	-	-	-	-	-	-	-	-	-	-	-	-	-	Mag1	-	Mag1	-	Mag2	-	Mag2	-	-	-	-	-	-	-	Mag1	-	Mag1	-	Mag1	Mag1	-	-	-	-	-	-	-	Mag1
AX-147242696	Araip.B02	105197496	Mag2	-	-	-	-	-	-	-	-	-	-	-	-	-	-	-	-	-	-	Mag1	-	Mag1	-	Mag2	-	Mag2	-	-	-	-	-	-	-	Mag1	-	Mag1	-	Mag1	Mag1	-	-	-	-	-	-	-	Mag1
AX-147242719	Araip.B02	105459475	Mag2	-	-	-	-	-	-	-	-	-	-	-	-	-	-	-	-	-	-	Mag1	-	Mag1	-	-	-	Mag2	-	-	-	-	-	-	-	Mag1	-	Mag1	-	Mag1	Mag1	-	-	-	-	-	-	-	Mag1
AX-147242749	Araip.B02	105777210	Mag2	-	-	-	-	-	-	-	-	-	-	-	-	-	-	-	-	-	-	Mag1	-	Mag1	-	Mag2	-	Mag2	-	-	-	-	-	-	-	Mag1	-	Mag1	-	Mag1	Mag1	-	-	-	-	-	-	-	Mag1
AX-147242782	Araip.B02	106199533	Mag2	-	-	-	-	-	-	-	-	-	-	-	-	-	-	-	-	-	-	Mag1	-	Mag1	-	Mag2	-	Mag2	-	-	-	-	-	-	-	Mag1	-	Mag1	-	Mag1	Mag1	-	-	-	-	-	-	-	Mag1
AX-147242790	Araip.B02	106275015	Mag2	-	-	-	-	-	-	-	-	-	-	-	-	-	-	-	-	-	-	Mag1	-	Mag1	-	Mag2	-	Mag2	-	-	-	-	-	-	-	Mag1	-	Mag1	-	Mag1	Mag1	-	-	-	-	-	-	-	Mag1
AX-147242801	Araip.B02	106519289	Mag2	-	-	-	-	-	-	-	-	-	-	-	-	-	-	-	-	-	-	Mag1	-	Mag1	-	Mag2	-	Mag2	-	-	-	-	-	-	-	Mag1	-	Mag1	-	Mag1	Mag1	-	-	-	-	-	-	-	Mag1
AX-147242807	Araip.B02	106733410	Mag2	-	-	-	-	-	-	-	-	-	-	-	-	-	-	-	-	-	-	Mag1	-	Mag1	-	Mag2	-	Mag2	-	-	-	-	-	-	-	Mag1	-	Mag1	-	Mag1	Mag1	-	-	-	-	-	-	-	Mag1
AX-147242840	Araip.B02	108129417	Mag1	-	-	-	-	-	-	-	-	-	-	-	-	-	-	-	-	-	-	Mag1	-	-	-	Mag1	-	Mag1	-	-	-	-	-	-	-	Mag1	-	Mag1	-	-	Mag1	-	-	-	-	-	-	-	Mag1
AX-147215246	Araip.B02	108210066	Mag1	-	-	-	-	-	-	-	-	-	-	-	-	-	-	-	-	-	-	Mag1	-	-	-	Mag1	-	Mag1	-	-	-	-	-	-	-	-	-	-	-	Mag1	Mag1	-	-	-	-	-	-	-	-
AX-147242994	Araip.B03	1844786	Mag2	-	-	-	-	-	-	-	-	-	-	-	-	-	-	-	-	-	-	-	-	-	-	-	-	-	-	-	-	-	-	-	-	-	-	-	-	-	-	-	-	-	-	-	-	-	-
AX-147243021	Araip.B03	2002905	Mag2	-	-	-	-	-	-	-	-	-	-	-	-	-	-	-	-	-	-	-	-	-	Mag1	-	-	-	-	-	-	-	-	-	-	-	-	-	-	-	-	-	-	-	-	-	-	-	-
AX-147243043	Araip.B03	2173533	Mag2	-	-	-	-	-	-	-	-	-	-	-	-	-	-	-	-	-	-	-	-	-	-	-	-	-	-	-	-	-	-	-	-	-	-	-	-	-	-	-	-	-	-	-	-	-	-
AX-147243165	Araip.B03	3534132	Mag1	-	-	-	-	-	-	-	-	-	-	-	-	-	-	-	-	-	-	-	-	-	-	-	-	-	-	-	-	-	-	-	-	-	-	-	-	-	-	-	-	-	-	-	-	-	-
AX-147243191	Araip.B03	3923135	Mag1	-	-	-	-	-	-	-	-	-	-	-	-	-	-	-	-	-	-	-	-	-	-	-	-	-	-	-	-	-	-	-	-	-	-	-	-	-	-	-	-	-	-	-	-	-	-
AX-147243304	Araip.B03	5774708	Mag1	-	-	-	-	-	-	-	-	-	-	-	-	-	-	-	-	-	-	-	-	-	-	-	-	-	-	-	-	-	-	-	-	-	-	-	-	-	-	-	-	-	-	-	-	-	-
AX-147243420	Araip.B03	7235023	Mag1	-	-	-	-	-	-	-	-	-	-	-	-	-	-	-	-	-	-	-	-	-	-	-	-	-	-	-	-	-	-	-	-	-	-	-	-	-	-	-	-	-	-	-	-	-	-
AX-147243421	Araip.B03	7237477	Mag1	-	-	-	-	-	-	-	-	-	-	-	-	-	-	-	-	-	-	-	-	-	-	-	-	-	-	-	-	-	-	-	-	-	-	-	-	-	-	-	-	-	-	-	-	-	-
AX-176791651	Araip.B03	10215136	Mag1	-	-	-	-	-	-	-	-	-	-	-	-	-	-	-	-	-	-	-	-	-	-	-	-	-	-	-	-	-	-	-	-	-	-	-	-	-	-	-	-	-	-	-	-	-	-
AX-176791793	Araip.B03	10618789	Mag1	-	-	-	-	-	-	-	-	-	-	-	-	-	-	-	-	-	-	-	-	-	Mag1	-	-	-	-	-	-	-	-	-	-	-	-	-	-	-	-	-	-	-	-	-	-	-	-
AX-147243598	Araip.B03	10801811	Mag1	-	-	-	-	-	-	-	-	-	-	-	-	-	-	-	-	-	-	-	-	-	-	-	-	-	-	-	-	-	-	-	-	-	-	-	-	-	-	-	-	-	-	-	-	-	-
AX-147243624	Araip.B03	11071662	Mag1	-	-	-	-	-	-	-	-	-	-	-	-	-	-	-	-	-	-	-	-	-	-	-	-	-	-	-	-	-	-	-	-	-	-	-	-	-	-	-	-	-	-	-	-	-	-
AX-176793125	Araip.B03	11238410	-	-	-	-	-	-	-	-	-	-	-	-	-	-	-	-	-	-	-	-	-	-	-	-	-	-	-	-	-	-	-	-	-	-	-	-	-	-	-	-	-	-	-	-	-	-	-
AX-147243671	Araip.B03	11870558	Mag1	-	-	-	-	-	-	-	-	-	-	-	-	-	-	-	-	-	-	-	-	-	-	-	-	-	-	-	-	-	-	-	-	-	-	-	-	-	-	-	-	-	-	-	-	-	-
AX-147243690	Araip.B03	12102407	Mag1	-	-	-	-	-	-	-	-	-	-	-	-	-	-	-	-	-	-	-	-	-	-	-	-	-	-	-	-	-	-	-	-	-	-	-	-	-	-	-	-	-	-	-	-	-	-
AX-147243715	Araip.B03	12411110	Mag1	-	-	-	-	-	-	-	-	-	-	-	-	-	-	-	-	-	-	-	-	-	-	-	-	-	-	-	-	-	-	-	-	-	-	-	-	-	-	-	-	-	-	-	-	-	-
AX-147243797	Araip.B03	13781428	Mag1	-	-	-	-	-	-	-	-	-	-	-	-	-	-	-	-	-	-	-	-	-	-	-	-	-	-	-	-	-	-	-	-	-	-	-	-	-	-	-	-	-	-	-	-	-	-
AX-147243906	Araip.B03	16162415	Mag1	-	-	-	-	-	-	-	-	-	-	-	-	-	-	-	-	-	-	-	-	-	-	-	-	-	-	-	-	-	-	-	-	-	-	-	-	-	-	-	-	-	-	-	-	-	-
AX-147214870	Araip.B03	16566657	Mag1	-	-	-	-	-	-	-	-	-	-	Mag1	-	-	-	-	-	-	Mag1	-	-	-	-	-	Mag1	-	-	-	-	-	Mag1	-	Mag1	-	Mag1	-	Mag1	-	-	-	-	-	-	-	-	-	Mag1
AX-147243940	Araip.B03	17234049	Mag1	-	-	-	-	-	-	-	-	-	-	-	-	-	-	-	-	-	-	-	-	-	-	-	-	-	-	-	-	-	-	-	-	-	-	-	-	-	-	-	-	-	-	-	-	-	-
AX-176806565	Araip.B03	22307354	Mag1	-	-	-	-	-	-	-	-	-	-	-	-	-	-	-	-	-	-	-	-	-	-	-	-	-	-	-	-	-	-	-	-	-	-	-	-	-	-	-	-	-	-	-	-	-	-
AX-176801528	Araip.B03	22308023	Mag2	-	-	-	-	-	-	-	-	-	-	-	-	-	-	-	-	-	-	-	-	-	-	-	-	-	-	-	-	-	-	-	-	-	-	-	-	-	-	-	-	-	-	-	-	-	-
AX-176796172	Araip.B03	22308147	-	-	-	-	-	-	-	-	-	-	-	-	-	-	-	-	-	-	-	-	-	-	-	-	-	-	-	-	-	-	-	-	-	-	-	-	-	-	-	-	-	-	-	-	-	-	-
AX-176805906	Araip.B03	22308199	Mag2	-	-	-	-	-	-	-	-	-	-	-	-	-	-	-	-	-	-	-	-	-	Mag1	-	-	-	-	-	-	-	-	-	-	-	-	-	-	-	-	-	-	-	-	-	-	-	-
AX-176809312	Araip.B03	22308225	Mag1	-	-	-	-	-	-	-	-	-	-	-	-	-	-	-	-	-	-	-	-	-	-	-	-	-	-	-	-	-	-	-	-	-	-	-	-	-	-	-	-	-	-	-	-	-	-
AX-176801202	Araip.B03	22308280	Mag1	-	-	-	-	-	-	-	-	-	-	-	-	-	-	-	-	-	-	-	-	-	-	-	-	-	-	-	-	-	-	-	-	-	-	-	-	-	-	-	-	-	-	-	-	-	-
AX-176806119	Araip.B03	22308501	Mag1	-	-	-	-	-	-	-	-	-	-	-	-	-	-	-	-	-	-	-	-	-	-	-	-	-	-	-	-	-	-	-	-	-	-	-	-	-	-	-	-	-	-	-	-	-	-
AX-176813244	Araip.B03	22308532	Mag1	-	-	-	-	-	-	-	-	-	-	-	-	-	-	-	-	-	-	-	-	-	-	-	-	-	-	-	-	-	-	-	-	-	-	-	-	-	-	-	-	-	-	-	-	-	-
AX-147244223	Araip.B03	26778841	Mag1	-	-	-	-	-	-	-	-	-	-	-	-	-	-	-	-	-	-	-	-	-	-	-	-	-	-	-	-	-	-	-	-	-	-	-	-	-	-	-	-	-	-	-	-	-	-
AX-176807784	Araip.B03	27434627	Mag1	-	Mag1	Mag1	-	-	Mag1	Mag1	-	Mag1	-	-	-	-	Mag1	Mag1	Mag1	Mag1	-	Mag1	-	Mag1	-	Mag1	-	Mag1	-	Mag1	-	-	-	-	-	Mag1	Mag1	Mag1	Mag1	-	-	Mag1	-	Mag1	-	-	-	-	Mag1
AX-147244257	Araip.B03	28239980	Mag1	-	-	-	-	-	-	-	-	-	-	-	-	-	-	-	-	-	-	-	-	-	-	-	-	-	-	-	-	-	-	-	-	-	-	-	-	-	-	-	-	-	-	-	-	-	-
AX-147244318	Araip.B03	30318550	Mag1	-	-	-	-	-	-	-	-	-	-	-	-	-	-	-	-	-	-	-	-	-	-	-	-	-	-	-	-	-	-	-	-	-	-	-	-	-	-	-	-	-	-	-	-	-	-
AX-147244327	Araip.B03	30554661	Mag1	-	-	-	-	-	-	-	-	-	-	-	-	-	-	-	-	-	-	-	-	-	-	-	-	-	-	-	-	-	-	-	-	-	-	-	-	-	-	-	-	-	-	-	-	-	-
AX-176811706	Araip.B03	35762650	Mag1	-	-	-	-	-	-	-	-	-	-	-	-	-	-	-	-	-	-	-	-	-	-	-	-	-	-	-	-	-	-	-	-	-	-	-	-	-	-	-	-	-	-	-	-	-	-
AX-147244439	Araip.B03	36081439	Mag1	-	-	-	-	-	-	-	-	-	-	-	-	-	-	-	-	-	-	-	-	-	-	-	-	-	-	-	-	-	-	-	-	-	-	-	-	-	-	-	-	-	-	-	-	-	-
AX-147244469	Araip.B03	37156167	Mag1	-	-	-	-	-	-	-	-	-	-	-	-	-	-	-	-	-	-	-	-	-	-	-	-	-	-	-	-	-	-	-	-	-	-	-	-	-	-	-	-	-	-	-	-	-	-
AX-176816891	Araip.B03	38150784	-	-	-	-	-	-	-	-	-	-	-	-	-	-	-	-	-	-	-	-	-	-	-	-	-	-	-	-	-	-	-	-	-	-	-	-	-	-	-	-	-	-	-	-	-	-	-
AX-147244572	Araip.B03	45132180	Mag1	-	-	-	-	-	-	-	-	-	-	-	-	-	-	-	-	-	-	-	-	-	-	-	-	-	-	-	-	-	-	-	-	-	-	-	-	-	-	-	-	-	-	-	-	-	-
AX-177642071	Araip.B03	66310678	Mag1	-	-	-	-	-	-	-	-	-	-	-	-	-	-	-	-	-	-	-	-	-	-	-	-	-	-	-	-	-	-	-	-	-	-	-	-	-	-	-	-	-	-	-	-	-	-
AX-176814342	Araip.B03	106248333	Mag2	Mag2	Mag2	Mag2	Mag2	Mag2	Mag2	Mag2	Mag2	Mag2	Mag2	Mag2	Mag2	Mag2	Mag2	Mag2	Mag2	Mag2	Mag2	Mag2	Mag2	Mag2	Mag2	Mag2	Mag2	Mag2	Mag2	Mag2	Mag2	Mag2	Mag2	Mag2	Mag2	Mag2	Mag2	Mag2	Mag2	Mag2	Mag2	Mag2	Mag2	Mag2	Mag2	Mag2	Mag2	Mag2	Mag2
AX-147245171	Araip.B03	117848795	Mag2	-	-	-	-	-	-	-	-	-	-	-	-	-	-	-	-	-	-	-	-	-	-	-	-	-	-	-	-	-	-	-	-	-	-	-	-	-	-	-	-	-	-	-	-	-	-
AX-147245258	Araip.B03	120052892	-	-	-	-	-	-	-	-	-	-	-	-	-	-	-	-	-	-	-	-	-	-	-	-	-	-	-	-	-	-	-	-	-	-	-	-	-	-	-	-	-	-	-	-	-	-	-
AX-147245263	Araip.B03	120120121	Mag2	-	-	-	-	-	-	-	-	-	-	-	-	-	-	-	-	-	-	-	-	-	-	-	-	-	-	-	-	-	-	-	-	-	-	-	-	-	-	-	-	-	-	-	-	-	-
AX-176792179	Araip.B03	120236635	Mag2	-	-	-	-	-	-	-	-	-	-	-	-	-	-	-	-	-	-	-	-	-	-	-	-	-	-	-	-	-	-	-	-	-	-	-	-	-	-	-	-	-	-	-	-	-	-
AX-147245309	Araip.B03	121027376	Mag2	-	-	-	-	-	-	-	-	-	-	-	-	-	-	-	-	-	-	-	-	-	-	-	-	-	-	-	-	-	-	-	-	-	-	-	-	-	-	-	-	-	-	-	-	-	-
AX-147245336	Araip.B03	121303111	Mag2	-	-	-	-	-	-	-	-	-	-	-	-	-	-	-	-	-	-	-	-	-	-	-	-	-	-	-	-	-	-	-	-	-	-	-	-	-	-	-	-	-	-	-	-	-	-
AX-147245392	Araip.B03	122191218	Mag1	-	-	-	-	-	-	-	-	-	-	-	-	-	-	-	-	-	-	-	-	-	-	-	-	-	-	-	-	-	-	-	-	-	-	-	-	-	-	-	-	-	-	-	-	-	-
AX-147245394	Araip.B03	122239376	Mag2	-	-	-	-	-	-	-	-	-	-	-	-	-	-	-	-	-	-	-	-	-	-	-	-	-	-	-	-	-	-	-	-	-	-	-	-	-	-	-	-	-	-	-	-	-	-
AX-147245419	Araip.B03	122885412	Mag2	-	-	-	-	-	-	-	-	-	-	-	-	-	-	-	-	-	-	-	-	-	Mag1	-	-	-	-	-	-	-	-	-	-	-	-	-	-	-	-	-	-	-	-	-	-	-	-
AX-176813056	Araip.B03	123605071	Mag1	-	-	-	-	-	-	-	-	-	-	-	-	-	-	-	-	-	-	-	-	-	-	-	-	-	-	-	-	-	-	-	-	-	-	-	-	-	-	-	-	-	-	-	-	-	-
AX-147245500	Araip.B03	124672923	Mag1	-	-	-	-	-	-	-	-	-	-	-	-	-	-	-	-	-	-	-	-	-	-	-	-	-	-	-	-	-	-	-	-	-	-	-	-	-	-	-	-	-	-	-	-	-	-
AX-147245502	Araip.B03	124680620	-	-	-	-	-	-	-	-	-	-	-	-	-	-	-	-	-	-	-	-	-	-	-	-	-	-	-	-	-	-	-	-	-	-	-	-	-	-	-	-	-	-	-	-	-	-	-
AX-147245544	Araip.B03	125148566	Mag1	-	-	-	-	-	-	-	-	-	-	-	-	-	-	-	-	-	-	-	-	-	-	-	-	-	-	-	-	-	-	-	-	-	-	-	-	-	-	-	-	-	-	-	-	-	-
AX-147245545	Araip.B03	125151253	Mag1	-	-	-	-	-	-	-	-	-	-	-	-	-	-	-	-	-	-	-	-	-	-	-	-	-	-	-	-	-	-	-	-	-	-	-	-	-	-	-	-	-	-	-	-	-	-
AX-176791887	Araip.B03	126294568	Mag1	-	-	-	-	-	-	-	-	-	-	-	-	-	-	-	-	-	-	-	-	-	-	-	-	-	-	-	-	-	-	-	-	-	-	-	-	-	-	-	-	-	-	-	-	-	-
AX-147245793	Araip.B03	128560560	-	-	-	-	-	-	-	-	-	-	-	-	-	-	-	-	-	-	-	-	-	-	-	-	-	-	-	-	-	-	-	-	-	-	-	-	-	-	-	-	-	-	-	-	-	-	-
AX-147245802	Araip.B03	128603379	-	-	-	-	-	-	-	-	-	-	-	-	-	-	-	-	-	-	-	-	-	-	-	-	-	-	-	-	-	-	-	-	-	-	-	-	-	-	-	-	-	-	-	-	-	-	-
AX-176791753	Araip.B03	128907556	Mag1	-	-	-	-	-	-	-	-	-	-	-	-	-	-	-	-	-	-	-	-	-	-	-	-	-	-	-	-	-	-	-	-	-	-	-	-	-	-	-	-	-	-	-	-	-	-
AX-147218217	Araip.B03	129421349	Mag1	-	-	-	-	-	-	-	-	-	-	-	-	-	-	-	-	-	-	-	-	-	-	-	-	-	-	-	-	-	-	-	-	-	-	-	-	-	-	-	-	-	-	-	-	-	-
AX-176791517	Araip.B03	129787316	-	-	-	-	-	-	-	-	-	-	-	-	-	-	-	-	-	-	-	-	-	-	-	-	-	-	-	-	-	-	-	-	-	-	-	-	-	-	-	-	-	-	-	-	-	-	-
AX-147245896	Araip.B03	129791576	-	-	-	-	-	-	-	-	-	-	-	-	-	-	-	-	-	-	-	-	-	-	-	-	-	-	-	-	-	-	-	-	-	-	-	-	-	-	-	-	-	-	-	-	-	-	-
AX-147245901	Araip.B03	129827547	Mag1	-	-	-	-	-	-	-	-	-	-	-	-	-	-	-	-	-	-	-	-	-	-	-	-	-	-	-	-	-	-	-	-	-	-	-	-	-	-	-	-	-	-	-	-	-	-
AX-147245940	Araip.B03	130286855	Mag1	-	-	-	-	-	-	-	-	-	-	-	-	-	-	-	-	-	-	-	-	-	-	-	-	-	-	-	-	-	-	-	-	-	-	-	-	-	-	-	-	-	-	-	-	-	-
AX-147245966	Araip.B03	130622484	-	-	-	-	-	-	-	-	-	-	-	-	-	-	-	-	-	-	-	-	-	-	-	-	-	-	-	-	-	-	-	-	-	-	-	-	-	-	-	-	-	-	-	-	-	-	-
AX-147218333	Araip.B03	130873990	-	Mag2	Mag2	Mag2	Mag2	Mag2	Mag2	Mag2	Mag2	Mag2	Mag2	Mag2	Mag2	Mag2	Mag2	Mag2	Mag2	Mag2	Mag2	Mag2	Mag2	Mag2	Mag2	Mag2	Mag2	Mag2	Mag2	Mag2	Mag2	Mag2	Mag2	Mag2	Mag2	Mag2	Mag2	Mag2	Mag2	Mag2	Mag2	Mag2	Mag2	Mag2	Mag2	Mag2	Mag2	Mag2	Mag2
AX-147246077	Araip.B03	132012119	-	-	-	-	-	-	-	-	-	-	-	-	-	-	-	-	-	-	-	-	-	-	-	-	-	-	-	-	-	-	-	-	-	-	-	-	-	-	-	-	-	-	-	-	-	-	-
AX-147246079	Araip.B03	132032257	Mag1	-	-	-	-	-	-	-	-	-	-	-	-	-	-	-	-	-	-	-	-	-	-	-	-	-	-	-	-	-	-	-	-	-	-	-	-	-	-	-	-	-	-	-	-	-	-
AX-147246130	Araip.B03	132749247	Mag2	-	-	-	-	-	-	-	-	-	-	-	-	-	-	-	-	-	-	-	-	-	-	-	-	-	-	-	-	-	-	-	-	-	-	-	-	-	-	-	-	-	-	-	-	-	-
AX-147246147	Araip.B03	133020199	-	-	-	-	-	-	-	-	-	-	-	-	-	-	-	-	-	-	-	-	-	-	-	-	-	-	-	-	-	-	-	-	-	-	-	-	-	-	-	-	-	-	-	-	-	-	-
AX-147218491	Araip.B03	133159344	Mag1	-	-	-	-	-	-	-	-	-	-	-	-	-	-	-	-	-	-	-	-	-	-	-	-	-	-	-	-	-	-	-	-	-	-	-	-	-	-	-	-	-	-	-	-	-	-
AX-147246163	Araip.B03	133161275	Mag2	-	-	-	-	-	-	-	-	-	-	-	-	-	-	-	-	-	-	-	-	-	-	-	-	-	-	-	-	-	-	-	-	-	-	-	-	-	-	-	-	-	-	-	-	-	-
AX-176802986	Araip.B03	133487997	-	-	-	-	-	-	-	-	-	-	-	-	-	-	-	-	-	-	-	-	-	-	-	-	-	-	-	-	-	-	-	-	-	-	-	-	-	-	-	-	-	-	-	-	-	-	-
AX-147246176	Araip.B03	133622000	Mag1	-	-	-	-	-	-	-	-	-	-	-	-	-	-	-	-	-	-	-	-	-	-	-	-	-	-	-	-	Mag1	-	Mag1	-	-	-	-	-	Mag1	-	-	-	-	-	-	-	-	-
AX-176791415	Araip.B03	134088509	Mag1	-	-	-	-	-	-	-	-	-	-	-	-	-	-	-	-	-	-	-	-	-	-	-	-	-	-	-	-	-	-	-	-	-	-	-	-	-	-	-	-	-	-	-	-	-	-
AX-147246215	Araip.B03	134096690	-	-	-	-	-	-	-	-	-	-	-	-	-	-	-	-	-	-	-	-	-	-	-	-	-	-	-	-	-	-	-	-	-	-	-	-	-	-	-	-	-	-	-	-	-	-	-
AX-176791476	Araip.B03	135810780	Mag1	-	-	-	-	-	-	-	-	-	-	-	-	-	-	-	-	-	-	-	-	-	-	-	-	-	-	-	-	-	-	-	-	-	-	-	-	-	-	-	-	-	-	-	-	-	-
AX-147246324	Araip.B03	135984987	Mag2	-	-	-	-	-	-	-	-	-	-	-	-	-	-	-	-	-	-	-	-	-	-	-	-	-	-	-	-	-	-	-	-	-	-	-	-	-	-	-	-	-	-	-	-	-	-
AX-147246335	Araip.B04	108033	Mag1	-	-	-	-	-	-	-	-	-	-	-	-	-	-	-	-	-	-	-	-	-	-	-	-	-	-	-	-	-	-	-	-	-	-	-	-	-	-	-	-	-	-	-	-	-	-
AX-147246340	Araip.B04	139558	Mag1	-	-	-	-	-	-	-	-	-	-	-	-	-	-	-	-	-	-	-	-	-	-	-	-	-	-	-	-	-	-	-	-	-	-	-	-	-	-	-	-	-	-	-	-	-	-
AX-147246344	Araip.B04	154459	Mag1	-	-	-	-	-	-	-	-	-	-	-	-	-	-	-	-	-	-	-	-	-	-	-	-	-	-	-	-	-	-	-	-	-	-	-	-	-	-	-	-	-	-	-	-	-	-
AX-147246396	Araip.B04	567593	Mag1	-	-	-	-	-	-	-	-	-	-	-	-	-	-	-	-	-	-	-	-	-	-	-	-	-	-	-	-	-	-	-	-	-	-	-	-	-	-	-	-	-	-	-	-	-	-
AX-147246418	Araip.B04	738551	Mag1	-	-	-	-	-	-	-	-	-	-	-	-	-	-	-	-	-	-	-	-	-	-	-	-	-	-	-	-	-	-	-	-	-	-	-	-	-	-	-	-	-	-	-	-	-	-
AX-147246427	Araip.B04	831468	Mag1	-	-	-	-	-	-	-	-	-	-	-	-	-	-	-	-	-	-	-	-	-	-	-	-	-	-	-	-	-	-	-	-	-	-	-	-	-	-	-	-	-	-	-	-	-	-
AX-147246442	Araip.B04	950386	Mag1	-	-	-	-	-	-	-	-	-	-	-	-	-	-	-	-	-	-	-	-	-	-	-	-	-	-	-	-	-	-	-	-	-	-	-	-	-	-	-	-	-	-	-	-	-	-
AX-147246473	Araip.B04	1293630	Mag1	-	-	-	-	-	-	-	-	-	-	-	-	-	-	-	-	-	-	-	-	-	-	-	-	-	-	-	-	-	-	-	-	-	-	-	-	-	-	-	-	-	-	-	-	-	-
AX-147246474	Araip.B04	1299815	Mag1	-	-	-	-	-	-	-	-	-	-	-	-	-	-	-	-	-	-	-	-	-	-	-	-	-	-	-	-	-	-	-	-	-	-	-	-	-	-	-	-	-	-	-	-	-	-
AX-147246479	Araip.B04	1329408	Mag1	-	-	-	-	-	-	-	-	-	-	-	-	-	-	-	-	-	-	-	-	-	-	-	-	-	-	-	-	-	-	-	-	-	-	-	-	-	-	-	-	-	-	-	-	-	-
AX-147246506	Araip.B04	1577720	Mag1	-	-	-	-	-	-	-	-	-	-	-	-	-	-	-	-	-	-	-	-	-	-	-	-	-	-	-	-	-	-	-	-	-	-	-	-	-	-	-	-	-	-	-	-	-	-
AX-147246565	Araip.B04	1896694	Mag1	-	-	-	-	-	-	-	-	-	-	-	-	-	-	-	-	-	-	-	-	-	-	-	-	-	-	-	-	-	-	-	-	-	-	-	-	-	-	-	-	-	-	-	-	-	-
AX-147246575	Araip.B04	2132527	Mag1	-	-	-	-	-	-	-	-	-	-	-	-	-	-	-	-	-	-	-	-	-	-	-	-	-	-	-	-	-	-	-	-	-	-	-	-	-	-	-	-	-	-	-	-	-	-
AX-147246619	Araip.B04	2577948	Mag1	-	-	-	-	-	-	-	-	-	-	-	-	-	-	-	-	-	-	-	-	-	-	-	-	-	-	-	-	-	-	-	-	-	-	-	-	-	-	-	-	-	-	-	-	-	-
AX-147246629	Araip.B04	2661110	Mag1	-	-	-	-	-	-	-	-	-	-	-	-	-	-	-	-	-	-	-	-	-	-	-	-	-	-	-	-	-	-	-	-	-	-	-	-	-	-	-	-	-	-	-	-	-	-
AX-147246667	Araip.B04	3594667	Mag1	-	-	-	-	-	-	-	-	-	-	-	-	-	-	-	-	-	-	-	-	-	-	-	-	-	-	-	-	-	-	-	-	-	-	-	-	-	-	-	-	-	-	-	-	-	-
AX-147246706	Araip.B04	4073276	Mag1	-	-	-	-	-	-	-	-	-	-	-	-	-	-	-	-	-	-	-	-	-	-	-	-	-	-	-	-	-	-	-	-	-	-	-	-	-	-	-	-	-	-	-	-	-	-
AX-147246712	Araip.B04	4128457	Mag1	-	-	-	-	-	-	-	-	-	-	-	-	-	-	-	-	-	-	-	-	-	-	-	-	-	-	-	-	-	-	-	-	-	-	-	-	-	-	-	-	-	-	-	-	-	-
AX-176817554	Araip.B04	4351489	Mag1	-	-	-	-	-	-	-	-	-	-	-	-	-	-	-	-	-	-	-	-	-	-	-	-	-	-	-	-	-	-	-	-	-	-	-	-	-	-	-	-	-	-	-	-	-	-
AX-176796801	Araip.B04	4783093	-	-	-	-	-	-	-	-	-	-	-	-	-	-	-	-	-	-	-	-	-	-	-	-	-	-	-	-	-	-	-	-	-	-	-	-	-	-	-	-	-	-	-	-	-	-	-
AX-147246812	Araip.B04	5008643	Mag1	-	-	-	-	-	-	-	-	-	-	-	-	-	-	-	-	-	-	-	-	-	-	-	-	-	-	-	-	-	-	-	-	-	-	-	-	-	-	-	-	-	-	-	-	-	-
AX-147246909	Araip.B04	6170633	Mag1	-	-	-	-	-	-	-	-	-	-	-	-	-	-	-	-	-	-	-	-	-	-	-	-	-	-	-	-	-	-	-	-	-	-	-	-	-	-	-	-	-	-	-	-	-	-
AX-147246929	Araip.B04	6798332	Mag1	-	-	-	-	-	-	-	-	-	-	-	-	-	-	-	-	-	-	-	-	-	-	-	-	-	-	-	-	-	-	-	-	-	-	-	-	-	-	-	-	-	-	-	-	-	-
AX-147247055	Araip.B04	10014007	Mag1	-	-	-	-	-	-	-	-	-	-	-	-	-	-	-	-	-	-	-	-	-	-	-	-	-	-	-	-	-	-	-	-	-	-	-	-	-	-	-	-	-	-	-	-	-	-
AX-147247100	Araip.B04	10864018	Mag1	-	-	-	-	-	-	-	-	-	-	-	-	-	-	-	-	-	-	-	-	-	-	-	-	-	-	-	-	-	-	-	-	-	-	-	-	-	-	-	-	-	-	-	-	-	-
AX-147247147	Araip.B04	12990543	Mag2	-	-	Mag1	-	Mag1	Mag1	Mag1	-	Mag2	-	-	Mag1	Mag2	Mag1	Mag2	-	-	Mag1	Mag1	Mag1	-	Mag1	Mag2	Mag1	Mag2	Mag1	Mag1	Mag2	Mag1	Mag1	Mag1	-	Mag1	Mag1	-	-	Mag2	Mag2	Mag1	Mag2	Mag1	-	Mag1	Mag2	Mag1	Mag1
AX-147247234	Araip.B04	15336380	Mag1	-	-	-	-	-	-	-	-	-	-	-	-	-	-	-	-	-	-	-	-	-	-	-	-	-	-	-	-	-	-	-	-	-	-	-	-	-	-	-	-	-	-	-	-	-	-
AX-176815860	Araip.B04	17372661	Mag1	-	-	-	-	-	-	-	-	-	-	-	-	-	-	-	-	-	-	-	-	-	-	-	-	-	-	-	-	-	-	-	-	-	-	-	-	-	-	-	-	-	-	-	-	-	-
AX-176823480	Araip.B04	19520056	Mag1	-	-	-	-	-	-	-	-	-	-	-	-	-	-	-	-	-	-	-	-	-	-	-	-	-	-	-	-	-	-	-	-	-	-	-	-	-	-	-	-	-	-	-	-	-	-
AX-147247355	Araip.B04	20541889	Mag1	-	-	-	-	-	-	-	-	-	-	-	-	-	-	-	-	-	-	-	-	-	-	-	-	-	-	-	-	-	-	-	-	-	-	-	-	-	-	-	-	-	-	-	-	-	-
AX-176818536	Araip.B04	20935984	-	-	-	-	-	-	-	-	-	-	-	-	-	-	-	-	-	-	-	-	-	-	-	-	-	-	-	-	-	-	-	-	-	-	-	-	-	-	-	-	-	-	-	-	-	-	-
AX-176797382	Araip.B04	34935506	Mag2	-	-	-	-	-	-	-	-	-	-	-	-	-	-	-	-	-	-	-	-	-	-	-	-	-	-	-	-	-	-	-	-	-	-	-	-	-	-	-	-	-	-	-	-	-	-
AX-147247551	Araip.B04	38793402	Mag1	-	-	-	-	-	-	-	-	-	-	-	-	-	-	-	-	-	-	-	-	-	-	-	-	-	-	-	-	-	-	-	-	-	-	-	-	-	-	-	-	-	-	-	-	-	-
AX-147247579	Araip.B04	40080312	Mag1	-	-	-	-	-	-	-	-	-	-	-	-	-	-	-	-	-	-	-	-	-	-	-	-	-	-	-	-	-	-	-	-	-	-	-	-	-	-	-	-	-	-	-	-	-	-
AX-176798259	Araip.B04	42755749	-	-	-	-	-	-	-	-	-	-	-	-	-	-	-	-	-	-	-	-	-	-	-	-	-	-	-	-	-	-	-	-	-	-	-	-	-	-	-	-	-	-	-	-	-	-	-
AX-147219973	Araip.B04	43622573	Mag1	-	-	-	-	-	-	-	-	-	-	-	-	-	-	-	-	-	-	-	-	-	-	-	-	-	-	-	-	-	-	-	-	-	-	-	-	-	-	-	-	-	-	-	-	-	-
AX-147247606	Araip.B04	45421724	Mag1	-	-	-	-	-	-	-	-	-	-	-	-	-	-	-	-	-	-	-	-	-	-	-	-	-	-	-	-	-	-	-	-	-	-	-	-	-	-	-	-	-	-	-	-	-	-
AX-147220004	Araip.B04	45422517	Mag1	-	-	-	-	-	-	-	-	-	-	-	-	-	-	-	-	-	-	-	-	-	-	-	-	-	-	-	-	-	-	-	-	-	-	-	-	-	-	-	-	-	-	-	-	-	-
AX-147220005	Araip.B04	45422672	Mag1	-	-	-	-	-	-	-	-	-	-	-	-	-	-	-	-	-	-	-	-	-	-	-	-	-	-	-	-	-	-	-	-	-	-	-	-	-	-	-	-	-	-	-	-	-	-
AX-147247607	Araip.B04	45423078	Mag1	-	-	-	-	-	-	-	-	-	-	-	-	-	-	-	-	-	-	-	-	-	-	-	-	-	-	-	-	-	-	-	-	-	-	-	-	-	-	-	-	-	-	-	-	-	-
AX-147247691	Araip.B04	76641591	Mag1	-	-	-	-	-	-	-	-	-	-	-	-	-	-	-	-	-	-	-	-	-	-	-	-	-	-	-	-	-	-	-	-	-	-	-	-	-	-	-	-	-	-	-	-	-	-
AX-147247711	Araip.B04	79235950	Mag1	-	-	-	-	-	-	-	-	-	-	-	-	-	-	-	-	-	-	-	-	-	-	-	-	-	-	-	-	-	-	-	-	-	-	-	-	-	-	-	-	-	-	-	-	-	-
AX-176809073	Araip.B04	84200538	Mag1	-	-	-	-	-	-	-	-	Mag1	-	-	-	-	-	Mag1	-	-	-	-	-	-	-	-	-	Mag1	-	-	-	-	-	-	-	-	-	-	-	Mag1	Mag1	-	Mag1	-	-	-	Mag1	-	-
AX-147247754	Araip.B04	88922860	Mag1	-	-	-	-	-	-	-	-	-	-	-	-	-	-	-	-	-	-	-	-	-	-	-	-	-	-	-	-	-	-	-	-	-	-	-	-	-	-	-	-	-	-	-	-	-	-
AX-147247791	Araip.B04	96086306	Mag1	-	-	-	-	-	-	-	-	-	-	-	-	-	-	-	-	-	-	-	-	-	-	-	-	-	-	-	-	-	-	-	-	-	-	-	-	-	-	-	-	-	-	-	-	-	-
AX-147220277	Araip.B04	96423370	Mag1	-	-	-	-	-	-	-	-	-	-	-	-	-	-	-	-	-	-	-	-	-	Mag1	-	-	-	-	-	-	-	-	-	-	-	-	-	-	-	-	-	-	-	-	-	-	-	-
AX-147247817	Araip.B04	97614520	Mag1	-	-	-	-	-	-	-	-	-	-	-	-	-	-	-	-	-	-	-	-	-	-	-	-	-	-	-	-	-	-	-	-	-	-	-	-	-	-	-	-	-	-	-	-	-	-
AX-147247826	Araip.B04	98054862	Mag1	-	-	-	-	-	-	-	-	-	-	-	-	-	-	-	-	-	-	-	-	-	-	-	-	-	-	-	-	-	-	-	-	-	-	-	-	-	-	-	-	-	-	-	-	-	-
AX-176795269	Araip.B04	103558555	Mag1	-	-	-	-	-	-	-	-	-	-	-	-	-	-	-	-	-	-	-	-	-	-	-	-	-	-	-	-	-	-	-	-	-	-	-	-	-	-	-	-	-	-	-	-	-	-
AX-147220398	Araip.B04	107125860	Mag1	-	-	-	-	-	-	-	-	-	-	-	-	-	-	-	-	-	-	-	-	-	-	-	-	-	-	-	-	-	-	-	-	-	-	-	-	-	-	-	-	-	-	-	-	-	-
AX-176802565	Araip.B04	108204387	-	-	-	-	-	-	-	-	-	-	-	-	-	-	-	-	-	-	-	-	-	-	-	-	-	-	-	-	-	-	-	-	-	-	-	-	-	-	-	-	-	-	-	-	-	-	-
AX-147247971	Araip.B04	108285321	Mag1	-	-	-	-	-	-	-	-	-	-	-	-	-	-	-	-	-	-	-	-	-	-	-	-	-	-	-	-	-	-	-	-	-	-	-	-	-	-	-	-	-	-	-	-	-	-
AX-176795181	Araip.B04	110717863	Mag1	-	-	-	-	-	-	-	-	-	-	-	-	-	-	-	-	-	-	-	-	-	-	-	-	-	-	-	-	-	-	-	-	-	-	-	-	-	-	-	-	-	-	-	-	-	-
AX-176795188	Araip.B04	110927436	Mag1	-	-	-	-	-	-	-	-	-	-	-	-	-	-	-	-	-	-	-	-	-	-	-	-	-	-	-	-	-	-	-	-	-	-	-	-	-	-	-	-	-	-	-	-	-	-
AX-176799696	Araip.B04	112001123	Mag1	-	-	-	-	-	-	-	-	-	-	-	-	-	-	-	-	-	-	-	-	-	-	-	-	-	-	-	-	-	-	-	-	-	-	-	-	-	-	-	-	-	-	-	-	-	-
AX-147248086	Araip.B04	113985561	Mag1	-	-	-	-	-	-	-	-	-	-	-	-	-	-	-	-	-	-	-	-	-	-	-	-	-	-	-	-	-	-	-	-	-	-	-	-	-	-	-	-	-	-	-	-	-	-
AX-147248092	Araip.B04	114111356	Mag1	-	-	-	-	-	-	-	-	-	-	-	-	-	-	-	-	-	-	-	-	-	-	-	-	-	-	-	-	-	-	-	-	-	-	-	-	-	-	-	-	-	-	-	-	-	-
AX-147248145	Araip.B04	115144329	Mag1	-	-	-	-	-	-	-	-	-	-	-	-	-	-	-	-	-	-	-	-	-	-	-	-	-	-	-	-	-	-	-	-	-	-	-	-	-	-	-	-	-	-	-	-	-	-
AX-147248201	Araip.B04	116747424	Mag1	-	-	-	-	-	-	-	-	-	-	-	-	-	-	-	-	-	-	-	-	-	-	-	-	-	-	-	-	-	-	-	-	-	-	-	-	-	-	-	-	-	-	-	-	-	-
AX-147248226	Araip.B04	117235343	Mag1	-	-	-	-	-	-	-	-	-	-	-	-	-	-	-	-	-	-	-	-	-	-	-	-	-	-	-	-	-	-	-	-	-	-	-	-	-	-	-	-	-	-	-	-	-	-
AX-147220712	Araip.B04	119437232	Mag1	-	-	-	-	-	-	-	-	Mag1	-	-	-	Mag1	-	Mag1	-	-	-	Mag1	-	-	-	-	-	-	-	-	Mag1	-	Mag1	-	-	Mag1	-	-	-	Mag1	Mag1	-	Mag1	-	-	-	Mag1	-	-
AX-176797804	Araip.B04	120458702	Mag1	-	-	-	-	-	-	-	-	-	-	-	-	-	-	-	-	-	-	-	-	-	-	-	-	-	-	-	-	-	-	-	-	-	-	-	-	-	-	-	-	-	-	-	-	-	-
AX-147248330	Araip.B04	121604095	Mag2	-	-	-	-	-	-	-	-	-	-	-	-	-	-	-	-	-	-	-	-	-	-	-	-	-	-	-	-	-	-	-	-	-	-	-	-	-	-	-	-	-	-	-	-	-	-
AX-147248350	Araip.B04	122774858	Mag1	-	-	-	-	-	-	-	-	-	-	-	-	-	-	-	-	-	-	-	-	-	-	-	-	-	-	-	-	-	-	-	-	-	-	-	-	-	-	-	-	-	-	-	-	-	-
AX-176792129	Araip.B04	122875424	Mag1	-	-	-	-	-	-	-	-	-	-	-	-	-	-	-	-	-	-	-	-	-	-	-	-	-	-	-	-	-	-	-	-	-	-	-	-	-	-	-	-	-	-	-	-	-	-
AX-176801426	Araip.B04	123159927	-	-	-	-	-	-	-	-	-	-	-	-	-	-	-	-	-	-	-	-	-	-	-	-	-	-	-	-	-	-	-	-	-	-	-	-	-	-	-	-	-	-	-	-	-	-	-
AX-147248404	Araip.B04	124119554	Mag1	-	-	-	-	-	-	-	-	-	-	-	-	-	-	-	-	-	-	-	-	-	-	-	-	-	-	-	-	-	-	-	-	-	-	-	-	-	-	-	-	-	-	-	-	-	-
AX-147248505	Araip.B04	126079244	Mag1	-	-	-	-	-	-	-	-	-	-	-	-	-	-	-	-	-	-	-	-	-	-	-	-	-	-	-	-	-	-	-	-	-	-	-	-	-	-	-	-	-	-	-	-	-	-
AX-147248566	Araip.B04	127389859	Mag1	-	-	-	-	-	-	-	-	-	-	-	-	-	-	-	-	-	-	-	-	-	-	-	-	-	-	-	-	-	-	-	-	-	-	-	-	-	-	-	-	-	-	-	-	-	-
AX-147248574	Araip.B04	127790198	Mag1	-	-	-	-	-	-	-	-	-	-	-	-	-	-	-	-	-	-	-	-	-	-	-	-	-	-	-	-	-	-	-	-	-	-	-	-	-	-	-	-	-	-	-	-	-	-
AX-176791603	Araip.B04	127793072	Mag1	-	-	-	-	-	-	-	-	-	-	-	-	-	-	-	-	-	-	-	-	-	-	-	-	-	-	-	-	-	-	-	-	-	-	-	-	-	-	-	-	-	-	-	-	-	-
AX-176794343	Araip.B04	127805277	Mag1	-	-	-	-	-	-	-	-	-	-	-	-	-	-	-	-	-	-	-	-	-	-	-	-	-	-	-	-	-	-	-	-	-	-	-	-	-	-	-	-	-	-	-	-	-	-
AX-176795247	Araip.B04	127879728	-	-	-	-	-	-	-	-	-	-	-	-	-	-	-	-	-	-	-	-	-	-	-	-	-	-	-	-	-	-	-	-	-	-	-	-	-	-	-	-	-	-	-	-	-	-	-
AX-147221053	Araip.B04	127912867	Mag1	-	-	-	-	-	-	-	-	-	-	-	-	-	-	-	-	-	-	-	-	-	-	-	-	-	-	-	-	-	-	-	-	-	-	-	-	-	-	-	-	-	-	-	-	-	-
AX-147248720	Araip.B04	129935909	Mag1	-	-	-	-	-	-	-	-	-	-	-	-	-	-	-	-	-	-	-	-	-	-	-	-	-	-	-	-	-	-	-	-	-	-	-	-	-	-	-	-	-	-	-	-	-	-
AX-176792082	Araip.B04	130877719	-	-	-	-	-	-	-	-	-	-	-	-	-	-	-	-	-	-	-	-	-	-	-	-	-	-	-	-	-	-	-	-	-	-	-	-	-	-	-	-	-	-	-	-	-	-	-
AX-147248802	Araip.B04	130898678	Mag1	-	-	-	-	-	-	-	-	-	-	-	-	-	-	-	-	-	-	-	-	-	-	-	-	-	-	-	-	-	-	-	-	-	-	-	-	-	-	-	-	-	-	-	-	-	-
AX-147221280	Araip.B04	130961045	Mag1	-	-	Mag1	-	Mag2	-	Mag1	-	Mag2	-	Mag1	-	-	-	-	-	Mag1	Mag1	-	Mag1	-	Mag1	-	Mag1	-	Mag1	-	Mag1	-	Mag1	-	-	-	Mag1	-	Mag1	-	-	Mag1	-	Mag1	-	-	-	Mag1	-
AX-176799045	Araip.B04	130996008	Mag1	-	-	Mag1	-	Mag1	-	-	-	Mag1	-	-	-	-	-	-	-	Mag1	-	-	-	-	-	-	Mag1	-	Mag1	-	Mag1	-	Mag1	-	-	-	-	-	-	-	-	-	-	Mag1	-	-	-	Mag1	-
AX-147248816	Araip.B04	131009789	Mag1	-	-	-	-	Mag1	-	-	-	Mag1	-	-	-	-	-	-	-	Mag1	-	-	-	-	-	-	-	-	-	-	-	-	-	-	-	-	-	-	-	-	-	-	-	-	-	-	-	Mag1	-
AX-147221308	Araip.B04	131087339	Mag2	-	-	Mag1	-	Mag2	-	Mag1	-	Mag2	-	Mag1	-	-	-	-	-	Mag2	Mag1	-	Mag1	-	Mag1	-	Mag1	-	Mag1	-	Mag1	-	Mag1	-	-	-	Mag1	-	Mag1	-	-	Mag1	-	Mag1	-	-	-	Mag1	-
AX-147221309	Araip.B04	131087434	Mag2	-	-	Mag1	-	Mag2	-	Mag1	-	Mag2	-	Mag1	-	-	-	-	-	Mag2	Mag1	-	Mag1	-	Mag1	-	Mag1	-	Mag1	-	Mag1	-	Mag1	-	-	-	Mag1	-	Mag1	-	-	Mag1	-	Mag1	-	-	-	Mag1	-
AX-147221312	Araip.B04	131143480	Mag2	-	-	Mag1	-	Mag2	-	Mag1	-	Mag2	-	Mag1	-	-	-	-	-	Mag1	Mag1	-	Mag1	-	Mag1	-	Mag1	-	Mag1	-	Mag1	-	Mag1	-	-	-	Mag1	-	Mag1	-	-	Mag1	-	Mag1	-	-	-	Mag1	-
AX-176798868	Araip.B04	131185893	Mag1	-	-	-	-	Mag1	-	Mag1	-	-	-	-	-	-	-	-	-	Mag1	-	-	-	-	-	-	-	-	-	-	Mag1	-	-	-	-	-	Mag1	-	-	-	-	-	-	-	-	-	-	-	-
AX-176795109	Araip.B04	131219792	Mag2	-	-	Mag2	-	Mag2	-	Mag2	-	Mag2	-	Mag2	-	-	-	-	-	Mag2	-	-	-	-	-	-	Mag2	-	Mag2	-	Mag2	-	Mag2	-	-	-	Mag2	-	Mag2	Mag1	-	Mag2	-	Mag1	-	-	-	-	-
AX-147248834	Araip.B04	131282663	Mag2	-	-	Mag1	-	Mag2	-	Mag1	-	Mag2	-	Mag1	-	-	-	-	-	Mag1	Mag1	-	Mag1	-	Mag1	-	Mag1	-	Mag1	-	Mag1	-	Mag1	-	-	-	Mag1	-	Mag1	-	-	Mag1	-	Mag1	-	-	-	Mag1	-
AX-147221332	Araip.B04	131365278	Mag2	-	-	Mag1	-	Mag2	-	Mag1	-	Mag2	-	Mag1	-	-	-	-	-	Mag2	Mag1	-	Mag1	-	-	-	Mag1	-	Mag1	-	Mag1	-	Mag1	-	-	-	Mag1	-	Mag1	-	-	Mag1	-	Mag1	-	-	-	Mag1	-
AX-147221333	Araip.B04	131365849	-	-	-	Mag1	-	Mag2	-	Mag1	-	Mag2	-	Mag1	-	-	-	-	-	Mag2	Mag1	-	Mag1	-	Mag1	-	Mag1	-	Mag1	-	Mag1	-	Mag1	-	-	-	Mag1	-	Mag1	-	-	Mag1	-	Mag1	-	-	-	Mag1	-
AX-147221335	Araip.B04	131366514	Mag2	-	-	Mag1	-	Mag2	-	Mag1	-	Mag2	-	Mag1	-	-	-	-	-	-	Mag1	-	Mag1	-	Mag1	-	Mag1	-	Mag1	-	Mag1	-	Mag1	-	-	-	Mag1	-	-	-	-	-	-	Mag1	-	-	-	Mag1	-
AX-176791380	Araip.B04	131369085	Mag2	-	-	Mag1	-	Mag2	-	Mag1	-	Mag2	-	Mag1	-	-	-	-	-	Mag2	Mag1	-	Mag1	-	Mag1	-	Mag1	-	Mag1	-	Mag1	-	Mag1	-	-	-	Mag1	-	Mag1	-	-	Mag1	-	Mag1	-	-	-	Mag1	-
AX-147221336	Araip.B04	131369776	Mag2	-	-	Mag1	-	Mag2	-	Mag1	-	Mag2	-	Mag1	-	-	-	-	-	Mag2	Mag1	-	Mag1	-	Mag1	-	Mag1	-	Mag1	-	Mag1	-	Mag1	-	-	-	Mag1	-	Mag1	-	-	Mag1	-	Mag1	-	-	-	Mag1	-
AX-147221339	Araip.B04	131385626	Mag2	-	-	Mag1	-	Mag2	-	Mag1	-	Mag2	-	Mag1	-	-	-	-	-	Mag2	Mag1	-	Mag1	-	Mag1	-	Mag1	-	Mag1	-	Mag1	-	Mag1	-	-	-	Mag1	-	Mag1	-	-	Mag1	-	Mag1	-	-	-	Mag1	-
AX-176814770	Araip.B04	131403164	Mag2	-	-	Mag1	-	Mag2	-	Mag1	-	Mag2	-	Mag1	-	-	-	-	-	Mag1	Mag1	-	Mag1	-	Mag1	-	Mag1	-	Mag1	-	Mag1	-	Mag1	-	-	-	Mag1	-	Mag1	-	-	Mag1	-	Mag1	-	-	-	Mag1	-
AX-176822492	Araip.B04	131403739	-	-	-	Mag1	-	Mag2	-	Mag1	-	Mag2	-	Mag1	-	-	-	-	-	Mag2	-	-	Mag1	-	Mag2	-	Mag1	-	Mag1	-	Mag1	-	Mag1	-	-	-	Mag1	-	Mag1	Mag1	-	Mag1	-	Mag1	-	-	-	Mag1	-
AX-147221351	Araip.B04	131404006	-	-	-	Mag1	-	-	-	Mag1	-	Mag1	-	Mag1	-	-	-	-	-	Mag1	Mag1	-	Mag1	-	-	-	Mag1	-	Mag1	-	Mag1	-	Mag1	-	-	-	Mag1	-	Mag1	-	-	Mag1	-	Mag1	-	-	-	-	-
AX-147248849	Araip.B04	131447872	Mag1	-	-	-	-	Mag1	-	Mag1	-	Mag1	-	-	-	-	-	-	-	Mag1	Mag1	-	-	-	Mag1	-	Mag1	-	-	-	Mag1	-	Mag1	-	-	-	-	-	-	-	-	-	-	-	-	-	-	Mag1	-
AX-147248854	Araip.B04	131462529	Mag2	-	-	Mag1	-	Mag2	-	Mag1	-	Mag2	-	Mag1	-	-	-	-	-	Mag1	Mag1	-	Mag1	-	-	-	Mag1	-	Mag1	-	Mag1	-	Mag1	-	-	-	Mag1	-	Mag1	-	-	Mag1	-	Mag1	-	-	-	Mag1	-
AX-147248863	Araip.B04	131625171	-	-	-	Mag1	-	Mag2	-	Mag1	-	Mag2	-	Mag1	-	-	-	-	-	-	Mag1	-	Mag1	-	Mag2	Mag1	Mag1	-	Mag1	-	Mag1	-	Mag2	-	-	Mag1	Mag1	-	Mag1	Mag1	-	Mag1	-	Mag1	-	-	-	Mag1	-
AX-147248864	Araip.B04	131628381	Mag2	-	-	Mag1	-	Mag2	-	Mag1	-	Mag2	-	Mag1	-	-	-	-	-	Mag1	Mag1	-	Mag1	-	-	-	Mag1	-	Mag1	-	Mag1	-	-	-	-	-	Mag1	-	Mag1	-	-	Mag1	-	-	-	-	-	Mag1	-
AX-147248894	Araip.B04	132671610	Mag2	-	-	-	-	Mag2	-	Mag1	-	Mag2	-	Mag1	-	-	-	-	-	Mag1	Mag1	-	Mag1	-	Mag1	-	Mag1	-	Mag1	-	Mag1	-	Mag1	-	-	-	Mag1	-	-	-	-	Mag1	-	Mag1	-	-	-	Mag1	-
AX-147248906	Araip.B04	133215432	-	-	-	-	-	Mag2	-	-	-	Mag1	-	Mag1	-	-	-	-	-	Mag1	Mag1	-	Mag1	-	Mag1	-	Mag1	-	Mag1	-	Mag1	-	Mag1	-	-	-	Mag1	-	-	-	-	Mag1	-	Mag1	-	-	-	Mag1	-
AX-147248909	Araip.B04	133317694	Mag2	-	-	-	-	Mag2	-	-	-	Mag2	-	Mag1	-	-	-	-	-	Mag2	Mag1	-	Mag1	-	Mag1	-	Mag1	-	Mag1	-	Mag1	-	Mag1	-	-	-	Mag1	-	-	-	-	Mag1	-	Mag1	-	-	-	Mag1	-
AX-147248917	Araip.B05	282943	Mag1	-	-	-	-	-	-	-	-	-	-	-	-	-	-	-	-	-	-	-	-	-	-	-	-	-	-	-	-	-	-	-	-	-	-	-	-	-	-	-	-	-	-	-	-	-	-
AX-147248919	Araip.B05	412504	Mag1	-	-	-	-	-	-	-	-	-	-	-	-	-	-	-	-	-	-	-	-	-	-	-	-	-	-	-	-	-	-	-	-	-	-	-	-	-	-	-	-	-	-	-	-	-	-
AX-147248920	Araip.B05	424334	Mag1	-	-	-	-	-	-	-	-	-	-	-	-	-	-	-	-	-	-	-	-	-	-	-	-	-	-	-	-	-	-	-	-	-	-	-	-	-	-	-	-	-	-	-	-	-	-
AX-147248939	Araip.B05	1816586	Mag1	-	-	-	-	-	-	-	-	-	-	-	-	-	-	-	-	-	-	-	-	-	-	-	-	-	-	-	-	-	-	-	-	-	-	-	-	-	-	-	-	-	-	-	-	-	-
AX-147248969	Araip.B05	2350940	Mag1	-	-	-	-	-	-	-	-	-	-	-	-	-	-	-	-	-	-	-	-	-	-	-	-	-	-	-	-	-	-	-	-	-	-	-	-	-	-	-	-	-	-	-	-	-	-
AX-176791381	Araip.B05	2397556	Mag1	-	-	-	-	-	-	-	-	-	-	-	-	-	-	-	-	-	-	-	-	-	-	-	-	-	-	-	-	-	-	-	-	-	-	-	-	-	-	-	-	-	-	-	-	-	-
AX-147248972	Araip.B05	2402887	Mag1	-	-	-	-	-	-	-	-	-	-	-	-	-	-	-	-	-	-	-	-	-	-	-	-	-	-	-	-	-	-	-	-	-	-	-	-	-	-	-	-	-	-	-	-	-	-
AX-147248975	Araip.B05	2654366	Mag1	-	-	-	-	-	-	-	-	-	-	-	-	-	-	-	-	-	-	-	-	-	-	-	-	-	-	-	-	-	-	-	-	-	-	-	-	-	-	-	-	-	-	-	-	-	-
AX-147248984	Araip.B05	2860241	Mag1	-	-	-	-	-	-	-	-	-	-	-	-	-	-	-	-	-	-	-	-	-	-	-	-	-	-	-	-	-	-	-	-	-	-	-	-	-	-	-	-	-	-	-	-	-	-
AX-147249016	Araip.B05	4560567	Mag1	-	-	-	-	-	-	-	-	-	-	-	-	-	-	-	-	-	-	-	-	-	-	-	-	-	-	-	-	-	-	-	-	-	-	-	-	-	-	-	-	-	-	-	-	-	-
AX-176791571	Araip.B05	7070083	Mag1	-	-	-	-	-	-	-	-	-	-	-	-	-	-	-	-	-	-	-	-	-	-	-	-	-	-	-	-	-	-	-	-	-	-	-	-	-	-	-	-	-	-	-	-	-	-
AX-176797854	Araip.B05	7853019	Mag2	-	-	-	-	-	-	-	-	-	-	-	-	-	-	-	-	-	-	-	-	-	-	-	-	-	-	-	-	-	-	-	-	-	-	-	-	-	-	-	-	-	-	-	-	-	-
AX-147249140	Araip.B05	8975356	Mag1	-	-	-	-	-	-	-	-	-	-	-	-	-	-	-	-	-	-	-	-	-	-	-	-	-	-	-	-	-	-	-	-	-	-	-	-	-	-	-	-	-	-	-	-	-	-
AX-147249156	Araip.B05	9584369	Mag1	-	-	-	-	-	-	-	-	-	-	-	-	-	-	-	-	-	-	-	-	-	-	-	-	-	-	-	-	-	-	-	-	-	-	-	-	-	-	-	-	-	-	-	-	-	-
AX-147249162	Araip.B05	9721311	Mag1	-	-	-	-	-	-	-	-	-	-	-	-	-	-	-	-	-	-	-	-	-	-	-	-	-	-	-	-	-	-	-	-	-	-	-	-	-	-	-	-	-	-	-	-	-	-
AX-147249176	Araip.B05	10152190	Mag1	-	-	-	-	-	-	-	-	-	-	-	-	-	-	-	-	-	-	-	-	-	-	-	-	-	-	-	-	-	-	-	-	-	-	-	-	-	-	-	-	-	-	-	-	-	-
AX-176791383	Araip.B05	10579508	Mag1	-	-	-	-	-	-	-	-	-	-	-	-	-	-	-	-	-	-	-	-	-	-	-	-	-	-	-	-	-	-	-	-	-	-	-	-	-	-	-	-	-	-	-	-	-	-
AX-147249192	Araip.B05	10584129	Mag1	-	-	-	-	-	-	-	-	-	-	-	-	-	-	-	-	-	-	-	-	-	-	-	-	-	-	-	-	-	-	-	-	-	-	-	-	-	-	-	-	-	-	-	-	-	-
AX-147249195	Araip.B05	10774687	Mag1	-	-	-	-	-	-	-	-	-	-	-	-	-	-	-	-	-	-	-	-	-	-	-	-	-	-	-	-	-	-	-	-	-	-	-	-	-	-	-	-	-	-	-	-	-	-
AX-147249262	Araip.B05	12619468	Mag1	-	-	-	-	-	-	-	-	-	-	-	-	-	-	-	-	-	-	-	-	-	-	-	-	-	-	-	-	-	-	-	-	-	-	-	-	-	-	-	-	-	-	-	-	-	-
AX-147249271	Araip.B05	12717469	Mag1	-	-	-	-	-	-	-	-	-	-	-	-	-	-	-	-	-	-	-	-	-	-	-	-	-	-	-	-	-	-	-	-	-	-	-	-	-	-	-	-	-	-	-	-	-	-
AX-147249337	Araip.B05	15082353	Mag1	-	-	-	-	-	-	-	-	-	-	-	-	-	-	-	-	-	-	-	-	-	-	-	-	-	-	-	-	-	-	-	-	-	-	-	-	-	-	-	-	-	-	-	-	-	-
AX-176791389	Araip.B05	16114751	Mag1	-	-	-	-	-	-	-	-	-	-	-	-	-	-	-	-	-	-	-	-	-	-	-	-	-	-	-	-	-	-	-	-	-	-	-	-	-	-	-	-	-	-	-	-	-	-
AX-176813453	Araip.B05	17784280	Mag1	-	-	-	-	-	-	-	-	-	-	-	-	-	-	-	-	-	-	-	-	-	-	-	-	-	-	-	-	-	-	-	-	-	-	-	-	-	-	-	-	-	-	-	-	-	-
AX-176808166	Araip.B05	18651029	Mag2	Mag1	Mag1	Mag1	-	Mag1	Mag1	Mag1	-	Mag2	-	-	Mag1	Mag2	Mag1	Mag2	-	-	-	-	-	Mag1	-	Mag2	-	Mag2	Mag1	Mag1	Mag2	Mag1	Mag2	Mag1	-	-	Mag1	-	-	Mag2	Mag2	Mag1	Mag2	Mag1	-	Mag1	Mag2	-	Mag1
AX-176817383	Araip.B05	19113881	-	-	-	-	-	-	-	-	-	-	-	-	-	-	-	-	-	-	-	-	-	-	-	-	-	-	-	-	-	-	-	-	-	-	-	-	-	-	-	-	-	-	-	-	-	-	-
AX-147222145	Araip.B05	20375298	Mag1	-	-	-	-	-	-	-	-	-	-	-	-	-	-	-	-	-	-	-	-	-	-	-	-	-	-	-	-	-	-	-	-	-	-	-	-	-	-	-	-	-	-	-	-	-	-
AX-176793550	Araip.B05	24344951	-	-	-	-	-	-	-	-	-	-	-	-	-	-	-	-	-	-	-	-	-	-	-	-	-	-	-	-	-	-	-	-	-	-	-	-	-	-	-	-	-	-	-	-	-	-	-
AX-176811223	Araip.B05	25352303	-	-	-	-	-	-	-	-	-	-	-	-	-	-	-	-	-	-	-	-	-	-	-	-	-	-	-	-	-	-	-	-	-	-	-	-	-	-	-	-	-	-	-	-	-	-	-
AX-176804524	Araip.B05	25508442	-	-	-	-	-	-	-	-	-	-	-	-	-	-	-	-	-	-	-	-	-	-	-	-	-	-	-	-	-	-	-	-	-	-	-	-	-	-	-	-	-	-	-	-	-	-	-
AX-176798578	Araip.B05	25713342	-	-	-	-	-	-	-	-	-	-	-	-	-	-	-	-	-	-	-	-	-	-	-	-	-	-	-	-	-	-	-	-	-	-	-	-	-	-	-	-	-	-	-	-	-	-	-
AX-176815769	Araip.B05	40374124	Mag1	-	Mag1	-	-	-	-	-	-	-	-	-	Mag1	-	Mag1	-	-	-	-	-	-	-	-	-	-	-	-	-	-	-	-	-	-	-	-	-	-	-	-	-	Mag1	-	Mag1	-	Mag1	-	Mag1
AX-147222478	Araip.B05	43415063	Mag1	-	-	-	-	-	-	-	-	-	-	-	-	-	-	-	-	-	-	-	-	-	-	-	-	-	-	-	-	-	-	-	-	-	-	-	-	-	-	-	-	-	-	-	-	-	-
AX-176809590	Araip.B05	64545278	Mag2	-	Mag2	-	-	-	-	-	-	-	-	-	Mag2	-	Mag2	-	Mag1	-	-	-	-	-	-	-	-	-	-	-	-	-	-	-	-	-	-	-	-	-	-	-	Mag2	-	Mag2	-	Mag2	-	Mag1
AX-147222592	Araip.B05	73835105	Mag1	-	-	-	-	-	-	-	-	-	-	-	-	-	-	-	-	-	-	-	-	-	-	-	-	-	-	-	-	-	-	-	-	-	-	-	-	-	-	-	-	-	-	-	-	-	-
AX-176821867	Araip.B05	93830809	Mag1	-	Mag1	-	-	-	-	-	-	-	-	-	Mag1	-	Mag1	-	-	-	-	-	-	-	-	-	-	-	-	-	-	-	-	-	-	-	-	-	-	-	-	-	Mag1	-	Mag1	-	Mag1	-	-
AX-147250019	Araip.B05	94206944	Mag1	-	-	-	-	-	-	-	-	-	-	-	-	-	-	-	-	-	-	-	-	-	-	-	-	-	-	-	-	-	-	-	-	-	-	-	-	-	-	-	-	-	-	-	-	-	-
AX-176812700	Araip.B05	95397826	Mag1	-	Mag1	-	-	-	-	-	-	-	-	-	Mag1	-	Mag1	-	Mag1	-	-	-	-	-	-	-	-	-	-	-	-	-	-	-	-	-	-	-	-	-	-	-	Mag1	-	Mag1	-	Mag1	-	Mag1
AX-176819761	Araip.B05	115197399	Mag1	-	-	-	-	-	-	-	-	-	-	-	-	-	-	-	-	-	-	-	-	-	-	-	-	-	-	-	-	-	-	-	-	-	-	-	-	-	-	-	-	-	-	-	-	-	-
AX-147250202	Araip.B05	117310886	Mag2	-	Mag2	-	-	-	-	-	-	-	-	-	Mag2	-	Mag2	-	Mag1	-	-	-	-	-	-	-	-	-	-	-	-	-	-	-	-	-	-	-	-	-	-	-	Mag2	-	Mag2	-	Mag2	-	Mag1
AX-147250224	Araip.B05	118856272	Mag2	-	Mag2	-	-	-	-	-	-	-	-	-	Mag2	-	Mag2	-	Mag1	-	-	-	-	-	-	-	-	-	-	-	-	-	-	-	-	-	-	-	-	-	-	-	Mag2	-	Mag2	-	Mag2	-	Mag1
AX-176815565	Araip.B05	120888173	-	-	-	-	-	-	-	-	-	-	-	-	-	-	-	-	-	-	-	-	-	-	-	-	-	-	-	-	-	-	-	-	-	-	-	-	-	-	-	-	-	-	-	-	-	-	-
AX-147250318	Araip.B05	122956001	Mag2	-	Mag2	-	-	-	-	-	-	-	-	-	Mag2	-	Mag2	-	Mag1	-	-	-	-	-	-	-	-	-	-	-	-	-	-	-	-	-	-	-	-	-	-	-	Mag2	-	Mag2	-	Mag2	-	Mag1
AX-147250343	Araip.B05	123992671	Mag2	-	Mag2	-	-	-	-	-	-	-	-	-	Mag2	-	Mag2	-	Mag1	-	-	-	-	-	-	-	-	-	-	-	-	-	-	-	-	-	-	-	-	-	-	-	Mag2	-	Mag2	-	Mag2	-	Mag1
AX-176800777	Araip.B05	125699812	Mag1	-	-	-	-	-	-	-	-	-	-	-	-	-	-	-	-	-	-	-	-	-	-	-	-	-	-	-	-	-	-	-	-	-	-	-	-	-	-	-	-	-	-	-	-	-	-
AX-147250415	Araip.B05	126784749	Mag1	-	Mag1	-	-	-	-	-	-	-	-	-	Mag1	-	Mag1	-	Mag1	-	-	-	-	-	-	-	-	-	-	-	-	-	-	-	-	-	-	-	-	-	-	-	Mag1	-	Mag1	-	Mag1	-	Mag1
AX-147250428	Araip.B05	127127435	Mag2	-	Mag2	-	-	-	-	-	-	-	-	-	Mag2	-	Mag2	-	Mag1	-	-	-	-	-	-	-	-	-	-	-	-	-	-	-	-	-	-	-	-	-	-	-	Mag2	-	Mag2	-	Mag2	-	Mag1
AX-147250483	Araip.B05	130306816	Mag1	-	Mag1	-	-	-	-	-	-	-	-	-	Mag1	-	Mag1	-	Mag1	-	-	-	-	-	-	-	-	-	-	-	-	-	-	-	-	-	-	-	-	-	-	-	Mag1	-	Mag1	-	Mag1	-	Mag1
AX-147250542	Araip.B05	132615089	Mag2	-	Mag2	-	-	-	-	-	-	-	-	-	Mag2	-	Mag2	-	Mag1	-	-	-	-	-	-	-	-	-	-	-	-	-	-	-	-	-	-	-	-	-	-	-	Mag2	-	Mag2	-	Mag2	-	Mag1
AX-147250555	Araip.B05	133272503	Mag2	-	Mag2	-	-	-	-	-	-	-	-	-	Mag2	-	Mag2	-	Mag1	-	-	-	-	-	-	-	-	-	-	-	-	-	-	-	-	-	-	-	-	-	-	-	Mag2	-	Mag2	-	Mag2	-	Mag1
AX-147250568	Araip.B05	133901493	Mag1	-	-	-	-	-	-	-	-	-	-	-	Mag1	-	Mag1	-	Mag1	-	-	-	-	-	-	-	-	-	-	-	-	-	-	-	-	-	-	-	-	-	-	-	Mag1	-	Mag1	-	Mag1	-	Mag1
AX-147250693	Araip.B05	137526639	Mag2	-	Mag2	-	-	-	-	-	-	-	-	-	Mag2	-	Mag2	-	Mag1	-	-	-	-	-	-	-	-	-	-	-	-	-	-	-	-	-	-	-	-	-	-	-	Mag2	-	Mag2	-	Mag2	-	Mag1
AX-176791873	Araip.B05	137560499	Mag2	-	Mag2	-	-	-	-	-	-	-	-	-	Mag2	-	Mag2	-	Mag1	-	-	-	-	-	-	-	-	-	-	-	-	-	-	-	-	-	-	-	-	-	-	-	Mag2	-	Mag2	-	Mag2	-	Mag1
AX-147250728	Araip.B05	138251806	Mag2	-	Mag2	-	-	-	-	-	-	-	-	-	Mag2	-	Mag2	-	Mag1	-	-	-	-	-	-	-	-	-	-	-	-	-	-	-	-	-	-	-	-	-	-	-	Mag2	-	Mag2	-	Mag2	-	Mag1
AX-176821307	Araip.B05	141474535	-	-	-	-	-	-	-	-	-	-	-	-	-	-	-	-	-	-	-	-	-	-	-	-	-	-	-	-	-	-	-	-	-	-	-	-	-	-	-	-	-	-	-	-	-	-	-
AX-147250911	Araip.B05	141992969	Mag1	-	-	-	-	-	-	-	-	-	-	-	-	-	-	-	-	-	-	-	-	-	-	-	-	-	-	-	-	-	-	-	-	-	-	-	-	-	-	-	-	-	-	-	-	-	-
AX-176799661	Araip.B05	142429794	-	-	-	-	-	-	-	-	-	-	-	-	-	-	-	-	-	-	-	-	-	-	-	-	-	-	-	-	-	-	-	-	-	-	-	-	-	-	-	-	-	-	-	-	-	-	-
AX-147250925	Araip.B05	142477971	Mag1	-	-	-	-	-	-	-	-	-	-	-	-	-	-	-	-	-	-	-	-	-	-	-	-	-	-	-	-	-	-	-	-	-	-	-	-	-	-	-	-	-	-	-	-	-	-
AX-147250929	Araip.B05	142482574	Mag1	-	-	-	-	-	-	-	-	-	-	-	-	-	-	-	-	-	-	-	-	-	-	-	-	-	-	-	-	-	-	-	-	-	-	-	-	-	-	-	-	-	-	-	-	-	-
AX-147250975	Araip.B05	143112886	-	-	-	-	-	-	-	-	-	-	-	-	-	-	-	-	-	-	-	-	-	-	-	-	-	-	-	-	-	-	-	-	-	-	-	-	-	-	-	-	-	-	-	-	-	-	-
AX-147251018	Araip.B05	143642749	Mag2	-	-	-	-	-	-	-	-	-	-	-	-	-	-	-	-	-	-	-	-	-	-	-	-	-	-	-	-	-	-	-	-	-	-	-	-	-	-	-	-	-	-	-	-	-	-
AX-147251108	Araip.B05	144835625	Mag1	-	-	-	-	-	-	-	-	-	-	-	-	-	-	-	-	-	-	-	-	-	-	-	-	-	-	-	-	-	-	-	-	-	-	-	-	-	-	-	-	-	-	-	-	-	-
AX-147251132	Araip.B05	145320571	-	-	-	-	-	-	-	-	-	-	-	-	-	-	-	-	-	-	-	-	-	-	-	-	-	-	-	-	-	-	-	-	-	-	-	-	-	-	-	-	-	-	-	-	-	-	-
AX-147251208	Araip.B05	146510806	Mag1	-	-	-	-	-	-	-	-	-	-	-	-	-	-	-	-	-	-	-	-	-	-	-	-	-	-	-	-	-	-	-	-	-	-	-	-	-	-	-	-	-	-	-	-	-	-
AX-147223816	Araip.B05	146590930	Mag1	-	-	-	-	-	-	-	-	-	-	-	-	-	-	-	-	-	-	-	-	-	-	-	-	-	-	-	-	-	-	-	-	-	-	-	-	-	-	-	-	-	-	-	-	-	-
AX-147251252	Araip.B05	147343390	Mag1	-	-	-	-	-	-	-	-	-	-	-	-	-	-	-	-	-	-	-	-	-	-	-	-	-	-	-	-	-	-	-	-	-	-	-	-	-	-	-	-	-	-	-	-	-	-
AX-147251264	Araip.B05	147383549	Mag2	-	-	-	-	-	-	-	-	-	-	-	-	-	-	-	-	-	-	-	-	-	-	-	-	-	-	-	-	-	-	-	-	-	-	-	-	-	-	-	-	-	-	-	-	-	-
AX-147251343	Araip.B05	148444844	Mag2	-	-	-	-	-	-	-	-	-	-	-	-	-	-	-	-	-	Mag1	-	Mag1	-	Mag1	-	Mag2	-	Mag2	-	Mag1	-	Mag1	-	Mag1	-	Mag1	-	-	-	-	-	-	-	-	-	-	-	-
AX-147251390	Araip.B05	148892105	Mag2	-	-	-	-	-	-	-	-	-	-	-	-	-	-	-	-	-	Mag1	-	Mag1	-	Mag1	-	Mag2	-	Mag2	-	Mag1	-	Mag1	-	Mag1	-	Mag1	-	-	-	-	-	-	-	-	-	-	-	-
AX-147223970	Araip.B05	149108891	Mag1	-	-	-	-	-	-	-	-	-	-	-	-	-	-	-	-	-	Mag1	-	Mag1	-	Mag1	-	Mag1	-	Mag1	-	Mag1	-	Mag1	-	Mag1	-	-	-	-	-	-	-	-	-	-	-	-	-	-
AX-147223971	Araip.B05	149112025	-	-	-	-	-	-	-	-	-	-	-	-	-	-	-	-	-	-	Mag1	-	Mag1	-	Mag1	-	Mag2	-	Mag2	-	Mag1	-	Mag1	-	Mag1	-	Mag1	-	-	-	-	-	-	-	-	-	-	-	-
AX-147251425	Araip.B05	149286498	Mag2	-	-	-	-	Mag1	-	-	-	Mag2	-	-	-	Mag2	-	Mag2	-	-	-	Mag2	-	Mag2	-	-	-	-	-	Mag1	-	Mag1	-	Mag1	-	Mag1	-	Mag2	-	Mag1	-	-	-	-	-	Mag1	-	Mag1	-
AX-147224039	Araip.B05	149672764	Mag2	-	-	-	-	-	-	-	-	-	-	-	-	-	-	-	-	-	-	Mag2	-	Mag2	-	Mag1	-	Mag1	-	Mag1	-	Mag1	-	Mag1	-	Mag1	-	Mag2	-	Mag1	-	-	-	-	-	-	-	-	-
AX-147251517	Araip.B06	252362	-	-	-	-	-	-	-	-	-	-	-	-	-	-	-	-	-	-	-	-	-	-	-	-	-	-	-	-	-	-	-	-	-	-	-	-	-	-	-	-	-	-	-	-	-	-	Mag1
AX-147251572	Araip.B06	906068	Mag2	-	-	-	-	-	-	-	-	-	-	-	-	-	-	-	-	-	-	-	-	-	Mag1	-	-	-	-	-	-	-	-	-	-	-	-	-	-	-	-	-	-	-	-	-	-	-	Mag1
AX-176815509	Araip.B06	1909409	Mag1	-	-	-	-	-	-	-	-	-	-	-	-	-	-	-	-	-	-	-	-	-	-	-	-	-	-	-	-	-	-	-	-	-	-	-	-	-	-	-	-	-	-	-	-	-	Mag1
AX-176821623	Araip.B06	2198106	Mag2	-	-	-	-	-	-	-	-	-	-	-	-	-	-	-	-	-	-	-	-	-	-	-	-	-	-	-	-	-	-	-	-	-	-	-	-	-	-	-	-	-	-	-	-	-	-
AX-147251793	Araip.B06	3620645	Mag2	-	-	-	-	-	-	-	-	-	-	-	-	-	-	-	-	-	-	-	-	-	-	-	-	-	-	-	-	-	-	-	-	-	-	-	-	-	-	-	-	-	-	-	-	-	Mag1
AX-147251810	Araip.B06	3917236	Mag2	-	-	-	-	-	-	-	-	-	-	-	-	-	-	-	-	-	-	-	-	-	-	-	-	-	-	-	-	-	-	-	-	-	-	-	-	-	-	-	-	-	-	-	-	-	Mag1
AX-176794335	Araip.B06	7000834	-	-	-	-	-	-	-	-	-	-	-	-	-	-	-	-	-	-	-	-	-	-	-	-	-	-	-	-	-	-	-	-	-	-	-	-	-	-	-	-	-	-	-	-	-	-	-
AX-147252038	Araip.B06	7484274	-	-	-	-	-	-	-	-	-	-	-	-	-	-	-	-	-	-	-	-	-	-	-	-	-	-	-	-	-	-	-	-	-	-	-	-	-	-	-	-	-	-	-	-	-	-	Mag1
AX-147252098	Araip.B06	9318095	Mag2	-	-	-	-	-	-	-	-	-	-	-	-	-	-	-	-	-	-	-	-	-	-	-	-	-	-	-	-	-	-	-	-	-	-	-	-	-	-	-	-	-	-	-	-	-	-
AX-147252228	Araip.B06	12281786	Mag2	-	-	-	-	-	-	-	-	-	-	-	-	-	-	-	-	-	-	-	-	-	-	-	-	-	-	-	-	-	-	-	-	-	-	-	-	-	-	-	-	-	-	-	-	-	-
AX-147252267	Araip.B06	13163062	Mag2	-	-	-	-	-	-	-	-	-	-	-	-	-	-	-	-	-	-	-	-	-	-	-	-	-	-	-	-	-	-	-	-	-	-	-	-	-	-	-	-	-	-	-	-	-	-
AX-147252287	Araip.B06	13633699	Mag2	-	-	-	-	-	-	-	-	-	-	-	-	-	-	-	-	-	-	-	-	-	-	-	-	-	-	-	-	-	-	-	-	-	-	-	-	-	-	-	-	-	-	-	-	-	-
AX-177640081	Araip.B06	13651322	-	-	-	-	-	-	-	-	-	-	-	-	-	-	-	-	-	-	-	-	-	-	-	-	-	-	-	-	-	-	-	-	-	-	-	-	-	-	-	-	-	-	-	-	-	-	-
AX-147252289	Araip.B06	13664789	-	-	-	-	-	-	-	-	-	-	-	-	-	-	-	-	-	-	-	-	-	-	-	-	-	-	-	-	-	-	-	-	-	-	-	-	-	-	-	-	-	-	-	-	-	-	-
AX-147252306	Araip.B06	13957090	Mag2	-	-	-	-	-	-	-	-	-	-	-	-	-	-	-	-	-	-	-	-	-	-	-	-	-	-	-	-	-	-	-	-	-	-	-	-	-	-	-	-	-	-	-	-	-	-
AX-147252314	Araip.B06	14176970	Mag2	-	-	-	-	-	-	-	-	-	-	-	-	-	-	-	-	-	-	-	-	-	-	-	-	-	-	-	-	-	-	-	-	-	-	-	-	-	-	-	-	-	-	-	-	-	-
AX-147252329	Araip.B06	14374420	Mag2	-	-	-	-	-	-	-	-	-	-	-	-	-	-	-	-	-	-	-	-	-	-	-	-	-	-	-	-	-	-	-	-	-	-	-	-	-	-	-	-	-	-	-	-	-	-
AX-147252421	Araip.B06	16759789	Mag2	-	-	-	-	-	-	-	-	-	-	-	-	-	-	-	-	-	-	-	-	-	-	-	-	-	-	-	-	-	-	-	-	-	-	-	-	-	-	-	-	-	-	-	-	-	-
AX-176795310	Araip.B06	22767474	Mag2	Mag2	Mag2	Mag2	Mag2	Mag2	Mag2	Mag2	Mag1	Mag2	Mag1	Mag2	Mag1	Mag2	Mag1	Mag2	Mag2	Mag2	Mag2	Mag2	Mag2	Mag1	Mag2	Mag2	Mag2	Mag2	Mag2	Mag2	Mag2	Mag2	-	Mag2	Mag2	-	Mag2	Mag2	Mag2	Mag2	Mag1	Mag2	Mag2	Mag2	Mag1	Mag2	Mag2	Mag2	Mag2
AX-176791924	Araip.B06	24364654	Mag2	-	-	-	-	-	-	-	-	-	-	-	-	-	-	-	-	-	-	-	-	-	-	-	-	-	-	-	-	-	-	-	-	-	-	-	-	-	-	-	-	-	-	-	-	-	-
AX-147252686	Araip.B06	27994454	Mag1	-	-	-	-	-	-	-	-	-	-	-	-	-	-	-	-	-	-	-	-	-	-	-	-	-	-	-	-	-	-	-	-	-	-	-	-	-	-	-	-	-	-	-	-	-	-
AX-147252687	Araip.B06	27995343	Mag1	-	-	-	-	-	-	-	-	-	-	-	-	-	-	-	-	-	-	-	-	-	-	-	-	-	-	-	-	-	-	-	-	-	-	-	-	-	-	-	-	-	-	-	-	-	-
AX-147252778	Araip.B06	35075298	Mag2	-	-	-	-	Mag2	-	-	-	-	-	-	-	-	-	Mag1	-	-	-	-	-	-	-	-	-	-	-	-	-	-	-	-	-	-	-	-	-	-	-	Mag1	-	-	-	Mag1	-	Mag2	-
AX-147225299	Araip.B06	35557239	Mag1	-	-	-	-	Mag1	-	-	-	-	-	-	-	-	-	-	-	-	-	-	-	-	-	-	-	-	-	-	-	-	-	-	-	-	-	-	-	-	-	-	-	-	-	-	-	Mag1	-
AX-176815586	Araip.B06	37850641	-	-	-	-	-	-	-	-	-	-	-	-	-	-	-	-	-	-	-	-	-	-	-	-	-	-	-	-	-	-	-	-	-	-	-	-	-	-	-	-	-	-	-	-	-	-	-
AX-176810808	Araip.B06	83007288	Mag1	-	-	-	-	-	-	-	-	-	-	-	-	-	-	-	-	-	-	-	-	-	-	-	-	-	-	-	-	-	-	-	-	-	-	-	-	-	-	-	-	-	-	-	-	-	-
AX-147252948	Araip.B06	87043539	-	-	-	-	-	-	-	-	-	-	-	-	-	-	-	-	-	-	-	-	-	-	Mag1	-	-	-	-	-	-	-	-	-	-	-	-	-	-	-	-	-	-	-	-	-	-	-	-
AX-147252973	Araip.B06	89581718	Mag2	-	-	-	-	-	-	-	-	-	-	-	-	-	-	-	-	-	-	-	-	-	-	-	-	-	-	-	-	-	-	-	-	-	-	-	-	-	-	-	-	-	-	-	-	-	-
AX-176808576	Araip.B06	90816220	Mag2	-	-	-	-	-	-	-	-	-	-	-	-	-	-	-	-	-	-	-	-	-	-	-	-	-	-	-	-	-	-	-	-	-	-	-	-	-	-	-	-	-	-	-	-	-	-
AX-176817639	Araip.B06	96567520	Mag2	-	-	-	-	-	-	-	-	-	-	-	-	-	-	-	-	-	-	-	-	-	-	-	-	-	-	-	-	-	-	-	-	-	-	-	-	-	-	-	-	-	-	-	-	-	-
AX-176815067	Araip.B06	96597652	Mag1	-	-	-	-	Mag1	-	-	-	-	-	-	-	-	-	-	-	-	-	-	-	-	-	-	-	-	-	-	-	-	-	-	-	-	-	-	-	-	-	-	-	-	-	-	-	Mag1	-
AX-176791352	Araip.B06	103027033	Mag1	-	-	-	-	-	-	-	-	-	-	-	-	-	-	-	-	-	-	-	-	-	-	-	-	-	-	-	-	-	-	-	-	-	-	-	-	-	-	-	-	-	-	-	-	-	-
AX-147253266	Araip.B06	115228228	-	-	-	-	-	-	-	-	-	-	-	-	-	-	-	-	-	-	-	-	-	-	-	-	-	-	-	-	-	-	-	-	-	-	-	-	-	-	-	-	-	-	-	-	-	-	-
AX-147253268	Araip.B06	115530806	Mag2	-	-	-	-	-	-	-	-	-	-	-	-	-	-	-	-	-	-	-	-	-	-	-	-	-	-	-	-	-	-	-	-	-	-	-	-	-	-	-	-	-	-	-	-	-	-
AX-147253390	Araip.B06	120283916	-	-	-	-	-	-	-	-	-	-	-	-	-	-	-	-	-	-	-	-	-	-	-	-	-	-	-	-	-	-	-	-	-	-	-	-	-	-	-	-	-	-	-	-	-	-	-
AX-147253538	Araip.B06	124381466	Mag2	-	-	-	-	-	-	-	-	-	-	-	-	-	-	-	-	-	-	-	-	-	-	-	-	-	-	-	-	-	-	-	-	-	-	-	-	-	-	-	-	-	-	-	-	-	-
AX-147253545	Araip.B06	124476859	Mag1	-	-	-	-	-	-	-	-	-	-	-	-	-	-	-	-	-	-	-	-	-	-	-	-	-	-	-	-	-	-	-	-	-	-	-	-	-	-	-	-	-	-	-	-	-	-
AX-147253575	Araip.B06	124770106	Mag1	-	-	-	-	-	-	-	-	-	-	-	-	-	-	-	-	-	-	-	-	-	-	-	-	-	-	-	-	-	-	-	-	-	-	-	-	-	-	-	-	-	-	-	-	-	-
AX-147253713	Araip.B06	127612777	Mag2	-	-	-	-	-	-	-	-	-	-	-	-	-	-	-	-	-	-	-	-	-	-	-	-	-	-	Mag1	-	-	-	-	-	Mag1	-	-	-	-	-	-	-	-	-	-	-	-	-
AX-147253740	Araip.B06	128289653	Mag2	-	-	-	-	-	-	-	-	-	-	-	-	-	-	-	-	-	-	-	-	-	-	-	-	-	-	Mag1	-	-	-	-	-	Mag1	-	-	-	-	-	-	-	-	-	-	-	-	-
AX-176817773	Araip.B06	128336903	Mag1	-	-	-	-	-	-	-	-	-	-	-	-	-	-	-	-	-	-	-	-	-	-	-	-	-	-	-	-	-	-	-	-	-	-	-	-	-	-	-	-	-	-	-	-	-	-
AX-147253745	Araip.B06	128352895	Mag1	-	-	-	-	-	-	-	-	-	-	-	-	-	-	-	-	-	-	-	-	-	-	-	-	-	-	-	-	-	-	-	-	-	-	-	-	-	-	-	-	-	-	-	-	-	-
AX-147253779	Araip.B06	128992668	Mag2	-	-	-	-	-	-	-	-	-	-	-	-	-	-	-	-	-	-	-	-	-	-	-	-	-	-	Mag1	-	Mag1	-	-	-	Mag1	-	-	-	-	-	-	-	-	-	-	-	-	-
AX-176820915	Araip.B06	129575475	-	-	-	-	-	-	-	-	-	-	-	-	-	-	-	-	-	-	-	-	-	-	-	-	-	-	-	-	-	-	-	-	-	-	-	-	-	-	-	-	-	-	-	-	-	-	-
AX-147253886	Araip.B06	130343046	Mag2	-	-	-	-	-	-	-	-	-	-	-	-	-	-	-	-	-	-	-	-	-	-	-	-	-	-	-	-	-	-	-	-	-	-	-	-	-	-	-	-	-	-	-	-	-	-
AX-176792416	Araip.B06	132386862	-	-	-	-	-	-	-	-	-	-	-	-	-	-	-	-	-	-	-	-	-	-	-	-	-	-	-	-	-	-	-	-	-	-	-	-	-	-	-	-	-	-	-	-	-	-	-
AX-147254039	Araip.B06	133321816	-	-	-	-	-	-	-	-	-	-	-	-	-	-	-	-	-	-	-	-	-	-	-	-	-	-	-	-	-	-	-	-	-	-	-	-	-	-	-	-	-	-	-	-	-	-	-
AX-147254041	Araip.B06	133323553	Mag2	-	-	-	-	-	-	-	-	-	-	-	-	-	-	-	-	-	-	-	-	Mag1	-	-	-	-	-	Mag1	-	-	-	-	-	Mag1	-	-	-	-	-	-	-	-	-	-	-	-	-
AX-147254102	Araip.B06	133735471	-	-	-	-	-	-	-	-	-	-	-	-	-	-	-	-	-	-	-	-	-	Mag1	-	-	-	-	-	Mag1	-	-	-	-	-	Mag1	-	-	-	-	-	-	-	-	-	-	-	-	-
AX-147226599	Araip.B06	134109194	Mag2	-	-	-	-	-	-	-	-	-	-	-	-	-	-	Mag1	-	-	-	-	-	Mag1	-	-	-	-	-	Mag1	-	-	-	-	-	Mag1	-	-	-	-	-	-	-	-	-	-	-	-	-
AX-147254191	Araip.B06	135004325	Mag2	-	-	-	-	-	-	-	-	-	-	-	-	-	-	-	-	-	-	-	-	Mag1	-	-	-	-	-	Mag1	-	-	-	-	-	Mag1	-	-	-	-	-	-	-	-	-	-	-	-	-
AX-147254198	Araip.B06	135080269	-	-	-	-	-	-	-	-	-	-	-	-	-	-	-	-	-	-	-	-	-	-	-	-	-	-	-	-	-	-	-	-	-	-	-	-	-	-	-	-	-	-	-	-	-	-	-
AX-147226735	Araip.B06	135770071	Mag2	-	-	-	-	-	-	-	-	-	-	-	-	-	-	-	-	-	-	-	-	Mag1	-	-	-	-	-	Mag1	-	-	-	-	-	Mag1	-	-	-	Mag1	-	-	-	-	-	-	-	-	-
AX-176791829	Araip.B06	135783222	Mag2	-	-	-	-	-	-	-	-	-	-	-	-	-	-	-	-	-	-	-	-	Mag1	-	-	-	-	-	Mag1	-	-	-	-	-	Mag1	-	-	-	Mag1	-	-	-	-	-	-	-	-	-
AX-147226748	Araip.B06	135786569	Mag2	-	-	-	-	-	-	-	-	-	-	-	-	-	-	-	-	-	-	-	-	Mag1	-	-	-	-	-	Mag1	-	-	-	-	-	Mag1	-	-	-	Mag1	-	-	-	-	-	-	-	-	-
AX-147226754	Araip.B06	135787388	Mag1	-	-	-	-	-	-	-	-	-	-	-	-	-	-	-	-	-	-	-	-	Mag1	-	-	-	-	-	Mag1	-	-	-	-	-	Mag1	-	-	-	Mag1	-	-	-	-	-	-	-	-	-
AX-147226756	Araip.B06	135787551	Mag2	-	-	-	-	-	-	-	-	-	-	-	-	-	-	-	-	-	-	-	-	Mag1	-	-	-	-	-	Mag1	-	-	-	-	-	Mag1	-	-	-	Mag1	-	-	-	-	-	-	-	-	-
AX-176815617	Araip.B06	135807278	Mag2	-	-	-	-	-	-	-	-	-	-	-	-	-	-	-	-	-	-	-	-	Mag1	-	-	-	-	-	Mag1	-	-	-	-	-	Mag1	-	-	-	Mag1	-	-	-	-	-	-	-	-	-
AX-147254304	Araip.B07	270626	Mag2	-	-	-	-	-	-	-	-	-	-	-	-	-	-	-	-	-	-	Mag2	-	Mag1	-	-	-	-	-	-	-	-	-	-	-	Mag1	-	-	-	Mag1	-	-	-	-	-	-	-	-	-
AX-147254311	Araip.B07	391523	Mag2	-	-	-	-	-	-	-	-	-	-	-	-	-	-	-	-	-	-	Mag2	-	Mag1	-	-	-	-	-	Mag2	-	-	-	-	-	Mag1	-	-	-	-	-	-	-	-	-	-	-	-	-
AX-147254346	Araip.B07	831840	Mag2	-	-	-	-	-	-	-	-	-	-	-	-	-	-	-	-	-	-	Mag2	-	Mag1	-	-	-	-	-	Mag2	-	-	-	-	-	Mag1	-	-	-	Mag2	-	-	-	-	-	-	-	-	-
AX-176791987	Araip.B07	919868	Mag2	-	-	-	-	-	-	-	-	-	-	-	-	-	-	-	-	-	-	Mag2	-	Mag1	-	-	-	-	-	Mag2	-	-	-	-	-	Mag1	-	-	-	-	-	-	-	-	-	-	-	-	-
AX-147254361	Araip.B07	1015560	Mag1	-	-	-	-	-	-	-	-	-	-	-	-	-	-	-	-	-	-	Mag1	-	Mag1	-	-	-	-	-	Mag1	-	-	-	-	-	-	-	-	-	Mag1	-	-	-	-	-	-	-	-	-
AX-147254365	Araip.B07	1037512	Mag2	-	-	-	-	-	-	-	-	-	-	-	-	-	-	-	-	-	-	Mag2	-	Mag1	-	-	-	-	-	Mag2	-	-	-	-	-	Mag1	-	-	-	Mag2	-	-	-	-	-	-	-	-	-
AX-176792151	Araip.B07	1121226	-	-	-	-	-	-	-	-	-	-	-	-	-	-	-	-	-	-	-	Mag2	-	Mag1	-	-	-	-	-	Mag2	-	-	-	-	-	Mag1	-	-	-	Mag1	-	-	-	-	-	-	-	-	-
AX-177641448	Araip.B07	1369152	Mag2	-	-	-	-	-	-	-	-	-	-	-	-	-	-	-	-	-	-	Mag2	-	Mag1	-	-	-	-	-	Mag2	-	-	-	-	-	Mag1	-	-	-	Mag2	-	-	-	-	-	-	-	-	-
AX-176791822	Araip.B07	2671333	Mag1	-	-	-	-	-	-	-	-	-	-	-	-	-	-	-	-	Mag1	-	Mag2	-	Mag1	-	-	-	-	-	Mag1	-	-	-	-	-	Mag2	-	-	-	Mag2	-	-	-	-	-	-	-	-	-
AX-147227165	Araip.B07	3073847	Mag1	-	-	-	-	-	-	-	-	-	-	-	-	-	-	-	-	-	-	Mag2	-	Mag1	-	-	-	-	-	Mag2	-	-	-	-	-	Mag2	-	-	-	Mag2	-	-	-	-	-	-	-	-	-
AX-147254570	Araip.B07	3080948	Mag2	-	-	-	-	-	-	-	-	-	-	-	-	-	-	-	-	-	-	Mag2	-	Mag1	-	-	-	-	-	Mag2	-	-	-	-	-	Mag2	-	-	-	Mag2	-	-	-	-	-	-	-	-	-
AX-147254586	Araip.B07	3309551	Mag1	-	-	-	-	-	-	-	-	-	-	-	-	-	-	-	Mag1	-	-	-	-	-	-	-	Mag1	-	Mag1	-	Mag1	-	Mag1	-	Mag1	Mag1	-	-	-	-	-	-	-	-	-	-	-	-	-
AX-147254636	Araip.B07	3941261	Mag2	-	-	-	-	-	-	-	-	-	-	-	-	-	-	-	-	-	-	Mag2	-	Mag1	-	-	-	-	-	Mag2	-	-	-	-	-	Mag2	-	-	-	Mag2	-	-	-	-	-	-	-	-	-
AX-147254688	Araip.B07	4382301	Mag2	-	-	-	-	-	-	-	-	-	-	-	-	-	-	-	-	-	-	Mag2	-	Mag1	Mag1	-	-	-	-	Mag2	-	-	-	-	-	Mag2	-	Mag1	-	Mag2	-	-	-	-	-	-	-	-	-
AX-147254706	Araip.B07	4673512	Mag2	-	Mag1	-	Mag1	-	Mag1	-	Mag1	-	Mag1	-	Mag2	-	Mag1	-	Mag1	-	-	Mag2	-	Mag1	-	-	-	-	-	Mag2	-	-	-	-	-	Mag2	-	Mag1	-	Mag2	Mag1	-	Mag2	-	Mag1	-	Mag1	-	Mag1
AX-147254725	Araip.B07	5155467	Mag2	-	Mag1	-	Mag1	-	Mag1	-	Mag1	-	Mag1	-	Mag2	-	Mag1	-	Mag1	-	-	Mag2	-	Mag1	-	-	-	-	-	Mag2	-	-	-	-	-	Mag2	-	Mag1	-	-	Mag1	-	Mag2	-	Mag1	-	Mag1	-	Mag1
AX-147254792	Araip.B07	5966992	Mag2	-	Mag1	-	Mag1	-	Mag1	-	Mag1	-	Mag1	-	Mag2	-	Mag1	-	Mag1	-	-	Mag2	-	Mag1	-	-	-	-	-	Mag2	-	-	-	-	-	Mag2	-	Mag1	-	Mag2	Mag1	-	Mag2	-	Mag1	-	Mag1	-	Mag1
AX-147254826	Araip.B07	6386807	Mag2	-	Mag1	-	Mag1	-	Mag1	-	Mag1	-	Mag1	-	Mag2	-	Mag1	-	-	-	-	Mag2	-	Mag1	-	-	-	-	-	Mag2	-	-	-	-	-	Mag2	-	Mag1	-	-	Mag1	-	Mag2	-	Mag1	-	Mag1	-	Mag1
AX-147254849	Araip.B07	6688891	Mag2	-	Mag1	-	Mag1	-	Mag1	-	Mag1	-	Mag1	-	Mag2	-	Mag1	-	-	-	-	Mag2	-	Mag1	-	-	-	-	-	Mag2	-	-	-	-	-	Mag2	-	Mag1	-	Mag1	Mag1	-	Mag2	-	Mag1	-	Mag1	-	Mag1
AX-147254864	Araip.B07	7278391	Mag2	-	Mag1	-	Mag1	-	Mag1	-	Mag1	-	Mag1	-	Mag2	-	Mag1	-	-	-	-	Mag2	-	Mag1	-	-	-	-	-	Mag2	-	-	-	-	-	Mag2	-	Mag1	-	Mag2	Mag1	-	Mag2	-	Mag1	-	Mag1	-	Mag1
AX-147254891	Araip.B07	8538334	Mag2	-	Mag1	-	Mag1	-	Mag1	-	Mag1	-	Mag1	-	Mag2	-	Mag1	-	-	-	-	Mag2	-	Mag1	-	-	-	-	-	Mag2	-	-	-	-	-	Mag2	-	Mag1	-	-	Mag1	-	Mag2	-	Mag1	-	Mag1	-	Mag1
AX-147255209	Araip.B07	18647940	Mag2	-	Mag1	-	Mag1	-	Mag1	-	Mag1	-	Mag1	-	Mag2	-	Mag1	-	-	-	-	Mag1	-	Mag1	-	-	-	-	-	-	-	Mag1	-	Mag1	-	Mag2	-	Mag1	-	Mag1	Mag1	-	Mag2	-	Mag1	-	Mag1	-	Mag1
AX-176823337	Araip.B07	19639295	-	-	-	-	Mag1	-	Mag1	-	Mag1	-	Mag1	-	Mag1	-	Mag1	-	-	-	-	Mag1	-	Mag1	-	-	-	-	-	-	-	Mag1	-	Mag1	-	Mag2	-	Mag1	-	Mag1	Mag1	-	Mag1	-	Mag1	-	Mag1	-	Mag1
AX-177640563	Araip.B07	22555654	Mag1	-	-	-	-	-	-	-	-	-	-	-	-	-	-	-	-	-	-	-	-	-	-	-	-	-	-	-	-	-	-	-	-	-	-	-	-	-	-	-	-	-	-	-	-	-	-
AX-176815482	Araip.B07	25617087	-	-	-	-	-	-	-	-	-	-	-	-	-	-	-	-	-	-	-	-	-	-	Mag1	-	-	-	-	-	-	-	-	-	-	-	-	-	-	-	-	-	-	-	-	-	-	-	-
AX-147255407	Araip.B07	27113953	Mag2	-	Mag1	-	Mag2	-	Mag1	-	Mag1	-	Mag1	-	Mag2	-	Mag1	-	-	-	-	Mag1	-	Mag1	-	Mag1	-	Mag1	-	-	-	Mag1	-	Mag1	-	Mag2	-	-	-	Mag1	Mag1	-	Mag2	-	Mag1	-	Mag1	-	Mag1
AX-147255421	Araip.B07	27860283	Mag2	-	Mag1	-	Mag2	-	Mag1	-	Mag1	-	Mag1	-	Mag2	-	Mag1	-	-	-	-	Mag1	-	Mag1	-	Mag1	-	Mag1	-	-	-	Mag1	-	Mag1	-	Mag2	-	-	-	Mag1	Mag1	-	Mag2	-	Mag1	-	Mag1	-	Mag1
AX-147255423	Araip.B07	27913643	-	-	-	-	-	-	-	-	-	-	-	-	-	-	-	-	-	-	-	-	-	-	-	-	-	-	-	-	-	-	-	-	-	-	-	-	-	-	-	-	-	-	-	-	-	-	-
AX-177637996	Araip.B07	28573469	Mag1	-	-	-	Mag1	-	Mag1	Mag1	-	-	-	Mag1	-	-	-	-	-	-	-	Mag1	Mag1	Mag1	-	Mag1	-	Mag1	-	Mag1	Mag1	Mag1	-	Mag1	-	Mag1	-	-	-	Mag1	Mag1	-	Mag1	-	Mag1	-	-	Mag1	Mag1
AX-176791431	Araip.B07	31648456	Mag1	-	-	-	Mag1	-	-	-	-	-	Mag1	-	Mag1	-	-	-	-	-	-	-	-	Mag1	-	-	-	Mag1	-	-	-	Mag1	-	Mag1	-	Mag1	-	-	-	-	Mag1	-	Mag1	-	-	-	-	-	Mag1
AX-147255541	Araip.B07	33022904	Mag2	-	Mag1	-	Mag2	-	Mag1	-	Mag1	-	Mag1	-	Mag2	-	Mag1	-	-	-	-	Mag1	-	Mag1	-	Mag1	-	Mag1	-	-	-	Mag1	-	Mag1	-	Mag2	-	-	-	Mag1	Mag1	-	Mag2	-	Mag1	-	Mag1	-	Mag1
AX-147255543	Araip.B07	33024607	Mag1	-	-	-	-	-	-	-	-	-	-	-	-	-	-	-	-	-	-	-	-	-	Mag1	-	-	-	-	-	-	-	-	-	-	-	-	-	-	-	-	-	-	-	-	-	-	-	-
AX-147255574	Araip.B07	35115883	-	-	-	-	-	-	-	-	-	-	-	-	-	-	-	-	-	-	-	-	-	-	-	-	-	-	-	-	-	-	-	-	-	-	-	-	-	-	-	-	-	-	-	-	-	-	-
AX-176791990	Araip.B07	36741839	Mag2	-	Mag1	-	Mag2	-	Mag1	-	Mag1	-	Mag1	-	Mag2	-	Mag1	-	-	-	-	Mag1	-	Mag1	-	Mag1	-	Mag1	-	-	-	Mag1	-	Mag1	-	Mag2	-	-	-	Mag1	Mag1	-	Mag2	-	Mag1	-	Mag1	-	Mag1
AX-147255657	Araip.B07	40161223	Mag2	-	Mag1	-	Mag2	-	Mag1	-	Mag1	-	Mag1	-	Mag2	-	Mag1	-	-	-	-	Mag1	-	Mag1	-	Mag1	-	Mag1	-	-	-	Mag1	-	Mag1	-	Mag2	-	-	-	Mag1	Mag1	-	Mag2	-	Mag1	-	Mag1	-	Mag1
AX-176793516	Araip.B07	60334470	-	-	-	-	-	-	-	-	-	-	-	-	-	-	-	-	-	-	-	-	-	-	-	-	-	-	-	-	-	-	-	-	-	-	-	-	-	-	-	-	-	-	-	-	-	-	-
AX-177639629	Araip.B07	69647597	-	-	-	-	-	-	-	-	-	-	-	-	-	-	-	-	-	-	-	-	-	-	-	-	-	-	-	-	-	-	-	-	-	-	-	-	-	-	-	-	-	-	-	-	-	-	-
AX-147229326	Araip.B07	95988526	Mag1	-	-	-	-	-	-	-	-	-	-	-	-	-	-	-	-	-	-	-	-	-	-	-	-	-	-	-	-	-	-	-	-	-	-	-	-	-	-	-	-	-	-	-	-	-	-
AX-177638127	Araip.B07	98978807	Mag1	-	Mag1	-	Mag2	-	Mag1	-	Mag1	-	Mag1	-	Mag2	-	Mag1	-	-	-	-	Mag1	-	Mag1	-	Mag1	-	Mag1	-	-	-	Mag1	-	Mag1	-	Mag2	-	-	-	Mag1	Mag1	-	Mag2	-	Mag1	-	Mag1	-	Mag1
AX-177641518	Araip.B07	104036917	Mag2	-	Mag1	-	Mag2	-	Mag1	-	Mag1	-	Mag1	-	Mag2	-	Mag1	-	-	-	-	Mag1	-	Mag1	-	Mag1	-	Mag1	-	-	-	Mag1	-	Mag1	-	Mag2	-	-	-	Mag1	Mag1	-	Mag2	-	Mag1	-	Mag1	-	-
AX-177638940	Araip.B07	104608397	-	-	-	-	-	-	-	-	-	-	-	-	-	-	-	-	-	-	-	-	-	-	-	-	-	-	-	-	-	-	-	-	-	-	-	-	-	-	-	-	-	-	-	-	-	-	-
AX-147256076	Araip.B07	105566627	Mag2	-	Mag1	-	Mag2	-	Mag1	-	Mag1	-	Mag1	-	Mag2	-	Mag1	-	-	-	-	Mag1	-	Mag1	-	Mag1	-	Mag1	-	-	-	Mag1	-	Mag1	-	Mag2	-	-	-	Mag1	Mag1	-	Mag2	-	Mag1	-	Mag1	-	Mag1
AX-176821297	Araip.B07	105872336	Mag1	-	-	-	-	-	-	-	-	-	-	-	-	-	-	-	-	-	-	-	-	-	-	-	-	-	-	-	-	-	-	-	-	-	-	-	-	-	-	-	-	-	-	-	-	-	-
AX-147256109	Araip.B07	106774615	-	-	Mag1	-	-	-	Mag1	-	Mag1	-	Mag1	-	Mag2	-	Mag1	-	-	-	-	Mag1	-	Mag1	-	Mag1	-	Mag1	-	-	-	Mag1	-	Mag1	-	Mag2	-	-	-	Mag1	Mag1	-	Mag2	-	Mag1	-	Mag1	-	Mag1
AX-176793978	Araip.B07	106851423	Mag2	-	Mag2	-	Mag1	-	Mag1	-	Mag1	-	Mag1	-	Mag2	-	-	-	-	-	-	Mag1	-	Mag1	-	Mag1	-	Mag1	-	-	-	Mag1	-	Mag1	-	Mag2	-	-	-	Mag1	Mag1	-	Mag2	-	Mag2	-	Mag2	-	Mag1
AX-176804480	Araip.B07	106851536	Mag2	-	Mag1	-	Mag2	-	Mag1	-	Mag1	-	-	-	Mag2	-	Mag1	-	-	-	-	Mag1	-	Mag1	-	Mag1	-	Mag1	-	-	-	Mag1	-	Mag1	-	Mag2	-	-	-	Mag1	Mag1	-	Mag2	-	Mag1	-	Mag1	-	Mag1
AX-176814221	Araip.B07	106851564	Mag2	-	Mag1	-	Mag2	-	Mag1	-	Mag1	-	Mag1	-	Mag2	-	Mag1	-	-	-	-	-	-	Mag1	-	Mag1	-	Mag1	-	-	-	Mag1	-	Mag1	-	Mag2	-	-	-	Mag1	Mag1	-	Mag2	-	-	-	Mag1	-	Mag1
AX-147229545	Araip.B07	111244066	-	-	-	-	-	-	-	-	-	-	-	-	-	-	-	-	-	-	-	-	-	-	-	-	-	-	-	-	-	-	-	-	-	-	-	-	-	-	-	-	-	-	-	-	-	-	-
AX-176806568	Araip.B07	113297618	-	-	Mag1	-	Mag2	-	Mag1	-	Mag1	-	Mag1	-	-	-	Mag1	-	-	-	-	Mag1	-	Mag1	-	Mag1	-	Mag1	-	-	-	Mag1	-	Mag1	-	Mag2	-	-	-	-	Mag1	-	-	-	Mag1	-	Mag1	-	Mag2
AX-147256330	Araip.B07	114323477	Mag2	-	Mag1	-	Mag2	-	Mag1	-	Mag1	-	Mag1	-	Mag2	-	Mag1	-	-	-	-	Mag1	-	Mag1	-	Mag1	-	Mag1	-	-	-	Mag1	-	Mag1	-	Mag2	-	-	-	Mag1	Mag1	-	Mag2	-	Mag1	-	Mag1	-	Mag1
AX-147256340	Araip.B07	114490353	Mag2	-	Mag1	-	Mag2	-	Mag1	-	Mag1	-	Mag1	-	Mag2	-	Mag1	-	-	-	-	Mag1	-	Mag1	-	Mag1	-	Mag1	-	-	-	Mag1	-	Mag1	-	Mag2	-	-	-	Mag1	Mag1	-	Mag2	-	Mag1	-	Mag1	-	Mag1
AX-176812607	Araip.B07	115507678	-	-	-	-	-	-	-	-	-	-	-	-	-	-	-	-	-	-	-	-	-	-	-	-	-	-	-	-	-	-	-	-	-	-	-	-	-	-	-	-	-	-	-	-	-	-	-
AX-147256405	Araip.B07	116350309	-	-	Mag1	-	Mag2	-	Mag1	-	Mag1	-	Mag1	-	Mag2	-	Mag1	-	-	-	-	Mag1	-	Mag1	-	Mag1	-	Mag1	-	-	-	Mag1	-	Mag1	-	Mag2	-	-	-	Mag1	Mag1	-	Mag2	-	Mag1	-	Mag1	-	Mag1
AX-147256413	Araip.B07	116532475	Mag2	-	Mag1	-	Mag2	-	Mag1	-	Mag1	-	Mag1	-	Mag2	-	Mag1	-	-	-	-	Mag1	-	Mag1	-	Mag1	-	Mag1	-	-	-	Mag1	-	Mag1	-	Mag2	-	-	-	Mag1	Mag1	-	Mag2	-	Mag1	-	Mag1	-	Mag1
AX-147256449	Araip.B07	117675646	Mag2	-	Mag1	-	Mag2	-	Mag1	-	Mag1	-	Mag1	-	Mag2	-	Mag1	-	-	-	-	Mag1	-	Mag1	-	Mag1	-	Mag1	-	-	-	Mag1	-	Mag1	-	Mag2	-	-	-	Mag1	Mag1	-	Mag2	-	Mag1	-	Mag1	-	Mag1
AX-177640874	Araip.B07	118405970	Mag2	-	-	-	-	-	-	-	-	-	-	-	-	-	-	-	-	-	-	Mag1	-	Mag1	-	Mag1	-	Mag1	-	-	-	Mag1	-	Mag1	-	Mag2	-	-	-	-	-	-	-	-	-	-	-	-	-
AX-147256496	Araip.B07	118840051	Mag2	-	-	-	-	-	-	-	-	-	-	-	-	-	-	-	-	-	-	Mag1	-	Mag1	-	Mag1	-	Mag1	-	-	-	Mag1	-	Mag1	-	Mag2	-	-	-	Mag1	-	-	-	-	-	-	-	-	-
AX-176823719	Araip.B07	118843481	-	-	-	-	-	-	-	-	-	-	-	-	-	-	-	-	-	-	-	Mag1	-	Mag1	-	Mag1	-	Mag1	-	-	-	Mag1	-	Mag1	-	Mag2	-	-	-	Mag1	-	-	-	-	-	-	-	-	-
AX-147256506	Araip.B07	119146521	-	-	-	-	-	-	-	-	-	-	-	-	-	-	-	-	-	-	-	Mag1	-	Mag1	-	Mag1	-	Mag1	-	-	-	Mag1	-	Mag1	-	Mag2	-	-	-	Mag1	-	-	-	-	-	-	-	-	-
AX-147229878	Araip.B07	120267615	-	-	Mag1	-	-	Mag1	Mag1	Mag2	Mag1	-	Mag1	-	Mag1	Mag1	-	Mag1	-	Mag1	Mag2	-	Mag1	Mag1	-	Mag1	-	-	Mag1	-	-	Mag1	-	-	Mag1	-	-	-	-	-	-	Mag1	-	Mag1	Mag2	Mag1	Mag1	Mag1	Mag1
AX-147256570	Araip.B07	120558364	Mag2	-	-	-	-	-	-	-	-	-	-	-	-	-	-	-	-	-	-	Mag1	-	Mag1	-	Mag1	-	Mag1	-	-	-	Mag2	-	Mag2	-	Mag1	-	-	-	Mag1	-	-	-	-	-	-	-	-	-
AX-176817880	Araip.B07	120684461	-	-	-	-	-	-	-	-	-	-	-	-	-	-	-	-	-	-	-	-	-	-	-	-	-	-	-	-	-	-	-	-	-	-	-	-	-	-	-	-	-	-	-	-	-	-	-
AX-176791974	Araip.B07	121786584	Mag2	-	-	-	-	-	-	-	-	-	-	-	-	-	-	-	-	-	-	Mag1	-	-	-	Mag1	-	Mag1	-	-	-	Mag2	-	Mag2	-	Mag1	-	-	-	Mag1	-	-	-	-	-	-	-	-	-
AX-147256628	Araip.B07	121936175	-	-	-	-	-	-	-	-	-	-	-	-	-	-	-	-	-	-	-	Mag1	-	-	-	Mag1	Mag1	-	-	-	-	Mag2	-	Mag2	-	Mag1	-	-	-	Mag1	-	-	-	-	-	-	-	-	-
AX-147256658	Araip.B07	122415857	-	-	-	-	-	-	-	-	-	-	-	-	-	-	-	-	-	-	-	Mag1	-	-	-	Mag1	-	Mag1	-	-	-	Mag2	-	Mag2	-	Mag1	-	-	-	Mag1	-	-	-	-	-	-	-	-	-
AX-147256681	Araip.B07	122864685	Mag2	-	-	-	-	-	-	-	-	-	-	-	-	-	-	-	-	-	-	Mag1	-	-	-	Mag1	-	Mag1	-	-	-	Mag2	-	Mag2	-	Mag1	-	-	-	Mag1	-	-	-	-	-	-	-	-	-
AX-147256698	Araip.B07	122997921	Mag2	-	-	-	-	-	-	-	-	-	-	-	-	-	-	-	-	-	-	Mag1	-	-	-	Mag1	-	Mag1	-	-	-	Mag2	-	Mag2	-	Mag1	-	-	-	Mag1	-	-	-	-	-	-	-	-	-
AX-147256704	Araip.B07	123068995	Mag2	-	-	-	-	-	-	-	-	-	-	-	-	-	-	-	-	-	-	Mag1	-	-	-	Mag1	-	Mag1	-	-	-	Mag2	-	Mag2	-	Mag1	-	-	-	Mag1	-	-	-	-	-	-	-	-	-
AX-147256721	Araip.B07	123241444	Mag2	-	-	-	-	-	-	-	-	-	-	-	-	-	-	-	-	-	-	Mag1	-	-	-	Mag1	-	Mag1	-	-	-	Mag2	-	Mag2	-	Mag1	-	-	-	Mag1	-	-	-	-	-	-	-	-	-
AX-147256773	Araip.B07	124014849	Mag2	-	-	-	-	-	-	-	-	-	-	-	-	-	-	-	-	-	-	Mag1	-	-	-	Mag1	-	Mag1	-	-	-	Mag2	-	Mag2	-	Mag1	-	-	-	Mag1	-	-	-	-	-	-	-	-	-
AX-147256778	Araip.B07	124151442	Mag2	-	-	-	-	-	-	-	-	-	-	-	-	-	-	-	-	-	-	Mag1	-	-	-	Mag1	-	Mag1	-	-	-	Mag2	-	Mag2	-	Mag1	-	-	-	Mag1	-	-	-	-	-	-	-	-	-
AX-147256817	Araip.B07	124642564	Mag2	-	-	-	-	-	-	-	-	-	-	-	-	-	-	-	-	-	-	Mag1	-	-	-	Mag1	-	Mag1	-	-	-	Mag2	-	Mag2	-	Mag1	-	-	-	Mag1	-	-	-	-	-	-	-	-	-
AX-176791477	Araip.B07	124806514	Mag2	-	-	-	-	-	-	-	-	-	-	-	-	-	-	-	-	-	-	Mag1	-	-	-	Mag1	-	Mag1	-	-	-	Mag2	-	Mag2	-	Mag1	-	-	-	Mag1	-	-	-	-	-	-	-	-	-
AX-147256831	Araip.B07	124808289	Mag2	-	-	-	-	-	-	-	-	-	-	-	-	-	-	-	-	-	-	Mag1	-	-	-	Mag1	-	Mag1	-	-	-	Mag2	-	Mag2	-	Mag1	-	-	-	Mag1	-	-	-	-	-	-	-	-	-
AX-147256840	Araip.B07	124938031	-	-	-	-	-	-	-	-	-	-	-	-	-	-	-	-	-	-	-	-	-	-	-	-	-	-	-	-	-	-	-	-	-	-	-	-	-	-	-	-	-	-	-	-	-	-	-
AX-147256871	Araip.B07	125572052	Mag2	-	-	-	-	-	-	-	-	-	-	-	-	-	-	-	-	-	-	Mag1	-	-	-	Mag1	-	Mag1	-	Mag1	-	Mag2	-	Mag2	-	Mag1	-	-	-	Mag1	-	-	-	-	-	-	-	-	-
AX-147256877	Araip.B07	125624042	Mag2	-	-	-	-	-	-	-	-	-	-	-	-	-	-	-	-	-	-	Mag1	-	-	-	Mag1	-	Mag1	-	Mag1	-	Mag2	-	Mag2	-	Mag1	-	-	-	Mag1	-	-	-	-	-	-	-	-	-
AX-147256898	Araip.B07	125925487	Mag2	-	-	-	-	-	-	-	-	-	-	-	-	-	-	-	-	-	-	Mag1	-	-	-	Mag1	-	Mag1	-	Mag1	-	Mag2	-	Mag2	-	Mag1	-	-	-	Mag1	-	-	-	-	-	-	-	-	-
AX-147256922	Araip.B08	60902	Mag1	-	Mag1	-	-	-	Mag1	-	Mag2	-	Mag2	-	Mag2	-	-	-	Mag1	-	-	-	-	-	-	-	-	-	-	-	-	-	-	-	-	-	-	-	-	-	-	-	Mag2	-	Mag2	-	Mag1	-	Mag1
AX-147256928	Araip.B08	298197	Mag1	-	Mag1	-	-	-	Mag1	-	Mag2	-	Mag2	-	Mag2	-	-	-	Mag1	-	-	-	-	-	-	-	-	-	-	-	-	-	-	-	-	-	-	-	-	-	-	-	Mag2	-	Mag2	-	Mag1	-	Mag1
AX-177643680	Araip.B08	1067792	Mag1	-	Mag1	-	-	-	Mag1	-	Mag1	-	Mag1	-	Mag1	-	-	-	Mag1	-	-	-	-	-	-	-	-	-	-	-	-	-	-	-	-	-	-	-	-	-	-	-	Mag1	-	Mag1	-	Mag1	-	Mag1
AX-147257032	Araip.B08	1194269	Mag2	-	Mag1	-	-	-	Mag1	-	Mag2	-	Mag2	-	Mag2	-	-	-	Mag1	-	-	-	-	-	-	-	-	-	-	-	-	-	-	-	-	-	-	-	-	-	-	-	Mag2	-	Mag2	-	Mag1	-	Mag1
AX-177644636	Araip.B08	1345574	Mag2	-	Mag1	-	-	-	Mag1	-	Mag2	-	Mag2	-	Mag2	-	-	-	Mag1	-	-	-	-	-	-	-	-	-	-	-	-	-	-	-	-	-	-	-	-	-	-	-	Mag2	-	Mag2	-	Mag1	-	Mag1
AX-176801554	Araip.B08	1895781	Mag2	-	-	-	-	-	-	-	-	-	-	-	-	-	-	-	-	-	-	-	-	-	-	-	-	-	-	-	-	-	-	-	-	-	-	-	-	-	-	-	-	-	-	-	-	-	-
AX-147257139	Araip.B08	2233615	Mag1	-	-	-	-	-	-	-	-	-	-	-	-	-	-	-	-	-	-	-	-	-	-	-	-	-	-	-	-	-	-	-	-	-	-	-	-	-	-	-	-	-	-	-	-	-	-
AX-147257178	Araip.B08	2454730	Mag2	-	-	-	-	-	-	-	-	-	-	-	-	-	-	-	-	-	-	-	-	-	-	-	-	-	-	-	-	-	-	-	-	-	-	-	-	-	-	-	-	-	-	-	-	-	-
AX-176791885	Araip.B08	2578207	Mag1	-	-	-	-	-	-	-	-	-	-	-	-	-	-	-	-	-	-	-	-	-	-	-	-	-	-	-	-	-	-	-	-	-	-	-	-	-	-	-	-	-	-	-	-	-	-
AX-147257243	Araip.B08	3136502	Mag2	-	-	-	-	-	-	-	-	-	-	-	-	-	-	-	-	-	-	-	-	-	-	-	-	-	-	-	-	-	-	-	-	-	-	-	-	-	-	-	-	-	-	-	-	-	-
AX-147257262	Araip.B08	3465897	Mag2	-	-	Mag1	-	-	-	Mag2	-	Mag1	-	Mag1	-	Mag1	-	Mag1	-	Mag1	-	-	-	-	-	-	-	-	-	-	-	-	-	-	-	-	-	-	-	-	-	Mag2	-	Mag2	-	Mag1	-	Mag1	-
AX-176791821	Araip.B08	3524052	Mag2	-	-	Mag1	-	-	-	Mag2	-	Mag1	-	Mag1	-	Mag1	-	Mag1	-	Mag1	-	-	-	-	-	-	-	-	-	-	-	-	-	-	-	-	-	-	-	-	-	Mag2	-	Mag2	-	Mag1	-	Mag1	-
AX-147257270	Araip.B08	3608931	Mag2	-	-	Mag1	-	-	-	Mag2	-	Mag1	-	Mag1	-	Mag1	-	Mag1	-	Mag1	-	-	-	-	-	-	-	-	-	-	-	-	-	-	-	-	-	-	-	-	-	Mag2	-	Mag2	-	Mag1	-	Mag1	-
AX-176791743	Araip.B08	4769423	Mag2	-	-	Mag1	-	-	-	Mag2	-	Mag1	-	Mag1	-	Mag1	-	Mag1	-	Mag1	Mag1	-	-	-	-	-	-	-	-	-	Mag2	-	-	-	Mag1	-	Mag2	-	-	-	-	Mag2	-	Mag2	-	Mag1	-	-	-
AX-177643426	Araip.B08	5678750	Mag1	-	-	-	-	-	-	-	-	-	-	-	-	-	-	-	-	-	-	-	-	-	-	-	-	-	-	-	-	-	-	-	-	-	-	-	-	-	-	-	-	-	-	-	-	-	-
AX-147257458	Araip.B08	6300409	Mag2	-	-	-	-	-	-	Mag2	-	Mag1	-	-	-	-	-	Mag1	-	Mag1	Mag1	-	-	-	Mag1	-	-	-	-	-	Mag1	-	-	-	Mag1	-	Mag1	-	-	-	-	Mag2	-	Mag2	-	-	-	-	-
AX-147257470	Araip.B08	6406730	Mag2	-	-	Mag1	-	-	-	Mag2	-	Mag1	-	-	-	Mag1	-	Mag1	-	Mag1	Mag1	-	-	-	-	-	-	-	-	-	Mag2	-	-	-	Mag1	-	Mag2	-	-	-	-	Mag2	-	Mag2	-	-	-	-	-
AX-147257484	Araip.B08	6642505	Mag2	-	-	Mag1	-	-	-	Mag2	-	Mag1	-	-	-	Mag1	-	Mag1	-	Mag1	Mag1	-	-	-	Mag1	-	-	-	-	-	Mag2	-	-	-	Mag1	-	Mag2	-	-	-	-	Mag2	-	Mag2	-	-	-	-	-
AX-177642834	Araip.B08	7259589	Mag2	-	-	-	-	-	-	Mag2	-	Mag1	-	-	-	Mag1	-	Mag1	-	Mag1	Mag1	Mag2	-	Mag1	-	Mag1	-	Mag1	-	Mag1	Mag2	Mag1	-	Mag1	Mag1	Mag1	Mag2	Mag1	-	Mag1	-	Mag2	-	Mag2	-	-	-	-	-
AX-147257516	Araip.B08	7439204	Mag1	-	-	Mag1	-	-	-	Mag2	-	Mag1	-	-	-	Mag1	-	Mag1	-	Mag1	Mag1	Mag2	-	Mag1	Mag1	Mag1	-	Mag1	-	Mag1	Mag2	Mag1	-	Mag1	Mag1	Mag1	Mag2	Mag1	-	Mag1	-	Mag2	-	Mag2	-	-	-	-	-
AX-176823225	Araip.B08	7798891	Mag2	-	-	Mag1	-	-	-	Mag2	-	Mag1	-	-	-	Mag1	-	Mag1	-	Mag1	Mag1	Mag2	-	Mag1	-	Mag1	-	Mag1	-	Mag1	Mag2	Mag1	-	Mag1	Mag1	Mag1	Mag2	Mag1	-	Mag1	-	Mag2	-	Mag2	-	-	-	-	-
AX-147257729	Araip.B08	13636051	-	-	-	Mag1	-	-	-	-	-	Mag1	-	-	-	Mag1	-	Mag1	-	Mag1	Mag1	Mag2	Mag1	Mag1	Mag2	Mag1	-	Mag1	-	Mag1	Mag2	Mag1	-	Mag1	Mag1	Mag1	Mag2	Mag1	Mag1	Mag1	-	Mag2	-	Mag2	-	-	-	-	-
AX-176806766	Araip.B08	15969665	Mag2	-	Mag2	-	-	-	Mag1	Mag2	Mag1	Mag1	Mag1	-	Mag2	Mag1	-	Mag1	Mag1	Mag1	Mag1	-	Mag1	Mag1	Mag1	Mag1	-	Mag1	-	Mag1	Mag2	Mag1	-	Mag1	Mag1	Mag1	Mag2	Mag1	Mag1	Mag1	-	-	Mag2	Mag2	Mag1	-	Mag2	-	Mag1
AX-176819410	Araip.B08	15974491	Mag2	-	Mag2	Mag1	-	-	Mag1	-	Mag1	-	Mag1	-	-	Mag1	Mag1	Mag1	Mag1	Mag1	Mag1	Mag2	Mag1	Mag1	Mag1	Mag1	-	Mag1	-	Mag1	Mag2	Mag1	-	Mag1	-	Mag1	-	Mag1	-	Mag1	-	Mag2	-	Mag2	Mag1	-	Mag2	-	Mag1
AX-176808584	Araip.B08	15975986	Mag2	-	Mag2	Mag2	-	-	Mag2	Mag2	Mag2	Mag2	Mag2	Mag1	Mag2	Mag2	Mag2	Mag2	Mag2	Mag2	Mag2	Mag2	Mag2	Mag2	Mag2	Mag2	-	Mag2	Mag1	Mag2	Mag2	Mag2	Mag1	Mag2	Mag2	Mag2	Mag2	Mag2	Mag2	Mag2	-	Mag2	Mag2	Mag2	Mag2	-	Mag2	-	Mag2
AX-176809193	Araip.B08	15979205	Mag2	-	Mag2	Mag1	-	-	Mag1	Mag2	Mag1	Mag1	Mag1	-	Mag2	-	Mag1	Mag1	Mag1	Mag1	Mag1	-	Mag1	Mag1	Mag1	Mag1	-	Mag1	-	Mag1	Mag2	Mag1	-	Mag1	Mag1	Mag1	-	Mag1	Mag1	Mag1	-	Mag2	Mag2	-	Mag1	-	Mag2	-	-
AX-176807298	Araip.B08	16126958	-	-	Mag2	Mag1	-	-	Mag1	Mag2	Mag1	Mag1	Mag1	-	Mag2	Mag1	Mag1	Mag1	Mag1	Mag1	Mag1	Mag2	Mag1	Mag1	Mag1	Mag1	-	Mag1	-	Mag1	Mag2	Mag1	-	Mag1	Mag1	Mag1	Mag2	Mag1	Mag1	Mag1	-	Mag2	Mag2	Mag2	Mag1	-	Mag2	-	Mag1
AX-147257828	Araip.B08	17906817	Mag2	-	Mag2	Mag1	-	-	Mag1	Mag2	Mag1	Mag1	Mag1	-	Mag2	Mag1	Mag1	Mag1	Mag1	Mag1	Mag1	Mag2	Mag1	Mag1	Mag1	Mag1	-	Mag1	-	Mag1	Mag2	Mag1	-	Mag1	Mag1	Mag1	Mag2	Mag1	Mag1	Mag1	-	Mag2	Mag2	Mag2	Mag1	-	Mag2	-	Mag1
AX-177638002	Araip.B08	19573502	-	-	-	-	-	-	-	-	-	-	-	-	-	-	-	-	-	-	-	-	-	-	-	-	-	-	-	-	-	-	-	-	-	-	-	-	-	-	-	-	-	-	-	-	-	-	-
AX-147257868	Araip.B08	19625060	Mag1	-	-	-	-	-	-	-	-	-	-	-	-	-	Mag1	-	-	-	-	-	-	-	-	-	-	-	-	-	-	-	-	-	-	-	-	-	-	-	-	-	-	-	Mag1	-	-	-	-
AX-147257934	Araip.B08	21828533	Mag2	-	Mag2	-	-	-	Mag2	Mag2	Mag1	Mag1	Mag1	-	Mag2	Mag1	Mag1	Mag1	Mag1	Mag1	Mag1	Mag2	Mag1	Mag1	-	Mag1	Mag1	Mag1	Mag1	-	Mag2	Mag1	-	Mag1	Mag1	Mag1	Mag2	Mag1	Mag1	Mag1	-	Mag2	Mag2	Mag2	Mag1	-	Mag2	-	-
AX-147257993	Araip.B08	23833277	Mag2	-	Mag2	Mag1	-	-	Mag2	Mag2	Mag1	Mag1	Mag1	-	Mag2	Mag1	Mag1	Mag1	Mag1	Mag1	Mag1	Mag2	Mag1	Mag1	Mag1	Mag1	Mag1	Mag1	Mag1	Mag1	Mag2	Mag1	-	Mag1	Mag1	Mag1	Mag2	Mag1	Mag1	Mag1	-	Mag2	Mag2	Mag2	Mag1	-	Mag2	-	Mag1
AX-177640112	Araip.B08	25534918	Mag1	-	Mag2	Mag1	-	-	Mag2	Mag2	Mag1	Mag1	Mag1	-	Mag2	Mag1	Mag1	Mag1	Mag1	Mag1	Mag1	Mag2	Mag1	Mag1	Mag1	-	Mag1	Mag1	Mag1	Mag1	Mag2	Mag1	-	Mag1	Mag1	Mag1	Mag2	Mag1	Mag1	Mag1	-	Mag2	Mag2	Mag2	Mag1	-	Mag2	-	Mag1
AX-147258047	Araip.B08	26013615	Mag2	-	Mag2	Mag1	-	-	Mag2	Mag2	Mag1	Mag1	Mag1	-	Mag2	Mag1	Mag1	Mag1	Mag1	Mag1	Mag1	Mag2	Mag1	Mag1	Mag1	Mag1	Mag1	Mag1	Mag1	Mag1	Mag2	Mag1	-	Mag1	Mag1	Mag1	Mag2	Mag1	Mag1	Mag1	-	Mag2	Mag2	Mag2	Mag1	-	Mag2	-	Mag1
AX-176817909	Araip.B08	26346362	-	-	-	-	-	-	-	-	-	-	-	-	-	-	-	-	-	-	-	-	-	-	-	-	-	-	-	-	-	-	-	-	-	-	-	-	-	-	-	-	-	-	-	-	-	-	-
AX-176801089	Araip.B08	28002434	-	-	-	-	-	-	-	-	-	-	-	-	-	-	-	-	-	-	-	-	-	-	-	-	-	-	-	-	-	-	-	-	-	-	-	-	-	-	-	-	-	-	-	-	-	-	-
AX-177641883	Araip.B08	28490879	Mag1	-	Mag2	Mag1	-	-	Mag2	Mag2	Mag1	Mag1	Mag1	-	Mag2	Mag1	Mag1	Mag1	Mag1	Mag1	Mag1	Mag2	Mag1	Mag1	Mag1	Mag1	Mag1	Mag1	Mag1	Mag1	Mag2	Mag1	-	Mag1	Mag1	Mag1	Mag2	Mag1	Mag1	Mag1	-	Mag2	Mag2	Mag2	Mag1	-	Mag2	-	Mag1
AX-176804099	Araip.B08	28852312	Mag1	-	Mag2	Mag1	-	-	Mag2	Mag1	Mag1	Mag1	Mag1	-	Mag2	Mag1	Mag1	Mag1	Mag1	Mag1	Mag1	Mag2	Mag1	Mag1	Mag1	Mag1	Mag1	Mag1	Mag1	Mag1	Mag2	Mag1	-	Mag1	Mag1	Mag1	Mag2	Mag1	Mag1	Mag1	-	Mag1	Mag2	Mag1	Mag1	-	Mag2	-	Mag1
AX-176793999	Araip.B08	29255254	Mag2	-	Mag2	-	-	-	Mag2	Mag2	-	-	-	-	Mag2	Mag2	Mag2	Mag2	Mag2	-	Mag1	Mag2	-	-	Mag1	Mag1	Mag1	-	-	-	Mag2	Mag2	-	-	-	-	Mag2	Mag2	-	Mag2	-	Mag2	Mag2	Mag2	-	-	Mag2	-	Mag1
AX-176805513	Araip.B08	29255307	Mag2	-	Mag2	Mag2	Mag1	-	Mag2	Mag2	Mag2	Mag2	Mag2	-	Mag2	Mag2	Mag2	Mag2	Mag2	Mag2	Mag2	Mag2	Mag2	Mag2	Mag2	Mag2	Mag2	Mag2	Mag2	Mag2	Mag2	Mag2	Mag1	Mag2	Mag2	Mag2	Mag2	Mag2	Mag2	Mag2	-	Mag2	Mag2	Mag2	Mag2	-	Mag2	-	Mag2
AX-176808255	Araip.B08	29255497	Mag2	-	Mag2	Mag2	-	-	Mag2	Mag2	Mag2	Mag2	Mag2	-	Mag2	Mag2	Mag2	Mag2	Mag2	Mag2	Mag2	Mag2	Mag2	Mag2	Mag2	Mag2	Mag2	Mag2	Mag2	Mag2	Mag2	Mag2	Mag1	Mag2	Mag2	Mag2	Mag2	Mag2	Mag2	Mag2	-	Mag2	Mag2	Mag2	Mag2	-	Mag2	-	Mag2
AX-176815701	Araip.B08	29255521	Mag2	-	Mag2	Mag2	Mag1	-	Mag2	Mag2	Mag2	Mag2	Mag2	-	Mag2	Mag2	Mag2	Mag2	Mag2	Mag2	Mag2	Mag2	Mag2	Mag2	Mag2	Mag2	Mag2	Mag2	Mag2	Mag2	Mag2	Mag2	Mag1	Mag2	Mag2	Mag2	Mag2	Mag2	Mag2	Mag2	-	Mag2	Mag2	Mag2	Mag2	-	Mag2	-	Mag2
AX-176814820	Araip.B08	30041320	Mag2	-	Mag2	Mag2	-	-	Mag2	Mag2	Mag1	Mag1	-	-	Mag2	Mag1	Mag2	Mag1	Mag1	-	Mag2	Mag2	Mag1	Mag1	-	-	Mag1	Mag1	Mag1	Mag1	Mag2	Mag1	-	Mag1	Mag1	Mag1	Mag2	Mag1	Mag1	Mag1	-	Mag2	Mag2	Mag2	Mag1	-	Mag2	-	Mag1
AX-177641506	Araip.B08	31741859	-	-	-	-	Mag1	-	-	-	-	-	Mag1	-	Mag1	-	Mag1	-	-	-	-	Mag1	-	-	-	Mag1	-	Mag1	-	-	-	Mag1	-	-	-	Mag1	-	-	-	-	-	-	Mag1	-	-	-	-	-	Mag1
AX-147228957	Araip.B08	33072693	Mag1	-	Mag1	Mag1	-	-	Mag1	Mag1	Mag1	Mag1	Mag1	-	Mag1	Mag1	Mag1	Mag1	-	Mag1	Mag1	Mag1	Mag1	Mag1	-	Mag1	Mag1	Mag1	Mag1	Mag1	Mag1	Mag1	-	Mag1	Mag1	Mag1	Mag1	Mag1	-	Mag1	-	Mag1	Mag1	Mag1	Mag1	-	Mag1	-	Mag1
AX-176805053	Araip.B08	36820073	Mag2	-	Mag2	Mag2	-	-	Mag2	Mag2	Mag2	Mag2	Mag2	-	Mag2	Mag2	Mag2	Mag2	Mag2	Mag2	Mag2	Mag2	Mag2	Mag2	Mag2	Mag2	Mag2	Mag2	Mag2	Mag2	Mag2	Mag2	-	Mag2	Mag2	Mag2	Mag2	Mag2	Mag2	Mag2	-	Mag2	Mag2	Mag2	Mag2	-	Mag2	-	Mag2
AX-147225568	Araip.B08	36820742	Mag2	-	-	Mag1	-	-	-	Mag2	Mag1	Mag1	Mag1	-	Mag2	Mag1	Mag1	-	-	Mag1	Mag1	-	Mag1	Mag1	Mag1	Mag1	Mag1	Mag1	Mag1	Mag1	-	Mag1	-	Mag1	Mag1	Mag1	Mag2	Mag1	Mag1	Mag1	-	Mag1	Mag2	Mag2	Mag1	-	-	-	Mag1
AX-147225570	Araip.B08	36820910	Mag2	-	Mag2	Mag2	-	-	Mag2	Mag2	Mag2	Mag2	Mag2	-	Mag2	Mag2	Mag2	Mag2	Mag2	Mag2	Mag2	Mag2	Mag2	Mag2	Mag2	Mag2	Mag2	Mag2	Mag2	Mag2	Mag2	Mag2	Mag1	Mag2	Mag2	Mag2	Mag2	Mag2	Mag2	Mag2	-	Mag2	Mag2	Mag2	Mag2	-	Mag2	-	Mag2
AX-176812838	Araip.B08	36821218	Mag2	-	Mag2	Mag1	-	-	Mag2	Mag2	Mag1	Mag1	Mag1	-	Mag2	Mag1	Mag1	Mag1	Mag1	Mag1	Mag1	Mag2	Mag1	Mag1	Mag1	Mag1	Mag1	Mag1	Mag1	Mag1	Mag2	Mag1	-	Mag1	Mag1	Mag1	Mag2	Mag1	Mag1	Mag1	-	Mag2	Mag2	Mag2	-	-	Mag2	-	Mag1
AX-176807585	Araip.B08	36823688	Mag2	-	Mag2	Mag1	-	-	Mag2	Mag2	Mag1	Mag1	Mag1	-	Mag2	Mag1	Mag1	Mag1	Mag1	Mag1	Mag1	Mag2	Mag1	Mag1	Mag1	Mag1	Mag1	Mag1	Mag1	Mag1	Mag2	Mag1	-	Mag1	Mag1	Mag1	Mag2	Mag1	Mag1	Mag1	-	Mag2	Mag2	Mag2	Mag1	-	Mag2	-	Mag1
AX-176802601	Araip.B08	36826493	Mag2	-	Mag2	Mag2	Mag1	-	Mag2	Mag2	Mag2	Mag2	Mag2	Mag1	Mag2	Mag2	Mag2	Mag2	Mag2	Mag2	Mag2	Mag2	Mag2	Mag2	Mag2	Mag2	Mag2	Mag2	Mag2	Mag2	Mag2	Mag2	Mag1	Mag2	Mag2	Mag2	Mag2	Mag2	Mag2	Mag2	-	Mag2	Mag2	Mag2	Mag2	-	Mag2	-	Mag2
AX-176793825	Araip.B08	36828604	Mag1	-	Mag1	Mag1	-	-	Mag1	Mag1	Mag1	Mag1	-	-	Mag1	Mag1	-	Mag1	Mag1	Mag1	Mag1	Mag1	Mag1	-	-	-	Mag1	Mag1	Mag1	Mag1	Mag1	Mag1	-	Mag1	Mag1	Mag1	Mag1	Mag1	Mag1	Mag1	-	Mag1	Mag1	Mag1	Mag1	-	Mag1	-	-
AX-176808178	Araip.B08	36833226	-	-	Mag2	-	-	-	Mag2	Mag2	Mag1	Mag1	Mag1	-	-	Mag1	Mag1	Mag1	Mag1	Mag1	Mag1	Mag2	Mag1	Mag1	Mag1	Mag1	Mag1	Mag1	Mag1	Mag1	Mag2	Mag1	-	Mag1	Mag1	Mag1	Mag2	Mag1	Mag1	-	-	Mag2	Mag2	Mag2	Mag1	-	Mag2	-	Mag1
AX-176796159	Araip.B08	36833230	Mag2	-	Mag2	Mag2	Mag1	-	Mag2	Mag2	Mag2	Mag2	Mag2	-	Mag2	Mag2	Mag2	Mag2	Mag2	Mag2	Mag2	Mag2	Mag2	Mag2	Mag2	Mag2	Mag2	Mag2	Mag2	Mag2	Mag2	Mag2	-	Mag2	Mag2	Mag2	Mag2	Mag2	Mag2	Mag2	-	Mag2	Mag2	Mag2	Mag2	-	Mag2	-	Mag2
AX-176792723	Araip.B08	36833243	Mag2	-	Mag2	Mag1	-	-	Mag2	Mag2	Mag1	Mag1	Mag1	-	Mag2	Mag1	Mag1	Mag1	Mag1	Mag1	Mag1	Mag2	Mag1	Mag1	Mag1	Mag1	Mag1	Mag1	Mag1	Mag1	Mag2	Mag1	-	Mag1	Mag1	Mag1	-	Mag1	Mag1	Mag1	-	Mag2	Mag2	Mag2	Mag1	-	Mag2	-	-
AX-147225598	Araip.B08	36838798	Mag2	-	Mag2	Mag2	-	-	Mag2	Mag2	Mag2	Mag2	Mag2	-	Mag2	Mag2	Mag2	Mag2	Mag2	Mag2	Mag2	Mag2	Mag2	Mag2	Mag2	Mag2	Mag2	Mag2	Mag2	Mag2	Mag2	Mag2	-	Mag2	Mag2	Mag2	Mag2	Mag2	Mag2	Mag2	-	Mag2	Mag2	Mag2	Mag2	-	Mag2	-	Mag2
AX-176803800	Araip.B08	36839131	-	-	Mag2	Mag1	-	-	Mag2	Mag2	-	Mag1	Mag1	-	Mag2	Mag1	Mag1	Mag1	Mag1	Mag1	Mag1	Mag2	Mag1	Mag1	Mag1	-	Mag1	Mag1	Mag1	Mag1	Mag2	Mag1	-	Mag1	Mag1	Mag1	-	-	Mag1	Mag1	-	Mag2	Mag2	Mag2	-	-	Mag2	-	Mag1
AX-176815070	Araip.B08	36839576	Mag2	-	Mag2	-	-	-	Mag2	Mag2	-	Mag1	Mag2	-	Mag2	Mag1	-	Mag1	Mag1	Mag1	Mag1	Mag2	Mag1	Mag1	Mag1	-	Mag1	Mag1	Mag1	Mag1	Mag2	Mag1	-	Mag1	Mag1	Mag1	Mag1	-	Mag1	Mag1	-	Mag2	Mag2	Mag2	Mag1	-	Mag2	-	-
AX-147258408	Araip.B08	73340378	Mag2	-	Mag1	Mag1	-	-	Mag2	Mag2	Mag1	Mag1	Mag1	-	Mag2	Mag1	Mag1	Mag1	Mag1	Mag1	Mag1	Mag2	Mag1	Mag1	Mag1	Mag1	Mag1	Mag1	Mag1	Mag1	Mag2	-	-	-	Mag1	Mag1	Mag2	Mag1	Mag1	Mag1	-	Mag2	Mag2	Mag2	Mag1	-	Mag2	-	Mag1
AX-147258422	Araip.B08	77662040	Mag2	-	Mag2	Mag1	-	-	Mag2	Mag2	Mag1	Mag1	Mag1	-	Mag2	Mag1	Mag1	Mag1	Mag1	Mag1	Mag1	Mag2	Mag1	Mag1	Mag1	Mag1	Mag1	Mag1	Mag1	Mag1	Mag2	-	-	-	Mag1	Mag1	Mag2	Mag1	Mag1	Mag1	-	Mag2	Mag2	Mag2	Mag1	-	Mag2	-	Mag1
AX-147258593	Araip.B08	101670375	Mag2	-	Mag2	Mag1	-	-	Mag2	Mag2	Mag1	Mag1	Mag1	-	Mag2	Mag1	Mag1	Mag1	Mag1	Mag1	Mag1	Mag2	Mag1	Mag1	Mag1	Mag1	Mag1	Mag1	Mag1	Mag1	Mag2	-	-	-	Mag1	Mag1	Mag2	Mag1	Mag1	Mag1	-	Mag2	Mag2	Mag2	Mag1	-	Mag2	-	Mag1
AX-147258622	Araip.B08	102977322	Mag2	-	Mag2	Mag2	-	-	Mag2	Mag2	Mag1	Mag2	Mag1	-	Mag2	Mag1	Mag1	Mag1	Mag1	Mag2	Mag1	Mag2	Mag1	Mag1	Mag1	Mag1	Mag1	Mag1	Mag1	Mag1	Mag2	-	-	-	Mag1	Mag1	Mag2	Mag2	Mag1	Mag1	-	-	Mag2	Mag2	Mag1	-	Mag1	-	Mag1
AX-147231175	Araip.B08	108072552	Mag2	-	Mag2	Mag1	-	-	Mag2	Mag2	Mag1	Mag1	Mag1	-	Mag2	Mag1	Mag1	Mag1	Mag1	Mag1	Mag1	Mag2	Mag1	Mag1	Mag1	Mag1	Mag1	Mag1	Mag1	Mag1	Mag2	-	-	-	Mag1	Mag1	Mag2	Mag1	Mag1	Mag1	-	Mag2	Mag2	Mag2	Mag1	-	Mag1	-	Mag1
AX-176819642	Araip.B08	108072552	Mag2	-	Mag2	Mag1	-	-	Mag2	Mag2	Mag1	Mag1	Mag1	-	Mag2	Mag1	Mag1	Mag1	Mag1	Mag1	Mag1	Mag2	Mag1	Mag1	Mag1	Mag1	Mag1	Mag1	Mag1	Mag1	Mag2	-	-	-	Mag1	Mag1	Mag2	Mag1	Mag1	Mag1	-	Mag2	Mag2	Mag2	Mag1	-	Mag1	-	Mag1
AX-177644132	Araip.B08	109905939	-	-	-	-	-	-	-	-	-	-	-	-	-	-	-	-	-	-	-	-	-	-	-	-	-	-	-	-	-	-	Mag1	-	-	-	-	-	-	-	-	-	-	-	-	-	-	-	-
AX-147231262	Araip.B08	112925307	-	-	Mag2	Mag1	-	-	Mag2	Mag2	Mag1	Mag1	Mag1	-	Mag2	Mag1	Mag1	Mag1	Mag1	Mag1	Mag1	Mag2	Mag1	Mag1	Mag1	Mag1	Mag1	Mag1	Mag1	Mag1	Mag2	-	-	-	Mag1	Mag1	Mag2	Mag1	Mag1	Mag1	-	Mag2	Mag2	Mag2	Mag1	-	Mag1	-	Mag1
AX-147258867	Araip.B08	113226569	Mag2	-	Mag2	Mag1	-	-	Mag2	-	Mag1	Mag1	Mag1	-	Mag2	Mag1	Mag1	Mag1	Mag1	Mag1	Mag1	Mag2	Mag1	Mag1	-	Mag1	Mag1	Mag1	Mag1	Mag1	Mag2	-	-	-	Mag1	Mag1	Mag1	Mag1	Mag1	Mag1	-	Mag2	Mag2	Mag2	Mag1	-	Mag1	-	Mag1
AX-147258872	Araip.B08	113312961	Mag2	-	Mag2	-	-	-	-	Mag2	Mag1	Mag1	Mag1	-	Mag2	Mag1	Mag1	Mag1	Mag1	-	Mag1	Mag2	Mag1	Mag1	-	Mag1	Mag1	Mag1	Mag1	Mag1	Mag2	-	-	-	Mag1	Mag1	Mag2	Mag1	Mag1	Mag1	-	Mag2	Mag2	Mag2	-	-	Mag1	-	Mag1
AX-147258881	Araip.B08	113601371	Mag2	-	Mag2	Mag1	-	-	-	Mag1	Mag1	-	Mag1	-	Mag2	Mag1	Mag1	Mag1	Mag1	Mag1	Mag1	Mag1	Mag1	Mag1	Mag1	Mag1	Mag1	Mag1	Mag1	Mag1	-	-	-	-	Mag1	Mag1	-	Mag1	Mag1	Mag1	-	Mag2	Mag2	Mag2	Mag1	Mag1	Mag1	-	Mag1
AX-147258883	Araip.B08	113633453	Mag2	-	Mag2	Mag1	-	-	Mag2	Mag2	Mag1	Mag1	Mag1	-	Mag2	Mag1	Mag1	Mag1	Mag1	Mag1	Mag1	Mag2	Mag1	Mag1	Mag1	Mag1	Mag1	Mag1	Mag1	Mag1	Mag2	-	-	-	Mag1	Mag1	Mag2	Mag1	Mag1	Mag1	-	Mag2	Mag2	Mag2	Mag1	Mag1	Mag1	-	Mag1
AX-147259027	Araip.B08	118293002	Mag2	-	Mag2	Mag1	-	-	Mag2	Mag2	Mag1	Mag1	Mag1	-	Mag2	-	Mag1	Mag1	Mag1	Mag1	Mag1	Mag2	Mag1	Mag1	Mag1	Mag1	Mag1	Mag1	Mag1	Mag1	Mag2	-	-	-	Mag1	Mag1	Mag1	Mag1	Mag1	Mag1	Mag1	Mag2	Mag1	Mag2	Mag1	Mag1	Mag1	-	Mag1
AX-147259053	Araip.B08	119368164	Mag2	-	Mag2	Mag1	-	-	Mag2	Mag2	Mag1	Mag1	Mag1	-	Mag2	Mag1	Mag1	Mag1	Mag1	Mag1	Mag1	Mag2	Mag1	Mag1	Mag1	Mag1	Mag1	Mag1	Mag1	Mag1	Mag2	-	-	-	Mag1	Mag1	Mag1	-	Mag1	Mag1	Mag1	Mag2	Mag2	Mag2	Mag1	Mag1	Mag1	-	Mag1
AX-147259163	Araip.B08	121556595	Mag2	-	Mag2	Mag1	-	-	Mag2	Mag2	Mag1	Mag1	Mag1	-	Mag2	Mag1	Mag1	Mag1	Mag1	Mag1	Mag2	Mag2	Mag1	Mag1	Mag1	Mag1	Mag2	Mag1	Mag2	Mag1	Mag2	-	-	-	Mag1	Mag1	Mag1	Mag1	Mag1	Mag1	Mag1	Mag2	Mag2	Mag2	Mag1	Mag1	Mag1	-	Mag1
AX-147259182	Araip.B08	122223999	Mag2	-	Mag2	Mag1	-	-	Mag2	Mag2	Mag1	Mag1	Mag1	-	Mag2	Mag1	Mag1	Mag1	Mag1	Mag1	Mag2	Mag2	Mag1	Mag1	Mag1	Mag1	Mag2	Mag1	Mag2	Mag1	Mag2	-	-	-	Mag1	Mag1	Mag1	Mag1	Mag1	Mag1	Mag1	Mag2	Mag2	Mag2	Mag1	Mag1	Mag1	-	Mag1
AX-147259195	Araip.B08	122363848	Mag2	-	Mag2	Mag1	-	-	Mag2	Mag2	Mag1	Mag1	Mag1	-	Mag2	Mag1	Mag1	Mag1	Mag1	Mag1	Mag2	Mag2	Mag1	Mag1	Mag1	Mag1	Mag2	Mag1	Mag2	Mag1	Mag2	-	-	-	Mag1	Mag1	Mag1	Mag1	Mag1	Mag1	Mag1	Mag2	Mag2	Mag2	Mag1	Mag1	Mag1	-	Mag1
AX-147259220	Araip.B08	122831418	Mag2	-	Mag2	Mag1	-	-	Mag2	Mag2	Mag1	Mag1	Mag1	-	Mag2	Mag1	Mag1	Mag1	Mag1	Mag1	Mag2	Mag2	Mag1	Mag1	Mag1	Mag1	Mag2	Mag1	Mag2	Mag1	Mag2	-	-	-	Mag1	Mag1	Mag1	Mag1	Mag1	Mag1	Mag1	Mag2	Mag2	Mag2	Mag1	Mag1	Mag1	-	Mag1
AX-147259221	Araip.B08	122897408	Mag2	-	Mag2	Mag1	-	-	Mag2	Mag2	Mag1	Mag1	Mag1	-	Mag2	Mag1	Mag1	Mag1	Mag1	Mag1	Mag2	Mag2	Mag1	Mag1	Mag1	Mag1	Mag2	Mag1	Mag2	Mag1	Mag2	-	-	-	Mag1	Mag1	Mag1	Mag1	Mag1	Mag1	Mag1	Mag2	Mag2	Mag2	Mag1	Mag1	Mag1	-	Mag1
AX-147259300	Araip.B08	124336392	Mag2	-	Mag2	Mag1	-	-	Mag2	Mag2	Mag1	-	Mag1	-	Mag2	Mag1	Mag1	Mag1	Mag1	Mag1	Mag2	Mag2	Mag1	Mag1	Mag1	Mag1	Mag2	Mag1	Mag2	Mag1	Mag2	-	-	-	Mag1	Mag1	Mag1	Mag1	Mag1	Mag1	Mag1	Mag2	Mag2	Mag2	Mag1	Mag1	Mag1	-	Mag1
AX-147259351	Araip.B08	125473859	Mag2	-	Mag1	Mag2	Mag1	-	Mag2	Mag2	Mag1	-	Mag1	-	Mag2	Mag1	Mag1	Mag1	Mag1	Mag1	Mag2	Mag2	Mag1	Mag1	Mag1	Mag2	Mag2	Mag2	Mag2	Mag1	Mag2	-	-	-	Mag1	Mag1	Mag1	Mag1	Mag1	Mag1	Mag1	Mag1	Mag2	Mag1	Mag1	Mag1	Mag1	-	Mag1
AX-176792136	Araip.B08	125956737	Mag1	-	Mag1	Mag2	-	-	Mag2	Mag2	Mag1	-	Mag1	-	Mag2	Mag1	Mag1	Mag1	Mag1	Mag1	Mag2	Mag2	Mag1	-	Mag1	Mag2	Mag2	Mag2	Mag2	Mag1	Mag2	-	-	-	Mag1	Mag1	Mag1	Mag1	Mag1	Mag1	Mag1	Mag1	Mag2	Mag1	Mag1	Mag1	Mag1	-	Mag1
AX-147259480	Araip.B08	128158193	Mag2	-	Mag1	Mag2	-	Mag1	Mag1	Mag2	Mag1	-	Mag1	-	Mag1	Mag1	-	Mag1	Mag1	Mag1	Mag2	Mag2	Mag1	-	Mag1	Mag2	Mag2	Mag2	Mag2	Mag1	Mag2	-	-	-	Mag1	Mag1	Mag1	Mag1	Mag1	Mag1	Mag1	Mag1	Mag1	Mag1	Mag2	Mag1	Mag1	Mag1	-
AX-147259486	Araip.B08	128211868	Mag2	-	Mag1	Mag2	-	Mag1	Mag1	Mag2	Mag1	-	Mag1	-	Mag1	Mag1	-	Mag1	Mag1	Mag1	Mag2	Mag2	Mag1	-	Mag1	Mag2	Mag2	Mag2	Mag2	Mag1	Mag2	-	-	-	Mag1	Mag1	Mag1	Mag1	Mag1	Mag1	Mag1	Mag1	Mag1	Mag1	Mag2	Mag1	Mag1	Mag1	Mag1
AX-147259496	Araip.B08	128323260	Mag2	-	Mag1	Mag2	-	Mag1	Mag1	Mag2	Mag1	-	Mag1	-	Mag1	Mag1	-	Mag1	Mag1	Mag1	Mag2	Mag1	Mag1	-	Mag1	Mag2	Mag2	Mag2	Mag2	Mag1	Mag2	-	-	-	Mag1	Mag1	Mag1	Mag1	-	Mag1	Mag1	Mag1	Mag1	Mag1	Mag2	Mag1	Mag1	Mag1	Mag1
AX-176792038	Araip.B08	128637022	Mag2	-	Mag1	Mag2	-	Mag1	Mag1	Mag2	Mag1	-	-	-	Mag1	Mag1	-	Mag1	Mag1	Mag1	Mag2	-	Mag1	-	Mag1	-	Mag2	-	Mag2	-	-	-	-	-	Mag1	-	Mag1	-	-	-	-	Mag1	Mag1	Mag1	Mag2	Mag1	Mag1	Mag1	Mag1
AX-147259523	Araip.B08	128894510	Mag2	-	Mag1	Mag2	-	Mag1	Mag1	Mag2	Mag1	-	Mag1	-	Mag1	Mag1	-	Mag1	Mag1	Mag1	Mag2	-	Mag1	-	Mag1	-	Mag2	-	Mag2	-	-	-	-	-	Mag1	-	Mag1	-	-	-	-	Mag1	Mag1	Mag1	Mag2	Mag1	Mag1	Mag1	Mag1
AX-147228772	Araip.B09	294225	Mag2	-	Mag1	-	-	-	Mag1	-	Mag2	-	Mag2	-	Mag2	-	-	-	Mag1	-	-	-	-	-	-	-	-	-	-	-	-	-	-	-	-	-	-	-	-	-	-	-	Mag2	-	Mag2	-	Mag1	-	Mag1
AX-147228780	Araip.B09	370636	Mag2	-	Mag1	-	-	-	Mag1	-	Mag2	-	Mag2	-	Mag2	-	-	-	Mag1	-	-	-	-	-	-	-	-	-	-	-	-	-	-	-	-	-	-	-	-	-	-	-	Mag2	-	Mag2	-	Mag1	-	Mag1
AX-147259610	Araip.B09	444888	Mag2	-	Mag1	-	-	-	Mag1	-	Mag2	-	Mag2	-	Mag2	-	-	-	Mag1	-	-	-	-	-	-	-	-	-	-	-	-	-	-	-	-	-	-	-	-	-	-	-	Mag2	-	Mag2	-	Mag1	-	Mag1
AX-147259657	Araip.B09	1032577	Mag2	-	Mag2	-	Mag2	Mag1	Mag1	-	Mag1	Mag2	Mag1	-	Mag1	Mag1	Mag1	Mag1	Mag1	-	-	Mag2	-	Mag2	-	-	-	-	-	Mag1	-	Mag2	-	Mag2	-	Mag1	-	Mag2	-	Mag1	Mag1	-	Mag1	-	Mag1	Mag1	-	Mag1	Mag1
AX-147259681	Araip.B09	1404687	Mag2	-	Mag2	-	-	Mag1	Mag1	-	Mag1	Mag2	Mag1	-	Mag1	Mag1	Mag1	Mag1	Mag1	Mag1	-	Mag1	-	Mag2	-	-	-	-	-	Mag1	-	Mag2	-	Mag1	-	Mag1	-	Mag2	-	Mag1	Mag2	-	Mag1	-	Mag1	Mag1	-	Mag1	Mag1
AX-147259684	Araip.B09	1418475	Mag2	-	Mag2	-	Mag2	Mag1	Mag1	-	Mag1	Mag2	Mag1	-	Mag1	Mag1	Mag1	Mag1	Mag1	-	-	Mag1	-	Mag2	-	-	-	-	-	Mag1	-	Mag2	-	Mag2	-	Mag1	-	Mag2	-	Mag1	Mag2	-	Mag1	-	Mag1	Mag1	-	Mag1	Mag1
AX-147259699	Araip.B09	1605429	Mag2	-	Mag2	-	Mag2	Mag1	Mag1	-	Mag1	Mag2	Mag1	-	Mag1	Mag1	Mag1	Mag1	Mag1	-	-	Mag1	-	Mag2	-	-	-	-	-	Mag1	-	Mag2	-	Mag2	-	Mag1	-	Mag2	-	Mag1	Mag2	-	Mag1	-	Mag1	Mag1	-	Mag1	Mag1
AX-147259703	Araip.B09	1619980	Mag2	-	Mag2	-	Mag2	Mag1	Mag1	-	Mag1	Mag2	Mag1	-	Mag1	Mag1	Mag1	Mag1	Mag1	-	-	Mag1	-	Mag2	-	-	-	-	-	Mag1	-	Mag2	-	Mag2	-	Mag1	-	Mag2	-	Mag1	Mag2	-	Mag1	-	Mag1	Mag1	-	Mag1	Mag1
AX-147259787	Araip.B09	2624818	Mag2	-	Mag2	-	Mag2	Mag1	Mag1	-	Mag1	Mag2	Mag1	-	Mag1	Mag1	Mag1	Mag1	Mag1	-	-	Mag1	-	Mag2	-	-	-	-	-	Mag1	-	Mag2	-	Mag2	-	Mag1	-	Mag2	-	Mag1	Mag2	-	Mag1	-	Mag1	Mag1	-	Mag1	Mag1
AX-147259791	Araip.B09	2719395	Mag2	-	Mag2	-	Mag2	Mag1	Mag1	-	Mag1	Mag2	Mag1	-	Mag1	Mag1	Mag1	Mag1	Mag1	-	-	Mag1	-	Mag2	-	-	-	-	-	Mag1	-	Mag2	-	Mag2	-	Mag1	-	Mag2	-	Mag1	Mag2	-	Mag1	-	Mag1	Mag1	-	Mag1	Mag1
AX-176791782	Araip.B09	2862787	Mag1	-	Mag2	-	Mag2	Mag1	Mag1	-	Mag1	Mag2	Mag1	-	Mag1	Mag1	Mag1	Mag1	Mag1	-	-	Mag1	-	Mag2	-	-	-	-	-	Mag1	-	Mag2	-	Mag2	-	Mag1	-	Mag2	-	Mag1	Mag2	-	Mag1	-	Mag1	Mag1	-	Mag1	Mag1
AX-147259838	Araip.B09	3508840	Mag2	-	Mag2	-	Mag2	Mag1	Mag1	-	Mag1	Mag2	Mag1	-	Mag1	Mag1	Mag1	Mag1	Mag1	-	-	Mag1	-	Mag2	-	-	-	-	-	Mag1	-	Mag2	-	Mag2	-	Mag1	-	Mag2	-	Mag1	Mag1	-	Mag1	-	Mag1	Mag1	-	Mag1	Mag1
AX-176791539	Araip.B09	3807796	-	-	Mag2	-	Mag2	Mag1	Mag1	-	Mag1	Mag2	Mag1	-	Mag1	Mag1	Mag1	Mag1	Mag1	-	-	Mag1	-	Mag2	-	-	-	-	-	Mag1	-	Mag2	-	Mag2	-	Mag1	-	Mag2	-	Mag1	Mag1	-	Mag1	-	Mag1	Mag1	-	Mag1	-
AX-147259886	Araip.B09	3956919	Mag2	-	Mag2	-	Mag2	Mag1	Mag1	-	Mag1	Mag2	Mag1	-	Mag1	Mag1	Mag1	Mag1	Mag1	-	-	Mag1	-	Mag2	-	-	-	-	-	Mag1	-	Mag2	-	Mag2	-	Mag1	-	Mag2	-	Mag1	Mag1	-	Mag1	-	Mag1	Mag1	-	Mag1	Mag1
AX-147259963	Araip.B09	5083710	Mag2	-	Mag2	-	Mag2	Mag1	Mag1	-	Mag1	Mag2	-	-	Mag1	Mag1	Mag1	Mag1	Mag1	-	-	Mag1	-	Mag2	-	-	-	-	-	Mag1	-	Mag2	-	Mag2	-	Mag1	-	Mag2	-	Mag1	Mag1	-	Mag1	-	Mag1	Mag1	-	Mag1	Mag1
AX-147260194	Araip.B09	10135479	Mag2	-	Mag2	-	Mag2	Mag1	Mag1	-	Mag1	Mag2	Mag1	-	Mag1	-	-	Mag1	Mag1	Mag2	-	Mag1	-	Mag1	-	-	-	-	-	Mag1	-	Mag2	-	Mag2	-	Mag1	-	Mag2	-	Mag1	Mag1	-	-	-	Mag1	Mag1	Mag1	-	Mag1
AX-147260211	Araip.B09	10376197	-	-	Mag2	-	Mag2	Mag1	Mag1	-	Mag1	Mag2	Mag1	-	Mag1	Mag1	Mag1	Mag1	Mag1	Mag1	-	Mag1	-	Mag1	-	-	-	-	-	Mag1	-	Mag2	-	Mag2	-	Mag1	-	Mag2	-	Mag1	Mag1	-	Mag1	-	Mag1	Mag1	Mag1	Mag1	Mag1
AX-147260230	Araip.B09	10719853	Mag2	-	Mag2	-	Mag2	Mag1	Mag1	Mag1	Mag1	Mag2	Mag1	-	Mag1	Mag1	Mag1	Mag1	Mag1	Mag1	-	Mag1	-	Mag1	-	-	-	-	-	Mag1	-	Mag2	-	Mag2	-	Mag1	-	Mag2	-	Mag1	Mag1	-	Mag1	-	Mag1	Mag1	Mag1	Mag1	Mag1
AX-147260234	Araip.B09	10801176	Mag1	-	Mag1	-	Mag1	-	-	-	-	Mag1	-	-	-	-	-	-	-	Mag1	-	-	-	-	-	-	-	-	-	-	-	Mag1	-	Mag1	-	-	-	Mag1	-	-	-	-	-	-	-	-	-	-	-
AX-176791960	Araip.B09	12385370	-	-	-	-	-	-	-	-	-	-	-	-	-	-	-	-	-	-	-	-	-	-	-	-	-	-	-	-	-	-	-	-	-	-	-	-	-	-	-	-	-	-	-	-	-	-	-
AX-147260445	Araip.B09	13954905	Mag2	-	-	-	-	Mag1	-	Mag1	-	Mag2	-	-	-	Mag1	-	Mag1	-	Mag1	-	Mag1	-	-	-	-	-	-	-	Mag1	-	Mag2	-	Mag2	-	Mag1	-	Mag2	-	Mag1	Mag1	-	-	-	-	Mag1	-	Mag1	-
AX-147260452	Araip.B09	13983443	Mag2	-	-	-	-	Mag1	-	Mag1	-	Mag2	-	-	-	Mag1	-	Mag1	-	Mag1	-	Mag1	-	-	-	-	-	-	-	Mag1	-	Mag2	-	Mag2	-	Mag1	-	Mag2	-	Mag1	Mag1	-	-	-	-	Mag1	-	Mag1	-
AX-147260453	Araip.B09	13984051	Mag2	-	-	-	-	Mag1	-	Mag1	-	Mag2	-	-	-	Mag1	-	Mag1	-	Mag1	-	Mag1	-	-	-	-	-	-	-	Mag1	-	Mag2	-	Mag2	-	Mag1	-	Mag2	-	Mag1	Mag1	-	-	-	-	Mag1	-	Mag1	-
AX-147260518	Araip.B09	15640616	Mag2	-	-	-	-	Mag1	-	Mag1	-	Mag2	-	-	-	Mag1	-	Mag1	-	Mag2	-	Mag1	-	-	-	-	-	-	-	-	-	Mag2	-	Mag2	-	Mag1	-	Mag2	-	Mag1	Mag1	-	-	-	-	Mag1	-	Mag1	-
AX-147260617	Araip.B09	18039421	Mag1	-	-	-	-	-	-	-	-	-	-	-	-	-	-	-	-	-	-	-	-	-	-	-	-	-	-	-	-	-	-	-	-	-	-	-	-	-	-	-	-	-	-	-	-	-	-
AX-177643092	Araip.B09	19855804	Mag1	-	-	-	-	Mag1	-	Mag1	-	Mag2	-	-	-	Mag1	-	Mag1	-	Mag2	-	Mag1	-	-	-	-	-	-	-	-	-	Mag2	-	Mag2	-	Mag1	-	Mag2	-	Mag1	Mag1	-	-	-	-	Mag1	-	Mag1	-
AX-177643504	Araip.B09	20598327	-	-	-	-	-	-	-	-	-	Mag1	-	-	-	-	-	-	-	Mag1	-	-	-	-	-	-	-	-	-	-	-	Mag1	-	Mag1	-	-	-	Mag1	-	-	-	-	-	-	-	-	-	-	-
AX-177640604	Araip.B09	22210750	-	-	-	-	-	Mag1	-	Mag1	-	Mag2	-	-	-	-	-	Mag1	Mag1	Mag1	-	Mag1	-	-	-	Mag1	-	-	-	-	-	Mag2	-	Mag2	-	-	-	-	-	Mag1	Mag1	-	-	-	-	Mag1	-	Mag1	-
AX-176823772	Araip.B09	24412728	Mag1	-	-	-	-	-	-	-	-	-	-	-	-	-	-	-	-	-	-	-	-	-	-	-	-	-	-	-	-	-	-	-	-	-	-	-	-	-	-	-	-	-	-	-	-	-	-
AX-176792156	Araip.B09	24898740	Mag2	-	-	-	-	Mag1	-	Mag1	-	Mag2	-	-	-	Mag1	-	Mag1	-	-	-	Mag1	-	-	-	Mag1	-	Mag1	-	-	-	Mag2	-	Mag2	-	Mag1	-	Mag2	-	Mag1	Mag1	-	-	-	-	Mag1	-	Mag1	-
AX-147260811	Araip.B09	26142110	Mag1	-	-	-	-	Mag1	-	Mag1	-	Mag2	-	-	-	Mag1	-	Mag1	-	Mag2	-	Mag1	-	-	-	Mag1	-	Mag1	-	-	-	Mag2	-	Mag2	-	Mag1	-	Mag2	-	Mag1	Mag1	-	-	-	-	Mag1	-	Mag1	-
AX-147260846	Araip.B09	27563919	Mag2	-	-	-	-	Mag1	-	Mag1	-	Mag2	-	Mag1	-	Mag1	-	Mag1	-	Mag2	-	Mag1	-	-	-	Mag1	-	Mag1	-	-	-	Mag2	-	Mag2	-	Mag1	-	Mag2	-	Mag1	Mag1	-	-	-	-	Mag1	-	Mag1	-
AX-147260872	Araip.B09	29510686	Mag2	-	-	-	-	Mag1	-	Mag1	-	Mag2	-	Mag1	-	Mag1	-	Mag1	-	-	-	Mag1	-	-	-	Mag1	-	Mag1	-	-	-	Mag2	-	Mag2	-	Mag1	-	Mag2	-	Mag1	Mag1	-	-	-	-	Mag1	-	Mag1	-
AX-147260916	Araip.B09	32634012	Mag2	-	-	-	-	Mag1	-	Mag1	-	Mag2	-	Mag1	-	Mag1	-	Mag1	-	-	-	Mag1	-	-	-	Mag1	-	Mag1	-	-	-	Mag2	-	Mag1	-	Mag1	-	Mag2	-	Mag1	Mag1	-	-	-	-	Mag1	-	Mag1	-
AX-147260926	Araip.B09	33805614	Mag2	-	-	-	-	Mag1	-	Mag2	-	Mag2	-	Mag1	-	Mag1	-	Mag1	-	-	-	Mag1	-	-	-	Mag1	-	Mag1	-	-	-	Mag2	-	Mag2	-	Mag1	-	Mag2	-	Mag1	Mag1	-	-	-	-	Mag1	-	Mag1	-
AX-147260956	Araip.B09	36640447	Mag1	-	-	-	-	Mag1	-	Mag1	-	Mag1	-	Mag1	-	Mag1	-	Mag1	-	Mag1	-	Mag1	-	-	-	Mag1	-	Mag1	-	-	-	Mag1	-	Mag1	-	Mag1	-	Mag1	-	Mag1	Mag1	-	-	-	-	Mag1	-	Mag1	-
AX-176804223	Araip.B09	41788230	-	-	-	-	-	-	-	-	-	-	-	-	-	-	-	-	-	-	-	-	-	-	-	-	-	-	-	-	-	-	-	-	-	-	-	-	-	-	-	-	-	-	-	-	-	-	-
AX-147261029	Araip.B09	42956353	Mag2	-	-	-	-	Mag1	-	Mag1	-	Mag2	-	Mag1	-	Mag1	-	Mag1	-	Mag2	-	Mag1	-	-	-	Mag1	-	Mag1	-	-	-	Mag2	-	Mag2	-	Mag1	-	Mag2	-	Mag1	Mag1	-	-	-	-	Mag1	-	Mag1	-
AX-176821917	Araip.B09	42966625	Mag1	-	-	-	-	-	-	-	-	-	-	-	-	-	-	-	-	-	-	-	-	-	-	-	-	-	-	-	-	-	-	-	-	-	-	-	-	-	-	-	-	-	-	-	-	-	-
AX-147261091	Araip.B09	50015557	Mag2	-	-	-	-	Mag1	-	Mag1	-	Mag2	-	Mag1	-	Mag1	-	Mag1	-	Mag2	-	Mag1	-	-	-	Mag1	-	Mag1	-	-	-	Mag2	-	Mag2	-	Mag1	-	Mag2	-	Mag1	Mag1	-	-	-	-	Mag1	-	Mag1	-
AX-176811401	Araip.B09	50024895	Mag2	-	-	-	-	Mag1	-	Mag1	-	Mag2	-	Mag1	-	Mag1	-	Mag1	-	Mag2	-	Mag1	-	-	-	Mag1	-	Mag1	-	-	-	Mag2	-	Mag2	-	Mag1	-	Mag2	-	Mag1	Mag1	-	-	-	-	Mag1	-	Mag1	-
AX-176812165	Araip.B09	50027352	Mag2	-	-	-	-	Mag1	-	Mag1	-	Mag2	-	Mag1	-	Mag1	-	Mag1	-	Mag2	-	Mag1	-	-	-	Mag1	-	Mag1	-	-	-	Mag2	-	Mag2	-	Mag1	-	Mag2	-	Mag1	Mag1	-	-	-	-	Mag1	-	Mag1	-
AX-176796601	Araip.B09	50051330	Mag2	-	-	-	-	Mag1	-	Mag1	-	-	-	-	-	Mag1	-	Mag1	-	Mag1	-	Mag1	-	-	-	Mag1	-	Mag1	-	-	-	Mag1	-	-	-	Mag1	-	Mag1	-	Mag1	Mag1	-	-	-	-	Mag1	-	Mag1	-
AX-176801542	Araip.B09	50055719	Mag2	-	-	-	-	Mag1	-	Mag1	-	Mag2	-	Mag1	-	Mag1	-	Mag1	-	Mag1	-	Mag1	-	-	-	-	-	Mag1	-	-	-	Mag2	-	-	-	Mag1	-	Mag2	-	Mag1	Mag1	-	-	-	-	-	-	Mag1	-
AX-147233346	Araip.B09	50058047	-	-	-	-	-	Mag1	-	-	-	Mag2	-	Mag1	-	Mag1	-	-	-	Mag2	-	Mag1	-	-	-	Mag1	-	Mag1	-	-	-	Mag2	-	Mag2	-	Mag1	-	Mag2	-	Mag1	Mag1	-	-	-	-	Mag1	-	Mag1	-
AX-147261211	Araip.B09	79642894	Mag2	-	-	-	-	Mag1	-	Mag1	-	Mag2	-	Mag1	-	-	-	Mag1	-	-	-	Mag1	-	-	-	Mag1	-	Mag1	-	-	-	Mag2	-	Mag2	-	-	-	Mag2	-	-	Mag1	-	-	-	-	Mag1	-	Mag1	-
AX-147261253	Araip.B09	89388921	-	-	-	-	-	Mag1	-	Mag1	-	Mag2	-	Mag1	-	Mag1	-	Mag1	-	Mag2	-	Mag1	-	-	-	Mag1	-	Mag1	-	-	-	Mag2	-	Mag2	-	Mag1	-	Mag2	-	Mag1	Mag1	-	-	-	-	Mag1	-	Mag1	-
AX-176810869	Araip.B09	97172470	Mag2	-	-	-	-	Mag1	-	Mag1	-	Mag2	-	Mag1	-	Mag1	-	Mag1	-	Mag2	-	Mag1	-	-	-	Mag1	-	Mag1	-	-	-	Mag2	-	Mag2	-	Mag1	-	Mag2	-	Mag1	Mag1	-	-	-	-	Mag1	-	Mag1	-
AX-176796853	Araip.B09	97613023	Mag1	-	-	-	-	Mag1	-	Mag1	-	Mag1	-	Mag1	-	Mag1	-	Mag1	-	Mag1	-	Mag1	-	-	-	Mag1	-	Mag1	-	-	-	Mag1	-	Mag1	-	Mag1	-	Mag1	-	Mag1	Mag1	-	-	-	-	Mag1	-	Mag1	-
AX-177640519	Araip.B09	112048366	Mag1	-	-	-	-	-	-	-	-	-	-	-	-	-	-	-	-	-	-	-	-	-	-	-	-	-	-	-	-	-	-	-	-	-	-	-	-	-	-	-	-	-	-	-	-	-	-
AX-176802033	Araip.B09	112356545	-	-	-	-	-	-	-	-	-	-	-	-	-	-	-	-	-	-	-	-	-	-	Mag1	-	-	-	-	-	-	-	-	-	-	-	-	-	-	-	-	-	-	-	-	-	-	-	-
AX-176801597	Araip.B09	114206705	Mag1	-	-	-	-	-	-	-	-	Mag1	-	Mag1	-	Mag1	-	Mag1	-	Mag1	-	-	-	-	-	-	-	-	-	-	-	-	-	-	-	-	-	-	-	-	-	-	-	-	-	-	-	Mag1	-
AX-147261634	Araip.B09	125220602	Mag2	-	-	-	-	Mag1	-	Mag1	-	Mag2	-	Mag1	-	Mag1	-	Mag1	-	-	-	-	-	-	-	-	-	-	-	-	-	-	-	-	-	-	-	-	-	-	-	-	-	-	-	Mag1	-	Mag1	-
AX-177637637	Araip.B09	126996989	Mag2	-	-	-	-	Mag1	-	Mag1	-	Mag2	-	Mag1	-	Mag1	-	Mag1	-	-	-	-	-	-	-	-	-	-	-	-	-	-	-	-	-	-	-	-	-	-	-	-	-	-	-	Mag1	-	Mag1	-
AX-147261694	Araip.B09	128347424	Mag2	-	-	-	-	Mag1	-	Mag1	-	Mag2	-	Mag1	-	Mag1	-	Mag1	-	Mag2	-	-	-	-	-	-	-	-	-	-	-	-	-	-	-	-	-	-	-	-	-	-	-	-	-	Mag1	-	Mag1	-
AX-177637290	Araip.B09	129848706	-	-	-	-	-	-	-	-	-	Mag1	-	-	-	-	-	-	-	Mag1	-	-	-	-	-	-	-	-	-	-	-	-	-	-	-	-	-	-	-	-	-	-	-	-	-	-	-	-	-
AX-147261853	Araip.B09	135376574	Mag1	-	-	-	-	Mag1	-	Mag1	-	Mag2	-	Mag1	-	Mag1	-	Mag1	-	Mag1	-	-	-	-	-	-	-	-	-	-	-	-	-	-	-	-	-	-	-	-	-	-	-	-	-	Mag1	-	Mag1	-
AX-176808207	Araip.B09	137716024	-	-	-	-	-	-	-	-	-	-	-	-	-	-	-	-	-	-	Mag1	-	-	-	-	-	Mag1	-	Mag1	-	Mag1	-	Mag1	-	Mag1	-	Mag1	-	Mag1	-	-	-	-	-	-	-	-	-	-
AX-147261962	Araip.B09	137987524	Mag1	-	-	-	-	-	-	-	-	-	-	-	-	-	-	-	-	-	-	-	-	-	-	-	-	-	-	-	-	-	-	-	-	-	-	-	-	-	-	-	-	-	-	-	-	-	-
AX-147261968	Araip.B09	138035545	Mag2	-	-	-	-	Mag1	-	Mag1	-	Mag2	-	Mag1	-	Mag1	-	Mag1	-	Mag2	-	-	-	-	-	-	-	-	-	-	-	-	-	-	-	-	-	-	-	-	-	-	-	-	-	Mag1	-	Mag2	-
AX-147262017	Araip.B09	138989973	-	-	-	-	-	-	-	-	-	-	-	-	-	-	-	-	-	-	Mag1	-	-	-	-	-	Mag1	-	Mag1	-	Mag1	-	Mag1	-	Mag1	-	Mag1	-	Mag1	-	-	-	-	-	-	-	-	-	-
AX-147262029	Araip.B09	139579365	Mag1	-	-	-	-	-	-	-	-	-	-	-	-	-	-	-	-	-	-	-	-	-	-	-	-	-	-	-	-	-	-	-	-	-	-	-	-	-	-	-	-	-	-	-	-	-	-
AX-176792005	Araip.B09	140542408	Mag2	-	-	-	-	-	-	-	-	-	-	-	-	-	-	-	-	-	-	-	-	-	-	-	-	-	-	-	-	-	-	-	-	-	-	-	-	-	-	-	-	-	-	-	-	-	-
AX-147262139	Araip.B09	140933231	Mag2	-	-	-	-	-	-	-	-	-	-	-	-	-	-	-	-	-	-	-	-	-	-	-	-	-	-	-	-	-	-	-	-	-	-	-	-	-	-	-	-	-	-	-	-	-	-
AX-177644226	Araip.B09	141745302	Mag1	-	-	-	-	-	-	-	-	-	-	-	-	-	-	-	-	-	-	-	-	-	-	-	-	-	-	-	-	-	-	-	-	-	-	-	-	-	-	-	-	-	-	-	-	-	-
AX-147262211	Araip.B09	141943686	Mag2	-	-	-	-	-	-	-	-	-	-	-	-	-	-	-	-	-	-	-	-	-	-	-	-	-	-	-	-	-	-	-	-	-	-	-	-	-	-	-	-	-	-	-	-	-	-
AX-147262258	Araip.B09	142396010	Mag1	-	-	-	-	-	-	-	-	-	-	-	-	-	-	-	-	-	-	-	-	-	-	-	-	-	-	-	-	-	-	-	-	-	-	-	-	-	-	-	-	-	-	-	-	-	-
AX-147262298	Araip.B09	142793014	Mag1	-	-	-	-	-	-	-	-	-	-	-	-	-	-	-	-	-	-	-	-	-	-	-	-	-	-	-	-	-	-	-	-	-	-	-	-	-	-	-	-	-	-	-	-	-	-
AX-147262299	Araip.B09	142796440	Mag2	-	-	-	-	-	-	-	-	-	-	-	-	-	-	-	-	-	-	-	-	-	-	-	-	-	-	-	-	-	-	-	-	-	-	-	-	-	-	-	-	-	-	-	-	-	-
AX-147234367	Araip.B09	143198232	Mag1	-	-	-	-	-	-	-	-	-	-	-	-	-	-	-	-	-	-	-	-	-	-	-	-	-	-	-	-	-	-	-	-	-	-	-	-	-	-	-	-	-	-	-	-	-	-
AX-147262346	Araip.B09	143618134	Mag1	-	-	-	-	-	-	-	-	-	-	-	-	-	-	-	-	-	-	-	-	-	-	-	-	-	-	-	-	-	-	-	-	-	-	-	-	-	-	-	-	-	-	-	-	-	-
AX-147262370	Araip.B09	143736488	Mag1	-	-	-	-	-	-	-	-	-	-	-	-	-	-	-	-	-	-	-	-	-	-	-	-	-	-	-	-	-	-	-	-	-	-	-	-	-	-	-	-	-	-	-	-	-	-
AX-147262420	Araip.B09	144156174	Mag1	-	-	-	-	-	-	-	-	-	-	-	-	-	-	-	-	-	-	-	-	-	-	-	-	-	-	-	-	-	-	-	-	-	-	-	-	-	-	-	-	-	-	-	-	-	-
AX-176791780	Araip.B09	144672719	Mag1	-	-	-	-	-	-	-	-	-	-	-	-	-	-	-	-	-	-	-	-	-	-	-	-	-	-	-	-	-	-	-	-	-	-	-	-	-	-	-	-	-	-	-	-	-	-
AX-147262510	Araip.B09	144847481	Mag1	-	-	-	-	-	-	-	-	-	-	-	-	-	-	-	-	-	-	-	-	-	-	-	-	-	-	-	-	-	-	-	-	-	-	-	-	-	-	-	-	-	-	-	-	-	-
AX-147262533	Araip.B09	145020724	Mag1	-	-	-	-	-	-	-	-	-	-	-	-	-	-	-	-	-	-	-	-	-	-	-	-	-	-	-	-	-	-	-	-	-	-	-	-	-	-	-	-	-	-	-	-	-	-
AX-147262619	Araip.B09	145983751	Mag1	-	-	-	-	-	-	-	-	-	-	-	-	-	-	-	-	-	-	-	-	-	-	-	-	-	-	-	-	-	-	-	-	-	-	-	-	-	-	-	-	-	-	-	-	-	-
AX-176791729	Araip.B09	146048426	Mag1	-	-	-	-	-	-	-	-	-	-	-	-	-	-	-	-	-	-	-	-	-	-	-	-	-	-	-	-	-	-	-	-	-	-	-	-	-	-	-	-	-	-	-	-	-	-
AX-177638435	Araip.B09	146828839	Mag1	-	-	-	-	-	-	-	-	-	-	-	-	-	-	-	-	-	-	-	-	-	-	-	-	-	-	-	-	-	-	-	-	-	-	-	-	-	-	-	-	-	-	-	-	-	-
AX-147262729	Araip.B09	146856324	Mag1	-	-	-	-	-	-	-	-	-	-	-	-	-	-	-	-	-	-	-	-	-	-	-	-	-	-	-	-	-	-	-	-	-	-	-	-	-	-	-	-	-	-	-	-	-	-
AX-147262737	Araip.B09	146913649	Mag1	-	-	-	-	-	-	-	-	-	-	-	-	-	-	-	-	-	-	-	-	-	-	-	-	-	-	-	-	-	-	-	-	-	-	-	-	-	-	-	-	-	-	-	-	-	-
AX-147262789	Araip.B10	309636	-	-	-	-	-	-	-	-	-	-	-	-	-	-	-	-	-	-	-	-	-	-	-	-	-	-	-	-	-	-	-	-	-	-	-	-	-	-	-	-	-	-	-	-	-	-	-
AX-147209362	Araip.B10	484822	Mag2	-	-	-	-	-	-	-	-	-	-	-	-	-	-	-	-	-	-	Mag2	-	Mag1	-	Mag2	-	Mag2	-	Mag1	-	Mag1	-	Mag1	-	-	-	Mag2	-	Mag1	-	-	-	-	-	-	-	-	-
AX-147262827	Araip.B10	757821	Mag2	-	-	-	-	-	-	-	-	-	-	-	-	-	-	-	-	-	-	Mag2	-	Mag1	Mag1	Mag1	-	Mag1	-	Mag1	-	-	-	Mag1	-	-	-	Mag2	-	Mag1	-	-	-	-	-	-	-	-	-
AX-147262885	Araip.B10	1286339	Mag2	-	-	-	-	-	-	-	-	-	-	-	-	-	-	-	-	-	-	Mag2	-	Mag1	-	Mag1	-	Mag1	-	Mag1	-	Mag1	-	Mag1	-	-	-	Mag2	-	Mag1	-	-	-	-	-	-	-	-	-
AX-147262896	Araip.B10	1452808	Mag2	-	-	-	-	-	-	-	-	-	-	-	-	-	-	-	-	-	-	Mag2	-	Mag1	-	Mag1	-	Mag1	-	Mag1	-	Mag1	-	Mag1	-	-	-	Mag1	-	-	-	-	-	-	-	-	-	-	-
AX-147262944	Araip.B10	1916443	Mag2	-	-	-	-	-	-	-	-	-	-	-	-	-	-	-	-	-	-	-	-	-	-	-	-	-	-	-	-	-	-	-	-	-	-	-	-	-	-	-	-	-	-	-	-	-	Mag1
AX-147234894	Araip.B10	2047199	Mag2	-	-	-	-	-	-	-	-	-	-	-	-	-	-	-	-	-	-	-	-	-	-	-	-	-	-	-	-	-	-	-	-	-	-	-	-	-	-	-	-	-	-	-	-	-	-
AX-176791790	Araip.B10	2284240	Mag2	-	-	-	-	-	-	-	-	-	-	-	-	-	-	-	-	-	-	-	-	-	-	-	-	-	-	-	-	-	-	-	-	-	-	-	-	-	-	-	-	-	-	-	-	-	-
AX-176791992	Araip.B10	3020920	Mag2	-	-	-	-	-	-	-	-	-	-	-	-	-	-	-	-	-	-	-	-	-	-	-	-	-	-	-	-	-	-	-	-	-	-	-	-	-	-	-	-	-	-	-	-	-	-
AX-147263086	Araip.B10	3699190	Mag2	-	-	-	-	-	-	-	-	-	-	-	-	-	-	-	-	-	-	-	-	-	-	-	-	-	-	-	-	-	-	-	-	-	-	-	-	-	-	-	-	-	-	-	-	-	-
AX-147263108	Araip.B10	3837269	Mag2	-	-	-	-	-	-	-	-	-	-	-	-	-	-	-	-	-	-	-	-	-	-	-	-	-	-	-	-	-	-	-	-	-	-	-	-	-	-	-	-	-	-	-	-	-	-
AX-147263112	Araip.B10	3847206	Mag2	-	-	-	-	-	-	-	-	-	-	-	-	-	-	-	-	-	-	-	-	-	-	-	-	-	-	-	-	-	-	-	-	-	-	-	-	-	-	-	-	-	-	-	-	-	-
AX-147263125	Araip.B10	4025926	-	-	-	-	-	-	-	-	-	-	-	-	-	-	-	-	-	-	-	-	-	-	-	-	-	-	-	-	-	-	-	-	-	-	-	-	-	-	-	-	-	-	-	-	-	-	-
AX-147263173	Araip.B10	4582823	Mag2	-	-	-	-	-	-	-	-	-	-	-	-	-	-	-	-	-	-	-	-	-	-	-	-	-	-	-	-	-	-	-	-	-	-	-	-	-	-	-	-	-	-	-	-	-	Mag1
AX-176809160	Araip.B10	4583984	Mag1	-	-	-	-	-	-	-	-	-	-	-	-	-	-	-	-	-	-	-	-	-	-	-	-	-	-	-	-	-	-	-	-	-	-	-	-	-	-	-	-	-	-	-	-	-	Mag1
AX-147263202	Araip.B10	5147691	-	-	-	-	-	-	-	-	-	-	-	-	-	-	-	-	-	-	-	-	-	-	-	-	-	-	-	-	-	-	-	-	-	-	-	-	-	-	-	-	-	-	-	-	-	-	Mag1
AX-147263217	Araip.B10	5531448	Mag2	-	-	-	-	-	-	-	-	-	-	-	-	-	-	-	-	-	-	-	-	-	-	-	-	-	-	-	-	-	-	-	-	-	-	-	-	-	-	-	-	-	-	-	-	-	Mag1
AX-147211999	Araip.B10	8317223	Mag1	-	-	-	-	-	-	-	-	-	-	-	-	-	-	-	-	-	-	-	-	-	-	-	-	-	-	-	-	-	-	-	-	-	-	-	-	-	-	-	-	-	-	-	-	-	Mag1
AX-147263331	Araip.B10	9190742	Mag2	-	-	-	-	-	-	-	-	-	-	-	-	-	-	-	-	-	-	-	-	-	-	-	-	-	-	-	-	-	-	-	-	-	-	-	-	-	-	-	-	-	-	-	-	-	Mag1
AX-176791703	Araip.B10	9968629	Mag2	-	-	-	-	-	-	-	-	-	-	-	-	-	-	-	-	-	-	-	-	-	-	-	-	-	-	-	-	-	-	-	-	-	-	-	-	-	-	-	-	-	-	-	-	-	Mag1
AX-147263446	Araip.B10	10717070	Mag2	-	-	-	-	-	-	-	-	-	-	-	-	-	-	-	-	Mag1	-	-	-	-	-	-	-	-	-	-	-	-	-	-	-	-	-	-	-	-	-	-	-	-	-	-	-	-	Mag1
AX-147263491	Araip.B10	11214359	Mag2	-	-	-	-	-	-	-	-	-	-	-	-	-	-	-	-	-	-	-	-	-	-	-	-	-	-	-	-	-	-	-	-	-	-	-	-	-	-	-	-	-	-	-	-	-	Mag1
AX-177639192	Araip.B10	11960833	-	-	-	-	-	-	-	-	-	-	-	-	-	-	-	-	-	-	-	-	-	-	Mag1	-	-	-	-	-	-	-	-	-	-	-	-	-	-	-	-	-	-	-	-	-	-	-	Mag1
AX-177644269	Araip.B10	13247245	Mag1	-	-	-	-	-	-	-	-	-	-	-	-	-	-	-	-	-	-	-	-	-	-	-	-	-	-	-	-	-	-	-	-	-	-	-	-	-	-	-	-	-	-	-	-	-	Mag1
AX-176791776	Araip.B10	14052510	Mag2	-	-	-	-	-	-	-	-	-	-	-	-	-	-	-	-	-	-	-	-	-	Mag1	-	-	-	-	-	-	-	-	-	-	-	-	-	-	-	-	-	-	-	-	-	-	-	Mag1
AX-177642573	Araip.B10	14149454	Mag1	-	-	-	-	-	-	-	-	-	-	-	-	-	-	-	-	-	-	-	-	-	-	-	-	-	-	-	-	-	-	-	-	-	Mag1	-	-	-	-	-	-	-	-	-	-	-	-
AX-147263607	Araip.B10	15189329	Mag1	-	-	-	-	-	-	-	-	-	-	-	-	-	-	-	-	-	-	-	-	-	-	-	-	-	-	-	-	-	-	-	-	-	-	-	-	-	-	-	-	-	-	-	-	-	Mag1
AX-176820657	Araip.B10	17061918	Mag1	-	-	-	-	-	-	-	-	-	-	-	-	-	-	-	-	-	-	-	-	-	-	-	-	-	-	-	-	-	-	-	-	-	-	-	-	-	-	-	-	-	-	-	-	-	-
AX-177639228	Araip.B10	19663894	Mag2	-	-	-	-	-	-	-	-	-	-	-	-	-	-	-	-	-	-	-	-	-	-	-	-	-	-	-	-	-	-	-	-	-	-	-	-	-	-	-	-	-	-	-	-	-	Mag1
AX-147263769	Araip.B10	22491904	Mag2	-	-	-	-	-	-	-	-	-	-	-	-	-	-	-	-	-	-	-	-	-	-	-	-	-	-	-	-	-	-	-	-	-	-	-	-	-	-	-	-	-	-	-	-	-	Mag1
AX-176799200	Araip.B10	23494035	Mag1	-	-	-	-	-	-	-	-	-	-	-	-	-	-	-	-	-	-	-	-	-	-	-	-	-	-	-	-	-	-	-	-	-	-	-	-	-	-	-	-	-	-	-	-	-	-
AX-176792092	Araip.B10	25381175	Mag2	-	-	-	-	-	-	-	-	-	-	-	-	-	-	-	-	-	Mag1	-	-	-	-	-	-	-	-	-	-	-	-	-	-	-	-	-	-	-	-	-	-	-	-	-	-	-	Mag1
AX-147263844	Araip.B10	27366049	Mag2	-	-	-	-	-	-	-	-	-	-	-	-	-	-	-	-	-	-	-	-	-	-	-	-	-	-	-	-	-	-	-	-	-	-	-	-	-	-	-	-	-	-	-	-	-	Mag1
AX-147264063	Araip.B10	60634383	-	-	-	-	-	-	-	-	-	-	-	-	-	-	-	-	-	-	-	-	-	-	-	-	-	-	-	-	-	-	-	-	-	-	-	-	-	-	-	-	-	-	-	-	-	-	-
AX-147264064	Araip.B10	60634925	Mag1	-	-	-	-	-	-	-	-	-	-	-	-	-	-	-	-	-	-	-	-	-	-	-	-	-	-	-	-	-	-	-	-	-	-	-	-	-	-	-	-	-	-	-	-	-	-
AX-176810036	Araip.B10	96793488	Mag2	-	-	-	-	-	-	-	-	-	-	-	-	-	-	-	-	-	-	-	-	-	-	-	-	-	-	-	-	-	-	-	-	-	-	-	Mag1	-	-	-	-	-	-	-	-	-	-
AX-147264208	Araip.B10	101217593	Mag2	-	-	-	-	-	-	-	-	-	-	-	-	-	-	-	-	-	-	-	-	-	-	-	-	-	-	-	-	-	-	-	-	-	-	-	-	-	-	-	-	-	-	-	-	-	Mag1
AX-177637244	Araip.B10	102847093	-	-	-	-	-	-	-	-	-	-	-	-	-	-	-	-	-	-	-	-	-	-	-	-	-	-	-	-	-	-	-	-	-	-	-	-	-	-	-	-	-	-	-	-	-	-	Mag1
AX-147264223	Araip.B10	102975592	-	-	-	-	-	-	-	-	-	-	-	-	-	-	-	-	-	-	-	-	-	-	-	-	-	-	-	-	-	-	-	-	-	-	-	-	-	-	-	-	-	-	-	-	-	-	-
AX-177638757	Araip.B10	106292220	Mag2	-	-	-	-	-	-	-	-	-	-	-	-	-	-	-	-	-	-	-	-	-	-	-	-	-	-	-	-	-	-	-	-	-	-	-	-	-	-	-	-	-	-	-	-	-	Mag1
AX-147264328	Araip.B10	111150033	Mag2	-	-	-	-	-	-	-	-	-	-	-	-	-	-	-	-	-	-	-	-	-	-	-	-	-	-	-	-	-	-	-	-	-	-	-	-	-	-	-	-	-	-	-	-	-	Mag1
AX-147264395	Araip.B10	113584807	-	-	-	-	-	-	-	-	-	-	-	-	-	-	-	-	-	-	-	-	-	-	-	-	-	-	-	-	-	-	-	-	-	-	-	-	-	-	-	-	-	-	-	-	-	-	Mag1
AX-147264423	Araip.B10	115758393	-	-	-	-	-	-	-	-	-	-	-	-	-	-	-	-	-	-	-	-	-	-	-	-	-	-	-	-	-	-	-	-	-	-	-	-	-	-	-	-	-	-	-	-	-	-	-
AX-147264424	Araip.B10	115759337	-	-	-	-	-	-	-	-	-	-	-	-	-	-	-	-	-	-	-	-	-	-	-	-	-	-	-	-	-	-	-	-	-	-	-	-	-	-	-	-	-	-	-	-	-	-	-
AX-147264426	Araip.B10	115833661	Mag2	-	-	-	-	-	-	-	-	-	-	-	-	-	-	-	-	-	-	-	-	-	-	-	-	-	-	-	-	-	-	-	-	-	-	-	-	-	-	-	-	-	-	-	-	-	Mag1
AX-177639479	Araip.B10	116395569	Mag2	-	-	-	-	-	-	-	-	-	-	-	-	-	-	-	-	-	-	-	-	-	-	-	-	-	-	-	-	-	-	-	-	-	-	-	-	-	-	-	-	-	-	-	-	-	Mag1
AX-147264444	Araip.B10	116784871	-	-	-	-	-	-	-	-	-	-	-	-	-	-	-	-	-	-	-	-	-	-	-	-	-	-	-	-	-	-	-	-	-	-	-	-	-	-	-	-	-	-	-	-	-	-	-
AX-147264511	Araip.B10	118693317	Mag2	-	-	-	-	-	-	-	-	-	-	-	-	-	-	-	-	-	-	-	-	-	-	-	-	-	-	-	-	-	-	-	-	-	-	-	-	-	-	-	-	-	-	-	Mag1	-	Mag1
AX-176791558	Araip.B10	119275183	Mag2	-	-	-	-	-	-	-	-	-	-	-	-	-	-	-	-	-	-	-	-	-	-	-	-	-	-	-	-	-	-	-	-	-	-	-	-	-	-	-	-	-	-	-	-	-	Mag1
AX-176791820	Araip.B10	123961122	Mag2	-	-	-	-	-	-	-	-	-	-	-	-	-	-	-	-	-	-	-	-	-	-	-	-	-	-	-	-	-	-	-	-	-	-	-	-	-	-	-	-	-	-	-	-	-	Mag1
AX-147264750	Araip.B10	125927111	Mag2	-	-	-	-	-	-	-	-	-	-	-	-	-	-	-	-	-	-	-	-	-	-	-	-	-	-	-	-	-	-	-	-	-	-	-	-	-	-	-	-	-	-	-	-	-	Mag1
AX-177639345	Araip.B10	126150964	Mag2	-	-	-	-	-	-	-	-	-	-	-	-	-	-	-	-	-	-	-	-	-	-	-	-	-	-	-	-	-	-	-	-	-	-	-	-	-	-	-	-	-	-	-	-	-	Mag1
AX-147264825	Araip.B10	128125458	Mag2	-	-	-	-	-	-	-	-	-	-	-	-	-	-	-	-	-	-	-	-	-	-	-	-	-	-	-	-	-	Mag1	-	-	-	-	-	-	-	-	-	-	-	-	-	-	-	Mag1
AX-176791475	Araip.B10	129422452	-	-	-	-	-	-	-	-	-	-	-	-	-	-	-	-	-	-	-	-	-	-	-	-	-	-	-	-	-	-	-	-	-	-	-	-	-	-	-	-	-	-	-	-	-	-	Mag1
AX-147264913	Araip.B10	130237287	Mag2	-	-	-	-	-	-	-	-	-	-	-	-	-	-	-	-	-	-	-	-	-	-	-	-	-	-	-	-	-	-	-	-	-	-	-	-	-	-	-	-	-	-	-	-	-	-
AX-147264945	Araip.B10	130799987	Mag2	-	-	-	-	-	-	-	-	-	-	-	-	-	-	-	-	-	-	-	-	-	-	-	-	-	-	-	-	-	-	-	-	-	-	-	-	-	-	-	-	-	-	-	-	-	-
AX-147265042	Araip.B10	131806031	Mag2	-	-	-	-	-	-	-	-	-	-	-	-	-	-	-	-	-	-	-	-	-	-	-	-	-	-	-	-	-	-	-	-	-	-	-	-	-	-	-	-	-	-	-	-	-	-
AX-176791882	Araip.B10	131908361	Mag2	-	-	-	-	-	-	-	-	-	-	-	-	-	-	-	-	-	-	-	-	-	-	-	-	-	-	-	-	-	-	-	-	-	-	-	-	-	-	-	-	-	-	-	-	-	-
AX-177642086	Araip.B10	133289435	Mag1	-	-	-	-	-	-	-	-	-	-	-	-	-	-	-	-	-	-	-	-	-	-	-	-	-	-	-	-	-	-	-	-	-	-	-	-	-	-	-	-	-	-	-	-	-	-
AX-176791643	Araip.B10	133449357	Mag1	-	-	-	-	-	-	-	-	-	-	-	-	-	-	-	-	-	-	-	-	-	-	-	-	-	-	-	-	-	-	-	-	-	-	-	-	-	-	-	-	-	-	-	-	-	-
AX-147265254	Araip.B10	133759254	Mag2	-	-	-	-	-	-	-	-	-	-	-	-	-	-	-	-	-	-	-	-	-	-	-	-	-	-	-	-	-	-	-	-	-	-	-	-	-	-	-	-	-	-	-	-	-	-
AX-147265272	Araip.B10	133880109	Mag2	-	-	-	-	-	-	-	-	-	-	-	-	-	-	-	-	-	-	-	-	-	-	-	-	-	-	-	-	-	-	-	-	-	-	-	-	-	-	-	-	-	-	-	-	-	-
AX-177643056	Araip.B10	133954862	Mag2	-	-	-	-	-	-	-	-	-	-	-	-	-	-	-	-	-	-	-	-	-	-	-	-	-	-	-	-	-	-	-	-	-	-	-	-	-	-	-	-	-	-	-	-	-	-
AX-147265291	Araip.B10	133973530	Mag2	-	-	-	-	-	-	-	-	-	-	-	-	-	-	-	-	-	-	-	-	-	-	-	-	-	-	-	-	-	-	-	-	-	-	-	-	-	-	-	-	-	-	-	-	-	-
AX-147265307	Araip.B10	134076186	Mag2	-	-	-	-	-	-	-	-	-	-	-	-	-	-	-	-	-	-	-	-	-	-	-	-	-	-	-	-	-	-	-	-	-	-	-	-	-	-	-	-	-	-	-	-	-	-
AX-147265486	Araip.B10	135303526	Mag2	-	-	-	-	-	-	-	-	-	-	-	-	-	-	-	-	-	-	-	-	-	-	-	-	-	-	-	-	-	-	-	-	-	-	-	-	-	-	-	-	-	-	-	-	-	-
AX-147265500	Araip.B10	135518938	Mag2	-	-	-	-	-	-	-	-	-	-	-	-	-	-	-	-	-	-	-	-	-	-	-	-	-	-	-	-	-	-	-	-	-	-	-	-	-	-	-	-	-	-	-	-	-	-
AX-147265510	Araip.B10	135552827	Mag2	-	-	-	-	-	-	-	-	-	-	-	-	-	-	-	-	-	-	-	-	-	-	-	-	-	-	-	-	-	-	-	-	-	-	-	-	-	-	-	-	-	-	-	-	-	-
AX-177639120	Araip.B10	135713446	Mag2	-	-	-	-	-	-	-	-	-	-	-	-	-	-	-	-	-	-	-	-	-	-	-	-	-	-	-	-	-	-	-	-	-	-	-	-	-	-	-	-	-	-	-	-	-	-
AX-147237311	Araip.B10	135771077	Mag1	-	-	-	-	-	-	-	-	-	-	-	-	-	-	-	-	-	-	-	-	-	-	-	-	-	-	-	-	-	-	-	-	-	-	-	-	-	-	-	-	-	-	-	-	-	-
AX-147265545	Araip.B10	135808237	Mag2	-	-	-	-	-	-	-	-	-	-	-	-	-	-	-	-	-	-	-	-	-	-	-	-	-	-	-	-	-	-	-	-	-	-	-	-	-	-	-	-	-	-	-	-	-	-
[truncated: 1,181 more columns]

## Sheet: 31 lines
	Generation		BC3F5	BC3F5	BC3F5	BC3F5	BC3F5	BC3F5	BC3F5	BC3F5	BC3F5	BC3F5	BC3F5	BC3F5	BC3F5	BC3F5	BC3F5	BC3F5	BC3F5	BC3F5	BC3F5	BC3F5	BC3F5		BC4F2	BC4F2	BC4F2	BC4F2	BC4F2	BC4F2	BC4F2	BC4F2	BC4F2	BC4F2
	Plant		Ar 092 A (78)-13-22-7-c50-1	Ar 092 A (78)-13-12-4-c42-1	Ar 092 A (78)-13-12-5-c43-2	Ar 092 A (78)-4-16-4-c25-1	Ar 090 A (41)-13-8-1-c14-1	Ar 092 A (78)-13-21-5-c49-3	Ar 092 A (78)-13-12-6-c44-1 or 2?	Ar 092 A (78)-13-12-1-c39-4	Ar 092 A (78)-13-12-5-c43-5	Ar 092 A (78)-13-12-5-c43-4	Ar 092 A (78)-13-12-7-c46-1	Ar 092 A (78)-13-12-7-c46-5	Ar 092 A (78)-13-12-7-c46-3	Ar 092 A (78)-4-16-4-c25-2	Ar 092 A (78)-13-12-7-c46-2	Ar 092 A (78)-13-11-5-c35-3	Ar 092 A (78)-13-12-4-c42-2	Ar 092 A (78)-4-16-1-c22-1	Ar 092 A (78)-13-11-6-c36-1	Ar 092 A (78)-4-19-3-c27-2	Ar 092 A (78)-13-12-7-c46-4		Ar124A-22-c40-1	Ar124A-25-c44-1	Ar124A-36-c52-10	Ar124A-47-c57-2	Ar124A-31-c47-2	Ar124A-40-c55-8	Ar124A-44-c56-3	Ar124A-26-c45-10	Ar124A-36-c52-8	Ar124A-24-c43-5
	LLS		2	1	1	2	2	1.5	1.5	2	1.5	1	2.5	1.5	1.5	1.5	1.5	1.5	1.5	2	1	1.5	1.5		1.5	1.5	2.5	2.5	2.5	2	2	2.5	2.5	2.5
	Rust		0	0	0	0	0	0	0	0	0	0	0	0	0	0	0	0	0	0	0	0	0		1	1	1	1	1	1	1	1	1.5	1
	Yield		417.2	354.4	347.9	338.7	330.1	327.5	325.7	314.2	312	306.7	299.1	297	296.2	285.1	277.3	274.8	268.6	260.9	258.2	257.3	254.3		311.8	216.8	302.2	268.2	262.6	247.8	243.6	224.2	222.2	221.1
	% stenosperma		20.5248	15.3918	7.86517	21.3483	20.6379	20.7156	15.4494	10.3448	26.6986	15.493	15.5929	14.2322	14.0449	13.8318	14.2724	20.2844	15.493	15.4139	10.6443	20.4159	15.197		15.3409	15.435	3.82106	15.3558	17.5258	10.7577	19.5327	19.382	15.4784	13.7512
	% magna		14.4192	15.8177	17.8046	12.8171	13.1544	13.0841	15.9517	12.5837	14.9584	15.7965	15.8389	15.747	16.0428	10.8725	15.8602	17.4497	15.7682	14.0731	18.7416	13.557	16.5554		14.324	14.4966	13.5207	8.42246	13.9001	10.6952	14.0187	9.65147	13.5027	13.4487
Chromosome	Position		Ar 092 A (78)-13-22-7-c50-1	Ar 092 A (78)-13-12-4-c42-1	Ar 092 A (78)-13-12-5-c43-2	Ar 092 A (78)-4-16-4-c25-1	Ar 090 A (41)-13-8-1-c14-1	Ar 092 A (78)-13-21-5-c49-3	Ar 092 A (78)-13-12-6-c44-1	Ar 092 A (78)-13-12-1-c39-4	Ar 092 A (78)-13-12-5-c43-5	Ar 092 A (78)-13-12-5-c43-4	Ar 092 A (78)-13-12-7-c46-1	Ar 092 A (78)-13-12-7-c46-5	Ar 092 A (78)-13-12-7-c46-3	Ar 092 A (78)-4-16-4-c25-2	Ar 092 A (78)-13-12-7-c46-2	Ar 092 A (78)-13-11-5-c35-3	Ar 092 A (78)-13-12-4-c42-2	Ar 092 A (78)-4-16-1-c22-1	Ar 092 A (78)-13-11-6-c36-1	Ar 092 A (78)-4-19-3-c27-2	Ar 092 A (78)-13-12-7-c46-4		Ar124A-22-c40-1	Ar124A-25-c44-1	Ar124A-36-c52-10	Ar124A-47-c57-2	Ar124A-31-c47-2	Ar124A-40-c55-8	Ar124A-44-c56-3	Ar124A-26-c45-10	Ar124A-36-c52-8	Ar124A-24-c43-5
Aradu.A01	230496		-	-	-	-	-	-	-	-	-	-	-	-	-	-	-	-	-	-	-	-	-		-	-	-	-	-	-	-	-	-	-
Aradu.A01	510521		-	-	-	-	-	-	-	-	-	-	-	-	-	-	-	-	-	-	-	-	-		-	-	-	-	-	-	-	-	-	-
Aradu.A01	595640		-	-	-	-	-	-	-	-	-	-	-	-	-	-	-	-	-	-	-	-	-		-	-	-	-	-	-	-	-	-	-
Aradu.A01	738171		-	-	-	-	-	-	-	-	-	-	-	-	-	-	-	-	-	-	-	-	-		-	-	-	-	-	-	-	-	-	-
Aradu.A01	748457		-	-	-	-	-	-	-	-	-	-	-	-	-	-	-	-	-	-	-	-	-		-	-	-	-	-	-	-	-	-	-
Aradu.A01	773107		-	-	-	-	-	-	-	-	-	-	-	-	-	-	-	-	-	-	-	-	-		-	-	-	-	-	-	-	-	-	-
Aradu.A01	785346		-	-	-	-	-	-	-	-	-	-	-	-	-	-	-	-	-	-	-	-	-		-	-	-	-	-	-	-	-	-	-
Aradu.A01	795710		-	-	-	-	-	-	-	-	-	-	-	-	-	-	-	-	-	-	-	-	-		-	-	-	-	-	-	-	-	-	-
Aradu.A01	907490		-	-	-	-	-	-	-	-	-	-	-	-	-	-	-	-	-	-	-	-	-		-	-	-	-	-	-	-	-	-	-
Aradu.A01	922352		-	-	-	-	-	-	-	-	-	-	-	-	-	-	-	-	-	-	-	-	-		-	-	-	-	-	-	-	-	-	-
Aradu.A01	1006721		-	-	-	-	-	-	-	-	-	-	-	-	-	-	-	-	-	-	-	-	-		-	-	-	-	-	-	-	-	-	-
Aradu.A01	1040768		-	-	-	-	-	-	-	-	-	-	-	-	-	-	-	-	-	-	-	-	-		-	-	-	-	-	-	-	-	-	-
Aradu.A01	1043415		-	-	-	-	-	-	-	-	-	-	-	-	-	-	-	-	-	-	-	-	-		-	-	-	-	-	-	-	-	-	-
Aradu.A01	1117391		-	-	-	-	-	-	-	-	-	-	-	-	-	-	-	-	-	-	-	-	-		-	-	-	-	-	-	-	-	-	-
Aradu.A01	1117549		-	-	-	-	-	-	-	-	-	-	-	-	-	-	-	-	-	-	-	-	-		-	-	-	-	-	-	-	-	-	-
Aradu.A01	1185064		-	-	-	-	-	-	-	-	-	-	-	-	-	-	-	-	-	-	-	-	-		-	-	-	-	-	-	-	-	-	-
Aradu.A01	1397197		-	-	-	-	-	-	-	-	-	-	-	-	-	-	-	-	-	-	-	-	-		-	-	-	-	-	-	-	-	-	-
Aradu.A01	1399041		-	-	-	-	-	-	-	-	-	-	-	-	-	-	-	-	-	-	-	-	-		-	-	-	-	-	-	-	-	-	-
Aradu.A01	1399658		-	-	-	-	-	-	-	-	-	-	-	-	-	-	-	-	-	-	-	-	-		-	-	-	-	-	-	-	-	-	-
Aradu.A01	1427181		-	-	-	-	-	-	-	-	-	-	-	-	-	-	-	-	-	-	-	-	-		-	-	-	-	-	-	-	-	-	-
Aradu.A01	1450824		-	-	-	-	-	-	-	-	-	-	-	-	-	-	-	-	-	-	-	-	-		-	-	-	-	-	-	-	-	-	-
Aradu.A01	1651483		-	-	-	-	-	-	-	-	-	-	-	-	-	-	-	-	-	-	-	-	-		-	-	-	-	-	-	-	-	-	-
Aradu.A01	1705064		-	-	-	-	-	-	-	-	-	-	-	-	-	-	-	-	-	-	-	-	-		-	-	-	-	-	-	-	-	-	-
Aradu.A01	1724608		-	-	-	-	-	-	-	-	-	-	-	-	-	-	-	-	-	-	-	-	-		-	-	-	-	-	-	-	-	-	-
Aradu.A01	1734212		-	-	-	-	-	-	-	-	-	-	-	-	-	-	-	-	-	-	-	-	-		-	-	-	-	-	-	-	-	-	-
Aradu.A01	1777026		-	-	-	-	-	-	-	-	-	-	-	-	-	-	-	-	-	-	-	-	-		-	-	-	-	-	-	-	-	-	-
Aradu.A01	1783428		-	-	-	-	-	-	-	-	-	-	-	-	-	-	-	-	-	-	-	-	-		-	-	-	-	-	-	-	-	-	-
Aradu.A01	1788137		-	-	-	-	-	-	-	-	-	-	-	-	-	-	-	-	-	-	-	-	-		-	-	-	-	-	-	-	-	-	-
Aradu.A01	1845128		-	-	-	-	-	-	-	-	-	-	-	-	-	-	-	-	-	-	-	-	-		-	-	-	-	-	-	-	-	-	-
Aradu.A01	1873370		-	-	-	-	-	-	-	-	-	-	-	-	-	-	-	-	-	-	-	-	-		-	-	-	-	-	-	-	-	-	-
Aradu.A01	1916852		-	-	-	-	-	-	-	-	-	-	-	-	-	-	-	-	-	-	-	-	-		-	-	-	-	-	-	-	-	-	-
Aradu.A01	1950993		-	-	-	-	-	-	-	-	-	-	-	-	-	-	-	-	-	-	-	-	-		-	-	-	-	-	-	-	-	-	-
Aradu.A01	1979329		-	-	-	-	-	-	-	-	-	-	-	-	-	-	-	-	-	-	-	-	-		-	-	-	-	-	-	-	-	-	-
Aradu.A01	1984099		-	-	-	-	-	-	-	-	-	-	-	-	-	-	-	-	-	-	-	-	-		-	-	-	-	-	-	-	-	-	-
Aradu.A01	2010272		-	-	-	-	-	-	-	-	-	-	-	-	-	-	-	-	-	-	-	-	-		-	-	-	-	-	-	-	-	-	-
Aradu.A01	2010809		-	-	-	-	-	-	-	-	-	-	-	-	-	-	-	-	-	-	-	-	-		-	-	-	-	-	-	-	-	-	-
Aradu.A01	2110707		-	-	-	-	-	-	-	-	-	-	-	-	-	-	-	-	-	-	-	-	-		-	-	-	-	-	-	-	-	-	-
Aradu.A01	2272833		-	-	-	-	-	-	-	-	-	-	-	-	-	-	-	-	-	-	-	-	-		-	-	-	-	-	-	-	-	-	-
Aradu.A01	2278223		-	-	-	-	-	-	-	-	-	-	-	-	-	-	-	-	-	-	-	-	-		-	-	-	-	-	-	-	-	-	-
Aradu.A01	2303999		-	-	-	-	-	-	-	-	-	-	-	-	-	-	-	-	-	-	-	-	-		-	-	-	-	-	-	-	-	-	-
Aradu.A01	2304266		-	-	-	-	-	-	-	-	-	-	-	-	-	-	-	-	-	-	-	-	-		-	-	-	-	-	-	-	-	-	-
Aradu.A01	2434150		-	-	-	-	-	-	-	-	-	-	-	-	-	-	-	-	-	-	-	-	-		-	-	-	-	-	-	-	-	-	-
Aradu.A01	2439513		-	-	-	-	-	-	-	-	-	-	-	-	-	-	-	-	-	-	-	-	-		-	-	-	-	-	-	-	-	-	-
Aradu.A01	2784796		-	-	-	-	-	-	-	-	-	-	-	-	-	-	-	-	-	-	-	-	-		-	-	-	-	-	-	-	-	-	-
Aradu.A01	2897855		-	-	-	-	-	-	-	-	-	-	-	-	-	-	-	-	-	-	-	-	-		-	-	-	-	-	-	-	-	-	-
Aradu.A01	3034640		-	-	-	-	-	-	-	-	-	-	-	-	-	-	-	-	-	-	-	-	-		-	-	-	-	-	-	-	-	-	-
Aradu.A01	3071017		-	-	-	-	-	-	-	-	-	-	-	-	-	-	-	-	-	-	-	-	-		-	-	-	-	-	-	-	-	-	-
Aradu.A01	3120188		-	-	-	-	-	-	-	-	-	-	-	-	-	-	-	-	-	-	-	-	-		-	-	-	-	-	-	-	-	-	-
Aradu.A01	3120434		-	-	-	-	-	-	-	-	-	-	-	-	-	-	-	-	-	-	-	-	-		-	-	-	-	-	-	-	-	-	-
Aradu.A01	3128533		-	-	-	-	-	-	-	-	-	-	-	-	-	-	-	-	-	-	-	-	-		-	-	-	-	-	-	-	-	-	-
Aradu.A01	3171803		-	-	-	-	-	-	-	-	-	-	-	-	-	-	-	-	-	-	-	-	-		-	-	-	-	-	-	-	-	-	-
Aradu.A01	3173724		-	-	-	-	-	-	-	-	-	-	-	-	-	-	-	-	-	-	-	-	-		-	-	-	-	-	-	-	-	-	-
Aradu.A01	3331989		-	-	-	-	-	-	-	-	-	-	-	-	-	-	-	-	-	-	-	-	-		-	-	-	-	-	-	-	-	-	-
Aradu.A01	3335170		-	-	-	-	-	-	-	-	-	-	-	-	-	-	-	-	-	-	-	-	-		-	-	-	-	-	-	-	-	-	-
Aradu.A01	3362317		-	-	-	-	-	-	-	-	-	-	-	-	-	-	-	-	-	-	-	-	-		-	-	-	-	-	-	-	-	-	-
Aradu.A01	3438883		-	-	-	-	-	-	-	-	-	-	-	-	-	-	-	-	-	-	-	-	-		-	-	-	-	-	-	-	-	-	-
Aradu.A01	3441950		-	-	-	-	-	-	-	-	-	-	-	-	-	-	-	-	-	-	-	-	-		-	-	-	-	-	-	-	-	-	-
Aradu.A01	3454654		-	-	-	-	-	-	-	-	-	-	-	-	-	-	-	-	-	-	-	-	-		-	-	-	-	-	-	-	-	-	-
Aradu.A01	3460850		-	-	-	-	-	-	-	-	-	-	-	-	-	-	-	-	-	-	-	-	-		-	-	-	-	-	-	-	-	-	-
Aradu.A01	3462248		-	-	-	-	-	-	-	-	-	-	-	-	-	-	-	-	-	-	-	-	-		-	-	-	-	-	-	-	-	-	-
Aradu.A01	3611395		-	-	-	-	-	-	-	-	-	-	-	-	-	-	-	-	-	-	-	-	-		-	-	-	-	-	-	-	-	-	-
Aradu.A01	3665567		-	-	-	-	-	-	-	-	-	-	-	-	-	-	-	-	-	-	-	-	-		-	-	-	-	-	-	-	-	-	-
Aradu.A01	3750316		-	-	-	-	-	-	-	-	-	-	-	-	-	-	-	-	-	-	-	-	-		-	-	-	-	-	-	-	-	-	-
Aradu.A01	3845309		-	-	-	-	-	-	-	-	-	-	-	-	-	-	-	-	-	-	-	-	-		-	-	-	-	-	-	-	-	-	-
Aradu.A01	3857470		-	-	-	-	-	-	-	-	-	-	-	-	-	-	-	-	-	-	-	-	-		-	-	-	-	-	-	-	-	-	-
Aradu.A01	3864763		-	-	-	-	-	-	-	-	-	-	-	-	-	-	-	-	-	-	-	-	-		-	-	-	-	-	-	-	-	-	-
Aradu.A01	3947660		-	-	-	-	-	-	-	-	-	-	-	-	-	-	-	-	-	-	-	-	-		-	-	-	-	-	-	-	-	-	-
Aradu.A01	3986510		-	-	-	-	-	-	-	-	-	-	-	-	-	-	-	-	-	-	-	-	-		-	-	-	-	-	-	-	-	-	-
Aradu.A01	4143724		-	-	-	-	-	-	-	-	-	-	-	-	-	-	-	-	-	-	-	-	-		-	-	-	-	-	-	-	-	-	-
Aradu.A01	4147264		-	-	-	-	-	-	-	-	-	-	-	-	-	-	-	-	-	-	-	-	-		-	-	-	-	-	-	-	-	-	-
Aradu.A01	4472019		-	-	-	-	-	-	-	-	-	-	-	-	-	-	-	-	-	-	-	-	-		-	-	-	-	-	-	-	-	-	-
Aradu.A01	4568812		-	-	-	-	-	-	-	-	-	-	-	-	-	-	-	-	-	-	-	-	-		-	-	-	-	-	-	-	-	-	-
Aradu.A01	4678382		-	-	-	-	-	-	-	-	-	-	-	-	-	-	-	-	-	-	-	-	-		-	-	-	-	-	-	-	-	-	-
Aradu.A01	4889328		-	-	-	-	-	-	-	-	-	-	-	-	-	-	-	-	-	-	-	-	-		-	-	-	-	-	-	-	-	-	-
Aradu.A01	4901872		-	-	-	-	-	-	-	-	-	-	-	-	-	-	-	-	-	-	-	-	-		-	-	-	-	-	-	-	-	-	-
Aradu.A01	4956444		-	-	-	-	-	-	-	-	-	-	-	-	-	-	-	-	-	-	-	-	-		-	-	-	-	-	-	-	-	-	-
Aradu.A01	4971720		-	-	-	-	-	-	-	-	-	-	-	-	-	-	-	-	-	-	-	-	-		-	-	-	-	-	-	-	-	-	-
Aradu.A01	4971756		-	-	-	-	-	-	-	-	-	-	-	-	-	-	-	-	-	-	-	-	-		-	-	-	-	-	-	-	-	-	-
Aradu.A01	5361582		-	-	-	-	-	-	-	-	-	-	-	-	-	-	-	-	-	-	-	-	-		-	-	-	-	-	-	-	-	-	-
Aradu.A01	5589971		-	-	-	-	-	-	-	-	-	-	-	-	-	-	-	-	-	-	-	-	-		-	-	-	-	-	-	-	-	-	-
Aradu.A01	6096023		-	-	-	-	-	-	-	-	Sten1	-	-	-	-	-	-	-	-	-	-	-	-		-	-	-	-	-	-	-	-	-	-
Aradu.A01	6200658		-	-	-	-	-	-	-	-	-	-	-	-	-	-	-	-	-	-	-	-	-		-	-	-	-	-	-	-	-	-	-
Aradu.A01	6337729		-	-	-	-	-	-	-	-	-	-	-	-	-	-	-	-	-	-	-	-	-		-	-	-	-	-	-	-	-	-	-
Aradu.A01	6679029		-	-	-	-	-	-	-	-	-	-	-	-	-	-	-	-	-	-	-	-	-		-	-	-	-	-	-	-	-	-	-
Aradu.A01	6679084		-	-	-	-	-	-	-	-	-	-	-	-	-	-	-	-	-	-	-	-	-		-	-	-	-	-	-	-	-	-	-
Aradu.A01	6679326		-	-	-	-	-	-	-	-	-	-	-	-	-	-	-	-	-	-	-	-	-		-	-	-	-	-	-	-	-	-	-
Aradu.A01	6679617		-	-	-	-	-	-	-	-	-	-	-	-	-	-	-	-	-	-	-	-	-		-	-	-	-	-	-	-	-	-	-
Aradu.A01	6794484		-	-	-	-	-	-	-	-	-	-	-	-	-	-	-	-	-	-	-	-	-		-	-	-	-	-	-	-	-	-	-
Aradu.A01	6797615		-	-	-	-	-	-	-	-	-	-	-	-	-	-	-	-	-	-	-	-	-		-	-	-	-	-	-	-	-	-	-
Aradu.A01	6921211		-	-	-	-	-	-	-	-	-	-	-	-	-	-	-	-	-	-	-	-	-		-	-	-	-	-	-	-	-	-	-
Aradu.A01	7002818		-	-	-	-	-	-	-	-	-	-	-	-	-	-	-	-	-	-	-	-	-		-	-	-	-	-	-	-	-	-	-
Aradu.A01	7260675		-	-	-	-	-	-	-	-	-	-	-	-	-	-	-	-	-	-	-	-	-		-	-	-	-	-	-	-	-	-	-
Aradu.A01	7778025		-	-	-	-	-	-	-	-	-	-	-	-	-	-	-	-	-	-	-	-	-		-	-	-	-	-	-	-	-	-	-
Aradu.A01	7778389		-	-	-	-	-	-	-	-	-	-	-	-	-	-	-	-	-	-	-	-	-		-	-	-	-	-	-	-	-	-	-
Aradu.A01	7840794		-	-	-	-	-	-	-	-	-	-	-	-	-	-	-	-	-	-	-	-	-		-	-	-	-	-	-	-	-	-	-
Aradu.A01	8070919		-	-	-	-	-	-	-	-	-	-	-	-	-	-	-	-	-	-	-	-	-		-	-	-	-	-	-	-	-	-	-
Aradu.A01	8318086		-	-	-	-	-	-	-	-	-	-	-	-	-	-	-	-	-	-	-	-	-		-	-	-	-	-	-	-	-	-	-
Aradu.A01	8483088		-	-	-	-	-	-	-	-	-	-	-	-	-	-	-	-	-	-	-	-	-		-	-	-	-	-	-	-	-	-	-
Aradu.A01	8785306		Sten1	-	-	Sten1	-	Sten1	-	-	-	-	-	-	-	-	-	Sten1	-	-	Sten1	Sten1	-		-	-	-	-	-	-	-	-	-	-
Aradu.A01	8944361		-	-	-	-	-	-	-	-	-	-	-	-	-	-	-	-	-	-	-	-	-		-	-	-	-	-	-	-	-	-	-
Aradu.A01	9601661		-	-	-	-	-	-	-	-	-	-	-	-	-	-	-	-	-	-	-	-	-		-	-	-	-	-	-	-	-	-	-
Aradu.A01	9616542		-	-	-	-	-	-	-	-	-	-	-	-	-	-	-	-	-	-	-	-	-		-	-	-	-	-	-	-	-	-	-
Aradu.A01	9683595		-	-	-	-	-	-	-	-	-	-	-	-	-	-	-	-	-	-	-	-	-		-	-	-	-	-	-	-	-	-	-
Aradu.A01	9732844		-	-	-	-	-	-	-	-	-	-	-	-	-	-	-	-	-	-	-	-	-		-	-	-	-	-	-	-	-	-	-
Aradu.A01	9851850		-	-	-	-	-	-	-	-	-	-	-	-	-	-	-	-	-	-	-	-	-		-	-	-	-	-	-	-	-	-	-
Aradu.A01	10362840		-	-	-	-	-	-	-	-	-	-	-	-	-	-	-	-	-	-	-	-	-		-	-	-	-	-	-	-	-	-	-
Aradu.A01	10363537		-	-	-	-	-	-	-	-	-	-	-	-	-	-	-	-	-	-	-	-	-		-	-	-	-	-	-	-	-	-	-
Aradu.A01	10368213		-	-	-	-	-	-	-	-	-	-	-	-	-	-	-	-	-	-	-	-	-		-	-	-	-	-	-	-	-	-	-
Aradu.A01	10400343		-	-	-	-	-	-	-	-	-	-	-	-	-	-	-	-	-	-	-	-	-		-	-	-	-	-	-	-	-	-	-
Aradu.A01	10877830		-	-	-	-	-	-	-	-	-	-	-	-	-	-	-	-	-	-	-	-	-		-	-	-	-	-	-	-	-	-	-
Aradu.A01	10951447		-	-	-	-	-	-	-	-	-	-	-	-	-	-	-	-	-	-	-	-	-		-	-	-	-	-	-	-	-	-	-
Aradu.A01	11117619		-	-	-	-	-	-	-	-	-	-	-	-	-	-	-	-	-	-	-	-	-		-	-	-	-	-	-	-	-	-	-
Aradu.A01	11376476		-	-	-	-	-	-	-	-	-	-	-	-	-	-	-	-	-	-	-	-	-		-	-	-	-	-	-	-	-	-	-
Aradu.A01	11401844		-	-	-	-	-	-	-	-	-	-	-	-	-	-	-	-	-	-	-	-	-		-	-	-	-	-	-	-	-	-	-
Aradu.A01	11416797		-	-	-	-	-	-	-	-	-	-	-	-	-	-	-	-	-	-	-	-	-		-	-	-	-	-	-	-	-	-	-
Aradu.A01	11604414		-	-	-	-	-	-	-	-	-	-	-	-	-	-	-	-	-	-	-	-	-		-	-	-	-	-	-	-	-	-	-
Aradu.A01	11617268		-	-	-	-	-	-	-	-	-	-	-	-	-	-	-	-	-	-	-	-	-		-	-	-	-	-	-	-	-	-	-
Aradu.A01	11756006		-	-	-	-	-	-	-	-	-	-	-	-	-	-	-	-	-	-	-	-	-		-	-	-	-	-	-	-	-	-	-
Aradu.A01	11796164		-	-	-	-	-	-	-	-	-	-	-	-	-	-	-	-	-	-	-	-	-		-	-	-	-	-	-	-	-	-	-
Aradu.A01	11922479		-	-	-	-	-	-	-	-	-	-	-	-	-	-	-	-	-	-	-	-	-		-	-	-	-	-	-	-	-	-	-
Aradu.A01	11971012		-	-	-	-	-	-	-	-	-	-	-	-	-	-	-	-	-	-	-	-	-		-	-	-	-	-	-	-	-	-	-
Aradu.A01	12011768		-	-	-	-	-	-	-	-	-	-	-	-	-	-	-	-	-	-	-	-	-		-	-	-	-	-	-	-	-	-	-
Aradu.A01	12593839		-	-	-	-	-	-	-	-	-	-	-	-	-	-	-	-	-	-	-	-	-		-	-	-	-	-	-	-	-	-	-
Aradu.A01	12610918		-	-	-	-	-	-	-	-	-	-	-	-	-	-	-	-	-	-	-	-	-		-	-	-	-	-	-	-	-	-	-
Aradu.A01	13507905		-	-	-	-	-	-	-	-	-	-	-	-	-	-	-	-	-	-	-	-	-		-	-	-	-	-	-	-	-	-	-
Aradu.A01	13788537		-	-	-	-	-	-	-	-	-	-	-	-	-	-	-	-	-	-	-	-	-		-	-	-	-	-	-	-	-	-	-
Aradu.A01	14044091		-	-	-	-	-	-	-	-	-	-	-	-	-	-	-	-	-	-	-	-	-		-	-	-	-	-	-	-	-	-	-
Aradu.A01	14652715		-	-	-	-	-	-	-	-	-	-	-	-	-	-	-	-	-	-	-	-	-		-	-	-	-	-	-	-	-	-	-
Aradu.A01	14895529		-	-	-	-	-	-	-	-	-	-	-	-	-	-	-	-	-	-	-	-	-		-	-	-	-	-	-	-	-	-	-
Aradu.A01	14897407		-	-	-	-	-	-	-	-	-	-	-	-	-	-	-	-	-	-	-	-	-		-	-	-	-	-	-	-	-	-	-
Aradu.A01	15260506		-	-	-	-	-	-	-	-	-	-	-	-	-	-	-	-	-	-	-	-	-		-	-	-	-	-	-	-	-	-	-
Aradu.A01	18623658		-	-	-	-	-	-	-	-	-	-	-	-	-	-	-	-	-	-	-	-	-		-	-	-	-	-	-	-	-	-	-
Aradu.A01	18638406		-	-	-	-	-	-	-	-	-	-	-	-	-	-	-	-	-	-	-	-	-		-	-	-	-	-	-	-	-	-	-
Aradu.A01	19089187		-	-	-	-	-	-	-	-	-	-	-	-	-	-	-	-	-	-	-	-	-		-	-	-	-	-	-	-	-	-	-
Aradu.A01	19206589		-	-	-	-	-	-	-	-	-	-	-	-	-	-	-	-	-	-	-	-	-		-	-	-	-	-	-	-	-	-	-
Aradu.A01	19878466		-	-	-	-	-	-	-	-	-	-	-	-	-	-	-	-	-	-	-	-	-		-	-	-	-	-	-	-	-	-	-
Aradu.A01	20832856		-	-	-	-	-	-	-	-	-	-	-	-	-	-	-	-	-	-	-	-	-		-	-	-	-	-	-	-	-	-	-
Aradu.A01	20833213		-	-	-	-	-	-	-	-	-	-	-	-	-	-	-	-	-	-	-	-	-		-	-	-	-	-	-	-	-	-	-
Aradu.A01	21197428		-	-	-	-	-	-	-	-	-	-	-	-	-	-	-	-	-	-	-	-	-		-	-	-	-	-	-	-	-	-	-
Aradu.A01	21307983		-	-	-	-	-	-	-	-	-	-	-	-	-	-	-	-	-	-	-	-	-		-	-	-	-	-	-	-	-	-	-
Aradu.A01	21309019		-	-	-	-	-	-	-	-	-	-	-	-	-	-	-	-	-	-	-	-	-		-	-	-	-	-	-	-	-	-	-
Aradu.A01	23821551		-	-	-	-	-	-	-	-	-	-	-	-	-	-	-	-	-	-	-	-	-		-	-	-	-	-	-	-	-	-	-
Aradu.A01	27224705		-	-	-	-	-	-	-	-	-	-	-	-	-	-	-	-	-	-	-	-	-		-	-	-	-	-	-	-	-	-	-
Aradu.A01	27229920		-	-	-	-	-	-	-	-	-	-	-	-	-	-	-	-	-	-	-	-	-		-	-	-	-	-	-	-	-	-	-
Aradu.A01	27742158		-	-	-	-	-	-	-	-	-	-	-	-	-	-	-	-	-	-	-	-	-		-	-	-	-	-	-	-	-	-	-
Aradu.A01	28149031		-	-	-	-	-	-	-	-	-	-	-	-	-	-	-	-	-	-	-	-	-		-	-	-	-	-	-	-	-	-	-
Aradu.A01	28191856		-	-	-	-	-	-	-	-	-	-	-	-	-	-	-	-	-	-	-	-	-		-	-	-	-	-	-	-	-	-	-
Aradu.A01	29419297		-	-	-	-	-	-	-	-	-	-	-	-	-	-	-	-	-	-	-	-	-		-	-	-	-	-	-	-	-	-	-
Aradu.A01	29554862		-	-	-	-	-	-	-	-	-	-	-	-	-	-	-	-	-	-	-	-	-		-	-	-	-	-	-	-	-	-	-
Aradu.A01	29854378		Sten1	Sten1	Sten1	Sten1	Sten1	Sten1	Sten1	Sten1	Sten1	Sten1	Sten1	Sten1	Sten1	Sten1	Sten1	Sten1	Sten1	Sten1	Sten1	Sten1	Sten1		-	-	-	-	-	-	-	-	-	-
Aradu.A01	30348130		-	-	-	-	-	-	-	-	-	-	-	-	-	-	-	-	-	-	-	-	-		-	-	-	-	-	-	-	-	-	-
Aradu.A01	30700040		-	-	-	-	-	-	-	-	-	-	-	-	-	-	-	-	-	-	-	-	-		-	-	-	-	-	-	-	-	-	-
Aradu.A01	32558513		-	-	-	-	-	-	-	-	-	-	-	-	-	-	-	-	-	-	-	-	-		-	-	-	-	-	-	-	-	-	-
Aradu.A01	36142331		-	-	-	-	-	-	-	-	-	-	-	-	-	-	-	-	-	-	-	-	-		-	-	-	-	-	-	-	-	-	-
Aradu.A01	37971393		-	-	-	-	-	-	-	-	-	-	-	-	-	-	-	-	-	-	-	-	-		-	-	-	-	-	-	-	-	-	-
Aradu.A01	39534179		-	-	-	-	-	-	-	-	-	-	-	-	-	-	-	-	-	-	-	-	-		-	-	-	-	-	-	-	-	-	-
Aradu.A01	42380436		-	-	-	-	-	-	-	-	Sten1	-	-	-	-	-	-	-	-	Sten1	Sten1	-	-		-	-	-	-	-	-	-	-	-	-
Aradu.A01	42972504		-	-	-	-	-	-	-	-	-	-	-	-	-	-	-	-	-	-	-	-	-		-	-	-	-	-	-	-	-	-	-
Aradu.A01	44307659		-	-	-	-	-	-	-	-	-	-	-	-	-	-	-	-	-	-	-	-	-		-	-	-	-	-	-	-	-	-	-
Aradu.A01	50181195		-	-	-	-	-	-	-	-	-	-	-	-	-	-	-	-	-	-	-	-	-		-	-	-	-	-	-	-	-	-	-
Aradu.A01	50260433		-	-	-	-	-	-	-	-	-	-	-	-	-	-	-	-	-	-	-	-	-		-	-	-	-	-	-	-	-	-	-
Aradu.A01	50292886		-	-	-	-	-	-	-	-	-	-	-	-	-	-	-	-	-	-	-	-	-		-	-	-	-	-	-	-	-	-	-
Aradu.A01	50383263		-	-	-	-	-	-	-	-	-	-	-	-	-	-	-	-	-	-	-	-	-		-	-	-	-	-	-	-	-	-	-
Aradu.A01	52613972		-	-	-	-	-	Sten1	-	Sten1	-	-	-	-	-	Sten1	-	-	-	-	-	Sten1	-		-	-	-	-	-	-	-	-	-	-
Aradu.A01	54777254		-	-	-	-	-	-	-	-	-	-	-	-	-	-	-	-	-	-	-	-	-		-	-	-	-	-	-	-	-	-	-
Aradu.A01	57140274		-	-	-	-	-	-	-	-	-	-	-	-	-	-	-	-	-	-	-	-	-		-	-	-	-	-	-	-	-	-	-
Aradu.A01	59525000		-	-	-	-	-	-	-	-	-	-	-	-	-	-	-	-	-	-	-	-	-		-	-	-	-	-	-	-	-	-	-
Aradu.A01	59525006		-	-	-	-	-	-	-	-	-	-	-	-	-	-	-	-	-	-	-	-	-		-	-	-	-	-	-	-	-	-	-
Aradu.A01	64429002		-	-	-	-	-	-	-	-	-	-	-	-	-	-	-	-	-	-	-	-	-		-	-	-	-	-	-	-	-	-	-
Aradu.A01	64545109		-	-	-	-	-	-	-	-	-	-	-	-	-	-	-	-	-	-	-	-	-		-	-	-	-	-	-	-	-	-	-
Aradu.A01	67371825		-	-	-	-	-	-	-	-	-	-	-	-	-	-	-	-	-	-	-	-	-		-	-	-	-	-	-	-	-	-	-
Aradu.A01	70251849		-	-	-	-	-	-	-	-	-	-	-	-	-	-	-	-	-	-	-	-	-		-	-	-	-	-	-	-	-	-	-
Aradu.A01	85136940		-	-	-	-	-	-	-	-	-	-	-	-	-	-	-	-	-	-	-	-	-		-	-	-	-	-	-	-	-	-	-
Aradu.A01	85609541		-	-	Sten1	-	-	-	-	-	-	-	Sten1	Sten1	-	-	-	-	-	-	-	Sten1	-		-	-	-	-	-	-	-	-	-	-
Aradu.A01	87053923		-	-	-	-	-	-	-	-	-	-	-	-	-	-	-	-	-	-	-	-	-		-	-	-	-	-	-	-	-	-	-
Aradu.A01	87096975		-	-	-	-	-	-	-	-	-	-	-	-	-	-	-	-	-	-	-	-	-		-	-	-	-	-	-	-	-	-	-
Aradu.A01	87187940		-	-	-	-	-	-	-	-	-	-	-	-	-	-	-	-	-	-	-	-	-		-	-	-	-	-	-	-	-	-	-
Aradu.A01	89680568		-	-	-	-	-	-	-	-	Sten1	-	-	-	-	-	-	-	-	-	-	-	-		-	-	-	-	-	-	-	-	-	-
Aradu.A01	89685851		-	-	-	-	-	-	-	-	-	-	-	-	-	-	-	-	-	-	-	-	-		-	-	-	-	-	-	-	-	-	-
Aradu.A01	91743419		-	-	-	-	-	-	-	-	-	-	-	-	-	-	-	-	-	-	-	-	-		-	-	-	-	-	-	-	-	-	-
Aradu.A01	92478990		-	-	-	-	-	-	-	-	-	-	-	-	-	-	-	-	-	-	-	-	-		-	-	-	-	-	-	-	-	-	-
Aradu.A01	92596134		-	-	-	-	-	-	-	-	-	-	-	-	-	-	-	-	-	-	-	-	-		-	-	-	-	-	-	-	-	-	-
Aradu.A01	94844203		-	-	-	-	-	-	-	-	-	-	-	-	-	-	-	-	-	-	-	-	-		-	-	-	-	-	-	-	-	-	-
Aradu.A01	94937390		-	-	-	-	-	-	-	-	-	-	-	-	-	-	-	-	-	-	-	-	-		-	-	-	-	-	-	-	-	-	-
Aradu.A01	95704657		-	-	-	-	-	-	-	-	-	-	-	-	-	-	-	-	-	-	-	-	-		-	-	-	-	-	-	-	-	-	-
Aradu.A01	96982501		Sten1	Sten1	Sten1	Sten1	Sten1	Sten1	Sten1	Sten1	Sten1	Sten1	Sten1	Sten1	Sten1	-	Sten1	Sten1	Sten1	-	Sten1	Sten1	-		-	-	-	-	-	-	-	-	-	-
Aradu.A01	97205940		-	-	-	-	-	-	-	-	-	-	-	-	-	-	-	-	-	-	-	-	-		-	-	-	-	-	-	-	-	-	-
Aradu.A01	97347534		-	-	-	-	-	-	-	-	-	-	-	-	-	-	-	-	-	-	-	-	-		-	-	-	-	-	-	-	-	-	-
Aradu.A01	97504048		-	-	-	-	-	-	-	-	-	-	-	-	-	-	-	-	-	-	-	-	-		-	-	-	-	-	-	-	-	-	-
Aradu.A01	97988649		-	-	-	-	-	-	-	-	-	-	-	-	-	-	-	-	-	-	-	-	-		-	-	-	-	-	-	-	-	-	-
Aradu.A01	98852433		-	-	-	-	-	-	-	-	-	-	-	-	-	-	-	-	-	-	-	-	-		-	-	-	-	-	-	-	-	-	-
Aradu.A01	99425091		-	-	-	-	-	-	-	-	-	-	-	-	-	-	-	-	-	-	-	-	-		-	-	-	-	-	-	-	-	-	-
Aradu.A01	99546596		-	-	-	-	-	-	-	-	-	-	-	-	-	-	-	-	-	-	-	-	-		-	-	-	-	-	-	-	-	-	-
Aradu.A01	100291833		-	-	-	-	-	-	-	-	-	-	-	-	-	-	-	-	-	-	-	-	-		-	-	-	-	-	-	-	-	-	-
Aradu.A01	100451974		-	-	-	-	-	-	-	-	-	-	-	-	-	-	-	-	-	-	-	-	-		-	-	-	-	-	-	-	-	-	-
Aradu.A01	100594409		-	-	-	-	-	-	-	-	-	-	-	-	-	-	-	-	-	-	-	-	-		-	-	-	-	-	-	-	-	-	-
Aradu.A01	102053529		-	-	-	-	-	-	-	-	-	-	-	-	-	-	-	-	-	-	-	-	-		-	-	-	-	-	-	-	-	-	-
Aradu.A01	102165459		-	-	-	-	-	-	-	-	-	-	-	-	-	-	-	-	-	-	-	-	-		-	-	-	-	-	-	-	-	-	-
Aradu.A01	102837904		-	-	-	-	-	-	-	-	-	-	-	-	-	-	-	-	-	-	-	-	-		-	-	-	-	-	-	-	-	-	-
Aradu.A01	103615126		-	-	-	-	-	-	-	-	-	-	-	-	-	-	-	-	-	-	-	-	-		-	-	-	-	-	-	-	-	-	-
Aradu.A01	103666559		-	-	-	-	-	-	-	-	-	-	-	-	-	-	-	-	-	-	-	-	-		-	-	-	-	-	-	-	-	-	-
Aradu.A01	104077042		-	-	-	-	-	-	-	-	-	-	-	-	-	-	-	-	-	-	-	-	-		-	-	-	-	-	-	-	-	-	-
Aradu.A01	104121701		-	-	-	-	-	-	-	-	-	-	-	-	-	-	-	-	-	-	-	-	-		-	-	-	-	-	-	-	-	-	-
Aradu.A01	104855229		-	-	-	-	-	-	-	-	-	-	-	-	-	-	-	-	-	-	-	-	-		-	-	-	-	-	-	-	-	-	-
Aradu.A01	105355893		-	-	-	-	-	-	-	-	-	-	-	-	-	-	-	-	-	-	-	-	-		-	-	-	-	-	-	-	-	-	-
Aradu.A01	106856793		-	-	-	-	-	-	-	-	-	-	-	-	-	-	-	-	-	-	-	-	-		-	-	-	-	-	-	-	-	-	-
Aradu.A02	107155		-	-	-	-	-	-	-	-	Sten2	-	-	-	-	-	-	-	Sten1	-	-	-	-		-	-	-	-	-	-	-	-	-	-
Aradu.A02	174898		-	-	-	-	-	-	-	-	Sten1	-	-	-	-	-	-	-	-	-	-	-	-		-	-	-	-	-	-	-	-	-	-
Aradu.A02	177786		-	-	-	-	-	-	-	-	-	-	-	-	-	-	-	-	-	-	-	-	-		-	-	-	-	-	-	-	-	-	-
Aradu.A02	314196		-	-	-	-	-	-	-	-	-	-	-	-	-	-	-	-	-	-	-	-	-		-	-	-	-	-	-	-	-	-	-
Aradu.A02	327195		-	-	-	-	-	-	-	-	-	-	-	-	-	-	-	-	-	-	-	-	-		-	-	-	-	-	-	-	-	-	-
Aradu.A02	328324		-	-	-	-	-	-	-	-	-	-	-	-	-	-	-	-	-	-	-	-	-		-	-	-	-	-	-	-	-	-	-
Aradu.A02	524914		-	-	-	-	-	-	-	-	Sten1	-	-	-	-	-	-	-	-	-	-	-	-		-	-	-	-	-	-	-	-	-	-
Aradu.A02	524938		-	-	-	-	-	-	-	-	-	-	-	-	-	-	-	-	-	-	-	-	-		-	-	-	-	-	-	-	-	-	-
Aradu.A02	529301		-	-	-	-	-	-	-	-	Sten1	-	-	-	-	-	-	-	-	-	-	-	-		-	-	-	-	-	-	-	-	-	-
Aradu.A02	549740		-	-	-	-	-	-	-	-	-	-	-	-	-	-	-	-	-	-	-	-	-		-	-	-	-	-	-	-	-	-	-
Aradu.A02	610745		-	-	-	-	-	-	-	-	Sten1	-	-	-	-	-	-	-	-	-	-	-	-		-	-	-	-	-	-	-	-	-	-
Aradu.A02	770726		-	-	-	-	-	-	-	-	-	-	-	-	-	-	-	-	-	-	-	-	-		-	-	-	-	-	-	-	-	-	-
Aradu.A02	771251		-	-	-	-	-	-	-	-	Sten1	-	-	-	-	-	-	-	-	-	-	-	-		-	-	-	-	-	-	-	-	-	-
Aradu.A02	805196		-	-	-	-	-	-	-	-	-	-	-	-	-	-	-	-	-	-	-	-	-		-	-	-	-	-	-	-	-	-	-
Aradu.A02	857614		-	-	-	-	-	-	-	-	Sten1	-	-	-	-	-	-	-	-	-	-	-	-		-	-	-	-	-	-	-	-	-	-
Aradu.A02	902287		-	-	-	-	-	-	-	-	Sten1	-	-	-	-	-	-	-	-	-	-	-	-		-	-	-	-	-	-	-	-	-	-
Aradu.A02	902714		-	-	-	-	-	-	-	-	Sten1	-	-	-	-	-	-	-	-	-	-	-	-		-	-	-	-	-	-	-	-	-	-
Aradu.A02	950880		-	-	-	-	-	-	-	-	-	-	-	-	-	-	-	-	-	-	-	-	-		-	-	-	-	-	-	-	-	-	-
Aradu.A02	1078390		-	-	-	-	-	-	-	-	Sten1	-	-	-	-	-	-	-	-	-	-	-	-		-	-	-	-	-	-	-	-	-	-
Aradu.A02	1173968		-	-	-	-	-	-	-	-	Sten1	-	-	-	-	-	-	-	-	-	-	-	-		-	-	-	-	-	-	-	-	-	-
Aradu.A02	1180998		-	-	-	-	-	-	-	-	-	-	-	-	-	-	-	-	-	-	-	-	-		-	-	-	-	-	-	-	-	-	-
Aradu.A02	1200821		-	-	-	-	-	-	-	-	Sten1	-	-	-	-	-	-	-	-	-	-	-	-		-	-	-	-	-	-	-	-	-	-
Aradu.A02	1225369		-	-	-	-	-	-	-	-	-	-	-	-	-	-	-	-	-	-	-	-	-		-	-	-	-	-	-	-	-	-	-
Aradu.A02	1333411		-	-	-	-	-	-	-	-	-	-	-	-	-	-	-	-	-	-	-	-	-		-	-	-	-	-	-	-	-	-	-
Aradu.A02	1444372		-	-	-	-	-	-	-	-	Sten1	-	-	-	-	-	-	-	Sten1	-	-	-	-		-	-	-	-	-	-	-	-	-	-
Aradu.A02	1556477		-	-	-	-	-	-	-	-	-	-	-	-	-	-	-	-	-	-	-	-	-		-	-	-	-	-	-	-	-	-	-
Aradu.A02	1756905		Sten1	Sten1	Sten1	Sten1	Sten1	Sten1	Sten1	Sten1	Sten1	Sten1	Sten1	Sten1	Sten1	Sten1	Sten1	Sten1	Sten1	Sten1	Sten1	Sten1	Sten1		-	-	-	-	-	-	-	-	-	-
Aradu.A02	1795704		-	-	-	-	-	-	-	-	-	-	-	-	-	-	-	-	-	-	-	-	-		-	-	-	-	-	-	-	-	-	-
Aradu.A02	2413776		-	-	-	-	-	-	-	-	Sten1	-	-	-	-	-	-	-	-	-	-	-	-		-	-	-	-	-	-	-	-	-	-
Aradu.A02	2483357		-	-	-	-	-	-	-	-	Sten1	-	-	-	-	-	-	-	-	-	-	-	-		-	-	-	-	-	-	-	-	-	-
Aradu.A02	2495254		-	-	-	-	-	-	-	-	Sten1	-	-	-	-	-	-	-	-	-	-	-	-		-	-	-	-	-	-	-	-	-	-
Aradu.A02	2495363		-	-	-	-	-	-	-	-	Sten1	-	-	-	-	-	-	-	-	-	-	-	-		-	-	-	-	-	-	-	-	-	-
Aradu.A02	2497226		-	-	-	-	-	-	-	-	Sten1	-	-	-	-	-	-	-	-	-	-	-	-		-	-	-	-	-	-	-	-	-	-
Aradu.A02	2530491		-	-	-	-	-	-	-	-	-	-	-	-	-	-	-	-	-	-	-	-	-		-	-	-	-	-	-	-	-	-	-
Aradu.A02	2557316		-	-	-	-	-	-	-	-	Sten1	-	-	-	-	-	-	-	-	-	-	-	-		-	-	-	-	-	-	-	-	-	-
Aradu.A02	2594478		-	-	-	-	-	-	-	-	Sten1	-	-	-	-	-	-	-	-	-	-	-	-		-	-	-	-	-	-	-	-	-	-
Aradu.A02	2595255		-	-	-	-	-	-	-	-	Sten1	-	-	-	-	-	-	-	-	-	-	-	-		-	-	-	-	-	-	-	-	-	-
Aradu.A02	2599915		-	-	-	-	-	-	-	-	Sten1	-	-	-	-	-	-	-	-	-	-	-	-		-	-	-	-	-	-	-	-	-	-
Aradu.A02	2640814		-	-	-	-	-	-	-	-	Sten1	-	-	-	-	-	-	-	-	-	-	-	-		-	-	-	-	-	-	-	-	-	-
Aradu.A02	2782248		-	-	-	-	-	-	-	-	-	-	-	-	-	-	-	-	-	-	-	-	-		-	-	-	-	-	-	-	-	-	-
Aradu.A02	2827935		-	-	-	-	-	-	-	-	Sten1	-	-	-	-	-	-	-	-	-	-	-	-		-	-	-	-	-	-	-	-	-	-
Aradu.A02	2931093		-	-	-	-	-	-	-	-	-	-	-	-	-	-	-	-	-	-	-	-	-		-	-	-	-	-	-	-	-	-	-
Aradu.A02	2931111		-	-	-	-	-	-	-	-	Sten1	-	-	-	-	-	-	-	-	-	-	-	-		-	-	-	-	-	-	-	-	-	-
Aradu.A02	2932724		-	-	-	-	-	-	-	-	Sten1	-	-	-	-	-	-	-	-	-	-	-	-		-	-	-	-	-	-	-	-	-	-
Aradu.A02	3001008		-	-	-	-	-	-	-	-	Sten1	-	-	-	-	-	-	-	-	-	-	-	-		-	-	-	-	-	-	-	-	-	-
Aradu.A02	3036319		-	-	-	-	-	-	-	-	Sten1	-	-	-	-	-	-	-	-	-	-	-	-		-	-	-	-	-	-	-	-	-	-
Aradu.A02	3040802		-	-	-	-	-	-	-	-	-	-	-	-	-	-	-	-	-	-	-	-	-		-	-	-	-	-	-	-	-	-	-
Aradu.A02	3049512		-	-	-	-	-	-	-	-	Sten1	-	-	-	-	-	-	-	-	-	-	-	-		-	-	-	-	-	-	-	-	-	-
Aradu.A02	3375612		-	-	-	-	-	-	-	-	Sten1	-	-	-	-	-	-	-	-	-	-	-	-		-	-	-	-	-	-	-	-	-	-
Aradu.A02	3377119		-	-	-	-	-	-	-	-	Sten1	-	-	-	-	-	-	-	-	-	-	-	-		-	-	-	-	-	-	-	-	-	-
Aradu.A02	3377383		-	-	-	-	-	-	-	-	Sten1	-	-	-	-	-	-	-	-	-	-	-	-		-	-	-	-	-	-	-	-	-	-
Aradu.A02	3486571		Sten2	Sten1	Sten1	Sten2	Sten1	Sten1	Sten1	-	Sten1	Sten1	Sten1	-	-	-	-	Sten2	Sten1	-	Sten2	Sten2	Sten1		Sten1	Sten2	-	Sten1	Sten2	-	Sten1	Sten1	Sten2	Sten1
Aradu.A02	3490189		Sten2	Sten1	Sten1	Sten2	Sten1	Sten1	Sten1	-	Sten1	Sten1	Sten1	-	-	-	-	Sten2	Sten1	-	Sten2	Sten2	Sten1		Sten1	Sten2	-	Sten1	Sten2	-	Sten1	Sten1	Sten2	Sten1
Aradu.A02	3666632		Sten1	Sten1	-	Sten1	Sten1	Sten1	Sten1	Sten1	Sten1	Sten1	Sten1	Sten1	Sten1	-	Sten1	Sten1	Sten1	Sten1	Sten1	-	Sten1		Sten1	Sten2	-	Sten1	-	-	Sten1	Sten1	-	Sten1
Aradu.A02	3667446		Sten2	Sten1	-	Sten2	Sten2	Sten1	-	Sten1	-	Sten2	Sten2	Sten2	Sten2	-	Sten2	Sten2	-	Sten1	Sten2	-	Sten2		Sten1	Sten2	-	Sten1	-	-	Sten1	Sten1	-	Sten1
Aradu.A02	3769110		Sten2	Sten1	Sten1	Sten2	Sten1	Sten1	Sten1	-	-	Sten1	Sten1	-	-	-	-	Sten2	Sten1	-	Sten2	Sten2	Sten1		Sten1	Sten2	-	Sten1	Sten2	-	Sten1	Sten1	Sten2	Sten1
Aradu.A02	3939035		Sten2	Sten1	Sten1	Sten2	Sten1	Sten1	Sten1	-	Sten1	Sten1	Sten1	-	-	-	-	Sten2	Sten1	-	Sten2	Sten2	Sten1		Sten1	Sten2	-	Sten1	Sten2	-	Sten1	Sten1	Sten2	Sten1
Aradu.A02	4085059		Sten1	-	-	Sten1	Sten1	-	-	-	Sten1	Sten1	-	-	-	-	-	Sten1	-	-	Sten1	Sten1	-		-	-	-	-	-	-	-	-	-	-
Aradu.A02	4403696		Sten2	Sten1	Sten1	Sten2	Sten1	Sten1	Sten1	-	Sten1	Sten2	Sten1	-	-	-	-	Sten2	Sten1	-	Sten2	Sten2	Sten1		Sten1	Sten1	-	Sten1	Sten2	-	Sten1	Sten1	Sten2	Sten1
Aradu.A02	4576169		-	-	-	-	-	-	-	-	-	-	-	-	-	-	-	-	-	-	-	-	-		-	-	-	-	-	-	-	-	-	-
Aradu.A02	4723506		Sten2	Sten1	Sten1	Sten2	Sten1	Sten1	Sten1	-	-	Sten2	Sten1	-	-	-	-	Sten2	Sten1	-	Sten2	Sten2	Sten1		Sten1	Sten1	-	Sten1	Sten2	-	Sten1	Sten1	Sten2	Sten1
Aradu.A02	4724850		Sten2	Sten1	Sten1	Sten2	Sten1	Sten1	Sten1	-	-	Sten2	Sten1	-	-	-	-	Sten2	Sten1	-	Sten2	Sten2	Sten1		Sten1	Sten1	-	Sten1	Sten2	-	Sten1	Sten1	Sten2	Sten1
Aradu.A02	4851345		Sten2	Sten1	Sten1	Sten2	Sten1	Sten1	Sten1	-	-	Sten2	Sten1	-	-	-	-	Sten2	Sten1	-	Sten2	Sten2	Sten1		Sten1	Sten1	-	Sten1	Sten2	-	Sten1	Sten1	Sten2	Sten1
Aradu.A02	4883639		Sten2	Sten1	Sten1	Sten2	Sten1	Sten1	Sten1	-	-	Sten2	Sten1	-	-	-	-	Sten2	Sten1	-	Sten2	Sten2	Sten1		Sten1	Sten1	-	Sten1	Sten2	-	Sten1	Sten1	Sten2	Sten1
Aradu.A02	4888203		Sten2	Sten1	Sten1	Sten2	Sten1	Sten1	Sten1	-	-	Sten2	Sten1	-	-	-	-	Sten2	Sten1	-	Sten2	Sten2	Sten1		Sten1	Sten1	-	Sten1	Sten2	-	Sten1	Sten1	Sten2	Sten1
Aradu.A02	4899160		Sten2	Sten1	Sten1	Sten2	Sten1	Sten1	Sten1	-	-	Sten2	Sten1	-	-	-	-	Sten2	Sten1	-	Sten2	Sten2	Sten1		Sten1	Sten1	-	Sten1	Sten2	-	Sten1	Sten1	Sten2	Sten1
Aradu.A02	5238703		Sten2	Sten1	Sten1	Sten2	Sten1	Sten1	Sten1	-	-	Sten2	Sten1	-	-	-	-	Sten2	Sten1	-	Sten2	Sten2	Sten1		Sten1	Sten1	-	Sten1	Sten2	-	Sten1	Sten1	Sten2	Sten1
Aradu.A02	5270226		Sten2	Sten1	Sten1	Sten2	Sten1	Sten1	Sten1	-	-	Sten2	Sten1	-	-	-	-	Sten2	Sten1	-	Sten2	Sten2	Sten1		Sten1	Sten1	-	Sten1	Sten2	-	Sten1	Sten1	Sten2	Sten1
Aradu.A02	5535443		Sten2	-	-	Sten2	Sten1	Sten1	-	-	-	-	-	-	-	-	-	Sten2	-	-	Sten2	Sten2	-		Sten1	Sten1	-	Sten1	Sten2	-	Sten1	Sten1	Sten2	Sten1
Aradu.A02	5537506		Sten2	-	-	Sten2	Sten1	Sten1	-	-	-	-	-	-	-	-	-	Sten2	-	-	Sten2	Sten2	-		Sten1	Sten1	-	Sten1	Sten2	-	Sten1	Sten1	Sten2	Sten1
Aradu.A02	5597149		Sten2	-	-	Sten2	Sten1	Sten1	-	-	-	-	-	-	-	-	-	Sten2	-	-	Sten2	Sten2	-		Sten1	Sten1	-	Sten1	Sten2	-	Sten1	Sten1	Sten2	Sten1
Aradu.A02	5796224		Sten2	-	-	Sten2	Sten1	Sten1	-	-	-	-	-	-	-	-	-	Sten2	-	-	Sten2	Sten2	-		Sten1	Sten1	-	Sten1	Sten2	-	Sten1	Sten1	Sten2	Sten1
Aradu.A02	5816135		Sten2	-	-	Sten2	Sten1	Sten1	-	-	-	-	-	-	-	-	-	Sten2	-	-	Sten2	Sten2	-		Sten1	Sten1	-	Sten1	Sten2	-	Sten1	Sten1	Sten2	Sten1
Aradu.A02	6341150		Sten2	-	-	Sten2	Sten1	Sten1	-	-	-	-	-	-	-	-	-	Sten2	-	-	Sten2	Sten2	-		Sten1	Sten1	-	Sten1	Sten2	-	Sten1	Sten1	Sten2	Sten1
Aradu.A02	6593512		Sten2	-	-	Sten2	Sten1	Sten1	-	-	-	-	-	-	-	-	-	Sten2	-	-	Sten2	Sten2	-		Sten1	Sten1	-	Sten1	Sten2	-	Sten1	Sten1	Sten2	Sten1
Aradu.A02	6827826		Sten2	-	-	Sten2	Sten1	Sten1	-	-	-	-	-	-	-	-	-	Sten2	-	-	Sten2	Sten2	-		Sten1	Sten1	-	Sten1	Sten2	-	Sten1	Sten1	Sten2	Sten1
Aradu.A02	8195496		Sten2	-	-	Sten2	Sten1	Sten1	-	-	-	-	-	-	-	-	-	Sten2	-	-	Sten2	Sten2	-		Sten1	Sten1	-	Sten1	Sten2	-	Sten1	Sten1	Sten2	Sten1
Aradu.A02	8377985		Sten2	-	-	Sten2	Sten1	Sten1	-	-	-	-	-	-	-	-	-	Sten2	-	-	Sten2	Sten2	-		Sten1	Sten1	-	Sten1	Sten2	-	Sten1	Sten1	Sten2	Sten1
Aradu.A02	8798082		Sten2	-	-	Sten2	Sten1	Sten1	-	-	-	-	-	-	-	-	-	Sten2	-	-	Sten2	Sten2	-		Sten1	Sten1	-	Sten1	Sten2	-	Sten1	Sten1	Sten2	Sten1
Aradu.A02	9782639		Sten2	-	-	Sten2	Sten1	Sten1	-	-	-	-	-	-	-	-	-	Sten2	-	-	Sten2	Sten2	-		Sten1	Sten1	-	Sten1	Sten2	-	Sten1	Sten1	Sten2	Sten1
Aradu.A02	10054069		Sten2	-	-	Sten2	Sten1	Sten1	-	-	-	-	-	-	-	-	-	Sten2	-	-	Sten2	Sten2	-		Sten1	Sten1	-	Sten1	Sten2	-	Sten1	Sten1	Sten2	Sten1
Aradu.A02	14728483		-	-	-	Sten1	-	-	-	-	-	-	-	-	-	-	-	Sten1	-	-	Sten1	Sten1	-		-	-	-	-	-	-	-	-	-	-
Aradu.A02	14937685		Sten2	-	-	Sten2	Sten1	Sten1	-	-	-	-	-	-	-	-	-	Sten2	-	-	Sten2	Sten2	-		Sten1	Sten1	-	Sten1	Sten2	-	Sten1	Sten1	Sten2	Sten1
Aradu.A02	14943833		Sten2	-	-	Sten2	Sten1	Sten1	-	-	-	-	-	-	-	-	-	Sten2	-	-	Sten2	Sten2	-		Sten1	Sten1	-	Sten1	Sten2	-	Sten1	Sten1	Sten2	Sten1
Aradu.A02	25951674		Sten2	-	-	Sten2	Sten1	Sten1	-	-	-	-	-	-	-	-	-	Sten2	-	-	Sten2	Sten2	-		Sten1	Sten1	-	Sten1	Sten2	-	Sten1	Sten1	Sten2	Sten1
Aradu.A02	28157230		Sten2	-	-	Sten2	Sten1	Sten1	-	-	-	-	-	-	-	-	-	Sten2	-	-	Sten2	Sten2	-		Sten1	Sten1	-	Sten1	Sten2	-	Sten1	Sten1	Sten2	Sten1
Aradu.A02	28574740		Sten2	-	-	Sten2	Sten1	Sten1	-	-	-	-	-	-	-	-	-	Sten2	-	-	Sten2	Sten2	-		Sten1	Sten1	-	Sten1	Sten2	-	Sten1	Sten1	Sten2	Sten1
Aradu.A02	30279507		Sten2	-	-	Sten2	Sten2	-	-	-	Sten1	-	-	-	-	-	-	Sten2	-	-	Sten2	Sten2	-		Sten1	Sten1	-	Sten1	-	-	Sten1	Sten1	Sten2	Sten1
Aradu.A02	32202107		Sten1	-	-	Sten1	Sten1	-	-	-	-	-	-	-	-	-	-	Sten1	-	-	Sten1	Sten1	-		Sten1	Sten1	-	Sten1	Sten2	-	Sten1	Sten1	Sten2	Sten1
Aradu.A02	33864947		Sten1	-	-	-	-	-	-	-	-	-	-	-	-	-	-	Sten1	-	-	Sten1	Sten1	-		Sten1	Sten1	-	Sten1	Sten2	-	Sten1	Sten1	Sten2	Sten1
Aradu.A02	36455473		Sten2	-	-	Sten2	Sten1	Sten1	-	-	-	-	-	-	-	-	-	Sten2	-	-	Sten2	Sten2	-		Sten1	Sten1	-	Sten1	Sten2	-	Sten1	Sten1	Sten2	Sten1
Aradu.A02	39267704		Sten2	-	-	Sten2	Sten1	Sten1	-	-	-	-	-	-	-	-	-	Sten2	-	-	Sten2	Sten2	-		Sten1	Sten1	-	Sten1	Sten2	-	Sten1	Sten1	Sten2	Sten1
Aradu.A02	42029329		Sten2	-	-	Sten2	Sten1	Sten1	-	-	-	-	-	-	-	-	-	Sten2	-	-	Sten2	Sten2	-		Sten1	Sten1	-	Sten1	Sten2	-	Sten1	Sten1	Sten2	Sten1
Aradu.A02	43374948		Sten2	-	-	Sten2	Sten1	Sten1	-	-	-	-	-	-	-	-	-	Sten2	-	-	Sten2	Sten2	-		Sten1	Sten1	-	Sten1	Sten2	-	Sten1	Sten1	Sten2	Sten1
Aradu.A02	47309222		Sten2	-	-	Sten2	Sten1	Sten1	-	-	-	-	-	-	-	-	-	Sten2	-	-	Sten2	Sten2	-		Sten1	Sten1	-	Sten1	Sten2	-	Sten1	Sten1	Sten2	Sten1
Aradu.A02	50000826		Sten2	-	-	Sten2	Sten1	Sten1	-	-	-	-	-	-	-	-	-	Sten2	-	-	Sten2	Sten2	-		Sten1	Sten1	-	Sten1	Sten2	-	Sten1	Sten1	Sten2	Sten1
Aradu.A02	52237448		Sten2	-	-	Sten2	Sten1	Sten1	-	-	-	-	-	-	-	-	-	Sten2	-	-	Sten2	Sten2	-		Sten1	Sten1	-	Sten1	Sten2	-	Sten1	Sten1	Sten2	Sten1
Aradu.A02	61811601		-	-	-	-	-	-	-	-	Sten1	-	-	-	-	-	-	-	-	Sten1	-	-	-		-	-	-	-	-	-	-	-	-	-
Aradu.A02	62077250		-	-	-	-	-	-	-	-	Sten1	-	-	-	-	-	-	-	-	Sten1	-	-	-		-	-	-	-	-	-	-	-	-	-
Aradu.A02	62739123		-	-	-	-	-	-	-	-	-	-	-	-	-	-	-	-	-	-	-	-	-		-	-	-	-	-	-	-	-	-	-
Aradu.A02	64315367		Sten2	-	-	Sten2	Sten1	Sten1	-	-	-	-	-	-	-	-	-	Sten2	-	-	Sten2	Sten2	-		Sten1	Sten1	-	Sten1	Sten2	-	Sten1	Sten1	Sten2	Sten1
Aradu.A02	65804378		-	-	-	-	-	-	-	-	-	-	-	-	-	-	-	-	-	-	-	-	-		-	-	-	-	-	-	-	-	-	-
Aradu.A02	66368426		Sten2	-	-	Sten2	Sten1	Sten1	-	-	-	-	-	-	-	-	-	Sten2	-	-	Sten2	Sten2	-		Sten1	Sten1	-	Sten1	Sten2	-	Sten1	Sten1	Sten2	Sten1
Aradu.A02	67017415		Sten2	-	-	Sten2	Sten1	-	-	-	-	-	-	-	-	-	-	Sten2	-	-	Sten2	Sten2	-		Sten1	Sten1	-	Sten1	Sten2	-	Sten1	Sten1	Sten2	Sten1
Aradu.A02	67418284		Sten1	-	-	Sten1	-	-	-	-	-	-	-	-	-	Sten1	-	Sten1	-	-	Sten1	Sten1	-		-	-	-	-	-	-	-	-	-	-
Aradu.A02	67418357		Sten1	-	-	Sten1	Sten1	Sten1	-	-	-	-	-	-	-	-	-	Sten1	-	-	Sten1	Sten1	-		Sten2	Sten2	Sten1	Sten2	Sten2	Sten1	Sten2	Sten2	Sten2	Sten2
Aradu.A02	67418862		Sten1	-	-	Sten1	-	-	-	-	-	-	-	-	-	-	-	Sten1	-	-	Sten1	Sten1	-		-	-	-	-	-	-	-	-	-	-
Aradu.A02	67418874		Sten2	-	-	Sten2	Sten1	Sten1	-	-	Sten1	-	-	-	-	-	-	Sten2	-	-	Sten2	Sten2	-		Sten1	Sten1	-	Sten1	Sten2	-	Sten1	Sten1	Sten2	Sten1
Aradu.A02	67419937		-	-	-	-	-	-	-	-	-	-	-	-	-	-	-	-	-	-	-	-	-		-	-	-	-	-	-	-	-	-	-
Aradu.A02	67420486		-	-	-	Sten2	Sten1	Sten1	-	-	Sten1	-	-	-	-	-	-	Sten2	-	-	Sten2	Sten2	-		Sten1	Sten1	-	Sten1	Sten2	-	Sten1	Sten1	Sten2	Sten1
Aradu.A02	67420580		Sten1	-	-	Sten1	Sten1	Sten1	-	-	-	-	-	-	-	-	-	Sten1	-	-	Sten1	Sten1	-		Sten2	Sten2	Sten1	Sten2	Sten2	Sten1	Sten2	Sten2	Sten2	-
Aradu.A02	69099226		-	-	-	-	-	-	-	-	Sten1	-	-	-	-	-	-	-	-	-	-	-	-		-	-	-	-	-	-	-	-	-	-
Aradu.A02	73927285		-	-	-	Sten2	-	Sten1	-	-	-	-	-	-	-	-	-	Sten2	-	-	Sten2	Sten2	-		Sten1	Sten1	-	Sten1	Sten2	-	Sten1	Sten1	Sten2	Sten1
Aradu.A02	74475889		-	-	-	-	-	-	-	-	-	-	-	-	-	-	-	-	-	-	-	-	-		-	-	-	-	-	-	-	-	-	-
Aradu.A02	75731986		Sten2	-	-	Sten2	Sten1	Sten1	-	-	-	-	-	-	-	-	-	Sten2	-	-	Sten2	Sten2	-		Sten1	Sten1	-	Sten1	Sten2	-	Sten1	Sten1	Sten2	Sten1
Aradu.A02	78187923		Sten2	-	-	Sten2	Sten1	Sten1	-	-	-	-	-	-	-	-	-	Sten2	-	-	Sten2	Sten2	-		Sten1	Sten1	-	Sten1	Sten2	-	Sten1	Sten1	Sten2	Sten1
Aradu.A02	79027979		-	-	-	-	-	-	-	-	-	-	-	-	-	-	-	-	-	-	-	-	-		-	-	-	-	-	-	-	-	-	-
Aradu.A02	79414030		Sten2	-	-	-	Sten1	Sten1	-	-	Sten1	-	-	-	-	-	-	Sten2	-	-	Sten2	Sten2	-		Sten1	Sten1	-	Sten1	Sten2	-	Sten1	Sten1	Sten2	Sten1
Aradu.A02	80297365		Sten2	-	-	Sten2	Sten1	Sten1	-	-	Sten2	-	-	-	-	-	-	Sten2	-	-	Sten2	Sten2	-		Sten1	Sten1	-	Sten1	Sten2	-	Sten1	Sten1	Sten2	Sten1
Aradu.A02	80730421		Sten2	-	-	Sten2	Sten1	Sten1	-	-	-	-	-	-	-	-	-	Sten2	-	-	Sten2	Sten2	-		Sten1	Sten2	-	Sten1	Sten2	-	Sten1	Sten1	Sten2	Sten1
Aradu.A02	81019015		Sten2	-	-	Sten2	Sten1	Sten1	-	-	Sten1	-	-	-	-	-	-	Sten2	-	-	Sten2	Sten2	-		Sten1	Sten1	-	Sten1	Sten2	-	Sten1	Sten1	-	Sten1
Aradu.A02	81609784		Sten2	-	-	Sten2	Sten1	Sten1	-	-	-	-	-	-	-	-	-	Sten2	-	-	Sten2	Sten2	-		Sten1	Sten1	-	Sten1	Sten2	-	Sten1	Sten1	Sten2	Sten1
Aradu.A02	82726495		Sten2	-	-	Sten2	Sten1	Sten1	-	-	-	-	-	-	-	-	-	Sten2	-	-	Sten2	Sten2	-		Sten1	Sten1	-	Sten1	Sten2	-	Sten1	Sten1	Sten2	Sten1
Aradu.A02	82726525		Sten2	-	-	Sten2	Sten1	Sten1	-	-	-	-	-	-	-	-	-	Sten2	-	-	Sten2	Sten2	-		Sten1	Sten1	-	Sten1	Sten2	-	Sten1	Sten1	Sten2	Sten1
Aradu.A02	82990736		Sten2	-	-	Sten2	Sten1	Sten1	-	-	-	-	-	-	-	-	-	Sten2	-	-	Sten2	Sten2	-		Sten1	Sten1	-	-	Sten2	-	Sten1	Sten1	Sten2	Sten1
Aradu.A02	83464195		Sten2	-	-	Sten2	Sten2	Sten1	-	-	-	-	-	-	-	-	-	Sten2	-	Sten1	Sten2	Sten2	-		Sten1	Sten1	-	Sten1	Sten2	-	Sten1	Sten1	Sten2	Sten1
Aradu.A02	84827010		Sten2	-	-	Sten2	Sten2	Sten1	-	-	Sten1	-	-	-	-	-	-	Sten2	-	Sten1	Sten2	Sten2	-		Sten1	Sten1	-	Sten1	Sten2	-	Sten1	Sten1	Sten2	Sten1
Aradu.A02	84880919		Sten2	-	-	Sten2	Sten2	Sten1	-	-	Sten1	-	-	-	-	-	-	Sten2	-	Sten1	Sten2	Sten2	-		Sten1	Sten1	-	Sten1	Sten2	-	Sten1	Sten1	Sten2	Sten1
Aradu.A02	85209133		Sten2	-	-	Sten2	-	-	-	-	Sten1	-	-	-	-	-	-	Sten2	-	Sten1	Sten2	Sten2	-		Sten1	Sten1	-	Sten1	Sten2	-	Sten1	Sten1	Sten2	Sten1
Aradu.A02	85315365		Sten2	-	-	Sten2	Sten2	Sten1	-	-	Sten1	-	-	-	-	-	-	Sten2	-	Sten1	Sten2	Sten2	-		Sten1	Sten1	-	Sten1	Sten2	-	Sten1	Sten1	Sten2	Sten1
Aradu.A02	85316535		Sten2	-	-	Sten2	Sten2	Sten1	-	-	Sten1	-	-	-	-	-	-	Sten2	-	Sten1	Sten2	Sten2	-		Sten1	Sten1	-	Sten1	Sten2	-	Sten1	Sten1	Sten2	Sten1
Aradu.A02	86069667		Sten2	-	-	Sten2	Sten2	Sten1	-	-	-	-	-	-	-	-	-	Sten2	-	Sten1	Sten1	Sten2	-		Sten1	Sten1	-	Sten1	Sten2	-	Sten1	Sten1	Sten2	Sten1
Aradu.A02	86659682		Sten1	-	-	Sten1	Sten1	-	-	-	Sten1	-	-	-	-	-	-	Sten1	-	-	Sten1	Sten1	-		-	-	-	-	Sten1	-	-	-	Sten1	-
Aradu.A02	87417752		Sten2	-	-	Sten2	Sten2	Sten1	-	-	-	-	-	-	-	-	-	Sten2	-	Sten1	Sten2	Sten2	-		Sten2	Sten1	-	Sten1	Sten2	-	Sten1	Sten1	Sten2	Sten1
Aradu.A02	89078850		Sten2	Sten1	-	Sten2	Sten2	Sten1	Sten1	Sten1	Sten1	Sten2	Sten2	Sten2	Sten2	-	Sten2	Sten2	Sten1	Sten1	Sten2	-	Sten2		Sten2	Sten1	-	Sten1	Sten2	-	Sten1	Sten1	Sten2	Sten1
Aradu.A02	89159922		Sten2	Sten1	-	Sten2	Sten2	Sten1	Sten1	Sten1	Sten1	Sten2	Sten2	Sten2	Sten2	-	Sten2	Sten2	Sten1	Sten1	Sten2	-	Sten2		Sten2	Sten1	-	Sten1	Sten2	-	Sten1	Sten1	Sten2	Sten1
Aradu.A02	90812650		Sten2	Sten1	-	Sten2	Sten2	Sten1	Sten1	Sten1	Sten1	Sten2	Sten2	Sten2	Sten2	-	Sten2	Sten2	Sten1	Sten1	Sten2	-	Sten2		Sten1	Sten2	-	Sten1	-	-	Sten1	Sten1	Sten2	Sten1
Aradu.A02	91638679		Sten2	Sten1	-	Sten2	Sten2	Sten1	Sten1	Sten1	Sten1	Sten2	Sten2	Sten2	Sten2	-	Sten2	Sten2	Sten1	Sten1	Sten2	-	Sten2		Sten1	Sten2	-	Sten1	-	-	Sten1	Sten1	Sten2	Sten1
Aradu.A02	91655615		-	-	-	-	-	-	-	-	-	-	-	-	-	-	-	-	-	-	-	-	-		-	-	-	-	-	-	-	-	-	-
Aradu.A02	92077207		-	-	-	-	-	-	-	-	-	-	-	-	-	-	-	-	-	-	-	-	-		-	-	-	-	-	-	-	-	-	-
Aradu.A02	92317831		-	-	-	-	-	-	-	-	-	-	-	-	-	-	-	-	-	-	-	-	-		-	-	-	-	-	-	-	-	-	-
Aradu.A02	92612264		-	-	-	-	-	-	-	-	-	-	-	-	-	-	-	-	-	-	-	-	-		-	-	-	-	-	-	-	-	-	-
Aradu.A02	92958971		-	-	-	-	-	-	-	-	-	-	-	-	-	-	-	-	-	-	-	-	-		-	-	-	-	-	-	-	-	-	-
Aradu.A02	93790795		-	-	-	-	-	-	-	-	-	-	-	-	-	-	-	-	-	-	-	-	-		-	-	-	-	-	-	-	-	-	-
Aradu.A03	263799		-	-	-	-	-	-	-	-	-	-	-	-	-	-	-	-	-	-	-	-	-		-	-	-	-	-	-	-	-	-	-
Aradu.A03	679404		-	-	-	-	-	-	-	-	-	-	-	-	-	-	-	-	-	-	-	-	-		-	-	-	-	-	-	-	-	-	-
Aradu.A03	1215455		-	-	-	-	-	-	-	-	Sten1	-	-	-	-	-	-	-	-	-	-	-	-		-	-	-	-	-	-	-	-	-	-
Aradu.A03	1816539		-	-	-	-	-	-	-	-	-	-	-	-	-	-	-	-	-	-	-	-	-		-	-	-	-	-	-	-	-	-	-
Aradu.A03	1954749		-	-	-	-	-	-	-	-	-	-	-	-	-	-	-	-	-	-	-	-	-		-	-	-	-	-	-	-	-	-	-
Aradu.A03	1989523		-	-	-	-	-	-	-	-	-	-	-	-	-	-	-	-	-	-	-	-	-		-	-	-	-	-	-	-	-	-	-
Aradu.A03	2018420		-	-	-	-	-	-	-	-	-	-	-	-	-	-	-	-	-	-	-	-	-		-	-	-	-	-	-	-	-	-	-
Aradu.A03	3445290		-	-	-	-	-	-	-	-	-	-	-	-	-	-	-	-	-	-	-	-	-		-	-	-	-	-	-	-	-	-	-
Aradu.A03	3808006		-	-	-	-	-	-	-	-	-	-	-	-	-	-	-	-	-	-	-	-	-		-	-	-	-	-	-	-	-	-	-
Aradu.A03	4763112		-	-	-	-	-	-	-	-	-	-	-	-	-	-	-	-	-	-	-	-	-		-	-	-	-	-	-	-	-	-	-
Aradu.A03	5098297		-	-	-	-	-	-	-	-	-	-	-	-	-	-	-	-	-	-	-	-	-		-	-	-	-	-	-	-	-	-	-
Aradu.A03	6058658		-	-	-	-	-	-	-	-	-	-	-	-	-	-	-	-	-	-	-	-	-		-	-	-	-	-	-	-	-	-	-
Aradu.A03	6247470		-	-	-	-	-	-	-	-	Sten1	-	-	-	-	-	-	-	-	-	-	-	-		-	-	-	-	-	-	-	-	-	-
Aradu.A03	12100920		-	-	-	-	-	-	-	-	-	-	-	-	-	-	-	-	-	-	-	-	-		-	-	-	-	-	-	-	-	-	-
Aradu.A03	12163967		-	-	-	-	-	-	-	-	-	-	-	-	-	-	-	-	-	-	-	-	-		-	-	-	-	-	-	-	-	-	-
Aradu.A03	12860261		-	-	-	-	-	-	-	-	-	-	-	-	-	-	-	-	-	-	-	-	-		-	-	-	-	-	-	-	-	-	-
Aradu.A03	13165005		-	-	-	-	-	-	-	-	-	-	-	-	-	-	-	-	-	-	-	-	-		-	-	-	-	-	-	-	-	-	-
Aradu.A03	19268312		-	-	-	-	-	-	-	-	-	-	-	-	-	-	-	-	-	-	-	-	-		-	-	-	-	-	-	-	-	-	-
Aradu.A03	19856824		-	-	-	-	-	-	-	-	Sten1	-	-	-	-	-	-	-	-	Sten1	-	-	-		-	-	-	-	-	-	-	-	-	-
Aradu.A03	19857137		-	-	-	-	-	-	-	-	Sten1	-	-	-	-	-	-	-	-	Sten1	-	-	-		-	-	-	-	-	-	-	-	-	-
Aradu.A03	20054501		-	-	-	-	-	-	-	-	-	-	-	-	-	-	-	-	-	-	-	-	-		-	-	-	-	-	-	-	-	-	-
Aradu.A03	20811542		-	-	-	-	-	-	-	-	-	-	-	-	-	-	-	-	-	-	-	-	-		-	-	-	-	-	-	-	-	-	-
Aradu.A03	21813574		-	-	-	-	-	-	-	-	-	-	-	-	-	-	-	-	-	-	-	-	-		-	-	-	-	-	-	-	-	-	-
Aradu.A03	22722576		-	-	-	-	-	-	-	-	-	-	-	-	-	-	-	-	-	-	-	-	-		-	-	-	-	-	-	-	-	-	-
Aradu.A03	22782677		-	-	-	-	-	-	-	-	-	-	-	-	-	-	-	-	-	-	-	-	-		-	-	-	-	-	-	-	-	-	-
Aradu.A03	24640457		-	-	-	-	-	-	-	-	-	-	-	-	-	-	-	-	-	-	-	-	-		-	-	-	-	-	-	-	-	-	-
Aradu.A03	27510630		-	-	-	-	-	-	-	-	-	-	-	-	-	-	-	-	-	-	-	-	-		-	-	-	-	-	-	-	-	-	-
Aradu.A03	27813965		-	-	-	-	-	-	-	-	-	-	-	-	-	-	-	-	-	-	-	-	-		-	-	-	-	-	-	-	-	-	-
Aradu.A03	27858345		-	-	-	-	-	-	-	-	-	-	-	-	-	-	-	-	-	-	-	-	-		-	-	-	-	-	-	-	-	-	-
Aradu.A03	28031240		-	-	-	-	-	-	-	-	-	-	-	-	-	-	-	-	-	-	-	-	-		-	-	-	-	-	-	-	-	-	-
Aradu.A03	28985376		-	-	-	-	-	-	-	-	-	-	-	-	-	-	-	-	-	-	-	-	-		-	-	-	-	-	-	-	-	-	-
Aradu.A03	29487939		-	-	-	-	-	-	-	-	-	-	-	-	-	-	-	-	-	Sten1	-	-	-		-	-	-	-	-	-	-	-	-	-
Aradu.A03	29641485		-	-	-	-	-	-	Sten1	-	Sten1	-	-	-	-	-	-	-	-	-	-	-	-		-	-	-	-	-	-	-	-	-	-
Aradu.A03	30066328		-	-	-	-	-	-	-	-	-	-	-	-	-	-	-	-	-	-	-	-	-		-	-	-	-	-	-	-	-	-	-
Aradu.A03	31870379		-	-	-	-	-	-	-	-	-	-	-	-	-	-	-	-	-	-	-	-	-		-	-	-	-	-	-	-	-	-	-
Aradu.A03	33077138		-	-	-	-	-	-	-	-	-	-	-	-	-	-	-	-	-	-	-	-	-		-	-	-	-	-	-	-	-	-	-
Aradu.A03	34011390		Sten1	Sten1	-	Sten1	Sten1	Sten1	Sten1	Sten1	Sten1	Sten1	Sten1	Sten1	Sten1	Sten1	Sten1	Sten1	Sten1	-	-	Sten1	Sten1		Sten2	Sten2	Sten1	Sten2	Sten2	Sten2	Sten2	Sten2	Sten2	Sten2
Aradu.A03	35468284		-	-	-	-	-	-	-	-	-	-	-	-	-	-	-	-	-	-	-	-	-		-	-	-	-	-	-	-	-	-	-
Aradu.A03	38187883		-	-	-	-	-	-	-	-	-	-	-	-	-	-	-	-	-	-	-	-	-		-	-	-	-	-	-	-	-	-	-
Aradu.A03	40250685		-	-	-	-	-	-	-	-	-	-	-	-	-	-	-	-	-	-	-	-	-		-	-	-	-	-	-	-	-	-	-
Aradu.A03	40531384		-	-	-	-	-	-	-	-	-	-	-	-	-	-	-	-	-	-	-	-	-		-	-	-	-	-	-	-	-	-	-
Aradu.A03	42785336		-	-	-	-	-	-	-	-	-	-	-	-	-	-	-	-	-	-	-	-	-		-	-	-	-	-	-	-	-	-	-
Aradu.A03	61827387		-	-	-	-	-	-	-	-	-	-	-	-	-	-	-	-	-	-	-	-	-		-	-	-	-	-	-	-	-	-	-
Aradu.A03	67200396		-	-	-	-	-	-	-	-	-	-	-	-	-	-	-	-	-	Sten1	-	-	-		-	-	-	-	-	-	-	-	-	-
Aradu.A03	71754595		-	-	-	-	-	-	-	-	-	-	-	-	-	-	-	-	-	-	-	-	-		-	-	-	-	-	-	-	-	-	-
Aradu.A03	74451319		-	-	-	-	-	-	-	-	-	-	-	-	-	-	-	-	-	-	-	-	-		-	-	-	-	-	-	-	-	-	-
Aradu.A03	82192471		-	-	-	-	-	-	-	-	-	-	-	-	-	-	-	-	-	-	-	-	-		-	-	-	-	-	-	-	-	-	-
Aradu.A03	85054303		-	-	-	-	-	-	-	-	-	-	-	-	-	-	-	-	-	-	-	-	-		-	-	-	-	-	-	-	-	-	-
Aradu.A03	85255264		-	-	-	-	-	-	-	-	-	-	-	-	-	-	-	-	-	-	-	-	-		-	-	-	-	-	-	-	-	-	-
Aradu.A03	91599139		Sten1	Sten1	-	Sten1	Sten1	Sten1	Sten1	Sten1	-	Sten1	Sten1	Sten1	Sten1	Sten1	Sten1	-	Sten1	-	-	-	Sten1		-	Sten1	-	Sten1	Sten1	Sten1	Sten1	Sten1	Sten1	Sten1
Aradu.A03	94046003		-	-	-	-	-	-	-	-	-	-	-	-	-	-	-	-	-	-	-	-	-		-	-	-	-	-	-	-	-	-	-
Aradu.A03	96285079		-	-	-	-	-	-	-	-	-	-	-	-	-	-	-	-	-	-	-	-	-		-	-	-	-	-	-	-	-	-	-
Aradu.A03	96366712		Sten1	Sten1	Sten1	Sten1	-	Sten1	Sten1	-	-	Sten1	Sten1	Sten1	Sten1	Sten1	Sten1	Sten1	-	Sten1	-	Sten1	Sten1		Sten1	-	-	-	Sten1	-	Sten1	Sten1	-	-
Aradu.A03	100096163		-	-	-	-	-	-	-	-	-	-	-	-	-	-	-	-	-	-	-	-	-		-	-	-	-	-	-	-	-	-	-
Aradu.A03	100932532		-	-	-	-	-	-	-	-	-	-	-	-	-	-	-	-	-	-	-	-	-		-	-	-	-	-	-	-	-	-	-
Aradu.A03	103319854		-	-	-	-	-	-	-	-	-	-	-	-	-	-	-	-	-	-	-	-	-		-	-	-	-	-	-	-	-	-	-
Aradu.A03	105399156		-	-	-	-	-	-	-	-	-	-	-	-	-	-	-	-	-	-	-	-	-		-	-	-	-	-	-	-	-	-	-
Aradu.A03	105428219		-	-	-	-	-	-	-	-	-	-	-	-	-	-	-	-	-	-	-	-	-		-	-	-	-	-	-	-	-	-	-
Aradu.A03	108830624		-	-	-	-	-	-	-	-	-	-	-	-	-	-	-	-	-	-	-	-	-		-	-	-	-	-	-	-	-	-	-
Aradu.A03	110293559		-	-	-	-	-	-	-	-	-	-	-	-	-	-	-	-	-	-	-	-	-		-	-	-	-	-	-	-	-	-	-
Aradu.A03	112869336		-	-	-	-	-	-	-	-	-	-	-	-	-	-	-	-	-	-	-	-	-		-	-	-	-	-	-	-	-	-	-
Aradu.A03	115670557		-	-	-	-	-	-	-	-	-	-	-	-	-	-	-	-	-	-	-	-	-		-	-	-	-	-	-	-	-	-	-
Aradu.A03	117747708		-	-	-	-	-	-	-	-	-	-	-	-	-	-	-	-	-	-	-	-	-		-	-	-	-	-	-	-	-	-	-
Aradu.A03	118006557		-	-	-	-	-	-	-	-	-	-	-	-	-	-	-	-	-	-	-	-	-		-	-	-	-	-	-	-	-	-	-
Aradu.A03	118027452		-	-	-	-	-	-	-	-	-	-	-	-	-	-	-	-	-	-	-	-	-		-	-	-	-	-	-	-	-	-	-
Aradu.A03	118029011		-	-	-	-	-	-	-	-	-	-	-	-	-	-	-	-	-	-	-	-	-		-	-	-	-	-	-	-	-	-	-
Aradu.A03	118410190		-	-	-	-	-	-	-	-	-	-	-	-	-	-	-	-	-	-	-	-	-		-	-	-	-	-	-	-	-	-	-
Aradu.A03	119191245		-	-	-	-	-	-	-	-	-	-	-	-	-	-	-	-	-	-	-	-	-		-	-	-	-	-	-	-	-	-	-
Aradu.A03	119760138		-	-	-	-	-	-	-	-	-	-	-	-	-	-	-	-	-	-	-	-	-		-	-	-	-	-	-	-	-	-	-
Aradu.A03	120779244		-	-	-	-	-	-	-	-	-	-	-	-	-	-	-	-	-	-	-	-	-		-	-	-	-	-	-	-	-	-	-
Aradu.A03	124388226		-	-	-	-	-	-	-	-	-	-	-	-	-	-	-	-	-	-	-	-	-		-	-	-	-	-	-	-	-	-	-
Aradu.A03	124936689		-	-	-	-	-	-	-	-	-	-	-	-	-	-	-	-	-	-	-	-	-		-	-	-	-	-	-	-	-	-	-
Aradu.A03	125668369		-	-	-	-	-	-	-	-	-	-	-	-	-	-	-	-	-	-	-	-	-		-	-	-	-	-	-	-	-	-	-
Aradu.A03	126684767		-	-	-	-	-	-	-	-	-	-	-	-	-	-	-	-	-	-	-	-	-		-	-	-	-	-	-	-	-	-	-
Aradu.A03	127096366		-	-	-	-	-	-	-	-	-	-	-	-	-	-	-	-	-	-	-	-	-		-	-	-	-	-	-	-	-	-	-
Aradu.A03	127285279		-	-	-	-	-	-	-	-	-	-	-	-	-	-	-	-	-	-	-	-	-		-	-	-	-	-	-	-	-	-	-
Aradu.A03	127612693		-	-	-	-	-	-	-	-	-	-	-	-	-	-	-	-	-	-	-	-	-		-	-	-	-	-	-	-	-	-	-
Aradu.A03	127785012		-	-	-	-	-	-	-	-	-	-	-	-	-	-	-	-	-	-	-	-	-		-	-	-	-	-	-	-	-	-	-
Aradu.A03	128169984		-	-	-	-	-	-	-	-	-	-	-	-	-	-	-	-	-	-	-	-	-		-	-	-	-	-	-	-	-	-	-
Aradu.A03	129126195		-	-	-	-	-	-	-	-	-	-	-	-	-	-	-	-	-	-	-	-	-		-	-	-	-	-	-	-	-	-	-
Aradu.A03	129244646		Sten1	Sten1	-	Sten1	Sten1	Sten1	Sten1	Sten1	Sten1	Sten1	Sten1	Sten1	Sten1	Sten1	Sten1	-	Sten1	-	-	Sten1	Sten1		-	-	-	-	-	-	-	-	-	-
Aradu.A03	129649608		-	-	-	-	-	-	-	-	-	-	-	-	-	-	-	-	-	-	-	-	-		-	-	-	-	-	-	-	-	-	-
Aradu.A03	130403989		-	-	-	-	-	-	-	-	-	-	-	-	-	-	-	-	-	-	-	-	-		-	-	-	-	-	-	-	-	-	-
Aradu.A03	130991357		-	-	-	-	-	-	-	-	-	-	-	-	-	-	-	-	-	-	-	-	-		-	-	-	-	-	-	-	-	-	-
Aradu.A03	131460394		-	-	-	-	-	-	-	-	-	-	-	-	-	-	-	-	-	-	-	-	-		-	-	-	-	-	-	-	-	-	-
Aradu.A03	131479751		-	-	-	-	-	-	-	-	-	-	-	-	-	-	-	-	-	-	-	-	-		-	-	-	-	-	-	-	-	-	-
Aradu.A03	131522694		-	-	-	-	-	-	-	-	-	-	-	-	-	-	-	-	-	-	-	-	-		-	-	-	-	-	-	-	-	-	-
Aradu.A03	131858812		-	-	-	-	-	-	-	-	-	-	-	-	-	-	-	-	-	-	-	-	-		-	-	-	-	-	-	-	-	-	-
Aradu.A03	132068349		-	-	-	-	-	-	-	-	-	-	-	-	-	-	-	-	-	Sten1	-	-	-		-	-	-	-	-	-	-	-	-	-
Aradu.A03	132428208		-	-	-	-	-	-	-	-	-	-	-	-	-	-	-	-	-	-	-	-	-		-	-	-	-	-	-	-	-	-	-
Aradu.A03	132505845		-	-	-	-	-	-	-	-	-	-	-	-	-	-	-	-	-	-	-	-	-		-	-	-	-	-	-	-	-	-	-
Aradu.A03	132658592		-	-	-	-	-	-	-	-	-	-	-	-	-	-	-	-	-	-	-	-	-		-	-	-	-	-	-	-	-	-	-
Aradu.A03	133464199		-	-	-	-	-	-	-	-	-	-	-	-	-	-	-	-	-	-	-	-	-		-	-	-	-	-	-	-	-	-	-
Aradu.A03	134115820		-	-	-	-	-	-	-	-	-	-	-	-	-	-	-	-	-	-	-	-	-		-	-	-	-	-	-	-	-	-	-
Aradu.A03	134465142		-	-	-	-	-	-	-	-	-	-	-	-	-	-	-	-	-	-	-	-	-		-	-	-	-	-	-	-	-	-	-
Aradu.A03	134516054		-	-	-	-	-	-	-	-	-	-	-	-	-	-	-	-	-	-	-	-	-		-	-	-	-	-	-	-	-	-	-
Aradu.A03	134818517		-	-	-	-	-	-	-	-	-	-	-	-	-	-	-	-	-	-	-	-	-		-	-	-	-	-	-	-	-	-	-
Aradu.A04	105953		Sten1	Sten1	Sten1	Sten1	Sten1	Sten1	Sten1	Sten1	-	Sten1	Sten1	Sten1	Sten1	Sten1	Sten1	Sten1	Sten1	-	Sten1	Sten1	Sten1		Sten2	Sten1	Sten2	Sten2	-	-	Sten2	Sten2	Sten1	-
Aradu.A04	162912		Sten2	Sten2	Sten2	Sten2	Sten2	Sten2	Sten2	Sten2	Sten1	Sten2	Sten2	Sten2	Sten2	Sten2	Sten2	Sten2	Sten2	Sten1	Sten2	Sten2	Sten2		Sten2	Sten1	Sten2	Sten2	-	-	Sten2	Sten2	Sten1	-
Aradu.A04	186370		Sten2	Sten2	Sten2	Sten2	Sten2	Sten2	Sten2	Sten2	Sten1	Sten2	Sten2	Sten2	Sten2	Sten2	Sten2	Sten2	Sten2	Sten1	Sten2	Sten2	Sten2		Sten2	Sten1	Sten2	Sten2	-	-	Sten2	Sten2	Sten1	-
Aradu.A04	376077		Sten2	Sten2	Sten2	Sten2	Sten2	Sten2	Sten2	Sten2	Sten1	Sten2	Sten2	Sten2	Sten2	Sten2	Sten2	Sten2	Sten2	Sten2	Sten2	Sten2	Sten2		Sten2	Sten1	Sten2	Sten2	-	-	Sten2	Sten2	Sten1	-
Aradu.A04	814313		-	-	-	-	-	-	-	-	-	-	-	-	-	-	-	-	-	-	-	-	-		-	-	-	-	-	-	-	-	-	-
Aradu.A04	841579		Sten2	Sten2	Sten2	Sten2	Sten2	Sten2	Sten2	Sten2	Sten1	Sten2	Sten2	Sten2	Sten2	Sten2	Sten2	Sten2	Sten2	Sten1	Sten2	Sten2	Sten2		Sten2	Sten1	Sten2	Sten2	-	Sten1	Sten2	Sten2	Sten1	-
Aradu.A04	1330996		Sten2	Sten2	Sten2	Sten2	Sten2	Sten2	Sten2	Sten2	Sten1	Sten2	Sten2	Sten2	Sten2	Sten2	Sten2	Sten2	Sten2	Sten1	Sten2	Sten2	Sten2		Sten2	Sten1	Sten1	Sten2	-	Sten1	Sten2	Sten2	Sten1	-
Aradu.A04	1362368		Sten2	Sten2	Sten2	Sten2	Sten2	Sten2	Sten2	Sten2	Sten1	Sten2	Sten2	Sten2	Sten2	Sten2	Sten2	Sten2	Sten2	Sten1	Sten2	Sten2	Sten2		Sten2	Sten1	Sten1	Sten2	-	Sten1	Sten2	Sten2	Sten1	-
Aradu.A04	1428407		Sten2	Sten2	Sten2	Sten2	Sten2	Sten2	Sten2	Sten2	Sten1	Sten2	Sten2	Sten2	Sten2	Sten2	Sten2	Sten2	Sten2	Sten1	Sten2	Sten2	Sten2		Sten2	Sten1	Sten1	Sten2	-	Sten1	Sten2	Sten2	Sten1	-
Aradu.A04	1903375		Sten2	Sten2	Sten2	Sten2	Sten2	Sten2	Sten2	Sten2	Sten1	Sten2	Sten2	Sten2	Sten2	Sten2	Sten2	Sten2	Sten2	Sten1	Sten2	Sten2	Sten2		Sten2	Sten1	Sten1	Sten2	-	Sten1	Sten2	Sten2	Sten1	-
Aradu.A04	2341583		Sten2	Sten2	Sten2	Sten2	Sten2	Sten2	Sten2	Sten2	Sten1	Sten2	Sten2	Sten2	Sten2	Sten2	Sten2	Sten2	Sten2	Sten1	Sten2	Sten2	Sten2		Sten2	Sten1	Sten1	Sten2	-	Sten1	Sten2	Sten2	Sten1	-
Aradu.A04	2755924		Sten2	Sten2	Sten2	Sten2	Sten2	Sten2	Sten2	Sten2	Sten1	Sten2	Sten2	Sten2	Sten2	Sten2	Sten2	Sten2	Sten2	Sten1	Sten2	Sten2	Sten2		Sten2	Sten1	Sten1	Sten2	-	Sten1	Sten2	Sten2	Sten1	-
Aradu.A04	2986913		Sten2	Sten2	Sten2	Sten2	Sten2	Sten2	Sten2	Sten2	Sten1	Sten2	Sten2	Sten2	Sten2	Sten2	Sten2	Sten2	Sten2	Sten1	Sten2	Sten2	Sten2		Sten2	Sten1	Sten1	Sten2	-	Sten1	Sten2	Sten2	Sten1	-
Aradu.A04	3019208		Sten2	Sten2	Sten2	Sten2	Sten2	Sten2	Sten2	Sten2	Sten1	Sten2	Sten2	Sten2	Sten2	Sten2	Sten2	Sten2	Sten2	Sten1	Sten2	Sten2	Sten2		Sten2	Sten1	Sten1	Sten2	-	Sten1	Sten2	Sten2	Sten1	-
Aradu.A04	3517899		Sten2	Sten2	Sten2	Sten2	Sten1	Sten2	Sten2	Sten2	Sten1	Sten2	Sten2	Sten2	Sten2	Sten2	Sten2	Sten2	Sten2	Sten1	Sten2	Sten2	Sten2		Sten2	Sten1	Sten1	Sten2	-	Sten1	Sten2	Sten2	Sten1	-
Aradu.A04	3712941		Sten2	Sten2	Sten2	Sten2	Sten1	Sten2	Sten2	Sten2	Sten1	Sten2	Sten2	Sten2	Sten2	Sten2	Sten2	Sten2	Sten2	Sten1	Sten2	Sten2	Sten2		Sten2	Sten1	Sten1	Sten2	-	Sten1	Sten2	Sten2	Sten1	-
Aradu.A04	4182894		Sten2	Sten2	Sten2	Sten2	-	Sten2	Sten2	Sten2	Sten2	Sten2	Sten2	Sten2	Sten2	Sten2	Sten2	Sten2	Sten2	Sten2	Sten2	Sten2	Sten2		Sten2	Sten1	Sten1	Sten1	-	Sten1	Sten2	-	Sten1	-
Aradu.A04	4216107		Sten2	Sten1	Sten2	Sten2	Sten1	Sten2	Sten2	-	Sten1	Sten2	Sten2	Sten2	Sten2	Sten2	Sten2	Sten2	Sten1	Sten1	-	Sten2	Sten2		Sten2	-	-	-	-	Sten1	Sten2	Sten2	-	-
Aradu.A04	5649484		-	-	-	-	-	-	-	-	-	-	-	-	-	-	-	-	-	-	-	-	-		-	-	-	-	-	-	-	-	-	-
Aradu.A04	5659551		Sten2	Sten1	Sten2	Sten2	Sten1	Sten2	Sten2	-	Sten1	Sten2	Sten2	Sten2	Sten2	Sten2	Sten2	Sten2	Sten1	Sten1	-	Sten2	Sten2		Sten1	-	-	-	-	Sten1	Sten2	Sten2	-	-
Aradu.A04	6680088		Sten2	Sten1	Sten2	Sten2	Sten1	Sten2	Sten2	-	Sten1	Sten2	Sten2	Sten2	Sten2	Sten2	Sten2	Sten2	Sten1	Sten1	-	Sten2	Sten2		Sten2	-	-	-	Sten1	Sten1	Sten1	Sten2	-	-
Aradu.A04	7370876		Sten2	Sten1	Sten2	Sten2	Sten1	Sten2	Sten2	-	Sten1	Sten2	Sten2	Sten2	Sten2	Sten2	Sten2	Sten2	Sten1	Sten1	-	Sten2	Sten2		Sten2	-	-	-	Sten1	Sten1	Sten1	Sten2	-	-
Aradu.A04	10403187		Sten2	Sten1	Sten2	Sten2	Sten1	Sten2	Sten2	-	Sten1	Sten2	Sten2	Sten2	Sten2	Sten2	Sten2	Sten2	Sten1	Sten1	-	Sten2	Sten2		Sten2	-	-	-	Sten1	Sten1	Sten1	Sten2	-	-
Aradu.A04	12230276		Sten2	Sten1	Sten2	Sten2	Sten1	Sten2	Sten2	-	Sten1	Sten2	Sten2	Sten2	Sten2	Sten2	Sten2	Sten2	Sten1	Sten1	-	Sten2	Sten2		-	-	-	-	Sten1	Sten1	Sten1	Sten2	-	-
Aradu.A04	12779729		Sten2	Sten1	Sten2	Sten2	Sten1	-	Sten2	-	Sten1	Sten2	Sten2	Sten2	Sten2	Sten2	Sten2	Sten2	-	Sten1	-	Sten2	Sten2		-	-	-	-	Sten1	Sten1	Sten1	-	-	-
Aradu.A04	13743326		Sten2	Sten1	Sten2	Sten2	Sten1	Sten2	Sten2	-	Sten1	Sten2	Sten2	Sten2	Sten2	Sten2	Sten2	Sten2	Sten1	Sten1	-	Sten2	Sten2		Sten2	-	-	-	Sten1	Sten1	Sten1	Sten2	-	-
Aradu.A04	15704111		Sten2	Sten1	-	Sten2	Sten1	-	Sten2	-	Sten1	-	Sten2	Sten2	-	Sten2	Sten1	Sten2	Sten1	Sten1	-	Sten2	-		-	-	-	-	Sten1	Sten1	Sten1	-	-	-
Aradu.A04	18231560		-	-	-	-	-	-	-	-	-	-	-	-	-	-	-	-	-	-	-	-	-		-	-	-	-	-	-	-	-	-	-
Aradu.A04	18406467		Sten2	Sten1	Sten2	Sten2	Sten1	Sten2	Sten2	-	Sten1	Sten2	Sten2	Sten2	Sten2	Sten2	Sten2	Sten2	Sten1	Sten1	-	Sten2	Sten2		-	-	-	-	Sten1	Sten1	Sten1	Sten2	-	-
Aradu.A04	26018057		Sten2	Sten1	Sten2	Sten2	Sten1	Sten2	Sten2	-	Sten1	Sten2	Sten2	Sten2	Sten2	Sten2	Sten2	Sten2	Sten1	Sten1	-	Sten2	Sten2		Sten1	-	-	-	Sten1	Sten1	Sten1	Sten2	-	-
Aradu.A04	29697050		Sten1	Sten1	Sten1	Sten1	Sten1	Sten1	-	-	Sten1	Sten1	-	Sten1	Sten1	Sten1	Sten1	Sten1	-	Sten1	-	-	Sten1		Sten1	-	-	-	Sten1	Sten1	Sten1	Sten1	-	-
Aradu.A04	29697085		Sten2	Sten1	Sten2	Sten2	Sten1	Sten2	Sten2	-	Sten1	Sten2	Sten2	-	Sten2	Sten2	Sten2	Sten2	Sten1	Sten1	-	Sten2	Sten2		-	-	-	-	Sten1	Sten1	Sten1	Sten2	-	-
Aradu.A04	31201580		Sten2	Sten1	Sten2	Sten2	Sten1	Sten2	Sten2	-	Sten1	Sten2	Sten2	Sten2	Sten2	Sten2	Sten2	Sten2	Sten1	Sten1	-	Sten2	Sten2		Sten2	-	-	-	Sten1	Sten1	Sten1	Sten2	-	-
Aradu.A04	35343227		-	-	-	-	-	-	-	-	-	-	-	-	-	-	-	-	-	-	-	-	-		-	-	-	-	-	-	-	-	-	-
Aradu.A04	39355923		-	-	-	-	-	-	-	-	-	-	-	-	-	-	-	-	-	-	-	-	-		-	-	-	-	-	-	-	-	-	-
Aradu.A04	43910476		Sten2	Sten1	Sten2	Sten2	Sten1	Sten2	Sten2	-	Sten1	Sten2	Sten2	Sten2	Sten2	Sten2	Sten2	Sten2	Sten1	Sten1	-	Sten2	Sten2		Sten2	-	-	-	Sten1	Sten1	Sten1	Sten2	-	-
Aradu.A04	44691344		-	-	-	-	-	-	-	-	-	-	-	-	-	-	-	-	-	-	-	-	-		-	-	-	-	-	-	-	-	-	-
Aradu.A04	45012391		-	-	-	-	-	-	-	-	-	-	-	-	-	-	-	-	-	-	-	-	-		-	-	-	-	-	-	-	-	-	-
Aradu.A04	46297588		Sten1	Sten1	Sten1	Sten1	Sten1	Sten1	Sten1	-	Sten1	Sten1	Sten1	Sten1	Sten1	Sten1	Sten1	Sten1	Sten1	Sten1	-	Sten1	Sten1		Sten2	-	-	-	Sten1	Sten1	Sten1	Sten2	-	-
Aradu.A04	50533675		-	-	-	-	-	-	-	-	-	-	-	-	-	-	-	-	-	-	-	-	-		-	-	-	-	-	-	-	-	-	-
Aradu.A04	53185121		Sten2	Sten1	Sten2	Sten2	Sten1	Sten2	Sten2	-	Sten1	Sten2	Sten2	Sten2	Sten2	Sten2	Sten2	Sten2	Sten1	Sten1	-	Sten2	Sten2		Sten2	-	-	-	Sten1	Sten1	Sten1	Sten2	-	-
Aradu.A04	61632456		Sten2	Sten1	Sten2	Sten2	Sten1	Sten2	Sten2	-	Sten1	Sten2	Sten2	Sten2	Sten2	Sten2	Sten2	Sten2	Sten1	Sten2	-	Sten2	Sten2		-	-	-	-	Sten1	Sten1	Sten1	Sten2	-	-
Aradu.A04	61990112		-	-	-	-	-	-	-	-	-	-	-	-	-	-	-	-	-	-	-	-	-		-	-	-	-	-	-	-	-	-	-
Aradu.A04	62753825		Sten2	Sten1	Sten2	Sten2	Sten1	Sten2	Sten2	-	Sten1	Sten2	Sten2	Sten2	Sten2	Sten2	Sten2	Sten2	Sten1	Sten1	-	Sten2	Sten2		Sten2	-	-	-	Sten1	Sten1	Sten1	Sten2	-	-
Aradu.A04	71833835		Sten2	Sten1	Sten2	Sten2	Sten1	Sten2	Sten2	-	Sten1	Sten2	Sten2	Sten2	Sten2	Sten2	Sten2	Sten2	Sten1	Sten1	-	Sten2	Sten2		Sten2	-	-	-	Sten1	Sten1	Sten1	Sten2	-	-
Aradu.A04	72118706		-	Sten1	Sten2	Sten2	Sten1	Sten2	Sten2	-	Sten1	Sten2	Sten2	Sten2	Sten2	Sten2	Sten2	-	Sten1	Sten1	-	Sten2	Sten2		Sten2	-	-	-	Sten1	Sten1	Sten1	Sten2	-	-
Aradu.A04	76565873		Sten2	Sten1	Sten2	Sten2	Sten1	Sten2	Sten2	-	Sten1	Sten2	Sten2	Sten2	Sten2	Sten2	Sten2	Sten2	Sten1	Sten1	-	Sten2	Sten2		Sten2	-	-	-	Sten1	Sten1	Sten1	Sten2	-	-
Aradu.A04	78282956		-	-	-	-	-	-	-	-	-	-	-	-	-	-	-	-	-	-	-	-	-		-	-	-	-	-	-	-	-	-	-
Aradu.A04	80024591		Sten2	Sten1	Sten2	Sten2	Sten1	Sten2	Sten2	-	Sten1	Sten2	Sten2	Sten2	Sten2	Sten2	Sten2	Sten2	Sten2	Sten1	-	Sten2	Sten2		-	-	-	-	Sten1	Sten1	Sten1	Sten2	-	-
Aradu.A04	82482114		-	-	-	-	-	-	-	-	-	-	-	-	-	-	-	-	-	-	-	-	-		-	-	-	-	-	-	-	-	-	-
Aradu.A04	85249177		Sten2	Sten1	Sten2	Sten2	Sten1	Sten2	Sten2	-	Sten1	Sten2	Sten2	Sten2	Sten2	Sten2	Sten2	Sten2	Sten1	Sten1	-	Sten2	Sten2		Sten1	-	-	-	Sten1	Sten1	Sten1	Sten2	-	-
Aradu.A04	88047543		Sten2	Sten1	Sten2	Sten2	Sten1	Sten2	Sten2	-	Sten1	Sten2	Sten2	Sten2	Sten2	Sten2	Sten2	Sten2	Sten1	Sten1	-	Sten2	Sten2		Sten2	-	-	-	Sten1	Sten1	Sten1	Sten2	-	-
Aradu.A04	89924581		Sten2	Sten1	Sten2	Sten2	Sten1	Sten2	Sten2	-	Sten1	Sten2	Sten2	Sten2	-	Sten2	Sten2	Sten2	Sten1	Sten1	-	Sten2	Sten2		Sten1	-	-	-	Sten1	Sten1	Sten1	-	-	-
Aradu.A04	90141686		-	-	-	-	-	-	-	-	-	-	-	-	-	-	-	-	-	-	-	-	-		-	-	-	-	-	-	-	-	-	-
Aradu.A04	91804337		Sten2	Sten1	Sten2	Sten2	Sten1	Sten2	Sten2	-	Sten1	Sten2	Sten2	Sten2	Sten2	Sten2	Sten2	Sten2	Sten1	Sten1	-	Sten2	Sten2		-	-	-	-	Sten1	Sten1	Sten1	Sten2	-	-
Aradu.A04	92635030		Sten2	Sten1	Sten2	Sten2	Sten1	Sten2	Sten2	-	Sten1	Sten2	Sten2	Sten2	Sten2	Sten2	Sten2	Sten2	Sten1	Sten1	-	Sten2	Sten2		-	-	-	-	Sten1	Sten1	Sten1	Sten2	-	-
Aradu.A04	92696031		Sten2	Sten1	Sten2	Sten2	Sten1	Sten2	Sten2	-	Sten1	Sten2	Sten2	Sten2	Sten2	Sten2	Sten2	Sten2	Sten1	Sten1	-	Sten2	Sten2		Sten2	-	-	-	Sten1	Sten1	Sten1	Sten2	-	-
Aradu.A04	95000363		Sten2	Sten1	Sten2	Sten2	Sten1	Sten2	Sten2	-	Sten1	Sten2	Sten2	Sten2	Sten2	Sten2	Sten2	Sten2	Sten1	Sten1	-	Sten2	Sten2		Sten2	-	-	-	Sten1	Sten1	Sten1	Sten2	-	-
Aradu.A04	103831183		Sten1	Sten1	Sten1	Sten1	Sten1	Sten1	Sten1	-	Sten1	Sten1	Sten1	Sten1	Sten1	Sten1	Sten1	Sten1	Sten1	Sten1	-	Sten1	Sten1		Sten1	-	-	-	Sten1	Sten1	Sten1	Sten1	-	-
Aradu.A04	103964432		Sten2	Sten1	Sten2	Sten2	Sten1	Sten2	Sten2	-	Sten1	Sten2	Sten2	Sten2	Sten2	Sten2	Sten2	Sten2	Sten1	Sten1	-	Sten2	Sten2		-	-	-	-	Sten1	Sten1	Sten1	Sten2	-	-
Aradu.A04	104172441		Sten2	Sten1	Sten2	Sten2	Sten1	Sten2	Sten2	-	Sten1	Sten2	Sten2	Sten2	Sten2	Sten2	Sten2	Sten2	Sten1	Sten1	-	Sten2	Sten2		Sten1	-	-	-	Sten1	Sten1	Sten1	Sten2	-	-
Aradu.A04	105896594		Sten1	-	Sten1	Sten1	-	Sten1	Sten1	-	-	Sten1	Sten1	Sten1	Sten1	Sten1	Sten1	Sten1	-	-	-	Sten1	Sten1		-	-	-	-	-	-	-	Sten1	-	-
Aradu.A04	107069698		-	-	-	-	-	-	-	-	-	-	-	-	-	-	-	-	-	-	-	-	-		-	-	-	-	-	-	-	-	-	-
Aradu.A04	108230713		Sten2	Sten1	Sten2	Sten2	Sten1	Sten2	Sten2	-	Sten1	Sten2	Sten2	Sten2	Sten2	Sten2	Sten2	Sten2	Sten1	Sten1	-	Sten2	Sten2		-	-	-	-	Sten1	Sten1	Sten1	Sten2	-	-
Aradu.A04	110684871		Sten2	Sten1	Sten2	Sten2	Sten1	Sten2	Sten2	-	Sten1	Sten2	Sten2	Sten2	Sten2	Sten2	Sten2	Sten2	Sten1	Sten1	-	Sten2	Sten2		-	-	-	-	Sten1	Sten1	Sten1	Sten2	-	-
Aradu.A04	111718457		Sten1	Sten1	Sten1	Sten1	Sten1	Sten1	Sten1	-	Sten1	Sten1	Sten1	Sten1	Sten1	Sten1	Sten1	Sten1	Sten1	Sten1	-	Sten1	Sten1		Sten2	-	-	-	Sten1	-	Sten1	Sten1	-	-
Aradu.A04	112403290		Sten2	Sten1	Sten2	Sten2	Sten1	Sten2	Sten2	-	Sten1	Sten2	Sten2	Sten2	Sten2	Sten2	Sten2	Sten2	Sten1	Sten1	-	Sten2	Sten2		Sten2	-	-	-	Sten1	Sten1	Sten1	Sten2	-	-
Aradu.A04	112468907		Sten2	Sten1	Sten2	Sten2	Sten1	Sten2	Sten2	-	Sten1	Sten2	Sten2	Sten2	Sten2	Sten2	Sten2	Sten2	Sten1	Sten1	-	Sten2	Sten2		Sten2	-	-	-	Sten1	Sten1	Sten1	Sten2	-	-
Aradu.A04	112877017		Sten2	Sten1	Sten2	Sten2	Sten1	Sten2	Sten2	-	Sten1	Sten2	Sten2	Sten2	Sten2	Sten2	Sten2	Sten2	Sten1	Sten1	-	Sten2	Sten2		-	-	-	-	Sten1	Sten1	Sten1	Sten2	-	-
Aradu.A04	113653210		Sten2	Sten1	Sten2	Sten2	Sten1	Sten2	Sten2	-	Sten1	Sten2	Sten2	Sten2	Sten2	Sten2	Sten2	Sten2	Sten1	Sten1	-	Sten2	Sten2		Sten2	-	-	-	Sten1	Sten1	Sten1	Sten2	-	-
Aradu.A04	114359220		Sten2	Sten1	Sten2	Sten2	Sten1	Sten2	Sten2	-	Sten1	Sten2	Sten2	Sten2	Sten2	Sten2	Sten2	Sten2	Sten1	-	-	Sten2	Sten2		-	-	-	-	Sten1	Sten1	Sten1	Sten2	-	-
Aradu.A04	115830024		-	-	-	-	-	-	-	-	-	-	-	-	-	-	-	-	-	-	-	-	-		-	-	-	-	-	-	-	-	-	-
Aradu.A04	116352006		-	-	-	-	-	-	-	-	-	-	-	-	-	-	-	-	-	-	-	-	-		-	-	-	-	-	-	-	-	-	-
Aradu.A04	118778510		-	-	-	-	-	-	-	-	-	-	-	-	-	-	-	-	-	-	-	-	-		-	-	-	-	-	-	-	-	-	-
Aradu.A04	118822674		-	-	-	-	-	-	-	-	-	-	-	-	-	-	-	-	-	-	-	-	-		-	-	-	-	-	-	-	-	-	-
Aradu.A04	119011071		-	-	-	-	-	-	-	-	-	-	-	-	-	-	-	-	-	-	-	-	-		-	-	-	-	-	-	-	-	-	-
Aradu.A04	119664996		-	-	-	-	-	-	-	-	-	-	-	-	-	-	-	-	-	-	-	-	-		-	-	-	-	-	-	-	-	-	-
Aradu.A04	119691567		-	-	-	-	-	-	-	-	-	-	-	-	-	-	-	-	-	-	-	-	-		-	-	-	-	-	-	-	-	-	-
Aradu.A04	120555571		-	-	-	-	-	-	-	-	-	-	-	-	-	-	-	-	-	Sten1	-	-	-		-	-	-	-	-	-	-	-	-	-
Aradu.A04	120669932		-	-	-	-	-	-	-	-	-	-	-	-	-	-	-	-	-	-	-	-	-		-	-	-	-	-	-	-	-	-	-
Aradu.A04	120783536		-	-	-	-	-	-	-	-	-	-	-	-	-	-	-	-	-	-	-	-	-		-	-	-	-	-	-	-	-	-	-
Aradu.A04	121133496		-	-	-	-	-	-	-	-	-	-	-	-	-	-	-	-	-	-	-	-	-		-	-	-	-	-	-	-	-	-	-
Aradu.A04	122540803		-	-	-	-	-	-	-	-	-	-	-	-	-	-	-	-	-	-	-	-	-		-	-	-	-	-	-	-	-	-	-
Aradu.A05	343193		-	-	-	-	-	-	-	-	-	-	-	-	-	-	-	-	-	-	-	-	-		-	-	-	-	-	-	-	-	-	-
Aradu.A05	1500438		-	-	-	-	-	-	-	-	-	-	-	-	-	-	-	-	-	-	-	-	-		-	-	-	-	-	-	-	-	-	-
Aradu.A05	2776748		-	-	-	-	-	-	-	-	-	-	-	-	-	-	-	-	-	-	-	-	-		-	-	-	-	-	-	-	-	-	-
Aradu.A05	2859361		-	-	-	-	-	-	-	-	-	-	-	-	-	-	-	-	-	-	-	-	-		-	-	-	-	-	-	-	-	-	-
Aradu.A05	3079338		-	-	-	-	-	-	-	-	-	-	-	-	-	-	-	-	-	-	-	-	-		-	-	-	-	-	-	-	-	-	-
Aradu.A05	3141021		-	-	-	-	-	-	-	-	-	-	-	-	-	-	-	-	-	-	-	-	-		-	-	-	-	-	-	-	-	-	-
Aradu.A05	4294221		-	-	-	-	-	-	-	-	-	-	-	-	-	-	-	-	-	-	-	-	-		-	-	-	-	-	-	-	-	-	-
Aradu.A05	4536726		-	-	-	-	-	-	-	-	-	-	-	-	-	-	-	-	-	-	-	-	-		-	-	-	-	-	-	-	-	-	-
Aradu.A05	5435309		-	-	-	-	-	-	-	-	-	-	-	-	-	Sten1	-	-	-	-	-	-	-		-	-	-	-	-	-	-	-	-	-
Aradu.A05	5669888		-	-	-	-	-	-	-	-	-	-	-	-	-	-	-	-	-	-	-	-	-		-	-	-	-	-	-	-	-	-	-
Aradu.A05	5802583		-	-	-	-	-	-	-	-	-	-	-	-	-	-	-	-	-	-	-	-	-		-	-	-	-	-	-	-	-	-	-
Aradu.A05	6930207		-	-	-	-	-	-	-	-	-	-	-	-	-	-	-	-	-	-	-	-	-		-	-	-	-	-	-	-	-	-	-
Aradu.A05	7294750		-	-	-	-	-	-	-	-	-	-	-	-	-	-	-	-	-	-	-	-	-		-	-	-	-	-	-	-	-	-	-
Aradu.A05	7391321		-	-	-	-	-	-	-	-	Sten1	-	-	-	-	-	-	-	-	Sten1	-	-	-		-	-	-	-	-	-	-	-	-	-
Aradu.A05	7804927		-	-	-	-	-	-	-	-	Sten1	-	-	-	-	-	-	-	-	Sten1	-	-	-		-	-	-	-	-	-	-	-	-	-
Aradu.A05	7958564		-	-	-	-	-	-	-	-	-	-	-	-	-	-	-	-	-	-	-	-	-		-	-	-	-	-	-	-	-	-	-
Aradu.A05	8422937		-	-	-	-	-	-	-	-	-	-	-	-	-	-	-	-	-	-	-	-	-		-	-	-	-	-	-	-	-	-	-
Aradu.A05	8621849		-	-	-	-	-	-	-	-	-	-	-	-	-	-	-	-	-	-	-	-	-		-	-	-	-	-	-	-	-	-	-
Aradu.A05	9401169		-	-	-	-	-	-	-	-	-	-	-	-	-	-	-	-	-	-	-	-	-		-	-	-	-	-	-	-	-	-	-
Aradu.A05	10913462		Sten1	Sten1	-	Sten1	Sten1	Sten1	Sten1	Sten1	Sten1	Sten1	Sten1	Sten1	Sten1	Sten1	Sten1	Sten1	Sten1	Sten1	-	-	Sten1		-	-	-	-	-	-	-	-	-	-
Aradu.A05	10961901		-	-	-	-	-	-	-	-	-	-	-	-	-	-	-	-	-	-	-	-	-		-	-	-	-	-	-	-	-	-	-
Aradu.A05	11250415		-	-	-	-	-	-	-	-	-	-	-	-	-	-	-	-	-	-	-	-	-		-	-	-	-	-	-	-	-	-	-
Aradu.A05	11851959		-	-	-	-	-	-	-	-	-	-	-	-	-	-	-	-	-	-	-	-	-		-	-	-	-	-	-	-	-	-	-
Aradu.A05	13259270		-	-	-	-	-	-	-	-	-	-	-	-	-	-	-	-	-	-	-	-	-		-	-	-	-	-	-	-	-	-	-
Aradu.A05	13672610		-	-	-	-	-	-	-	-	-	-	-	-	-	-	-	-	-	-	-	-	-		-	-	-	-	-	-	-	-	-	-
Aradu.A05	14263497		-	-	-	-	-	-	-	-	-	-	-	-	-	-	-	-	-	-	-	-	-		-	-	-	-	-	-	-	-	-	-
Aradu.A05	16078954		-	-	-	-	-	-	-	-	-	-	-	-	-	-	-	-	-	-	-	-	-		-	-	-	-	-	-	-	-	-	-
Aradu.A05	17231044		-	-	-	-	-	-	-	-	-	-	-	-	-	-	-	-	-	-	-	-	-		-	-	-	-	-	-	-	-	-	-
Aradu.A05	17232224		-	-	-	-	-	-	-	-	-	-	-	-	-	-	-	-	-	-	-	-	-		-	-	-	-	-	-	-	-	-	-
Aradu.A05	17514990		-	-	-	-	-	-	-	-	-	-	-	-	-	-	-	-	-	Sten1	-	-	-		-	-	-	-	-	-	-	-	-	-
Aradu.A05	18621181		-	-	-	-	-	-	-	-	-	-	-	-	-	-	-	-	-	-	-	-	-		-	-	-	-	-	-	-	-	-	-
Aradu.A05	20099592		-	-	-	-	-	-	-	-	-	-	-	-	-	-	-	-	-	-	-	-	-		-	-	-	-	-	-	-	-	-	-
Aradu.A05	20650119		-	-	-	-	-	-	-	-	Sten1	-	-	-	-	-	-	-	-	Sten1	-	-	-		-	-	-	-	-	-	-	-	-	-
Aradu.A05	21986891		-	-	-	-	-	-	-	-	-	-	-	-	-	-	-	-	-	-	-	-	-		-	-	-	-	-	-	-	-	-	-
Aradu.A05	23757186		-	-	-	-	-	-	-	-	-	-	-	-	-	-	-	-	-	-	-	-	-		-	-	-	-	-	-	-	-	-	-
Aradu.A05	25031453		-	-	-	-	-	-	-	-	-	-	-	-	-	-	-	-	-	-	-	-	-		-	-	-	-	-	-	-	-	-	-
Aradu.A05	25117467		-	-	-	-	-	-	-	-	-	-	-	-	-	-	-	-	-	-	-	-	-		-	-	-	-	-	-	-	-	-	-
Aradu.A05	27359344		-	-	-	-	-	-	-	-	Sten1	-	-	-	-	-	-	-	-	Sten1	-	-	-		-	-	-	-	-	-	-	-	-	-
Aradu.A05	31727216		-	-	-	-	-	-	-	-	-	-	-	-	-	-	-	-	-	-	-	-	-		-	-	-	-	-	-	-	-	-	-
Aradu.A05	32342436		-	-	-	-	-	-	-	-	-	-	-	-	-	-	-	-	-	-	-	-	-		-	-	-	-	-	-	-	-	-	-
Aradu.A05	34031968		-	-	-	-	-	-	-	-	-	-	-	-	-	-	-	-	-	-	-	-	-		-	-	-	-	-	-	-	-	-	-
Aradu.A05	36717551		-	-	-	-	-	-	-	-	-	-	-	-	-	-	-	-	-	-	-	-	-		-	-	-	-	-	-	-	-	-	-
Aradu.A05	36976387		-	-	-	-	-	-	-	-	-	-	-	-	-	-	-	-	-	-	-	-	-		-	-	-	-	-	-	-	-	-	-
Aradu.A05	36977191		-	-	-	-	-	-	-	-	-	-	-	-	-	-	-	-	-	-	-	-	-		-	-	-	-	-	-	-	-	-	-
Aradu.A05	40506247		-	-	-	-	-	-	-	-	-	-	-	-	-	-	-	-	-	-	-	-	-		-	-	-	-	-	-	-	-	-	-
Aradu.A05	42556912		-	-	-	-	-	-	-	-	-	-	-	-	-	-	-	-	-	-	-	-	-		-	-	-	-	-	-	-	-	-	-
Aradu.A05	43000265		-	-	-	-	-	-	-	-	-	-	-	-	-	-	-	-	-	-	-	-	-		-	-	-	-	-	-	-	-	-	-
Aradu.A05	43002251		-	-	-	-	-	-	-	-	Sten1	-	-	-	-	-	-	-	-	Sten1	-	-	-		-	-	-	-	-	-	-	-	-	-
Aradu.A05	50529881		-	-	-	-	-	-	-	-	-	-	-	-	-	-	-	-	-	-	-	-	-		-	-	-	-	-	-	-	-	-	-
Aradu.A05	50577511		-	-	-	-	-	-	-	-	-	-	-	-	-	-	-	-	-	-	-	-	-		-	-	-	-	-	-	-	-	-	-
Aradu.A05	54227310		-	-	-	-	-	-	-	-	-	-	-	-	-	-	-	-	-	-	-	-	-		-	-	-	-	-	-	-	-	-	-
Aradu.A05	67889391		-	-	-	-	-	-	-	-	-	-	-	-	-	-	-	-	-	-	-	-	-		-	-	-	-	-	-	-	-	-	-
Aradu.A05	68572608		-	-	-	-	-	-	-	-	-	-	-	-	-	-	-	-	-	-	-	-	-		-	-	-	-	-	-	-	-	-	-
Aradu.A05	73887426		-	-	-	-	-	-	-	-	-	-	-	-	-	-	-	-	-	-	-	-	-		-	-	-	-	-	-	-	-	-	-
Aradu.A05	84661588		-	-	-	-	-	-	-	-	-	-	-	-	-	-	-	-	-	-	-	-	-		-	-	-	-	-	-	-	-	-	-
Aradu.A05	86020672		-	-	-	-	-	-	-	-	-	-	-	-	-	-	-	-	-	-	-	-	-		-	-	-	-	-	-	-	-	-	-
Aradu.A05	86591426		-	-	-	-	-	-	-	-	-	-	-	-	-	-	-	-	-	-	-	-	-		-	-	-	-	-	-	-	-	-	-
Aradu.A05	86654618		-	-	-	-	-	-	-	-	-	-	-	-	-	-	-	-	-	-	-	-	-		-	-	-	-	-	-	-	-	-	-
Aradu.A05	86735502		-	-	-	-	-	-	-	-	-	-	-	-	-	-	-	-	-	-	-	-	-		-	-	-	-	-	-	-	-	-	-
Aradu.A05	87492314		-	-	-	-	-	-	-	-	-	-	-	-	-	-	-	-	-	-	-	-	-		-	-	-	-	-	-	-	-	-	-
Aradu.A05	88657518		-	-	-	-	-	-	-	-	-	-	-	-	-	-	-	-	-	-	-	-	-		-	-	-	-	-	-	-	-	-	-
Aradu.A05	88665268		-	-	-	-	-	-	-	-	-	-	-	-	-	-	-	-	-	-	-	-	-		-	-	-	-	-	-	-	-	-	-
Aradu.A05	91845257		-	-	-	-	-	-	-	-	-	-	-	-	-	-	-	-	-	-	-	-	-		-	-	-	-	-	-	-	-	-	-
Aradu.A05	92835506		-	-	-	-	-	-	-	-	-	-	-	-	-	-	-	-	-	-	-	-	-		-	-	-	-	-	-	-	-	-	-
Aradu.A05	93958482		-	-	-	-	-	-	-	-	-	-	-	-	-	-	-	-	-	-	-	-	-		-	-	-	-	-	-	-	-	-	-
Aradu.A05	96432005		-	-	-	-	-	-	-	-	-	-	-	-	-	-	-	-	-	-	-	-	-		-	-	-	-	-	-	-	-	-	-
Aradu.A05	97045943		-	-	-	-	-	-	-	-	-	-	-	-	-	-	-	-	-	-	-	-	-		-	-	-	-	-	-	-	-	-	-
Aradu.A05	100844336		-	-	-	-	-	-	-	-	-	-	-	-	-	-	-	-	-	-	-	-	-		-	-	-	-	-	-	-	-	-	-
Aradu.A05	100941646		Sten1	Sten1	Sten1	Sten1	Sten1	Sten1	Sten1	Sten1	Sten1	Sten1	Sten1	Sten1	Sten1	Sten1	Sten1	Sten1	Sten1	Sten1	Sten1	Sten1	Sten1		-	-	-	-	-	-	-	-	-	-
Aradu.A05	101084410		-	-	-	-	-	-	-	-	-	-	-	-	-	-	-	-	-	-	-	-	-		-	-	-	-	-	-	-	-	-	-
Aradu.A05	102045942		-	-	-	-	-	-	-	-	-	-	-	-	-	-	-	-	-	-	-	-	-		-	-	-	-	-	-	-	-	-	-
Aradu.A05	102825889		-	-	-	-	-	-	-	-	-	-	-	-	-	-	-	-	-	-	-	-	-		-	-	-	-	-	-	-	-	-	-
Aradu.A05	103357781		-	-	-	-	-	-	-	-	Sten1	-	-	-	-	-	-	-	-	Sten1	-	-	-		-	-	-	-	-	-	-	-	-	-
Aradu.A05	104206477		-	-	-	-	-	-	-	-	-	-	-	-	-	-	-	-	-	-	-	-	-		-	-	-	-	-	-	-	-	-	-
Aradu.A05	104421908		-	-	-	-	-	-	-	-	-	-	-	-	-	-	-	-	-	-	-	-	-		-	-	-	-	-	-	-	-	-	-
Aradu.A05	104743468		-	-	-	-	-	-	-	-	-	-	-	-	-	-	-	-	-	-	-	-	-		-	-	-	-	-	-	-	-	-	-
Aradu.A05	108571171		-	-	-	-	-	-	-	-	-	-	-	-	-	-	-	-	-	-	-	-	-		-	-	-	-	-	-	-	-	-	-
Aradu.A05	108709502		-	-	-	-	-	-	-	-	-	-	-	-	-	-	-	-	-	-	-	-	-		-	-	-	-	-	-	-	-	-	-
Aradu.A05	109698643		-	-	-	-	-	-	-	-	-	-	-	-	-	-	-	-	-	-	-	-	-		-	-	-	-	-	-	-	-	-	-
Aradu.A06	259934		-	-	-	-	-	-	-	-	-	-	-	-	-	-	-	-	-	-	-	-	-		-	-	-	-	-	-	-	-	-	-
Aradu.A06	267745		-	-	-	-	-	-	-	-	-	-	-	-	-	-	-	-	-	Sten1	-	-	-		-	-	-	-	-	-	-	-	-	-
Aradu.A06	517702		-	-	-	-	-	-	-	-	-	-	-	-	-	-	-	-	-	-	-	-	-		-	-	-	-	-	-	-	-	-	-
Aradu.A06	1049890		-	-	-	-	-	-	-	-	-	-	-	-	-	-	-	-	-	-	-	-	-		-	-	-	-	-	-	-	-	-	-
Aradu.A06	1222129		-	-	-	-	-	-	-	-	-	-	-	-	-	-	-	-	-	-	-	-	-		-	-	-	-	-	-	-	-	-	-
Aradu.A06	1685871		-	-	-	-	-	-	-	-	-	-	-	-	-	-	-	-	-	-	-	-	-		-	-	-	-	-	-	-	-	-	-
Aradu.A06	1978202		-	-	-	-	-	-	-	-	-	-	-	-	-	-	-	-	-	-	-	-	-		-	-	-	-	-	-	-	-	-	-
Aradu.A06	2034371		-	-	-	-	-	-	-	-	-	-	-	-	-	-	-	-	-	-	-	-	-		-	-	-	-	-	-	-	-	-	-
Aradu.A06	2371320		-	-	-	-	-	-	-	-	-	-	-	-	-	-	-	-	-	-	-	-	-		-	-	-	-	-	-	-	-	-	-
Aradu.A06	2375139		-	-	-	-	-	-	-	-	-	-	-	-	-	-	-	-	-	-	-	-	-		-	-	-	-	-	-	-	-	-	-
Aradu.A06	2747003		Sten2	Sten2	-	Sten2	Sten2	Sten2	Sten2	Sten2	Sten1	Sten2	Sten2	Sten2	Sten2	Sten2	Sten2	Sten1	Sten2	Sten1	-	Sten1	Sten2		Sten1	Sten1	Sten1	Sten1	Sten2	Sten1	Sten2	Sten1	Sten2	Sten1
Aradu.A06	2863952		Sten2	Sten2	-	Sten2	Sten2	Sten2	Sten2	Sten2	Sten1	Sten2	Sten2	Sten2	Sten2	Sten2	Sten2	Sten2	Sten2	Sten1	-	Sten2	Sten2		Sten1	Sten1	Sten1	Sten1	Sten1	Sten1	Sten2	Sten1	Sten2	Sten1
Aradu.A06	2915219		Sten2	Sten2	-	Sten2	Sten2	Sten2	Sten2	Sten2	Sten1	Sten2	Sten2	Sten2	Sten2	Sten2	Sten2	Sten1	Sten2	Sten1	-	Sten1	Sten2		Sten1	Sten1	Sten1	Sten1	Sten2	Sten1	Sten2	Sten1	Sten2	Sten1
Aradu.A06	3474367		Sten2	Sten2	-	Sten2	Sten2	Sten2	Sten2	Sten2	Sten1	Sten2	Sten2	Sten2	Sten2	Sten2	Sten2	Sten1	Sten2	-	-	Sten1	Sten2		-	Sten1	Sten1	Sten1	Sten2	Sten1	Sten2	Sten1	Sten2	Sten1
Aradu.A06	4261015		Sten2	Sten2	-	Sten2	Sten2	Sten2	Sten2	Sten2	Sten1	Sten2	Sten2	Sten2	Sten2	Sten2	Sten2	Sten1	Sten2	Sten1	-	Sten1	Sten2		-	Sten1	Sten1	Sten1	Sten2	Sten1	Sten2	Sten1	Sten2	Sten1
Aradu.A06	4280783		Sten2	Sten2	-	Sten2	Sten2	Sten2	Sten2	Sten2	Sten1	Sten2	Sten2	Sten2	Sten2	Sten2	Sten2	Sten1	Sten2	Sten1	-	Sten1	Sten2		-	Sten1	Sten1	Sten1	Sten2	Sten1	Sten2	Sten1	Sten2	Sten1
Aradu.A06	4687980		Sten2	Sten2	-	Sten1	Sten1	Sten2	Sten2	Sten2	Sten1	Sten2	Sten2	Sten2	Sten2	Sten1	Sten2	Sten2	Sten2	Sten1	-	Sten2	Sten2		Sten1	-	Sten1	-	Sten2	-	-	Sten1	-	-
Aradu.A06	5405523		Sten2	Sten2	-	Sten2	Sten2	Sten2	Sten2	Sten2	Sten1	Sten2	Sten2	Sten2	Sten2	Sten2	Sten2	Sten2	Sten2	Sten1	-	Sten1	Sten2		-	Sten1	Sten1	Sten1	Sten2	Sten1	Sten2	Sten1	Sten2	Sten1
Aradu.A06	5411401		Sten2	Sten2	-	Sten2	Sten2	Sten2	Sten2	Sten2	Sten1	Sten2	Sten2	Sten2	Sten2	Sten2	Sten2	Sten1	Sten2	Sten1	-	Sten1	Sten2		-	Sten1	Sten1	Sten1	Sten2	Sten1	Sten2	Sten1	Sten2	Sten1
Aradu.A06	5789236		Sten2	Sten2	-	Sten2	Sten2	Sten2	Sten2	Sten2	Sten1	Sten2	Sten2	Sten2	Sten2	Sten2	Sten2	Sten1	Sten2	Sten1	-	Sten1	Sten2		-	Sten1	Sten1	Sten1	Sten2	Sten1	Sten2	Sten1	Sten2	Sten1
Aradu.A06	6374094		Sten2	Sten2	-	Sten2	Sten2	Sten2	Sten2	Sten2	Sten1	Sten2	Sten2	Sten2	Sten2	Sten2	Sten2	Sten1	Sten2	Sten1	-	Sten1	Sten2		-	Sten1	Sten1	Sten1	Sten2	Sten1	Sten2	Sten1	Sten2	Sten1
Aradu.A06	7334057		Sten1	Sten1	-	Sten1	Sten1	Sten1	Sten1	Sten1	-	Sten1	Sten1	Sten1	Sten1	Sten1	Sten1	Sten1	Sten1	Sten1	-	Sten1	Sten1		-	Sten1	Sten1	Sten1	Sten2	Sten1	-	Sten1	Sten2	Sten1
Aradu.A06	7672324		Sten2	Sten2	-	Sten2	Sten2	Sten2	Sten2	Sten2	Sten1	Sten2	Sten2	Sten2	Sten2	Sten2	Sten2	Sten2	Sten2	Sten1	-	Sten2	Sten2		-	Sten1	Sten1	Sten1	Sten2	Sten1	Sten2	Sten1	Sten2	Sten1
Aradu.A06	8149649		Sten2	Sten2	-	Sten2	Sten2	Sten2	Sten2	Sten2	Sten1	Sten2	Sten2	Sten2	Sten2	Sten2	Sten2	Sten2	Sten2	Sten1	-	Sten1	Sten2		-	Sten1	Sten1	Sten1	Sten2	Sten1	Sten2	Sten1	Sten2	Sten1
Aradu.A06	9574526		Sten2	Sten2	-	Sten2	Sten2	Sten2	Sten2	Sten2	Sten1	Sten2	Sten2	Sten2	Sten2	Sten2	Sten2	-	Sten2	Sten1	-	Sten1	Sten2		-	-	-	-	-	-	Sten1	-	Sten1	-
Aradu.A06	10688288		Sten2	Sten2	-	Sten2	Sten2	Sten2	Sten2	Sten2	Sten1	Sten2	Sten2	Sten2	Sten2	Sten2	Sten2	Sten1	Sten2	Sten1	-	Sten1	Sten2		-	Sten1	Sten1	Sten1	Sten2	Sten1	Sten2	Sten1	Sten2	Sten1
Aradu.A06	11846893		Sten2	Sten2	-	-	Sten2	Sten2	Sten2	Sten2	Sten1	Sten2	Sten2	Sten2	-	-	Sten2	-	Sten2	-	-	-	-		Sten2	-	Sten2	Sten1	Sten2	-	Sten1	Sten2	Sten1	Sten1
Aradu.A06	12964569		Sten2	Sten2	-	Sten2	Sten2	Sten2	Sten2	Sten2	Sten1	Sten2	Sten2	Sten2	Sten2	Sten2	Sten2	Sten1	Sten2	Sten1	-	Sten1	Sten2		-	Sten2	-	Sten1	Sten2	Sten1	Sten2	Sten1	Sten2	Sten1
Aradu.A06	14539952		Sten2	Sten2	Sten1	Sten2	Sten2	Sten2	Sten2	Sten2	Sten2	Sten2	Sten2	Sten2	Sten2	Sten2	Sten2	Sten2	Sten2	-	Sten1	Sten2	Sten2		-	Sten1	-	Sten1	-	Sten1	Sten2	Sten1	Sten2	Sten1
Aradu.A06	15715130		Sten2	Sten2	-	Sten2	Sten2	Sten2	Sten2	Sten2	Sten1	Sten2	Sten2	Sten2	Sten2	Sten2	Sten2	Sten1	Sten2	Sten1	-	Sten1	Sten2		-	Sten1	-	Sten1	Sten2	Sten1	Sten2	Sten1	Sten2	Sten1
Aradu.A06	16065445		Sten2	Sten2	Sten1	Sten2	Sten2	Sten2	Sten2	Sten2	Sten1	Sten2	Sten2	Sten2	Sten2	Sten2	Sten2	Sten2	Sten2	-	Sten1	Sten2	Sten2		-	Sten1	-	Sten1	Sten1	Sten1	Sten2	Sten1	Sten2	Sten1
Aradu.A06	16428344		Sten2	Sten2	-	Sten2	Sten2	Sten2	Sten2	Sten2	Sten1	Sten2	Sten2	Sten2	Sten2	Sten2	Sten2	Sten1	Sten2	Sten1	-	Sten1	Sten2		-	Sten1	-	Sten1	Sten2	Sten1	Sten2	Sten1	Sten2	Sten1
Aradu.A06	20970182		Sten2	Sten2	-	Sten2	Sten2	Sten2	Sten2	Sten2	Sten1	Sten2	Sten2	Sten2	Sten2	Sten2	Sten2	Sten1	Sten2	Sten1	-	Sten1	Sten2		-	Sten1	-	Sten1	Sten2	Sten1	Sten2	Sten1	Sten2	Sten1
Aradu.A06	24872134		-	-	-	-	-	-	-	-	-	-	-	-	-	-	-	-	-	-	-	-	-		-	-	-	-	-	-	-	-	-	-
Aradu.A06	32572657		Sten2	Sten2	-	Sten2	Sten2	Sten2	Sten2	Sten2	Sten1	Sten2	Sten2	Sten2	Sten2	Sten2	Sten2	Sten1	Sten2	Sten1	-	Sten1	Sten2		-	Sten1	-	Sten1	Sten2	Sten1	Sten2	Sten1	Sten2	Sten1
Aradu.A06	34785196		-	-	-	-	-	-	-	-	-	-	-	-	-	-	-	-	-	-	-	-	-		-	-	-	-	-	-	-	-	-	-
Aradu.A06	34826404		Sten2	Sten2	-	Sten2	Sten2	Sten2	Sten2	Sten2	Sten1	Sten2	Sten2	Sten2	Sten2	Sten2	Sten2	Sten1	Sten2	Sten1	-	Sten1	Sten2		-	Sten1	-	Sten1	Sten2	Sten1	Sten2	Sten1	Sten2	Sten1
Aradu.A06	41229012		-	-	-	-	-	-	-	-	-	-	-	-	-	-	-	-	-	-	-	-	-		-	-	-	-	-	-	-	-	-	-
Aradu.A06	51690304		Sten2	Sten2	Sten2	Sten2	Sten2	Sten2	Sten2	Sten2	Sten2	Sten2	Sten2	Sten2	Sten2	Sten2	Sten2	Sten2	Sten2	Sten2	Sten2	Sten2	Sten2		-	Sten1	-	Sten1	Sten1	Sten1	Sten2	Sten1	Sten2	Sten1
Aradu.A06	52572560		Sten2	Sten2	-	Sten2	Sten2	Sten2	Sten2	Sten2	Sten1	Sten2	Sten2	Sten2	Sten2	Sten2	Sten2	Sten2	Sten2	Sten1	-	-	Sten2		-	Sten1	-	Sten1	Sten2	Sten1	Sten2	Sten1	Sten2	Sten1
Aradu.A06	66423228		Sten2	Sten2	-	Sten2	Sten2	Sten2	Sten2	Sten2	Sten1	Sten2	Sten2	Sten2	Sten2	Sten2	Sten2	Sten1	Sten2	Sten1	-	Sten2	Sten2		-	Sten1	-	Sten1	Sten2	Sten1	Sten2	Sten1	Sten2	Sten1
Aradu.A06	69243064		Sten1	Sten1	-	Sten1	Sten1	Sten1	Sten1	Sten1	Sten1	Sten1	Sten1	Sten1	Sten1	Sten1	Sten1	Sten1	Sten1	Sten1	-	Sten1	Sten1		-	Sten1	-	Sten1	-	Sten1	Sten2	Sten1	Sten2	Sten1
Aradu.A06	69243068		-	-	-	-	-	-	-	-	-	-	-	-	-	-	-	-	-	-	-	-	-		-	-	-	-	-	-	-	-	-	-
Aradu.A06	69465627		Sten2	Sten2	-	Sten2	Sten2	Sten2	Sten2	Sten2	Sten1	Sten2	Sten2	Sten2	Sten2	Sten2	Sten2	Sten2	Sten2	Sten1	-	Sten2	Sten2		-	Sten1	-	Sten1	Sten2	Sten1	Sten2	Sten1	Sten2	Sten1
Aradu.A06	79848717		-	-	-	-	-	-	-	-	-	-	-	-	-	-	-	-	-	-	-	-	-		-	-	-	-	-	-	-	-	-	-
Aradu.A06	79851479		Sten2	Sten2	-	Sten2	Sten2	Sten2	Sten2	Sten2	Sten1	Sten2	Sten2	Sten2	Sten2	Sten2	Sten2	Sten1	Sten2	Sten1	-	Sten1	Sten2		-	Sten1	-	Sten1	Sten2	Sten1	Sten2	Sten1	Sten2	Sten1
Aradu.A06	79933722		Sten1	Sten2	Sten1	Sten2	Sten2	Sten2	Sten2	Sten2	Sten2	Sten2	Sten2	-	Sten2	Sten2	Sten2	-	Sten2	Sten1	Sten1	-	-		-	Sten1	-	Sten1	Sten1	Sten1	-	Sten1	Sten2	Sten1
Aradu.A06	80755197		Sten2	Sten2	-	Sten2	Sten2	Sten2	Sten2	Sten2	Sten1	Sten2	Sten2	Sten2	Sten2	Sten2	Sten2	-	Sten2	Sten1	-	Sten1	Sten2		-	Sten1	-	Sten1	Sten2	Sten1	Sten2	Sten1	Sten2	Sten1
Aradu.A06	82779126		Sten2	Sten2	-	Sten2	Sten2	Sten2	Sten2	Sten2	Sten1	Sten2	Sten2	Sten2	Sten2	Sten2	Sten2	Sten1	Sten2	Sten1	-	Sten1	Sten2		-	Sten1	-	Sten1	Sten2	Sten1	Sten2	Sten1	Sten2	Sten1
Aradu.A06	82779734		Sten2	Sten2	-	Sten2	Sten2	Sten2	Sten2	Sten2	Sten1	Sten2	Sten2	Sten2	Sten2	Sten2	Sten2	Sten1	Sten2	Sten1	-	Sten1	Sten2		-	Sten1	-	Sten1	Sten2	Sten1	Sten2	Sten1	Sten2	Sten1
Aradu.A06	83182983		Sten2	Sten2	-	Sten2	Sten2	Sten2	Sten2	Sten2	Sten1	Sten2	Sten2	Sten2	Sten2	Sten2	Sten2	Sten1	Sten2	Sten1	-	-	Sten2		-	Sten1	-	Sten1	Sten2	Sten1	Sten2	Sten1	Sten2	Sten1
Aradu.A06	84013115		-	-	-	-	-	-	-	-	-	-	-	-	-	-	-	-	-	-	-	-	-		-	-	-	-	-	-	-	-	-	-
Aradu.A06	85149263		-	-	-	-	-	-	-	-	-	-	-	-	-	-	-	-	-	-	-	-	-		-	-	-	-	-	-	-	-	-	-
Aradu.A06	86792360		Sten1	Sten1	-	Sten1	Sten1	Sten1	Sten1	Sten1	Sten1	Sten1	Sten1	Sten1	Sten1	Sten1	Sten1	Sten1	Sten1	Sten1	-	Sten1	Sten1		-	-	-	-	Sten1	-	-	-	-	-
Aradu.A06	91658393		Sten2	Sten2	-	Sten2	Sten2	Sten2	Sten2	Sten2	Sten1	Sten2	Sten2	Sten2	Sten2	Sten2	Sten2	Sten1	Sten2	Sten1	-	Sten2	Sten2		-	Sten1	-	Sten1	Sten2	Sten1	Sten2	Sten1	Sten2	Sten1
Aradu.A06	92280811		Sten2	Sten2	-	Sten1	-	Sten2	Sten2	Sten2	Sten1	-	Sten2	Sten2	Sten2	-	Sten2	Sten2	Sten2	-	Sten1	Sten2	Sten2		-	-	Sten1	-	Sten1	-	-	-	Sten1	-
Aradu.A06	93862557		-	-	-	-	-	-	-	-	-	-	-	-	-	-	-	-	-	-	-	-	-		Sten1	-	Sten1	-	Sten1	-	-	Sten1	-	-
Aradu.A06	94129577		Sten2	Sten2	-	Sten2	Sten2	Sten2	Sten2	Sten2	Sten1	Sten2	Sten2	Sten2	Sten2	Sten2	Sten2	Sten2	Sten2	Sten1	-	Sten2	Sten2		-	Sten1	-	Sten1	Sten1	Sten1	Sten2	Sten1	Sten2	Sten1
Aradu.A06	97062653		Sten2	Sten2	-	Sten2	Sten2	Sten2	Sten2	Sten2	Sten1	Sten2	Sten2	Sten2	Sten2	Sten2	Sten2	-	Sten2	Sten1	-	Sten2	Sten2		-	Sten1	-	Sten1	Sten1	Sten1	Sten2	Sten1	Sten2	Sten1
Aradu.A06	97902979		Sten2	Sten2	-	Sten2	Sten2	Sten2	Sten2	Sten2	Sten1	Sten2	Sten2	Sten2	Sten2	Sten2	Sten2	Sten1	Sten2	Sten1	-	Sten1	Sten2		Sten1	Sten1	-	Sten1	Sten2	Sten1	Sten2	Sten1	Sten2	Sten1
Aradu.A06	97904366		Sten2	Sten2	-	Sten2	Sten2	Sten2	Sten2	Sten2	Sten1	Sten2	Sten2	Sten2	Sten2	Sten2	Sten2	-	Sten2	Sten1	-	Sten1	Sten2		Sten1	Sten1	-	Sten1	Sten2	Sten1	Sten2	Sten1	Sten2	Sten1
Aradu.A06	98751250		Sten2	Sten2	-	Sten2	Sten2	Sten2	Sten2	Sten2	-	Sten2	Sten2	Sten2	Sten2	Sten2	Sten2	-	Sten2	Sten1	-	Sten1	Sten2		Sten1	Sten1	-	Sten1	Sten2	Sten1	Sten2	Sten1	Sten2	Sten1
Aradu.A06	99250062		Sten2	Sten2	-	Sten2	Sten2	Sten2	Sten2	Sten2	Sten1	Sten2	Sten2	Sten2	Sten2	Sten2	Sten2	-	Sten2	Sten1	-	-	Sten2		Sten1	Sten1	-	Sten1	Sten2	Sten1	Sten2	Sten1	Sten2	Sten1
Aradu.A06	99493705		Sten2	Sten2	-	Sten2	Sten2	Sten2	Sten2	Sten2	Sten1	Sten2	Sten2	Sten2	Sten2	Sten2	Sten2	Sten1	Sten2	Sten1	-	Sten1	Sten2		Sten1	Sten1	-	Sten1	Sten2	Sten1	Sten2	Sten1	Sten2	Sten1
Aradu.A06	99772542		Sten2	Sten2	-	Sten2	Sten2	Sten2	Sten2	Sten2	Sten2	Sten2	Sten2	Sten2	Sten2	Sten2	Sten2	Sten1	Sten2	Sten1	-	Sten1	Sten2		Sten1	Sten1	-	Sten1	Sten2	Sten1	Sten2	Sten1	Sten2	Sten1
Aradu.A06	100317242		Sten2	Sten2	-	Sten2	Sten2	Sten2	Sten2	Sten2	Sten1	Sten2	Sten2	Sten2	Sten2	Sten2	Sten2	Sten1	Sten2	Sten1	-	Sten1	Sten2		Sten1	Sten1	-	Sten1	Sten2	Sten1	Sten2	Sten1	Sten2	Sten1
Aradu.A06	101146798		Sten2	Sten2	-	Sten2	Sten2	Sten2	Sten2	Sten2	Sten1	Sten2	Sten2	Sten2	Sten2	Sten2	Sten2	Sten1	Sten2	Sten1	-	Sten2	Sten2		Sten1	Sten1	-	Sten1	Sten2	Sten1	Sten2	Sten1	Sten2	Sten1
Aradu.A06	101300979		Sten2	Sten2	-	Sten2	Sten2	Sten2	Sten2	Sten2	Sten1	Sten2	Sten2	Sten2	Sten2	Sten2	Sten2	Sten1	Sten2	Sten1	-	Sten1	Sten2		Sten1	Sten1	-	Sten1	Sten2	Sten1	Sten2	Sten1	Sten2	Sten1
Aradu.A06	102679941		Sten2	Sten2	-	Sten2	Sten2	Sten2	Sten2	Sten2	Sten1	Sten2	Sten2	Sten2	Sten2	Sten2	Sten2	Sten1	Sten2	Sten1	-	-	Sten2		Sten1	Sten1	-	Sten1	Sten2	Sten1	Sten2	Sten1	Sten2	Sten1
Aradu.A06	102694392		Sten1	Sten1	-	Sten1	Sten1	Sten1	Sten1	Sten1	Sten1	Sten1	Sten1	Sten1	Sten1	Sten1	Sten1	Sten1	Sten1	Sten1	-	Sten1	Sten1		-	-	-	-	Sten1	-	-	-	-	-
Aradu.A06	103181434		Sten2	Sten2	-	Sten2	Sten2	Sten2	Sten2	Sten2	Sten1	Sten2	Sten2	Sten2	Sten2	Sten2	Sten2	-	Sten2	Sten1	-	Sten1	Sten2		Sten1	Sten1	-	Sten1	Sten2	Sten1	Sten2	Sten1	Sten2	Sten1
Aradu.A06	103342388		Sten2	Sten2	-	Sten2	Sten2	Sten2	Sten2	Sten2	Sten1	Sten2	Sten2	Sten2	Sten2	Sten2	Sten2	Sten1	Sten2	Sten1	-	Sten1	Sten2		Sten1	Sten1	-	Sten1	Sten2	Sten1	Sten2	Sten1	Sten2	Sten1
Aradu.A06	104836791		Sten1	Sten1	-	Sten1	Sten1	Sten1	Sten1	Sten1	-	Sten1	Sten1	Sten1	Sten1	Sten1	Sten1	Sten1	Sten1	-	-	Sten1	Sten1		Sten1	Sten1	Sten1	-	Sten1	Sten1	-	-	-	-
Aradu.A06	105027171		Sten2	Sten2	-	Sten2	Sten2	Sten2	Sten2	Sten2	Sten1	Sten2	Sten2	Sten2	Sten2	Sten2	Sten2	Sten1	Sten2	-	-	Sten1	Sten2		Sten1	Sten1	-	-	Sten2	Sten1	Sten2	Sten1	Sten2	Sten1
Aradu.A06	105029082		Sten2	Sten2	-	Sten2	Sten2	Sten2	Sten2	Sten2	Sten1	Sten2	Sten2	Sten2	Sten2	Sten2	Sten2	Sten1	Sten2	Sten1	-	Sten1	Sten2		Sten1	Sten1	-	Sten1	Sten2	Sten1	Sten2	Sten1	Sten2	Sten1
Aradu.A06	105157006		Sten2	Sten2	-	Sten2	Sten2	Sten2	Sten2	Sten2	Sten1	Sten2	Sten2	Sten2	Sten2	Sten2	Sten2	Sten1	Sten2	-	-	Sten2	Sten2		Sten2	Sten2	-	Sten2	-	Sten2	Sten2	Sten2	Sten2	Sten2
Aradu.A06	105470812		Sten2	Sten2	-	Sten2	Sten2	Sten2	Sten2	Sten2	Sten1	Sten2	Sten2	Sten2	Sten2	Sten2	Sten2	-	Sten2	Sten1	-	Sten1	Sten2		Sten1	Sten1	-	Sten1	Sten2	Sten1	Sten2	Sten1	Sten2	Sten1
Aradu.A06	106951673		Sten1	Sten1	-	Sten1	Sten1	Sten1	Sten1	Sten1	-	Sten1	Sten1	Sten1	Sten1	Sten1	Sten1	Sten1	Sten1	Sten1	-	-	Sten1		Sten1	Sten1	-	Sten1	Sten2	Sten1	Sten2	Sten1	Sten2	Sten1
Aradu.A06	107413089		Sten2	Sten2	-	Sten2	Sten2	Sten2	Sten2	Sten2	Sten1	Sten2	Sten2	Sten2	Sten2	Sten2	Sten2	Sten1	Sten2	Sten1	-	-	Sten2		Sten1	Sten1	-	Sten1	Sten2	Sten1	Sten2	Sten1	Sten2	Sten1
Aradu.A06	107413443		Sten1	Sten1	-	Sten1	Sten1	Sten1	Sten1	Sten1	-	Sten1	Sten1	Sten1	Sten1	Sten1	Sten1	-	Sten1	-	-	Sten1	Sten1		-	-	-	-	-	-	Sten1	-	Sten1	-
Aradu.A06	108736195		Sten2	Sten2	Sten1	Sten2	Sten2	Sten2	Sten2	Sten2	-	Sten2	Sten2	Sten2	Sten2	Sten2	Sten2	Sten2	Sten2	Sten1	Sten1	Sten2	Sten2		Sten1	-	-	-	Sten1	-	Sten1	-	Sten1	-
Aradu.A06	109385384		Sten2	-	-	Sten2	Sten1	Sten1	-	-	-	-	-	-	-	-	-	Sten2	-	-	Sten2	Sten2	-		Sten2	Sten2	-	Sten1	Sten2	-	Sten1	Sten1	-	Sten1
Aradu.A06	110550534		Sten2	Sten2	-	Sten2	Sten1	Sten2	Sten2	Sten2	Sten1	Sten2	Sten2	Sten2	Sten2	Sten2	Sten2	-	Sten2	-	-	Sten1	Sten2		Sten1	Sten1	-	Sten1	Sten2	-	Sten2	Sten1	Sten2	Sten1
Aradu.A06	110634476		Sten2	Sten2	-	Sten2	Sten1	Sten2	Sten2	Sten2	Sten1	Sten2	Sten2	Sten2	Sten2	Sten2	Sten2	Sten2	Sten2	Sten2	-	Sten1	Sten2		Sten1	Sten1	-	Sten1	Sten2	-	Sten2	Sten1	Sten2	Sten1
Aradu.A06	110636015		Sten2	Sten2	-	Sten2	Sten1	Sten2	Sten2	Sten2	Sten1	Sten2	Sten2	Sten2	Sten2	Sten2	Sten2	Sten1	Sten2	Sten2	-	Sten2	Sten2		Sten1	Sten1	-	Sten1	Sten2	-	Sten2	Sten1	Sten2	Sten1
Aradu.A06	110707714		-	Sten2	-	Sten2	Sten1	Sten2	Sten2	Sten2	Sten1	Sten2	Sten2	Sten2	Sten2	Sten2	Sten2	Sten1	Sten2	Sten2	-	Sten1	Sten2		Sten1	Sten1	-	Sten1	Sten2	-	Sten2	Sten1	Sten2	Sten1
Aradu.A06	110755932		-	Sten1	-	Sten1	Sten1	Sten1	Sten1	Sten1	Sten1	Sten1	Sten1	Sten1	Sten1	Sten1	Sten1	Sten1	Sten1	Sten1	-	Sten1	Sten1		Sten1	Sten1	-	Sten1	-	-	Sten2	Sten1	Sten2	Sten1
Aradu.A06	110815427		-	Sten2	-	Sten2	Sten1	Sten2	Sten2	Sten2	Sten1	Sten2	Sten2	Sten2	Sten2	Sten2	Sten2	Sten1	Sten2	Sten1	-	Sten1	Sten2		Sten1	Sten1	-	Sten1	Sten2	-	Sten2	Sten1	Sten2	Sten1
Aradu.A06	110816722		-	Sten2	-	Sten2	Sten1	Sten2	Sten2	Sten2	Sten1	Sten2	Sten2	Sten2	Sten2	Sten2	Sten2	Sten1	Sten2	Sten1	-	Sten1	Sten2		Sten1	Sten1	-	Sten1	Sten2	-	Sten2	Sten1	Sten2	Sten1
Aradu.A06	110820404		-	Sten2	-	Sten2	Sten1	Sten2	Sten2	Sten2	Sten1	Sten2	Sten2	Sten2	Sten2	Sten2	Sten2	Sten1	Sten2	Sten1	-	Sten2	Sten2		Sten1	Sten1	-	Sten1	Sten2	-	Sten2	Sten1	Sten2	Sten1
Aradu.A06	110905105		-	Sten2	-	Sten2	Sten1	Sten2	Sten2	Sten2	Sten1	Sten2	Sten2	Sten2	Sten2	Sten2	Sten2	Sten1	Sten2	Sten1	-	Sten1	Sten2		Sten1	Sten1	-	Sten1	Sten2	-	Sten2	Sten1	Sten2	Sten1
Aradu.A06	110975358		-	Sten2	-	Sten2	Sten1	Sten2	Sten2	Sten2	Sten1	Sten2	Sten2	Sten2	Sten2	Sten2	Sten2	Sten1	Sten2	Sten1	-	Sten1	Sten2		Sten1	Sten1	-	Sten1	Sten2	-	Sten2	Sten1	Sten2	Sten1
Aradu.A06	112388824		-	Sten1	-	Sten2	Sten1	Sten2	Sten2	Sten2	Sten1	Sten2	Sten2	Sten2	Sten2	Sten2	Sten2	Sten1	Sten2	Sten1	-	-	Sten2		Sten1	Sten1	-	Sten1	-	-	Sten2	Sten1	Sten2	Sten1
Aradu.A06	112447942		-	Sten1	-	Sten2	Sten1	Sten2	Sten2	Sten2	Sten1	Sten2	Sten2	Sten2	Sten2	Sten2	Sten2	Sten1	Sten2	Sten1	-	Sten1	Sten2		Sten1	Sten1	-	Sten1	-	-	Sten2	Sten1	Sten2	Sten1
Aradu.A07	1125060		Sten1	Sten1	Sten1	Sten1	Sten1	Sten1	Sten1	Sten1	Sten1	Sten1	Sten1	Sten1	Sten1	Sten1	Sten1	Sten1	Sten1	Sten1	Sten1	Sten1	Sten1		-	-	-	-	-	-	-	-	-	-
Aradu.A07	1207098		-	-	-	-	-	-	-	-	-	-	-	-	-	-	-	-	-	-	-	-	-		-	-	-	-	-	-	-	-	-	-
Aradu.A07	1715115		-	-	-	-	-	-	-	-	-	-	-	-	-	-	-	-	-	-	-	-	-		-	-	-	-	-	-	-	-	-	-
Aradu.A07	2502673		-	-	-	-	-	-	-	-	-	-	-	-	-	-	-	-	-	-	-	-	-		-	-	-	-	-	-	-	-	-	-
Aradu.A07	3935556		-	-	-	-	-	-	-	-	-	-	-	-	-	-	-	-	-	-	-	-	-		-	-	-	-	-	-	-	-	-	-
Aradu.A07	4215693		-	-	-	-	-	-	-	-	-	-	-	-	-	-	-	-	-	-	-	-	-		-	-	-	-	-	-	-	-	-	-
Aradu.A07	4359598		-	-	-	-	-	-	-	-	-	-	-	-	-	-	-	-	-	-	-	-	-		-	-	-	-	-	-	-	-	-	-
Aradu.A07	4510195		-	-	-	-	-	-	-	-	-	-	-	-	-	-	-	-	-	-	-	-	-		-	-	-	-	-	-	-	-	-	-
Aradu.A07	4560066		-	-	-	-	-	-	-	-	-	-	-	-	-	-	-	-	-	-	-	-	-		-	-	-	-	-	-	-	-	-	-
Aradu.A07	4808653		-	-	-	-	-	-	-	-	-	-	-	-	-	-	-	-	-	-	-	-	-		-	-	-	-	-	-	-	-	-	-
Aradu.A07	5325989		-	-	-	-	-	-	-	-	-	-	-	-	-	-	-	-	-	-	-	-	-		-	-	-	-	-	-	-	-	-	-
Aradu.A07	5364934		-	-	-	-	-	-	-	-	-	-	-	-	-	-	-	-	-	-	-	-	-		-	-	-	-	-	-	-	-	-	-
Aradu.A07	5372319		-	-	-	-	-	-	-	-	-	-	-	-	-	-	-	-	-	-	-	-	-		-	-	-	-	-	-	-	-	-	-
Aradu.A07	5513063		-	-	-	-	-	-	-	-	-	-	-	-	-	-	-	-	-	-	-	-	-		-	-	-	-	-	-	-	-	-	-
Aradu.A07	6901139		-	-	-	-	-	-	-	-	-	-	-	-	-	-	-	-	-	-	-	-	-		-	-	-	-	-	-	-	-	-	-
Aradu.A07	8218053		-	-	-	-	-	-	-	-	-	-	-	-	-	-	-	-	-	-	-	-	-		-	-	-	-	-	-	-	-	-	-
Aradu.A07	8855622		-	-	-	-	-	-	-	-	-	-	-	-	-	-	-	-	-	-	-	-	-		-	-	-	-	-	-	-	-	-	-
Aradu.A07	9729090		-	-	-	-	-	-	-	-	-	-	-	-	-	-	-	-	-	-	-	-	-		-	-	-	-	-	-	-	-	-	-
Aradu.A07	10930537		-	-	-	-	-	-	-	-	-	-	-	-	-	-	-	-	-	-	-	-	-		-	-	-	-	-	-	-	-	-	-
Aradu.A07	14523193		-	-	-	-	-	-	-	-	-	-	-	-	-	-	-	-	-	-	-	-	-		-	-	-	-	-	-	-	-	-	-
Aradu.A07	14860287		-	-	-	-	-	-	-	-	-	-	-	-	-	-	-	-	-	-	-	-	-		-	-	-	-	-	-	-	-	-	-
Aradu.A07	14860341		-	-	-	-	-	-	-	-	-	-	-	-	-	-	-	-	-	-	-	-	-		-	-	-	-	-	-	-	-	-	-
Aradu.A07	15199143		-	-	-	-	-	-	-	-	-	-	-	-	-	-	-	-	-	-	-	-	-		-	-	-	-	-	-	-	-	-	-
Aradu.A07	15218169		-	-	-	-	-	-	-	-	-	-	-	-	-	-	-	-	-	-	-	-	-		-	-	-	-	-	-	-	-	-	-
Aradu.A07	17133488		-	-	-	-	-	-	-	-	-	-	-	-	-	-	-	-	-	-	-	-	-		-	-	-	-	-	-	-	-	-	-
Aradu.A07	17218154		-	-	-	-	-	-	-	-	-	-	-	-	-	-	-	-	-	-	-	-	-		-	-	-	-	-	-	-	-	-	-
Aradu.A07	17302902		-	-	-	-	-	-	-	-	-	-	-	-	-	-	-	-	-	-	-	-	-		-	-	-	-	-	-	-	-	-	-
Aradu.A07	17626380		-	-	-	-	-	-	-	-	-	-	-	-	-	-	-	-	-	-	-	-	-		-	-	-	-	-	-	-	-	-	-
Aradu.A07	17643601		-	-	-	-	-	-	-	-	-	-	-	-	-	-	-	-	-	-	-	-	-		-	-	-	-	-	-	-	-	-	-
Aradu.A07	17707397		-	-	-	-	-	-	-	-	Sten1	-	-	-	-	-	-	-	-	-	-	-	-		-	-	-	-	-	-	-	-	-	-
Aradu.A07	17731546		-	-	-	-	-	-	-	-	Sten1	-	-	-	-	-	-	-	-	-	-	-	-		-	-	-	-	-	-	-	-	-	-
Aradu.A07	17731627		-	-	-	-	-	-	-	-	-	-	-	-	-	-	-	-	-	-	-	-	-		-	-	-	-	-	-	-	-	-	-
Aradu.A07	17754802		-	-	-	-	-	-	-	-	Sten1	-	-	-	-	-	-	-	-	-	-	-	-		-	-	-	-	-	-	-	-	-	-
Aradu.A07	17768688		-	-	-	-	-	-	-	-	-	-	-	-	-	-	-	-	-	-	-	-	-		-	-	-	-	-	-	-	-	-	-
Aradu.A07	17772008		-	-	-	-	-	-	-	-	Sten1	-	-	-	-	-	-	-	-	-	-	-	-		-	-	-	-	-	-	-	-	-	-
Aradu.A07	18169045		-	-	-	-	-	-	-	-	Sten1	-	-	-	-	-	-	-	-	-	-	-	-		-	-	-	-	-	-	-	-	-	-
Aradu.A07	18169049		-	-	-	-	-	-	-	-	Sten2	-	-	-	-	-	-	-	-	-	-	-	-		-	-	-	-	-	-	-	-	-	-
Aradu.A07	18174560		-	-	-	-	-	-	-	-	Sten2	-	-	-	-	-	-	-	-	-	-	-	-		-	-	-	-	-	-	-	-	-	-
Aradu.A07	18174579		-	-	-	-	-	-	-	-	Sten1	-	-	-	-	-	-	-	-	-	-	-	-		-	-	-	-	-	-	-	-	-	-
Aradu.A07	18174822		-	-	-	-	-	-	-	-	Sten1	-	-	-	-	-	-	-	-	-	-	-	-		-	-	-	-	-	-	-	-	-	-
Aradu.A07	18174900		-	-	-	-	-	-	-	-	Sten2	-	-	-	-	-	-	-	-	-	-	-	-		-	-	-	-	-	-	-	-	-	-
Aradu.A07	18175074		-	-	-	-	-	-	-	-	Sten2	-	-	-	-	-	-	-	-	-	-	-	-		-	-	-	-	-	-	-	-	-	-
Aradu.A07	18175193		-	-	-	-	-	-	-	-	Sten1	-	-	-	-	-	-	-	-	-	-	-	-		-	-	-	-	-	-	-	-	-	-
Aradu.A07	18175255		-	-	-	-	-	-	-	-	Sten1	-	-	-	-	-	-	-	-	-	-	-	-		-	-	-	-	-	-	-	-	-	-
Aradu.A07	18175303		-	-	-	-	-	-	-	-	Sten1	-	-	-	-	-	-	-	-	-	-	-	-		-	-	-	-	-	-	-	-	-	-
Aradu.A07	18175313		-	-	-	-	-	-	-	-	Sten2	-	-	-	-	-	-	-	-	-	-	-	-		-	-	-	-	-	-	-	-	-	-
Aradu.A07	18175433		-	-	-	-	-	-	-	-	Sten1	-	-	-	-	-	-	-	-	-	-	-	-		-	-	-	-	-	-	-	-	-	-
Aradu.A07	18175433		-	-	-	-	-	-	-	-	Sten1	-	-	-	-	-	-	-	-	-	-	-	-		-	-	-	-	-	-	-	-	-	-
Aradu.A07	18175548		-	-	-	-	-	-	-	-	Sten2	-	-	-	-	-	-	-	-	-	-	-	-		-	-	-	-	-	-	-	-	-	-
Aradu.A07	18175575		-	-	-	-	-	-	-	-	Sten1	-	-	-	-	-	-	-	-	-	-	-	-		-	-	-	-	-	-	-	-	-	-
Aradu.A07	18175653		-	-	-	-	-	-	-	-	Sten1	-	-	-	-	-	-	-	-	-	-	-	-		-	-	-	-	-	-	-	-	-	-
Aradu.A07	18175936		-	-	-	-	-	-	-	-	Sten2	-	-	-	-	-	-	-	-	-	-	-	-		-	-	-	-	-	-	-	-	-	-
Aradu.A07	18175967		-	-	-	-	-	-	-	-	Sten2	-	-	-	-	-	-	-	-	-	-	-	-		-	-	-	-	-	-	-	-	-	-
Aradu.A07	18176260		-	-	-	-	-	-	-	-	Sten2	-	-	-	-	-	-	-	-	-	-	-	-		-	-	-	-	-	-	-	-	-	-
Aradu.A07	18176735		-	-	-	-	-	-	-	-	Sten2	-	-	-	-	-	-	-	-	-	-	-	-		-	-	-	-	-	-	-	-	-	-
Aradu.A07	18176770		-	-	-	-	-	-	-	-	Sten2	-	-	-	-	-	-	-	-	-	-	-	-		-	-	-	-	-	-	-	-	-	-
Aradu.A07	18176796		-	-	-	-	-	-	-	-	Sten1	-	-	-	-	-	-	-	-	-	-	-	-		-	-	-	-	-	-	-	-	-	-
Aradu.A07	18176872		-	-	-	-	-	-	-	-	Sten1	-	-	-	-	-	-	-	-	-	-	-	-		-	-	-	-	-	-	-	-	-	-
Aradu.A07	18176883		-	-	-	-	-	-	-	-	-	-	-	-	-	-	-	-	-	-	-	-	-		-	-	-	-	-	-	-	-	-	-
Aradu.A07	18176920		-	-	-	-	-	-	-	-	Sten1	-	-	-	-	-	-	-	-	-	-	-	-		-	-	-	-	-	-	-	-	-	-
Aradu.A07	18176943		-	-	-	-	-	-	-	-	Sten1	-	-	-	-	-	-	-	-	-	-	-	-		-	-	-	-	-	-	-	-	-	-
Aradu.A07	18176946		-	-	-	-	-	-	-	-	Sten1	-	-	-	-	-	-	-	-	-	-	-	-		-	-	-	-	-	-	-	-	-	-
Aradu.A07	18177083		-	-	-	-	-	-	-	-	Sten1	-	-	-	-	-	-	-	-	-	-	-	-		-	-	-	-	-	-	-	-	-	-
Aradu.A07	18177119		-	-	-	-	-	-	-	-	Sten1	-	-	-	-	-	-	-	-	-	-	-	-		-	-	-	-	-	-	-	-	-	-
Aradu.A07	18177448		-	-	-	-	-	-	-	-	Sten1	-	-	-	-	-	-	-	-	-	-	-	-		-	-	-	-	-	-	-	-	-	-
Aradu.A07	18177486		-	-	-	-	-	-	-	-	Sten1	-	-	-	-	-	-	-	-	-	-	-	-		-	-	-	-	-	-	-	-	-	-
Aradu.A07	18177497		-	-	-	-	-	-	-	-	Sten1	-	-	-	-	-	-	-	-	-	-	-	-		-	-	-	-	-	-	-	-	-	-
Aradu.A07	18177556		-	-	-	-	-	-	-	-	Sten1	-	-	-	-	-	-	-	-	-	-	-	-		-	-	-	-	-	-	-	-	-	-
Aradu.A07	18177607		-	-	-	-	-	-	-	-	Sten2	-	-	-	-	-	-	-	-	-	-	-	-		-	-	-	-	-	-	-	-	-	-
Aradu.A07	18177810		-	-	-	-	-	-	-	-	Sten1	-	-	-	-	-	-	-	-	-	-	-	-		-	-	-	-	-	-	-	-	-	-
Aradu.A07	18177857		-	-	-	-	-	-	-	-	Sten1	-	-	-	-	-	-	-	-	-	-	-	-		-	-	-	-	-	-	-	-	-	-
Aradu.A07	18178284		-	-	-	-	-	-	-	-	Sten2	-	-	-	-	-	-	-	-	-	-	-	-		-	-	-	-	-	-	-	-	-	-
Aradu.A07	18178505		-	-	-	-	-	-	-	-	Sten1	-	-	-	-	-	-	-	-	-	-	-	-		-	-	-	-	-	-	-	-	-	-
Aradu.A07	18178701		-	-	-	-	-	-	-	-	-	-	-	-	-	-	-	-	-	-	-	-	-		-	-	-	-	-	-	-	-	-	-
Aradu.A07	18178777		-	-	-	-	-	-	-	-	Sten2	-	-	-	-	-	-	-	-	-	-	-	-		-	-	-	-	-	-	-	-	-	-
Aradu.A07	18178904		-	-	-	-	-	-	-	-	Sten1	-	-	-	-	-	-	-	-	-	-	-	-		-	-	-	-	-	-	-	-	-	-
Aradu.A07	18178939		-	-	-	-	-	-	-	-	Sten2	-	-	-	-	-	-	-	Sten1	-	-	-	-		-	-	-	-	-	-	-	-	-	-
Aradu.A07	18178972		-	-	-	-	-	-	-	-	Sten1	-	-	-	-	-	-	-	-	-	-	-	-		-	-	-	-	-	-	-	-	-	-
Aradu.A07	18179068		-	-	-	-	-	-	-	-	Sten2	-	-	-	-	-	-	-	-	-	-	-	-		-	-	-	-	-	-	-	-	-	-
Aradu.A07	18179069		-	-	-	-	-	-	-	-	Sten2	-	-	-	-	-	-	-	-	-	-	-	-		-	-	-	-	-	-	-	-	-	-
Aradu.A07	18179075		-	-	-	-	-	-	-	-	Sten2	-	-	-	-	-	-	-	-	-	-	-	-		-	-	-	-	-	-	-	-	-	-
Aradu.A07	18179077		-	-	-	-	-	-	-	-	Sten1	-	-	-	-	-	-	-	-	-	-	-	-		-	-	-	-	-	-	-	-	-	-
Aradu.A07	18179140		-	-	-	-	-	-	-	-	Sten1	-	-	-	-	-	-	-	-	-	-	-	-		-	-	-	-	-	-	-	-	-	-
Aradu.A07	18179160		-	-	-	-	-	-	-	-	Sten2	-	-	-	-	-	-	-	-	-	-	-	-		-	-	-	-	-	-	-	-	-	-
Aradu.A07	18179163		-	-	-	-	-	-	-	-	Sten1	-	-	-	-	-	-	-	-	-	-	-	-		-	-	-	-	-	-	-	-	-	-
Aradu.A07	18179461		-	-	-	-	-	-	-	-	Sten2	-	-	-	-	-	-	-	-	-	-	-	-		-	-	-	-	-	-	-	-	-	-
Aradu.A07	18179526		-	-	-	-	-	-	-	-	Sten1	-	-	-	-	-	-	-	-	-	-	-	-		-	-	-	-	-	-	-	-	-	-
Aradu.A07	18180024		-	-	-	-	-	-	-	-	Sten2	-	-	-	-	-	-	-	-	-	-	-	-		-	-	-	-	-	-	-	-	-	-
Aradu.A07	18180236		-	-	-	-	-	-	-	-	Sten1	-	-	-	-	-	-	-	-	-	-	-	-		-	-	-	-	-	-	-	-	-	-
Aradu.A07	18180239		-	-	-	-	-	-	-	-	Sten1	-	-	-	-	-	-	-	-	-	-	-	-		-	-	-	-	-	-	-	-	-	-
Aradu.A07	18180316		-	-	-	-	-	-	-	-	Sten1	-	-	-	-	-	-	-	-	-	-	-	-		-	-	-	-	-	-	-	-	-	-
Aradu.A07	18180358		-	-	-	-	-	-	-	-	-	-	-	-	-	-	-	-	-	-	-	-	-		-	-	-	-	-	-	-	-	-	-
Aradu.A07	18180594		-	-	-	-	-	-	-	-	Sten1	-	-	-	-	-	-	-	-	-	-	-	-		-	-	-	-	-	-	-	-	-	-
Aradu.A07	23406393		-	-	-	-	-	-	-	-	-	-	-	-	-	-	-	-	-	-	-	-	-		-	-	-	-	-	-	-	-	-	-
Aradu.A07	23988146		-	-	-	-	-	-	-	-	-	-	-	-	-	-	-	-	-	-	-	-	-		-	-	-	-	-	-	-	-	-	-
Aradu.A07	24823307		Sten2	-	-	Sten2	Sten1	Sten1	-	-	Sten1	-	-	-	-	-	-	Sten2	-	-	Sten2	Sten2	-		Sten1	Sten1	-	Sten1	Sten2	-	Sten1	Sten1	Sten2	Sten1
Aradu.A07	26175719		-	-	-	-	-	-	-	-	-	-	-	-	-	-	-	-	-	-	-	-	-		-	-	-	-	-	-	-	-	-	-
Aradu.A07	26203823		-	-	-	-	-	-	-	-	Sten1	-	-	-	-	-	-	-	-	-	-	-	-		-	-	-	-	-	-	-	-	-	-
Aradu.A07	26204759		-	-	-	-	-	-	-	-	Sten1	-	-	-	-	-	-	-	-	-	-	-	-		-	-	-	-	-	-	-	-	-	-
Aradu.A07	26329688		-	-	-	-	-	-	-	-	Sten1	-	-	-	-	-	-	-	-	-	-	-	-		-	-	-	-	-	-	-	-	-	-
Aradu.A07	28320911		-	-	-	-	-	-	-	-	-	-	-	-	-	-	-	-	-	-	-	-	-		-	-	-	-	-	-	-	-	-	-
Aradu.A07	29037518		-	-	-	-	-	-	-	-	-	-	-	-	-	-	-	-	-	-	-	-	-		-	-	-	-	-	-	-	-	-	-
Aradu.A07	34314337		-	-	-	-	-	-	-	-	-	-	-	-	-	-	-	-	-	-	-	-	-		-	-	-	-	-	-	-	-	-	-
Aradu.A07	34519088		-	-	-	-	-	-	-	-	-	-	-	-	-	-	-	-	-	-	-	-	-		-	-	-	-	-	-	-	-	-	-
Aradu.A07	36655812		-	-	-	-	-	-	-	-	-	-	-	-	-	-	-	-	-	-	-	-	-		-	-	-	-	-	-	-	-	-	-
Aradu.A07	38770197		-	-	-	-	-	-	-	-	-	-	-	-	-	-	-	-	-	-	-	-	-		-	-	-	-	-	-	-	-	-	-
Aradu.A07	40722763		-	-	-	-	-	-	-	-	Sten1	-	-	-	-	-	-	-	-	-	-	-	-		-	-	-	-	-	-	-	-	-	-
Aradu.A07	49949867		-	-	-	-	-	-	-	-	-	-	-	-	-	-	-	-	-	-	-	-	-		-	-	-	-	-	-	-	-	-	-
Aradu.A07	53903274		-	-	-	-	-	-	-	-	-	-	-	-	-	-	-	-	-	-	-	-	-		-	-	-	-	-	-	-	-	-	-
Aradu.A07	53985964		-	-	-	-	-	-	-	-	Sten1	-	-	-	-	-	-	-	-	-	-	-	-		-	-	-	-	-	-	-	-	-	-
Aradu.A07	60064185		-	-	-	-	-	-	-	-	-	-	-	-	-	-	-	-	-	-	-	-	-		-	-	-	-	-	-	-	-	-	-
Aradu.A07	60217232		-	-	-	-	-	-	-	-	-	-	-	-	-	-	-	-	-	-	-	-	-		-	-	-	-	-	-	-	-	-	-
Aradu.A07	61354243		-	-	-	-	-	-	-	-	-	-	-	-	-	-	-	-	-	-	-	-	-		-	-	-	-	-	-	-	-	-	-
Aradu.A07	62398239		-	-	-	-	-	-	-	-	-	-	-	-	-	-	-	-	-	-	-	-	-		-	-	-	-	-	-	-	-	-	-
Aradu.A07	63185572		-	-	-	-	-	-	-	-	-	-	-	-	-	-	-	-	-	-	-	-	-		-	-	-	-	-	-	-	-	-	-
Aradu.A07	63674899		-	-	-	-	-	-	-	-	-	-	-	-	-	-	-	-	-	-	-	-	-		-	-	-	-	-	-	-	-	-	-
Aradu.A07	64213755		-	-	-	-	-	-	-	-	-	-	-	-	-	-	-	-	-	-	-	-	-		-	-	-	-	-	-	-	-	-	-
Aradu.A07	64335562		-	-	-	-	-	-	-	-	-	-	-	-	-	-	-	-	-	-	-	-	-		-	-	-	-	-	-	-	-	-	-
Aradu.A07	65413754		-	-	-	-	-	-	-	-	-	-	-	-	-	-	-	-	-	-	-	-	-		-	-	-	-	-	-	-	-	-	-
Aradu.A07	65957786		-	-	-	-	-	-	-	-	-	-	-	-	-	-	-	-	-	-	-	-	-		-	-	-	-	-	-	-	-	-	-
Aradu.A07	67162381		-	-	-	-	-	-	-	-	-	-	-	-	-	-	-	-	-	-	-	-	-		-	-	-	-	-	-	-	-	-	-
Aradu.A07	68943274		-	-	-	-	-	-	-	-	-	-	-	-	-	-	-	-	-	-	-	-	-		-	-	-	-	-	-	-	-	-	-
Aradu.A07	69596041		-	-	-	-	-	-	-	-	-	-	-	-	-	-	-	-	-	-	-	-	-		-	-	-	-	-	-	-	-	-	-
Aradu.A07	70123570		-	-	-	-	-	-	-	-	-	-	-	-	-	-	-	-	-	-	-	-	-		-	-	-	-	-	-	-	-	-	-
Aradu.A07	71054281		-	-	-	-	-	-	-	-	-	-	-	-	-	-	-	-	-	-	-	-	-		-	-	-	-	-	-	-	-	-	-
Aradu.A07	71124776		-	-	-	-	-	-	-	-	-	-	-	-	-	-	-	-	-	-	-	-	-		-	-	-	-	-	-	-	-	-	-
Aradu.A07	71387264		-	-	-	-	-	-	-	-	-	-	-	-	-	-	-	-	-	-	-	-	-		-	-	-	-	-	-	-	-	-	-
Aradu.A07	71736391		-	-	-	-	-	-	-	-	-	-	-	-	-	-	-	-	-	-	-	-	-		-	-	-	-	-	-	-	-	-	-
Aradu.A07	72094208		-	-	-	-	-	-	-	-	Sten1	-	-	-	-	-	-	-	-	-	-	-	-		-	-	-	-	-	-	-	-	-	-
Aradu.A07	72679285		-	-	-	-	-	-	-	-	-	-	-	-	-	-	-	-	-	-	-	-	-		-	-	-	-	-	-	-	-	-	-
Aradu.A07	74519999		-	-	-	-	-	-	-	-	-	-	-	-	-	-	-	-	-	-	-	-	-		-	-	-	-	-	-	-	-	-	-
Aradu.A07	75852917		-	-	-	-	-	-	-	-	-	-	-	-	-	-	-	-	-	-	-	-	-		-	-	-	-	-	-	-	-	-	-
Aradu.A07	76344679		-	-	-	-	-	-	-	-	-	-	-	-	-	-	-	-	-	-	-	-	-		-	-	-	-	-	-	-	-	-	-
Aradu.A07	77607168		-	-	-	-	-	-	-	-	-	-	-	-	-	-	-	-	-	-	-	-	-		-	-	-	-	-	-	-	-	-	-
Aradu.A08	1891349		-	-	-	-	-	-	-	-	-	-	-	-	-	-	-	-	-	-	-	-	-		-	-	-	-	-	-	-	-	-	-
Aradu.A08	2880609		-	-	-	-	-	-	-	-	-	-	-	-	-	-	-	-	-	-	-	-	-		-	-	-	-	-	-	-	-	-	-
Aradu.A08	2897351		-	-	-	-	-	-	-	-	-	-	-	-	-	-	-	-	-	-	-	-	-		-	-	-	-	-	-	-	-	-	-
Aradu.A08	3402445		-	-	-	-	-	-	-	-	-	-	-	-	-	-	-	-	-	-	-	-	-		-	-	-	-	-	-	-	-	-	-
Aradu.A08	4139896		-	-	-	-	-	-	-	-	-	-	-	-	-	-	-	-	-	-	-	-	-		-	-	-	-	-	-	-	-	-	-
Aradu.A08	4406711		-	-	-	-	-	-	-	-	-	-	-	-	-	-	-	-	-	-	-	-	-		-	-	-	-	-	-	-	-	-	-
Aradu.A08	4440864		-	-	-	-	-	-	-	-	-	-	-	-	-	-	-	-	-	-	-	-	-		-	-	-	-	-	-	-	-	-	-
Aradu.A08	4910322		-	-	-	-	-	-	-	-	-	-	-	-	-	-	-	-	-	-	-	-	-		-	-	-	-	-	-	-	-	-	-
Aradu.A08	4968179		-	-	-	-	-	-	-	-	-	-	-	-	-	-	-	-	-	-	-	-	-		-	-	-	-	-	-	-	-	-	-
Aradu.A08	4968243		-	-	-	-	-	-	-	-	-	-	-	-	-	-	-	-	-	-	-	-	-		-	-	-	-	-	-	-	-	-	-
Aradu.A08	5355456		-	-	-	-	-	-	-	-	Sten1	-	-	-	-	-	-	-	-	-	-	-	-		-	-	-	-	-	-	-	-	-	-
Aradu.A08	5424773		-	-	-	-	-	-	-	-	-	-	-	-	-	-	-	-	-	-	-	-	-		-	-	-	-	-	-	-	-	-	-
Aradu.A08	5572280		-	-	-	-	-	-	-	-	-	-	-	-	-	-	-	-	-	-	-	-	-		-	-	-	-	-	-	-	-	-	-
Aradu.A08	5572430		-	-	-	-	-	-	-	-	-	-	-	-	-	-	-	-	-	-	-	-	-		-	-	-	-	-	-	-	-	-	-
Aradu.A08	6355810		-	-	-	-	-	-	-	-	-	-	-	-	-	-	-	-	-	-	-	-	-		-	-	-	-	-	-	-	-	-	-
Aradu.A08	6866736		-	-	-	-	-	-	-	-	-	-	-	-	-	-	-	-	-	-	-	-	-		-	-	-	-	-	-	-	-	-	-
Aradu.A08	8571791		-	-	-	-	-	-	-	-	-	-	-	-	-	-	-	-	-	-	-	-	-		-	-	-	-	-	-	-	-	-	-
Aradu.A08	8857956		-	-	-	-	-	-	-	-	-	-	-	-	-	-	-	-	-	-	-	-	-		-	-	-	-	-	-	-	-	-	-
Aradu.A08	8966026		-	-	-	-	-	-	-	-	-	-	-	-	-	-	-	-	-	-	-	-	-		-	-	-	-	-	-	-	-	-	-
Aradu.A08	9220360		-	-	-	-	-	-	-	-	-	-	-	-	-	-	-	-	-	-	-	-	-		-	-	-	-	-	-	-	-	-	-
Aradu.A08	9346039		-	-	-	-	-	-	-	-	-	-	-	-	-	-	-	-	-	-	-	-	-		-	-	-	-	-	-	-	-	-	-
Aradu.A08	10011940		-	-	-	-	-	-	-	-	-	-	-	-	-	-	-	-	-	-	-	-	-		-	-	-	-	-	-	-	-	-	-
Aradu.A08	10248663		-	-	-	-	-	-	-	-	-	-	-	-	-	-	-	-	-	-	-	-	-		-	-	-	-	-	-	-	-	-	-
Aradu.A08	10906698		-	-	-	-	-	-	-	-	-	-	-	-	-	-	-	-	-	-	-	-	-		-	-	-	-	-	-	-	-	-	-
Aradu.A08	11067219		-	-	-	-	-	-	-	-	-	-	-	-	-	-	-	-	-	-	-	-	-		-	-	-	-	-	-	-	-	-	-
Aradu.A08	11536813		-	-	-	-	-	-	-	-	-	-	-	-	-	-	-	-	-	-	-	-	-		-	-	-	-	-	-	-	-	-	-
Aradu.A08	11713918		-	-	-	-	-	-	-	-	-	-	-	-	-	-	-	-	-	-	-	-	-		-	-	-	-	-	-	-	-	-	-
Aradu.A08	12093185		-	-	-	-	-	-	-	-	-	-	-	-	-	-	-	-	-	-	-	-	-		-	-	-	-	-	-	-	-	-	-
Aradu.A08	12912372		-	-	-	-	-	-	-	-	-	-	-	-	-	-	-	-	-	-	-	-	-		-	-	-	-	-	-	-	-	-	-
Aradu.A08	14297495		-	-	-	-	-	-	-	-	-	-	-	-	-	-	-	-	-	-	-	-	-		-	-	-	-	-	-	-	-	-	-
Aradu.A08	15036606		-	-	-	-	-	-	-	-	-	-	-	-	-	-	-	-	-	-	-	-	-		-	-	-	-	-	-	-	-	-	-
Aradu.A08	15257443		-	-	-	-	-	-	-	-	-	-	-	-	-	-	-	-	-	-	-	-	-		-	-	-	-	-	-	-	-	-	-
Aradu.A08	15258018		-	-	-	-	-	-	-	-	-	-	-	-	-	-	-	-	-	-	-	-	-		-	-	-	-	-	-	-	-	-	-
Aradu.A08	15660388		-	-	-	-	-	-	-	-	-	-	-	-	-	-	-	-	-	-	-	-	-		-	-	-	-	-	-	-	-	-	-
Aradu.A08	15977007		-	-	-	-	-	-	-	-	-	-	-	-	-	-	-	-	-	-	-	-	-		-	-	-	-	-	-	-	-	-	-
Aradu.A08	16544284		-	-	-	-	-	-	-	-	-	-	-	-	-	-	-	-	-	-	-	-	-		-	-	-	-	-	-	-	-	-	-
Aradu.A08	16894853		-	-	-	-	-	-	-	-	-	-	-	-	-	-	-	-	-	-	-	-	-		-	-	-	-	-	-	-	-	-	-
Aradu.A08	17706521		-	-	-	-	-	-	-	-	-	-	-	-	-	-	-	-	-	-	-	-	-		-	-	-	-	-	-	-	-	-	-
Aradu.A08	17707100		-	-	-	-	-	-	-	-	-	-	-	-	-	-	-	-	-	-	-	-	-		-	-	-	-	-	-	-	-	-	-
Aradu.A08	23241307		-	-	-	-	-	-	-	-	-	-	-	-	-	-	-	-	-	-	-	-	-		-	-	-	-	-	-	-	-	-	-
Aradu.A08	24424438		-	-	-	-	-	-	-	-	-	-	-	-	-	-	-	-	-	-	-	-	-		-	-	-	-	-	-	-	-	-	-
Aradu.A08	24455849		-	-	-	-	-	-	-	-	-	-	-	-	-	-	-	-	-	-	-	-	-		-	-	-	-	-	-	-	-	-	-
Aradu.A08	24793059		-	-	-	-	-	-	-	-	-	-	-	-	-	-	-	-	-	-	-	-	-		-	-	-	-	-	-	-	-	-	-
Aradu.A08	25003355		-	-	-	-	-	-	-	-	-	-	-	-	-	-	-	-	-	-	-	-	-		-	-	-	-	-	-	-	-	-	-
Aradu.A08	25082727		-	-	-	-	-	-	-	-	-	-	-	-	-	-	-	-	-	-	-	-	-		-	-	-	-	-	-	-	-	-	-
Aradu.A08	25180600		-	-	-	-	-	-	-	-	-	-	-	-	-	-	-	-	-	-	-	-	-		-	-	-	-	-	-	-	-	-	-
Aradu.A08	25222189		-	-	-	-	-	-	-	-	-	-	-	-	-	-	-	-	-	-	-	-	-		-	-	-	-	-	-	-	-	-	-
Aradu.A08	25527288		-	-	-	-	-	-	-	-	-	-	-	-	-	-	-	-	-	-	-	-	-		-	-	-	-	-	-	-	-	-	-
Aradu.A08	25870941		-	-	-	-	-	-	-	-	-	-	-	-	-	-	-	-	-	-	-	-	-		-	-	-	-	-	-	-	-	-	-
Aradu.A08	26344960		-	-	-	-	-	-	-	-	-	-	-	-	-	-	-	-	-	-	-	-	-		-	-	-	-	-	-	-	-	-	-
Aradu.A08	26553699		-	-	-	-	-	-	-	-	-	-	-	-	-	-	-	-	-	-	-	-	-		-	-	-	-	-	-	-	-	-	-
Aradu.A08	27221774		-	-	-	-	-	-	-	-	-	-	-	-	-	-	-	-	-	-	-	-	-		-	-	-	-	-	-	-	-	-	-
Aradu.A08	27498253		-	-	-	-	-	-	-	-	-	-	-	-	-	-	-	-	-	-	-	-	-		-	-	-	-	-	-	-	-	-	-
Aradu.A08	27581360		-	-	-	-	-	-	-	-	-	-	-	-	-	-	-	-	-	-	-	-	-		-	-	-	-	-	-	-	-	-	-
Aradu.A08	29019016		-	-	-	-	-	-	-	-	-	-	-	-	-	-	-	-	-	-	-	-	-		-	-	-	-	-	-	-	-	-	-
Aradu.A08	29642173		-	-	-	-	-	-	-	-	-	-	-	-	-	-	-	-	-	-	-	-	-		-	-	-	-	-	-	-	-	-	-
Aradu.A08	29666660		-	-	-	-	-	-	-	-	-	-	-	-	-	-	-	-	-	-	-	-	-		-	-	-	-	-	-	-	-	-	-
Aradu.A08	31537551		-	-	-	-	-	-	-	-	-	-	-	-	-	-	-	-	-	-	-	-	-		-	-	-	-	-	-	-	-	-	-
Aradu.A08	32566261		-	-	-	-	-	-	-	-	-	-	-	-	-	-	-	-	-	-	-	-	-		-	-	-	-	-	-	-	-	-	-
Aradu.A08	33888067		-	-	-	-	-	-	-	-	Sten1	-	-	-	-	-	-	-	-	-	-	-	-		-	-	-	-	-	-	-	-	-	-
Aradu.A08	34545244		-	-	-	-	-	-	-	-	-	-	-	-	-	-	-	-	-	-	-	-	-		-	-	-	-	-	-	-	-	-	-
Aradu.A08	35429851		-	-	-	-	-	-	-	-	-	-	-	-	-	-	-	-	-	-	-	-	-		-	-	-	-	-	-	-	-	-	-
Aradu.A08	37475975		-	-	-	-	-	-	-	-	-	-	-	-	-	-	-	-	-	-	-	-	-		-	-	-	-	-	-	-	-	-	-
Aradu.A08	38153059		-	-	-	-	-	-	-	-	-	-	-	-	-	-	-	-	-	-	-	-	-		-	-	-	-	-	-	-	-	-	-
Aradu.A08	38180605		-	-	-	-	-	-	-	-	-	-	-	-	-	-	-	-	-	-	-	-	-		-	-	-	-	-	-	-	-	-	-
Aradu.A08	38254290		-	-	-	-	-	-	-	-	-	-	-	-	-	-	-	-	-	-	-	-	-		-	-	-	-	-	-	-	-	-	-
Aradu.A08	38319070		-	-	-	-	-	-	-	-	-	-	-	-	-	-	-	-	-	-	-	-	-		-	-	-	-	-	-	-	-	-	-
Aradu.A08	38356674		-	-	-	-	-	-	-	-	-	-	-	-	-	-	-	-	-	-	-	-	-		-	-	-	-	-	-	-	-	-	-
Aradu.A08	38565960		-	-	-	-	-	-	-	-	-	-	-	-	-	-	-	-	-	-	-	-	-		-	-	-	-	-	-	-	-	-	-
Aradu.A08	39171433		-	-	-	-	-	-	-	-	-	-	-	-	-	-	-	-	-	-	-	-	-		-	-	-	-	-	-	-	-	-	-
Aradu.A08	39208957		-	-	-	-	-	-	-	-	-	-	-	-	-	-	-	-	Sten1	-	-	-	-		-	-	-	-	-	-	-	-	-	-
Aradu.A08	39262422		-	-	-	-	-	-	-	-	-	-	-	-	-	-	-	-	-	-	-	-	-		-	-	-	-	-	-	-	-	-	-
Aradu.A08	40053900		-	-	-	-	-	-	-	-	-	-	-	-	-	-	-	-	-	-	-	-	-		-	-	-	-	-	-	-	-	-	-
Aradu.A08	40886460		-	-	-	-	-	-	-	-	-	-	-	-	-	-	-	-	-	-	-	-	-		-	-	-	-	-	-	-	-	-	-
Aradu.A08	41498901		-	-	-	-	-	-	-	-	-	-	-	-	-	-	-	-	-	-	-	-	-		-	-	-	-	-	-	-	-	-	-
Aradu.A08	42383674		-	-	-	-	-	-	-	-	-	-	-	-	-	-	-	-	-	-	-	-	-		-	-	-	-	-	-	-	-	-	-
Aradu.A08	43354782		-	-	-	-	-	-	-	-	-	-	-	-	-	-	-	-	-	-	-	-	-		-	-	-	-	-	-	-	-	-	-
Aradu.A08	43472087		Sten1	-	-	Sten1	Sten1	-	-	-	-	-	-	-	-	Sten1	-	Sten1	-	-	Sten1	Sten1	-		-	-	-	Sten1	Sten1	-	-	-	-	-
Aradu.A08	44987016		-	-	-	-	-	-	-	-	-	-	-	-	-	-	-	-	-	-	-	-	-		-	-	-	-	-	-	-	-	-	-
Aradu.A08	45750189		-	-	-	-	-	-	-	-	-	-	-	-	-	-	-	-	-	-	-	-	-		-	-	-	-	-	-	-	-	-	-
Aradu.A08	46433006		-	-	-	-	-	-	-	-	-	-	-	-	-	-	-	-	-	-	-	-	-		-	-	-	-	-	-	-	-	-	-
Aradu.A08	47378713		-	-	-	-	-	-	-	-	-	-	-	-	-	-	-	-	-	Sten1	-	-	-		-	-	-	-	-	-	-	-	-	-
Aradu.A08	48256544		-	-	-	-	-	-	-	-	-	-	-	-	-	-	-	-	-	-	-	-	-		-	-	-	-	-	-	-	-	-	-
Aradu.A09	367305		-	-	-	-	-	-	-	-	-	-	-	-	-	-	-	-	-	-	-	-	-		-	-	-	-	-	-	-	-	-	-
Aradu.A09	550898		-	-	-	-	-	-	-	-	-	-	-	-	-	-	-	-	-	-	-	-	-		-	-	-	-	-	-	-	-	-	-
Aradu.A09	1992408		-	-	-	-	-	-	-	-	-	-	-	-	-	-	-	-	-	-	-	-	-		-	-	-	-	-	-	-	-	-	-
Aradu.A09	2216924		-	-	-	-	-	-	-	-	-	-	-	-	-	-	-	-	-	-	-	-	-		-	-	-	-	-	-	-	-	-	-
Aradu.A09	3427133		-	-	-	-	-	-	-	-	-	-	-	-	-	-	-	-	-	-	-	-	-		-	-	-	-	-	-	-	-	-	-
Aradu.A09	4656815		-	-	-	-	-	-	-	-	-	-	-	-	-	-	-	-	-	-	-	-	-		-	-	-	-	-	-	-	-	-	-
Aradu.A09	5066191		-	-	-	-	-	-	-	-	-	-	-	-	-	-	-	-	-	-	-	-	-		-	-	-	-	-	-	-	-	-	-
Aradu.A09	6846409		-	-	-	-	-	-	-	-	-	-	-	-	-	-	-	-	-	-	-	-	-		-	-	-	-	-	-	-	-	-	-
Aradu.A09	7750844		-	-	-	-	-	-	-	-	-	-	-	-	-	-	-	-	-	-	-	-	-		-	-	-	-	-	-	-	-	-	-
Aradu.A09	7755946		-	-	-	-	-	-	-	-	-	-	-	-	-	-	-	-	-	-	-	-	-		-	-	-	-	-	-	-	-	-	-
Aradu.A09	8267184		Sten1	Sten1	-	Sten1	Sten1	Sten1	Sten1	Sten1	Sten1	Sten1	Sten1	Sten1	Sten1	Sten1	Sten1	-	Sten1	Sten1	-	Sten1	Sten1		-	Sten1	Sten1	Sten1	Sten2	Sten1	Sten2	Sten1	-	Sten1
Aradu.A09	8661916		Sten1	Sten1	-	Sten1	Sten1	Sten1	Sten1	Sten1	-	Sten1	Sten1	Sten1	Sten1	Sten1	Sten1	-	Sten1	-	-	Sten1	Sten1		-	Sten1	Sten1	Sten1	Sten1	Sten1	Sten1	Sten1	Sten1	Sten1
Aradu.A09	9827232		-	-	-	-	-	-	-	-	-	-	-	-	-	-	-	-	-	-	-	-	-		-	-	-	-	-	-	-	-	-	-
Aradu.A09	11803325		-	-	-	-	-	-	-	-	-	-	-	-	-	-	-	-	-	-	-	-	-		-	-	-	-	-	-	-	-	-	-
Aradu.A09	12546411		Sten1	-	-	-	-	Sten1	-	Sten1	-	-	Sten1	-	-	-	-	-	-	-	Sten1	Sten1	-		-	-	-	-	-	-	-	-	-	-
Aradu.A09	13120048		-	-	-	-	-	-	-	-	-	-	-	-	-	-	-	-	-	-	-	-	-		-	-	-	-	-	-	-	-	-	-
Aradu.A09	14150363		-	-	-	-	-	-	-	-	-	-	-	-	-	-	-	-	-	-	-	-	-		-	-	-	-	-	-	-	-	-	-
Aradu.A09	14385410		-	-	-	-	-	-	-	-	-	-	-	-	-	-	-	-	-	-	-	-	-		-	-	-	-	-	-	-	-	-	-
Aradu.A09	15225814		-	-	-	-	-	-	-	-	-	-	-	-	-	-	-	-	-	-	-	-	-		-	-	-	-	-	-	-	-	-	-
Aradu.A09	15594442		-	-	-	-	-	-	-	-	-	-	-	-	-	-	-	-	-	-	-	-	-		-	-	-	-	-	-	-	-	-	-
Aradu.A09	16516448		-	-	-	-	-	-	-	-	-	-	-	-	-	-	-	-	-	-	-	-	-		-	-	-	-	-	-	-	-	-	-
Aradu.A09	16570254		-	-	-	-	-	-	-	-	-	-	-	-	-	-	-	-	-	-	-	-	-		-	-	-	-	-	-	-	-	-	-
Aradu.A09	17033486		-	-	-	-	-	-	-	-	-	-	-	-	-	-	-	-	-	-	-	-	-		-	-	-	-	-	-	-	-	-	-
Aradu.A09	20412728		-	-	-	-	-	-	-	-	-	-	-	-	-	-	-	-	-	-	-	-	-		-	-	-	-	-	-	-	-	-	-
Aradu.A09	20416585		-	-	-	-	-	-	-	-	-	-	-	-	-	-	-	-	-	-	-	-	-		-	-	-	-	-	-	-	-	-	-
Aradu.A09	20677308		-	-	-	-	-	-	-	-	-	-	-	-	-	-	-	-	-	-	-	-	-		-	-	-	-	-	-	-	-	-	-
Aradu.A09	22108990		-	-	-	-	-	-	-	-	-	-	-	-	-	-	-	-	-	-	-	-	-		-	-	-	-	-	-	-	-	-	-
Aradu.A09	28144250		-	-	-	-	-	-	-	-	-	-	-	-	-	-	-	-	-	-	-	-	-		-	-	-	-	-	-	-	-	-	-
Aradu.A09	30827063		-	-	-	-	-	-	-	-	-	-	-	-	-	-	-	-	-	-	-	-	-		-	-	-	-	-	-	-	-	-	-
Aradu.A09	32582881		-	-	-	-	-	-	-	-	-	-	-	-	-	-	-	-	-	-	-	-	-		-	-	-	-	-	-	-	-	-	-
Aradu.A09	35915325		-	-	-	-	-	-	-	-	-	-	-	-	-	-	-	-	-	-	-	-	-		-	-	-	-	-	-	-	-	-	-
Aradu.A09	45820821		-	-	-	-	-	-	-	-	-	-	-	-	-	-	-	-	-	-	-	-	-		-	-	-	-	-	-	-	-	-	-
Aradu.A09	46721425		-	-	-	-	-	-	-	-	-	-	-	-	-	-	-	-	-	-	-	-	-		-	-	-	-	-	-	-	-	-	-
Aradu.A09	47363859		-	-	-	-	-	-	-	-	-	-	-	-	-	-	-	-	-	-	-	-	-		-	-	-	-	-	-	-	-	-	-
Aradu.A09	48224918		-	-	-	-	-	-	-	-	-	-	-	-	-	-	-	-	-	-	-	-	-		-	-	-	-	-	-	-	-	-	-
Aradu.A09	53409504		-	-	-	-	-	-	-	-	-	-	-	-	-	-	-	-	-	-	-	-	-		-	-	-	-	-	-	-	-	-	-
Aradu.A09	73198747		-	-	-	-	-	-	-	-	-	-	-	-	-	-	-	-	-	-	-	-	-		-	-	-	-	-	-	-	-	-	-
Aradu.A09	74776697		-	-	-	-	-	-	-	-	-	-	-	-	-	-	-	-	-	-	-	-	-		-	-	-	-	-	-	-	-	-	-
Aradu.A09	80240197		-	-	-	-	-	-	-	-	-	-	-	-	-	-	-	-	-	Sten1	-	-	-		-	-	-	-	-	-	-	-	-	-
Aradu.A09	82366437		-	-	-	-	-	-	-	-	-	-	-	-	-	-	-	-	-	-	-	-	-		-	-	-	-	-	-	-	-	-	-
Aradu.A09	91548071		-	-	-	-	-	-	-	-	-	-	-	-	-	-	-	-	-	-	-	-	-		-	-	-	-	-	-	-	-	-	-
Aradu.A09	93135689		-	-	-	-	-	-	-	-	-	-	-	-	-	-	-	-	-	-	-	-	-		-	-	-	-	-	-	-	-	-	-
Aradu.A09	94328792		-	-	-	-	-	-	-	-	-	-	-	-	-	-	-	-	-	-	-	-	-		-	-	-	-	-	-	-	-	-	-
Aradu.A09	97879279		-	-	-	-	-	-	-	-	-	-	-	-	-	-	-	-	-	-	-	-	-		-	-	-	-	-	-	-	-	-	-
Aradu.A09	100203544		-	-	-	-	-	-	-	-	-	-	-	-	-	-	-	-	-	-	-	-	-		-	-	-	-	-	-	-	-	-	-
Aradu.A09	100681800		-	-	-	-	-	-	-	-	-	-	-	-	-	-	-	-	-	-	-	-	-		-	-	-	-	-	-	-	-	-	-
Aradu.A09	104608380		-	-	-	-	-	-	-	-	-	-	-	-	-	-	-	-	-	-	-	-	-		-	-	-	-	-	-	-	-	-	-
Aradu.A09	104624029		-	-	-	-	-	-	-	-	-	-	-	-	-	-	-	-	-	-	-	-	-		-	-	-	-	-	-	-	-	-	-
Aradu.A09	106100105		-	-	-	-	-	-	-	-	-	-	-	-	-	-	-	-	-	-	-	-	-		-	-	-	-	-	-	-	-	-	-
Aradu.A09	108869870		-	-	-	-	-	-	-	-	-	-	-	-	-	-	-	-	-	-	-	-	-		-	-	-	-	-	-	-	-	-	-
Aradu.A09	108905759		-	-	-	-	-	-	-	-	-	-	-	-	-	-	-	-	-	-	-	-	-		-	-	-	-	-	-	-	-	-	-
Aradu.A09	109699138		-	-	-	-	-	-	-	-	-	-	-	-	-	-	-	-	-	-	-	-	-		-	-	-	-	-	-	-	-	-	-
Aradu.A09	109977568		-	-	-	-	-	-	-	-	-	-	-	-	-	-	-	-	-	-	-	-	-		-	-	-	-	-	-	-	-	-	-
Aradu.A09	111972500		-	-	-	-	-	-	-	-	-	-	-	-	-	-	-	-	-	-	-	-	-		-	-	-	-	-	-	-	-	-	-
Aradu.A09	112245541		-	-	-	-	-	-	-	-	-	-	-	-	-	-	-	-	-	-	-	-	-		-	-	-	-	-	-	-	-	-	-
Aradu.A09	112528532		-	-	-	-	-	-	-	-	-	-	-	-	-	-	-	-	-	-	-	-	-		-	-	-	-	-	-	-	-	-	-
Aradu.A09	113662882		-	-	-	-	-	-	-	-	-	-	-	-	-	-	-	-	-	-	-	-	-		-	-	-	-	-	-	-	-	-	-
Aradu.A09	113714863		-	-	-	-	-	-	-	-	-	-	-	-	-	-	-	-	-	-	-	-	-		-	-	-	-	-	-	-	-	-	-
Aradu.A09	113715433		-	-	-	-	-	-	-	-	-	-	-	-	-	-	-	-	-	-	-	-	-		-	-	-	-	-	-	-	-	-	-
Aradu.A09	114515959		-	-	-	-	-	-	-	-	-	-	-	-	-	-	-	-	-	-	-	-	-		-	-	-	-	-	-	-	-	-	-
Aradu.A09	115268602		-	-	-	-	-	-	-	-	-	-	-	-	-	-	-	-	-	-	-	-	-		-	-	-	-	-	-	-	-	-	-
Aradu.A09	115524842		-	-	-	-	-	-	-	-	-	-	-	-	-	-	-	-	-	-	-	-	-		-	-	-	-	-	-	-	-	-	-
Aradu.A09	116087388		-	-	-	-	-	-	-	-	-	-	-	-	-	-	-	-	-	-	-	-	-		-	-	-	-	-	-	-	-	-	-
Aradu.A09	116264687		-	-	-	-	-	-	-	-	-	-	-	-	-	-	-	-	-	-	-	-	-		-	-	-	-	-	-	-	-	-	-
Aradu.A09	116627090		-	-	-	-	-	-	-	-	-	-	-	-	-	-	-	-	-	-	-	-	-		-	-	-	-	-	-	-	-	-	-
Aradu.A09	116748829		-	-	-	-	-	-	-	-	-	-	-	-	-	-	-	-	-	-	-	-	-		-	-	-	-	-	-	-	-	-	-
Aradu.A09	118577665		-	-	-	-	-	-	-	-	-	-	-	-	-	-	-	-	-	-	-	-	-		-	-	-	-	-	-	-	-	-	-
Aradu.A09	118682014		-	-	-	-	-	-	-	-	-	-	-	-	-	-	-	-	-	-	-	-	-		-	-	-	-	-	-	-	-	-	-
Aradu.A09	120424102		-	-	-	-	-	-	-	-	-	-	-	-	-	-	-	-	-	-	-	-	-		-	-	-	-	-	-	-	-	-	-
Aradu.A10	373630		-	-	-	-	-	-	-	-	-	-	-	-	-	-	-	-	-	-	-	-	-		-	-	-	-	-	-	-	-	-	-
Aradu.A10	694007		-	-	-	-	-	-	-	-	-	-	-	-	-	-	-	-	-	-	-	-	-		-	-	-	-	-	-	-	-	-	-
Aradu.A10	980256		-	-	-	-	-	-	-	-	-	-	-	-	-	-	-	-	-	-	-	-	-		-	-	-	-	-	-	-	-	-	-
Aradu.A10	1835586		-	-	-	-	-	-	-	-	-	-	-	-	-	-	-	-	-	-	-	-	-		-	-	-	-	-	-	-	-	-	-
Aradu.A10	2323344		-	-	-	-	-	-	-	-	-	-	-	-	-	-	-	-	-	-	-	-	-		-	-	-	-	-	-	-	-	-	-
Aradu.A10	2422728		-	-	-	-	-	-	-	-	-	-	-	-	-	-	-	-	-	-	-	-	-		-	-	-	-	-	-	-	-	-	-
Aradu.A10	2717231		-	-	-	-	-	-	-	-	-	-	-	-	-	-	-	-	-	-	-	-	-		-	-	-	-	-	-	-	-	-	-
Aradu.A10	2883328		-	-	-	-	-	-	-	-	-	-	-	-	-	-	-	-	-	-	-	-	-		-	-	-	-	-	-	-	-	-	-
Aradu.A10	3689273		-	-	-	-	-	-	-	-	-	-	-	-	-	-	-	-	-	-	-	-	-		-	-	-	-	-	-	-	-	-	-
Aradu.A10	4293421		-	-	-	-	-	-	-	-	-	-	-	-	-	-	-	-	-	-	-	-	-		-	-	-	-	-	-	-	-	-	-
Aradu.A10	4951877		-	-	-	-	-	-	-	-	-	-	-	-	-	-	-	-	-	-	-	-	-		-	-	-	-	-	-	-	-	-	-
Aradu.A10	5737111		-	-	-	-	-	-	-	-	-	-	-	-	-	-	-	-	-	-	-	-	-		-	-	-	-	-	-	-	-	-	-
Aradu.A10	5811384		-	-	-	-	-	-	-	-	-	-	-	-	-	-	-	-	-	-	-	-	-		-	-	-	-	-	-	-	-	-	-
Aradu.A10	5845928		-	-	-	-	-	-	-	-	-	-	-	-	-	-	-	-	-	-	-	-	-		-	-	-	-	-	-	-	-	-	-
Aradu.A10	5963482		-	-	-	-	-	-	-	-	-	-	-	-	-	-	-	-	-	-	-	-	-		-	-	-	-	-	-	-	-	-	-
Aradu.A10	6103331		-	-	-	-	-	-	-	-	-	-	-	-	-	-	-	-	-	-	-	-	-		-	-	-	-	-	-	-	-	-	-
Aradu.A10	6584647		-	-	-	-	-	-	-	-	-	-	-	-	-	-	-	-	-	-	-	-	-		-	-	-	-	-	-	-	-	-	-
Aradu.A10	6782100		-	-	-	-	-	-	-	-	-	-	-	-	-	-	-	-	-	-	-	-	-		-	-	-	-	-	-	-	-	-	-
Aradu.A10	6784617		-	-	-	-	-	-	-	-	-	-	-	-	-	-	-	-	-	-	-	-	-		-	-	-	-	-	-	-	-	-	-
Aradu.A10	7984682		Sten1	Sten1	Sten1	Sten1	Sten1	Sten1	Sten1	Sten1	Sten1	Sten1	Sten1	Sten1	Sten1	Sten1	Sten1	Sten1	Sten1	Sten1	Sten1	Sten1	Sten1		Sten2	Sten1	Sten1	Sten2	-	Sten1	Sten2	Sten2	Sten1	-
Aradu.A10	10447114		-	-	-	-	-	-	-	-	-	-	-	-	-	-	-	-	-	-	-	-	-		-	-	-	-	-	-	-	-	-	-
Aradu.A10	10641881		-	-	-	-	-	-	-	-	-	-	-	-	-	-	-	-	-	-	-	-	-		-	-	-	-	-	-	-	-	-	-
Aradu.A10	12933320		-	-	-	-	-	-	-	-	-	-	-	-	-	-	-	-	-	-	-	-	-		-	-	-	-	-	-	-	-	-	-
Aradu.A10	14089200		-	-	-	-	-	-	-	-	-	-	-	-	-	-	-	-	-	-	-	-	-		-	-	-	-	-	-	-	-	-	-
Aradu.A10	18066033		Sten2	-	-	Sten2	Sten1	Sten1	-	-	Sten1	-	-	-	-	-	-	Sten2	-	-	Sten2	Sten2	-		Sten1	Sten1	-	Sten1	Sten2	-	Sten1	Sten1	Sten2	Sten1
Aradu.A10	20471486		-	-	-	-	-	-	-	-	-	-	-	-	-	-	-	-	-	-	-	-	-		-	-	-	-	-	-	-	-	-	-
Aradu.A10	21109953		-	-	-	-	-	-	-	-	-	-	-	-	-	-	-	-	-	-	-	-	-		-	-	-	-	-	-	-	-	-	-
Aradu.A10	22008568		-	-	-	-	-	-	-	-	-	-	-	-	-	-	-	-	-	-	-	-	-		-	-	-	-	-	-	-	-	-	-
Aradu.A10	23775310		-	-	-	-	-	-	-	-	-	-	-	-	-	-	-	-	-	-	-	-	-		-	-	-	-	-	-	-	-	-	-
Aradu.A10	30388204		-	-	-	-	-	-	-	-	-	-	-	-	-	-	-	-	-	-	-	-	-		-	-	-	-	-	-	-	-	-	-
Aradu.A10	32581656		-	-	-	-	-	-	-	-	-	-	-	-	-	-	-	-	-	-	-	-	-		-	-	-	-	-	-	-	-	-	-
Aradu.A10	34514348		-	-	-	-	-	-	-	-	-	-	-	-	-	-	-	-	-	-	-	-	-		-	-	-	-	-	-	-	-	-	-
Aradu.A10	41521076		-	-	-	-	-	-	-	-	-	-	-	-	-	-	-	-	-	-	-	-	-		-	-	-	-	-	-	-	-	-	-
Aradu.A10	43890839		-	-	-	-	-	-	-	-	-	-	-	-	-	-	-	-	-	-	-	-	-		-	-	-	-	-	-	-	-	-	-
Aradu.A10	46982226		-	-	-	-	-	-	-	-	-	-	-	-	-	-	-	-	-	-	-	-	-		-	-	-	-	-	-	-	-	-	-
Aradu.A10	49445399		-	-	-	-	-	-	-	-	-	-	-	-	-	-	-	-	-	-	-	-	-		-	-	-	-	-	-	-	-	-	-
Aradu.A10	53546174		-	-	-	-	-	-	-	-	-	-	-	-	-	-	-	-	-	-	-	-	-		-	-	-	-	-	-	-	-	-	-
Aradu.A10	57142266		Sten2	-	-	Sten2	Sten1	Sten1	-	-	Sten1	-	-	-	-	-	-	Sten2	-	-	Sten2	Sten2	-		Sten1	Sten1	-	Sten1	Sten2	-	Sten1	Sten1	Sten2	Sten1
Aradu.A10	57722566		-	-	-	-	-	-	-	-	-	-	-	-	-	-	-	-	-	-	-	-	-		-	-	-	-	-	-	-	-	-	-
Aradu.A10	58678659		-	-	-	-	-	-	-	-	-	-	-	-	-	-	-	-	-	-	-	-	-		-	-	-	-	-	-	-	-	-	-
Aradu.A10	62593623		-	-	-	-	-	-	-	-	-	-	-	-	-	-	-	-	-	-	-	-	-		-	-	-	-	-	-	-	-	-	-
Aradu.A10	64894125		-	-	-	-	-	-	-	-	-	-	-	-	-	-	-	-	-	-	-	-	-		-	-	-	-	-	-	-	-	-	-
Aradu.A10	67383026		-	-	-	-	-	-	-	-	-	-	-	-	-	-	-	-	-	-	-	-	-		-	-	-	-	-	-	-	-	-	-
Aradu.A10	67722120		-	-	-	-	-	-	-	-	Sten1	-	-	-	-	-	-	-	-	-	-	-	-		-	-	-	-	-	-	-	-	-	-
Aradu.A10	68628266		-	-	-	-	-	-	-	-	-	-	-	-	-	-	-	-	-	-	-	-	-		-	-	-	-	-	-	-	-	-	-
Aradu.A10	70934631		-	-	-	-	-	-	-	-	-	-	-	-	-	-	-	-	-	-	-	-	-		-	-	-	-	-	-	-	-	-	-
Aradu.A10	71034744		-	-	-	-	-	-	-	-	-	-	-	-	-	-	-	-	-	-	-	-	-		-	-	-	-	-	-	-	-	-	-
Aradu.A10	75427804		-	-	-	-	-	-	-	-	-	-	-	-	-	-	-	-	-	-	-	-	-		-	-	-	-	-	-	-	-	-	-
Aradu.A10	83313579		-	-	-	-	-	-	-	-	-	-	-	-	-	-	-	-	-	-	-	-	-		-	-	-	-	-	-	-	-	-	-
Aradu.A10	84012900		-	-	-	-	-	-	-	-	-	-	-	-	-	-	-	-	-	-	-	-	-		-	-	-	-	-	-	-	-	-	-
Aradu.A10	84240906		-	-	-	-	-	-	-	-	-	-	-	-	-	-	-	-	-	-	-	-	-		-	-	-	-	-	-	-	-	-	-
Aradu.A10	85184155		-	-	-	-	-	-	-	-	-	-	-	-	-	-	-	-	-	-	-	-	-		-	-	-	-	-	-	-	-	-	-
Aradu.A10	85297113		-	-	-	-	-	-	-	-	-	-	-	-	-	-	-	-	-	-	-	-	-		-	-	-	-	-	-	-	-	-	-
Aradu.A10	87705205		-	-	-	-	-	-	-	-	-	-	-	-	-	-	-	-	-	-	-	-	-		-	-	-	-	-	-	-	-	-	-
Aradu.A10	87711827		-	-	-	-	-	-	-	-	-	-	-	-	-	-	-	-	-	-	-	-	-		-	-	-	-	-	-	-	-	-	-
Aradu.A10	87776126		-	-	-	-	-	-	-	-	-	-	-	-	-	-	-	-	-	-	-	-	-		-	-	-	-	-	-	-	-	-	-
Aradu.A10	88475620		-	-	-	-	-	-	-	-	-	-	-	-	-	-	-	-	-	-	-	-	-		-	-	-	-	-	-	-	-	-	-
Aradu.A10	89326285		-	-	-	-	-	-	-	-	-	-	-	-	-	-	-	-	-	-	-	-	-		-	-	-	-	-	-	-	-	-	-
Aradu.A10	90440162		-	-	-	-	-	-	-	-	-	-	-	-	-	-	-	-	-	-	-	-	-		-	-	-	-	-	-	-	-	-	-
Aradu.A10	92558727		-	-	-	-	-	-	-	-	-	-	-	-	-	-	-	-	-	-	-	-	-		-	-	-	-	-	-	-	-	-	-
Aradu.A10	95157723		-	-	-	-	-	-	-	-	-	-	-	-	-	-	-	-	-	-	-	-	-		-	-	-	-	-	-	-	-	-	-
Aradu.A10	95250338		Sten1	Sten1	Sten1	Sten1	Sten1	Sten1	Sten1	-	-	Sten1	Sten1	Sten1	Sten1	Sten1	Sten1	Sten1	Sten1	Sten1	-	Sten1	Sten1		Sten1	-	-	-	Sten1	Sten1	Sten1	Sten1	-	-
Aradu.A10	97813091		-	-	-	-	-	-	-	-	-	-	-	-	-	-	-	-	-	-	-	-	-		-	-	-	-	-	-	-	-	-	-
Aradu.A10	97976609		-	-	-	-	-	-	-	-	-	-	-	-	-	-	-	-	-	-	-	-	-		-	-	-	-	-	-	-	-	-	-
Aradu.A10	98891152		-	-	-	-	-	-	-	-	Sten1	-	-	-	-	-	-	-	-	-	-	-	-		-	-	-	-	-	-	-	-	-	-
Aradu.A10	99172713		-	-	-	-	-	-	-	-	-	-	-	-	-	-	-	-	-	-	-	-	-		-	-	-	-	-	-	-	-	-	-
Aradu.A10	100698734		-	-	-	-	-	-	-	-	-	-	-	-	-	-	-	-	-	-	-	-	-		-	-	-	-	-	-	-	-	-	-
Aradu.A10	101233597		-	-	-	-	-	-	-	-	-	-	-	-	-	-	-	-	-	-	-	-	-		-	-	-	-	-	-	-	-	-	-
Aradu.A10	102629772		-	-	-	-	-	-	-	-	-	-	-	-	-	-	-	-	-	-	-	-	-		-	-	-	-	-	-	-	-	-	-
Aradu.A10	104138451		-	-	-	-	-	-	-	-	-	-	-	-	-	-	-	-	-	-	-	-	-		-	-	-	-	-	-	-	-	-	-
Aradu.A10	104321878		-	-	-	-	-	-	-	-	-	-	-	-	-	-	-	-	-	-	-	-	-		-	-	-	-	-	-	-	-	-	-
Aradu.A10	104350153		-	-	-	-	-	-	-	-	-	-	-	-	-	-	-	-	-	-	-	-	-		-	-	-	-	-	-	-	-	-	-
Aradu.A10	104660224		-	-	-	-	-	-	-	-	-	-	-	-	-	-	-	-	-	-	-	-	-		-	-	-	-	-	-	-	-	-	-
Aradu.A10	104674897		-	-	-	-	-	-	-	-	Sten1	-	-	-	-	-	-	-	-	-	-	-	-		-	-	-	-	-	-	-	-	-	-
Aradu.A10	105330517		-	-	-	-	-	-	-	-	-	-	-	-	-	-	-	-	-	-	-	-	-		-	-	-	-	-	-	-	-	-	-
Aradu.A10	105330547		-	-	-	-	-	-	-	-	-	-	-	-	-	-	-	-	-	-	-	-	-		-	-	-	-	-	-	-	-	-	-
Aradu.A10	105362018		-	-	-	-	-	-	-	-	-	-	-	-	-	-	-	-	-	-	-	-	-		-	-	-	-	-	-	-	-	-	-
Aradu.A10	105771895		-	-	-	-	-	-	-	-	-	-	-	-	-	-	-	-	-	-	-	-	-		-	-	-	-	-	-	-	-	-	-
Aradu.A10	106521723		-	-	-	-	-	-	-	-	-	-	-	-	-	-	-	-	-	-	-	-	-		-	-	-	-	-	-	-	-	-	-
Aradu.A10	107338680		-	-	-	-	-	-	-	-	-	-	-	-	-	-	-	-	-	-	-	-	-		-	-	-	-	-	-	-	-	-	-
Aradu.A10	107485112		-	-	-	-	-	-	-	-	-	-	-	-	-	-	-	-	-	-	-	-	-		-	-	-	-	-	-	-	-	-	-
Aradu.A10	107674813		-	-	-	-	-	-	-	-	-	-	-	-	-	-	-	-	-	-	-	-	-		-	-	-	-	-	-	-	-	-	-
Aradu.A10	107885754		-	-	-	-	-	-	-	-	-	-	-	-	-	-	-	-	-	-	-	-	-		-	-	-	-	-	-	-	-	-	-
Aradu.A10	108153415		-	-	-	-	-	-	-	-	-	-	-	-	-	-	-	-	-	-	-	-	-		-	-	-	-	-	-	-	-	-	-
Aradu.A10	108838533		-	-	-	-	-	-	-	-	-	-	-	-	-	-	-	-	-	-	-	-	-		-	-	-	-	-	-	-	-	-	-
#REF!	#REF!		Mag2	Mag2	Mag2	Mag2	Mag2	Mag2	Mag2	Mag2	Mag1	Mag2	Mag2	Mag2	Mag2	Mag2	Mag2	Mag2	Mag2	Mag1	Mag2	Mag2	Mag2		Mag1	Mag1	Mag1	Mag1	Mag1	Mag1	-	Mag2	Mag1	Mag2
Araip.B01	525042		Mag2	Mag2	Mag2	Mag2	Mag2	Mag2	Mag2	Mag2	Mag1	Mag2	Mag2	Mag2	Mag2	Mag2	Mag2	Mag2	Mag2	Mag1	Mag2	Mag2	Mag2		Mag1	Mag1	Mag1	Mag1	Mag1	Mag1	-	Mag2	Mag1	Mag2
Araip.B01	769119		Mag2	Mag2	Mag2	Mag2	Mag2	Mag2	Mag2	Mag2	Mag1	Mag2	Mag2	Mag2	Mag2	Mag2	Mag2	Mag2	Mag2	Mag1	Mag2	Mag2	Mag2		Mag1	Mag1	Mag1	Mag1	Mag1	Mag1	-	Mag2	Mag1	Mag2
Araip.B01	896297		Mag2	Mag2	Mag2	Mag2	Mag2	Mag2	Mag2	Mag2	Mag1	Mag2	Mag2	Mag2	Mag2	Mag2	Mag2	Mag2	Mag2	Mag1	Mag2	Mag2	Mag2		Mag1	Mag1	Mag1	Mag1	Mag1	Mag1	-	Mag2	Mag1	Mag2
Araip.B01	1128855		Mag2	Mag2	Mag2	Mag2	Mag2	Mag2	Mag2	Mag2	Mag1	Mag2	Mag2	Mag2	Mag2	Mag2	Mag2	Mag2	Mag2	Mag1	Mag2	Mag2	Mag2		Mag1	Mag1	Mag1	Mag1	Mag1	Mag1	-	Mag2	Mag1	Mag2
Araip.B01	1220452		Mag2	Mag2	Mag2	Mag2	Mag2	Mag2	Mag2	Mag2	Mag1	Mag2	Mag2	Mag2	Mag2	Mag2	Mag2	Mag2	Mag2	Mag1	Mag2	Mag2	Mag2		Mag1	Mag1	Mag1	Mag1	Mag1	Mag1	-	Mag2	Mag1	Mag2
Araip.B01	1431059		Mag1	Mag1	Mag1	Mag1	Mag1	Mag1	Mag1	Mag1	-	Mag1	Mag1	Mag1	Mag1	Mag1	Mag1	Mag1	Mag1	Mag1	Mag1	Mag1	Mag1		-	-	-	-	-	-	-	Mag1	-	Mag1
Araip.B01	1453243		Mag2	Mag2	Mag2	Mag2	Mag2	Mag2	Mag2	Mag2	Mag1	Mag2	Mag2	Mag2	Mag2	Mag2	Mag2	Mag2	Mag2	Mag1	Mag2	Mag2	Mag2		Mag1	Mag1	Mag1	Mag1	Mag1	Mag1	-	Mag2	Mag1	Mag2
Araip.B01	2102983		Mag2	Mag2	Mag2	Mag2	Mag2	Mag2	Mag2	Mag2	Mag1	Mag2	Mag2	Mag2	Mag2	Mag2	Mag2	Mag2	Mag2	Mag1	Mag2	Mag2	Mag2		Mag2	Mag1	Mag1	Mag1	Mag1	Mag1	-	Mag2	Mag1	Mag2
Araip.B01	3439024		-	-	-	-	-	-	-	-	-	-	-	-	-	-	-	-	-	-	-	-	-		-	-	-	-	-	-	-	-	-	-
Araip.B01	3624699		-	-	-	-	-	-	-	-	-	-	-	-	-	-	-	-	-	-	-	-	-		-	-	-	-	-	-	-	-	-	-
Araip.B01	3963695		-	-	-	-	-	-	-	-	-	-	-	-	-	-	-	-	-	-	-	-	-		-	-	-	-	-	-	-	-	-	-
Araip.B01	3991793		-	-	-	-	-	-	-	-	-	-	-	-	-	-	-	-	-	-	-	-	-		-	-	-	-	-	-	-	-	-	-
Araip.B01	5672434		-	-	-	-	-	-	-	-	-	-	-	-	-	-	-	-	-	-	-	-	-		-	-	-	-	-	-	-	-	-	-
Araip.B01	6337719		-	-	-	-	-	-	-	-	-	-	-	-	-	-	-	-	-	-	-	-	-		-	-	-	-	-	-	-	-	-	-
Araip.B01	7216931		-	-	-	-	-	-	-	-	-	-	-	-	-	-	-	-	-	-	-	-	-		-	-	-	-	-	-	-	-	-	-
Araip.B01	7369157		-	-	-	-	-	-	-	-	-	-	-	-	-	-	-	-	-	-	-	-	-		-	-	-	-	-	-	-	-	-	-
Araip.B01	9391666		-	-	-	-	-	-	-	-	-	-	-	-	-	-	-	-	-	-	-	-	-		-	-	-	-	-	-	-	-	-	-
Araip.B01	13030024		-	-	-	-	-	-	-	-	-	-	-	-	-	-	-	-	-	-	-	-	-		-	-	-	-	-	-	-	-	-	-
Araip.B01	13582092		-	-	-	-	-	-	-	-	-	-	-	-	-	-	-	-	-	-	-	-	-		-	-	-	-	-	-	-	-	-	-
Araip.B01	17264472		-	-	-	-	-	-	-	-	-	-	-	-	-	-	-	-	-	-	-	-	-		-	-	-	-	-	-	-	-	-	-
Araip.B01	18257524		-	-	-	-	-	-	-	-	-	-	-	-	-	-	-	-	-	-	-	-	-		-	-	-	-	-	-	-	-	-	-
Araip.B01	22199621		-	-	-	-	-	-	-	-	-	-	-	-	-	-	-	-	-	-	-	-	-		-	-	-	-	-	-	-	-	-	-
Araip.B01	24245922		-	-	-	-	-	-	-	-	-	-	-	-	-	-	-	-	-	-	-	-	-		-	-	-	-	-	-	-	-	-	-
Araip.B01	27441886		Mag1	Mag1	Mag2	Mag1	Mag1	Mag1	Mag1	Mag1	-	Mag1	Mag1	Mag1	Mag1	Mag1	Mag1	Mag2	Mag1	-	Mag2	Mag1	Mag1		-	Mag1	-	Mag1	Mag1	Mag1	Mag2	Mag1	Mag2	Mag1
Araip.B01	28280638		-	-	-	-	-	-	-	-	-	-	-	-	-	-	-	-	-	-	-	-	-		-	-	-	-	-	-	-	-	-	-
Araip.B01	32580976		-	-	-	-	-	-	-	-	-	-	-	-	-	-	-	-	-	-	-	-	-		-	-	-	-	-	-	-	-	-	-
Araip.B01	33166457		-	-	-	-	-	-	-	-	-	-	-	-	-	-	-	-	-	-	-	-	-		-	-	-	-	-	-	-	-	-	-
Araip.B01	33888690		-	-	-	-	-	-	-	-	-	-	-	-	-	-	-	-	-	-	-	-	-		-	-	-	-	-	-	-	-	-	-
Araip.B01	36538462		-	-	-	-	-	-	-	-	-	-	-	-	-	-	-	-	-	-	-	-	-		-	-	-	-	-	-	-	-	-	-
Araip.B01	41386088		-	-	-	-	-	-	-	-	-	-	-	-	-	-	-	-	-	-	-	-	-		-	-	-	-	-	-	-	-	-	-
Araip.B01	47005832		-	-	-	-	-	-	-	-	-	-	-	-	-	-	-	-	-	-	-	-	-		-	-	-	-	-	-	-	-	-	-
Araip.B01	52956625		-	-	-	-	-	-	-	-	-	-	-	-	-	-	-	-	-	-	-	-	-		-	-	-	-	-	-	-	-	-	-
Araip.B01	65696288		-	-	-	-	-	-	-	-	-	-	-	-	-	-	-	-	-	Mag1	-	-	-		-	-	-	-	-	-	-	-	-	-
Araip.B01	69167034		-	-	-	-	-	-	-	-	-	-	-	-	-	-	-	-	-	Mag1	-	-	-		-	-	-	-	-	-	-	-	-	-
Araip.B01	113755738		-	-	-	-	-	-	-	-	-	-	-	-	-	-	-	-	-	Mag1	-	-	-		-	-	-	-	-	-	-	-	-	-
Araip.B01	114749669		-	-	-	-	-	-	-	-	-	-	-	-	-	-	-	-	-	-	-	-	-		-	-	-	-	-	-	-	-	-	-
Araip.B01	116043545		Mag2	Mag2	Mag2	Mag2	Mag2	Mag2	Mag2	Mag2	Mag1	Mag2	Mag2	Mag2	Mag2	Mag2	Mag2	Mag2	Mag2	Mag1	Mag2	Mag2	Mag2		Mag2	Mag1	Mag2	Mag1	Mag2	-	Mag2	Mag1	Mag2	Mag1
Araip.B01	116719216		Mag2	Mag2	Mag2	Mag2	Mag2	Mag2	Mag2	Mag2	Mag1	Mag2	Mag2	Mag2	Mag2	Mag2	Mag2	Mag2	Mag2	Mag1	Mag2	Mag2	Mag2		Mag2	Mag1	Mag2	Mag1	Mag2	-	Mag2	Mag1	Mag2	Mag1
Araip.B01	117112930		Mag1	Mag1	Mag1	Mag1	Mag1	Mag1	Mag1	Mag1	-	Mag1	Mag1	Mag1	Mag1	Mag1	Mag1	Mag1	Mag1	-	Mag1	Mag1	Mag1		Mag2	Mag1	Mag2	Mag1	Mag2	-	Mag2	Mag1	Mag2	Mag1
Araip.B01	121368506		-	-	-	-	-	-	-	-	-	-	-	-	-	-	-	-	-	-	Mag1	-	-		-	-	-	-	-	-	-	-	-	-
Araip.B01	121642962		Mag2	Mag2	Mag2	Mag2	Mag2	Mag2	Mag2	Mag2	Mag1	Mag2	Mag2	Mag2	Mag2	Mag2	Mag2	Mag2	Mag2	Mag1	Mag2	Mag2	Mag2		Mag2	Mag1	Mag2	Mag1	Mag2	-	Mag2	Mag1	Mag2	Mag1
Araip.B01	122737994		-	-	-	-	-	-	-	-	-	-	-	-	-	-	-	-	-	-	-	-	-		-	-	-	-	-	-	-	-	-	-
Araip.B01	124135621		-	-	-	-	-	-	-	-	-	-	-	-	-	-	-	-	-	-	-	-	-		-	-	-	-	-	-	-	-	-	-
Araip.B01	125661644		-	-	-	-	-	-	-	-	-	-	-	-	-	-	-	-	-	-	-	-	-		-	-	-	-	-	-	-	-	-	-
Araip.B01	126121763		-	-	-	-	-	-	-	-	-	-	-	-	-	-	-	-	-	-	-	-	-		-	-	-	-	-	-	-	-	-	-
Araip.B01	126275267		-	-	-	-	-	-	-	-	-	-	-	-	-	-	-	-	-	-	-	-	-		-	-	-	-	-	-	-	-	-	-
Araip.B01	127008022		-	-	-	-	-	-	-	-	-	-	-	-	-	-	-	-	-	-	-	-	-		-	-	-	-	-	-	-	-	-	-
Araip.B01	127063836		-	-	-	-	-	-	-	-	-	-	-	-	-	-	-	-	-	-	-	-	-		-	-	-	-	-	-	-	-	-	-
Araip.B01	129329429		-	-	-	-	-	-	-	-	-	-	-	-	-	-	-	-	-	-	-	-	-		-	-	-	-	-	-	-	-	-	-
Araip.B01	129357167		-	-	-	-	-	-	-	-	-	-	-	-	-	-	-	-	-	-	-	-	-		-	-	-	-	-	-	-	-	-	-
Araip.B01	129513514		-	-	-	-	-	-	-	-	-	-	-	-	-	-	-	-	-	-	-	-	-		-	-	-	-	-	-	-	-	-	-
Araip.B01	129771687		-	-	-	-	-	-	-	-	-	-	-	-	-	-	-	-	-	-	-	-	-		-	-	-	-	-	-	-	-	-	-
Araip.B01	129882691		-	-	-	-	-	-	-	-	-	-	-	-	-	-	-	-	-	-	-	-	-		-	-	-	-	-	-	-	-	-	-
Araip.B01	131386591		-	-	-	-	-	-	-	-	-	-	-	-	-	-	-	-	-	-	-	-	-		-	-	-	-	-	-	-	-	-	-
Araip.B01	132569217		-	-	-	-	-	-	-	-	-	-	-	-	-	-	-	-	-	-	-	-	-		-	-	-	-	-	-	-	-	-	-
Araip.B01	133926550		-	-	-	-	-	-	-	-	-	-	-	-	-	-	-	-	-	-	-	-	-		-	-	-	-	-	-	-	-	-	-
Araip.B01	135112455		-	-	-	-	-	-	-	-	-	-	-	-	-	-	-	-	-	-	-	-	-		-	-	-	-	-	-	-	-	-	-
Araip.B01	135222846		-	-	-	-	-	-	-	-	-	-	-	-	-	-	-	-	-	-	-	-	-		-	-	-	-	-	-	-	-	-	-
Araip.B01	136439457		-	-	-	-	-	-	-	-	-	-	-	-	-	-	-	-	-	-	-	-	-		-	-	-	-	-	-	-	-	-	-
Araip.B01	136506177		-	-	-	-	-	-	-	-	-	-	-	-	-	-	-	-	-	-	-	-	-		-	-	-	-	-	-	-	-	-	-
Araip.B01	137130556		-	-	-	-	-	-	-	-	-	-	-	-	-	-	-	-	-	-	-	-	-		-	-	-	-	-	-	-	-	-	-
Araip.B02	262035		-	-	-	-	-	-	-	-	-	-	-	-	-	-	-	-	-	-	-	-	-		-	-	-	-	-	-	-	-	-	-
Araip.B02	378957		-	-	-	-	-	-	-	-	Mag1	-	-	-	-	-	-	-	-	-	-	-	-		-	-	-	-	-	-	-	-	-	-
Araip.B02	402830		-	-	-	-	-	-	-	-	-	-	-	-	-	-	-	-	-	-	-	-	-		-	-	-	-	-	-	-	-	-	-
Araip.B02	463495		-	-	-	-	-	-	-	-	Mag1	-	-	-	-	-	-	-	-	-	-	-	-		-	-	-	-	-	-	-	-	-	-
Araip.B02	492391		-	-	-	-	-	-	-	-	Mag1	-	-	-	-	-	-	-	-	-	-	-	-		-	-	-	-	-	-	-	-	-	-
Araip.B02	778642		-	-	-	-	-	-	-	-	Mag1	-	-	-	-	-	-	-	-	-	-	-	-		-	-	-	-	-	-	-	-	-	-
Araip.B02	1296859		-	-	-	-	-	-	-	-	Mag1	-	-	-	-	-	-	-	-	-	-	-	-		-	-	-	-	-	-	-	-	-	-
Araip.B02	1316076		-	-	-	-	-	-	-	-	Mag1	-	-	-	-	-	-	-	-	-	-	-	-		-	-	-	-	-	-	-	-	-	-
Araip.B02	1620220		-	-	-	-	-	-	-	-	Mag1	-	-	-	-	-	-	-	-	-	-	-	-		-	-	-	-	-	-	-	-	-	-
Araip.B02	1783128		-	-	-	-	-	-	-	-	-	-	-	-	-	-	-	-	-	-	-	-	-		-	-	-	-	-	-	-	-	-	-
Araip.B02	1979905		-	-	-	-	-	-	-	-	Mag1	-	-	-	-	-	-	-	-	-	-	-	-		-	-	-	-	-	-	-	-	-	-
Araip.B02	2197152		-	-	-	-	-	-	-	-	Mag1	-	-	-	-	-	-	-	-	-	-	-	-		-	-	-	-	-	-	-	-	-	-
Araip.B02	2291623		-	-	-	-	-	-	-	-	-	-	-	-	-	-	-	-	-	-	-	-	-		-	-	-	-	-	-	-	-	-	-
Araip.B02	2365066		-	-	-	-	-	-	-	-	Mag1	-	-	-	-	-	-	-	-	-	-	-	-		-	-	-	-	-	-	-	-	-	-
Araip.B02	2423971		-	-	-	-	-	-	-	-	-	-	-	-	-	-	-	-	-	-	-	-	-		-	-	-	-	-	-	-	-	-	-
Araip.B02	2467872		-	-	-	-	-	-	-	-	-	-	-	-	-	-	-	-	-	-	-	-	-		-	-	-	-	-	-	-	-	-	-
Araip.B02	2510172		-	-	-	-	-	-	-	-	Mag1	-	-	-	-	-	-	-	-	-	-	-	-		-	-	-	-	-	-	-	-	-	-
Araip.B02	4591623		-	-	-	-	-	-	-	-	-	-	-	-	-	-	-	-	-	-	-	-	-		-	-	-	-	-	-	-	-	-	-
Araip.B02	4649921		-	-	-	-	-	-	-	-	-	-	-	-	-	-	-	-	-	-	-	-	-		-	-	-	-	-	-	-	-	-	-
Araip.B02	7756210		-	-	-	-	-	-	-	-	-	-	-	-	-	-	-	-	-	-	-	-	-		-	-	-	-	-	-	-	-	-	-
Araip.B02	7863983		-	-	-	-	-	-	-	-	-	-	-	-	-	-	-	-	-	-	-	-	-		-	-	-	-	-	-	-	-	-	-
Araip.B02	9327175		-	-	-	-	-	-	-	-	-	-	-	-	-	-	-	-	-	-	-	-	-		-	-	-	-	-	-	-	-	-	-
Araip.B02	10083831		-	-	-	-	-	-	-	-	-	-	-	-	-	-	-	-	-	-	-	-	-		-	-	-	-	-	-	-	-	-	-
Araip.B02	12432351		-	-	-	-	-	-	-	-	-	-	-	-	-	-	-	-	-	-	-	-	-		-	-	-	-	-	-	-	-	-	-
Araip.B02	13566985		-	-	-	-	-	-	-	-	-	-	-	-	-	-	-	-	-	-	-	-	-		-	-	-	-	-	-	-	-	-	-
Araip.B02	16302789		-	-	-	-	-	-	-	-	-	-	-	-	-	-	-	-	-	-	-	-	-		-	-	-	-	-	-	-	-	-	-
Araip.B02	16781198		-	-	-	-	-	-	-	-	-	-	-	-	-	-	-	-	-	-	-	-	-		-	-	-	-	-	-	-	-	-	-
Araip.B02	25034123		-	-	-	-	-	-	-	-	Mag1	-	-	-	-	-	-	-	-	Mag1	-	-	-		-	-	-	-	-	-	-	-	-	-
Araip.B02	26040338		-	-	-	-	-	-	-	-	-	-	-	-	-	-	-	-	-	-	-	-	-		-	-	-	-	-	-	-	-	-	-
Araip.B02	26874221		-	-	-	-	-	-	-	-	-	-	-	-	-	-	-	-	-	Mag1	-	-	-		-	-	-	-	-	-	-	-	-	-
Araip.B02	28746336		-	-	-	-	-	-	-	-	-	-	-	-	-	-	-	-	-	-	-	-	-		-	-	-	-	-	-	-	-	-	-
[truncated: 659 more rows]
