# Supplementary material for: Marker-assisted introgression of wild chromosome segments conferring resistance to fungal foliar diseases into peanut (Arachis hypogaea L.)
Source: Front Plant Sci. 2023 Mar 17;14:1139361. doi: 10.3389/fpls.2023.1139361 (PMC10088909; doi:10.3389/fpls.2023.1139361)
Supplement: Supplementary file 2 [file Table_2.xlsx]

## Sheet: LLS
BC3F2				****1%	***5%			BC3F4				****1%	***5%			BC3F5				****1%	***5%			BC4F2				****1%	***5%
SNP Affy	Chrom.	Position (bp)	LOD	Sign.				SNP Affy	Chrom.	Position (bp)	LOD	Sign.				SNP Affy	Chrom.	Position (bp)	LOD	Sign.				SNP Affy	Chrom.	Position (bp)	LOD	Sign.
AX-147207636	A01	230496	4.90411	****				AX-147207653	A01	328589	1.18359					AX-147211929	A01	100451974	0.489772					AX-176823530	A02	107155	1.28754
AX-147207653	A01	328589	6.99619	****	Thresholds:			AX-176791317	A01	510521	1.90428		Thresholds:			AX-176821405	A01	100594409	0.512219		Thresholds:			AX-147212141	A02	174898	1.28754		Thresholds:
AX-176791317	A01	510521	7.17835	****	1% > 4.33			AX-147265635	A01	595640	1.94131		1% > 4.63			AX-147211986	A01	102053529	0.897516		1% > 4.17			AX-176792377	A02	177786	1.28754		1% > 3.97
AX-147265635	A01	595640	7.24263	****	5% > 3.71			AX-147207739	A01	738171	1.90136		5% > 3.84			AX-147211994	A01	102165459	0.563539		5% > 3.34			AX-147212174	A02	314196	1.28754		5% > 3.2
AX-147207739	A01	738171	7.15214	****				AX-147207744	A01	773107	1.90135					AX-147212014	A01	102837904	0.42465					AX-147212176	A02	327195	1.28754
AX-147207741	A01	748457	7.15144	****				AX-147207750	A01	785346	1.90135					AX-176815645	A01	103615126	9.11402	****				AX-147212177	A02	328324	1.28754
AX-147207744	A01	773107	7.15168	****				AX-147207751	A01	795710	1.90136					AX-147212041	A01	104077042	1.0184					AX-147212216	A02	524914	1.28754
AX-147207750	A01	785346	7.15231	****				AX-147207766	A01	907490	1.84754					AX-176803609	A01	104121701	0.988559					AX-177638711	A02	524938	1.28754
AX-147207751	A01	795710	7.15144	****				AX-147207768	A01	922352	1.84847					AX-176792555	A01	104855229	1.00612					AX-147212220	A02	529301	1.28754
AX-147207766	A01	907490	7.13605	****				AX-147207782	A01	1006721	1.70048					AX-147212065	A01	105355893	1.3851					AX-147260412	A02	549740	1.28754
AX-147207768	A01	922352	7.1376	****				AX-147207792	A01	1040768	1.61434					AX-147212094	A01	106856793	1.37598					AX-176823854	A02	610745	1.28754
AX-147207782	A01	1006721	7.15144	****				AX-147207811	A01	1117549	1.61434													AX-147212305	A02	770726	1.28754
AX-147207792	A01	1040768	7.15144	****				AX-147207865	A01	1399658	1.90137					AX-176823530	A02	107155	0.233937					AX-177637178	A02	771251	1.28754
AX-147207796	A01	1043415	7.15144	****				AX-147207867	A01	1427181	1.90137					AX-147212141	A02	174898	0.23321					AX-147212320	A02	805196	1.28754
AX-147207810	A01	1117391	7.15144	****				AX-147207874	A01	1450824	2.07436					AX-147212216	A02	524914	0.113897					AX-177639193	A02	857614	1.28754
AX-147207811	A01	1117549	7.15144	****				AX-147207931	A01	1651483	3.22927					AX-177639193	A02	857614	0.118058					AX-177638310	A02	902287	1.28754
AX-147265656	A01	1185064	7.05662	****				AX-147207942	A01	1705064	2.07295					AX-177638310	A02	902287	0.10618					AX-177642823	A02	902714	1.28754
AX-147207859	A01	1397197	7.15638	****				AX-147207949	A01	1724608	2.83822					AX-177642823	A02	902714	0.106181					AX-177644248	A02	950880	1.28754
AX-176791373	A01	1399041	7.15637	****				AX-147207960	A01	1777026	3.22644					AX-177637363	A02	1078390	0.233178					AX-177637363	A02	1078390	1.28759
AX-147207865	A01	1399658	7.15637	****				AX-147207971	A01	1788137	3.22627					AX-176821132	A02	1173968	0.233182					AX-176821132	A02	1173968	1.28754
AX-147207867	A01	1427181	7.35219	****				AX-147207989	A01	1845128	1.91353					AX-176819339	A02	1200821	0.233183					AX-147212409	A02	1180998	1.28754
AX-147207874	A01	1450824	7.35105	****				AX-176791319	A01	1873370	1.90136					AX-176823317	A02	1444372	0.239901					AX-176819339	A02	1200821	1.28754
AX-147207931	A01	1651483	7.85004	****				AX-147208012	A01	1916852	1.61424					AX-177637135	A02	1756905	0.700056					AX-147212428	A02	1225369	1.28754
AX-147207942	A01	1705064	7.8394	****				AX-147208016	A01	1950993	1.61421					AX-176821270	A02	1795704	0.252918					AX-147212463	A02	1333411	1.28771
AX-147207949	A01	1724608	7.8387	****				AX-147208027	A01	1979329	1.61421					AX-176820678	A02	2413776	0.118162					AX-176823317	A02	1444372	1.28754
AX-147207952	A01	1734212	7.8389	****				AX-147208055	A01	2010809	1.61422					AX-147240119	A02	2483357	0.107033					AX-147212511	A02	1556477	1.28754
AX-147207960	A01	1777026	7.97562	****				AX-147208069	A01	2110707	1.81443					AX-176822484	A02	2495254	0.107053					AX-177637135	A02	1756905	1.28754
AX-147207965	A01	1783428	7.9789	****				AX-147208101	A01	2278223	1.79985					AX-176819115	A02	2495363	0.110904					AX-176821270	A02	1795704	1.28754
AX-147207971	A01	1788137	7.9765	****				AX-147208106	A01	2304266	1.83502					AX-147240131	A02	2497226	0.232786					AX-176820678	A02	2413776	1.28754
AX-147207989	A01	1845128	7.97726	****				AX-147208131	A01	2439513	1.90137					AX-147212659	A02	2557316	0.233019					AX-147240119	A02	2483357	1.28754
AX-176791319	A01	1873370	7.97618	****				AX-147208153	A01	2784796	1.90139					AX-147212669	A02	2594478	0.233164					AX-176822484	A02	2495254	1.28754
AX-147208012	A01	1916852	7.43908	****				AX-147208184	A01	2897855	2.11555					AX-147212672	A02	2595255	0.233161					AX-176819115	A02	2495363	1.28754
AX-147208016	A01	1950993	7.43909	****				AX-147208217	A01	3034640	2.88936					AX-176821041	A02	2599915	0.233182					AX-147240131	A02	2497226	1.28754
AX-147208027	A01	1979329	7.97669	****				AX-147208225	A01	3071017	1.90148					AX-147212687	A02	2640814	0.233179					AX-176823935	A02	2530491	1.28754
AX-147208038	A01	1984099	7.97669	****				AX-147208252	A01	3128533	2.87564					AX-176819218	A02	2782248	0.106011					AX-147212659	A02	2557316	1.28754
AX-147208052	A01	2010272	7.9165	****				AX-147208277	A01	3171803	1.90211					AX-176821862	A02	2827935	0.106221					AX-147212669	A02	2594478	1.28755
AX-147208055	A01	2010809	7.9165	****				AX-147208313	A01	3335170	1.90189					AX-147212764	A02	2931093	0.233183					AX-147212672	A02	2595255	1.28754
AX-147208069	A01	2110707	7.91447	****				AX-147208320	A01	3362317	1.90137					AX-147240252	A02	2931111	0.233182					AX-176821041	A02	2599915	1.28754
AX-147208100	A01	2272833	7.56981	****				AX-147208345	A01	3438883	2.76876					AX-147212765	A02	2932724	0.233182					AX-147212687	A02	2640814	1.28754
AX-147208101	A01	2278223	7.57227	****				AX-147208349	A01	3441950	2.25917					AX-176821123	A02	3001008	0.233182					AX-176819218	A02	2782248	1.28754
AX-147208105	A01	2303999	7.57718	****				AX-147208356	A01	3454654	1.90136					AX-176822843	A02	3036319	0.233182					AX-176821862	A02	2827935	1.28754
AX-147208106	A01	2304266	7.57718	****				AX-147208366	A01	3462248	1.90144					AX-176823331	A02	3040802	0.233153					AX-147212764	A02	2931093	1.28754
AX-147208130	A01	2434150	7.57522	****				AX-147208411	A01	3611395	1.90245					AX-176820632	A02	3049512	0.233178					AX-147240252	A02	2931111	1.28754
AX-147208131	A01	2439513	7.57836	****				AX-147208422	A01	3665567	1.90256					AX-147212820	A02	3375612	0.23287					AX-147212765	A02	2932724	1.28754
AX-147208153	A01	2784796	7.59751	****				AX-176819154	A01	3750316	1.90141					AX-147240352	A02	3377119	0.233181					AX-176821123	A02	3001008	1.28754
AX-147208184	A01	2897855	7.59062	****				AX-147208456	A01	3845309	2.4928					AX-176820410	A02	3377383	0.233182					AX-176822843	A02	3036319	1.28754
AX-147208217	A01	3034640	7.56429	****				AX-147208459	A01	3857470	1.90148					AX-176820559	A02	3486571	4.37612	****				AX-176823331	A02	3040802	1.28754
AX-147208225	A01	3071017	7.57017	****				AX-147208462	A01	3864763	2.8668					AX-176823912	A02	3490189	4.21839	****				AX-176820632	A02	3049512	1.28754
AX-147265734	A01	3120188	7.5732	****				AX-147208477	A01	3947660	2.46369					AX-177639986	A02	3666632	3.38288	***				AX-147212820	A02	3375612	1.28754
AX-147208245	A01	3120434	7.5732	****				AX-147208481	A01	3986510	1.90154					AX-177638814	A02	3667446	3.37831	***				AX-147240352	A02	3377119	1.28754
AX-147208252	A01	3128533	7.5732	****				AX-147208523	A01	4143724	2.04201					AX-147212858	A02	3769110	4.01468	***				AX-176820410	A02	3377383	1.28752
AX-147208277	A01	3171803	7.57558	****				AX-147208570	A01	4472019	3.2418					AX-147240478	A02	3939035	4.06104	***				AX-176820559	A02	3486571	0.530817
AX-147208281	A01	3173724	7.57559	****				AX-147208592	A01	4568812	2.78194					AX-147240497	A02	4085059	4.52031	****				AX-176823912	A02	3490189	0.530704
AX-147265751	A01	3331989	7.57549	****				AX-147208614	A01	4678382	1.90148					AX-176819448	A02	4403696	4.13395	***				AX-177639986	A02	3666632	0.336993
AX-147208313	A01	3335170	7.5732	****				AX-147208650	A01	4901872	3.063					AX-147240530	A02	4723506	3.87308	***				AX-177638814	A02	3667446	0.336959
AX-147208320	A01	3362317	7.57321	****				AX-147208681	A01	4956444	1.90148					AX-147240532	A02	4724850	3.87308	***				AX-147212858	A02	3769110	0.51123
AX-147208345	A01	3438883	7.89408	****				AX-147208686	A01	4971720	2.30852					AX-147212940	A02	4851345	3.87308	***				AX-147240478	A02	3939035	0.511235
AX-147208349	A01	3441950	7.89408	****				AX-147208687	A01	4971756	2.73041					AX-147212952	A02	4883639	3.87308	***				AX-147240497	A02	4085059	0.405212
AX-147208356	A01	3454654	7.94459	****				AX-147208809	A01	5589971	1.90142					AX-147240559	A02	4888203	3.87308	***				AX-176819448	A02	4403696	0.616395
AX-147265768	A01	3460850	7.90959	****				AX-147208902	A01	6200658	1.90137					AX-176792125	A02	4899160	3.87308	***				AX-176794388	A02	4576169	0.649597
AX-147208366	A01	3462248	7.90958	****				AX-147208929	A01	6337729	1.90137					AX-147212981	A02	5238703	3.87308	***				AX-147240530	A02	4723506	0.622775
AX-147208411	A01	3611395	7.83475	****				AX-147208979	A01	6679029	1.70277					AX-147212990	A02	5270226	3.87307	***				AX-147240532	A02	4724850	0.622829
AX-147208422	A01	3665567	7.83456	****				AX-147208980	A01	6679084	1.70278					AX-147213014	A02	5535443	1.49877					AX-147212940	A02	4851345	0.622773
AX-147208436	A01	3749655	7.81941	****				AX-147208981	A01	6679326	1.90136					AX-147213017	A02	5537506	1.49877					AX-147212952	A02	4883639	0.622773
AX-176819154	A01	3750316	7.81941	****				AX-147208984	A01	6679617	1.90135					AX-147213029	A02	5597149	1.49877					AX-147240559	A02	4888203	0.622789
AX-147208456	A01	3845309	7.79196	****				AX-176816188	A01	8785306	7.25351	****				AX-177643693	A02	5796224	1.49877					AX-176792125	A02	4899160	0.622773
AX-147208459	A01	3857470	7.83464	****				AX-176794379	A01	9851850	2.95296					AX-177643707	A02	5816135	1.49877					AX-147212981	A02	5238703	0.622773
AX-147208462	A01	3864763	7.83464	****												AX-147213119	A02	6341150	1.49877					AX-147212990	A02	5270226	0.622773
AX-147208477	A01	3947660	7.82016	****				AX-176821862	A02	2827935	0.141958					AX-147213146	A02	6593512	1.49877					AX-147213014	A02	5535443	0.622774
AX-147208481	A01	3986510	7.83455	****				AX-147212764	A02	2931093	0.129859					AX-147213155	A02	6827826	1.50941					AX-147213017	A02	5537506	0.622774
AX-147208523	A01	4143724	7.83249	****				AX-147240252	A02	2931111	0.129859					AX-147213230	A02	8195496	1.37669					AX-147213029	A02	5597149	0.623983
AX-176791360	A01	4147264	7.89211	****				AX-147212765	A02	2932724	0.143965					AX-147213245	A02	8377985	1.50213					AX-177643693	A02	5796224	0.622773
AX-147208570	A01	4472019	7.83455	****				AX-176821123	A02	3001008	0.135544					AX-147213292	A02	8798082	1.50214					AX-177643707	A02	5816135	0.622773
AX-147208592	A01	4568812	7.83457	****				AX-176821465	A02	3034367	0.222559					AX-147213317	A02	9782639	1.50214					AX-147213119	A02	6341150	0.555878
AX-147208614	A01	4678382	7.78596	****				AX-176822843	A02	3036319	0.22543					AX-147213328	A02	10054069	1.50214					AX-147213146	A02	6593512	0.555871
AX-147237795	A01	4889328	7.71821	****				AX-176820632	A02	3049512	0.352463					AX-176823661	A02	14728483	2.19596					AX-147213155	A02	6827826	0.555871
AX-147208650	A01	4901872	7.69379	****				AX-147240352	A02	3377119	0.149552					AX-147213472	A02	14937685	1.50214					AX-147213230	A02	8195496	0.587866
AX-147208681	A01	4956444	7.90666	****				AX-176820410	A02	3377383	0.14957					AX-147213476	A02	14943833	1.50214					AX-147213245	A02	8377985	0.554913
AX-147208686	A01	4971720	7.90665	****				AX-176820559	A02	3486571	9.05897	****				AX-147213604	A02	25951674	1.50214					AX-147213292	A02	8798082	0.554906
AX-147208687	A01	4971756	7.90665	****				AX-176823912	A02	3490189	9.07067	****				AX-147213615	A02	28157230	1.50214					AX-147213317	A02	9782639	0.554906
AX-176815649	A01	5361582	8.57288	****				AX-177639986	A02	3666632	11.4039	****				AX-147213631	A02	28574740	1.50214					AX-147213328	A02	10054069	0.554905
AX-147208809	A01	5589971	8.49327	****				AX-177638814	A02	3667446	11.3724	****				AX-176799890	A02	30279507	1.61388					AX-176823661	A02	14728483	0.509115
AX-176822429	A01	6096023	8.42154	****				AX-147212858	A02	3769110	9.23512	****				AX-176807891	A02	32202107	0.823987					AX-147213472	A02	14937685	0.769559
AX-147208902	A01	6200658	8.40919	****				AX-147240478	A02	3939035	9.13523	****				AX-176806576	A02	33864947	0.932966					AX-147213476	A02	14943833	0.769559
AX-147208929	A01	6337729	8.51173	****				AX-147240497	A02	4085059	10.1651	****				AX-147213672	A02	36455473	1.50209					AX-147213604	A02	25951674	0.771052
AX-147208979	A01	6679029	8.37358	****				AX-176819448	A02	4403696	9.36712	****				AX-147213689	A02	39267704	1.50183					AX-147213615	A02	28157230	0.769559
AX-147208980	A01	6679084	8.37358	****				AX-147240530	A02	4723506	9.61088	****				AX-147213719	A02	42029329	1.50219					AX-147213631	A02	28574740	0.769559
AX-147208981	A01	6679326	8.37358	****				AX-147240532	A02	4724850	9.64245	****				AX-147213736	A02	43374948	1.50216					AX-176799890	A02	30279507	0.74689
AX-147208984	A01	6679617	8.37358	****				AX-147212940	A02	4851345	9.59839	****				AX-147213756	A02	47309222	1.50214					AX-176807891	A02	32202107	0.983219
AX-176820201	A01	29854378	1.77724					AX-147212952	A02	4883639	9.59854	****				AX-176810943	A02	50000826	1.50214					AX-176806576	A02	33864947	0.9327
AX-147211718	A01	92596134	0.160839					AX-147240559	A02	4888203	9.59939	****				AX-147213789	A02	52237448	1.50212					AX-147213672	A02	36455473	0.769569
AX-147211790	A01	94844203	0.0285939					AX-176792125	A02	4899160	9.6011	****				AX-176808317	A02	61811601	9.07616	****				AX-147213689	A02	39267704	0.792941
AX-147211796	A01	94937390	0.0249357					AX-147212981	A02	5238703	9.59835	****				AX-176823269	A02	62077250	9.0584	****				AX-147213719	A02	42029329	0.769678
AX-147211814	A01	95704657	0.016502					AX-147212990	A02	5270226	9.59834	****				AX-147213949	A02	64315367	1.51167					AX-147213736	A02	43374948	0.769559
AX-147211853	A01	96982501	0.0228683					AX-147213014	A02	5535443	7.62048	****				AX-147213981	A02	66368426	1.50214					AX-147213756	A02	47309222	0.769559
AX-147211860	A01	97205940	0.00501496					AX-147213017	A02	5537506	7.62059	****				AX-147213986	A02	67017415	1.50482					AX-176810943	A02	50000826	0.769559
AX-176801835	A01	97347534	0.00406173					AX-147213029	A02	5597149	7.62651	****				AX-176814130	A02	67418284	0.877075					AX-147213789	A02	52237448	0.769553
AX-176810594	A01	97504048	0.00384464					AX-177643693	A02	5796224	7.63012	****				AX-176799928	A02	67418357	0.832131					AX-176808317	A02	61811601	1.2878
AX-147211869	A01	97988649	0.00820022					AX-177643707	A02	5816135	7.63012	****				AX-147214000	A02	67418862	0.869077					AX-176823269	A02	62077250	0.858617
AX-176797791	A01	98044639	0.00600918					AX-147213119	A02	6341150	7.63012	****				AX-147214001	A02	67418874	1.00591					AX-176814119	A02	62739123	0.759477
AX-147211886	A01	98852433	0.0183784					AX-147213146	A02	6593512	7.63012	****				AX-147214003	A02	67420486	1.00662					AX-147213949	A02	64315367	0.539159
AX-147211900	A01	99546596	0.0183832					AX-147213155	A02	6827826	7.58966	****				AX-147214004	A02	67420580	1.0689					AX-177644064	A02	65804378	0.412915
AX-147211923	A01	100291833	0.0182716					AX-147213230	A02	8195496	7.43876	****				AX-176822439	A02	69099226	0.118755					AX-147213981	A02	66368426	0.691235
AX-147211929	A01	100451974	0.0227453					AX-147213245	A02	8377985	7.55252	****				AX-176806977	A02	73927285	1.2962					AX-147213986	A02	67017415	0.552021
AX-176821405	A01	100594409	0.0259818					AX-147213292	A02	8798082	7.46665	****				AX-147214185	A02	75731986	1.50212					AX-176814130	A02	67418284	0.383554
AX-147211986	A01	102053529	4.69642	****				AX-147213317	A02	9782639	7.45092	****				AX-147214234	A02	78187923	1.50213					AX-176799928	A02	67418357	0.383105
AX-147211994	A01	102165459	4.81944	****				AX-147213328	A02	10054069	7.63378	****				AX-147241878	A02	79414030	1.3733					AX-147214000	A02	67418862	0.0054572
AX-147212014	A01	102837904	5.24648	****				AX-176823661	A02	14728483	10.2583	****				AX-147241920	A02	80297365	1.52507					AX-147214001	A02	67418874	0.0433543
AX-147212041	A01	104077042	4.91496	****				AX-147213472	A02	14937685	7.45087	****				AX-176810329	A02	80730421	1.54831					AX-176793869	A02	67419937	0.0423166
AX-176803609	A01	104121701	4.9484	****				AX-147213476	A02	14943833	7.45086	****				AX-147214462	A02	81019015	1.46307					AX-147214003	A02	67420486	0.51356
AX-176792555	A01	104855229	4.8331	****				AX-147213604	A02	25951674	7.11627	****				AX-147214521	A02	81609784	1.50382					AX-147214004	A02	67420580	0.448573
AX-147212065	A01	105355893	4.92339	****				AX-147213615	A02	28157230	7.45086	****				AX-176803866	A02	82726495	1.50214					AX-176822439	A02	69099226	0.652303
AX-147212094	A01	106856793	5.09083	****				AX-147213631	A02	28574740	7.45086	****				AX-147242084	A02	82726525	1.50214					AX-176806977	A02	73927285	0.297115
								AX-176799890	A02	30279507	6.50019	****				AX-147214609	A02	82990736	1.50444					AX-176814164	A02	74475889	0.242035
AX-176820678	A02	2413776	1.17339					AX-176807891	A02	32202107	7.12277	****				AX-147214665	A02	83464195	1.63598					AX-147214185	A02	75731986	0.786149
AX-147240119	A02	2483357	1.17151					AX-176806576	A02	33864947	6.00218	****				AX-147242202	A02	84827010	1.73928					AX-147214234	A02	78187923	1.089
AX-176822484	A02	2495254	1.17186					AX-147213672	A02	36455473	7.45783	****				AX-147242208	A02	84880919	1.73928					AX-176817694	A02	79027979	0.627476
AX-176819115	A02	2495363	1.17185					AX-147213689	A02	39267704	7.42987	****				AX-177641619	A02	85209133	1.73928					AX-147241878	A02	79414030	0.768225
AX-147240131	A02	2497226	1.17109					AX-147213719	A02	42029329	6.98647	****				AX-147214809	A02	85315365	1.73928					AX-147241920	A02	80297365	0.462388
AX-176823935	A02	2530491	1.17068					AX-147213736	A02	43374948	7.45083	****				AX-147214811	A02	85316535	1.73928					AX-176810329	A02	80730421	0.461221
AX-147212659	A02	2557316	0.913864					AX-147213756	A02	47309222	7.43562	****				AX-176815768	A02	86069667	1.53928					AX-147214462	A02	81019015	0.426566
AX-147212669	A02	2594478	0.911501					AX-176810943	A02	50000826	7.47469	****				AX-176797275	A02	86659682	2.43248					AX-147214521	A02	81609784	0.639645
AX-147212672	A02	2595255	0.911152					AX-147213789	A02	52237448	7.45168	****				AX-147214925	A02	87417752	1.90236					AX-176803866	A02	82726495	0.642015
AX-176821041	A02	2599915	0.911152					AX-176808317	A02	61811601	0.967555					AX-176808199	A02	89078850	5.12578	****				AX-147242084	A02	82726525	0.642017
AX-147212687	A02	2640814	0.914282					AX-176823269	A02	62077250	0.940536					AX-147215014	A02	89159922	5.00403	****				AX-147214609	A02	82990736	0.721643
AX-176819218	A02	2782248	1.10026					AX-147213949	A02	64315367	8.00552	****				AX-176791419	A02	90812650	5.02662	****				AX-147214665	A02	83464195	0.696292
AX-176821862	A02	2827935	1.11505					AX-147213981	A02	66368426	7.4509	****				AX-147215181	A02	91638679	0.24367					AX-147242202	A02	84827010	0.534171
AX-147212764	A02	2931093	0.978465					AX-147213986	A02	67017415	7.27151	****				AX-147215210	A02	92077207	15.8232	****				AX-147242208	A02	84880919	0.534171
AX-147240252	A02	2931111	0.977351					AX-176799928	A02	67418357	7.9165	****				AX-147242820	A02	92612264	8.79928	****				AX-177641619	A02	85209133	0.526143
AX-147212765	A02	2932724	0.978695					AX-147214000	A02	67418862	7.80755	****				AX-147215231	A02	92958971	8.67883	****				AX-147214809	A02	85315365	0.575017
AX-176821123	A02	3001008	1.01199					AX-147214001	A02	67418874	7.80755	****				AX-147215261	A02	93790795	8.68062	****				AX-147214811	A02	85316535	0.57496
AX-176821465	A02	3034367	0.910829					AX-147214003	A02	67420486	6.68204	****												AX-176815768	A02	86069667	0.807653
AX-176822843	A02	3036319	0.93561					AX-147214004	A02	67420580	6.61263	****				AX-147215287	A03	263799	2.49345					AX-176797275	A02	86659682	0.212826
AX-176823331	A02	3040802	0.935618					AX-176822439	A02	69099226	5.01546	****				AX-147215321	A03	679404	4.45202	****				AX-147214925	A02	87417752	0.922686
AX-176820632	A02	3049512	0.916887					AX-176806977	A02	73927285	7.09169	****				AX-176808280	A03	1215455	8.99119	****				AX-176808199	A02	89078850	1.0887
AX-147212820	A02	3375612	0.945537					AX-147214185	A02	75731986	7.44182	****				AX-147215412	A03	1816539	9.12802	****				AX-147215014	A02	89159922	1.13101
AX-147240352	A02	3377119	0.947468					AX-147214234	A02	78187923	7.51094	****				AX-147215423	A03	1954749	17.4797	****				AX-176791419	A02	90812650	0.760145
AX-176820410	A02	3377383	0.947454					AX-147241878	A02	79414030	6.61431	****				AX-147215426	A03	1989523	17.4977	****				AX-147215181	A02	91638679	0.62956
AX-176820559	A02	3486571	10.4237	****				AX-147241920	A02	80297365	6.58418	****				AX-147215435	A03	2018420	17.9171	****				AX-147215183	A02	91655615	0.14961
AX-176823912	A02	3490189	10.4237	****				AX-176810329	A02	80730421	7.14615	****				AX-147215548	A03	3445290	18.1313	****				AX-147215210	A02	92077207	0.177171
AX-177639986	A02	3666632	10.5747	****				AX-147214462	A02	81019015	7.06436	****				AX-147215573	A03	3808006	16.2188	****				AX-147242811	A02	92317831	0.180251
AX-177638814	A02	3667446	10.5801	****				AX-147214521	A02	81609784	7.47626	****				AX-147215631	A03	4763112	17.8607	****				AX-147242820	A02	92612264	0.181958
AX-147212858	A02	3769110	10.7456	****				AX-176803866	A02	82726495	9.2591	****				AX-147243456	A03	5098297	14.2033	****				AX-147215231	A02	92958971	0.0929566
AX-147240478	A02	3939035	10.7327	****				AX-147242084	A02	82726525	9.2591	****				AX-147215688	A03	6058658	17.2994	****				AX-147215261	A02	93790795	0
AX-147240497	A02	4085059	15.4378	****				AX-147214609	A02	82990736	9.25918	****				AX-176795320	A03	6247470	8.78074	****
AX-176819448	A02	4403696	15.3539	****				AX-147214665	A02	83464195	9.62925	****				AX-147216005	A03	12100920	9.08827	****
AX-147240530	A02	4723506	10.4375	****				AX-147242202	A02	84827010	8.56227	****				AX-147216011	A03	12163967	14.0361	****				AX-147218747	A04	105953	2.4999
AX-147240532	A02	4724850	10.4375	****				AX-147242208	A02	84880919	8.64212	****				AX-147216035	A03	12860261	9.07889	****				AX-147218752	A04	162912	2.49926
AX-147212940	A02	4851345	10.5139	****				AX-177641619	A02	85209133	9.83104	****				AX-147216048	A03	13165005	9.07888	****				AX-147218758	A04	186370	2.49926
AX-147212952	A02	4883639	10.465	****				AX-147214809	A02	85315365	8.61055	****				AX-147244080	A03	19856824	9.25125	****				AX-147246426	A04	376077	2.34052
AX-147240559	A02	4888203	10.4651	****				AX-147214811	A02	85316535	8.61055	****				AX-176816839	A03	19857137	9.25125	****				AX-147218845	A04	814313	2.50967
AX-176792125	A02	4899160	10.4629	****				AX-176815768	A02	86069667	9.43954	****				AX-147216253	A03	20054501	9.09063	****				AX-147218852	A04	841579	2.65121
AX-147212981	A02	5238703	10.9155	****				AX-176797275	A02	86659682	12.7128	****				AX-147216272	A03	20811542	9.3312	****				AX-147218905	A04	1330996	2.58909
AX-147212990	A02	5270226	10.9094	****				AX-147214925	A02	87417752	10.0613	****				AX-176791993	A03	21813574	18.0975	****				AX-147218913	A04	1362368	2.58821
AX-147213014	A02	5535443	10.9698	****				AX-176808199	A02	89078850	11.4387	****				AX-147216341	A03	22722576	9.0789	****				AX-147218916	A04	1428407	2.67822
AX-147213017	A02	5537506	10.9698	****				AX-147215014	A02	89159922	12.1443	****				AX-176805403	A03	22782677	9.0789	****				AX-147218960	A04	1903375	2.53252
AX-147213029	A02	5597149	10.9546	****				AX-176791419	A02	90812650	11.9282	****				AX-147216380	A03	24640457	10.4996	****				AX-147218990	A04	2341583	2.81047
AX-177643693	A02	5796224	10.5766	****				AX-147215181	A02	91638679	15.3368	****				AX-147216499	A03	27510630	18.0006	****				AX-147219040	A04	2755924	2.96166
AX-177643707	A02	5816135	10.5674	****				AX-147215210	A02	92077207	2.16217					AX-147216512	A03	27813965	9.0789	****				AX-147219071	A04	2986913	3.39924	***
AX-147213119	A02	6341150	10.5209	****				AX-147242811	A02	92317831	2.66494					AX-176809707	A03	27858345	9.07888	****				AX-147219075	A04	3019208	3.39925	***
AX-147213146	A02	6593512	10.4618	****				AX-147242820	A02	92612264	1.19923					AX-147216517	A03	28031240	9.07888	****				AX-147219127	A04	3517899	4.29202	****
AX-147213155	A02	6827826	11.0743	****				AX-147215231	A02	92958971	1.35767					AX-147216537	A03	28985376	9.07889	****				AX-147219138	A04	3712941	4.29207	****
AX-147213230	A02	8195496	10.588	****				AX-147215261	A02	93790795	1.35866					AX-176808649	A03	29487939	9.00331	****				AX-147246852	A04	4182894	3.79589	***
AX-147213245	A02	8377985	10.5858	****												AX-176816872	A03	29641485	9.21074	****				AX-147219161	A04	4216107	3.25374	***
AX-147213292	A02	8798082	10.1675	****				AX-147215287	A03	263799	1.18085					AX-176803667	A03	31870379	9.7378	****				AX-147219234	A04	5649484	4.18091	****
AX-147213317	A02	9782639	10.9555	****				AX-147215321	A03	679404	1.65612					AX-147216663	A03	33077138	8.83153	****				AX-147219235	A04	5659551	4.22249	****
AX-147213328	A02	10054069	15.0236	****				AX-176808280	A03	1215455	1.46361					AX-176821107	A03	34011390	8.94878	****				AX-147219264	A04	6680088	3.47083	***
AX-147213472	A02	14937685	10.6614	****				AX-147215412	A03	1816539	1.14428					AX-176804002	A03	38187883	8.93772	****				AX-147219321	A04	7370876	3.15233
AX-147213476	A02	14943833	10.6613	****				AX-147215423	A03	1954749	1.14163					AX-176814356	A03	42785336	9.1391	****				AX-147219466	A04	10403187	3.20777	***
AX-147213604	A02	25951674	11.5183	****				AX-147215426	A03	1989523	1.14359					AX-176792425	A03	61827387	9.13294	****				AX-147219503	A04	12230276	3.20765	***
AX-147213615	A02	28157230	10.6317	****				AX-147215435	A03	2018420	1.13867					AX-176799401	A03	67200396	16.4566	****				AX-147219517	A04	12779729	2.94213
AX-147213631	A02	28574740	10.6317	****				AX-147215548	A03	3445290	1.09641					AX-147217043	A03	71754595	9.07927	****				AX-147219535	A04	13743326	2.9422
AX-176799890	A02	30279507	12.6347	****				AX-147215573	A03	3808006	1.13254					AX-147217102	A03	85054303	9.07888	****				AX-176817088	A04	15704111	1.85912
AX-176807891	A02	32202107	8.70984	****				AX-147215631	A03	4763112	1.17252					AX-147217108	A03	85255264	9.07889	****				AX-176794358	A04	18231560	1.33798
AX-176806576	A02	33864947	7.24165	****				AX-147243456	A03	5098297	1.04537					AX-176805622	A03	91599139	4.48289	****				AX-147219646	A04	18406467	0.705948
AX-147213672	A02	36455473	10.6208	****				AX-147215688	A03	6058658	1.13238					AX-147217149	A03	94046003	7.76368	****				AX-147219761	A04	26018057	0.52501
AX-147213689	A02	39267704	11.1083	****				AX-176795320	A03	6247470	1.12935					AX-176819273	A03	96285079	8.31682	****				AX-176819555	A04	29697050	0.395985
AX-147213719	A02	42029329	10.3564	****				AX-147216005	A03	12100920	1.13175					AX-176811743	A03	96366712	9.35783	****				AX-176794649	A04	29697085	0.382962
AX-147213736	A02	43374948	10.6502	****				AX-147216011	A03	12163967	1.1321					AX-147217180	A03	100096163	8.53013	****				AX-147219833	A04	31201580	0.49835
AX-147213756	A02	47309222	10.9572	****				AX-147216035	A03	12860261	1.13377					AX-147217191	A03	100932532	8.5292	****				AX-176793200	A04	35343227	0.644514
AX-176810943	A02	50000826	10.6083	****				AX-147216048	A03	13165005	1.13316					AX-176794257	A03	103319854	10.0006	****				AX-147219924	A04	39355923	0.914159
AX-147213789	A02	52237448	11.101	****				AX-176806944	A03	19855856	0.874797					AX-176812740	A03	105399156	9.4911	****				AX-147219969	A04	43910476	0.413118
AX-176808317	A02	61811601	0.375627					AX-147244080	A03	19856824	0.837623					AX-176803961	A03	105428219	9.45937	****				AX-147219994	A04	44691344	0.0882685
AX-176823269	A02	62077250	0.472513					AX-176816839	A03	19857137	0.837639					AX-147217299	A03	108830624	17.9926	****				AX-176795801	A04	45012391	0.20457
AX-147213949	A02	64315367	13.6265	****				AX-147216253	A03	20054501	1.07684					AX-147217342	A03	110293559	9.08077	****				AX-147247611	A04	46297588	0.284274
AX-147213981	A02	66368426	11.1657	****				AX-147216272	A03	20811542	1.26867					AX-176792070	A03	112869336	9.09668	****				AX-176822168	A04	50533675	0.278521
AX-147213986	A02	67017415	11.5673	****				AX-176791993	A03	21813574	2.12551					AX-147217486	A03	115670557	9.58318	****				AX-147220040	A04	53185121	0.313184
AX-176799928	A02	67418357	16.9197	****				AX-147216341	A03	22722576	1.0817					AX-147217578	A03	117747708	9.23637	****				AX-147220067	A04	61632456	0.38897
AX-147214000	A02	67418862	12.3311	****				AX-176805403	A03	22782677	1.0723					AX-176811039	A03	118006557	9.18208	****				AX-176798038	A04	61990112	0.37181
AX-147214001	A02	67418874	11.5339	****				AX-147216380	A03	24640457	1.08173					AX-147217602	A03	118027452	9.19551	****				AX-147220074	A04	62753825	0.400928
AX-147214003	A02	67420486	11.54	****				AX-147216499	A03	27510630	1.29743					AX-147217603	A03	118029011	9.21479	****				AX-176794277	A04	71833835	0.367894
AX-147214004	A02	67420580	11.8539	****				AX-147216512	A03	27813965	1.68679					AX-147217621	A03	118410190	9.07892	****				AX-176801614	A04	72118706	0.5568
AX-176806977	A02	73927285	12.576	****				AX-176809707	A03	27858345	1.63874					AX-147217666	A03	119191245	9.07888	****				AX-147220154	A04	76565873	0.401541
AX-147214185	A02	75731986	11.4844	****				AX-147216517	A03	28031240	1.65005					AX-147217690	A03	119760138	9.07894	****				AX-147220181	A04	78282956	0.314766
AX-147214234	A02	78187923	11.0375	****				AX-147216537	A03	28985376	1.62887					AX-176814835	A03	120779244	11.8026	****				AX-147220197	A04	80024591	0.273814
AX-147241878	A02	79414030	11.7477	****				AX-176808649	A03	29487939	1.42388					AX-176816506	A03	129244646	1.93136					AX-147220228	A04	82482114	0.192616
AX-147241920	A02	80297365	14.3943	****				AX-176816872	A03	29641485	1.21015													AX-147220250	A04	85249177	0.321637
AX-176810329	A02	80730421	14.8436	****				AX-176803667	A03	31870379	1.48995					AX-147218747	A04	105953	7.93163	****				AX-147220275	A04	88047543	0.440018
AX-147214462	A02	81019015	15.3333	****				AX-147216663	A03	33077138	1.81858					AX-147218752	A04	162912	8.32582	****				AX-147220290	A04	89924581	0.216078
AX-147214521	A02	81609784	10.9895	****				AX-176821107	A03	34011390	16.7928	****				AX-147218758	A04	186370	8.32596	****				AX-176807447	A04	90141686	0.205018
AX-176803866	A02	82726495	11.5567	****				AX-176804002	A03	38187883	1.61927					AX-147246426	A04	376077	9.4659	****				AX-176817223	A04	91804337	0.332648
AX-147242084	A02	82726525	11.5567	****				AX-176814356	A03	42785336	1.38709					AX-147218845	A04	814313	9.41995	****				AX-176813726	A04	92635030	0.375204
AX-147214609	A02	82990736	11.9659	****				AX-176792425	A03	61827387	0.784578					AX-147218852	A04	841579	9.43273	****				AX-147220329	A04	92696031	0.36446
AX-147214665	A02	83464195	10.9835	****				AX-176799401	A03	67200396	1.19676					AX-147218905	A04	1330996	9.43274	****				AX-176819415	A04	95000363	0.364433
AX-147242202	A02	84827010	11.0065	****				AX-147217043	A03	71754595	2.07084					AX-147218913	A04	1362368	9.43274	****				AX-176800379	A04	103831183	0.485014
AX-147242208	A02	84880919	11.0117	****				AX-147217102	A03	85054303	1.78555					AX-147218916	A04	1428407	9.43274	****				AX-147220481	A04	103964432	0.417345
AX-177641619	A02	85209133	12.3312	****				AX-147217108	A03	85255264	1.78637					AX-147218960	A04	1903375	9.43275	****				AX-147220500	A04	104172441	0.42178
AX-147214809	A02	85315365	11.4486	****				AX-176805622	A03	91599139	18.718	****				AX-147218990	A04	2341583	9.43275	****				AX-176807803	A04	105896594	0.458011
AX-147214811	A02	85316535	11.4486	****				AX-147217149	A03	94046003	2.56295					AX-147219040	A04	2755924	9.43274	****				AX-176807781	A04	107069698	0.470004
AX-176815768	A02	86069667	11.0752	****				AX-176819273	A03	96285079	3.57551					AX-147219071	A04	2986913	9.43274	****				AX-147220633	A04	108230713	0.362499
AX-176797275	A02	86659682	14.9566	****				AX-176811743	A03	96366712	8.8354	****				AX-147219075	A04	3019208	9.43273	****				AX-147220708	A04	110684871	0.42787
AX-147214925	A02	87417752	10.5972	****				AX-147217180	A03	100096163	1.79528					AX-147219127	A04	3517899	8.22842	****				AX-176812660	A04	111718457	0.314895
AX-176808199	A02	89078850	10.9365	****				AX-147217191	A03	100932532	1.89933					AX-147219138	A04	3712941	8.22839	****				AX-147220775	A04	112403290	0.226669
AX-147215014	A02	89159922	10.7027	****				AX-176812740	A03	105399156	1.11667					AX-147246852	A04	4182894	8.2879	****				AX-147248335	A04	112468907	0.23484
AX-176791419	A02	90812650	11.4479	****				AX-147217299	A03	108830624	1.51716					AX-147219161	A04	4216107	5.64385	****				AX-147220802	A04	112877017	0.231607
AX-147215181	A02	91638679	10.0524	****				AX-147217342	A03	110293559	1.77392					AX-147219235	A04	5659551	4.21084	****				AX-147248386	A04	113653210	0.123034
AX-147215210	A02	92077207	0.51739					AX-176792070	A03	112869336	1.77379					AX-147219264	A04	6680088	4.3136	****				AX-147220883	A04	114359220	0.178904
AX-147242820	A02	92612264	0.418979					AX-147217486	A03	115670557	1.77394					AX-147219321	A04	7370876	4.31386	****				AX-176820963	A04	115830024	0.796997
AX-147215231	A02	92958971	0.287441					AX-147217578	A03	117747708	1.50605					AX-147219466	A04	10403187	5.38053	****				AX-147220968	A04	116352006	0.0953608
AX-147215261	A02	93790795	1.19086					AX-176811039	A03	118006557	1.42417					AX-147219503	A04	12230276	5.38047	****				AX-147221103	A04	118778510	0.491974
								AX-147217602	A03	118027452	1.48033					AX-147219517	A04	12779729	5.38039	****				AX-147221108	A04	118822674	0.507618
AX-147215287	A03	263799	0.350614					AX-147217603	A03	118029011	1.48165					AX-147219535	A04	13743326	5.38039	****				AX-176796255	A04	119011071	0.511529
AX-147215321	A03	679404	0.350642					AX-147217621	A03	118410190	1.81024					AX-176817088	A04	15704111	5.24898	****				AX-147221200	A04	119664996	0.522247
AX-176808280	A03	1215455	0.821462					AX-147217666	A03	119191245	1.94566					AX-147219646	A04	18406467	5.41845	****				AX-147221205	A04	119691567	0.525848
AX-147215412	A03	1816539	0.930525					AX-147217690	A03	119760138	1.83916					AX-147219761	A04	26018057	5.41843	****				AX-176791878	A04	120555571	0.525852
AX-147215423	A03	1954749	0.930523					AX-176814835	A03	120779244	0.892413					AX-176819555	A04	29697050	5.21471	****				AX-176815295	A04	120669932	0.525852
AX-147215426	A03	1989523	0.886913					AX-147217893	A03	124388226	0.537813					AX-176794649	A04	29697085	5.20339	****				AX-176820308	A04	120783536	0.238137
AX-147215435	A03	2018420	0.890708					AX-176800613	A03	124936689	0.426426					AX-147219833	A04	31201580	5.30454	****				AX-147221342	A04	121133496	0
AX-147215548	A03	3445290	0.517419					AX-147218000	A03	125668369	1.92233					AX-147219969	A04	43910476	5.30556	****				AX-147221410	A04	122540803	0
AX-147215573	A03	3808006	0.602963					AX-147218048	A03	126684767	1.76469					AX-147247611	A04	46297588	8.61346	****
AX-147215631	A03	4763112	0.460644					AX-147218077	A03	127096366	1.76463					AX-147220040	A04	53185121	5.30469	****
AX-147243456	A03	5098297	0.45332					AX-147218089	A03	127285279	1.24564					AX-147220067	A04	61632456	5.32608	****				AX-147224270	A06	2747003	0.191072
AX-147215688	A03	6058658	0.525255					AX-147218118	A03	127612693	1.61558					AX-147220074	A04	62753825	5.3045	****				AX-147224280	A06	2863952	0.180102
AX-176795320	A03	6247470	0.44517					AX-147218132	A03	127785012	1.33509					AX-176794277	A04	71833835	5.93949	****				AX-176816233	A06	2915219	0.201432
AX-147216005	A03	12100920	0.521689					AX-147218152	A03	128169984	1.82075					AX-176801614	A04	72118706	5.30518	****				AX-147224316	A06	3474367	0.127846
AX-147216011	A03	12163967	0.485328					AX-147218253	A03	129126195	1.87574					AX-147220154	A04	76565873	5.30445	****				AX-147224370	A06	4261015	0.0836691
AX-147216035	A03	12860261	0.497088					AX-176816506	A03	129244646	0.195779					AX-147220197	A04	80024591	5.25607	****				AX-147224372	A06	4280783	0.0836699
AX-147216048	A03	13165005	0.307676					AX-147218304	A03	129649608	0.790904					AX-147220250	A04	85249177	5.30443	****				AX-147224420	A06	4687980	1.04407
AX-176806944	A03	19855856	0.30752					AX-147218365	A03	130403989	1.57064					AX-147220275	A04	88047543	5.01196	****				AX-147224485	A06	5405523	0.0728949
AX-147244080	A03	19856824	0.30752					AX-147218409	A03	130991357	0.550223					AX-147220290	A04	89924581	5.30467	****				AX-147224487	A06	5411401	0.0719224
AX-176816839	A03	19857137	0.30752					AX-147218439	A03	131460394	0.659807					AX-176817223	A04	91804337	5.30474	****				AX-147224507	A06	5789236	0.0541317
AX-147216253	A03	20054501	0.468863					AX-147218442	A03	131479751	0.61068					AX-176813726	A04	92635030	6.33934	****				AX-147224542	A06	6374094	0.0245183
AX-147216272	A03	20811542	0.406479					AX-147218446	A03	131522694	0.414665					AX-147220329	A04	92696031	6.33935	****				AX-147224620	A06	7334057	0.0176102
AX-176791993	A03	21813574	0.189131													AX-176819415	A04	95000363	6.33941	****				AX-147224636	A06	7672324	0.0456853
AX-147216341	A03	22722576	0.569966					AX-147218747	A04	105953	19.4039	****				AX-176800379	A04	103831183	10.3785	****				AX-147224664	A06	8149649	0.0512633
AX-176805403	A03	22782677	0.55882					AX-147218752	A04	162912	10.7909	****				AX-147220481	A04	103964432	6.37965	****				AX-147224737	A06	9574526	0.14218
AX-147216380	A03	24640457	0.523225					AX-147218758	A04	186370	10.7908	****				AX-147220500	A04	104172441	6.37011	****				AX-147224808	A06	10688288	0.0757986
AX-147216499	A03	27510630	0.664431					AX-147246426	A04	376077	11.4396	****				AX-176807803	A04	105896594	8.96402	****				AX-147224896	A06	11846893	0.435689
AX-147216512	A03	27813965	0.408518					AX-147218852	A04	841579	11.7317	****				AX-147220633	A04	108230713	6.36026	****				AX-147224945	A06	12964569	0.0517001
AX-176809707	A03	27858345	0.417904					AX-147218905	A04	1330996	10.3042	****				AX-147220708	A04	110684871	6.3605	****				AX-176801863	A06	14539952	0.0742468
AX-147216517	A03	28031240	0.385184					AX-147218913	A04	1362368	10.3053	****				AX-176812660	A04	111718457	10.445	****				AX-147225078	A06	15715130	0.0246519
AX-147216537	A03	28985376	0.522919					AX-147218916	A04	1428407	10.2847	****				AX-147220775	A04	112403290	6.36001	****				AX-176819641	A06	16065445	0.0351539
AX-176808649	A03	29487939	0.458964					AX-147218960	A04	1903375	10.2847	****				AX-147248335	A04	112468907	6.35999	****				AX-147225104	A06	16428344	0.0392936
AX-176816872	A03	29641485	0.480417					AX-147218990	A04	2341583	10.2847	****				AX-147220802	A04	112877017	6.36	****				AX-147225232	A06	20970182	0.110435
AX-176803667	A03	31870379	0.781822					AX-147219040	A04	2755924	10.2665	****				AX-147248386	A04	113653210	6.35323	****				AX-176820316	A06	24872134	0.70301
AX-147216663	A03	33077138	0.52556					AX-147219071	A04	2986913	10.2667	****				AX-147220883	A04	114359220	6.35697	****				AX-147225325	A06	32572657	0.189709
AX-176821107	A03	34011390	7.18743	****				AX-147219075	A04	3019208	10.2587	****												AX-176792088	A06	34785196	0.226405
AX-176804002	A03	38187883	0.528437					AX-147219127	A04	3517899	11.1681	****				AX-147224270	A06	2747003	3.01608					AX-147225334	A06	34826404	0.200561
AX-176814356	A03	42785336	0.37924					AX-147219138	A04	3712941	11.168	****				AX-147224280	A06	2863952	3.01576					AX-177638959	A06	41229012	0.317185
AX-176792425	A03	61827387	0.578109					AX-147246852	A04	4182894	9.60495	****				AX-176816233	A06	2915219	3.01608					AX-176808798	A06	51690304	0.169757
AX-176799401	A03	67200396	0.392108					AX-147219161	A04	4216107	9.26564	****				AX-147224316	A06	3474367	3.01609					AX-147225368	A06	52572560	0.148708
AX-147217043	A03	71754595	0.528362					AX-147219235	A04	5659551	8.73773	****				AX-147224370	A06	4261015	3.01608					AX-147225443	A06	66423228	0.135943
AX-147217102	A03	85054303	0.528579					AX-147219264	A04	6680088	10.6446	****				AX-147224372	A06	4280783	3.01607					AX-176795818	A06	69243064	0.228183
AX-147217108	A03	85255264	0.714792					AX-147219321	A04	7370876	10.6468	****				AX-147224420	A06	4687980	5.01787	****				AX-176796576	A06	69243068	0.22818
AX-176805622	A03	91599139	3.83528	***				AX-147219466	A04	10403187	11.3565	****				AX-147224485	A06	5405523	2.91589					AX-147225464	A06	69465627	0.150231
AX-147217149	A03	94046003	0.25075					AX-147219503	A04	12230276	11.1549	****				AX-147224487	A06	5411401	3.01608					AX-147225589	A06	79848717	0.156704
AX-176819273	A03	96285079	0.534241					AX-147219517	A04	12779729	16.5584	****				AX-147224507	A06	5789236	3.01608					AX-147225594	A06	79851479	0.174116
AX-176811743	A03	96366712	2.07416					AX-147219535	A04	13743326	15.5062	****				AX-147224542	A06	6374094	3.01616					AX-176817648	A06	79933722	0.080316
AX-147217180	A03	100096163	0.528366					AX-176817088	A04	15704111	9.21742	****				AX-147224620	A06	7334057	4.38472	****				AX-147225614	A06	80755197	0.15911
AX-147217191	A03	100932532	0.528364					AX-147219646	A04	18406467	8.71547	****				AX-147224636	A06	7672324	2.88291					AX-147225650	A06	82779126	0.177786
AX-176812740	A03	105399156	0.356898					AX-147219761	A04	26018057	8.41639	****				AX-147224664	A06	8149649	2.9145					AX-147225651	A06	82779734	0.177786
AX-176803961	A03	105428219	0.225722					AX-176819555	A04	29697050	7.60862	****				AX-147224737	A06	9574526	2.99549					AX-147225660	A06	83182983	0.177786
AX-147217299	A03	108830624	0.418012					AX-176794649	A04	29697085	7.60862	****				AX-147224808	A06	10688288	3.35868	***				AX-177642422	A06	84013115	0.217159
AX-147217342	A03	110293559	0.687374					AX-147219817	A04	30093493	7.26059	****				AX-147224896	A06	11846893	3.63479	***				AX-176811797	A06	85149263	0.57229
AX-176792070	A03	112869336	0.695787					AX-147219833	A04	31201580	8.56584	****				AX-147224945	A06	12964569	3.64179	***				AX-147225729	A06	86792360	1.08847
AX-147217486	A03	115670557	0.633287					AX-147219969	A04	43910476	8.60531	****				AX-176801863	A06	14539952	7.69791	****				AX-147225805	A06	91658393	0.809199
AX-147217578	A03	117747708	0.671695					AX-147247611	A04	46297588	13.316	****				AX-147225078	A06	15715130	4.59292	****				AX-176798419	A06	92280811	2.48834
AX-176811039	A03	118006557	0.695297					AX-147220040	A04	53185121	8.71663	****				AX-176819641	A06	16065445	8.09398	****				AX-176798717	A06	93862557	3.24619	***
AX-147217602	A03	118027452	0.695297					AX-147220067	A04	61632456	8.67747	****				AX-147225104	A06	16428344	3.54662	***				AX-176796367	A06	94129577	0.231027
AX-147217603	A03	118029011	0.695297					AX-147220074	A04	62753825	8.83561	****				AX-147225232	A06	20970182	3.65352	***				AX-176808608	A06	97062653	0.300465
AX-147217621	A03	118410190	0.701988					AX-176794277	A04	71833835	8.61426	****				AX-147225325	A06	32572657	3.65351	***				AX-147225934	A06	97902979	0.707135
AX-147217666	A03	119191245	0.70199					AX-176801614	A04	72118706	13.0965	****				AX-147225334	A06	34826404	3.65337	***				AX-147225935	A06	97904366	0.707639
AX-147217690	A03	119760138	0.701979					AX-147220154	A04	76565873	8.30797	****				AX-177638959	A06	41229012	10.7135	****				AX-147225977	A06	98751250	0.671637
AX-176814835	A03	120779244	0.212298					AX-147220197	A04	80024591	8.24403	****				AX-176808798	A06	51690304	10.8548	****				AX-147225997	A06	99250062	0.671643
AX-147217893	A03	124388226	0.313426					AX-147220250	A04	85249177	8.24037	****				AX-147225368	A06	52572560	3.21265					AX-147226002	A06	99493705	0.733474
AX-176800613	A03	124936689	0.203					AX-147220275	A04	88047543	8.37657	****				AX-147225443	A06	66423228	3.4923	***				AX-176802106	A06	99772542	0.733482
AX-147218000	A03	125668369	0.202992					AX-147220290	A04	89924581	8.33417	****				AX-176795818	A06	69243064	6.2198	****				AX-147226037	A06	100317242	0.737843
AX-147218048	A03	126684767	0.202981					AX-176817223	A04	91804337	8.38206	****				AX-176796576	A06	69243068	6.22032	****				AX-147226076	A06	101146798	0.714914
AX-147218077	A03	127096366	0.202992					AX-176813726	A04	92635030	7.94126	****				AX-147225464	A06	69465627	2.44829					AX-147226086	A06	101300979	0.720624
AX-147218089	A03	127285279	0.221339					AX-147220329	A04	92696031	7.94127	****				AX-147225589	A06	79848717	5.58163	****				AX-147226154	A06	102679941	0.772055
AX-147218118	A03	127612693	0.202996					AX-176819415	A04	95000363	7.94014	****				AX-147225594	A06	79851479	5.11792	****				AX-147226157	A06	102694392	0.781295
AX-147218132	A03	127785012	0.202996					AX-176800379	A04	103831183	11.4013	****				AX-176817648	A06	79933722	5.26391	****				AX-147226178	A06	103181434	0.768935
AX-147218152	A03	128169984	0.202993					AX-147220481	A04	103964432	6.45698	****				AX-147225614	A06	80755197	2.96222					AX-147226189	A06	103342388	0.768936
AX-147218253	A03	129126195	0.120745					AX-147220500	A04	104172441	6.46808	****				AX-147225650	A06	82779126	3.65351	***				AX-176821210	A06	104836791	2.89479
AX-176816506	A03	129244646	0.989133					AX-176795032	A04	105034243	5.2246	****				AX-147225651	A06	82779734	3.65351	***				AX-147253814	A06	105027171	0.883746
AX-147218304	A03	129649608	0.233583					AX-176807803	A04	105896594	4.49591	***				AX-147225660	A06	83182983	3.54221	***				AX-147226288	A06	105029082	0.881808
AX-147218365	A03	130403989	0.215726					AX-147220633	A04	108230713	5.70548	****				AX-147225729	A06	86792360	6.03834	****				AX-147226305	A06	105157006	1.02007
AX-147218409	A03	130991357	1.03732					AX-147220708	A04	110684871	6.43176	****				AX-147225805	A06	91658393	2.9416					AX-147226332	A06	105470812	0.89808
AX-147218439	A03	131460394	1.22675					AX-176812660	A04	111718457	6.46064	****				AX-176798419	A06	92280811	6.45546	****				AX-176817780	A06	106951673	0.657196
AX-147218442	A03	131479751	1.2152					AX-147220775	A04	112403290	6.52273	****				AX-176796367	A06	94129577	3.20779					AX-147253944	A06	107413089	0.550363
AX-147218446	A03	131522694	1.20761					AX-147248335	A04	112468907	6.47654	****				AX-176808608	A06	97062653	2.97988					AX-147226446	A06	107413443	0.181629
AX-147218483	A03	131858812	1.18819					AX-147220802	A04	112877017	6.23929	****				AX-147225934	A06	97902979	2.88433					AX-176799154	A06	108736195	0.185004
AX-176793476	A03	132068349	0.87506					AX-147248386	A04	113653210	6.20788	****				AX-147225935	A06	97904366	2.88407					AX-176800832	A06	109385384	2.17488
AX-147218506	A03	132428208	1.16792					AX-147220883	A04	114359220	6.04882	****				AX-147225977	A06	98751250	2.88405					AX-147226687	A06	110550534	0.83765
AX-176820083	A03	132658592	1.32763					AX-176820963	A04	115830024	0.936336					AX-147225997	A06	99250062	2.88405					AX-147226692	A06	110634476	0.822422
AX-147218617	A03	133464199	1.41023					AX-147221205	A04	119691567	2.1015					AX-147226002	A06	99493705	2.88407					AX-147254213	A06	110636015	0.822422
AX-147218728	A03	134516054	1.20994					AX-176791878	A04	120555571	1.67376					AX-176802106	A06	99772542	2.92364					AX-176811381	A06	110707714	0.822422
AX-147218741	A03	134818517	1.25089					AX-176815295	A04	120669932	1.61037					AX-147226037	A06	100317242	1.68204					AX-147254224	A06	110755932	0.817628
								AX-176820308	A04	120783536	2.1779					AX-147226076	A06	101146798	1.57076					AX-147254235	A06	110815427	0.822422
AX-147218747	A04	105953	2.378					AX-147221342	A04	121133496	2.01852					AX-147226086	A06	101300979	1.57678					AX-147226719	A06	110816722	0.822381
AX-147218752	A04	162912	2.26322					AX-147221410	A04	122540803	1.59894					AX-147226154	A06	102679941	1.80018					AX-147226720	A06	110820404	0.82252
AX-147218758	A04	186370	2.25946													AX-147226157	A06	102694392	1.6556					AX-147226730	A06	110905105	0.822422
AX-147246426	A04	376077	2.1537					AX-147221634	A05	6930207	1.30862					AX-147226178	A06	103181434	1.95663					AX-176805754	A06	110975358	0.822419
AX-147218852	A04	841579	1.11596					AX-147221653	A05	7294750	0.92393					AX-147226189	A06	103342388	1.95666					AX-147226816	A06	112388824	0.393807
AX-147218905	A04	1330996	1.34437					AX-147249099	A05	7391321	0.881809					AX-176821210	A06	104836791	5.54359	****				AX-147226820	A06	112447942	0.42722
AX-147218913	A04	1362368	1.34402					AX-147221675	A05	7804927	0.730837					AX-147253814	A06	105027171	1.95901
AX-147218916	A04	1428407	1.31186					AX-147221688	A05	7958564	0.980085					AX-147226288	A06	105029082	1.95666
AX-147218960	A04	1903375	1.7053					AX-147221702	A05	8422937	0.912998					AX-147226305	A06	105157006	1.02058					AX-176820766	A10	7984682	4.42942	****
AX-147218990	A04	2341583	1.38142					AX-147221713	A05	8621849	0.977409					AX-147226332	A06	105470812	1.95639					AX-176796506	A10	18066033	0.640444
AX-147219040	A04	2755924	1.58669					AX-147223282	A05	93958482	0.607474					AX-176817780	A06	106951673	1.36151					AX-147241244	A10	57142266	0.66199
AX-147219071	A04	2986913	2.30057					AX-176814728	A05	97045943	0.668564					AX-147253944	A06	107413089	2.06267					AX-176795549	A10	95250338	0.318389
AX-147219075	A04	3019208	2.35635					AX-147250292	A05	100941646	0.174631					AX-147226446	A06	107413443	2.06124
AX-147219127	A04	3517899	3.81656	***												AX-176799154	A06	108736195	2.12391
AX-147219138	A04	3712941	4.02449	***				AX-147224270	A06	2747003	8.48177	****				AX-176800832	A06	109385384	4.42556	****				AX-147237421	B01	324682	3.23791	***
AX-147246852	A04	4182894	3.80844	***				AX-147224280	A06	2863952	8.47639	****				AX-147226687	A06	110550534	1.58305					AX-147237432	B01	525042	3.54585	***
AX-147219161	A04	4216107	3.42882					AX-176816233	A06	2915219	8.47662	****				AX-147226692	A06	110634476	1.5789					AX-147237458	B01	769119	3.52957	***
AX-147219235	A04	5659551	4.14011	***				AX-147224316	A06	3474367	8.34086	****				AX-147254213	A06	110636015	1.5905					AX-147237465	B01	896297	3.52957	***
AX-147219264	A04	6680088	5.37447	****				AX-147224370	A06	4261015	8.00867	****				AX-176811381	A06	110707714	0.615939					AX-147209810	B01	1128855	3.42766	***
AX-147219321	A04	7370876	5.26653	****				AX-147224372	A06	4280783	8.00527	****				AX-147254224	A06	110755932	0.661183					AX-147237495	B01	1220452	3.42257	***
AX-147219466	A04	10403187	5.9023	****				AX-147224420	A06	4687980	10.971	****				AX-147254235	A06	110815427	0.649149					AX-147209678	B01	1431059	3.34622	***
AX-147219503	A04	12230276	5.33512	****				AX-147224485	A06	5405523	8.63486	****				AX-147226719	A06	110816722	0.649149					AX-147237529	B01	1453243	3.28176	***
AX-147219517	A04	12779729	4.54867	****				AX-147224487	A06	5411401	8.63507	****				AX-147226720	A06	110820404	0.646439					AX-147237587	B01	2102983	3.65676	***
AX-147219535	A04	13743326	4.63411	****				AX-147224507	A06	5789236	8.81275	****				AX-147226730	A06	110905105	0.576359					AX-147224970	B01	27441886	0.026977
AX-176817088	A04	15704111	5.04809	****				AX-147224542	A06	6374094	7.454	****				AX-176805754	A06	110975358	0.57636					AX-147238820	B01	116043545	0.0473778
AX-176794358	A04	18231560	3.70999					AX-147224620	A06	7334057	7.56622	****				AX-147226816	A06	112388824	0.98475					AX-176791457	B01	116719216	0.0473746
AX-147219646	A04	18406467	4.86512	****				AX-147224636	A06	7672324	7.6709	****				AX-147226820	A06	112447942	1.06877					AX-176802580	B01	117112930	0.0211144
AX-147219761	A04	26018057	5.27816	****				AX-147224664	A06	8149649	7.58564	****												AX-176819387	B01	121368506	0.0155264
AX-176819555	A04	29697050	5.66704	****				AX-147224737	A06	9574526	9.97999	****				AX-147232553	A09	6846409	6.0584	****				AX-147238924	B01	121642962	0.0218777
AX-176794649	A04	29697085	5.66692	****				AX-147224808	A06	10688288	7.44147	****				AX-147260196	A09	8267184	2.67107
AX-147219833	A04	31201580	5.58513	****				AX-147224896	A06	11846893	7.03309	****				AX-147232661	A09	8661916	2.76524
AX-147219969	A04	43910476	5.64177	****				AX-147224945	A06	12964569	7.24506	****				AX-176791761	A09	12546411	0.866055					AX-176801528	B03	22308023	2.98672
AX-147247611	A04	46297588	5.44841	****				AX-176801863	A06	14539952	7.34584	****				AX-176797333	A09	20677308	13.9962	****				AX-176796172	B03	22308147	2.98881
AX-147220040	A04	53185121	5.13221	****				AX-147225078	A06	15715130	7.25531	****				AX-177639401	A09	93135689	3.98362	***				AX-176805906	B03	22308199	2.98691
AX-147220067	A04	61632456	5.6345	****				AX-176819641	A06	16065445	7.29094	****				AX-147233670	A09	94328792	3.98343	***				AX-176809312	B03	22308225	2.98357
AX-147220074	A04	62753825	4.94912	****				AX-147225104	A06	16428344	7.2736	****				AX-176822101	A09	97879279	5.8793	****				AX-176791476	B03	135810780	1.2732
AX-176794277	A04	71833835	5.35631	****				AX-147225232	A06	20970182	7.2287	****				AX-147233736	A09	100203544	6.17891	****				AX-147246324	B03	135984987	1.2732
AX-176801614	A04	72118706	5.86583	****				AX-147225325	A06	32572657	7.13425	****				AX-147233752	A09	100681800	4.43254	****
AX-147220154	A04	76565873	5.35799	****				AX-147225334	A06	34826404	7.42165	****				AX-177637511	A09	104608380	5.31945	****
AX-147220197	A04	80024591	5.47168	****				AX-176802937	A06	35694283	6.212	****				AX-147233881	A09	104624029	5.58737	****				AX-147251793	B06	3620645	3.29786	***
AX-147220250	A04	85249177	4.91562	****				AX-177638959	A06	41229012	6.04994	****				AX-177640140	A09	106100105	5.02014	****				AX-147251810	B06	3917236	3.71072	***
AX-147220275	A04	88047543	5.00412	****				AX-176808798	A06	51690304	12.7224	****				AX-147233963	A09	108905759	3.9834	***				AX-147252038	B06	7484274	2.54225
AX-147220290	A04	89924581	5.16975	****				AX-147225368	A06	52572560	7.14217	****				AX-147233992	A09	109699138	3.98333	***				AX-147252098	B06	9318095	3.36187	***
AX-176817223	A04	91804337	4.69155	****				AX-147225443	A06	66423228	7.13999	****				AX-147234017	A09	109977568	3.98335	***				AX-147252228	B06	12281786	2.94201
AX-176813726	A04	92635030	4.7992	****				AX-176795818	A06	69243064	15.281	****				AX-147234159	A09	111972500	2.7633					AX-147252267	B06	13163062	2.91504
AX-147220329	A04	92696031	4.7992	****				AX-176796576	A06	69243068	15.281	****				AX-147234195	A09	112245541	2.71157					AX-147252287	B06	13633699	3.17536
AX-176819415	A04	95000363	4.54735	****				AX-147225464	A06	69465627	6.93786	****				AX-176821396	A09	112528532	2.89092					AX-177640081	B06	13651322	4.20171	****
AX-176800379	A04	103831183	3.78753	***				AX-147225589	A06	79848717	6.69789	****				AX-147262369	A09	113662882	2.73974					AX-147252289	B06	13664789	4.18988	****
AX-147220481	A04	103964432	3.12697					AX-147225594	A06	79851479	7.01696	****				AX-176822907	A09	113714863	2.77851					AX-147252306	B06	13957090	2.95044
AX-147220500	A04	104172441	3.10545					AX-176817648	A06	79933722	9.08166	****				AX-147234336	A09	113715433	2.83012					AX-147252314	B06	14176970	2.77767
AX-176795032	A04	105034243	0.128121					AX-147225614	A06	80755197	7.66743	****				AX-147234385	A09	114515959	6.32836	****				AX-147252329	B06	14374420	2.80093
AX-176807803	A04	105896594	0.475123					AX-147225650	A06	82779126	7.13377	****				AX-176820496	A09	115524842	7.96183	****				AX-147252421	B06	16759789	2.36127
AX-147220633	A04	108230713	2.92653					AX-147225651	A06	82779734	7.13377	****				AX-147234542	A09	116087388	4.14356	***				AX-176795310	B06	22767474	2.36505
AX-147220708	A04	110684871	3.38624					AX-147225660	A06	83182983	7.10503	****				AX-147262112	A09	116264687	5.58237	****				AX-176791924	B06	24364654	3.09803
AX-176812660	A04	111718457	3.10447					AX-176804988	A06	86798706	7.50447	****				AX-147234599	A09	116627090	6.6097	****				AX-147252686	B06	27994454	2.63944
AX-147220775	A04	112403290	3.42398					AX-147225805	A06	91658393	9.66148	****				AX-176792163	A09	116748829	6.2085	****				AX-147252687	B06	27995343	2.63655
AX-147248335	A04	112468907	3.51517					AX-176798419	A06	92280811	10.5639	****				AX-147234740	A09	118577665	5.72823	****				AX-147252778	B06	35075298	0.357175
AX-147220802	A04	112877017	3.26068					AX-176798717	A06	93862557	6.71996	****				AX-147234752	A09	118682014	5.87245	****				AX-147225299	B06	35557239	0.71222
AX-147248386	A04	113653210	3.4243					AX-176796367	A06	94129577	8.40004	****												AX-176815586	B06	37850641	1.52701
AX-147220883	A04	114359220	3.52686					AX-176808608	A06	97062653	8.98893	****												AX-176810808	B06	83007288	4.20512	****
AX-176820963	A04	115830024	0.664955					AX-147225934	A06	97902979	8.29724	****				AX-176820766	A10	7984682	0.936626					AX-147252948	B06	87043539	3.47182	***
AX-147221103	A04	118778510	0.445895					AX-147225935	A06	97904366	8.29671	****				AX-176796506	A10	18066033	0.910534					AX-147252973	B06	89581718	3.72987	***
AX-147221205	A04	119691567	1.41033					AX-147225977	A06	98751250	8.38397	****				AX-176819152	A10	46982226	5.55621	****				AX-176808576	B06	90816220	2.86041
AX-176791878	A04	120555571	1.71154					AX-147225997	A06	99250062	7.8275	****				AX-176795549	A10	95250338	1.3661					AX-176817639	B06	96567520	3.30045	***
AX-176815295	A04	120669932	2.31499					AX-147226002	A06	99493705	7.90113	****				AX-147236856	A10	104674897	6.00625	****				AX-176815067	B06	96597652	3.54558	***
AX-176820308	A04	120783536	1.49295					AX-176802106	A06	99772542	7.87634	****												AX-176791352	B06	103027033	3.37406	***
AX-147221342	A04	121133496	2.44373					AX-147226037	A06	100317242	8.49639	****												AX-147253266	B06	115228228	3.56547	***
AX-147221410	A04	122540803	3.63844					AX-147226076	A06	101146798	8.20252	****				AX-147237421	B01	324682	9.24898	****				AX-147253268	B06	115530806	3.61376	***
								AX-147226086	A06	101300979	8.15061	****				AX-147237432	B01	525042	9.22154	****				AX-147253390	B06	120283916	4.33372	****
AX-147221467	A05	1500438	1.09605					AX-147226154	A06	102679941	7.81313	****				AX-147237458	B01	769119	9.24948	****				AX-147253538	B06	124381466	4.33163	****
AX-147221510	A05	2776748	1.09583					AX-147226178	A06	103181434	7.70372	****				AX-147237465	B01	896297	9.24948	****				AX-147253545	B06	124476859	4.99855	****
AX-147221511	A05	2859361	0.965586					AX-147226189	A06	103342388	7.7482	****				AX-147209810	B01	1128855	9.24948	****				AX-147253575	B06	124770106	5.61183	****
AX-147249011	A05	4294221	0.714541					AX-176821210	A06	104836791	10.5286	****				AX-147237495	B01	1220452	9.21139	****				AX-147253713	B06	127612777	5.08991	****
AX-147221560	A05	4536726	0.781433					AX-147253814	A06	105027171	7.84771	****				AX-147209678	B01	1431059	9.623	****				AX-147253740	B06	128289653	5.31929	****
AX-176791991	A05	5435309	0.600523					AX-147226288	A06	105029082	7.84754	****				AX-147237529	B01	1453243	9.25007	****				AX-176817773	B06	128336903	5.52323	****
AX-147221577	A05	5669888	0.681746					AX-147226305	A06	105157006	8.79645	****				AX-147237587	B01	2102983	9.24974	****				AX-147253745	B06	128352895	5.96337	****
AX-147221580	A05	5802583	0.635739					AX-147226332	A06	105470812	7.67357	****				AX-176791872	B01	5672434	4.60537	****				AX-147253779	B06	128992668	5.86987	****
AX-147221634	A05	6930207	0.635714					AX-176817780	A06	106951673	8.41406	****				AX-147224970	B01	27441886	9.25645	****				AX-176820915	B06	129575475	4.51499	****
AX-147221653	A05	7294750	0.635694					AX-147253944	A06	107413089	9.47892	****				AX-176808043	B01	47005832	13.4678	****				AX-147253886	B06	130343046	4.12193	****
AX-147249099	A05	7391321	0.644532					AX-147226446	A06	107413443	11.8378	****				AX-176815179	B01	65696288	0.0827275					AX-176792416	B06	132386862	3.74992	***
AX-147221675	A05	7804927	0.685083					AX-176799154	A06	108736195	8.91841	****				AX-147214594	B01	69167034	0.0865806					AX-147254039	B06	133321816	4.46555	****
AX-147221688	A05	7958564	0.664281					AX-176800832	A06	109385384	9.78814	****				AX-176808868	B01	113755738	8.10979	****				AX-147254041	B06	133323553	5.28498	****
AX-147221702	A05	8422937	0.647165					AX-176792875	A06	110532902	7.35369	****				AX-147238820	B01	116043545	9.25037	****				AX-147254102	B06	133735471	6.58013	****
AX-147221713	A05	8621849	0.63645					AX-147226687	A06	110550534	7.32943	****				AX-176791457	B01	116719216	8.96053	****				AX-147226599	B06	134109194	4.85562	****
								AX-147226692	A06	110634476	7.34605	****				AX-176802580	B01	117112930	16.2943	****				AX-147254191	B06	135004325	5.26262	****
AX-147224270	A06	2747003	6.3938	****				AX-147254213	A06	110636015	7.34554	****				AX-176819387	B01	121368506	10.0512	****				AX-147254198	B06	135080269	5.30031	****
AX-147224280	A06	2863952	5.77716	****				AX-176811381	A06	110707714	5.86762	****				AX-147238924	B01	121642962	10.1931	****				AX-147226735	B06	135770071	5.03316	****
AX-176816233	A06	2915219	5.65434	****				AX-147254224	A06	110755932	5.90232	****												AX-176791829	B06	135783222	5.03311	****
AX-147224316	A06	3474367	5.56851	****				AX-147254235	A06	110815427	7.09789	****				AX-176806565	B03	22307354	4.84554	****				AX-147226748	B06	135786569	5.03315	****
AX-147224370	A06	4261015	5.38686	****				AX-147226719	A06	110816722	7.09796	****				AX-176801528	B03	22308023	4.68925	****				AX-147226754	B06	135787388	5.03316	****
AX-147224372	A06	4280783	5.39569	****				AX-147226720	A06	110820404	7.09803	****				AX-176796172	B03	22308147	4.70197	****				AX-147226756	B06	135787551	5.03316	****
AX-147224420	A06	4687980	7.05597	****				AX-147226730	A06	110905105	7.09642	****				AX-176805906	B03	22308199	4.70222	****				AX-176815617	B06	135807278	5.00136	****
AX-147224485	A06	5405523	5.40281	****				AX-176805754	A06	110975358	7.11768	****				AX-176809312	B03	22308225	3.76047	***
AX-147224487	A06	5411401	5.40272	****				AX-147226816	A06	112388824	8.02229	****				AX-176801202	B03	22308280	4.16855	***
AX-147224507	A06	5789236	5.53167	****				AX-147226820	A06	112447942	7.3695	****				AX-176806119	B03	22308501	4.14097	***
AX-147224542	A06	6374094	5.5365	****												AX-176811706	B03	35762650	9.02086	****				AX-147259163	B08	121556595	2.08378
AX-147224620	A06	7334057	5.5095	****				AX-147255148	A07	15218169	0.491117					AX-176814342	B03	106248333	13.6384	****				AX-147259182	B08	122223999	1.79219
AX-147224636	A06	7672324	5.55005	****				AX-176806670	A07	17626380	0.634677					AX-147246147	B03	133020199	8.42631	****				AX-147259195	B08	122363848	1.79218
AX-147224664	A06	8149649	5.32613	****				AX-176812595	A07	17643601	0.589825					AX-147218491	B03	133159344	0.100679					AX-147259220	B08	122831418	1.79218
AX-147224737	A06	9574526	6.34346	****				AX-176800052	A07	17707397	0.476827					AX-176802986	B03	133487997	0.0826645					AX-147259221	B08	122897408	1.79218
AX-147224808	A06	10688288	5.89873	****				AX-176808027	A07	17731546	0.477012					AX-147246176	B03	133622000	0.715674					AX-147259300	B08	124336392	1.90668
AX-147224896	A06	11846893	3.16576					AX-176816873	A07	17754802	0.565339					AX-176791476	B03	135810780	8.08015	****				AX-147259351	B08	125473859	1.69891
AX-147224945	A06	12964569	5.48981	****				AX-176804082	A07	17772008	0.568825					AX-147246324	B03	135984987	8.08011	****				AX-176792136	B08	125956737	1.72356
AX-176801863	A06	14539952	4.22168	***				AX-176807727	A07	18169045	0.294961
AX-147225078	A06	15715130	5.10762	****				AX-176809163	A07	18169049	0.294961
AX-176819641	A06	16065445	5.0943	****				AX-176817824	A07	18174560	0.427951					AX-176815769	B05	40374124	2.82286
AX-147225104	A06	16428344	5.29834	****				AX-176820379	A07	18174579	0.427965					AX-147222478	B05	43415063	1.1864					AX-176791703	B10	9968629	3.06442
AX-147225232	A06	20970182	5.26711	****				AX-177640558	A07	18174822	0.543627					AX-176809590	B05	64545278	3.23963					AX-147263446	B10	10717070	2.71805
AX-147225325	A06	32572657	4.81632	****				AX-176803839	A07	18174900	0.545842					AX-147222592	B05	73835105	1.22775					AX-147263491	B10	11214359	2.98032
AX-147225334	A06	34826404	4.68877	****				AX-176815878	A07	18175074	0.545847					AX-176821867	B05	93830809	3.28962					AX-177639192	B10	11960833	2.97387
AX-177638959	A06	41229012	3.23578					AX-176795094	A07	18175193	0.548048					AX-176812700	B05	95397826	3.96889	***				AX-177644269	B10	13247245	2.9736
AX-176808798	A06	51690304	5.42244	****				AX-176794604	A07	18175255	0.414042					AX-147250202	B05	117310886	3.9662	***				AX-176791776	B10	14052510	2.80102
AX-147225368	A06	52572560	4.61639	****				AX-176796760	A07	18175303	0.414042					AX-147250224	B05	118856272	3.9662	***				AX-177642573	B10	14149454	2.32733
AX-147225443	A06	66423228	4.79185	****				AX-176797040	A07	18175313	0.414046					AX-147250318	B05	122956001	3.9662	***				AX-147263607	B10	15189329	2.77227
AX-176795818	A06	69243064	6.45622	****				AX-176794420	A07	18175433	0.346156					AX-147250343	B05	123992671	3.9663	***				AX-176820657	B10	17061918	1.7799
AX-176796576	A06	69243068	6.45625	****				AX-176824167	A07	18175433	0.346156					AX-176800777	B05	125699812	4.08342	***				AX-177639228	B10	19663894	2.5543
AX-147225464	A06	69465627	4.79551	****				AX-177637220	A07	18175548	0.482063					AX-147250415	B05	126784749	4.36646	****				AX-147263769	B10	22491904	2.4721
AX-147225589	A06	79848717	4.07621	***				AX-176802048	A07	18175575	0.482011					AX-147250428	B05	127127435	4.36643	****				AX-176799200	B10	23494035	1.30361
AX-147225594	A06	79851479	4.07577	***				AX-176796811	A07	18175653	0.285072					AX-147250483	B05	130306816	4.36639	****				AX-176792092	B10	25381175	2.48601
AX-176817648	A06	79933722	3.963	***				AX-176801360	A07	18175936	0.266712					AX-147250542	B05	132615089	3.6496	***				AX-147263844	B10	27366049	2.48601
AX-147225614	A06	80755197	4.48544	****				AX-176808628	A07	18175967	0.286921					AX-147250555	B05	133272503	4.3664	****				AX-147264063	B10	60634383	1.91332
AX-147225650	A06	82779126	4.60492	****				AX-176810637	A07	18176260	0.286936					AX-147250568	B05	133901493	4.3667	****				AX-147264064	B10	60634925	1.90455
AX-147225651	A06	82779734	4.60492	****				AX-176802210	A07	18176735	0.395983					AX-147250693	B05	137526639	4.36643	****				AX-176810036	B10	96793488	2.53792
AX-147225660	A06	83182983	4.51849	****				AX-176809363	A07	18176770	0.395989					AX-176791873	B05	137560499	4.36643	****				AX-147264208	B10	101217593	2.5931
AX-176804988	A06	86798706	4.358	****				AX-177639758	A07	18176796	0.395989					AX-147250728	B05	138251806	4.36653	****				AX-177637244	B10	102847093	2.59802
AX-147225805	A06	91658393	5.48403	****				AX-176807286	A07	18176872	0.412967					AX-176799661	B05	142429794	4.71493	****				AX-147264223	B10	102975592	1.80443
AX-176798419	A06	92280811	5.65378	****				AX-176800900	A07	18176883	0.412773					AX-147223970	B05	149108891	2.37973					AX-177638757	B10	106292220	2.52942
AX-176798717	A06	93862557	1.90865					AX-176800881	A07	18176920	0.412773					AX-147223971	B05	149112025	2.52103					AX-147264328	B10	111150033	2.78884
AX-176796367	A06	94129577	6.07359	****				AX-176799773	A07	18176943	0.412773													AX-147264395	B10	113584807	3.0367
AX-176808608	A06	97062653	6.43893	****				AX-176801743	A07	18176946	0.412773													AX-147264423	B10	115758393	2.17602
AX-147225934	A06	97902979	6.43888	****				AX-176800791	A07	18177083	0.399667					AX-147251793	B06	3620645	11.371	****				AX-147264424	B10	115759337	2.17694
AX-147225935	A06	97904366	6.43888	****				AX-176798667	A07	18177119	0.399662					AX-147251810	B06	3917236	11.2572	****				AX-147264426	B10	115833661	2.43797
AX-147225977	A06	98751250	7.51403	****				AX-176797254	A07	18177448	0.298214					AX-176794335	B06	7000834	13.4289	****				AX-177639479	B10	116395569	2.43811
AX-147225997	A06	99250062	6.439	****				AX-176802515	A07	18177486	0.446669					AX-147252038	B06	7484274	12.014	****				AX-147264444	B10	116784871	2.00947
AX-147226002	A06	99493705	6.43893	****				AX-177638153	A07	18177497	0.446669					AX-147252098	B06	9318095	11.547	****				AX-147264511	B10	118693317	2.96017
AX-176802106	A06	99772542	6.43893	****				AX-176807804	A07	18177556	0.512073					AX-147252228	B06	12281786	11.2227	****				AX-176791558	B10	119275183	1.65345
AX-147226037	A06	100317242	6.45753	****				AX-176796200	A07	18177607	0.512073					AX-147252267	B06	13163062	10.9419	****				AX-176791820	B10	123961122	4.01956	****
AX-147226076	A06	101146798	6.96701	****				AX-176813375	A07	18177810	0.512087					AX-147252287	B06	13633699	10.8707	****				AX-147264750	B10	125927111	3.81802	***
AX-147226086	A06	101300979	6.96701	****				AX-176798213	A07	18177857	0.408979					AX-177640081	B06	13651322	10.1236	****				AX-177639345	B10	126150964	3.81924	***
AX-147226154	A06	102679941	6.91766	****				AX-176792710	A07	18178284	0.408821					AX-147252289	B06	13664789	10.1404	****				AX-147264825	B10	128125458	3.34555	***
AX-147226178	A06	103181434	7.94523	****				AX-177638186	A07	18178505	0.408616					AX-147252306	B06	13957090	10.8893	****				AX-176791475	B10	129422452	3.35751	***
AX-147226189	A06	103342388	7.27618	****				AX-176798930	A07	18178701	0.295464					AX-147252314	B06	14176970	10.905	****				AX-147264913	B10	130237287	3.60544	***
AX-147253814	A06	105027171	8.4342	****				AX-176799137	A07	18178777	0.443047					AX-147252329	B06	14374420	10.9188	****				AX-147264945	B10	130799987	3.40567	***
AX-147226288	A06	105029082	8.43419	****				AX-176809341	A07	18178904	0.443051					AX-147252421	B06	16759789	10.9798	****				AX-147265042	B10	131806031	0.316194
AX-147226305	A06	105157006	8.62938	****				AX-176802256	A07	18178939	0.443051					AX-176795310	B06	22767474	5.9692	****				AX-176791882	B10	131908361	0.296784
AX-147226332	A06	105470812	7.21704	****				AX-176801381	A07	18178972	0.443056					AX-176791924	B06	24364654	11.3718	****				AX-177642086	B10	133289435	0.483114
AX-176817780	A06	106951673	7.47891	****				AX-176801587	A07	18179068	0.48506					AX-147252686	B06	27994454	11.3716	****				AX-176791643	B10	133449357	0.642161
AX-147253944	A06	107413089	7.62258	****				AX-176794665	A07	18179069	0.485069					AX-147252687	B06	27995343	11.3716	****				AX-147265254	B10	133759254	0.380695
AX-147226446	A06	107413443	7.62746	****				AX-176798775	A07	18179075	0.485069					AX-147252778	B06	35075298	10.8158	****				AX-147265272	B10	133880109	0.444423
AX-176799154	A06	108736195	7.22293	****				AX-176814859	A07	18179077	0.485077					AX-147225299	B06	35557239	11.1335	****				AX-177643056	B10	133954862	0.439778
AX-176800832	A06	109385384	11.061	****				AX-176806596	A07	18179140	0.485077					AX-176815586	B06	37850641	11.371	****				AX-147265291	B10	133973530	0.441899
AX-176792875	A06	110532902	7.20198	****				AX-176801193	A07	18179160	0.485079					AX-147252948	B06	87043539	10.9062	****				AX-147265307	B10	134076186	0.224367
AX-147226687	A06	110550534	6.64386	****				AX-176799558	A07	18179163	0.485079					AX-147252973	B06	89581718	11.0126	****				AX-147265486	B10	135303526	0.56777
AX-147226692	A06	110634476	6.64332	****				AX-176812902	A07	18179461	0.485085					AX-176808576	B06	90816220	4.71443	****				AX-147265500	B10	135518938	0.72031
AX-147254213	A06	110636015	6.64524	****				AX-176823773	A07	18179526	0.485085					AX-176817639	B06	96567520	12.4367	****				AX-147265510	B10	135552827	0.691502
AX-176811381	A06	110707714	6.64923	****				AX-176811945	A07	18180024	0.485096					AX-176815067	B06	96597652	10.3139	****				AX-177639120	B10	135713446	1.01157
AX-147254224	A06	110755932	6.65397	****				AX-176812952	A07	18180236	0.537757					AX-176791352	B06	103027033	11.197	****				AX-147237311	B10	135771077	1.09557
AX-147254235	A06	110815427	6.64524	****				AX-177638835	A07	18180239	0.537757					AX-147253266	B06	115228228	11.3992	****				AX-147265545	B10	135808237	0.972535
AX-147226719	A06	110816722	6.64524	****				AX-177638848	A07	18180316	0.53835					AX-147253268	B06	115530806	11.4994	****
AX-147226720	A06	110820404	6.64524	****				AX-176793162	A07	18180358	0.538355					AX-147253390	B06	120283916	10.8684	****
AX-147226730	A06	110905105	6.64524	****				AX-176817339	A07	18180594	0.592493					AX-147253538	B06	124381466	10.5336	****
AX-176805754	A06	110975358	6.64522	****				AX-176805557	A07	18180877	0.581959					AX-147253545	B06	124476859	10.5336	****
AX-147226816	A06	112388824	1.37446					AX-176802411	A07	24823307	1.27159					AX-147253575	B06	124770106	11.6101	****
AX-147226820	A06	112447942	1.55901					AX-176801245	A07	26175719	1.16194					AX-147253713	B06	127612777	11.0281	****
								AX-177639461	A07	26203823	1.18632					AX-147253740	B06	128289653	11.0273	****
AX-147226911	A07	1125060	0.659187					AX-176800926	A07	26204759	1.35458					AX-176817773	B06	128336903	11.0288	****
AX-177639366	A07	1207098	0.0343877					AX-177638571	A07	26329688	1.39066					AX-147253745	B06	128352895	11.2641	****
AX-147226980	A07	1715115	0.244424					AX-176817852	A07	28340516	0.0894786					AX-147253779	B06	128992668	11.5262	****
AX-147254503	A07	2502673	0.146785					AX-177642025	A07	34314337	1.11304					AX-176820915	B06	129575475	13.9457	****
AX-147227276	A07	4359598	0.710865					AX-147228270	A07	38770197	1.02344					AX-147253886	B06	130343046	11.7878	****
AX-147227304	A07	4510195	0.871128					AX-176807964	A07	40722763	0.901143					AX-147254039	B06	133321816	11.5674	****
AX-147227318	A07	4560066	0.902019					AX-176797490	A07	40785641	0.527267					AX-147254041	B06	133323553	11.5797	****
AX-147254707	A07	4808653	0.661859					AX-147228382	A07	49949867	0.850895					AX-147254102	B06	133735471	11.5798	****
AX-147227380	A07	5325989	0.0187113					AX-177643396	A07	53903274	1.00213					AX-147226599	B06	134109194	11.5799	****
AX-147227390	A07	5364934	0.567738					AX-177640670	A07	53985964	0.877673					AX-147254191	B06	135004325	11.4921	****
AX-147227391	A07	5372319	0.567739					AX-147258677	A07	53986127	0.953672					AX-147254198	B06	135080269	11.3518	****
AX-147227409	A07	5513063	0.56774					AX-147228550	A07	60064185	1.73998					AX-147226735	B06	135770071	11.9853	****
AX-147227518	A07	6901139	0.3187					AX-147228566	A07	61354243	1.13214					AX-176791829	B06	135783222	11.9858	****
AX-147227580	A07	8218053	0.463132					AX-147228576	A07	62398239	0.930879					AX-147226748	B06	135786569	11.9859	****
AX-147227606	A07	8855622	0.722585					AX-147228586	A07	63674899	1.13246					AX-147226754	B06	135787388	12.1616	****
AX-176803178	A07	9729090	0.41293					AX-147228590	A07	64213755	1.63746					AX-147226756	B06	135787551	12.1616	****
AX-147227676	A07	10930537	0.412929					AX-176820084	A07	64335562	1.79093					AX-176815617	B06	135807278	10.1303	****
AX-177641923	A07	14225134	1.08216					AX-147228634	A07	65957786	1.13224
AX-147227821	A07	14699755	0.397435					AX-147228658	A07	67162381	0.900594
AX-147227833	A07	14860287	1.6083					AX-147228738	A07	69596041	1.11967					AX-176791822	B07	2671333	7.86283	****
AX-147227834	A07	14860341	1.6083					AX-147228759	A07	70123570	0.97731					AX-147227165	B07	3073847	8.44503	****
AX-147227840	A07	15199143	1.35867					AX-147256944	A07	71736391	0.640812					AX-147254570	B07	3080948	8.44504	****
AX-147255148	A07	15218169	1.54326					AX-147228852	A07	72094208	0.263846					AX-147254586	B07	3309551	13.3474	****
AX-147227917	A07	17133488	1.56301													AX-147254636	B07	3941261	8.44529	****
AX-147227919	A07	17218154	1.56914					AX-177639401	A09	93135689	0.0191739					AX-147254688	B07	4382301	8.95866	****
AX-176791685	A07	17302902	1.47962					AX-147233670	A09	94328792	0.0702802					AX-147254706	B07	4673512	9.023	****
AX-176806670	A07	17626380	3.8672	***				AX-176822101	A09	97879279	0.0357527					AX-147254725	B07	5155467	9.023	****
AX-176812595	A07	17643601	3.79646	***				AX-147233736	A09	100203544	0.0431554					AX-147254792	B07	5966992	9.02297	****
AX-176800052	A07	17707397	1.30725					AX-147233752	A09	100681800	0.0618056					AX-147254826	B07	6386807	8.60179	****
AX-176808027	A07	17731546	1.31511					AX-147233881	A09	104624029	0.0618165					AX-147254849	B07	6688891	8.60177	****
AX-177638437	A07	17731627	1.33598					AX-177640140	A09	106100105	0.0370991					AX-147254864	B07	7278391	8.60179	****
AX-176803585	A07	17750686	1.59515					AX-147233961	A09	108869870	0.0847993					AX-147254891	B07	8538334	8.37301	****
AX-176816873	A07	17754802	1.59525					AX-147233963	A09	108905759	0.0618417					AX-147255209	B07	18647940	8.30308	****
AX-147227930	A07	17768688	1.28051					AX-147233992	A09	109699138	0.0618359					AX-176823337	B07	19639295	8.30307	****
AX-176804082	A07	17772008	1.2805					AX-147234017	A09	109977568	0.0618327					AX-177640563	B07	22555654	9.02595	****
AX-176807727	A07	18169045	2.01077					AX-147234159	A09	111972500	0.403222					AX-147255407	B07	27113953	8.30297	****
AX-176809163	A07	18169049	2.01076					AX-147234195	A09	112245541	0.389713					AX-147255421	B07	27860283	8.3035	****
AX-176817824	A07	18174560	2.01076					AX-176821396	A09	112528532	0.748631					AX-177637996	B07	28573469	7.76552	****
AX-176820379	A07	18174579	2.07217					AX-147262369	A09	113662882	0.71629					AX-176791431	B07	31648456	8.66	****
AX-177640558	A07	18174822	2.07218					AX-176822907	A09	113714863	0.687139					AX-147255541	B07	33022904	8.30429	****
AX-176803839	A07	18174900	2.1321					AX-147234336	A09	113715433	0.62701					AX-176791990	B07	36741839	8.4622	****
AX-176815878	A07	18175074	2.17346					AX-147234385	A09	114515959	0.946145					AX-147255657	B07	40161223	8.46222	****
AX-176795094	A07	18175193	2.17346					AX-176820496	A09	115524842	0.637891					AX-177638127	B07	98978807	8.4623	****
AX-176794604	A07	18175255	2.17347					AX-147234542	A09	116087388	0.532364					AX-177641518	B07	104036917	8.45534	****
AX-176796760	A07	18175303	2.27633					AX-147262112	A09	116264687	0.698371					AX-147256076	B07	105566627	8.5026	****
AX-176797040	A07	18175313	2.44617					AX-147234599	A09	116627090	0.8252					AX-176821297	B07	105872336	15.2598	****
AX-176794420	A07	18175433	2.23112					AX-176792163	A09	116748829	0.825204					AX-147256109	B07	106774615	8.46259	****
AX-176824167	A07	18175433	2.22754					AX-147234740	A09	118577665	0.545384					AX-176793978	B07	106851423	8.46276	****
AX-177637220	A07	18175548	2.22669					AX-147234752	A09	118682014	0.545328					AX-176804480	B07	106851536	8.46221	****
AX-176802048	A07	18175575	2.22667													AX-176814221	B07	106851564	8.46221	****
AX-176796811	A07	18175653	1.48454					AX-147234866	A10	373630	1.63013					AX-176806568	B07	113297618	15.5581	****
AX-176801360	A07	18175936	1.42757					AX-177644206	A10	980256	0.760435					AX-147256330	B07	114323477	8.46232	****
AX-176808628	A07	18175967	1.42754					AX-176820766	A10	7984682	12.1348	****				AX-147256340	B07	114490353	8.46229	****
AX-176810637	A07	18176260	1.42754					AX-176803305	A10	12933326	12.9983	****				AX-176812607	B07	115507678	10.8972	****
AX-176802210	A07	18176735	1.42754					AX-176796506	A10	18066033	6.50949	****				AX-147256405	B07	116350309	14.6577	****
AX-176809363	A07	18176770	1.42754					AX-147241244	A10	57142266	6.3098	****				AX-147256413	B07	116532475	8.46388	****
AX-177639758	A07	18176796	1.42757					AX-176799737	A10	66576435	0.822387					AX-147256449	B07	117675646	7.96256	****
AX-176807286	A07	18176872	2.08016					AX-147236042	A10	67377100	0.525656
AX-176800900	A07	18176883	2.08019					AX-176795549	A10	95250338	6.86801	****
AX-176800881	A07	18176920	2.31363					AX-176813315	A10	98891152	0.293731					AX-177643426	B08	5678750	9.75013	****
AX-176799773	A07	18176943	1.9936					AX-147236856	A10	104674897	0.294076					AX-176819410	B08	15974491	9.40025	****
AX-176801743	A07	18176946	1.99357													AX-176809193	B08	15979205	3.54561	***
AX-176800791	A07	18177083	1.99357					AX-147237421	B01	324682	8.73993	****				AX-147257868	B08	19625060	1.34122
AX-176798667	A07	18177119	1.99298					AX-147237432	B01	525042	9.65052	****				AX-176801089	B08	28002434	8.74124	****
AX-176797254	A07	18177448	1.99302					AX-147237458	B01	769119	10.7533	****				AX-177641506	B08	31741859	8.3416	****
AX-176802515	A07	18177486	1.99302					AX-147237465	B01	896297	10.7856	****				AX-176808178	B08	36833226	5.32281	****
AX-177638153	A07	18177497	2.02157					AX-147209810	B01	1128855	11.1748	****				AX-176796159	B08	36833230	5.32007	****
AX-176807804	A07	18177556	2.00957					AX-147237495	B01	1220452	11.1915	****				AX-176815070	B08	36839576	9.35087	****
AX-176796200	A07	18177607	1.99364					AX-147209678	B01	1431059	10.5353	****				AX-177644132	B08	109905939	10.0139	****
AX-176813375	A07	18177810	1.99384					AX-147237529	B01	1453243	10.5539	****				AX-147259163	B08	121556595	2.64287
AX-176798213	A07	18177857	1.65114					AX-147237587	B01	2102983	6.54217	****				AX-147259182	B08	122223999	2.6426
AX-176792710	A07	18178284	2.02202					AX-147208994	B01	3439024	2.81517					AX-147259195	B08	122363848	2.12401
AX-177638186	A07	18178505	2.03676					AX-147208955	B01	3624699	2.81522					AX-147259220	B08	122831418	2.1235
AX-176798930	A07	18178701	2.03675					AX-147237696	B01	3963695	2.8089					AX-147259221	B08	122897408	2.1235
AX-176799137	A07	18178777	1.88125					AX-176791972	B01	3991793	2.81517					AX-147259300	B08	124336392	2.12337
AX-176809341	A07	18178904	1.88125					AX-176791872	B01	5672434	2.66217					AX-147259351	B08	125473859	2.07607
AX-176802256	A07	18178939	1.68619					AX-147237828	B01	6337719	3.18738					AX-176792136	B08	125956737	2.12342
AX-176801381	A07	18178972	1.68618					AX-147237868	B01	7216931	3.26735					AX-147259480	B08	128158193	0.64638
AX-176801587	A07	18179068	1.68618					AX-147237874	B01	7369157	3.24408					AX-147259486	B08	128211868	0.623834
AX-176794665	A07	18179069	1.68618					AX-176791994	B01	9391666	3.07663					AX-147259496	B08	128323260	0.624734
AX-176798775	A07	18179075	1.6362					AX-176810775	B01	11960963	3.80011					AX-176792038	B08	128637022	0.669439
AX-176814859	A07	18179077	1.6362					AX-147207903	B01	13030024	6.71418	****				AX-147259523	B08	128894510	0.624928
AX-176806596	A07	18179140	1.51494					AX-176805872	B01	15994407	6.14031	****
AX-176801193	A07	18179160	1.51493					AX-147207638	B01	16825660	5.48725	****
AX-176799558	A07	18179163	1.51493					AX-176819138	B01	17264472	6.51531	****				AX-147259681	B09	1404687	7.17458	****
AX-176812902	A07	18179461	1.51058					AX-176797559	B01	22199621	5.04067	****				AX-147259684	B09	1418475	7.63143	****
AX-176823773	A07	18179526	1.51058					AX-147238252	B01	24245922	6.07433	****				AX-147259699	B09	1605429	7.63151	****
AX-176811945	A07	18180024	1.5062					AX-147224970	B01	27441886	9.75056	****				AX-147259703	B09	1619980	7.63151	****
AX-176812952	A07	18180236	1.84971					AX-176809240	B01	32580976	5.32865	****				AX-147259787	B09	2624818	7.63153	****
AX-177638835	A07	18180239	1.84973					AX-176791759	B01	33166457	5.90688	****				AX-147259791	B09	2719395	7.63151	****
AX-177638848	A07	18180316	1.77277					AX-176823511	B01	33888690	5.76964	****				AX-176791782	B09	2862787	7.63151	****
AX-176793162	A07	18180358	1.77012					AX-176819865	B01	36538462	5.64482	****				AX-147259838	B09	3508840	7.63155	****
AX-176817339	A07	18180594	1.77012					AX-176813854	B01	41386088	5.46265	****				AX-176791539	B09	3807796	7.65957	****
AX-176805557	A07	18180877	1.77113					AX-176808043	B01	47005832	0.796686					AX-147259886	B09	3956919	7.59726	****
AX-177641377	A07	23406393	1.41438					AX-176795601	B01	52956625	4.76766	****				AX-147259963	B09	5083710	7.59723	****
AX-147228073	A07	23988146	2.82549					AX-176815179	B01	65696288	11.9399	****				AX-147260194	B09	10135479	7.56328	****
AX-176802411	A07	24823307	12.3611	****				AX-147214594	B01	69167034	10.6231	****				AX-147260211	B09	10376197	7.56358	****
AX-176801245	A07	26175719	2.26215					AX-176808868	B01	113755738	11.0227	****				AX-147260230	B09	10719853	7.56548	****
AX-177639461	A07	26203823	1.94186					AX-147238796	B01	114749669	5.04815	****				AX-147260234	B09	10801176	12.4712	****
AX-176800926	A07	26204759	1.95101					AX-147238820	B01	116043545	2.96147					AX-176791960	B09	12385370	0.209909
AX-177638571	A07	26329688	1.94703					AX-176791457	B01	116719216	2.97278
AX-147228146	A07	28320911	2.03445					AX-176802580	B01	117112930	3.34494					AX-176791703	B10	9968629	4.25967	****
AX-176817852	A07	28340516	2.15781					AX-147238924	B01	121642962	2.97551					AX-147263446	B10	10717070	4.25967	****
AX-176815251	A07	29037518	2.29268					AX-147238948	B01	122737994	5.0511	****				AX-147263491	B10	11214359	4.25967	****
AX-177642025	A07	34314337	2.55679					AX-147239005	B01	124135621	6.49017	****				AX-177639192	B10	11960833	4.10483	***
AX-147228199	A07	34519088	2.07352					AX-176792079	B01	125661644	6.1753	****				AX-177644269	B10	13247245	4.25967	****
AX-147228270	A07	38770197	1.95279					AX-147239087	B01	126121763	6.18156	****				AX-176791776	B10	14052510	4.2599	****
AX-176807964	A07	40722763	2.06804					AX-147239097	B01	126275267	6.15741	****				AX-177642573	B10	14149454	4.37697	****
AX-176797490	A07	40785641	1.59156					AX-147239126	B01	127008022	5.88889	****				AX-147263607	B10	15189329	4.24942	****
AX-147228382	A07	49949867	2.3848					AX-147239132	B01	127063836	6.36161	****				AX-176820657	B10	17061918	3.10114
AX-177643396	A07	53903274	2.06555					AX-147239229	B01	129329429	6.0382	****				AX-177639228	B10	19663894	3.24225
AX-177640670	A07	53985964	2.16296					AX-147239236	B01	129357167	6.03821	****				AX-147263769	B10	22491904	3.50279	***
AX-147258677	A07	53986127	2.17188					AX-176791354	B01	129513514	7.18651	****				AX-176799200	B10	23494035	3.04305
AX-147228550	A07	60064185	1.94602					AX-147239269	B01	129771687	6.0568	****				AX-176792092	B10	25381175	3.41989	***
AX-147228566	A07	61354243	1.95327					AX-147239280	B01	129882691	6.0568	****				AX-147263844	B10	27366049	3.50386	***
AX-147228576	A07	62398239	1.95326					AX-147239347	B01	131386591	9.15023	****				AX-147264063	B10	60634383	0.233182
AX-147228581	A07	63185572	1.95365					AX-147239423	B01	133926550	5.29338	****				AX-147264064	B10	60634925	0.233182
AX-147228586	A07	63674899	1.96933					AX-147239547	B01	135112455	7.86218	****				AX-176810036	B10	96793488	4.22222	****
AX-147228590	A07	64213755	2.13644					AX-176791498	B01	135222846	6.15632	****				AX-147264208	B10	101217593	4.2142	****
AX-176820084	A07	64335562	2.08585					AX-147239650	B01	136439457	2.78849					AX-177637244	B10	102847093	3.66994	***
AX-147228634	A07	65957786	2.0193					AX-147239660	B01	136506177	2.78434					AX-177638757	B10	106292220	2.89047
AX-147228658	A07	67162381	2.01922					AX-147239736	B01	137130556	4.57121	***				AX-147264328	B10	111150033	3.86005	***
AX-147228738	A07	69596041	1.83136													AX-147264395	B10	113584807	3.55789	***
AX-147228759	A07	70123570	2.08642					AX-176801528	B03	22308023	12.0018	****				AX-147264426	B10	115833661	3.87355	***
AX-147228785	A07	71124776	0.0365166					AX-176796172	B03	22308147	9.8923	****				AX-177639479	B10	116395569	3.64329	***
AX-147228791	A07	71387264	0.0182181					AX-176805906	B03	22308199	9.82826	****				AX-147264511	B10	118693317	3.87693	***
AX-147256944	A07	71736391	0.0606676					AX-176809312	B03	22308225	9.82826	****				AX-176791558	B10	119275183	2.10579
AX-147228852	A07	72094208	0.128409					AX-176801202	B03	22308280	9.37482	****				AX-176791820	B10	123961122	9.50906	****
AX-177643823	A07	72679285	0.0915754					AX-176816852	B03	26652687	1.10413					AX-147264750	B10	125927111	9.50877	****
AX-147228982	A07	74519999	0.215453					AX-176807784	B03	27434627	0.0950511					AX-177639345	B10	126150964	9.50877	****
AX-176821410	A07	75852917	0.0632624					AX-176807624	B03	34698486	1.66019					AX-147264825	B10	128125458	9.50959	****
AX-147229051	A07	76344679	0.0522893					AX-176811706	B03	35762650	1.98897					AX-176791475	B10	129422452	17.8923	****
AX-177643546	A07	77607168	0.274118					AX-147244439	B03	36081439	1.78521					AX-147264913	B10	130237287	9.50914	****
								AX-147244469	B03	37156167	0.422704					AX-147264945	B10	130799987	9.50881	****
AX-177641745	A08	8857956	2.07616					AX-176815015	B03	38150429	0.380824					AX-147265042	B10	131806031	9.24952	****
AX-177642006	A08	29642173	0.504178					AX-176795550	B03	38150434	0.380824					AX-176791882	B10	131908361	9.24956	****
AX-176817973	A08	43472087	3.77968	***				AX-176816891	B03	38150784	0.380827					AX-177642086	B10	133289435	12.2693	****
								AX-147244572	B03	45132180	1.67616					AX-176791643	B10	133449357	10.8434	****
AX-147260196	A09	8267184	5.16819	****				AX-176814342	B03	106248333	0.507362					AX-147265254	B10	133759254	9.24969	****
AX-147232661	A09	8661916	5.30382	****				AX-147245171	B03	117848795	1.79896					AX-147265272	B10	133880109	9.24948	****
AX-147260629	A09	14150363	6.95288	****				AX-147245258	B03	120052892	1.0984					AX-177643056	B10	133954862	9.24948	****
								AX-147245263	B03	120120121	1.80164					AX-147265291	B10	133973530	9.24948	****
AX-176820766	A10	7984682	3.74846	***				AX-176792179	B03	120236635	1.80167					AX-147265307	B10	134076186	9.24948	****
AX-176803305	A10	12933326	2.71927					AX-147245309	B03	121027376	1.80168					AX-147265486	B10	135303526	9.24948	****
AX-176796506	A10	18066033	5.8262	****				AX-147245336	B03	121303111	1.80167					AX-147265500	B10	135518938	9.24948	****
AX-176820028	A10	21109953	1.43646					AX-147245392	B03	122191218	0.806742					AX-147265510	B10	135552827	9.24948	****
AX-147241244	A10	57142266	10.6574	****				AX-147245394	B03	122239376	0.934851					AX-177639120	B10	135713446	9.24947	****
AX-176795549	A10	95250338	6.07655	****				AX-147245419	B03	122885412	0.527788					AX-147237311	B10	135771077	9.17203	****
								AX-176813056	B03	123605071	0.348409					AX-147265545	B10	135808237	9.23884	****
AX-147237432	B01	525042	5.73107	****				AX-147245500	B03	124672923	0.353598
AX-147237458	B01	769119	6.05026	****				AX-147245502	B03	124680620	0.847746
AX-147237465	B01	896297	6.05026	****				AX-147245544	B03	125148566	0.839872
AX-147209810	B01	1128855	5.79001	****				AX-147245545	B03	125151253	0.366871
AX-147237495	B01	1220452	6.17892	****				AX-176791887	B03	126294568	0.360291
AX-147209678	B01	1431059	6.48197	****				AX-147245793	B03	1.28561e+08	1.43765
AX-147237529	B01	1453243	6.01722	****				AX-147245802	B03	1.28603e+08	1.4395
AX-147237587	B01	2102983	4.15897	***				AX-176791753	B03	128907556	0.33234
AX-147208994	B01	3439024	0.467531					AX-147218217	B03	1.29421e+08	0.411339
AX-147208955	B01	3624699	0.427966					AX-176791517	B03	129787316	0.403558
AX-147237696	B01	3963695	0.40664					AX-147245896	B03	1.29792e+08	0.406904
AX-176791972	B01	3991793	0.410349					AX-147245901	B03	1.29828e+08	0.384973
AX-176791872	B01	5672434	2.03389					AX-147245940	B03	130286855	0.669517
AX-147237828	B01	6337719	0.372706					AX-147245966	B03	1.30622e+08	0.970317
AX-147237868	B01	7216931	0.335051					AX-147218333	B03	130873990	0.908626
AX-147237874	B01	7369157	0.270063					AX-147246077	B03	1.32012e+08	1.21258
AX-176791994	B01	9391666	0.340568					AX-147246079	B03	1.32032e+08	1.21258
AX-147207903	B01	13030024	0.418779					AX-147246130	B03	132749247	1.29512
AX-147238071	B01	13582092	2.57719					AX-176804329	B03	132938538	0.342563
AX-176805872	B01	15994407	3.24325					AX-147246147	B03	1.3302e+08	0.250562
AX-147207638	B01	16825660	1.69572					AX-147218491	B03	133159344	1.46279
AX-176819138	B01	17264472	1.18849					AX-147246163	B03	1.33161e+08	1.4624
AX-176797559	B01	22199621	0.845668					AX-176802986	B03	133487997	0.503589
AX-147238252	B01	24245922	1.04255					AX-147246176	B03	133622000	0.426059
AX-147224970	B01	27441886	1.95915					AX-176791415	B03	1.34089e+08	0.606326
AX-176809240	B01	32580976	1.21068					AX-147246215	B03	134096690	1.30567
AX-176791759	B01	33166457	1.10109					AX-176791476	B03	135810780	5.59726	****
AX-176823511	B01	33888690	0.844219					AX-147246324	B03	135984987	5.5913	****
AX-176819865	B01	36538462	1.29361
AX-176813854	B01	41386088	0.987835					AX-147221280	B04	130961045	3.70162
AX-176795601	B01	52956625	1.75838					AX-176799045	B04	130996008	3.63998
AX-176815179	B01	65696288	1.25161					AX-147248816	B04	131009789	5.33697	****
AX-147214594	B01	69167034	1.04476					AX-147221308	B04	131087339	3.22773
AX-176808868	B01	113755738	1.88574					AX-147221309	B04	131087434	3.2277
AX-147238796	B01	114749669	2.26954					AX-147221312	B04	131143480	3.23658
AX-147238820	B01	116043545	4.14039	***				AX-176798868	B04	131185893	4.93582	****
AX-176791457	B01	116719216	4.11269	***				AX-176795109	B04	131219792	4.93773	****
AX-176802580	B01	117112930	4.09291	***				AX-147248834	B04	131282663	5.48941	****
AX-147238924	B01	121642962	4.37466	****				AX-147221332	B04	131365278	5.5003	****
AX-147238948	B01	122737994	1.36632					AX-147221333	B04	131365849	5.5003	****
AX-147239005	B01	124135621	0.165344					AX-147221335	B04	131366514	5.50039	****
AX-176792079	B01	125661644	0.260748					AX-176791380	B04	131369085	5.50035	****
AX-147239087	B01	126121763	0.404493					AX-147221336	B04	131369776	4.8565	****
AX-147239097	B01	126275267	0.298805					AX-147221339	B04	131385626	4.8554	****
AX-147239126	B01	127008022	0.366317					AX-176814770	B04	131403164	5.50046	****
AX-147239132	B01	127063836	0.366692					AX-176822492	B04	131403739	5.51486	****
AX-147239229	B01	129329429	0.321404					AX-147221351	B04	131404006	3.68584
AX-147239236	B01	129357167	0.299211					AX-147248849	B04	131447872	4.55852	***
AX-176791354	B01	129513514	0.217647					AX-147248854	B04	131462529	5.61377	****
AX-147239269	B01	129771687	0.135975					AX-147248863	B04	131625171	4.26356	***
AX-147239280	B01	129882691	0.195218					AX-147248864	B04	131628381	4.23762	***
AX-147239347	B01	131386591	0.397323					AX-147248894	B04	132671610	4.31901	***
AX-147239400	B01	132569217	0.0481682					AX-147248906	B04	133215432	4.8315	****
AX-147239423	B01	133926550	0.134927					AX-147248909	B04	133317694	5.38924	****
AX-147239547	B01	135112455	0.169506
AX-176791498	B01	135222846	0.0317392					AX-176808166	B05	18651029	9.76335	****
AX-147239650	B01	136439457	1.49512					AX-147222145	B05	20375298	5.68341	****
AX-147239660	B01	136506177	1.46314					AX-176804524	B05	25508442	0.382392
AX-147239736	B01	137130556	0.356641					AX-176815769	B05	40374124	0.402927
								AX-176809590	B05	64545278	0.428155
AX-147239792	B02	262035	0.393687					AX-176821867	B05	93830809	0.579744
AX-147239806	B02	378957	0.298149					AX-176812700	B05	95397826	0.55351
AX-147239826	B02	463495	0.445947					AX-147250202	B05	117310886	0.513729
AX-147212492	B02	778642	0.445962					AX-147250224	B05	118856272	0.512097
AX-147239986	B02	1296859	0.37466					AX-176815565	B05	120888173	8.14674	****
AX-176819098	B02	1316076	0.374468					AX-147250318	B05	122956001	0.535268
AX-147240075	B02	1620220	2.1378					AX-147250343	B05	123992671	0.583145
AX-147240114	B02	1783128	2.10779					AX-176800777	B05	125699812	0.759013
AX-147240166	B02	1979905	2.22758					AX-147250415	B05	126784749	0.542892
AX-147240256	B02	2197152	2.22018					AX-147250428	B05	127127435	0.572897
AX-147240277	B02	2291623	2.16811					AX-147250483	B05	130306816	0.572985
AX-176792068	B02	2365066	1.48901					AX-147250542	B05	132615089	0.812169
AX-147240299	B02	2423971	1.49449					AX-147250555	B05	133272503	0.86973
AX-147240304	B02	2467872	1.8743					AX-147250568	B05	133901493	0.818593
AX-147212805	B02	2510172	1.87055					AX-147250693	B05	137526639	0.869734
AX-147240437	B02	4591623	0.427188					AX-176791873	B05	137560499	0.869735
AX-147240444	B02	4649921	0.427185					AX-147250728	B05	138251806	0.873673
AX-147240690	B02	7756210	1.05456					AX-176821307	B05	141474535	0.863775
AX-176791647	B02	7863983	1.04318					AX-176799661	B05	142429794	0.218432
AX-147240758	B02	9327175	1.70694					AX-147223816	B05	146590930	0.44118
AX-147240783	B02	10083831	1.40429					AX-147251343	B05	148444844	2.76663
AX-147240868	B02	12432351	1.27358					AX-147251390	B05	148892105	4.00886	***
AX-176816559	B02	13566985	1.52732					AX-147223970	B05	149108891	0.336938
AX-147240981	B02	16302789	1.10728					AX-147223971	B05	149112025	0.165843
AX-147240987	B02	16781198	1.06948
AX-176814069	B02	25034123	2.44501					AX-147251517	B06	252362	2.12742
AX-176810584	B02	73563415	5.51704	****				AX-147251572	B06	906068	1.68947
AX-147241656	B02	82436771	6.43428	****				AX-176815509	B06	1909409	1.63078
AX-176793794	B02	82582784	6.53682	****				AX-176821623	B06	2198106	2.4639
AX-147241677	B02	83660131	6.43371	****				AX-147251793	B06	3620645	13.0112	****
AX-147241682	B02	83956837	6.43371	****				AX-147251810	B06	3917236	11.3485	****
AX-147241702	B02	84802896	6.43403	****				AX-176794335	B06	7000834	16.6349	****
AX-176816700	B02	85124123	10.8146	****				AX-147252038	B06	7484274	13.5278	****
AX-147241709	B02	85213180	6.58033	****				AX-147252098	B06	9318095	14.1006	****
AX-176816711	B02	88992967	5.95294	****				AX-147252228	B06	12281786	13.3407	****
AX-176800139	B02	90402608	0.982074					AX-147252267	B06	13163062	9.50167	****
AX-147241916	B02	91975066	5.64784	****				AX-147252287	B06	13633699	9.32383	****
AX-147242039	B02	94026024	5.97124	****				AX-177640081	B06	13651322	12.0777	****
AX-176791941	B02	94802544	5.97137	****				AX-147252289	B06	13664789	11.871	****
AX-147242097	B02	94962649	5.97138	****				AX-147252306	B06	13957090	9.73272	****
AX-147242338	B02	100393173	8.79991	****				AX-147252314	B06	14176970	10.2645	****
AX-147242383	B02	100940577	5.8865	****				AX-147252329	B06	14374420	9.78687	****
AX-147242413	B02	101400907	4.77374	****				AX-147252421	B06	16759789	11.8285	****
AX-147242414	B02	101401524	4.77374	****				AX-176795310	B06	22767474	11.6135	****
AX-147242580	B02	103980876	1.85015					AX-176791924	B06	24364654	10.261	****
AX-176791392	B02	104833813	0.216301					AX-147252686	B06	27994454	9.38589	****
AX-147242664	B02	104842996	0.0924439					AX-147252687	B06	27995343	9.30616	****
AX-147242688	B02	105150391	0.0921992					AX-147252778	B06	35075298	8.80116	****
AX-147242696	B02	105197496	0.0944358					AX-147225299	B06	35557239	9.31686	****
AX-147242719	B02	105459475	0.137926					AX-176815586	B06	37850641	11.8922	****
AX-147242749	B02	105777210	0.0435193					AX-176810808	B06	83007288	8.66782	****
AX-147242782	B02	106199533	0.0272911					AX-147252948	B06	87043539	9.91174	****
AX-147242790	B02	106275015	0.0272908					AX-147252973	B06	89581718	9.87976	****
AX-147242801	B02	106519289	0.0521045					AX-176808576	B06	90816220	3.92583	***
AX-147242807	B02	106733410	0.0406323					AX-176817639	B06	96567520	12.5676	****
AX-147242840	B02	108129417	0.0742557					AX-176815067	B06	96597652	15.0951	****
AX-147215246	B02	108210066	0.104043					AX-176791352	B06	103027033	9.9023	****
								AX-147253266	B06	115228228	9.42958	****
AX-147242994	B03	1844786	2.24732					AX-147253268	B06	115530806	10.5709	****
AX-147243021	B03	2002905	2.0065					AX-147253390	B06	120283916	12.7524	****
AX-147243043	B03	2173533	2.19829					AX-147253538	B06	124381466	12.791	****
AX-147214870	B03	16566657	7.90428	****				AX-147253545	B06	124476859	12.8933	****
AX-176801528	B03	22308023	3.21632					AX-147253575	B06	124770106	10.086	****
AX-176796172	B03	22308147	3.21632					AX-147253713	B06	127612777	12.696	****
AX-176805906	B03	22308199	3.21631					AX-147253740	B06	128289653	12.3243	****
AX-176816852	B03	26652687	2.18877					AX-176817773	B06	128336903	14.1881	****
AX-176807784	B03	27434627	0.658945					AX-147253745	B06	1.28353e+08	14.1501	****
AX-176814342	B03	106248333	0.13626					AX-147253779	B06	128992668	16.7435	****
AX-147245171	B03	117848795	0.412451					AX-176820915	B06	129575475	13.7569	****
AX-147245258	B03	120052892	0.332832					AX-147253886	B06	130343046	11.8872	****
AX-147245263	B03	120120121	0.401964					AX-147254039	B06	133321816	9.88612	****
AX-176792179	B03	120236635	0.355262					AX-147254041	B06	133323553	16.5224	****
AX-147245309	B03	121027376	0.373733					AX-147254102	B06	133735471	22.7807	****
AX-147245336	B03	121303111	0.380434					AX-147226599	B06	134109194	16.7355	****
AX-147245392	B03	122191218	0.229141					AX-147254191	B06	135004325	15.8119	****
AX-147245394	B03	122239376	0.237589					AX-147254198	B06	135080269	15.2824	****
AX-147245419	B03	122885412	0.289133					AX-147226735	B06	135770071	16.3442	****
AX-176813056	B03	123605071	0.316237					AX-176791829	B06	135783222	16.4598	****
AX-147218333	B03	130873990	0.658779					AX-147226748	B06	135786569	16.3924	****
AX-147246176	B03	133622000	1.01983					AX-147226754	B06	135787388	16.6617	****
AX-176791476	B03	135810780	1.08212					AX-147226756	B06	135787551	16.6617	****
AX-147246324	B03	135984987	0.887159					AX-176815617	B06	135807278	20.0438	****
AX-147221280	B04	130961045	1.11796					AX-176791822	B07	2671333	1.06454
AX-176799045	B04	130996008	0.764686					AX-147227165	B07	3073847	1.14547
AX-147248816	B04	131009789	0.770181					AX-147254570	B07	3080948	1.14394
AX-147221308	B04	131087339	0.933395					AX-147254586	B07	3309551	0.585876
AX-147221309	B04	131087434	0.890743					AX-147254636	B07	3941261	0.388121
AX-147221312	B04	131143480	1.24765					AX-147254688	B07	4382301	0.521573
AX-176798868	B04	131185893	0.368263					AX-147254706	B07	4673512	0.462236
AX-176795109	B04	131219792	0.929638					AX-147254725	B07	5155467	0.46336
AX-147248834	B04	131282663	1.2262					AX-147254792	B07	5966992	0.463615
AX-147221332	B04	131365278	0.953653					AX-147254826	B07	6386807	0.463616
AX-147221333	B04	131365849	1.16223					AX-147254849	B07	6688891	0.477251
AX-147221335	B04	131366514	1.07183					AX-147254864	B07	7278391	0.467739
AX-176791380	B04	131369085	1.01767					AX-147254891	B07	8538334	0.386432
AX-147221336	B04	131369776	1.07192					AX-147255209	B07	18647940	0.681385
AX-147221339	B04	131385626	0.953674					AX-176823337	B07	19639295	0.680553
AX-176814770	B04	131403164	1.15934					AX-177640563	B07	22555654	10.4972	****
AX-176822492	B04	131403739	0.774284					AX-176815482	B07	25617087	0.756897
AX-147221351	B04	131404006	0.224988					AX-147255407	B07	27113953	0.516741
AX-147248849	B04	131447872	0.27935					AX-147255421	B07	27860283	0.516777
AX-147248854	B04	131462529	1.19836					AX-177637996	B07	28573469	5.55098	****
AX-147248863	B04	131625171	1.03986					AX-176791431	B07	31648456	1.14801
AX-147248864	B04	131628381	1.10396					AX-147255541	B07	33022904	0.483433
AX-147248894	B04	132671610	1.02932					AX-147255574	B07	35115883	0.407467
AX-147248906	B04	133215432	0.749504					AX-176791990	B07	36741839	0.484174
AX-147248909	B04	133317694	0.465971					AX-177638941	B07	39001094	0.517814
								AX-147255657	B07	40161223	0.181851
AX-176808166	B05	18651029	4.3878	****				AX-177638127	B07	98978807	0.166567
AX-176815769	B05	40374124	0.370239					AX-177641518	B07	104036917	0.167019
AX-147222478	B05	43415063	0.0851419					AX-147256076	B07	105566627	0.187233
AX-176809590	B05	64545278	0.75435					AX-176821297	B07	105872336	0.329427
AX-147222592	B05	73835105	0.843689					AX-147256109	B07	106774615	0.185327
AX-176821867	B05	93830809	0.496257					AX-176793978	B07	106851423	0.185938
AX-176812700	B05	95397826	0.672502					AX-176804480	B07	106851536	0.185794
AX-147250202	B05	117310886	0.735905					AX-176814221	B07	106851564	0.185672
AX-147250224	B05	118856272	0.73592					AX-176806568	B07	113297618	0.336609
AX-147250318	B05	122956001	0.73592					AX-147256330	B07	114323477	0.196519
AX-147250343	B05	123992671	0.735919					AX-147256340	B07	114490353	0.195805
AX-176800777	B05	125699812	0.735919					AX-147256405	B07	116350309	1.21
AX-147250415	B05	126784749	0.735919					AX-147256413	B07	116532475	0.811399
AX-147250428	B05	127127435	0.735919					AX-147256449	B07	117675646	1.27825
AX-147250483	B05	130306816	0.635894					AX-177640874	B07	118405970	1.67239
AX-147250542	B05	132615089	0.735918					AX-176817880	B07	120684461	0.0541035
AX-147250555	B05	133272503	0.735919					AX-147256773	B07	124014849	1.25584
AX-147250568	B05	133901493	0.731427					AX-147256778	B07	124151442	1.1467
AX-147250693	B05	137526639	0.929504					AX-147256817	B07	124642564	1.16395
AX-176791873	B05	137560499	0.929508					AX-176791477	B07	124806514	1.08079
AX-147250728	B05	138251806	0.929507					AX-147256831	B07	124808289	1.08059
AX-176821307	B05	141474535	1.06758					AX-147256871	B07	125572052	0.994174
AX-147251343	B05	148444844	0.866037					AX-147256877	B07	125624042	0.994176
AX-147251390	B05	148892105	0.741055					AX-147256898	B07	125925487	0.501358
AX-147223970	B05	149108891	0.997829
AX-147223971	B05	149112025	1.17458					AX-147257262	B08	3465897	3.02527
AX-147251425	B05	149286498	1.19639					AX-176791821	B08	3524052	5.01987	****
AX-147224039	B05	149672764	0.0507631					AX-147257270	B08	3608931	5.01098	****
								AX-176791743	B08	4769423	3.98965	***
AX-147251517	B06	252362	1.87664					AX-177643426	B08	5678750	7.56847	****
AX-147251572	B06	906068	2.96305					AX-147257458	B08	6300409	3.00573
AX-176815509	B06	1909409	3.42077					AX-147257470	B08	6406730	5.00832	****
AX-176821623	B06	2198106	3.13665					AX-147257484	B08	6642505	5.01075	****
AX-147251793	B06	3620645	0.74496					AX-177642834	B08	7259589	5.01079	****
AX-147251810	B06	3917236	0.60994					AX-147257516	B08	7439204	5.0108	****
AX-147252038	B06	7484274	0.796374					AX-176823225	B08	7798891	3.17816
AX-147252098	B06	9318095	10.3249	****				AX-147257729	B08	13636051	6.70081	****
AX-147252228	B06	12281786	10.6047	****				AX-176806766	B08	15969665	7.94496	****
AX-147252267	B06	13163062	10.4149	****				AX-176819410	B08	15974491	4.43691	***
AX-147252287	B06	13633699	10.5735	****				AX-176809193	B08	15979205	4.4285	***
AX-177640081	B06	13651322	10.6615	****				AX-176807298	B08	16126958	4.41778	***
AX-147252306	B06	13957090	10.6922	****				AX-147257828	B08	17906817	4.41682	***
AX-147252314	B06	14176970	10.7203	****				AX-147257868	B08	19625060	5.26302	****
AX-147252329	B06	14374420	10.6622	****				AX-147257934	B08	21828533	4.60084	***
AX-147252421	B06	16759789	10.7017	****				AX-147257993	B08	23833277	4.05625	***
AX-176795310	B06	22767474	11.716	****				AX-177640112	B08	25534918	3.72018
AX-176791924	B06	24364654	10.7157	****				AX-147258047	B08	26013615	3.64033
AX-147252686	B06	27994454	11.2188	****				AX-176801089	B08	28002434	6.99975	****
AX-147252687	B06	27995343	11.3854	****				AX-177641883	B08	28490879	4.32521	***
AX-147252778	B06	35075298	6.40319	****				AX-176804099	B08	28852312	4.26347	***
AX-147225299	B06	35557239	2.76824					AX-176793999	B08	29255254	4.45453	***
AX-176810808	B06	83007288	10.7345	****				AX-176805513	B08	29255307	4.45453	***
AX-147252948	B06	87043539	9.00167	****				AX-176808255	B08	29255497	4.45305	***
AX-147252973	B06	89581718	11.6786	****				AX-176815701	B08	29255521	4.45305	***
AX-176808576	B06	90816220	4.1766	***				AX-176814820	B08	30041320	7.45424	****
AX-176817639	B06	96567520	10.294	****				AX-177641506	B08	31741859	1.61154
AX-176815067	B06	96597652	10.3877	****				AX-147228957	B08	33072693	4.59911	***
AX-176791352	B06	103027033	12.6714	****				AX-176805053	B08	36820073	7.21585	****
AX-147253266	B06	115228228	11.7724	****				AX-147225568	B08	36820742	5.79067	****
AX-147253268	B06	115530806	11.9539	****				AX-147225570	B08	36820910	5.79064	****
AX-147253390	B06	120283916	9.83646	****				AX-176812838	B08	36821218	4.3902	***
AX-147253538	B06	124381466	10.469	****				AX-176807585	B08	36823688	4.39114	***
AX-147253545	B06	124476859	10.617	****				AX-176802601	B08	36826493	4.41371	***
AX-147253575	B06	124770106	6.87496	****				AX-176793825	B08	36828604	4.41327	***
AX-147253713	B06	127612777	8.997	****				AX-176808178	B08	36833226	4.42954	***
AX-147253740	B06	128289653	8.86907	****				AX-176796159	B08	36833230	4.42954	***
AX-147253779	B06	128992668	8.82313	****				AX-176792723	B08	36833243	4.42954	***
AX-176820915	B06	129575475	9.52966	****				AX-147225598	B08	36838798	4.21287	***
AX-147253886	B06	130343046	7.73771	****				AX-176803800	B08	36839131	4.21672	***
AX-147254039	B06	133321816	8.33227	****				AX-176815070	B08	36839576	4.1871	***
AX-147254041	B06	133323553	8.32715	****				AX-147258408	B08	73340378	4.21016	***
AX-147254102	B06	133735471	8.5358	****				AX-147258422	B08	77662040	4.21178	***
AX-147226599	B06	134109194	7.59627	****				AX-147258593	B08	101670375	4.25632	***
AX-147254191	B06	135004325	8.8946	****				AX-147258622	B08	102977322	6.71714	****
AX-147254198	B06	135080269	9.34391	****				AX-147258634	B08	103537009	4.29296	***
AX-147226735	B06	135770071	9.51271	****				AX-177641013	B08	103633476	5.05992	****
AX-176791829	B06	135783222	9.49885	****				AX-147231175	B08	108072552	4.34186	***
AX-147226748	B06	135786569	9.48955	****				AX-176819642	B08	108072552	4.34186	***
AX-147226754	B06	135787388	9.48957	****				AX-177644132	B08	109905939	9.95906	****
AX-147226756	B06	135787551	9.48957	****				AX-177643803	B08	110550614	6.95148	****
AX-176815617	B06	135807278	9.48096	****				AX-147231262	B08	112925307	5.46804	****
								AX-147258867	B08	113226569	7.346	****
AX-147254304	B07	270626	0.523101					AX-147258872	B08	113312961	4.53563	***
AX-147254311	B07	391523	0.524572					AX-147258881	B08	113601371	6.74446	****
AX-147254346	B07	831840	0.515175					AX-147258883	B08	113633453	4.73194	****
AX-176791987	B07	919868	0.508573					AX-147259027	B08	118293002	3.47611
AX-147254361	B07	1015560	0.491346					AX-147259053	B08	119368164	1.86532
AX-147254365	B07	1037512	0.490759					AX-147259163	B08	121556595	2.42497
AX-176792151	B07	1121226	0.487342					AX-147259182	B08	122223999	2.42499
AX-177641448	B07	1369152	0.44035					AX-147259195	B08	122363848	2.7652
AX-176791822	B07	2671333	0.501783					AX-147259220	B08	122831418	2.77928
AX-147227165	B07	3073847	0.508071					AX-147259221	B08	122897408	2.76528
AX-147254570	B07	3080948	0.508071					AX-147259300	B08	124336392	1.88471
AX-147254586	B07	3309551	0.846555					AX-147259351	B08	125473859	1.50174
AX-147254636	B07	3941261	3.37435					AX-176792136	B08	125956737	1.81805
AX-147254688	B07	4382301	3.16764					AX-147259480	B08	128158193	3.17124
AX-147254706	B07	4673512	3.44893					AX-147259486	B08	128211868	2.85583
AX-147254725	B07	5155467	3.58798					AX-147259496	B08	128323260	4.19799	***
AX-147254792	B07	5966992	3.75266	***				AX-176792038	B08	128637022	1.7364
AX-147254826	B07	6386807	3.79918	***				AX-147259523	B08	128894510	1.7044
AX-147254849	B07	6688891	3.83965	***
AX-147254864	B07	7278391	3.83913	***				AX-147259657	B09	1032577	3.32169
AX-147254891	B07	8538334	3.78898	***				AX-147259681	B09	1404687	0.391601
AX-147255209	B07	18647940	4.21472	***				AX-147259684	B09	1418475	0.395488
AX-176823337	B07	19639295	4.44791	****				AX-147259699	B09	1605429	0.39583
AX-177640563	B07	22555654	4.43016	****				AX-147259703	B09	1619980	0.395061
AX-147255407	B07	27113953	3.72655	***				AX-147259787	B09	2624818	0.412288
AX-147255421	B07	27860283	3.72677	***				AX-147259791	B09	2719395	0.48023
AX-177637996	B07	28573469	2.46343					AX-176791782	B09	2862787	0.575978
AX-176791431	B07	31648456	4.11676	***				AX-147259838	B09	3508840	0.474665
AX-147255541	B07	33022904	3.8578	***				AX-176791539	B09	3807796	0.478979
AX-176791990	B07	36741839	3.80779	***				AX-147259886	B09	3956919	0.453927
AX-177638941	B07	39001094	3.80808	***				AX-147259963	B09	5083710	0.422604
AX-147255657	B07	40161223	5.11161	****				AX-147260194	B09	10135479	0.4004
AX-177638127	B07	98978807	5.28598	****				AX-147260211	B09	10376197	0.55239
AX-177641518	B07	104036917	4.80117	****				AX-147260230	B09	10719853	0.55228
AX-147256076	B07	105566627	5.76001	****				AX-147260234	B09	10801176	0.00883773
AX-147256109	B07	106774615	5.76327	****				AX-176791960	B09	12385370	0.747797
AX-176793978	B07	106851423	5.77361	****				AX-147260445	B09	13954905	4.32638	***
AX-176804480	B07	106851536	5.77361	****				AX-147260452	B09	13983443	6.54192	****
AX-147229545	B07	111244066	5.31719	****				AX-147260453	B09	13984051	6.62085	****
AX-176806568	B07	113297618	6.50802	****				AX-147260518	B09	15640616	4.13211	***
AX-147256330	B07	114323477	6.76012	****				AX-177643092	B09	19855804	5.98762	****
AX-147256340	B07	114490353	6.76012	****				AX-177643504	B09	20598327	8.46973	****
AX-147256405	B07	116350309	2.23922					AX-177640604	B09	22210750	4.9044	****
AX-147256413	B07	116532475	2.20436					AX-176792156	B09	24898740	6.83935	****
AX-147256449	B07	117675646	2.27545					AX-147260811	B09	26142110	4.52693	***
AX-177640874	B07	118405970	2.15384					AX-147260846	B09	27563919	4.52675	***
AX-147256496	B07	118840051	2.23462					AX-147260872	B09	29510686	5.29367	****
AX-176823719	B07	118843481	2.23462					AX-147260916	B09	32634012	4.83188	****
AX-147256506	B07	119146521	2.03045					AX-147260926	B09	33805614	4.50601	***
AX-147229878	B07	120267615	0.752552					AX-147260956	B09	36640447	7.12403	****
AX-147256570	B07	120558364	1.39063					AX-176804223	B09	41788230	4.56236	***
AX-176817880	B07	120684461	1.4197					AX-147261029	B09	42956353	4.4885	***
AX-176791974	B07	121786584	1.48472					AX-147261091	B09	50015557	8.40399	****
AX-147256628	B07	121936175	1.33155					AX-176811401	B09	50024895	8.40367	****
AX-147256658	B07	122415857	1.53934					AX-176812165	B09	50027352	8.3961	****
AX-147256681	B07	122864685	1.53934					AX-176796601	B09	50051330	7.77456	****
AX-147256698	B07	122997921	1.53934					AX-176801542	B09	50055719	7.77417	****
AX-147256704	B07	123068995	1.53934					AX-147233346	B09	50058047	7.66698	****
AX-147256721	B07	123241444	1.53935					AX-147261211	B09	79642894	6.83331	****
AX-147256773	B07	124014849	1.61282					AX-147261253	B09	89388921	4.54382	***
AX-147256778	B07	124151442	1.61282					AX-176810869	B09	97172470	4.79833	****
AX-147256817	B07	124642564	1.53572					AX-176796853	B09	97613023	4.78108	****
AX-176791477	B07	124806514	1.57519					AX-177640347	B09	112363497	4.27457	***
AX-147256831	B07	124808289	1.57519					AX-176801597	B09	114206705	3.73685
AX-147256871	B07	125572052	0.303987					AX-147261634	B09	125220602	7.58937	****
AX-147256877	B07	125624042	0.303983					AX-177638066	B09	126944854	8.34907	****
AX-147256898	B07	125925487	0.304063					AX-177637637	B09	126996989	8.1138	****
								AX-147261694	B09	128347424	5.06006	****
AX-147256922	B08	60902	0.450591					AX-177637290	B09	129848706	5.64051	****
AX-147256928	B08	298197	0.449461					AX-147261853	B09	135376574	4.64293	****
AX-177643680	B08	1067792	0.521221					AX-176808207	B09	137716024	11.2021	****
AX-147257032	B08	1194269	0.576048					AX-147261962	B09	137987524	7.41068	****
AX-177644636	B08	1345574	0.576065					AX-147261968	B09	138035545	5.22253	****
AX-176801554	B08	1895781	1.69626					AX-147262017	B09	138989973	3.20866
AX-147257139	B08	2233615	1.46374					AX-147234367	B09	143198232	0.288123
AX-147257178	B08	2454730	1.69623					AX-147262346	B09	143618134	0.43736
AX-147257243	B08	3136502	1.86833					AX-177638435	B09	146828839	0.247284
AX-147257262	B08	3465897	0.588566
AX-176791821	B08	3524052	0.588551					AX-147209362	B10	484822	0.793674
AX-147257270	B08	3608931	0.492409					AX-147262827	B10	757821	0.803451
AX-176791743	B08	4769423	0.406029					AX-147262885	B10	1286339	0.617806
AX-177643426	B08	5678750	4.67284	****				AX-147262896	B10	1452808	0.518523
AX-147257458	B08	6300409	0.396931					AX-147262944	B10	1916443	0.725692
AX-147257470	B08	6406730	0.743259					AX-147234894	B10	2047199	1.01053
AX-147257484	B08	6642505	0.743288					AX-176791790	B10	2284240	1.6753
AX-177642834	B08	7259589	0.296194					AX-176791992	B10	3020920	0.803755
AX-147257516	B08	7439204	0.231769					AX-147263035	B10	3199247	0.803766
AX-176823225	B08	7798891	0.240621					AX-147263086	B10	3699190	0.826813
AX-147257729	B08	13636051	0.0433274					AX-147263108	B10	3837269	0.825412
AX-176806766	B08	15969665	0.174576					AX-147263112	B10	3847206	1.27043
AX-176819410	B08	15974491	0.174576					AX-147263125	B10	4025926	1.35591
AX-176808584	B08	15975986	0.165182					AX-147263173	B10	4582823	0.800734
AX-176809193	B08	15979205	0.165181					AX-176809160	B10	4583984	0.800547
AX-176807298	B08	16126958	0.153216					AX-147263202	B10	5147691	0.667985
AX-147257828	B08	17906817	0.179287					AX-147263217	B10	5531448	0.836997
AX-147257868	B08	19625060	6.31416	****				AX-147263233	B10	5961085	0.623795
AX-147257934	B08	21828533	0.239808					AX-147211999	B10	8317223	1.10591
AX-147257993	B08	23833277	0.417536					AX-147263331	B10	9190742	0.800131
AX-177640112	B08	25534918	0.569017					AX-176791703	B10	9968629	3.94161	***
AX-147258047	B08	26013615	0.444027					AX-147263401	B10	10118372	4.05177	***
AX-177641883	B08	28490879	0.377832					AX-147263446	B10	10717070	5.40188	****
AX-176804099	B08	28852312	0.254562					AX-147263491	B10	11214359	8.34141	****
AX-176793999	B08	29255254	0.0559994					AX-177639192	B10	11960833	6.34689	****
AX-176805513	B08	29255307	0.0621422					AX-177644269	B10	13247245	7.45679	****
AX-176808255	B08	29255497	0.0621425					AX-176791776	B10	14052510	7.32979	****
AX-176815701	B08	29255521	0.0621431					AX-177642573	B10	14149454	7.29386	****
AX-176814820	B08	30041320	0.255395					AX-147263607	B10	15189329	5.36562	****
AX-177641506	B08	31741859	3.76136	***				AX-177639228	B10	19663894	3.17833
AX-147228957	B08	33072693	0.121631					AX-147263769	B10	22491904	3.17645
AX-176805053	B08	36820073	0.646336					AX-176792092	B10	25381175	3.46829
AX-147225568	B08	36820742	0.646374					AX-147263844	B10	27366049	2.82445
AX-147225570	B08	36820910	0.646371					AX-147264064	B10	60634925	0.45375
AX-176812838	B08	36821218	0.563145					AX-176810036	B10	96793488	0.992873
AX-176807585	B08	36823688	0.549575					AX-147264208	B10	101217593	3.13833
AX-176802601	B08	36826493	0.532688					AX-177637244	B10	102847093	3.23154
AX-176793825	B08	36828604	0.519006					AX-177638757	B10	106292220	4.22196	***
AX-176808178	B08	36833226	0.519007					AX-147264328	B10	111150033	3.44084
AX-176796159	B08	36833230	0.51898					AX-147264395	B10	113584807	4.08905	***
AX-176792723	B08	36833243	0.518958					AX-147264426	B10	115833661	2.75701
AX-147225598	B08	36838798	0.319967					AX-177639479	B10	116395569	4.46401	***
AX-176803800	B08	36839131	0.319972					AX-147264511	B10	118693317	2.18161
AX-176815070	B08	36839576	0.319983					AX-176791558	B10	119275183	0.780801
AX-147258408	B08	73340378	0.314517					AX-176791820	B10	123961122	2.59744
AX-147258422	B08	77662040	0.400363					AX-147264750	B10	125927111	2.62749
AX-147258593	B08	101670375	0.438256					AX-177639345	B10	126150964	2.57312
AX-147258622	B08	102977322	0.670452					AX-147264825	B10	128125458	2.6741
AX-147258634	B08	103537009	0.719701					AX-176791475	B10	129422452	2.5486
AX-147231175	B08	108072552	0.851455					AX-147264913	B10	130237287	2.5013
AX-176819642	B08	108072552	0.851455					AX-147264945	B10	130799987	2.53834
AX-177644132	B08	109905939	7.08991	****				AX-147265042	B10	131806031	4.77664	****
AX-177643803	B08	110550614	1.43385					AX-176791882	B10	131908361	4.79705	****
AX-147231262	B08	112925307	0.940164					AX-177642086	B10	133289435	3.74573
AX-147258867	B08	113226569	0.938029					AX-176791643	B10	133449357	3.90851	***
AX-147258872	B08	113312961	0.858007					AX-147265254	B10	133759254	4.58569	***
AX-147258881	B08	113601371	0.813869					AX-147265272	B10	133880109	4.55583	***
AX-147258883	B08	113633453	0.854031					AX-177643056	B10	133954862	4.53063	***
AX-147259027	B08	118293002	0.713645					AX-147265291	B10	133973530	4.52712	***
AX-147259053	B08	119368164	1.12626					AX-147265307	B10	134076186	4.52712	***
AX-147259163	B08	121556595	4.79619	****				AX-147265486	B10	135303526	4.6523	****
AX-147259182	B08	122223999	4.79585	****				AX-147265500	B10	135518938	4.64421	****
AX-147259195	B08	122363848	4.79583	****				AX-147265510	B10	135552827	4.64554	****
AX-147259220	B08	122831418	4.79584	****				AX-177639120	B10	135713446	4.63455	****
AX-147259221	B08	122897408	4.79455	****				AX-147237311	B10	135771077	5.12373	****
AX-147259300	B08	124336392	4.64054	****				AX-147265545	B10	135808237	5.17087	****
AX-147259351	B08	125473859	5.20077	****
AX-176792136	B08	125956737	5.02589	****
AX-147259480	B08	128158193	1.68007
AX-147259486	B08	128211868	1.8925
AX-147259496	B08	128323260	1.64847
AX-176792038	B08	128637022	0.441182
AX-147259523	B08	128894510	0.423778
AX-147228772	B09	294225	0.517496
AX-147228780	B09	370636	0.449482
AX-147259610	B09	444888	0.449444
AX-147259657	B09	1032577	2.80629
AX-147259681	B09	1404687	0.557213
AX-147259684	B09	1418475	0.547373
AX-147259699	B09	1605429	0.54737
AX-147259703	B09	1619980	0.558911
AX-147259787	B09	2624818	0.67979
AX-147259791	B09	2719395	0.500193
AX-176791782	B09	2862787	0.440879
AX-147259838	B09	3508840	0.552312
AX-176791539	B09	3807796	0.384679
AX-147259886	B09	3956919	0.349039
AX-147259963	B09	5083710	2.24152
AX-147260194	B09	10135479	2.27081
AX-147260211	B09	10376197	3.08508
AX-147260230	B09	10719853	2.95084
AX-147260234	B09	10801176	3.25318
AX-147260445	B09	13954905	0.788525
AX-147260452	B09	13983443	0.789744
AX-147260453	B09	13984051	0.789465
AX-147260518	B09	15640616	0.574408
AX-177643092	B09	19855804	0.404077
AX-177643504	B09	20598327	0.260953
AX-177640604	B09	22210750	0.501787
AX-176792156	B09	24898740	0.720897
AX-147260811	B09	26142110	0.851689
AX-147260846	B09	27563919	0.632208
AX-147260872	B09	29510686	0.717137
AX-147260916	B09	32634012	3.29715
AX-147260926	B09	33805614	2.62002
AX-147260956	B09	36640447	3.12795
AX-147261029	B09	42956353	3.08102
AX-147261091	B09	50015557	3.26317
AX-176811401	B09	50024895	3.26317
AX-176812165	B09	50027352	3.26317
AX-176796601	B09	50051330	3.29541
AX-176801542	B09	50055719	3.3344
AX-147233346	B09	50058047	3.33438
AX-147261211	B09	79642894	2.7592
AX-147261253	B09	89388921	3.01996
AX-176810869	B09	97172470	3.20553
AX-176796853	B09	97613023	2.96716
AX-177640347	B09	112363497	4.30534	***
AX-176801597	B09	114206705	3.96092	***
AX-147261634	B09	125220602	3.99085	***
AX-177638066	B09	126944854	4.1742	***
AX-177637637	B09	126996989	5.24173	****
AX-147261694	B09	128347424	5.03694	****
AX-177637290	B09	129848706	1.11018
AX-147261853	B09	135376574	4.7911	****
AX-176808207	B09	137716024	9.12992	****
AX-147261968	B09	138035545	8.31842	****
AX-147262017	B09	138989973	9.00345	****
AX-147262029	B09	139579365	5.82462	****
AX-176792005	B09	140542408	5.62029	****
AX-147262139	B09	140933231	5.62033	****
AX-177644226	B09	141745302	3.87087	***
AX-147262211	B09	141943686	3.37544
AX-147209362	B10	484822	2.58525
AX-147262827	B10	757821	1.83029
AX-147262885	B10	1286339	1.90832
AX-147262896	B10	1452808	2.13544
AX-147262944	B10	1916443	2.89253
AX-147234894	B10	2047199	3.09131
AX-176791790	B10	2284240	3.03621
AX-176791992	B10	3020920	3.28028
AX-147263035	B10	3199247	3.25483
AX-147263086	B10	3699190	3.30991
AX-147263108	B10	3837269	3.12823
AX-147263112	B10	3847206	3.13215
AX-147263125	B10	4025926	3.35862
AX-147263173	B10	4582823	1.51808
AX-176809160	B10	4583984	1.51808
AX-147263202	B10	5147691	1.47325
AX-147263217	B10	5531448	1.44611
AX-147263233	B10	5961085	1.41791
AX-147211999	B10	8317223	2.0917
AX-147263331	B10	9190742	1.66722
AX-176791703	B10	9968629	1.115
AX-147263401	B10	10118372	1.21322
AX-147263446	B10	10717070	0.460675
AX-147263491	B10	11214359	0.585812
AX-177639192	B10	11960833	0.446587
AX-177644269	B10	13247245	0.496515
AX-176791776	B10	14052510	0.488189
AX-177642573	B10	14149454	0.525547
AX-147263607	B10	15189329	0.793021
AX-177639228	B10	19663894	0.760053
AX-147263769	B10	22491904	0.787854
AX-176792092	B10	25381175	0.630836
AX-147263844	B10	27366049	0.829478
AX-176810036	B10	96793488	1.19454
AX-147264208	B10	101217593	0.796874
AX-177637244	B10	102847093	0.882657
AX-177638757	B10	106292220	1.17058
AX-147264328	B10	111150033	0.656084
AX-147264395	B10	113584807	0.658578
AX-147264426	B10	115833661	0.616983
AX-177639479	B10	116395569	0.585724
AX-147264511	B10	118693317	0.428781
AX-176791558	B10	119275183	0.589643
AX-176791820	B10	123961122	0.428271
AX-147264750	B10	125927111	0.562811
AX-177639345	B10	126150964	0.797661
AX-147264825	B10	128125458	0.714439
AX-176791475	B10	129422452	0.715742
AX-147264913	B10	130237287	0.71015
AX-147264945	B10	130799987	0.442286
AX-147265042	B10	131806031	0.080033
AX-176791882	B10	131908361	0.082499
AX-177642086	B10	133289435	0.617998
AX-176791643	B10	133449357	0.246637
AX-147265254	B10	133759254	0.146287
AX-147265272	B10	133880109	0.146161
AX-177643056	B10	133954862	0.146304
AX-147265291	B10	133973530	0.146287
AX-147265307	B10	134076186	0.147135
AX-147265486	B10	135303526	0.163552
AX-147265500	B10	135518938	0.176828
AX-147265510	B10	135552827	0.175857
AX-177639120	B10	135713446	0.125031
AX-147237311	B10	135771077	0.151317
AX-147265545	B10	135808237	0.151192

## Sheet: Rust
BC3F2				****1%	***5%		BC3F4				****1%	***5%		BC3F5				****1%	***5%		BC4F2				****1%	***5%
SNP Affy	Chrom.	Position (bp)	LOD	Sign.			SNP Affy	Chrom.	Position (bp)	LOD	Sign.			SNP Affy	Chrom.	Position (bp)	LOD	Sign.			SNP Affy	Chrom.	Position (bp)	LOD	Sign.
AX-147207636	A01	230496	5.5122	****			AX-147207653	A01	328589	1.13833				AX-147211929	A01	100451974	0.0603788				AX-176823530	A02	107155	0.358683
AX-147207653	A01	328589	7.05455	****	Thresholds:		AX-176791317	A01	510521	0.671003		Thresholds:		AX-176821405	A01	100594409	0.0603788		Thresholds:		AX-147212141	A02	174898	0.358683		Thresholds:
AX-176791317	A01	510521	7.34251	****	1% > 4.47		AX-147265635	A01	595640	0.670999		1% > 4.51		AX-147211986	A01	102053529	0.0603781		1% > 3.6		AX-176792377	A02	177786	0.358683		1% > 4.17
AX-147265635	A01	595640	7.33673	****	5% > 3.73		AX-147207739	A01	738171	0.671003		5% > 3.71		AX-147211994	A01	102165459	0.0603788		5% > 2.79		AX-147212174	A02	314196	0.358683		5% > 3.23
AX-147207739	A01	738171	7.33711	****			AX-147207744	A01	773107	0.671003				AX-147212014	A01	102837904	0.0603331				AX-147212176	A02	327195	0.358683
AX-147207741	A01	748457	7.33703	****			AX-147207750	A01	785346	0.671003				AX-176815645	A01	103615126	2.56038				AX-147212177	A02	328324	0.358683		No QTLs
AX-147207744	A01	773107	7.33698	****			AX-147207751	A01	795710	0.671004				AX-147212041	A01	104077042	0.0792765				AX-147212216	A02	524914	0.358683
AX-147207750	A01	785346	7.33698	****			AX-147207766	A01	907490	0.724481				AX-176803609	A01	104121701	0.0808186				AX-177638711	A02	524938	0.358683
AX-147207751	A01	795710	7.33703	****			AX-147207768	A01	922352	0.724104				AX-176792555	A01	104855229	0.08082				AX-147212220	A02	529301	0.358683
AX-147207766	A01	907490	7.32632	****			AX-147207782	A01	1006721	0.768619				AX-147212065	A01	105355893	0.08082				AX-147260412	A02	549740	0.358683
AX-147207768	A01	922352	7.3274	****			AX-147207792	A01	1040768	0.780711				AX-147212094	A01	106856793	0.08082				AX-176823854	A02	610745	0.358683
AX-147207782	A01	1006721	7.33703	****			AX-147207811	A01	1117549	0.780711											AX-147212305	A02	770726	0.358683
AX-147207792	A01	1040768	7.33703	****			AX-147207865	A01	1399658	0.671				AX-176823530	A02	107155	0.119513				AX-177637178	A02	771251	0.358683
AX-147207796	A01	1043415	7.33703	****			AX-147207867	A01	1427181	0.670999				AX-147212141	A02	174898	0.0603943				AX-147212320	A02	805196	0.358683
AX-147207810	A01	1117391	7.33703	****			AX-147207874	A01	1450824	0.671002				AX-147212216	A02	524914	0.0603793				AX-177639193	A02	857614	0.358683
AX-147207811	A01	1117549	7.33703	****			AX-147207931	A01	1651483	0.670999				AX-177639193	A02	857614	0.0603787				AX-177638310	A02	902287	0.358683
AX-147265656	A01	1185064	7.26958	****			AX-147207942	A01	1705064	0.671				AX-177638310	A02	902287	0.0603788				AX-177642823	A02	902714	0.358683
AX-147207859	A01	1397197	7.144	****			AX-147207949	A01	1724608	0.670999				AX-177642823	A02	902714	0.0603788				AX-177644248	A02	950880	0.358683
AX-176791373	A01	1399041	7.144	****			AX-147207960	A01	1777026	0.670999				AX-177637363	A02	1078390	0.0603788				AX-177637363	A02	1078390	0.358655
AX-147207865	A01	1399658	7.144	****			AX-147207971	A01	1788137	0.670999				AX-176821132	A02	1173968	0.0603788				AX-176821132	A02	1173968	0.358683
AX-147207867	A01	1427181	7.20558	****			AX-147207989	A01	1845128	0.670999				AX-176819339	A02	1200821	0.0603789				AX-147212409	A02	1180998	0.358683
AX-147207874	A01	1450824	7.20445	****			AX-176791319	A01	1873370	0.671003				AX-176823317	A02	1444372	0.0815288				AX-176819339	A02	1200821	0.358683
AX-147207931	A01	1651483	7.85826	****			AX-147208012	A01	1916852	0.780729				AX-177637135	A02	1756905	0.161757				AX-147212428	A02	1225369	0.358683
AX-147207942	A01	1705064	7.85413	****			AX-147208016	A01	1950993	0.780733				AX-176821270	A02	1795704	0.0587038				AX-147212463	A02	1333411	0.358633
AX-147207949	A01	1724608	7.85365	****			AX-147208027	A01	1979329	0.780733				AX-176820678	A02	2413776	0.0603786				AX-176823317	A02	1444372	0.358683
AX-147207952	A01	1734212	7.85375	****			AX-147208055	A01	2010809	0.780732				AX-147240119	A02	2483357	0.0603788				AX-147212511	A02	1556477	0.358683
AX-147207960	A01	1777026	7.9243	****			AX-147208069	A01	2110707	0.736128				AX-176822484	A02	2495254	0.0603788				AX-177637135	A02	1756905	0.358683
AX-147207965	A01	1783428	7.93192	****			AX-147208101	A01	2278223	0.740511				AX-176819115	A02	2495363	0.0603788				AX-176821270	A02	1795704	0.358683
AX-147207971	A01	1788137	7.93584	****			AX-147208106	A01	2304266	0.729232				AX-147240131	A02	2497226	0.0603788				AX-176820678	A02	2413776	0.358683
AX-147207989	A01	1845128	7.936	****			AX-147208131	A01	2439513	0.671009				AX-147212659	A02	2557316	0.0603788				AX-147240119	A02	2483357	0.358683
AX-176791319	A01	1873370	7.93474	****			AX-147208153	A01	2784796	0.671001				AX-147212669	A02	2594478	0.0603788				AX-176822484	A02	2495254	0.358684
AX-147208012	A01	1916852	7.51137	****			AX-147208184	A01	2897855	0.670999				AX-147212672	A02	2595255	0.0603788				AX-176819115	A02	2495363	0.358683
AX-147208016	A01	1950993	7.51138	****			AX-147208217	A01	3034640	0.670999				AX-176821041	A02	2599915	0.0603788				AX-147240131	A02	2497226	0.358683
AX-147208027	A01	1979329	7.93549	****			AX-147208225	A01	3071017	0.670999				AX-147212687	A02	2640814	0.0603788				AX-176823935	A02	2530491	0.358683
AX-147208038	A01	1984099	7.93549	****			AX-147208252	A01	3128533	0.670999				AX-176819218	A02	2782248	0.0598764				AX-147212659	A02	2557316	0.358683
AX-147208052	A01	2010272	7.90645	****			AX-147208277	A01	3171803	0.670999				AX-176821862	A02	2827935	0.0603787				AX-147212669	A02	2594478	0.358698
AX-147208055	A01	2010809	7.90645	****			AX-147208313	A01	3335170	0.672893				AX-147212764	A02	2931093	0.0603788				AX-147212672	A02	2595255	0.358683
AX-147208069	A01	2110707	7.93797	****			AX-147208320	A01	3362317	0.670999				AX-147240252	A02	2931111	0.0603788				AX-176821041	A02	2599915	0.358683
AX-147208100	A01	2272833	7.69262	****			AX-147208345	A01	3438883	0.670999				AX-147212765	A02	2932724	0.0603788				AX-147212687	A02	2640814	0.358683
AX-147208101	A01	2278223	7.6943	****			AX-147208349	A01	3441950	0.670999				AX-176821123	A02	3001008	0.0603788				AX-176819218	A02	2782248	0.358683
AX-147208105	A01	2303999	7.69764	****			AX-147208356	A01	3454654	0.670999				AX-176822843	A02	3036319	0.0603788				AX-176821862	A02	2827935	0.358683
AX-147208106	A01	2304266	7.69764	****			AX-147208366	A01	3462248	0.670999				AX-176823331	A02	3040802	0.0603788				AX-147212764	A02	2931093	0.358683
AX-147208130	A01	2434150	7.69457	****			AX-147208411	A01	3611395	0.676151				AX-176820632	A02	3049512	0.0603788				AX-147240252	A02	2931111	0.358683
AX-147208131	A01	2439513	7.6979	****			AX-147208422	A01	3665567	0.678025				AX-147212820	A02	3375612	0.0603788				AX-147212765	A02	2932724	0.358683
AX-147208153	A01	2784796	7.80305	****			AX-176819154	A01	3750316	0.670999				AX-147240352	A02	3377119	0.0603788				AX-176821123	A02	3001008	0.358683
AX-147208184	A01	2897855	7.82158	****			AX-147208456	A01	3845309	0.670999				AX-176820410	A02	3377383	0.0603791				AX-176822843	A02	3036319	0.358683
AX-147208217	A01	3034640	7.80208	****			AX-147208459	A01	3857470	0.670999				AX-176820559	A02	3486571	2.22832				AX-176823331	A02	3040802	0.358683
AX-147208225	A01	3071017	7.81543	****			AX-147208462	A01	3864763	0.670999				AX-176823912	A02	3490189	1.91394				AX-176820632	A02	3049512	0.358683
AX-147265734	A01	3120188	7.81756	****			AX-147208477	A01	3947660	0.670999				AX-177639986	A02	3666632	2.08345				AX-147212820	A02	3375612	0.358683
AX-147208245	A01	3120434	7.81756	****			AX-147208481	A01	3986510	0.671001				AX-177638814	A02	3667446	2.08361				AX-147240352	A02	3377119	0.358683
AX-147208252	A01	3128533	7.81756	****			AX-147208523	A01	4143724	0.838634				AX-147212858	A02	3769110	2.44947				AX-176820410	A02	3377383	0.358608
AX-147208277	A01	3171803	7.81582	****			AX-147208570	A01	4472019	0.671001				AX-147240478	A02	3939035	2.49979				AX-176820559	A02	3486571	1.66182
AX-147208281	A01	3173724	7.81582	****			AX-147208592	A01	4568812	0.670999				AX-147240497	A02	4085059	2.46887				AX-176823912	A02	3490189	1.66487
AX-147265751	A01	3331989	7.81957	****			AX-147208614	A01	4678382	0.670999				AX-176819448	A02	4403696	2.49983				AX-177639986	A02	3666632	1.91671
AX-147208313	A01	3335170	7.81756	****			AX-147208650	A01	4901872	0.670999				AX-147240530	A02	4723506	2.35914				AX-177638814	A02	3667446	1.91686
AX-147208320	A01	3362317	7.81756	****			AX-147208681	A01	4956444	0.670999				AX-147240532	A02	4724850	2.35914				AX-147212858	A02	3769110	1.8469
AX-147208345	A01	3438883	7.60594	****			AX-147208686	A01	4971720	0.670999				AX-147212940	A02	4851345	2.35914				AX-147240478	A02	3939035	1.84685
AX-147208349	A01	3441950	7.60594	****			AX-147208687	A01	4971756	0.670999				AX-147212952	A02	4883639	2.35914				AX-147240497	A02	4085059	1.88252
AX-147208356	A01	3454654	7.62465	****			AX-147208809	A01	5589971	0.670998				AX-147240559	A02	4888203	2.35914				AX-176819448	A02	4403696	1.84347
AX-147265768	A01	3460850	7.60805	****			AX-147208902	A01	6200658	0.671012				AX-176792125	A02	4899160	2.35914				AX-176794388	A02	4576169	1.93278
AX-147208366	A01	3462248	7.60805	****			AX-147208929	A01	6337729	0.671017				AX-147212981	A02	5238703	2.35914				AX-147240530	A02	4723506	2.06948
AX-147208411	A01	3611395	3.95055	***			AX-147208979	A01	6679029	0.763904				AX-147212990	A02	5270226	2.35913				AX-147240532	A02	4724850	2.06954
AX-147208422	A01	3665567	3.95034	***			AX-147208980	A01	6679084	0.763902				AX-147213014	A02	5535443	1.67113				AX-147212940	A02	4851345	2.06948
AX-147208436	A01	3749655	3.84824	***			AX-147208981	A01	6679326	0.671007				AX-147213017	A02	5537506	1.67113				AX-147212952	A02	4883639	2.06948
AX-176819154	A01	3750316	3.84824	***			AX-147208984	A01	6679617	0.671				AX-147213029	A02	5597149	1.67113				AX-147240559	A02	4888203	2.0695
AX-147208456	A01	3845309	3.84757	***			AX-176816188	A01	8785306	0.267058				AX-177643693	A02	5796224	1.67113				AX-176792125	A02	4899160	2.06948
AX-147208459	A01	3857470	3.95028	***			AX-176794379	A01	9851850	4.04327	***			AX-177643707	A02	5816135	1.67113				AX-147212981	A02	5238703	2.06948
AX-147208462	A01	3864763	3.95028	***										AX-147213119	A02	6341150	1.67113				AX-147212990	A02	5270226	2.06948
AX-147208477	A01	3947660	3.94215	***			AX-176821862	A02	2827935	1.18775				AX-147213146	A02	6593512	1.67113				AX-147213014	A02	5535443	2.06948
AX-147208481	A01	3986510	3.95034	***			AX-147212764	A02	2931093	1.18734				AX-147213155	A02	6827826	1.693				AX-147213017	A02	5537506	2.06948
AX-147208523	A01	4143724	3.94862	***			AX-147240252	A02	2931111	1.18734				AX-147213230	A02	8195496	1.63361				AX-147213029	A02	5597149	2.07999
AX-176791360	A01	4147264	3.94363	***			AX-147212765	A02	2932724	1.17899				AX-147213245	A02	8377985	1.63361				AX-177643693	A02	5796224	2.06948
AX-147208570	A01	4472019	3.95034	***			AX-176821123	A02	3001008	1.17905				AX-147213292	A02	8798082	1.63361				AX-177643707	A02	5816135	2.06948
AX-147208592	A01	4568812	3.95034	***			AX-176821465	A02	3034367	0.956493				AX-147213317	A02	9782639	1.63361				AX-147213119	A02	6341150	1.93743
AX-147208614	A01	4678382	3.85934	***			AX-176822843	A02	3036319	0.956495				AX-147213328	A02	10054069	1.63361				AX-147213146	A02	6593512	1.93743
AX-147237795	A01	4889328	4.3623	***			AX-176820632	A02	3049512	1.185				AX-176823661	A02	14728483	1.24777				AX-147213155	A02	6827826	1.93743
AX-147208650	A01	4901872	4.36341	***			AX-147240352	A02	3377119	1.18728				AX-147213472	A02	14937685	1.63361				AX-147213230	A02	8195496	1.78723
AX-147208681	A01	4956444	4.00203	***			AX-176820410	A02	3377383	1.18728				AX-147213476	A02	14943833	1.63361				AX-147213245	A02	8377985	1.83776
AX-147208686	A01	4971720	4.00202	***			AX-176820559	A02	3486571	0.515191				AX-147213604	A02	25951674	1.63361				AX-147213292	A02	8798082	1.83777
AX-147208687	A01	4971756	4.00202	***			AX-176823912	A02	3490189	0.516718				AX-147213615	A02	28157230	1.63361				AX-147213317	A02	9782639	1.83777
AX-176815649	A01	5361582	4.25017	***			AX-177639986	A02	3666632	0.872689				AX-147213631	A02	28574740	1.63361				AX-147213328	A02	10054069	1.83777
AX-147208809	A01	5589971	4.31735	***			AX-177638814	A02	3667446	0.922249				AX-176799890	A02	30279507	1.71094				AX-176823661	A02	14728483	1.12963
AX-176822429	A01	6096023	4.24515	***			AX-147212858	A02	3769110	0.518243				AX-176807891	A02	32202107	1.47224				AX-147213472	A02	14937685	1.5932
AX-147208902	A01	6200658	4.28732	***			AX-147240478	A02	3939035	0.531065				AX-176806576	A02	33864947	1.52073				AX-147213476	A02	14943833	1.5932
AX-147208929	A01	6337729	4.51125	****			AX-147240497	A02	4085059	0.523903				AX-147213672	A02	36455473	1.6336				AX-147213604	A02	25951674	1.593
AX-147208979	A01	6679029	4.27718	***			AX-176819448	A02	4403696	0.569969				AX-147213689	A02	39267704	1.63361				AX-147213615	A02	28157230	1.5932
AX-147208980	A01	6679084	4.27718	***			AX-147240530	A02	4723506	0.419026				AX-147213719	A02	42029329	1.63358				AX-147213631	A02	28574740	1.5932
AX-147208981	A01	6679326	4.27718	***			AX-147240532	A02	4724850	0.465329				AX-147213736	A02	43374948	1.63365				AX-176799890	A02	30279507	1.71175
AX-147208984	A01	6679617	4.27718	***			AX-147212940	A02	4851345	0.394839				AX-147213756	A02	47309222	1.63361				AX-176807891	A02	32202107	1.53637
AX-176820201	A01	29854378	2.68787				AX-147212952	A02	4883639	0.394791				AX-176810943	A02	50000826	1.63361				AX-176806576	A02	33864947	1.76553
AX-147211718	A01	92596134	2.29447				AX-147240559	A02	4888203	0.394579				AX-147213789	A02	52237448	1.63357				AX-147213672	A02	36455473	1.59321
AX-147211790	A01	94844203	2.56537				AX-176792125	A02	4899160	0.394156				AX-176808317	A02	61811601	2.66478				AX-147213689	A02	39267704	1.54268
AX-147211796	A01	94937390	2.51377				AX-147212981	A02	5238703	0.39485				AX-176823269	A02	62077250	2.66607				AX-147213719	A02	42029329	1.59317
AX-147211814	A01	95704657	2.56041				AX-147212990	A02	5270226	0.394849				AX-147213949	A02	64315367	1.67088				AX-147213736	A02	43374948	1.5932
AX-147211853	A01	96982501	3.64981				AX-147213014	A02	5535443	0.292844				AX-147213981	A02	66368426	1.63361				AX-147213756	A02	47309222	1.5932
AX-147211860	A01	97205940	3.53591				AX-147213017	A02	5537506	0.292727				AX-147213986	A02	67017415	1.61498				AX-176810943	A02	50000826	1.5932
AX-176801835	A01	97347534	2.13873				AX-147213029	A02	5597149	0.286745				AX-176814130	A02	67418284	1.67112				AX-147213789	A02	52237448	1.5932
AX-176810594	A01	97504048	1.96008				AX-177643693	A02	5796224	0.278464				AX-176799928	A02	67418357	1.67113				AX-176808317	A02	61811601	0.358416
AX-147211869	A01	97988649	2.38866				AX-177643707	A02	5816135	0.278464				AX-147214000	A02	67418862	1.67121				AX-176823269	A02	62077250	0.290293
AX-176797791	A01	98044639	2.41754				AX-147213119	A02	6341150	0.278462				AX-147214001	A02	67418874	1.7141				AX-176814119	A02	62739123	0.404332
AX-147211886	A01	98852433	2.79261				AX-147213146	A02	6593512	0.278468				AX-147214003	A02	67420486	1.71434				AX-147213949	A02	64315367	1.61176
AX-147211900	A01	99546596	2.79261				AX-147213155	A02	6827826	0.386863				AX-147214004	A02	67420580	1.69488				AX-177644064	A02	65804378	1.19473
AX-147211923	A01	100291833	1.16958				AX-147213230	A02	8195496	0.452294				AX-176822439	A02	69099226	0.174269				AX-147213981	A02	66368426	1.66063
AX-147211929	A01	100451974	1.30406				AX-147213245	A02	8377985	0.414906				AX-176806977	A02	73927285	1.61683				AX-147213986	A02	67017415	1.77055
AX-176821405	A01	100594409	1.169				AX-147213292	A02	8798082	0.305254				AX-147214185	A02	75731986	1.63361				AX-176814130	A02	67418284	0.855118
AX-147211986	A01	102053529	5.5412	****			AX-147213317	A02	9782639	0.223799				AX-147214234	A02	78187923	1.63363				AX-176799928	A02	67418357	0.854819
AX-147211994	A01	102165459	5.6812	****			AX-147213328	A02	10054069	0.229089				AX-147241878	A02	79414030	1.74783				AX-147214000	A02	67418862	0.993835
AX-147212014	A01	102837904	5.88175	****			AX-176823661	A02	14728483	0.0478579				AX-147241920	A02	80297365	1.74781				AX-147214001	A02	67418874	0.95094
AX-147212041	A01	104077042	5.69152	****			AX-147213472	A02	14937685	0.223787				AX-176810329	A02	80730421	1.74781				AX-176793869	A02	67419937	0.953059
AX-176803609	A01	104121701	5.72415	****			AX-147213476	A02	14943833	0.223787				AX-147214462	A02	81019015	1.74053				AX-147214003	A02	67420486	0.783834
AX-176792555	A01	104855229	5.12443	****			AX-147213604	A02	25951674	0.231258				AX-147214521	A02	81609784	1.14785				AX-147214004	A02	67420580	0.76547
AX-147212065	A01	105355893	5.79884	****			AX-147213615	A02	28157230	0.223787				AX-176803866	A02	82726495	1.63361				AX-176822439	A02	69099226	0.752945
AX-147212094	A01	106856793	5.7108	****			AX-147213631	A02	28574740	0.223788				AX-147242084	A02	82726525	1.63361				AX-176806977	A02	73927285	1.20241
							AX-176799890	A02	30279507	0.333348				AX-147214609	A02	82990736	1.64735				AX-176814164	A02	74475889	0.886481
AX-176820678	A02	2413776	2.8312				AX-176807891	A02	32202107	0.155951				AX-147214665	A02	83464195	1.787				AX-147214185	A02	75731986	1.77588
AX-147240119	A02	2483357	2.83882				AX-176806576	A02	33864947	0.901502				AX-147242202	A02	84827010	1.86727				AX-147214234	A02	78187923	1.82311
AX-176822484	A02	2495254	2.98555				AX-147213672	A02	36455473	0.224922				AX-147242208	A02	84880919	1.86728				AX-176817694	A02	79027979	1.40454
AX-176819115	A02	2495363	2.98554				AX-147213689	A02	39267704	0.252056				AX-177641619	A02	85209133	1.86727				AX-147241878	A02	79414030	1.71025
AX-147240131	A02	2497226	2.98553				AX-147213719	A02	42029329	0.24861				AX-147214809	A02	85315365	1.86728				AX-147241920	A02	80297365	1.56109
AX-176823935	A02	2530491	2.98483				AX-147213736	A02	43374948	0.223787				AX-147214811	A02	85316535	1.86728				AX-176810329	A02	80730421	1.61306
AX-147212659	A02	2557316	2.71361				AX-147213756	A02	47309222	0.312513				AX-176815768	A02	86069667	1.78136				AX-147214462	A02	81019015	1.43117
AX-147212669	A02	2594478	2.71341				AX-176810943	A02	50000826	0.263424				AX-176797275	A02	86659682	1.738				AX-147214521	A02	81609784	1.75833
AX-147212672	A02	2595255	2.71375				AX-147213789	A02	52237448	0.224938				AX-147214925	A02	87417752	1.74671				AX-176803866	A02	82726495	1.69643
AX-176821041	A02	2599915	2.71375				AX-176808317	A02	61811601	1.55264				AX-176808199	A02	89078850	2.50891				AX-147242084	A02	82726525	1.69644
AX-147212687	A02	2640814	2.71057				AX-176823269	A02	62077250	1.62987				AX-147215014	A02	89159922	2.53633				AX-147214609	A02	82990736	1.64534
AX-176819218	A02	2782248	2.012				AX-147213949	A02	64315367	0.316013				AX-176791419	A02	90812650	2.41776				AX-147214665	A02	83464195	1.73209
AX-176821862	A02	2827935	2.02344				AX-147213981	A02	66368426	0.223806				AX-147215181	A02	91638679	0.580949				AX-147242202	A02	84827010	1.92911
AX-147212764	A02	2931093	2.09449				AX-147213986	A02	67017415	0.318735				AX-147215210	A02	92077207	2.92537	***			AX-147242208	A02	84880919	1.92911
AX-147240252	A02	2931111	2.09333				AX-176799928	A02	67418357	0.121383				AX-147242820	A02	92612264	3.21209	***			AX-177641619	A02	85209133	1.92442
AX-147212765	A02	2932724	2.09244				AX-147214000	A02	67418862	0.153163				AX-147215231	A02	92958971	3.0935	***			AX-147214809	A02	85315365	1.9134
AX-176821123	A02	3001008	2.05628				AX-147214001	A02	67418874	0.153164				AX-147215261	A02	93790795	3.09299	***			AX-147214811	A02	85316535	1.91339
AX-176821465	A02	3034367	1.78371				AX-147214003	A02	67420486	0.373963											AX-176815768	A02	86069667	2.05323
AX-176822843	A02	3036319	1.77523				AX-147214004	A02	67420580	0.376212				AX-147215287	A03	263799	0.89617				AX-176797275	A02	86659682	3.20673
AX-176823331	A02	3040802	1.77523				AX-176822439	A02	69099226	1.78749				AX-147215321	A03	679404	0.897222				AX-147214925	A02	87417752	2.28336
AX-176820632	A02	3049512	2.70982				AX-176806977	A02	73927285	0.261909				AX-176808280	A03	1215455	2.89151	***			AX-176808199	A02	89078850	1.96701
AX-147212820	A02	3375612	2.75198				AX-147214185	A02	75731986	0.221446				AX-147215412	A03	1816539	2.8619	***			AX-147215014	A02	89159922	2.04309
AX-147240352	A02	3377119	2.7542				AX-147214234	A02	78187923	0.181488				AX-147215423	A03	1954749	2.6734				AX-176791419	A02	90812650	1.83258
AX-176820410	A02	3377383	2.75424				AX-147241878	A02	79414030	0.409882				AX-147215426	A03	1989523	2.67339				AX-147215181	A02	91638679	1.47479
AX-176820559	A02	3486571	4.51938	****			AX-147241920	A02	80297365	0.462594				AX-147215435	A03	2018420	2.72939				AX-147215183	A02	91655615	2.45229
AX-176823912	A02	3490189	4.51938	****			AX-176810329	A02	80730421	0.357496				AX-147215548	A03	3445290	2.71785				AX-147215210	A02	92077207	1.74687
AX-177639986	A02	3666632	5.33652	****			AX-147214462	A02	81019015	0.312995				AX-147215573	A03	3808006	2.73038				AX-147242811	A02	92317831	1.73512
AX-177638814	A02	3667446	5.33672	****			AX-147214521	A02	81609784	0.174348				AX-147215631	A03	4763112	2.73996				AX-147242820	A02	92612264	1.7287
AX-147212858	A02	3769110	5.61156	****			AX-176803866	A02	82726495	0.183111				AX-147243456	A03	5098297	2.73998				AX-147215231	A02	92958971	0.857029
AX-147240478	A02	3939035	5.59427	****			AX-147242084	A02	82726525	0.183111				AX-147215688	A03	6058658	2.68075				AX-147215261	A02	93790795	0
AX-147240497	A02	4085059	5.17103	****			AX-147214609	A02	82990736	0.183109				AX-176795320	A03	6247470	2.72786
AX-176819448	A02	4403696	5.34822	****			AX-147214665	A02	83464195	0.0228358				AX-147216005	A03	12100920	2.73371				AX-147218747	A04	105953	0.134997
AX-147240530	A02	4723506	5.40107	****			AX-147242202	A02	84827010	0.13282				AX-147216011	A03	12163967	2.73371				AX-147218752	A04	162912	0.135061
AX-147240532	A02	4724850	5.40107	****			AX-147242208	A02	84880919	0.120444				AX-147216035	A03	12860261	2.7287				AX-147218758	A04	186370	0.135061
AX-147212940	A02	4851345	5.47302	****			AX-177641619	A02	85209133	0.12334				AX-147216048	A03	13165005	2.7287				AX-147246426	A04	376077	0.130178
AX-147212952	A02	4883639	5.55921	****			AX-147214809	A02	85315365	0.111442				AX-147244080	A03	19856824	2.62409				AX-147218845	A04	814313	0.109522
AX-147240559	A02	4888203	5.55919	****			AX-147214811	A02	85316535	0.111442				AX-176816839	A03	19857137	2.62409				AX-147218852	A04	841579	0.146755
AX-176792125	A02	4899160	5.57037	****			AX-176815768	A02	86069667	0.0404056				AX-147216253	A03	20054501	2.76412				AX-147218905	A04	1330996	0.192111
AX-147212981	A02	5238703	5.7407	****			AX-176797275	A02	86659682	0.355721				AX-147216272	A03	20811542	2.67258				AX-147218913	A04	1362368	0.191953
AX-147212990	A02	5270226	5.74269	****			AX-147214925	A02	87417752	0.0359437				AX-176791993	A03	21813574	2.6726				AX-147218916	A04	1428407	0.168781
AX-147213014	A02	5535443	5.71058	****			AX-176808199	A02	89078850	0.293896				AX-147216341	A03	22722576	2.7287				AX-147218960	A04	1903375	0.187539
AX-147213017	A02	5537506	5.71058	****			AX-147215014	A02	89159922	0.405217				AX-176805403	A03	22782677	2.7287				AX-147218990	A04	2341583	0.155666
AX-147213029	A02	5597149	5.72889	****			AX-176791419	A02	90812650	0.407596				AX-147216380	A03	24640457	2.67272				AX-147219040	A04	2755924	0.101353
AX-177643693	A02	5796224	5.53006	****			AX-147215181	A02	91638679	1.18679				AX-147216499	A03	27510630	2.67269				AX-147219071	A04	2986913	0.176014
AX-177643707	A02	5816135	5.52208	****			AX-147215210	A02	92077207	1.91979				AX-147216512	A03	27813965	2.7287				AX-147219075	A04	3019208	0.176014
AX-147213119	A02	6341150	5.46554	****			AX-147242811	A02	92317831	1.87854				AX-176809707	A03	27858345	2.7287				AX-147219127	A04	3517899	0.128017
AX-147213146	A02	6593512	5.48879	****			AX-147242820	A02	92612264	2.08685				AX-147216517	A03	28031240	2.7287				AX-147219138	A04	3712941	0.128017
AX-147213155	A02	6827826	5.91874	****			AX-147215231	A02	92958971	2.30663				AX-147216537	A03	28985376	2.7287				AX-147246852	A04	4182894	0.291824
AX-147213230	A02	8195496	5.47644	****			AX-147215261	A02	93790795	2.30691				AX-176808649	A03	29487939	2.69232				AX-147219161	A04	4216107	0.0593068
AX-147213245	A02	8377985	5.40937	****										AX-176816872	A03	29641485	2.68047				AX-147219234	A04	5649484	0.0648039
AX-147213292	A02	8798082	5.57485	****			AX-147215287	A03	263799	2.1225				AX-176803667	A03	31870379	3.65719	****			AX-147219235	A04	5659551	0.117135
AX-147213317	A02	9782639	5.51633	****			AX-147215321	A03	679404	2.05163				AX-147216663	A03	33077138	2.84107	***			AX-147219264	A04	6680088	0.0868639
AX-147213328	A02	10054069	5.13803	****			AX-176808280	A03	1215455	2.34361				AX-176821107	A03	34011390	2.90526	***			AX-147219321	A04	7370876	0.170602
AX-147213472	A02	14937685	5.53968	****			AX-147215412	A03	1816539	2.09861				AX-176804002	A03	38187883	2.92236	***			AX-147219466	A04	10403187	0.20888
AX-147213476	A02	14943833	5.53967	****			AX-147215423	A03	1954749	2.13515				AX-176814356	A03	42785336	2.80539	***			AX-147219503	A04	12230276	0.20889
AX-147213604	A02	25951674	5.91062	****			AX-147215426	A03	1989523	2.14848				AX-176792425	A03	61827387	3.14709	***			AX-147219517	A04	12779729	0.199129
AX-147213615	A02	28157230	5.35457	****			AX-147215435	A03	2018420	2.14952				AX-176799401	A03	67200396	2.70422				AX-147219535	A04	13743326	0.199104
AX-147213631	A02	28574740	5.35458	****			AX-147215548	A03	3445290	2.19639				AX-147217043	A03	71754595	2.7287				AX-176817088	A04	15704111	0.0281648
AX-176799890	A02	30279507	5.4651	****			AX-147215573	A03	3808006	2.11229				AX-147217102	A03	85054303	2.7287				AX-176794358	A04	18231560	0.0789641
AX-176807891	A02	32202107	4.16415	***			AX-147215631	A03	4763112	2.27196				AX-147217108	A03	85255264	2.7287				AX-147219646	A04	18406467	0.0776007
AX-176806576	A02	33864947	3.26494				AX-147243456	A03	5098297	2.10985				AX-176805622	A03	91599139	0.770909				AX-147219761	A04	26018057	0.228552
AX-147213672	A02	36455473	5.43187	****			AX-147215688	A03	6058658	2.11311				AX-147217149	A03	94046003	1.04745				AX-176819555	A04	29697050	0.739918
AX-147213689	A02	39267704	5.85253	****			AX-176795320	A03	6247470	1.89501				AX-176819273	A03	96285079	2.1738				AX-176794649	A04	29697085	0.754935
AX-147213719	A02	42029329	5.80594	****			AX-147216005	A03	12100920	2.17154				AX-176811743	A03	96366712	2.17228				AX-147219833	A04	31201580	0.395418
AX-147213736	A02	43374948	5.35721	****			AX-147216011	A03	12163967	2.16841				AX-147217180	A03	100096163	2.07851				AX-176793200	A04	35343227	1.23797
AX-147213756	A02	47309222	5.68549	****			AX-147216035	A03	12860261	2.13528				AX-147217191	A03	100932532	2.09804				AX-147219924	A04	39355923	1.32496
AX-176810943	A02	50000826	5.41924	****			AX-147216048	A03	13165005	2.25672				AX-176794257	A03	103319854	1.84053				AX-147219969	A04	43910476	0.452246
AX-147213789	A02	52237448	5.82516	****			AX-176806944	A03	19855856	1.5931				AX-176812740	A03	105399156	2.71768				AX-147219994	A04	44691344	0.489581
AX-176808317	A02	61811601	1.30902				AX-147244080	A03	19856824	1.46445				AX-176803961	A03	105428219	2.7282				AX-176795801	A04	45012391	0.352178
AX-176823269	A02	62077250	1.30165				AX-176816839	A03	19857137	1.46452				AX-147217299	A03	108830624	2.67264				AX-147247611	A04	46297588	0.343515
AX-147213949	A02	64315367	4.50605	****			AX-147216253	A03	20054501	2.14558				AX-147217342	A03	110293559	2.72987				AX-176822168	A04	50533675	0.785178
AX-147213981	A02	66368426	5.59758	****			AX-147216272	A03	20811542	2.09071				AX-176792070	A03	112869336	2.74784				AX-147220040	A04	53185121	0.420293
AX-147213986	A02	67017415	5.84981	****			AX-176791993	A03	21813574	2.26662				AX-147217486	A03	115670557	2.67553				AX-147220067	A04	61632456	0.29159
AX-176799928	A02	67418357	5.82422	****			AX-147216341	A03	22722576	2.2475				AX-147217578	A03	117747708	2.67991				AX-176798038	A04	61990112	0.289062
AX-147214000	A02	67418862	5.82422	****			AX-176805403	A03	22782677	2.25054				AX-176811039	A03	118006557	2.82963	***			AX-147220074	A04	62753825	0.292633
AX-147214001	A02	67418874	5.82422	****			AX-147216380	A03	24640457	2.24741				AX-147217602	A03	118027452	2.7816				AX-176794277	A04	71833835	0.463691
AX-147214003	A02	67420486	5.82422	****			AX-147216499	A03	27510630	1.76637				AX-147217603	A03	118029011	2.77994				AX-176801614	A04	72118706	0.231513
AX-147214004	A02	67420580	5.82421	****			AX-147216512	A03	27813965	1.74393				AX-147217621	A03	118410190	2.72867				AX-147220154	A04	76565873	0.291601
AX-176806977	A02	73927285	5.90894	****			AX-176809707	A03	27858345	1.79726				AX-147217666	A03	119191245	2.7287				AX-147220181	A04	78282956	1.39368
AX-147214185	A02	75731986	5.93659	****			AX-147216517	A03	28031240	1.76672				AX-147217690	A03	119760138	2.7287				AX-147220197	A04	80024591	0.0822139
AX-147214234	A02	78187923	5.58566	****			AX-147216537	A03	28985376	1.73029				AX-176814835	A03	120779244	2.72879				AX-147220228	A04	82482114	0.422788
AX-147241878	A02	79414030	5.5945	****			AX-176808649	A03	29487939	1.16504				AX-176816506	A03	129244646	1.83615				AX-147220250	A04	85249177	0.258622
AX-147241920	A02	80297365	5.05993	****			AX-176816872	A03	29641485	1.45596											AX-147220275	A04	88047543	0.579735
AX-176810329	A02	80730421	5.79553	****			AX-176803667	A03	31870379	1.32675				AX-147218747	A04	105953	2.69163				AX-147220290	A04	89924581	0.642153
AX-147214462	A02	81019015	5.5589	****			AX-147216663	A03	33077138	1.77885				AX-147218752	A04	162912	2.90448	***			AX-176807447	A04	90141686	0.662929
AX-147214521	A02	81609784	5.22444	****			AX-176821107	A03	34011390	1.83437				AX-147218758	A04	186370	2.90443	***			AX-176817223	A04	91804337	0.444057
AX-176803866	A02	82726495	5.55584	****			AX-176804002	A03	38187883	1.779				AX-147246426	A04	376077	2.56325				AX-176813726	A04	92635030	0.497427
AX-147242084	A02	82726525	5.55584	****			AX-176814356	A03	42785336	1.02804				AX-147218845	A04	814313	2.55914				AX-147220329	A04	92696031	0.48147
AX-147214609	A02	82990736	5.78638	****			AX-176792425	A03	61827387	0.962993				AX-147218852	A04	841579	2.56385				AX-176819415	A04	95000363	0.482241
AX-147214665	A02	83464195	5.85338	****			AX-176799401	A03	67200396	2.38545				AX-147218905	A04	1330996	2.56385				AX-176800379	A04	103831183	0.22026
AX-147242202	A02	84827010	5.89135	****			AX-147217043	A03	71754595	1.70928				AX-147218913	A04	1362368	2.56385				AX-147220481	A04	103964432	0.421959
AX-147242208	A02	84880919	5.89087	****			AX-147217102	A03	85054303	2.0349				AX-147218916	A04	1428407	2.56385				AX-147220500	A04	104172441	0.360609
AX-177641619	A02	85209133	6.35796	****			AX-147217108	A03	85255264	2.03484				AX-147218960	A04	1903375	2.56385				AX-176807803	A04	105896594	0.208056
AX-147214809	A02	85315365	6.27965	****			AX-176805622	A03	91599139	1.28355				AX-147218990	A04	2341583	2.56385				AX-176807781	A04	107069698	0.126271
AX-147214811	A02	85316535	6.27966	****			AX-147217149	A03	94046003	0.764706				AX-147219040	A04	2755924	2.56385				AX-147220633	A04	108230713	0.226502
AX-176815768	A02	86069667	5.51659	****			AX-176819273	A03	96285079	1.69811				AX-147219071	A04	2986913	2.56385				AX-147220708	A04	110684871	0.125983
AX-176797275	A02	86659682	5.52738	****			AX-176811743	A03	96366712	1.68079				AX-147219075	A04	3019208	2.56385				AX-176812660	A04	111718457	0.340054
AX-147214925	A02	87417752	5.7477	****			AX-147217180	A03	100096163	2.02519				AX-147219127	A04	3517899	2.67258				AX-147220775	A04	112403290	0.318096
AX-176808199	A02	89078850	6.55674	****			AX-147217191	A03	100932532	1.85625				AX-147219138	A04	3712941	2.67259				AX-147248335	A04	112468907	0.321805
AX-147215014	A02	89159922	6.42808	****			AX-176812740	A03	105399156	0.919273				AX-147246852	A04	4182894	2.72808				AX-147220802	A04	112877017	0.352367
AX-176791419	A02	90812650	7.21581	****			AX-147217299	A03	108830624	1.53926				AX-147219161	A04	4216107	1.97577				AX-147248386	A04	113653210	0.505047
AX-147215181	A02	91638679	5.98318	****			AX-147217342	A03	110293559	2.23383				AX-147219235	A04	5659551	2.124				AX-147220883	A04	114359220	0.40254
AX-147215210	A02	92077207	1.30794				AX-176792070	A03	112869336	2.23369				AX-147219264	A04	6680088	2.12399				AX-176820963	A04	115830024	2.12454
AX-147242820	A02	92612264	1.43181				AX-147217486	A03	115670557	2.23375				AX-147219321	A04	7370876	2.12408				AX-147220968	A04	116352006	0.689996
AX-147215231	A02	92958971	1.14086				AX-147217578	A03	117747708	2.283				AX-147219466	A04	10403187	1.86734				AX-147221103	A04	118778510	1.5072
AX-147215261	A02	93790795	2.4907				AX-176811039	A03	118006557	2.36721				AX-147219503	A04	12230276	1.86728				AX-147221108	A04	118822674	1.44569
							AX-147217602	A03	118027452	2.42977				AX-147219517	A04	12779729	1.86726				AX-176796255	A04	119011071	1.41905
AX-147215287	A03	263799	1.93091				AX-147217603	A03	118029011	2.42845				AX-147219535	A04	13743326	1.86727				AX-147221200	A04	119664996	1.39943
AX-147215321	A03	679404	1.93093				AX-147217621	A03	118410190	2.18909				AX-176817088	A04	15704111	1.86666				AX-147221205	A04	119691567	1.38785
AX-176808280	A03	1215455	2.09859				AX-147217666	A03	119191245	1.69638				AX-147219646	A04	18406467	1.86727				AX-176791878	A04	120555571	1.38783
AX-147215412	A03	1816539	2.35449				AX-147217690	A03	119760138	1.82062				AX-147219761	A04	26018057	1.86727				AX-176815295	A04	120669932	1.38783
AX-147215423	A03	1954749	2.35446				AX-176814835	A03	120779244	1.87897				AX-176819555	A04	29697050	1.86728				AX-176820308	A04	120783536	0.628491
AX-147215426	A03	1989523	2.05791				AX-147217893	A03	124388226	2.23126				AX-176794649	A04	29697085	1.86728				AX-147221342	A04	121133496	0
AX-147215435	A03	2018420	2.05831				AX-176800613	A03	124936689	1.85822				AX-147219833	A04	31201580	1.86727				AX-147221410	A04	122540803	0
AX-147215548	A03	3445290	2.12697				AX-147218000	A03	125668369	2.84886				AX-147219969	A04	43910476	1.86729
AX-147215573	A03	3808006	2.44922				AX-147218048	A03	126684767	2.94236				AX-147247611	A04	46297588	1.9078				AX-147224270	A06	2747003	0.0151772
AX-147215631	A03	4763112	0.930657				AX-147218077	A03	127096366	2.94233				AX-147220040	A04	53185121	1.86728				AX-147224280	A06	2863952	0.0559978
AX-147243456	A03	5098297	0.872466				AX-147218089	A03	127285279	2.80108				AX-147220067	A04	61632456	1.86727				AX-176816233	A06	2915219	0.0559506
AX-147215688	A03	6058658	0.872444				AX-147218118	A03	127612693	2.95956				AX-147220074	A04	62753825	1.86728				AX-147224316	A06	3474367	0.0900207
AX-176795320	A03	6247470	0.856419				AX-147218132	A03	127785012	2.98899				AX-176794277	A04	71833835	1.90512				AX-147224370	A06	4261015	0.0875292
AX-147216005	A03	12100920	1.36949				AX-147218152	A03	128169984	2.97066				AX-176801614	A04	72118706	1.86731				AX-147224372	A06	4280783	0.0875289
AX-147216011	A03	12163967	1.36303				AX-147218253	A03	129126195	2.94852				AX-147220154	A04	76565873	1.86728				AX-147224420	A06	4687980	0.0295146
AX-147216035	A03	12860261	1.34794				AX-176816506	A03	129244646	3.1692				AX-147220197	A04	80024591	1.90801				AX-147224485	A06	5405523	0.0911837
AX-147216048	A03	13165005	1.29866				AX-147218304	A03	129649608	3.21773				AX-147220250	A04	85249177	1.86724				AX-147224487	A06	5411401	0.0905553
AX-176806944	A03	19855856	1.29887				AX-147218365	A03	130403989	2.8959				AX-147220275	A04	88047543	1.19741				AX-147224507	A06	5789236	0.148486
AX-147244080	A03	19856824	1.29886				AX-147218409	A03	130991357	2.21915				AX-147220290	A04	89924581	1.86725				AX-147224542	A06	6374094	0.0985098
AX-176816839	A03	19857137	1.29886				AX-147218439	A03	131460394	2.34853				AX-176817223	A04	91804337	1.86726				AX-147224620	A06	7334057	0.0556697
AX-147216253	A03	20054501	1.00983				AX-147218442	A03	131479751	2.27508				AX-176813726	A04	92635030	1.78704				AX-147224636	A06	7672324	0.129905
AX-147216272	A03	20811542	1.47836				AX-147218446	A03	131522694	2.27503				AX-147220329	A04	92696031	1.78703				AX-147224664	A06	8149649	0.0929869
AX-176791993	A03	21813574	1.16351											AX-176819415	A04	95000363	1.78703				AX-147224737	A06	9574526	0.0506775
AX-147216341	A03	22722576	1.57876				AX-147218747	A04	105953	0.0728834				AX-176800379	A04	103831183	1.78703				AX-147224808	A06	10688288	0.0295933
AX-176805403	A03	22782677	1.57362				AX-147218752	A04	162912	0.0301484				AX-147220481	A04	103964432	1.78703				AX-147224896	A06	11846893	0.303227
AX-147216380	A03	24640457	2.01456				AX-147218758	A04	186370	0.0301496				AX-147220500	A04	104172441	1.78703				AX-147224945	A06	12964569	0.0244743
AX-147216499	A03	27510630	1.0679				AX-147246426	A04	376077	0.0565695				AX-176807803	A04	105896594	1.28131				AX-176801863	A06	14539952	0.000318562
AX-147216512	A03	27813965	1.56548				AX-147218852	A04	841579	0.00154692				AX-147220633	A04	108230713	1.78701				AX-147225078	A06	15715130	0.000831915
AX-176809707	A03	27858345	1.57315				AX-147218905	A04	1330996	0.0102136				AX-147220708	A04	110684871	1.78703				AX-176819641	A06	16065445	1.60742e-06
AX-147216517	A03	28031240	1.5476				AX-147218913	A04	1362368	0.0100693				AX-176812660	A04	111718457	1.72968				AX-147225104	A06	16428344	0.00351558
AX-147216537	A03	28985376	1.96864				AX-147218916	A04	1428407	0.0577574				AX-147220775	A04	112403290	1.78703				AX-147225232	A06	20970182	0.0240468
AX-176808649	A03	29487939	1.692				AX-147218960	A04	1903375	0.0577827				AX-147248335	A04	112468907	1.78703				AX-176820316	A06	24872134	0.17659
AX-176816872	A03	29641485	1.91958				AX-147218990	A04	2341583	0.0577791				AX-147220802	A04	112877017	1.78703				AX-147225325	A06	32572657	0.0592236
AX-176803667	A03	31870379	0.949616				AX-147219040	A04	2755924	0.0102126				AX-147248386	A04	113653210	1.78703				AX-176792088	A06	34785196	0.0742909
AX-147216663	A03	33077138	1.6328				AX-147219071	A04	2986913	0.00548235				AX-147220883	A04	114359220	1.78708				AX-147225334	A06	34826404	0.0646779
AX-176821107	A03	34011390	2.19432				AX-147219075	A04	3019208	0.00511296											AX-177638959	A06	41229012	0.0315776
AX-176804002	A03	38187883	1.81109				AX-147219127	A04	3517899	0.0131322				AX-147224270	A06	2747003	2.03558				AX-176808798	A06	51690304	0.0018043
AX-176814356	A03	42785336	2.04575				AX-147219138	A04	3712941	0.0131327				AX-147224280	A06	2863952	2.03558				AX-147225368	A06	52572560	0.0189006
AX-176792425	A03	61827387	1.18276				AX-147246852	A04	4182894	0.0424515				AX-176816233	A06	2915219	2.03558				AX-147225443	A06	66423228	0.0370795
AX-176799401	A03	67200396	0.330593				AX-147219161	A04	4216107	0.00638074				AX-147224316	A06	3474367	2.03558				AX-176795818	A06	69243064	0.0454766
AX-147217043	A03	71754595	1.81134				AX-147219235	A04	5659551	0.185476				AX-147224370	A06	4261015	2.03558				AX-176796576	A06	69243068	0.0454751
AX-147217102	A03	85054303	1.81135				AX-147219264	A04	6680088	0.447731				AX-147224372	A06	4280783	2.03558				AX-147225464	A06	69465627	0.0207081
AX-147217108	A03	85255264	1.48998				AX-147219321	A04	7370876	0.405662				AX-147224420	A06	4687980	1.53154				AX-147225589	A06	79848717	0.008997
AX-176805622	A03	91599139	1.74524				AX-147219466	A04	10403187	0.270139				AX-147224485	A06	5405523	2.03578				AX-147225594	A06	79851479	0.0186641
AX-147217149	A03	94046003	1.675				AX-147219503	A04	12230276	0.25513				AX-147224487	A06	5411401	2.03558				AX-176817648	A06	79933722	0.0132429
AX-176819273	A03	96285079	1.96164				AX-147219517	A04	12779729	0.1352				AX-147224507	A06	5789236	2.03558				AX-147225614	A06	80755197	0.0556929
AX-176811743	A03	96366712	0.243764				AX-147219535	A04	13743326	0.111856				AX-147224542	A06	6374094	2.03558				AX-147225650	A06	82779126	0.0371887
AX-147217180	A03	100096163	1.81132				AX-176817088	A04	15704111	0.0220725				AX-147224620	A06	7334057	2.01152				AX-147225651	A06	82779734	0.0371887
AX-147217191	A03	100932532	1.81135				AX-147219646	A04	18406467	0.0161957				AX-147224636	A06	7672324	2.03557				AX-147225660	A06	83182983	0.0371887
AX-176812740	A03	105399156	1.50702				AX-147219761	A04	26018057	0.0131735				AX-147224664	A06	8149649	2.03558				AX-177642422	A06	84013115	0.0220846
AX-176803961	A03	105428219	1.74533				AX-176819555	A04	29697050	0.0117366				AX-147224737	A06	9574526	2.03557				AX-176811797	A06	85149263	0.180987
AX-147217299	A03	108830624	1.48678				AX-176794649	A04	29697085	0.0117366				AX-147224808	A06	10688288	1.9925				AX-147225729	A06	86792360	0.359143
AX-147217342	A03	110293559	2.01523				AX-147219817	A04	30093493	0.136795				AX-147224896	A06	11846893	1.95695				AX-147225805	A06	91658393	0.0112566
AX-176792070	A03	112869336	1.78242				AX-147219833	A04	31201580	0.0202841				AX-147224945	A06	12964569	1.99247				AX-176798419	A06	92280811	0.0265347
AX-147217486	A03	115670557	1.655				AX-147219969	A04	43910476	0.00411714				AX-176801863	A06	14539952	2.27911				AX-176798717	A06	93862557	0.0482888
AX-147217578	A03	117747708	1.22132				AX-147247611	A04	46297588	0.00556526				AX-147225078	A06	15715130	2.04039				AX-176796367	A06	94129577	0.0733199
AX-176811039	A03	118006557	1.34156				AX-147220040	A04	53185121	0.0215646				AX-176819641	A06	16065445	2.21193				AX-176808608	A06	97062653	0.239627
AX-147217602	A03	118027452	1.34156				AX-147220067	A04	61632456	0.000997688				AX-147225104	A06	16428344	1.99261				AX-147225934	A06	97902979	0.240788
AX-147217603	A03	118029011	1.34156				AX-147220074	A04	62753825	0.0074543				AX-147225232	A06	20970182	1.99247				AX-147225935	A06	97904366	0.241081
AX-147217621	A03	118410190	1.13535				AX-176794277	A04	71833835	0.184006				AX-147225325	A06	32572657	1.99247				AX-147225977	A06	98751250	0.179599
AX-147217666	A03	119191245	1.13534				AX-176801614	A04	72118706	0.0857188				AX-147225334	A06	34826404	1.99245				AX-147225997	A06	99250062	0.179597
AX-147217690	A03	119760138	1.13536				AX-147220154	A04	76565873	0.0207833				AX-177638959	A06	41229012	2.8913	***			AX-147226002	A06	99493705	0.179593
AX-176814835	A03	120779244	1.32355				AX-147220197	A04	80024591	0.0512842				AX-176808798	A06	51690304	2.55994				AX-176802106	A06	99772542	0.179591
AX-147217893	A03	124388226	0.638888				AX-147220250	A04	85249177	0.0512597				AX-147225368	A06	52572560	1.99203				AX-147226037	A06	100317242	0.152923
AX-176800613	A03	124936689	0.655561				AX-147220275	A04	88047543	0.00695211				AX-147225443	A06	66423228	1.9923				AX-147226076	A06	101146798	0.121142
AX-147218000	A03	125668369	0.655613				AX-147220290	A04	89924581	0.00396077				AX-176795818	A06	69243064	0.727729				AX-147226086	A06	101300979	0.105555
AX-147218048	A03	126684767	0.655577				AX-176817223	A04	91804337	0.0366641				AX-176796576	A06	69243068	0.727773				AX-147226154	A06	102679941	0.0272991
AX-147218077	A03	127096366	0.655569				AX-176813726	A04	92635030	0.0310176				AX-147225464	A06	69465627	1.96236				AX-147226157	A06	102694392	0.0288976
AX-147218089	A03	127285279	0.529024				AX-147220329	A04	92696031	0.0310167				AX-147225589	A06	79848717	1.72388				AX-147226178	A06	103181434	0.0331737
AX-147218118	A03	127612693	0.655582				AX-176819415	A04	95000363	0.0360077				AX-147225594	A06	79851479	1.71194				AX-147226189	A06	103342388	0.0331738
AX-147218132	A03	127785012	0.655586				AX-176800379	A04	103831183	1.17795				AX-176817648	A06	79933722	1.74491				AX-176821210	A06	104836791	0.0401128
AX-147218152	A03	128169984	0.655584				AX-147220481	A04	103964432	0.581859				AX-147225614	A06	80755197	1.99227				AX-147253814	A06	105027171	0.0359066
AX-147218253	A03	129126195	0.693141				AX-147220500	A04	104172441	0.598504				AX-147225650	A06	82779126	1.99247				AX-147226288	A06	105029082	0.0353238
AX-176816506	A03	129244646	0.267866				AX-176795032	A04	105034243	0.284029				AX-147225651	A06	82779734	1.99247				AX-147226305	A06	105157006	0.0587331
AX-147218304	A03	129649608	0.659265				AX-176807803	A04	105896594	0.678039				AX-147225660	A06	83182983	1.99245				AX-147226332	A06	105470812	0.0747062
AX-147218365	A03	130403989	0.857763				AX-147220633	A04	108230713	1.22589				AX-147225729	A06	86792360	0.268153				AX-176817780	A06	106951673	0.10876
AX-147218409	A03	130991357	1.17232				AX-147220708	A04	110684871	3.27917				AX-147225805	A06	91658393	1.91102				AX-147253944	A06	107413089	0.131522
AX-147218439	A03	131460394	1.09312				AX-176812660	A04	111718457	2.81098				AX-176798419	A06	92280811	2.23987				AX-147226446	A06	107413443	0.153378
AX-147218442	A03	131479751	1.08996				AX-147220775	A04	112403290	3.09086				AX-176796367	A06	94129577	1.90837				AX-176799154	A06	108736195	0.0353827
AX-147218446	A03	131522694	1.08369				AX-147248335	A04	112468907	3.06052				AX-176808608	A06	97062653	1.90833				AX-176800832	A06	109385384	1.00491
AX-147218483	A03	131858812	1.06509				AX-147220802	A04	112877017	3.1159				AX-147225934	A06	97902979	1.90834				AX-147226687	A06	110550534	0.108599
AX-176793476	A03	132068349	0.791415				AX-147248386	A04	113653210	3.95824	***			AX-147225935	A06	97904366	1.90834				AX-147226692	A06	110634476	0.124976
AX-147218506	A03	132428208	1.21423				AX-147220883	A04	114359220	2.68996				AX-147225977	A06	98751250	1.90833				AX-147254213	A06	110636015	0.124976
AX-176820083	A03	132658592	1.74485				AX-176820963	A04	115830024	2.96741				AX-147225997	A06	99250062	1.90834				AX-176811381	A06	110707714	0.124976
AX-147218617	A03	133464199	1.52461				AX-147221205	A04	119691567	0.749243				AX-147226002	A06	99493705	1.90834				AX-147254224	A06	110755932	0.125331
AX-147218728	A03	134516054	1.46909				AX-176791878	A04	120555571	1.04065				AX-176802106	A06	99772542	1.92461				AX-147254235	A06	110815427	0.124976
AX-147218741	A03	134818517	1.2111				AX-176815295	A04	120669932	0.841036				AX-147226037	A06	100317242	2.31034				AX-147226719	A06	110816722	0.124985
							AX-176820308	A04	120783536	0.306028				AX-147226076	A06	101146798	2.35914				AX-147226720	A06	110820404	0.12501
AX-147218747	A04	105953	0.383856				AX-147221342	A04	121133496	0.159187				AX-147226086	A06	101300979	2.35914				AX-147226730	A06	110905105	0.124976
AX-147218752	A04	162912	0.385019				AX-147221410	A04	122540803	1.08056				AX-147226154	A06	102679941	2.45899				AX-176805754	A06	110975358	0.124977
AX-147218758	A04	186370	0.384397											AX-147226157	A06	102694392	2.441				AX-147226816	A06	112388824	0.345225
AX-147246426	A04	376077	0.476296				AX-147221634	A05	6930207	2.29957				AX-147226178	A06	103181434	2.45948				AX-147226820	A06	112447942	0.345226
AX-147218852	A04	841579	0.985263				AX-147221653	A05	7294750	2.30746				AX-147226189	A06	103342388	2.45948
AX-147218905	A04	1330996	1.31192				AX-147249099	A05	7391321	0.82194				AX-176821210	A06	104836791	2.54861				AX-176820766	A10	7984682	0.0772711
AX-147218913	A04	1362368	1.31227				AX-147221675	A05	7804927	1.00903				AX-147253814	A06	105027171	2.45922				AX-176796506	A10	18066033	1.385
AX-147218916	A04	1428407	1.4226				AX-147221688	A05	7958564	2.29954				AX-147226288	A06	105029082	2.45948				AX-147241244	A10	57142266	1.41726
AX-147218960	A04	1903375	0.987508				AX-147221702	A05	8422937	2.29926				AX-147226305	A06	105157006	2.34728				AX-176795549	A10	95250338	0.354575
AX-147218990	A04	2341583	0.906387				AX-147221713	A05	8621849	2.29852				AX-147226332	A06	105470812	2.45946
AX-147219040	A04	2755924	1.23741				AX-147223282	A05	93958482	0.27702				AX-176817780	A06	106951673	2.37068				AX-147237421	B01	324682	0.8349
AX-147219071	A04	2986913	1.80177				AX-176814728	A05	97045943	0.368365				AX-147253944	A06	107413089	2.40161				AX-147237432	B01	525042	0.868647
AX-147219075	A04	3019208	1.79895				AX-147250292	A05	100941646	1.58585				AX-147226446	A06	107413443	2.40157				AX-147237458	B01	769119	0.756845
AX-147219127	A04	3517899	4.07304	***										AX-176799154	A06	108736195	1.96094				AX-147237465	B01	896297	0.756839
AX-147219138	A04	3712941	4.43471	***			AX-147224270	A06	2747003	0.980731				AX-176800832	A06	109385384	2.78851				AX-147209810	B01	1128855	0.643516
AX-147246852	A04	4182894	4.42333	***			AX-147224280	A06	2863952	0.975454				AX-147226687	A06	110550534	2.40872				AX-147237495	B01	1220452	0.64679
AX-147219161	A04	4216107	4.38245	***			AX-176816233	A06	2915219	0.978812				AX-147226692	A06	110634476	2.40883				AX-147209678	B01	1431059	0.703444
AX-147219235	A04	5659551	4.84316	****			AX-147224316	A06	3474367	0.677513				AX-147254213	A06	110636015	2.40883				AX-147237529	B01	1453243	0.69912
AX-147219264	A04	6680088	5.15496	****			AX-147224370	A06	4261015	0.754473				AX-176811381	A06	110707714	2.07944				AX-147237587	B01	2102983	0.611141
AX-147219321	A04	7370876	5.64543	****			AX-147224372	A06	4280783	0.755503				AX-147254224	A06	110755932	2.07893				AX-147224970	B01	27441886	0.0253652
AX-147219466	A04	10403187	6.43591	****			AX-147224420	A06	4687980	1.11823				AX-147254235	A06	110815427	2.07941				AX-147238820	B01	116043545	0.519501
AX-147219503	A04	12230276	6.25972	****			AX-147224485	A06	5405523	1.07662				AX-147226719	A06	110816722	2.07941				AX-176791457	B01	116719216	0.5195
AX-147219517	A04	12779729	5.46324	****			AX-147224487	A06	5411401	1.07761				AX-147226720	A06	110820404	2.07941				AX-176802580	B01	117112930	0.510149
AX-147219535	A04	13743326	5.77583	****			AX-147224507	A06	5789236	0.991175				AX-147226730	A06	110905105	2.07941				AX-176819387	B01	121368506	0.228637
AX-176817088	A04	15704111	8.87731	****			AX-147224542	A06	6374094	0.65649				AX-176805754	A06	110975358	2.07941				AX-147238924	B01	121642962	0.501398
AX-176794358	A04	18231560	10.8566	****			AX-147224620	A06	7334057	0.776744				AX-147226816	A06	112388824	2.16935
AX-147219646	A04	18406467	9.47252	****			AX-147224636	A06	7672324	0.801769				AX-147226820	A06	112447942	2.16935
AX-147219761	A04	26018057	9.81298	****			AX-147224664	A06	8149649	0.805738											AX-176801528	B03	22308023	0.179451
AX-176819555	A04	29697050	9.40933	****			AX-147224737	A06	9574526	1.14645				AX-147232553	A09	6846409	0.971232				AX-176796172	B03	22308147	0.179454
AX-176794649	A04	29697085	9.40999	****			AX-147224808	A06	10688288	0.680956				AX-147260196	A09	8267184	1.99137				AX-176805906	B03	22308199	0.179442
AX-147219833	A04	31201580	10.1655	****			AX-147224896	A06	11846893	1.97132				AX-147232661	A09	8661916	1.98898				AX-176809312	B03	22308225	0.179386
AX-147219969	A04	43910476	10.485	****			AX-147224945	A06	12964569	0.571234				AX-176791761	A09	12546411	0.923157				AX-176791476	B03	135810780	1.31182
AX-147247611	A04	46297588	11.0803	****			AX-176801863	A06	14539952	0.771715				AX-176797333	A09	20677308	2.67148				AX-147246324	B03	135984987	1.31182
AX-147220040	A04	53185121	9.67849	****			AX-147225078	A06	15715130	0.571618				AX-177639401	A09	93135689	0.488688
AX-147220067	A04	61632456	10.4714	****			AX-176819641	A06	16065445	0.556171				AX-147233670	A09	94328792	0.463547
AX-147220074	A04	62753825	9.66481	****			AX-147225104	A06	16428344	0.598698				AX-176822101	A09	97879279	0.201689				AX-147251793	B06	3620645	0.753992
AX-176794277	A04	71833835	10.5789	****			AX-147225232	A06	20970182	0.571823				AX-147233736	A09	100203544	0.52431				AX-147251810	B06	3917236	0.884606
AX-176801614	A04	72118706	10.6896	****			AX-147225325	A06	32572657	0.572074				AX-147233752	A09	100681800	0.469112				AX-147252038	B06	7484274	0.582082
AX-147220154	A04	76565873	10.353	****			AX-147225334	A06	34826404	0.615289				AX-177637511	A09	104608380	0.571509				AX-147252098	B06	9318095	0.449925
AX-147220197	A04	80024591	10.3136	****			AX-176802937	A06	35694283	2.32104				AX-147233881	A09	104624029	0.542315				AX-147252228	B06	12281786	0.497813
AX-147220250	A04	85249177	10.079	****			AX-177638959	A06	41229012	1.16318				AX-177640140	A09	106100105	0.0977951				AX-147252267	B06	13163062	0.575116
AX-147220275	A04	88047543	9.77531	****			AX-176808798	A06	51690304	0.315149				AX-147233963	A09	108905759	0.463541				AX-147252287	B06	13633699	0.455737
AX-147220290	A04	89924581	9.97109	****			AX-147225368	A06	52572560	0.572182				AX-147233992	A09	109699138	0.463545				AX-177640081	B06	13651322	0.161545
AX-176817223	A04	91804337	9.67922	****			AX-147225443	A06	66423228	0.57109				AX-147234017	A09	109977568	0.463558				AX-147252289	B06	13664789	0.162211
AX-176813726	A04	92635030	9.68366	****			AX-176795818	A06	69243064	0.589454				AX-147234159	A09	111972500	1.40102				AX-147252306	B06	13957090	0.58297
AX-147220329	A04	92696031	9.68367	****			AX-176796576	A06	69243068	0.589454				AX-147234195	A09	112245541	1.42269				AX-147252314	B06	14176970	0.590889
AX-176819415	A04	95000363	9.21741	****			AX-147225464	A06	69465627	0.631101				AX-176821396	A09	112528532	1.45926				AX-147252329	B06	14374420	0.593707
AX-176800379	A04	103831183	3.48768				AX-147225589	A06	79848717	0.865615				AX-147262369	A09	113662882	1.54281				AX-147252421	B06	16759789	0.5264
AX-147220481	A04	103964432	3.81505	***			AX-147225594	A06	79851479	0.692388				AX-176822907	A09	113714863	1.54366				AX-176795310	B06	22767474	0.44212
AX-147220500	A04	104172441	3.78581	***			AX-176817648	A06	79933722	0.961277				AX-147234336	A09	113715433	1.61682				AX-176791924	B06	24364654	0.206621
AX-176795032	A04	105034243	1.67123				AX-147225614	A06	80755197	1.23347				AX-147234385	A09	114515959	0.683625				AX-147252686	B06	27994454	0.289776
AX-176807803	A04	105896594	2.96062				AX-147225650	A06	82779126	0.572105				AX-176820496	A09	115524842	0.648532				AX-147252687	B06	27995343	0.290149
AX-147220633	A04	108230713	4.25165	***			AX-147225651	A06	82779734	0.572105				AX-147234542	A09	116087388	0.648547				AX-147252778	B06	35075298	0.0340515
AX-147220708	A04	110684871	4.73449	****			AX-147225660	A06	83182983	0.571322				AX-147262112	A09	116264687	0.735383				AX-147225299	B06	35557239	0.213353
AX-176812660	A04	111718457	5.38111	****			AX-176804988	A06	86798706	1.55299				AX-147234599	A09	116627090	0.769762				AX-176815586	B06	37850641	0.441704
AX-147220775	A04	112403290	5.4277	****			AX-147225805	A06	91658393	3.25997				AX-176792163	A09	116748829	0.79696				AX-176810808	B06	83007288	0.282721
AX-147248335	A04	112468907	5.89486	****			AX-176798419	A06	92280811	1.517				AX-147234740	A09	118577665	0.844916				AX-147252948	B06	87043539	0.334566
AX-147220802	A04	112877017	5.33479	****			AX-176798717	A06	93862557	2.40111				AX-147234752	A09	118682014	0.78726				AX-147252973	B06	89581718	0.459399
AX-147248386	A04	113653210	5.4449	****			AX-176796367	A06	94129577	1.87991											AX-176808576	B06	90816220	0.111352
AX-147220883	A04	114359220	5.01902	****			AX-176808608	A06	97062653	1.87214				AX-176820766	A10	7984682	0.0976932				AX-176817639	B06	96567520	0.394666
AX-176820963	A04	115830024	4.69268	****			AX-147225934	A06	97902979	1.6095				AX-176796506	A10	18066033	1.77863				AX-176815067	B06	96597652	0.244263
AX-147221103	A04	118778510	2.75101				AX-147225935	A06	97904366	1.60937				AX-176819152	A10	46982226	0.788867				AX-176791352	B06	103027033	0.468145
AX-147221205	A04	119691567	3.85082	***			AX-147225977	A06	98751250	1.67696				AX-176795549	A10	95250338	1.72395				AX-147253266	B06	115228228	0.198292
AX-176791878	A04	120555571	2.80342				AX-147225997	A06	99250062	1.47145				AX-147236856	A10	104674897	1.78185				AX-147253268	B06	115530806	0.205006
AX-176815295	A04	120669932	3.38168				AX-147226002	A06	99493705	1.55201											AX-147253390	B06	120283916	0.212788
AX-176820308	A04	120783536	2.38416				AX-176802106	A06	99772542	1.51867											AX-147253538	B06	124381466	0.449549
AX-147221342	A04	121133496	0.244386				AX-147226037	A06	100317242	1.12651				AX-147237421	B01	324682	2.61789				AX-147253545	B06	124476859	0.403818
AX-147221410	A04	122540803	0.351841				AX-147226076	A06	101146798	1.28756				AX-147237432	B01	525042	2.62727				AX-147253575	B06	124770106	0.040181
							AX-147226086	A06	101300979	1.3113				AX-147237458	B01	769119	2.61765				AX-147253713	B06	127612777	0.435674
AX-147221467	A05	1500438	1.14497				AX-147226154	A06	102679941	0.873171				AX-147237465	B01	896297	2.61765				AX-147253740	B06	128289653	0.510586
AX-147221510	A05	2776748	1.1449				AX-147226178	A06	103181434	1.02648				AX-147209810	B01	1128855	2.61765				AX-176817773	B06	128336903	0.384808
AX-147221511	A05	2859361	1.09996				AX-147226189	A06	103342388	0.999173				AX-147237495	B01	1220452	2.6218				AX-147253745	B06	128352895	0.293114
AX-147249011	A05	4294221	1.09986				AX-176821210	A06	104836791	0.871412				AX-147209678	B01	1431059	2.61765				AX-147253779	B06	128992668	0.343962
AX-147221560	A05	4536726	1.04842				AX-147253814	A06	105027171	0.841515				AX-147237529	B01	1453243	2.61765				AX-176820915	B06	129575475	0.505011
AX-176791991	A05	5435309	0.791794				AX-147226288	A06	105029082	0.843135				AX-147237587	B01	2102983	2.61764				AX-147253886	B06	130343046	0.643543
AX-147221577	A05	5669888	1.1189				AX-147226305	A06	105157006	0.844365				AX-176791872	B01	5672434	2.55342				AX-176792416	B06	132386862	0.235877
AX-147221580	A05	5802583	1.11144				AX-147226332	A06	105470812	1.20297				AX-147224970	B01	27441886	2.27228				AX-147254039	B06	133321816	0.0938806
AX-147221634	A05	6930207	1.11146				AX-176817780	A06	106951673	1.91894				AX-176808043	B01	47005832	2.72843				AX-147254041	B06	133323553	0.482554
AX-147221653	A05	7294750	1.11144				AX-147253944	A06	107413089	2.29116				AX-176815179	B01	65696288	0.0807792				AX-147254102	B06	133735471	0.494521
AX-147249099	A05	7391321	1.11106				AX-147226446	A06	107413443	0.724484				AX-147214594	B01	69167034	0.0603952				AX-147226599	B06	134109194	0.695096
AX-147221675	A05	7804927	1.11505				AX-176799154	A06	108736195	0.994596				AX-176808868	B01	113755738	0.110504				AX-147254191	B06	135004325	0.259572
AX-147221688	A05	7958564	1.11153				AX-176800832	A06	109385384	0.44207				AX-147238820	B01	116043545	2.61759				AX-147254198	B06	135080269	0.239621
AX-147221702	A05	8422937	1.07285				AX-176792875	A06	110532902	2.01819				AX-176791457	B01	116719216	2.64683				AX-147226735	B06	135770071	0.325821
AX-147221713	A05	8621849	1.11084				AX-147226687	A06	110550534	2.08399				AX-176802580	B01	117112930	2.61059				AX-176791829	B06	135783222	0.32582
							AX-147226692	A06	110634476	2.09525				AX-176819387	B01	121368506	1.09				AX-147226748	B06	135786569	0.325821
AX-147224270	A06	2747003	1.6593				AX-147254213	A06	110636015	2.09532				AX-147238924	B01	121642962	1.30243				AX-147226754	B06	135787388	0.325821
AX-147224280	A06	2863952	1.46963				AX-176811381	A06	110707714	2.52706											AX-147226756	B06	135787551	0.325821
AX-176816233	A06	2915219	1.52766				AX-147254224	A06	110755932	2.51665											AX-176815617	B06	135807278	0.327419
AX-147224316	A06	3474367	1.70559				AX-147254235	A06	110815427	2.05672				AX-176806565	B03	22307354	0.361857
AX-147224370	A06	4261015	1.61079				AX-147226719	A06	110816722	2.05674				AX-176801528	B03	22308023	0.370553
AX-147224372	A06	4280783	1.61223				AX-147226720	A06	110820404	2.05632				AX-176796172	B03	22308147	0.369466				AX-147259163	B08	121556595	2.18758
AX-147224420	A06	4687980	2.37307				AX-147226730	A06	110905105	2.05361				AX-176805906	B03	22308199	0.369526				AX-147259182	B08	122223999	2.20538
AX-147224485	A06	5405523	1.83343				AX-176805754	A06	110975358	2.05928				AX-176809312	B03	22308225	0.362059				AX-147259195	B08	122363848	2.20538
AX-147224487	A06	5411401	1.83466				AX-147226816	A06	112388824	2.02157				AX-176801202	B03	22308280	0.295595				AX-147259220	B08	122831418	2.20538
AX-147224507	A06	5789236	1.66822				AX-147226820	A06	112447942	1.82774				AX-176806119	B03	22308501	0.295582				AX-147259221	B08	122897408	2.20538
AX-147224542	A06	6374094	1.60643											AX-176811706	B03	35762650	2.77112				AX-147259300	B08	124336392	2.21854
AX-147224620	A06	7334057	1.41988				AX-147255148	A07	15218169	1.76901				AX-176814342	B03	106248333	0.000480482				AX-147259351	B08	125473859	2.63578
AX-147224636	A06	7672324	1.36918				AX-176806670	A07	17626380	2.97829				AX-147246147	B03	133020199	1.34135				AX-176792136	B08	125956737	2.5619
AX-147224664	A06	8149649	1.41776				AX-176812595	A07	17643601	2.29413				AX-147218491	B03	133159344	0.0445632
AX-147224737	A06	9574526	2.03992				AX-176800052	A07	17707397	1.90831				AX-176802986	B03	133487997	0.0439054
AX-147224808	A06	10688288	2.11421				AX-176808027	A07	17731546	1.90851				AX-147246176	B03	133622000	0.409627				AX-176791703	B10	9968629	0.0589347
AX-147224896	A06	11846893	1.61009				AX-176816873	A07	17754802	1.66867				AX-176791476	B03	135810780	2.9661	***			AX-147263446	B10	10717070	0.0101547
AX-147224945	A06	12964569	2.50212				AX-176804082	A07	17772008	1.66369				AX-147246324	B03	135984987	2.9661	***			AX-147263491	B10	11214359	0.00383676
AX-176801863	A06	14539952	1.86626				AX-176807727	A07	18169045	1.90996											AX-177639192	B10	11960833	0.0102683
AX-147225078	A06	15715130	2.05408				AX-176809163	A07	18169049	1.90996											AX-177644269	B10	13247245	0.0102622
AX-176819641	A06	16065445	2.24908				AX-176817824	A07	18174560	1.90996				AX-176815769	B05	40374124	1.21318				AX-176791776	B10	14052510	0.00129946
AX-147225104	A06	16428344	2.34582				AX-176820379	A07	18174579	1.90996				AX-147222478	B05	43415063	0.0792097				AX-177642573	B10	14149454	0.00878542
AX-147225232	A06	20970182	2.19777				AX-177640558	A07	18174822	1.90996				AX-176809590	B05	64545278	1.33016				AX-147263607	B10	15189329	0.00658455
AX-147225325	A06	32572657	1.92152				AX-176803839	A07	18174900	1.90996				AX-147222592	B05	73835105	0.0647853				AX-176820657	B10	17061918	0.0194666
AX-147225334	A06	34826404	1.88141				AX-176815878	A07	18175074	1.90996				AX-176821867	B05	93830809	1.2782				AX-177639228	B10	19663894	0.04898
AX-177638959	A06	41229012	3.20385				AX-176795094	A07	18175193	1.90996				AX-176812700	B05	95397826	1.45463				AX-147263769	B10	22491904	0.0933567
AX-176808798	A06	51690304	1.5443				AX-176794604	A07	18175255	1.90996				AX-147250202	B05	117310886	1.4553				AX-176799200	B10	23494035	0.0569623
AX-147225368	A06	52572560	1.98751				AX-176796760	A07	18175303	1.90996				AX-147250224	B05	118856272	1.4553				AX-176792092	B10	25381175	0.0987127
AX-147225443	A06	66423228	1.95648				AX-176797040	A07	18175313	1.90996				AX-147250318	B05	122956001	1.4553				AX-147263844	B10	27366049	0.0986755
AX-176795818	A06	69243064	1.01901				AX-176794420	A07	18175433	1.90996				AX-147250343	B05	123992671	1.45529				AX-147264063	B10	60634383	0.300216
AX-176796576	A06	69243068	1.01902				AX-176824167	A07	18175433	1.90996				AX-176800777	B05	125699812	1.26498				AX-147264064	B10	60634925	0.300578
AX-147225464	A06	69465627	2.10642				AX-177637220	A07	18175548	1.90996				AX-147250415	B05	126784749	1.3765				AX-176810036	B10	96793488	0.107224
AX-147225589	A06	79848717	1.73558				AX-176802048	A07	18175575	1.90996				AX-147250428	B05	127127435	1.37651				AX-147264208	B10	101217593	0.0990986
AX-147225594	A06	79851479	1.73519				AX-176796811	A07	18175653	1.90996				AX-147250483	B05	130306816	1.3765				AX-177637244	B10	102847093	0.0994083
AX-176817648	A06	79933722	1.63543				AX-176801360	A07	18175936	1.90996				AX-147250542	B05	132615089	1.3138				AX-147264223	B10	102975592	0.0281462
AX-147225614	A06	80755197	1.99464				AX-176808628	A07	18175967	1.90996				AX-147250555	B05	133272503	1.3765				AX-177638757	B10	106292220	0.0979926
AX-147225650	A06	82779126	1.99444				AX-176810637	A07	18176260	1.90996				AX-147250568	B05	133901493	1.37642				AX-147264328	B10	111150033	0.104584
AX-147225651	A06	82779734	1.99444				AX-176802210	A07	18176735	1.90996				AX-147250693	B05	137526639	1.37651				AX-147264395	B10	113584807	0.0676774
AX-147225660	A06	83182983	2.02268				AX-176809363	A07	18176770	1.90996				AX-176791873	B05	137560499	1.37651				AX-147264423	B10	115758393	0.0852533
AX-176804988	A06	86798706	1.56617				AX-177639758	A07	18176796	1.90996				AX-147250728	B05	138251806	1.37657				AX-147264424	B10	115759337	0.0854321
AX-147225805	A06	91658393	0.93276				AX-176807286	A07	18176872	1.67154				AX-176799661	B05	142429794	1.24052				AX-147264426	B10	115833661	0.124756
AX-176798419	A06	92280811	1.48404				AX-176800900	A07	18176883	1.67154				AX-147223970	B05	149108891	0.702482				AX-177639479	B10	116395569	0.124569
AX-176798717	A06	93862557	1.07221				AX-176800881	A07	18176920	1.67154				AX-147223971	B05	149112025	0.66395				AX-147264444	B10	116784871	0.0648738
AX-176796367	A06	94129577	3.33436				AX-176799773	A07	18176943	1.67154											AX-147264511	B10	118693317	0.086368
AX-176808608	A06	97062653	3.35189				AX-176801743	A07	18176946	1.67154				AX-147251793	B06	3620645	2.31035				AX-176791558	B10	119275183	0.455372
AX-147225934	A06	97902979	3.35186				AX-176800791	A07	18177083	1.76619				AX-147251810	B06	3917236	2.30692				AX-176791820	B10	123961122	0.000147165
AX-147225935	A06	97904366	3.35186				AX-176798667	A07	18177119	1.7662				AX-176794335	B06	7000834	0.861912				AX-147264750	B10	125927111	0.00499849
AX-147225977	A06	98751250	2.73662				AX-176797254	A07	18177448	1.87821				AX-147252038	B06	7484274	1.44439				AX-177639345	B10	126150964	0.00544472
AX-147225997	A06	99250062	3.35187				AX-176802515	A07	18177486	1.90996				AX-147252098	B06	9318095	2.21545				AX-147264825	B10	128125458	0.014237
AX-147226002	A06	99493705	3.35189				AX-177638153	A07	18177497	1.90996				AX-147252228	B06	12281786	2.18414				AX-176791475	B10	129422452	0.0183352
AX-176802106	A06	99772542	3.35189				AX-176807804	A07	18177556	1.90996				AX-147252267	B06	13163062	1.91314				AX-147264913	B10	130237287	0.160084
AX-147226037	A06	100317242	3.21285				AX-176796200	A07	18177607	1.90996				AX-147252287	B06	13633699	1.90834				AX-147264945	B10	130799987	0.438672
AX-147226076	A06	101146798	3.36323				AX-176813375	A07	18177810	1.90996				AX-177640081	B06	13651322	1.77852				AX-147265042	B10	131806031	0.625823
AX-147226086	A06	101300979	3.36322				AX-176798213	A07	18177857	1.90996				AX-147252289	B06	13664789	1.75062				AX-176791882	B10	131908361	0.441752
AX-147226154	A06	102679941	2.94023				AX-176792710	A07	18178284	1.90996				AX-147252306	B06	13957090	1.90969				AX-177642086	B10	133289435	0.860288
AX-147226178	A06	103181434	2.7608				AX-177638186	A07	18178505	1.90996				AX-147252314	B06	14176970	1.9107				AX-176791643	B10	133449357	1.06507
AX-147226189	A06	103342388	2.83256				AX-176798930	A07	18178701	1.90996				AX-147252329	B06	14374420	1.9116				AX-147265254	B10	133759254	0.947964
AX-147253814	A06	105027171	2.51618				AX-176799137	A07	18178777	1.90996				AX-147252421	B06	16759789	1.91164				AX-147265272	B10	133880109	0.892106
AX-147226288	A06	105029082	2.51619				AX-176809341	A07	18178904	1.90996				AX-176795310	B06	22767474	0.364307				AX-177643056	B10	133954862	0.884145
AX-147226305	A06	105157006	2.59612				AX-176802256	A07	18178939	1.90996				AX-176791924	B06	24364654	1.94983				AX-147265291	B10	133973530	0.863072
AX-147226332	A06	105470812	2.75298				AX-176801381	A07	18178972	1.90996				AX-147252686	B06	27994454	1.95007				AX-147265307	B10	134076186	0.650586
AX-176817780	A06	106951673	2.61827				AX-176801587	A07	18179068	1.90996				AX-147252687	B06	27995343	1.95007				AX-147265486	B10	135303526	1.76325
AX-147253944	A06	107413089	3.29821				AX-176794665	A07	18179069	1.90996				AX-147252778	B06	35075298	2.41165				AX-147265500	B10	135518938	1.74219
AX-147226446	A06	107413443	3.29904				AX-176798775	A07	18179075	1.90996				AX-147225299	B06	35557239	2.49379				AX-147265510	B10	135552827	1.9244
AX-176799154	A06	108736195	2.11512				AX-176814859	A07	18179077	1.90996				AX-176815586	B06	37850641	1.81001				AX-177639120	B10	135713446	1.92141
AX-176800832	A06	109385384	4.37778	***			AX-176806596	A07	18179140	1.90996				AX-147252948	B06	87043539	1.86782				AX-147237311	B10	135771077	2.07294
AX-176792875	A06	110532902	2.42909				AX-176801193	A07	18179160	1.90996				AX-147252973	B06	89581718	1.90843				AX-147265545	B10	135808237	2.20818
AX-147226687	A06	110550534	2.93933				AX-176799558	A07	18179163	1.90996				AX-176808576	B06	90816220	1.30972
AX-147226692	A06	110634476	2.93961				AX-176812902	A07	18179461	1.90996				AX-176817639	B06	96567520	1.91741
AX-147254213	A06	110636015	2.94024				AX-176823773	A07	18179526	1.90996				AX-176815067	B06	96597652	2.0031
AX-176811381	A06	110707714	2.94271				AX-176811945	A07	18180024	1.90996				AX-176791352	B06	103027033	1.94492
AX-147254224	A06	110755932	2.93756				AX-176812952	A07	18180236	1.90996				AX-147253266	B06	115228228	1.95006
AX-147254235	A06	110815427	2.94024				AX-177638835	A07	18180239	1.90996				AX-147253268	B06	115530806	1.94775
AX-147226719	A06	110816722	2.94024				AX-177638848	A07	18180316	1.90995				AX-147253390	B06	120283916	1.90835
AX-147226720	A06	110820404	2.94024				AX-176793162	A07	18180358	1.90995				AX-147253538	B06	124381466	1.99249
AX-147226730	A06	110905105	2.94024				AX-176817339	A07	18180594	1.67101				AX-147253545	B06	124476859	1.99249
AX-176805754	A06	110975358	2.94022				AX-176805557	A07	18180877	1.66732				AX-147253575	B06	124770106	2.43605
AX-147226816	A06	112388824	0.189384				AX-176802411	A07	24823307	0.584725				AX-147253713	B06	127612777	2.03556
AX-147226820	A06	112447942	0.225672				AX-176801245	A07	26175719	0.0485878				AX-147253740	B06	128289653	2.03548
							AX-177639461	A07	26203823	0.017381				AX-176817773	B06	128336903	2.03263
AX-147226911	A07	1125060	1.96502				AX-176800926	A07	26204759	0.0173283				AX-147253745	B06	128352895	2.47548
AX-177639366	A07	1207098	0.492208				AX-177638571	A07	26329688	0.0399828				AX-147253779	B06	128992668	2.49578
AX-147226980	A07	1715115	1.38995				AX-176817852	A07	28340516	0.136984				AX-176820915	B06	129575475	1.22438
AX-147254503	A07	2502673	0.528161				AX-177642025	A07	34314337	2.29934				AX-147253886	B06	130343046	2.03797
AX-147227276	A07	4359598	0.192322				AX-147228270	A07	38770197	2.0475				AX-147254039	B06	133321816	2.60642
AX-147227304	A07	4510195	0.270985				AX-176807964	A07	40722763	0.586567				AX-147254041	B06	133323553	2.61752
AX-147227318	A07	4560066	0.280497				AX-176797490	A07	40785641	0.98103				AX-147254102	B06	133735471	2.61765
AX-147254707	A07	4808653	1.28738				AX-147228382	A07	49949867	2.29269				AX-147226599	B06	134109194	2.61764
AX-147227380	A07	5325989	0.325927				AX-177643396	A07	53903274	0.103796				AX-147254191	B06	135004325	2.60646
AX-147227390	A07	5364934	0.356497				AX-177640670	A07	53985964	0.04545				AX-147254198	B06	135080269	2.49687
AX-147227391	A07	5372319	0.356497				AX-147258677	A07	53986127	0.0469633				AX-147226735	B06	135770071	2.61765
AX-147227409	A07	5513063	0.356497				AX-147228550	A07	60064185	2.29941				AX-176791829	B06	135783222	2.61765
AX-147227518	A07	6901139	0.373641				AX-147228566	A07	61354243	2.29943				AX-147226748	B06	135786569	2.61765
AX-147227580	A07	8218053	0.155313				AX-147228576	A07	62398239	2.29942				AX-147226754	B06	135787388	2.61765
AX-147227606	A07	8855622	0.0363031				AX-147228586	A07	63674899	2.29942				AX-147226756	B06	135787551	2.61765
AX-176803178	A07	9729090	0.0931581				AX-147228590	A07	64213755	2.18488				AX-176815617	B06	135807278	2.61744
AX-147227676	A07	10930537	0.093132				AX-176820084	A07	64335562	2.29939
AX-177641923	A07	14225134	0.750538				AX-147228634	A07	65957786	2.29943
AX-147227821	A07	14699755	0.170812				AX-147228658	A07	67162381	2.29916
AX-147227833	A07	14860287	1.45486				AX-147228738	A07	69596041	2.29943				AX-176791822	B07	2671333	3.09349	***
AX-147227834	A07	14860341	1.45486				AX-147228759	A07	70123570	2.27396				AX-147227165	B07	3073847	3.09349	***
AX-147227840	A07	15199143	1.32028				AX-147256944	A07	71736391	1.55084				AX-147254570	B07	3080948	3.09349	***
AX-147255148	A07	15218169	1.42723				AX-147228852	A07	72094208	1.19395				AX-147254586	B07	3309551	3.21058	***
AX-147227917	A07	17133488	1.42446											AX-147254636	B07	3941261	3.09347	***
AX-147227919	A07	17218154	1.39214				AX-177639401	A09	93135689	0.836135				AX-147254688	B07	4382301	2.94599	***
AX-176791685	A07	17302902	1.38587				AX-147233670	A09	94328792	0.648692				AX-147254706	B07	4673512	2.96612	***
AX-176806670	A07	17626380	3.72918				AX-176822101	A09	97879279	0.199406				AX-147254725	B07	5155467	2.96612	***
AX-176812595	A07	17643601	4.58952	****			AX-147233736	A09	100203544	0.00388728				AX-147254792	B07	5966992	2.96612	***
AX-176800052	A07	17707397	1.3356				AX-147233752	A09	100681800	0.54832				AX-147254826	B07	6386807	2.96612	***
AX-176808027	A07	17731546	1.2829				AX-147233881	A09	104624029	0.54844				AX-147254849	B07	6688891	2.96612	***
AX-177638437	A07	17731627	1.2829				AX-177640140	A09	106100105	0.124498				AX-147254864	B07	7278391	2.96613	***
AX-176803585	A07	17750686	1.2829				AX-147233961	A09	108869870	0.61747				AX-147254891	B07	8538334	3.1593	***
AX-176816873	A07	17754802	1.2829				AX-147233963	A09	108905759	0.548336				AX-147255209	B07	18647940	3.36861	***
AX-147227930	A07	17768688	1.2829				AX-147233992	A09	109699138	0.548376				AX-176823337	B07	19639295	3.36861	***
AX-176804082	A07	17772008	1.2829				AX-147234017	A09	109977568	0.548395				AX-177640563	B07	22555654	3.36861	***
AX-176807727	A07	18169045	1.2829				AX-147234159	A09	111972500	1.17039				AX-147255407	B07	27113953	3.36864	***
AX-176809163	A07	18169049	1.2829				AX-147234195	A09	112245541	1.15485				AX-147255421	B07	27860283	3.36863	***
AX-176817824	A07	18174560	1.2829				AX-176821396	A09	112528532	0.858515				AX-177637996	B07	28573469	2.52883
AX-176820379	A07	18174579	1.2829				AX-147262369	A09	113662882	0.913688				AX-176791431	B07	31648456	2.85357	***
AX-177640558	A07	18174822	1.2829				AX-176822907	A09	113714863	0.90529				AX-147255541	B07	33022904	3.3686	***
AX-176803839	A07	18174900	1.2829				AX-147234336	A09	113715433	0.958956				AX-176791990	B07	36741839	3.29705	***
AX-176815878	A07	18175074	1.2829				AX-147234385	A09	114515959	1.13253				AX-147255657	B07	40161223	3.29705	***
AX-176795094	A07	18175193	1.2829				AX-176820496	A09	115524842	0.997588				AX-177638127	B07	98978807	3.29705	***
AX-176794604	A07	18175255	1.2829				AX-147234542	A09	116087388	1.44225				AX-177641518	B07	104036917	3.29706	***
AX-176796760	A07	18175303	1.2829				AX-147262112	A09	116264687	1.82607				AX-147256076	B07	105566627	3.35008	***
AX-176797040	A07	18175313	1.2829				AX-147234599	A09	116627090	1.68575				AX-176821297	B07	105872336	3.35006	***
AX-176794420	A07	18175433	1.2829				AX-176792163	A09	116748829	1.68575				AX-147256109	B07	106774615	3.29705	***
AX-176824167	A07	18175433	1.2829				AX-147234740	A09	118577665	2.19778				AX-176793978	B07	106851423	3.29705	***
AX-177637220	A07	18175548	1.2829				AX-147234752	A09	118682014	2.19803				AX-176804480	B07	106851536	3.29705	***
AX-176802048	A07	18175575	1.28292											AX-176814221	B07	106851564	3.29705	***
AX-176796811	A07	18175653	1.38025				AX-147234866	A10	373630	4.66098	****			AX-176806568	B07	113297618	2.94733	***
AX-176801360	A07	18175936	1.54662				AX-177644206	A10	980256	1.69866				AX-147256330	B07	114323477	3.29706	***
AX-176808628	A07	18175967	1.54663				AX-176820766	A10	7984682	0.378638				AX-147256340	B07	114490353	3.29706	***
AX-176810637	A07	18176260	1.54663				AX-176803305	A10	12933326	0.44152				AX-176812607	B07	115507678	3.70889	****
AX-176802210	A07	18176735	1.54663				AX-176796506	A10	18066033	0.484421				AX-147256405	B07	116350309	3.70869	****
AX-176809363	A07	18176770	1.54663				AX-147241244	A10	57142266	0.450855				AX-147256413	B07	116532475	3.29709	***
AX-177639758	A07	18176796	1.54663				AX-176799737	A10	66576435	4.28589	***			AX-147256449	B07	117675646	3.29705	***
AX-176807286	A07	18176872	1.45244				AX-147236042	A10	67377100	0.599517
AX-176800900	A07	18176883	1.45243				AX-176795549	A10	95250338	0.0125729
AX-176800881	A07	18176920	1.28292				AX-176813315	A10	98891152	1.90994				AX-177643426	B08	5678750	1.90836
AX-176799773	A07	18176943	1.28291				AX-147236856	A10	104674897	1.90995				AX-176819410	B08	15974491	1.87626
AX-176801743	A07	18176946	1.28291											AX-176809193	B08	15979205	0.91651
AX-176800791	A07	18177083	1.28291				AX-147237421	B01	324682	1.62994				AX-147257868	B08	19625060	1.18615
AX-176798667	A07	18177119	1.28325				AX-147237432	B01	525042	0.455944				AX-176801089	B08	28002434	2.30907
AX-176797254	A07	18177448	1.28325				AX-147237458	B01	769119	0.0211701				AX-177641506	B08	31741859	2.79848	***
AX-176802515	A07	18177486	1.28325				AX-147237465	B01	896297	0.0215687				AX-176808178	B08	36833226	0.250394
AX-177638153	A07	18177497	1.2829				AX-147209810	B01	1128855	0.0442246				AX-176796159	B08	36833230	0.250394
AX-176807804	A07	18177556	1.2829				AX-147237495	B01	1220452	0.0479259				AX-176815070	B08	36839576	0.250394
AX-176796200	A07	18177607	1.2829				AX-147209678	B01	1431059	0.0386065				AX-177644132	B08	109905939	1.68252
AX-176813375	A07	18177810	1.2829				AX-147237529	B01	1453243	0.037952				AX-147259163	B08	121556595	1.35148
AX-176798213	A07	18177857	1.2829				AX-147237587	B01	2102983	2.24245				AX-147259182	B08	122223999	1.35155
AX-176792710	A07	18178284	1.2829				AX-147208994	B01	3439024	1.53869				AX-147259195	B08	122363848	1.4537
AX-177638186	A07	18178505	1.2829				AX-147208955	B01	3624699	1.53865				AX-147259220	B08	122831418	1.45373
AX-176798930	A07	18178701	1.2829				AX-147237696	B01	3963695	1.53684				AX-147259221	B08	122897408	1.45373
AX-176799137	A07	18178777	1.321				AX-176791972	B01	3991793	1.53864				AX-147259300	B08	124336392	1.45372
AX-176809341	A07	18178904	1.321				AX-176791872	B01	5672434	1.0259				AX-147259351	B08	125473859	1.47815
AX-176802256	A07	18178939	1.32334				AX-147237828	B01	6337719	1.3058				AX-176792136	B08	125956737	1.45373
AX-176801381	A07	18178972	1.32334				AX-147237868	B01	7216931	1.32325				AX-147259480	B08	128158193	0.0622584
AX-176801587	A07	18179068	1.32334				AX-147237874	B01	7369157	1.25631				AX-147259486	B08	128211868	0.0626978
AX-176794665	A07	18179069	1.32334				AX-176791994	B01	9391666	1.73482				AX-147259496	B08	128323260	0.0603789
AX-176798775	A07	18179075	1.30051				AX-176810775	B01	11960963	0.0239683				AX-176792038	B08	128637022	0.0505123
AX-176814859	A07	18179077	1.30051				AX-147207903	B01	13030024	0.162341				AX-147259523	B08	128894510	0.0602842
AX-176806596	A07	18179140	1.29176				AX-176805872	B01	15994407	0.259123
AX-176801193	A07	18179160	1.29176				AX-147207638	B01	16825660	0.276076				AX-147259681	B09	1404687	1.36047
AX-176799558	A07	18179163	1.29176				AX-176819138	B01	17264472	0.682445				AX-147259684	B09	1418475	1.39827
AX-176812902	A07	18179461	1.29132				AX-176797559	B01	22199621	0.270911				AX-147259699	B09	1605429	1.39829
AX-176823773	A07	18179526	1.29132				AX-147238252	B01	24245922	0.351563				AX-147259703	B09	1619980	1.39829
AX-176811945	A07	18180024	1.29089				AX-147224970	B01	27441886	0.580532				AX-147259787	B09	2624818	1.39829
AX-176812952	A07	18180236	1.2906				AX-176809240	B01	32580976	0.2008				AX-147259791	B09	2719395	1.39829
AX-177638835	A07	18180239	1.2906				AX-176791759	B01	33166457	0.500595				AX-176791782	B09	2862787	1.39829
AX-177638848	A07	18180316	1.2867				AX-176823511	B01	33888690	0.562785				AX-147259838	B09	3508840	1.39829
AX-176793162	A07	18180358	1.28671				AX-176819865	B01	36538462	0.154414				AX-176791539	B09	3807796	1.38958
AX-176817339	A07	18180594	1.28671				AX-176813854	B01	41386088	0.048522				AX-147259886	B09	3956919	1.39623
AX-176805557	A07	18180877	1.2867				AX-176808043	B01	47005832	2.02592				AX-147259963	B09	5083710	1.39623
AX-177641377	A07	23406393	1.61535				AX-176795601	B01	52956625	0.182647				AX-147260194	B09	10135479	1.40671
AX-147228073	A07	23988146	1.6721				AX-176815179	B01	65696288	0.713927				AX-147260211	B09	10376197	1.40672
AX-176802411	A07	24823307	6.2176	****			AX-147214594	B01	69167034	0.81998				AX-147260230	B09	10719853	1.40674
AX-176801245	A07	26175719	1.5723				AX-176808868	B01	113755738	0.779433				AX-147260234	B09	10801176	1.49333
AX-177639461	A07	26203823	1.58914				AX-147238796	B01	114749669	0.743137				AX-176791960	B09	12385370	0.05267
AX-176800926	A07	26204759	1.58914				AX-147238820	B01	116043545	1.17878
AX-177638571	A07	26329688	1.58911				AX-176791457	B01	116719216	1.27103				AX-176791703	B10	9968629	1.31826
AX-147228146	A07	28320911	1.71361				AX-176802580	B01	117112930	1.03568				AX-147263446	B10	10717070	1.31826
AX-176817852	A07	28340516	1.42043				AX-147238924	B01	121642962	1.1591				AX-147263491	B10	11214359	1.31826
AX-176815251	A07	29037518	1.5301				AX-147238948	B01	122737994	0.618585				AX-177639192	B10	11960833	1.3449
AX-177642025	A07	34314337	1.37397				AX-147239005	B01	124135621	0.620388				AX-177644269	B10	13247245	1.31826
AX-147228199	A07	34519088	0.615144				AX-176792079	B01	125661644	0.413615				AX-176791776	B10	14052510	1.31826
AX-147228270	A07	38770197	1.7144				AX-147239087	B01	126121763	0.483135				AX-177642573	B10	14149454	1.30795
AX-176807964	A07	40722763	1.81345				AX-147239097	B01	126275267	0.469434				AX-147263607	B10	15189329	1.31592
AX-176797490	A07	40785641	1.22404				AX-147239126	B01	127008022	0.327334				AX-176820657	B10	17061918	0.775714
AX-147228382	A07	49949867	1.59162				AX-147239132	B01	127063836	0.32617				AX-177639228	B10	19663894	1.28311
AX-177643396	A07	53903274	1.94599				AX-147239229	B01	129329429	0.235617				AX-147263769	B10	22491904	1.25289
AX-177640670	A07	53985964	1.58877				AX-147239236	B01	129357167	0.235615				AX-176799200	B10	23494035	0.809291
AX-147258677	A07	53986127	1.58876				AX-176791354	B01	129513514	0.20759				AX-176792092	B10	25381175	1.28355
AX-147228550	A07	60064185	1.823				AX-147239269	B01	129771687	0.528508				AX-147263844	B10	27366049	1.2532
AX-147228566	A07	61354243	1.71499				AX-147239280	B01	129882691	0.528514				AX-147264063	B10	60634383	0.0603788
AX-147228576	A07	62398239	1.71499				AX-147239347	B01	131386591	0.38658				AX-147264064	B10	60634925	0.0603788
AX-147228581	A07	63185572	1.13723				AX-147239423	B01	133926550	1.62438				AX-176810036	B10	96793488	1.41255
AX-147228586	A07	63674899	1.63228				AX-147239547	B01	135112455	0.323018				AX-147264208	B10	101217593	1.38585
AX-147228590	A07	64213755	1.38181				AX-176791498	B01	135222846	0.251613				AX-177637244	B10	102847093	1.41919
AX-176820084	A07	64335562	1.60001				AX-147239650	B01	136439457	2.81748				AX-177638757	B10	106292220	1.41919
AX-147228634	A07	65957786	1.63035				AX-147239660	B01	136506177	2.82585				AX-147264328	B10	111150033	1.36218
AX-147228658	A07	67162381	1.71057				AX-147239736	B01	137130556	0.781615				AX-147264395	B10	113584807	1.39448
AX-147228738	A07	69596041	0.748263											AX-147264426	B10	115833661	1.36146
AX-147228759	A07	70123570	1.38111				AX-176801528	B03	22308023	0.181336				AX-177639479	B10	116395569	1.38603
AX-147228785	A07	71124776	1.82747				AX-176796172	B03	22308147	0.0272743				AX-147264511	B10	118693317	1.35145
AX-147228791	A07	71387264	1.72695				AX-176805906	B03	22308199	0.0250088				AX-176791558	B10	119275183	1.21065
AX-147256944	A07	71736391	1.80042				AX-176809312	B03	22308225	0.0250088				AX-176791820	B10	123961122	2.45947
AX-147228852	A07	72094208	1.31026				AX-176801202	B03	22308280	0.0210375				AX-147264750	B10	125927111	2.45948
AX-177643823	A07	72679285	1.97219				AX-176816852	B03	26652687	1.97896				AX-177639345	B10	126150964	2.45948
AX-147228982	A07	74519999	2.52501				AX-176807784	B03	27434627	0.468968				AX-147264825	B10	128125458	2.45948
AX-176821410	A07	75852917	1.96894				AX-176807624	B03	34698486	2.54159				AX-176791475	B10	129422452	2.45946
AX-147229051	A07	76344679	1.96893				AX-176811706	B03	35762650	3.19809				AX-147264913	B10	130237287	2.45948
AX-177643546	A07	77607168	1.14323				AX-147244439	B03	36081439	2.91942				AX-147264945	B10	130799987	2.45949
							AX-147244469	B03	37156167	2.47511				AX-147265042	B10	131806031	2.61765
AX-177641745	A08	8857956	3.33084				AX-176815015	B03	38150429	0.710374				AX-176791882	B10	131908361	2.61765
AX-177642006	A08	29642173	0.829978				AX-176795550	B03	38150434	0.710374				AX-177642086	B10	133289435	2.61764
AX-176817973	A08	43472087	5.42614	****			AX-176816891	B03	38150784	0.710374				AX-176791643	B10	133449357	2.61764
							AX-147244572	B03	45132180	3.21378				AX-147265254	B10	133759254	2.61765
AX-147260196	A09	8267184	1.12497				AX-176814342	B03	106248333	0.485558				AX-147265272	B10	133880109	2.61765
AX-147232661	A09	8661916	1.65625				AX-147245171	B03	117848795	2.74513				AX-177643056	B10	133954862	2.61765
AX-147260629	A09	14150363	7.81887	****			AX-147245258	B03	120052892	2.666				AX-147265291	B10	133973530	2.61765
							AX-147245263	B03	120120121	2.74585				AX-147265307	B10	134076186	2.61765
AX-176820766	A10	7984682	4.71718	****			AX-176792179	B03	120236635	2.74586				AX-147265486	B10	135303526	2.61765
AX-176803305	A10	12933326	0.715153				AX-147245309	B03	121027376	2.74586				AX-147265500	B10	135518938	2.61765
AX-176796506	A10	18066033	2.58831				AX-147245336	B03	121303111	2.74587				AX-147265510	B10	135552827	2.61765
AX-176820028	A10	21109953	0.469758				AX-147245392	B03	122191218	2.68813				AX-177639120	B10	135713446	2.61765
AX-147241244	A10	57142266	5.28998	****			AX-147245394	B03	122239376	2.74578				AX-147237311	B10	135771077	2.61765
AX-176795549	A10	95250338	9.0344	****			AX-147245419	B03	122885412	2.27037				AX-147265545	B10	135808237	2.61765
							AX-176813056	B03	123605071	2.27034
AX-147237432	B01	525042	1.47455				AX-147245500	B03	124672923	2.27688
AX-147237458	B01	769119	1.63984				AX-147245502	B03	124680620	2.82523
AX-147237465	B01	896297	1.63984				AX-147245544	B03	125148566	2.82886
AX-147209810	B01	1128855	1.49338				AX-147245545	B03	125151253	2.32697
AX-147237495	B01	1220452	1.75414				AX-176791887	B03	126294568	2.27521
AX-147209678	B01	1431059	1.74912				AX-147245793	B03	1.28561e+08	2.67004
AX-147237529	B01	1453243	1.50275				AX-147245802	B03	1.28603e+08	2.64791
AX-147237587	B01	2102983	0.131549				AX-176791753	B03	128907556	2.27067
AX-147208994	B01	3439024	0.228601				AX-147218217	B03	1.29421e+08	2.27052
AX-147208955	B01	3624699	0.18791				AX-176791517	B03	129787316	2.78668
AX-147237696	B01	3963695	0.177415				AX-147245896	B03	1.29792e+08	2.79053
AX-176791972	B01	3991793	0.163244				AX-147245901	B03	1.29828e+08	2.73175
AX-176791872	B01	5672434	2.72737				AX-147245940	B03	130286855	2.91504
AX-147237828	B01	6337719	0.272164				AX-147245966	B03	1.30622e+08	2.75824
AX-147237868	B01	7216931	0.427007				AX-147218333	B03	130873990	2.43844
AX-147237874	B01	7369157	0.487652				AX-147246077	B03	1.32012e+08	2.82889
AX-176791994	B01	9391666	0.660507				AX-147246079	B03	1.32032e+08	2.82889
AX-147207903	B01	13030024	0.632547				AX-147246130	B03	132749247	2.6376
AX-147238071	B01	13582092	3.22791				AX-176804329	B03	132938538	2.67502
AX-176805872	B01	15994407	0.425909				AX-147246147	B03	1.3302e+08	2.56979
AX-147207638	B01	16825660	0.120683				AX-147218491	B03	133159344	3.29473
AX-176819138	B01	17264472	0.213838				AX-147246163	B03	1.33161e+08	3.29089
AX-176797559	B01	22199621	0.0550957				AX-176802986	B03	133487997	2.26566
AX-147238252	B01	24245922	0.142363				AX-147246176	B03	133622000	2.07438
AX-147224970	B01	27441886	0.884764				AX-176791415	B03	1.34089e+08	2.3601
AX-176809240	B01	32580976	0.250764				AX-147246215	B03	134096690	2.38564
AX-176791759	B01	33166457	0.169941				AX-176791476	B03	135810780	1.83462
AX-176823511	B01	33888690	0.114551				AX-147246324	B03	135984987	1.86935
AX-176819865	B01	36538462	0.223841
AX-176813854	B01	41386088	0.139877				AX-147221280	B04	130961045	5.45912	****
AX-176795601	B01	52956625	0.20774				AX-176799045	B04	130996008	4.9582	****
AX-176815179	B01	65696288	0.224724				AX-147248816	B04	131009789	4.92283	****
AX-147214594	B01	69167034	0.195232				AX-147221308	B04	131087339	5.45991	****
AX-176808868	B01	113755738	0.432539				AX-147221309	B04	131087434	5.45991	****
AX-147238796	B01	114749669	0.345205				AX-147221312	B04	131143480	5.45991	****
AX-147238820	B01	116043545	0.878219				AX-176798868	B04	131185893	5.4514	****
AX-176791457	B01	116719216	0.893933				AX-176795109	B04	131219792	5.45991	****
AX-176802580	B01	117112930	0.918267				AX-147248834	B04	131282663	5.4599	****
AX-147238924	B01	121642962	0.881744				AX-147221332	B04	131365278	5.45982	****
AX-147238948	B01	122737994	0.359965				AX-147221333	B04	131365849	5.45991	****
AX-147239005	B01	124135621	0.29166				AX-147221335	B04	131366514	5.45991	****
AX-176792079	B01	125661644	0.478301				AX-176791380	B04	131369085	5.45991	****
AX-147239087	B01	126121763	0.44499				AX-147221336	B04	131369776	5.45991	****
AX-147239097	B01	126275267	0.29738				AX-147221339	B04	131385626	5.45991	****
AX-147239126	B01	127008022	0.485439				AX-176814770	B04	131403164	5.45991	****
AX-147239132	B01	127063836	0.488919				AX-176822492	B04	131403739	5.4599	****
AX-147239229	B01	129329429	0.470264				AX-147221351	B04	131404006	5.38599	****
AX-147239236	B01	129357167	0.458416				AX-147248849	B04	131447872	5.38275	****
AX-176791354	B01	129513514	0.474834				AX-147248854	B04	131462529	5.45986	****
AX-147239269	B01	129771687	0.588534				AX-147248863	B04	131625171	5.4599	****
AX-147239280	B01	129882691	0.762059				AX-147248864	B04	131628381	5.45639	****
AX-147239347	B01	131386591	0.321255				AX-147248894	B04	132671610	5.45977	****
AX-147239400	B01	132569217	0.305052				AX-147248906	B04	133215432	5.45991	****
AX-147239423	B01	133926550	0.382964				AX-147248909	B04	133317694	5.45991	****
AX-147239547	B01	135112455	0.216953
AX-176791498	B01	135222846	0.148587				AX-176808166	B05	18651029	0.239163
AX-147239650	B01	136439457	0.344048				AX-147222145	B05	20375298	1.18666
AX-147239660	B01	136506177	0.32663				AX-176804524	B05	25508442	0.713107
AX-147239736	B01	137130556	0.498929				AX-176815769	B05	40374124	1.91219
							AX-176809590	B05	64545278	2.40434
AX-147239792	B02	262035	1.67986				AX-176821867	B05	93830809	1.28903
AX-147239806	B02	378957	1.57277				AX-176812700	B05	95397826	1.21193
AX-147239826	B02	463495	1.29909				AX-147250202	B05	117310886	1.40302
AX-147212492	B02	778642	1.29896				AX-147250224	B05	118856272	1.58482
AX-147239986	B02	1296859	1.71893				AX-176815565	B05	120888173	0.400855
AX-176819098	B02	1316076	1.71408				AX-147250318	B05	122956001	1.61185
AX-147240075	B02	1620220	5.11086	****			AX-147250343	B05	123992671	1.81019
AX-147240114	B02	1783128	5.17306	****			AX-176800777	B05	125699812	0.262345
AX-147240166	B02	1979905	5.00634	****			AX-147250415	B05	126784749	1.59645
AX-147240256	B02	2197152	4.99558	****			AX-147250428	B05	127127435	1.61173
AX-147240277	B02	2291623	4.91033	****			AX-147250483	B05	130306816	1.61096
AX-176792068	B02	2365066	3.12988				AX-147250542	B05	132615089	1.77241
AX-147240299	B02	2423971	3.14327				AX-147250555	B05	133272503	1.55206
AX-147240304	B02	2467872	4.93854	****			AX-147250568	B05	133901493	1.56236
AX-147212805	B02	2510172	5.00697	****			AX-147250693	B05	137526639	1.55201
AX-147240437	B02	4591623	1.27043				AX-176791873	B05	137560499	1.55201
AX-147240444	B02	4649921	1.27042				AX-147250728	B05	138251806	1.57783
AX-147240690	B02	7756210	1.34198				AX-176821307	B05	141474535	1.23502
AX-176791647	B02	7863983	1.38439				AX-176799661	B05	142429794	2.5098
AX-147240758	B02	9327175	2.12195				AX-147223816	B05	146590930	3.21471
AX-147240783	B02	10083831	4.34949	***			AX-147251343	B05	148444844	1.82479
AX-147240868	B02	12432351	3.35301				AX-147251390	B05	148892105	1.90163
AX-176816559	B02	13566985	3.54122				AX-147223970	B05	149108891	1.90564
AX-147240981	B02	16302789	3.40866				AX-147223971	B05	149112025	0.758832
AX-147240987	B02	16781198	3.35969
AX-176814069	B02	25034123	6.79081	****			AX-147251517	B06	252362	1.12935
AX-176810584	B02	73563415	13.5492	****			AX-147251572	B06	906068	2.18969
AX-147241656	B02	82436771	10.9218	****			AX-176815509	B06	1909409	1.86337
AX-176793794	B02	82582784	10.9499	****			AX-176821623	B06	2198106	0.806151
AX-147241677	B02	83660131	10.9217	****			AX-147251793	B06	3620645	2.41454
AX-147241682	B02	83956837	10.9217	****			AX-147251810	B06	3917236	0.679009
AX-147241702	B02	84802896	10.9216	****			AX-176794335	B06	7000834	0.0611119
AX-176816700	B02	85124123	9.56842	****			AX-147252038	B06	7484274	3.45979
AX-147241709	B02	85213180	8.94947	****			AX-147252098	B06	9318095	0.182611
AX-176816711	B02	88992967	2.65643				AX-147252228	B06	12281786	0.295798
AX-176800139	B02	90402608	0.878903				AX-147252267	B06	13163062	0.210969
AX-147241916	B02	91975066	6.97105	****			AX-147252287	B06	13633699	0.201893
AX-147242039	B02	94026024	10.9216	****			AX-177640081	B06	13651322	0.201933
AX-176791941	B02	94802544	10.9217	****			AX-147252289	B06	13664789	0.194803
AX-147242097	B02	94962649	10.9217	****			AX-147252306	B06	13957090	0.251588
AX-147242338	B02	100393173	6.55208	****			AX-147252314	B06	14176970	0.0684749
AX-147242383	B02	100940577	2.29424				AX-147252329	B06	14374420	0.0462775
AX-147242413	B02	101400907	1.80563				AX-147252421	B06	16759789	0.359402
AX-147242414	B02	101401524	1.80563				AX-176795310	B06	22767474	0.50149
AX-147242580	B02	103980876	0.331216				AX-176791924	B06	24364654	0.0471747
AX-176791392	B02	104833813	1.01555				AX-147252686	B06	27994454	0.0893507
AX-147242664	B02	104842996	0.753673				AX-147252687	B06	27995343	0.179121
AX-147242688	B02	105150391	0.753687				AX-147252778	B06	35075298	0.582814
AX-147242696	B02	105197496	0.754072				AX-147225299	B06	35557239	0.500881
AX-147242719	B02	105459475	0.86265				AX-176815586	B06	37850641	0.120664
AX-147242749	B02	105777210	0.943799				AX-176810808	B06	83007288	0.15484
AX-147242782	B02	106199533	1.03927				AX-147252948	B06	87043539	0.0469273
AX-147242790	B02	106275015	1.03928				AX-147252973	B06	89581718	0.101639
AX-147242801	B02	106519289	1.09272				AX-176808576	B06	90816220	0.915096
AX-147242807	B02	106733410	1.10787				AX-176817639	B06	96567520	0.327421
AX-147242840	B02	108129417	1.70565				AX-176815067	B06	96597652	0.276372
AX-147215246	B02	108210066	1.41724				AX-176791352	B06	103027033	0.0478045
							AX-147253266	B06	115228228	0.0035714
AX-147242994	B03	1844786	1.66333				AX-147253268	B06	115530806	0.180356
AX-147243021	B03	2002905	1.46207				AX-147253390	B06	120283916	0.102558
AX-147243043	B03	2173533	1.6327				AX-147253538	B06	124381466	0.319324
AX-147214870	B03	16566657	5.11086	****			AX-147253545	B06	124476859	0.314019
AX-176801528	B03	22308023	1.17848				AX-147253575	B06	124770106	1.3645
AX-176796172	B03	22308147	1.17848				AX-147253713	B06	127612777	0.302046
AX-176805906	B03	22308199	1.17847				AX-147253740	B06	128289653	0.319621
AX-176816852	B03	26652687	0.148686				AX-176817773	B06	128336903	0.830096
AX-176807784	B03	27434627	1.59496				AX-147253745	B06	1.28353e+08	0.800799
AX-176814342	B03	106248333	0.252256				AX-147253779	B06	128992668	0.332249
AX-147245171	B03	117848795	2.64962				AX-176820915	B06	129575475	0.334345
AX-147245258	B03	120052892	2.56886				AX-147253886	B06	130343046	0.213056
AX-147245263	B03	120120121	2.56864				AX-147254039	B06	133321816	0.0374633
AX-176792179	B03	120236635	2.22191				AX-147254041	B06	133323553	0.45003
AX-147245309	B03	121027376	2.27433				AX-147254102	B06	133735471	0.425759
AX-147245336	B03	121303111	2.2909				AX-147226599	B06	134109194	0.485781
AX-147245392	B03	122191218	1.96782				AX-147254191	B06	135004325	0.354722
AX-147245394	B03	122239376	1.97808				AX-147254198	B06	135080269	0.188398
AX-147245419	B03	122885412	2.26718				AX-147226735	B06	135770071	1.07178
AX-176813056	B03	123605071	1.47455				AX-176791829	B06	135783222	1.32286
AX-147218333	B03	130873990	0.319323				AX-147226748	B06	135786569	1.3714
AX-147246176	B03	133622000	1.88956				AX-147226754	B06	135787388	1.35156
AX-176791476	B03	135810780	1.46405				AX-147226756	B06	135787551	1.35156
AX-147246324	B03	135984987	1.4783				AX-176815617	B06	135807278	0.661175
AX-147221280	B04	130961045	1.06705
AX-176799045	B04	130996008	0.784065				AX-176791822	B07	2671333	2.18382
AX-147248816	B04	131009789	0.508783				AX-147227165	B07	3073847	2.09374
AX-147221308	B04	131087339	1.13134				AX-147254570	B07	3080948	2.09249
AX-147221309	B04	131087434	0.963798				AX-147254586	B07	3309551	3.44923
AX-147221312	B04	131143480	1.34317				AX-147254636	B07	3941261	3.1306
AX-176798868	B04	131185893	0.185064				AX-147254688	B07	4382301	3.0512
AX-176795109	B04	131219792	0.536226				AX-147254706	B07	4673512	3.02795
AX-147248834	B04	131282663	1.29596				AX-147254725	B07	5155467	3.07683
AX-147221332	B04	131365278	1.09455				AX-147254792	B07	5966992	3.15238
AX-147221333	B04	131365849	1.30572				AX-147254826	B07	6386807	3.15238
AX-147221335	B04	131366514	1.15848				AX-147254849	B07	6688891	3.23268
AX-176791380	B04	131369085	1.1754				AX-147254864	B07	7278391	3.45451
AX-147221336	B04	131369776	1.24544				AX-147254891	B07	8538334	3.77096	***
AX-147221339	B04	131385626	1.09466				AX-147255209	B07	18647940	2.55088
AX-176814770	B04	131403164	1.34784				AX-176823337	B07	19639295	2.58576
AX-176822492	B04	131403739	1.64255				AX-177640563	B07	22555654	0.168383
AX-147221351	B04	131404006	0.00979474				AX-176815482	B07	25617087	1.3294
AX-147248849	B04	131447872	0.0570334				AX-147255407	B07	27113953	2.68723
AX-147248854	B04	131462529	1.30804				AX-147255421	B07	27860283	2.68723
AX-147248863	B04	131625171	1.08271				AX-177637996	B07	28573469	1.3349
AX-147248864	B04	131628381	1.21985				AX-176791431	B07	31648456	2.76544
AX-147248894	B04	132671610	0.968462				AX-147255541	B07	33022904	2.81419
AX-147248906	B04	133215432	0.460245				AX-147255574	B07	35115883	2.82049
AX-147248909	B04	133317694	0.315909				AX-176791990	B07	36741839	2.80683
							AX-177638941	B07	39001094	2.78893
AX-176808166	B05	18651029	9.58185	****			AX-147255657	B07	40161223	4.29566	***
AX-176815769	B05	40374124	1.24025				AX-177638127	B07	98978807	4.33829	***
AX-147222478	B05	43415063	0.213138				AX-177641518	B07	104036917	4.2861	***
AX-176809590	B05	64545278	0.00258697				AX-147256076	B07	105566627	4.2923	***
AX-147222592	B05	73835105	0.65314				AX-176821297	B07	105872336	4.14995	***
AX-176821867	B05	93830809	1.137				AX-147256109	B07	106774615	4.29614	***
AX-176812700	B05	95397826	0.780967				AX-176793978	B07	106851423	4.29661	***
AX-147250202	B05	117310886	1.64148				AX-176804480	B07	106851536	4.29654	***
AX-147250224	B05	118856272	1.64151				AX-176814221	B07	106851564	4.29721	***
AX-147250318	B05	122956001	1.64151				AX-176806568	B07	113297618	4.08121	***
AX-147250343	B05	123992671	1.6415				AX-147256330	B07	114323477	4.28601	***
AX-176800777	B05	125699812	1.6415				AX-147256340	B07	114490353	4.2857	***
AX-147250415	B05	126784749	1.6415				AX-147256405	B07	116350309	3.48433
AX-147250428	B05	127127435	1.6415				AX-147256413	B07	116532475	3.47413
AX-147250483	B05	130306816	1.3686				AX-147256449	B07	117675646	3.50061
AX-147250542	B05	132615089	1.6415				AX-177640874	B07	118405970	2.70306
AX-147250555	B05	133272503	1.6415				AX-176817880	B07	120684461	0.84287
AX-147250568	B05	133901493	1.59542				AX-147256773	B07	124014849	1.95729
AX-147250693	B05	137526639	1.59117				AX-147256778	B07	124151442	2.33213
AX-176791873	B05	137560499	1.59117				AX-147256817	B07	124642564	2.25883
AX-147250728	B05	138251806	1.59117				AX-176791477	B07	124806514	2.27034
AX-176821307	B05	141474535	0.344184				AX-147256831	B07	124808289	2.27034
AX-147251343	B05	148444844	0.064724				AX-147256871	B07	125572052	1.89612
AX-147251390	B05	148892105	0.105226				AX-147256877	B07	125624042	1.89612
AX-147223970	B05	149108891	0.0826535				AX-147256898	B07	125925487	1.87186
AX-147223971	B05	149112025	0.0334469
AX-147251425	B05	149286498	0.474264
AX-147224039	B05	149672764	0.0786827				AX-147257262	B08	3465897	1.58368
							AX-176791821	B08	3524052	1.60714
AX-147251517	B06	252362	0.882243				AX-147257270	B08	3608931	1.60714
AX-147251572	B06	906068	0.301181				AX-176791743	B08	4769423	1.60711
AX-176815509	B06	1909409	0.301875				AX-177643426	B08	5678750	0.167982
AX-176821623	B06	2198106	0.215428				AX-147257458	B08	6300409	1.60714
AX-147251793	B06	3620645	0.734725				AX-147257470	B08	6406730	1.60714
AX-147251810	B06	3917236	0.573675				AX-147257484	B08	6642505	1.60714
AX-147252038	B06	7484274	0.531463				AX-177642834	B08	7259589	1.60714
AX-147252098	B06	9318095	3.75742	***			AX-147257516	B08	7439204	1.60719
AX-147252228	B06	12281786	3.99535	***			AX-176823225	B08	7798891	3.17472
AX-147252267	B06	13163062	3.7645	***			AX-147257729	B08	13636051	0.0194371
AX-147252287	B06	13633699	3.98465	***			AX-176806766	B08	15969665	0.0306959
AX-177640081	B06	13651322	4.01559	***			AX-176819410	B08	15974491	0.732944
AX-147252306	B06	13957090	3.99241	***			AX-176809193	B08	15979205	0.755101
AX-147252314	B06	14176970	3.99069	***			AX-176807298	B08	16126958	0.197089
AX-147252329	B06	14374420	3.99364	***			AX-147257828	B08	17906817	0.196874
AX-147252421	B06	16759789	4.00192	***			AX-147257868	B08	19625060	1.03425
AX-176795310	B06	22767474	5.78283	****			AX-147257934	B08	21828533	0.624686
AX-176791924	B06	24364654	4.03256	***			AX-147257993	B08	23833277	0.00645871
AX-147252686	B06	27994454	3.98587	***			AX-177640112	B08	25534918	0.025583
AX-147252687	B06	27995343	4.04662	***			AX-147258047	B08	26013615	0.00740043
AX-147252778	B06	35075298	1.7258				AX-176801089	B08	28002434	0.405977
AX-147225299	B06	35557239	0.685374				AX-177641883	B08	28490879	0.0416858
AX-176810808	B06	83007288	3.69254				AX-176804099	B08	28852312	0.0423753
AX-147252948	B06	87043539	2.89201				AX-176793999	B08	29255254	0.143633
AX-147252973	B06	89581718	3.79485	***			AX-176805513	B08	29255307	0.143633
AX-176808576	B06	90816220	3.16808				AX-176808255	B08	29255497	0.143595
AX-176817639	B06	96567520	3.03154				AX-176815701	B08	29255521	0.143595
AX-176815067	B06	96597652	3.2128				AX-176814820	B08	30041320	0.042164
AX-176791352	B06	103027033	3.93563	***			AX-177641506	B08	31741859	3.58845
AX-147253266	B06	115228228	4.12196	***			AX-147228957	B08	33072693	0.0456418
AX-147253268	B06	115530806	3.99165	***			AX-176805053	B08	36820073	0.0766864
AX-147253390	B06	120283916	1.01121				AX-147225568	B08	36820742	0.0694378
AX-147253538	B06	124381466	2.35339				AX-147225570	B08	36820910	0.0694389
AX-147253545	B06	124476859	2.34508				AX-176812838	B08	36821218	0.0619651
AX-147253575	B06	124770106	2.74979				AX-176807585	B08	36823688	0.0619292
AX-147253713	B06	127612777	2.51615				AX-176802601	B08	36826493	0.380923
AX-147253740	B06	128289653	2.51683				AX-176793825	B08	36828604	0.380939
AX-147253779	B06	128992668	2.29503				AX-176808178	B08	36833226	0.386582
AX-176820915	B06	129575475	1.83296				AX-176796159	B08	36833230	0.386582
AX-147253886	B06	130343046	6.73926	****			AX-176792723	B08	36833243	0.386582
AX-147254039	B06	133321816	6.82604	****			AX-147225598	B08	36838798	0.397873
AX-147254041	B06	133323553	6.81849	****			AX-176803800	B08	36839131	0.401039
AX-147254102	B06	133735471	6.86142	****			AX-176815070	B08	36839576	0.409278
AX-147226599	B06	134109194	5.52551	****			AX-147258408	B08	73340378	0.310867
AX-147254191	B06	135004325	6.69575	****			AX-147258422	B08	77662040	0.303921
AX-147254198	B06	135080269	6.89422	****			AX-147258593	B08	101670375	0.158613
AX-147226735	B06	135770071	6.64451	****			AX-147258622	B08	102977322	0.204655
AX-176791829	B06	135783222	6.65181	****			AX-147258634	B08	103537009	0.324188
AX-147226748	B06	135786569	6.65853	****			AX-177641013	B08	103633476	0.380591
AX-147226754	B06	135787388	6.65856	****			AX-147231175	B08	108072552	0.15928
AX-147226756	B06	135787551	6.65856	****			AX-176819642	B08	108072552	0.15928
AX-176815617	B06	135807278	7.41723	****			AX-177644132	B08	109905939	0.0197594
							AX-177643803	B08	110550614	0.00587393
AX-147254304	B07	270626	3.37526				AX-147231262	B08	112925307	0.0367346
AX-147254311	B07	391523	3.15097				AX-147258867	B08	113226569	0.0113114
AX-147254346	B07	831840	2.95767				AX-147258872	B08	113312961	0.00764975
AX-176791987	B07	919868	2.95537				AX-147258881	B08	113601371	0.00712476
AX-147254361	B07	1015560	2.9216				AX-147258883	B08	113633453	0.0236442
AX-147254365	B07	1037512	2.92067				AX-147259027	B08	118293002	0.0323893
AX-176792151	B07	1121226	2.91924				AX-147259053	B08	119368164	0.7118
AX-177641448	B07	1369152	2.90032				AX-147259163	B08	121556595	2.01516
AX-176791822	B07	2671333	1.65208				AX-147259182	B08	122223999	2.01513
AX-147227165	B07	3073847	2.0402				AX-147259195	B08	122363848	1.98564
AX-147254570	B07	3080948	2.04021				AX-147259220	B08	122831418	1.96839
AX-147254586	B07	3309551	2.31163				AX-147259221	B08	122897408	1.98561
AX-147254636	B07	3941261	5.13266	****			AX-147259300	B08	124336392	1.54403
AX-147254688	B07	4382301	4.41748	***			AX-147259351	B08	125473859	1.6063
AX-147254706	B07	4673512	5.92774	****			AX-176792136	B08	125956737	0.913562
AX-147254725	B07	5155467	6.139	****			AX-147259480	B08	128158193	2.10886
AX-147254792	B07	5966992	6.09175	****			AX-147259486	B08	128211868	2.17941
AX-147254826	B07	6386807	5.73246	****			AX-147259496	B08	128323260	2.29712
AX-147254849	B07	6688891	5.35777	****			AX-176792038	B08	128637022	2.29634
AX-147254864	B07	7278391	5.3481	****			AX-147259523	B08	128894510	2.29504
AX-147254891	B07	8538334	4.73246	****
AX-147255209	B07	18647940	4.64107	****			AX-147259657	B09	1032577	4.14951	***
AX-176823337	B07	19639295	4.76756	****			AX-147259681	B09	1404687	3.48321
AX-177640563	B07	22555654	2.04108				AX-147259684	B09	1418475	3.49436
AX-147255407	B07	27113953	2.76914				AX-147259699	B09	1605429	3.49525
AX-147255421	B07	27860283	2.76939				AX-147259703	B09	1619980	3.49214
AX-177637996	B07	28573469	4.05801	***			AX-147259787	B09	2624818	3.40468
AX-176791431	B07	31648456	2.40377				AX-147259791	B09	2719395	3.58262
AX-147255541	B07	33022904	2.65573				AX-176791782	B09	2862787	3.72933	***
AX-176791990	B07	36741839	2.70863				AX-147259838	B09	3508840	3.84065	***
AX-177638941	B07	39001094	2.70882				AX-176791539	B09	3807796	4.00185	***
AX-147255657	B07	40161223	3.46835				AX-147259886	B09	3956919	4.00166	***
AX-177638127	B07	98978807	3.54702				AX-147259963	B09	5083710	3.90621	***
AX-177641518	B07	104036917	3.65201				AX-147260194	B09	10135479	4.10552	***
AX-147256076	B07	105566627	4.18306	***			AX-147260211	B09	10376197	4.24913	***
AX-147256109	B07	106774615	4.1862	***			AX-147260230	B09	10719853	4.24924	***
AX-176793978	B07	106851423	4.1892	***			AX-147260234	B09	10801176	4.64688	****
AX-176804480	B07	106851536	4.1892	***			AX-176791960	B09	12385370	0.79537
AX-147229545	B07	111244066	2.28976				AX-147260445	B09	13954905	0.986193
AX-176806568	B07	113297618	6.55789	****			AX-147260452	B09	13983443	0.968318
AX-147256330	B07	114323477	6.97892	****			AX-147260453	B09	13984051	0.968279
AX-147256340	B07	114490353	6.97892	****			AX-147260518	B09	15640616	0.973173
AX-147256405	B07	116350309	3.74605	***			AX-177643092	B09	19855804	2.92961
AX-147256413	B07	116532475	3.5917				AX-177643504	B09	20598327	3.14319
AX-147256449	B07	117675646	4.73322	****			AX-177640604	B09	22210750	3.42008
AX-177640874	B07	118405970	4.44088	***			AX-176792156	B09	24898740	3.74881	***
AX-147256496	B07	118840051	4.38496	***			AX-147260811	B09	26142110	3.86573	***
AX-176823719	B07	118843481	4.38496	***			AX-147260846	B09	27563919	3.86574	***
AX-147256506	B07	119146521	4.15444	***			AX-147260872	B09	29510686	3.86521	***
AX-147229878	B07	120267615	3.96792	***			AX-147260916	B09	32634012	3.62323
AX-147256570	B07	120558364	4.16231	***			AX-147260926	B09	33805614	3.48354
AX-176817880	B07	120684461	3.87078	***			AX-147260956	B09	36640447	3.86177	***
AX-176791974	B07	121786584	3.99743	***			AX-176804223	B09	41788230	0.380491
AX-147256628	B07	121936175	3.7376	***			AX-147261029	B09	42956353	3.86414	***
AX-147256658	B07	122415857	4.19325	***			AX-147261091	B09	50015557	3.86574	***
AX-147256681	B07	122864685	4.19327	***			AX-176811401	B09	50024895	3.86574	***
AX-147256698	B07	122997921	4.19327	***			AX-176812165	B09	50027352	3.86574	***
AX-147256704	B07	123068995	4.19327	***			AX-176796601	B09	50051330	3.86574	***
AX-147256721	B07	123241444	4.19328	***			AX-176801542	B09	50055719	3.86574	***
AX-147256773	B07	124014849	4.33733	***			AX-147233346	B09	50058047	3.86572	***
AX-147256778	B07	124151442	4.33733	***			AX-147261211	B09	79642894	2.28706
AX-147256817	B07	124642564	4.13309	***			AX-147261253	B09	89388921	3.86561	***
AX-176791477	B07	124806514	4.14083	***			AX-176810869	B09	97172470	3.86554	***
AX-147256831	B07	124808289	4.14083	***			AX-176796853	B09	97613023	3.85905	***
AX-147256871	B07	125572052	3.06621				AX-177640347	B09	112363497	3.08452
AX-147256877	B07	125624042	3.06621				AX-176801597	B09	114206705	3.86466	***
AX-147256898	B07	125925487	3.0662				AX-147261634	B09	125220602	3.47183
							AX-177638066	B09	126944854	3.78989	***
AX-147256922	B08	60902	1.49246				AX-177637637	B09	126996989	3.86552	***
AX-147256928	B08	298197	1.49118				AX-147261694	B09	128347424	3.86548	***
AX-177643680	B08	1067792	1.53776				AX-177637290	B09	129848706	4.25325	***
AX-147257032	B08	1194269	1.53775				AX-147261853	B09	135376574	3.86772	***
AX-177644636	B08	1345574	1.53774				AX-176808207	B09	137716024	0.550325
AX-176801554	B08	1895781	0.818205				AX-147261962	B09	137987524	3.54347
AX-147257139	B08	2233615	0.818133				AX-147261968	B09	138035545	2.81058
AX-147257178	B08	2454730	0.818136				AX-147262017	B09	138989973	2.82594
AX-147257243	B08	3136502	1.00449				AX-147234367	B09	143198232	0.131081
AX-147257262	B08	3465897	0.484369				AX-147262346	B09	143618134	0.1062
AX-176791821	B08	3524052	0.484367				AX-177638435	B09	146828839	0.174282
AX-147257270	B08	3608931	0.530924
AX-176791743	B08	4769423	0.225255				AX-147209362	B10	484822	1.30856
AX-177643426	B08	5678750	1.40802				AX-147262827	B10	757821	1.30525
AX-147257458	B08	6300409	0.539008				AX-147262885	B10	1286339	1.99859
AX-147257470	B08	6406730	0.693331				AX-147262896	B10	1452808	1.88357
AX-147257484	B08	6642505	0.693355				AX-147262944	B10	1916443	1.90609
AX-177642834	B08	7259589	1.63705				AX-147234894	B10	2047199	2.18129
AX-147257516	B08	7439204	1.78251				AX-176791790	B10	2284240	2.20458
AX-176823225	B08	7798891	1.803				AX-176791992	B10	3020920	2.41977
AX-147257729	B08	13636051	0.500068				AX-147263035	B10	3199247	2.41976
AX-176806766	B08	15969665	1.46381				AX-147263086	B10	3699190	2.28117
AX-176819410	B08	15974491	1.46381				AX-147263108	B10	3837269	2.28417
AX-176808584	B08	15975986	1.56809				AX-147263112	B10	3847206	2.90588
AX-176809193	B08	15979205	1.56809				AX-147263125	B10	4025926	2.67097
AX-176807298	B08	16126958	1.4373				AX-147263173	B10	4582823	2.82889
AX-147257828	B08	17906817	1.34283				AX-176809160	B10	4583984	2.82868
AX-147257868	B08	19625060	3.6451				AX-147263202	B10	5147691	2.73021
AX-147257934	B08	21828533	1.65755				AX-147263217	B10	5531448	2.82887
AX-147257993	B08	23833277	1.68167				AX-147263233	B10	5961085	2.27105
AX-177640112	B08	25534918	1.6609				AX-147211999	B10	8317223	2.27044
AX-147258047	B08	26013615	1.73526				AX-147263331	B10	9190742	2.82998
AX-177641883	B08	28490879	1.12729				AX-176791703	B10	9968629	3.48112
AX-176804099	B08	28852312	1.66327				AX-147263401	B10	10118372	3.48179
AX-176793999	B08	29255254	1.16596				AX-147263446	B10	10717070	2.86726
AX-176805513	B08	29255307	1.22115				AX-147263491	B10	11214359	2.13885
AX-176808255	B08	29255497	1.22115				AX-177639192	B10	11960833	2.58704
AX-176815701	B08	29255521	1.22115				AX-177644269	B10	13247245	2.13375
AX-176814820	B08	30041320	1.44327				AX-176791776	B10	14052510	2.31516
AX-177641506	B08	31741859	4.00099	***			AX-177642573	B10	14149454	2.61742
AX-147228957	B08	33072693	1.45179				AX-147263607	B10	15189329	2.04592
AX-176805053	B08	36820073	1.90157				AX-177639228	B10	19663894	5.40153	****
AX-147225568	B08	36820742	1.90161				AX-147263769	B10	22491904	5.08613	****
AX-147225570	B08	36820910	1.9016				AX-176792092	B10	25381175	4.78648	****
AX-176812838	B08	36821218	1.7328				AX-147263844	B10	27366049	5.0414	****
AX-176807585	B08	36823688	1.72078				AX-147264064	B10	60634925	2.68225
AX-176802601	B08	36826493	1.78213				AX-176810036	B10	96793488	5.81986	****
AX-176793825	B08	36828604	1.76893				AX-147264208	B10	101217593	5.17419	****
AX-176808178	B08	36833226	1.76893				AX-177637244	B10	102847093	5.73947	****
AX-176796159	B08	36833230	1.76893				AX-177638757	B10	106292220	5.69519	****
AX-176792723	B08	36833243	1.76886				AX-147264328	B10	111150033	2.83529
AX-147225598	B08	36838798	1.53896				AX-147264395	B10	113584807	2.95221
AX-176803800	B08	36839131	1.53888				AX-147264426	B10	115833661	2.96317
AX-176815070	B08	36839576	1.53886				AX-177639479	B10	116395569	3.70961
AX-147258408	B08	73340378	1.92371				AX-147264511	B10	118693317	2.68103
AX-147258422	B08	77662040	2.02129				AX-176791558	B10	119275183	2.40296
AX-147258593	B08	101670375	2.24514				AX-176791820	B10	123961122	0.849665
AX-147258622	B08	102977322	2.80047				AX-147264750	B10	125927111	0.829255
AX-147258634	B08	103537009	2.623				AX-177639345	B10	126150964	0.844452
AX-147231175	B08	108072552	2.67603				AX-147264825	B10	128125458	0.927046
AX-176819642	B08	108072552	2.67603				AX-176791475	B10	129422452	0.820538
AX-177644132	B08	109905939	3.69283				AX-147264913	B10	130237287	0.821642
AX-177643803	B08	110550614	2.43491				AX-147264945	B10	130799987	0.82217
AX-147231262	B08	112925307	2.37624				AX-147265042	B10	131806031	2.73965
AX-147258867	B08	113226569	2.39823				AX-176791882	B10	131908361	2.71947
AX-147258872	B08	113312961	2.55303				AX-177642086	B10	133289435	2.04477
AX-147258881	B08	113601371	2.61347				AX-176791643	B10	133449357	2.00245
AX-147258883	B08	113633453	2.60882				AX-147265254	B10	133759254	2.29553
AX-147259027	B08	118293002	2.29256				AX-147265272	B10	133880109	2.27221
AX-147259053	B08	119368164	3.87264	***			AX-177643056	B10	133954862	2.28613
AX-147259163	B08	121556595	6.34335	****			AX-147265291	B10	133973530	2.28112
AX-147259182	B08	122223999	6.30322	****			AX-147265307	B10	134076186	2.28112
AX-147259195	B08	122363848	6.3032	****			AX-147265486	B10	135303526	2.60315
AX-147259220	B08	122831418	6.30321	****			AX-147265500	B10	135518938	2.61851
AX-147259221	B08	122897408	6.33993	****			AX-147265510	B10	135552827	2.61632
AX-147259300	B08	124336392	6.39729	****			AX-177639120	B10	135713446	2.60972
AX-147259351	B08	125473859	6.91251	****			AX-147237311	B10	135771077	2.88566
AX-176792136	B08	125956737	6.64473	****			AX-147265545	B10	135808237	2.88447
AX-147259480	B08	128158193	5.55975	****
AX-147259486	B08	128211868	5.40496	****
AX-147259496	B08	128323260	5.86333	****
AX-176792038	B08	128637022	0.317614
AX-147259523	B08	128894510	0.414367
AX-147228772	B09	294225	1.18392
AX-147228780	B09	370636	1.49114
AX-147259610	B09	444888	1.4911
AX-147259657	B09	1032577	1.22324
AX-147259681	B09	1404687	0.272097
AX-147259684	B09	1418475	0.28029
AX-147259699	B09	1605429	0.280375
AX-147259703	B09	1619980	0.364404
AX-147259787	B09	2624818	0.213118
AX-147259791	B09	2719395	0.128961
AX-176791782	B09	2862787	0.0997117
AX-147259838	B09	3508840	0.266526
AX-176791539	B09	3807796	0.19708
AX-147259886	B09	3956919	0.119672
AX-147259963	B09	5083710	0.399735
AX-147260194	B09	10135479	0.573339
AX-147260211	B09	10376197	0.666099
AX-147260230	B09	10719853	0.676978
AX-147260234	B09	10801176	0.805138
AX-147260445	B09	13954905	0.375067
AX-147260452	B09	13983443	0.37622
AX-147260453	B09	13984051	0.376161
AX-147260518	B09	15640616	0.31406
AX-177643092	B09	19855804	0.187594
AX-177643504	B09	20598327	0.0159347
AX-177640604	B09	22210750	0.15716
AX-176792156	B09	24898740	0.643667
AX-147260811	B09	26142110	0.75405
AX-147260846	B09	27563919	0.501795
AX-147260872	B09	29510686	0.499391
AX-147260916	B09	32634012	1.27599
AX-147260926	B09	33805614	1.09219
AX-147260956	B09	36640447	1.27546
AX-147261029	B09	42956353	1.43281
AX-147261091	B09	50015557	1.36504
AX-176811401	B09	50024895	1.36504
AX-176812165	B09	50027352	1.36504
AX-176796601	B09	50051330	1.38979
AX-176801542	B09	50055719	1.41647
AX-147233346	B09	50058047	1.41645
AX-147261211	B09	79642894	1.7943
AX-147261253	B09	89388921	1.3655
AX-176810869	B09	97172470	1.38845
AX-176796853	B09	97613023	1.53337
AX-177640347	B09	112363497	2.00908
AX-176801597	B09	114206705	1.61227
AX-147261634	B09	125220602	1.99037
AX-177638066	B09	126944854	1.03424
AX-177637637	B09	126996989	0.962673
AX-147261694	B09	128347424	0.79118
AX-177637290	B09	129848706	0.281283
AX-147261853	B09	135376574	0.773617
AX-176808207	B09	137716024	11.4814	****
AX-147261968	B09	138035545	3.0659
AX-147262017	B09	138989973	10.072	****
AX-147262029	B09	139579365	0.778616
AX-176792005	B09	140542408	0.798285
AX-147262139	B09	140933231	0.798281
AX-177644226	B09	141745302	0.183186
AX-147262211	B09	141943686	0.1832
AX-147209362	B10	484822	0.301182
AX-147262827	B10	757821	0.201386
AX-147262885	B10	1286339	0.499623
AX-147262896	B10	1452808	0.517692
AX-147262944	B10	1916443	0.14676
AX-147234894	B10	2047199	0.122809
AX-176791790	B10	2284240	0.112775
AX-176791992	B10	3020920	0.0939322
AX-147263035	B10	3199247	0.149047
AX-147263086	B10	3699190	0.101899
AX-147263108	B10	3837269	0.131502
AX-147263112	B10	3847206	0.131225
AX-147263125	B10	4025926	0.167128
AX-147263173	B10	4582823	1.57211
AX-176809160	B10	4583984	1.57211
AX-147263202	B10	5147691	1.94022
AX-147263217	B10	5531448	1.83762
AX-147263233	B10	5961085	2.03036
AX-147211999	B10	8317223	1.88159
AX-147263331	B10	9190742	1.82076
AX-176791703	B10	9968629	5.04515	****
AX-147263401	B10	10118372	5.00391	****
AX-147263446	B10	10717070	1.50363
AX-147263491	B10	11214359	1.6915
AX-177639192	B10	11960833	1.7309
AX-177644269	B10	13247245	1.81831
AX-176791776	B10	14052510	1.95
AX-177642573	B10	14149454	1.95277
AX-147263607	B10	15189329	2.19675
AX-177639228	B10	19663894	2.14001
AX-147263769	B10	22491904	1.97699
AX-176792092	B10	25381175	1.67482
AX-147263844	B10	27366049	1.79366
AX-176810036	B10	96793488	2.15979
AX-147264208	B10	101217593	1.85561
AX-177637244	B10	102847093	1.85806
AX-177638757	B10	106292220	1.74588
AX-147264328	B10	111150033	2.19388
AX-147264395	B10	113584807	0.535454
AX-147264426	B10	115833661	0.543616
AX-177639479	B10	116395569	0.465951
AX-147264511	B10	118693317	0.672743
AX-176791558	B10	119275183	2.02059
AX-176791820	B10	123961122	1.00742
AX-147264750	B10	125927111	0.811344
AX-177639345	B10	126150964	0.961595
AX-147264825	B10	128125458	0.841475
AX-176791475	B10	129422452	1.0728
AX-147264913	B10	130237287	1.12046
AX-147264945	B10	130799987	1.22596
AX-147265042	B10	131806031	0.868594
AX-176791882	B10	131908361	0.868446
AX-177642086	B10	133289435	0.536712
AX-176791643	B10	133449357	0.681513
AX-147265254	B10	133759254	1.51769
AX-147265272	B10	133880109	1.51818
AX-177643056	B10	133954862	1.5184
AX-147265291	B10	133973530	1.51771
AX-147265307	B10	134076186	1.62978
AX-147265486	B10	135303526	1.9451
AX-147265500	B10	135518938	1.95686
AX-147265510	B10	135552827	1.95788
AX-177639120	B10	135713446	1.65527
AX-147237311	B10	135771077	1.40435
AX-147265545	B10	135808237	1.405
